# Supplementary material for: Glucolipotoxicity Alters Insulin Secretion via Epigenetic Changes in Human Islets
Source: Oxford University Press journal article supplement (doi:10.2337/db18-0900), 2019-08-16
Supplement: db180900supplementarydata2.xlsx [file db180900supplementarydata2.xlsx]

## Sheet: Sheet1
Supplementary Table 1. Differentially expressed genes in human islets exposed to high levels of glucose and palmitate compared to islets cultured under control conditions (q<0.05).
Gene symbol	Control (mean ± SD)	High glucose and palmitate (mean ± SD)	p-value	q-value
AAK1	189.02 ± 25.35	221.06 ± 34.03	0.00300247	0.0386327
ABCD3	1915.06 ± 216.88	1725.52 ± 230.95	0.00311698	0.0396081
ABHD2	1119.73 ± 193.96	930.40 ± 130.46	0.000612448	0.0162943
ACAD8	145.21 ± 15.62	126.77 ± 11.57	0.00115709	0.0229598
ACE2	95.75 ± 43.50	52.40 ± 15.22	9.86806e-05	0.00672204
ACLY	2079.58 ± 722.90	2689.03 ± 1025.45	0.0005962	0.0161154
ACO1	1279.16 ± 125.46	1152.43 ± 134.41	0.0033511	0.0412807
ACOT13	525.77 ± 82.78	572.90 ± 92.99	0.00277578	0.0369778
ACP5	226.16 ± 96.91	163.09 ± 57.95	0.00121259	0.0235688
ACSF2	75.68 ± 25.48	61.85 ± 23.75	0.00136746	0.025299
ACSL1	720.57 ± 155.02	923.34 ± 230.32	0.000299045	0.0114034
ACSS2	235.58 ± 51.75	194.23 ± 50.01	0.00252339	0.0350352
ACSS3	141.62 ± 57.88	106.96 ± 49.69	0.000789526	0.018714
ACTA2	182.31 ± 94.66	136.13 ± 62.78	0.00352815	0.0422426
ACTB	5503.07 ± 517.84	5130.41 ± 425.47	0.00118002	0.0232855
ACTN4	2694.21 ± 513.38	2437.06 ± 428.44	0.00286894	0.0375621
ACTR2	3136.71 ± 199.09	2843.47 ± 223.75	0.00156508	0.027265
ACVR1B	287.77 ± 35.30	258.46 ± 35.91	0.00244955	0.0344165
ACVRL1	89.33 ± 11.12	78.55 ± 12.50	0.000575017	0.0158346
ADAM10	1938.37 ± 239.31	1753.42 ± 198.71	0.000249807	0.0104336
ADAM19	46.08 ± 8.77	39.24 ± 5.07	0.000498993	0.014737
ADAM28	96.64 ± 48.37	69.29 ± 27.84	0.00164862	0.02808
ADAM9	3380.18 ± 593.57	2984.52 ± 665.67	0.00228893	0.0331323
ADAMTS1	207.63 ± 105.02	181.70 ± 102.09	0.00383963	0.0444639
ADAMTS12	163.02 ± 84.24	114.85 ± 63.67	1.38786e-07	0.00101788
ADAMTS5	42.93 ± 8.13	63.48 ± 18.42	4.88677e-05	0.00510717
ADCY2	75.59 ± 10.11	113.58 ± 29.67	0.000608049	0.0162757
ADCY3	93.78 ± 9.06	81.76 ± 9.99	0.00210897	0.0317391
ADCY9	130.87 ± 12.63	115.78 ± 7.58	0.000330244	0.0120226
ADCYAP1	511.77 ± 274.77	775.02 ± 301.69	1.63748e-05	0.00324414
ADD1	696.47 ± 42.04	630.73 ± 37.20	0.00248459	0.0347755
ADD3	417.87 ± 57.37	344.84 ± 70.23	0.000773869	0.0185407
ADFP	392.38 ± 200.12	655.56 ± 435.38	3.13453e-05	0.00431047
ADH1A	50.95 ± 24.14	28.20 ± 12.23	0.000473563	0.0144335
ADH1C	823.76 ± 533.64	330.86 ± 231.88	0.000256812	0.0105295
ADH6	16.14 ± 2.58	14.08 ± 1.75	0.00347693	0.0419184
ADI1	269.35 ± 55.20	211.94 ± 42.29	6.04905e-05	0.00545468
AEN	166.45 ± 8.46	197.83 ± 33.14	0.00209375	0.0317391
AFMID	121.00 ± 31.75	104.65 ± 25.49	0.000774409	0.0185407
AGR3	33.68 ± 14.23	23.62 ± 9.55	0.000105613	0.00704165
AGRN	147.63 ± 34.18	130.97 ± 33.22	0.000149441	0.00815247
AHI1	278.03 ± 94.87	332.86 ± 103.35	0.00439519	0.0479451
AHR	708.86 ± 174.45	618.27 ± 163.26	0.00016721	0.00854547
AIDA	850.74 ± 75.71	930.92 ± 69.38	0.00172063	0.0287194
AKR1C3	3642.92 ± 894.24	3033.88 ± 983.23	0.00451522	0.0488188
ALAD	199.57 ± 42.96	167.38 ± 33.84	0.00293894	0.0381723
ALDH1A2	68.01 ± 21.06	58.43 ± 20.29	0.000263658	0.0106639
ALDH1A3	624.79 ± 244.78	388.83 ± 176.91	5.35714e-06	0.00220178
ALDH1B1	381.62 ± 94.46	331.70 ± 100.64	0.00178467	0.0292166
ALDH2	576.68 ± 111.41	481.86 ± 84.13	0.000971184	0.0207603
ALDH7A1	598.43 ± 53.89	526.27 ± 67.52	0.000555877	0.0154844
ALDOAP2	48.95 ± 7.06	56.13 ± 10.25	0.000714112	0.0177464
ALG14	160.15 ± 16.65	189.39 ± 27.81	0.000145998	0.00807377
ALG5	326.84 ± 31.33	416.94 ± 51.13	1.60645e-05	0.00324414
ALG9	528.14 ± 50.79	600.47 ± 71.99	0.000312604	0.0116776
AMBP	707.19 ± 453.20	488.05 ± 310.23	0.000980383	0.0208818
AMIGO2	126.95 ± 21.74	116.13 ± 21.83	0.00379587	0.0441898
AMOTL1	159.73 ± 32.73	141.07 ± 25.53	0.000146377	0.00807377
AMPD3	122.70 ± 17.14	153.70 ± 31.99	0.00425963	0.0471
AMY1A	755.38 ± 1014.38	557.85 ± 837.09	0.00265489	0.0360107
AMY2A	1065.78 ± 1454.28	778.94 ± 1183.61	0.00286899	0.0375621
AMZ2	674.87 ± 69.54	744.04 ± 89.39	0.000171344	0.00866668
ANGPTL2	91.26 ± 21.31	74.48 ± 15.35	0.000311761	0.0116658
ANGPTL4	176.22 ± 108.99	221.34 ± 125.44	0.000611045	0.0162841
ANKRD13A	455.60 ± 68.80	367.64 ± 64.81	4.94786e-05	0.00510717
ANKRD18B	18.83 ± 2.97	21.78 ± 3.68	0.000538323	0.0154024
ANKRD37	110.17 ± 43.64	136.92 ± 41.31	0.000281886	0.011097
ANKRD6	141.73 ± 19.07	122.20 ± 11.74	0.00314616	0.0398064
ANLN	61.10 ± 25.02	34.09 ± 17.97	8.38693e-06	0.00238556
ANO10	497.64 ± 62.94	644.42 ± 117.72	4.14242e-05	0.00480719
ANO6	540.98 ± 219.61	476.00 ± 222.12	0.00227836	0.0330828
ANPEP	698.84 ± 353.20	518.65 ± 292.86	0.00120144	0.0235105
ANTXR1	214.06 ± 99.92	186.87 ± 82.83	0.00374564	0.0437607
ANTXR2	140.28 ± 32.58	114.51 ± 39.57	0.00196365	0.0308609
ANXA4	4765.58 ± 1165.98	3577.82 ± 1376.34	0.00104881	0.0216885
ANXA9	212.83 ± 100.28	143.66 ± 76.36	7.59188e-06	0.00238556
APBB2	253.28 ± 50.94	307.69 ± 70.70	0.00327727	0.0408953
APCDD1	181.59 ± 64.03	148.28 ± 58.45	0.000358215	0.0125105
APP	4817.94 ± 272.40	4393.76 ± 251.45	1.32078e-05	0.00296535
ARCN1	1315.67 ± 173.77	1441.85 ± 167.33	0.000759351	0.0183802
AREG	478.00 ± 253.69	651.50 ± 221.28	0.00364475	0.0430478
ARF4	2729.09 ± 330.19	2982.60 ± 260.44	0.00240108	0.0341026
ARF6	494.98 ± 53.55	439.93 ± 53.94	2.11229e-05	0.00367815
ARFGAP3	522.10 ± 68.03	584.15 ± 65.23	0.00260689	0.0357594
ARG2	331.36 ± 163.57	564.74 ± 231.14	2.93015e-06	0.00195366
ARHGAP11A	81.39 ± 24.71	60.75 ± 15.70	0.00162036	0.0277664
ARHGAP20	19.38 ± 1.61	17.10 ± 1.81	0.00347622	0.0419184
ARHGAP26	164.87 ± 32.46	135.22 ± 25.06	2.79984e-05	0.00413837
ARHGDIB	221.38 ± 65.06	169.31 ± 50.73	0.00218265	0.0322091
ARHGEF3	394.81 ± 100.17	303.08 ± 61.27	0.000100125	0.00679926
ARID5B	408.84 ± 52.37	536.44 ± 100.05	0.000131714	0.00773484
ARL1	905.13 ± 216.51	1070.37 ± 237.03	6.23714e-06	0.0023185
ARL6IP1	4582.02 ± 610.19	4141.46 ± 313.96	0.000553096	0.0154844
ARMET	1246.93 ± 105.87	1606.15 ± 226.46	7.70179e-05	0.00591333
ARPC5	1085.50 ± 104.46	1012.35 ± 99.74	0.00122143	0.0235907
ARRB1	165.19 ± 21.65	140.85 ± 20.47	0.000809694	0.0189726
ARRDC3	1536.15 ± 288.02	1749.26 ± 291.77	0.00209687	0.0317391
ARSI	64.55 ± 18.95	53.81 ± 13.16	0.00388406	0.0448185
ASAH1	2772.52 ± 351.49	2497.83 ± 361.23	0.00083473	0.0192929
ASB13	115.14 ± 10.87	101.43 ± 12.12	0.00250753	0.0348968
ASB9	174.49 ± 99.09	102.10 ± 52.54	0.00201361	0.0311703
ASH2L	939.71 ± 85.13	857.93 ± 91.92	0.0046917	0.049797
ASNS	565.57 ± 97.85	702.72 ± 198.36	0.00458202	0.0491066
ASPHD1	107.54 ± 16.79	129.14 ± 23.56	0.000366438	0.01266
ASRGL1	290.89 ± 40.80	241.18 ± 37.99	0.00226389	0.0329848
ASS1	646.03 ± 215.81	463.17 ± 108.81	4.59367e-05	0.00497892
ATAD4	93.89 ± 33.95	64.48 ± 25.37	0.000256225	0.0105295
ATF3	67.72 ± 16.33	108.32 ± 37.61	0.000158277	0.00837136
ATG2B	330.83 ± 46.43	290.16 ± 30.07	0.00297619	0.0384293
ATP10B	240.00 ± 113.49	187.49 ± 94.32	1.89207e-06	0.00162038
ATP11A	184.88 ± 37.83	155.30 ± 30.46	0.00262328	0.0358278
ATP11C	95.57 ± 24.02	84.14 ± 19.43	0.00333725	0.0412807
ATP13A4	95.71 ± 34.97	79.25 ± 33.59	0.00124656	0.0238292
ATP1A1	4681.48 ± 695.34	3941.93 ± 726.68	5.18366e-05	0.00512299
ATP1A3	95.91 ± 18.47	83.47 ± 14.08	0.00285465	0.0374758
ATP1B4	23.95 ± 2.40	28.31 ± 3.20	0.00433273	0.0474519
ATP2A3	657.45 ± 313.21	558.63 ± 275.70	0.00317746	0.0400413
ATP5EP2	647.34 ± 104.82	748.18 ± 156.35	0.00331605	0.0411513
ATP6V0E1	2813.28 ± 160.85	2656.17 ± 191.27	0.0043011	0.0472938
ATP8B1	660.21 ± 207.12	504.93 ± 185.89	2.6585e-05	0.00409047
ATXN7L1	52.33 ± 3.79	47.24 ± 4.14	0.00286248	0.0375562
AUTS2	50.54 ± 6.14	43.12 ± 4.22	0.00392942	0.0449173
AZI2	278.31 ± 43.08	337.32 ± 43.03	1.37559e-05	0.00302663
B3GALT5	65.64 ± 18.49	49.53 ± 9.41	0.00413635	0.04641
B4GALT5	639.74 ± 143.11	522.67 ± 170.95	6.39188e-05	0.00549033
B9D1	89.17 ± 10.57	106.55 ± 18.85	0.00435348	0.0476318
BAAT	60.13 ± 26.57	45.76 ± 25.95	0.000637721	0.0166842
BAMBI	412.51 ± 102.18	351.02 ± 115.27	0.00280633	0.0371776
BARD1	84.48 ± 25.92	69.51 ± 21.38	0.000550516	0.0154499
BAT5	149.07 ± 20.66	169.36 ± 31.00	0.00105632	0.0217823
BBS2	477.74 ± 118.37	408.28 ± 79.46	0.000642162	0.0167514
BBS4	308.71 ± 53.02	342.58 ± 52.62	0.0039237	0.0449173
BCAM	148.71 ± 31.32	129.36 ± 27.07	0.000196325	0.00928956
BCL11A	92.77 ± 13.83	78.17 ± 11.53	0.00147531	0.0263265
BCL2L11	58.41 ± 12.91	53.05 ± 13.27	0.00362985	0.0429155
BCL2L13	286.07 ± 33.39	319.03 ± 37.58	0.00391099	0.0448185
BCL2L15	169.89 ± 63.63	126.78 ± 47.12	0.00174919	0.0289373
BCR	92.05 ± 8.68	85.95 ± 10.21	0.000362672	0.0126061
BDKRB2	147.34 ± 33.52	127.91 ± 41.52	0.000540484	0.0154051
BEST1	33.00 ± 2.88	46.03 ± 11.50	0.00102043	0.0214122
BET1L	156.66 ± 15.41	179.72 ± 13.89	0.000449062	0.0139721
BEX2	296.54 ± 74.45	346.42 ± 79.87	0.00446547	0.048441
BEX5	231.74 ± 49.24	301.95 ± 64.31	0.000222905	0.00994822
BGN	472.35 ± 232.43	370.26 ± 181.68	4.99053e-05	0.00510717
BHLHA15	98.13 ± 7.20	112.02 ± 11.33	6.84933e-06	0.0023185
BHLHE41	284.80 ± 52.83	228.09 ± 45.64	0.000187545	0.0091699
BICC1	464.74 ± 188.96	375.66 ± 169.00	6.59451e-05	0.00558061
BID	164.12 ± 21.80	148.56 ± 19.91	0.00235678	0.0337229
BIRC5	52.71 ± 6.91	44.84 ± 4.73	0.00233951	0.0335659
BMF	126.61 ± 27.33	100.73 ± 24.19	5.38025e-05	0.00519206
BMP1	168.49 ± 26.69	147.53 ± 18.73	0.00302642	0.03885
BMS1	864.37 ± 172.19	940.08 ± 181.57	0.00310288	0.0395088
BNIP1	61.22 ± 6.15	77.34 ± 10.11	5.59902e-05	0.00531002
BPIL2	72.94 ± 47.84	200.29 ± 156.92	0.000243555	0.0103538
BRCA2	24.14 ± 6.38	20.39 ± 5.06	0.000581759	0.0159008
BRD3	215.99 ± 11.75	196.40 ± 16.01	0.000583959	0.0159411
BRD7	70.74 ± 14.30	86.29 ± 14.49	0.000290869	0.0112475
BRI3BP	247.88 ± 33.97	217.80 ± 20.32	0.0023146	0.0333729
BRP44L	529.39 ± 72.02	578.27 ± 87.22	0.00236184	0.0337229
BTG3	624.38 ± 128.47	709.27 ± 83.83	0.00298999	0.0385397
BUB1	39.84 ± 8.87	28.93 ± 6.69	0.000460456	0.0141682
BUB1B	33.45 ± 8.41	24.92 ± 6.51	0.00342325	0.0416593
BXDC2	373.02 ± 36.43	421.55 ± 41.71	0.000326794	0.0119639
BZW1L1	2359.37 ± 203.39	2555.33 ± 127.02	0.000380156	0.0128758
C10orf26	234.27 ± 37.49	200.17 ± 41.01	1.02183e-05	0.00258202
C10orf58	735.86 ± 147.25	662.58 ± 107.96	0.00204227	0.0313354
C11orf10	1374.06 ± 212.50	1666.34 ± 314.11	0.000238596	0.0102333
C11orf60	690.20 ± 99.92	766.22 ± 111.95	0.000399263	0.0130145
C11orf75	208.71 ± 23.84	249.60 ± 35.91	0.000964472	0.0207312
C11orf9	126.29 ± 27.48	111.03 ± 28.04	0.00140587	0.025649
C12orf32	159.00 ± 11.70	142.17 ± 14.76	0.00312267	0.0396081
C12orf48	11.33 ± 1.63	9.28 ± 2.77	0.000555968	0.0154844
C12orf66	126.85 ± 15.64	140.81 ± 17.42	0.00121871	0.0235907
C13orf34	39.91 ± 7.71	47.07 ± 7.60	0.00163011	0.0278689
C14orf1	710.96 ± 76.17	630.20 ± 44.84	0.00163141	0.0278689
C14orf153	156.36 ± 19.56	177.44 ± 23.23	0.00340106	0.0415501
C14orf159	135.83 ± 28.18	117.01 ± 28.05	0.000954939	0.0206193
C15orf24	900.80 ± 102.65	990.54 ± 98.61	0.000348651	0.0123122
C17orf28	256.09 ± 31.49	308.06 ± 50.77	0.000566646	0.0156846
C17orf45	1580.86 ± 156.46	1782.33 ± 241.39	3.97098e-05	0.00480719
C17orf71	125.26 ± 16.08	111.69 ± 11.63	0.00232367	0.0334379
C17orf91	135.66 ± 22.50	179.74 ± 28.35	0.000321866	0.0119023
C18orf24	12.13 ± 1.53	10.57 ± 1.67	0.00235865	0.0337229
C18orf54	18.08 ± 3.43	15.16 ± 3.64	0.00407546	0.0460319
C18orf58	65.06 ± 19.34	50.59 ± 12.71	0.000851365	0.0195198
C19orf10	791.93 ± 86.57	1012.39 ± 152.68	0.000112232	0.00726451
C19orf30	485.64 ± 172.64	698.98 ± 206.46	2.3572e-05	0.0039159
C1orf114	52.66 ± 15.92	65.42 ± 20.52	0.00099153	0.0210125
C1orf122	131.28 ± 13.78	149.26 ± 18.65	0.00463766	0.0495422
C1orf192	17.57 ± 3.62	25.67 ± 10.72	0.00446928	0.048441
C1orf194	42.28 ± 5.76	50.28 ± 8.92	0.00203757	0.0313354
C1orf27	292.92 ± 45.70	345.44 ± 46.89	0.000111894	0.00726451
C1orf43	1613.15 ± 89.04	1812.12 ± 133.43	3.58929e-05	0.00475532
C1orf61	11.98 ± 2.36	13.78 ± 3.18	0.00198524	0.0310008
C1orf9	405.70 ± 66.25	475.31 ± 88.18	0.00210325	0.0317391
C1QB	84.15 ± 22.16	67.12 ± 11.51	0.00387679	0.0447999
C20orf111	235.21 ± 36.71	262.74 ± 54.03	0.000516473	0.0150115
C20orf199	512.34 ± 138.34	631.47 ± 172.32	0.000878115	0.0198773
C20orf26	36.71 ± 9.36	51.87 ± 17.18	0.000300866	0.0114388
C21orf45	190.49 ± 28.59	170.85 ± 33.18	0.00109809	0.0222679
C22orf13	302.33 ± 50.89	278.90 ± 48.56	0.00130851	0.0245863
C22orf42	189.50 ± 84.49	252.88 ± 115.81	0.00316793	0.0399441
C2orf30	853.72 ± 299.95	1110.76 ± 331.69	2.5521e-06	0.00181138
C2orf39	16.61 ± 1.65	19.77 ± 3.59	0.00107827	0.0220694
C2orf52	26.43 ± 3.32	32.18 ± 5.99	0.00469791	0.0497989
C3orf59	291.04 ± 55.60	262.10 ± 42.68	0.00123974	0.0237608
C4orf18	139.58 ± 48.27	97.46 ± 39.68	8.43356e-05	0.006206
C4orf29	220.76 ± 25.42	249.58 ± 20.01	0.000156467	0.00832177
C5orf13	300.14 ± 91.95	210.97 ± 60.60	4.78479e-05	0.00508586
C6	79.29 ± 40.08	61.44 ± 45.09	0.00267705	0.0361582
C6orf115	165.59 ± 25.69	148.34 ± 27.05	0.00130083	0.0245247
C6orf129	58.59 ± 9.03	72.85 ± 16.08	0.000496991	0.0147092
C6orf225	81.33 ± 18.12	99.99 ± 26.81	0.00329935	0.040997
C6orf27	116.27 ± 24.82	140.33 ± 31.89	3.85295e-05	0.00480719
C7orf29	78.10 ± 22.40	61.56 ± 17.11	0.000616566	0.0163249
C8orf47	164.05 ± 26.07	142.12 ± 16.17	0.00159513	0.0275054
C9orf150	822.50 ± 288.08	948.68 ± 327.94	0.00231354	0.0333729
C9orf21	188.49 ± 49.75	226.78 ± 44.05	0.0012532	0.0238736
C9orf25	98.01 ± 8.80	110.84 ± 11.05	0.000305327	0.0115033
C9orf3	108.78 ± 14.90	127.69 ± 22.92	0.000999501	0.0211025
C9orf5	965.61 ± 74.75	850.15 ± 92.96	0.00230963	0.0333449
C9orf7	164.05 ± 20.36	145.16 ± 18.33	0.0039487	0.0450629
C9orf72	209.98 ± 36.36	253.13 ± 40.49	0.000705634	0.0176432
CA10	31.27 ± 4.91	38.19 ± 10.03	0.0025675	0.0354846
CA2	212.94 ± 61.78	165.59 ± 62.07	0.0022163	0.0325478
CACNB2	155.55 ± 49.04	178.77 ± 59.54	0.00364825	0.0430478
CADM1	436.10 ± 107.56	491.50 ± 119.79	3.8732e-05	0.00480719
CAMK2N1	1133.99 ± 260.25	1015.55 ± 203.37	0.00033113	0.0120226
CANX	4770.59 ± 410.65	5121.96 ± 285.54	0.00239882	0.0340984
CAP1	2501.28 ± 226.39	2355.35 ± 248.31	0.00113673	0.0227786
CAPN6	119.02 ± 35.19	104.74 ± 36.89	0.00340804	0.0415764
CAPNS1	1854.80 ± 140.09	1728.66 ± 155.53	0.00282347	0.0373307
CAPRIN1	1904.79 ± 115.28	1715.54 ± 107.20	0.00059764	0.0161345
CARD16	16.79 ± 5.01	12.62 ± 2.96	0.00263857	0.0360008
CARD6	111.22 ± 35.42	85.28 ± 30.22	2.80466e-05	0.00413837
CARS	321.47 ± 39.48	377.56 ± 49.63	0.000698169	0.0175359
CASC5	22.34 ± 4.20	17.30 ± 4.55	0.000592265	0.0161069
CASP1	62.01 ± 22.18	50.11 ± 24.12	0.00152925	0.0268534
CASP5	29.75 ± 13.33	21.36 ± 9.65	0.00155534	0.0271626
CASP6	288.86 ± 54.76	248.92 ± 55.78	0.000621832	0.0163855
CAST	616.46 ± 68.07	689.31 ± 91.26	0.00374104	0.0437607
CASZ1	76.75 ± 7.63	67.04 ± 7.81	0.00109075	0.0222039
CAT	424.96 ± 44.85	385.77 ± 47.92	0.00327098	0.0408455
CAV1	142.86 ± 65.84	109.46 ± 52.24	0.00365082	0.0430478
CAV2	713.57 ± 235.74	599.06 ± 249.34	0.0013925	0.0254895
CBR1	315.86 ± 62.85	280.23 ± 61.42	0.000680533	0.0172414
CBX6	491.17 ± 84.31	440.17 ± 79.73	0.000862779	0.0197105
CCDC102B	79.82 ± 30.09	55.67 ± 27.92	4.31769e-05	0.0048763
CCDC104	453.17 ± 69.46	525.82 ± 91.59	0.00377956	0.0440379
CCDC106	110.34 ± 12.11	118.22 ± 10.99	0.003234	0.0404526
CCDC3	40.85 ± 5.67	33.77 ± 6.63	0.000189987	0.00924701
CCDC72	607.78 ± 52.13	679.20 ± 65.00	0.000397442	0.0129744
CCDC80	93.15 ± 41.31	66.79 ± 25.80	0.00150235	0.0265506
CCDC87	34.84 ± 3.02	39.81 ± 5.31	0.000869168	0.0198175
CCDC9	123.04 ± 12.40	135.90 ± 14.36	0.00343567	0.0417413
CCDC90A	182.14 ± 19.62	217.09 ± 25.75	0.000358108	0.0125105
CCNA2	89.09 ± 21.84	63.50 ± 24.53	0.000247032	0.0104075
CCNB1	163.59 ± 38.11	121.15 ± 42.25	0.000100432	0.00679926
CCNB2	40.49 ± 14.10	25.04 ± 12.84	0.000106902	0.00710607
CCNC	1134.23 ± 110.59	1262.78 ± 89.19	0.000898477	0.0200088
CCND1	50.48 ± 5.12	58.60 ± 3.92	0.0032119	0.0403136
CCNYL1	182.32 ± 32.81	207.29 ± 37.91	0.00250741	0.0348968
CCRL1	167.32 ± 74.47	127.32 ± 74.38	0.00186764	0.029985
CCRN4L	200.60 ± 30.72	235.70 ± 36.26	0.000396212	0.0129637
CD109	40.71 ± 14.15	51.68 ± 18.61	0.00176584	0.0289972
CD163	48.10 ± 14.94	36.88 ± 14.54	0.000800583	0.0188142
CD248	134.21 ± 74.77	90.24 ± 53.16	4.05758e-07	0.0015183
CD274	55.68 ± 10.45	75.50 ± 23.52	0.0028251	0.0373307
CD40	116.69 ± 23.19	136.51 ± 29.77	0.000215966	0.00980106
CD53	159.15 ± 53.28	119.51 ± 45.50	0.00169681	0.0286084
CD55	500.96 ± 34.02	581.57 ± 61.82	0.00114395	0.0228816
CD59	4179.08 ± 675.48	3504.89 ± 610.05	8.374e-05	0.00619428
CD74	391.67 ± 124.74	311.44 ± 110.01	8.83638e-05	0.00637451
CD82	460.55 ± 50.77	394.89 ± 64.67	0.000138305	0.00784295
CD93	120.65 ± 37.70	94.78 ± 27.45	0.00130189	0.0245247
CDK1	24.71 ± 7.62	16.86 ± 5.78	0.000367386	0.01266
CDC26	189.58 ± 23.27	228.00 ± 32.30	0.000253719	0.010492
CDC2L6	167.69 ± 28.93	147.33 ± 23.49	0.00260188	0.0357352
CDC40	506.27 ± 57.33	453.23 ± 40.26	0.00162269	0.0277846
CDH1	1866.72 ± 218.85	1669.39 ± 215.56	0.000344151	0.0123114
CDH11	279.05 ± 131.68	207.47 ± 115.09	2.44758e-05	0.00393087
CDH17	225.02 ± 162.33	99.99 ± 51.82	0.000544592	0.0154251
CDH20	25.58 ± 3.42	30.22 ± 3.90	0.00409054	0.0461313
CDH3	123.56 ± 40.10	96.93 ± 32.01	0.00193611	0.0305809
CDH6	271.14 ± 103.46	200.09 ± 89.77	0.000292034	0.0112728
CDK7	227.68 ± 20.52	266.98 ± 30.30	8.45693e-06	0.00238556
CDKN1A	241.77 ± 56.22	314.00 ± 56.77	0.000126286	0.00764362
CDKN2B	192.31 ± 36.68	168.48 ± 30.43	0.00450121	0.0487152
CDON	148.46 ± 38.21	127.80 ± 33.27	0.00122548	0.0235907
CDR2	458.54 ± 53.70	521.70 ± 85.61	0.00286976	0.0375621
CDRT4	59.91 ± 9.22	83.29 ± 18.17	2.36707e-05	0.0039159
CDV3	963.19 ± 97.90	1087.78 ± 154.54	0.00263985	0.0360008
CDX2	154.30 ± 38.50	127.96 ± 21.28	0.00250565	0.0348968
CEACAM5	494.32 ± 245.27	241.51 ± 116.70	1.69981e-06	0.00162038
CEACAM6	2503.09 ± 1246.68	1358.40 ± 703.10	4.88726e-05	0.00510717
CEACAM7	1643.00 ± 833.94	950.34 ± 601.25	3.20803e-05	0.00435709
CEBPG	303.10 ± 35.85	365.73 ± 75.03	0.00418779	0.0466305
CENPF	27.06 ± 6.81	20.44 ± 4.78	0.000554223	0.0154844
CENPI	27.99 ± 11.64	19.06 ± 8.12	0.00369781	0.0434853
CENPK	30.25 ± 8.60	23.50 ± 8.53	0.00145399	0.0261182
CENPN	135.79 ± 22.43	114.26 ± 22.78	0.000347079	0.0123122
CENPO	64.35 ± 7.50	52.88 ± 9.37	0.000471246	0.0144008
CEP192	127.84 ± 12.47	112.65 ± 8.77	0.00429124	0.0472636
CEP55	36.45 ± 11.27	26.62 ± 6.62	0.000971847	0.0207603
CEP68	88.66 ± 11.47	78.69 ± 9.77	0.00373556	0.0437607
CES2	267.34 ± 98.20	217.62 ± 62.59	0.00103921	0.0216117
CFB	3212.48 ± 1679.39	2678.71 ± 1661.90	0.00269902	0.0363197
CFC1	965.47 ± 480.29	1196.70 ± 588.98	0.000627197	0.0164677
CFC1B	939.74 ± 460.95	1165.21 ± 568.04	0.000911763	0.0201619
CFH	183.15 ± 83.78	143.61 ± 94.11	0.00199041	0.0310596
CFI	396.50 ± 150.98	320.36 ± 128.46	0.00373506	0.0437607
CFL1	2415.38 ± 263.43	2166.20 ± 259.24	0.000234245	0.0101058
CFL2	399.38 ± 61.23	446.48 ± 51.97	0.00125322	0.0238736
CFTR	1690.94 ± 654.90	1197.00 ± 670.50	0.000476853	0.0144917
CGNL1	103.35 ± 38.93	88.32 ± 36.15	0.000511406	0.014896
CHAF1B	123.67 ± 34.49	104.42 ± 25.70	9.64897e-05	0.00660957
CHCHD2	1072.03 ± 142.54	1322.61 ± 141.64	1.88126e-05	0.0034034
CHCHD7	88.73 ± 15.13	104.98 ± 20.89	7.31989e-05	0.00581282
CHEK1	73.82 ± 20.00	57.39 ± 17.63	0.00131503	0.0246456
CHGA	1623.59 ± 643.73	2133.40 ± 722.83	0.000138165	0.00784295
CHGB	4516.73 ± 1443.41	5358.40 ± 1698.17	0.000968168	0.0207421
CHM	355.20 ± 80.42	388.76 ± 88.73	0.0042171	0.0467675
CHP	2001.38 ± 180.56	1858.90 ± 189.52	0.00391568	0.0448489
CHPF	251.75 ± 51.00	317.34 ± 89.31	0.000268122	0.0108047
CHRNA5	321.83 ± 282.85	659.51 ± 497.50	6.99027e-05	0.00573893
CHRNB2	119.59 ± 24.35	130.27 ± 23.74	0.0041058	0.0461743
CHST4	123.23 ± 54.06	82.07 ± 43.55	0.000261797	0.0106639
CIT	33.91 ± 5.55	28.74 ± 3.17	0.00073031	0.0179338
CITED2	493.00 ± 101.30	842.27 ± 337.12	5.13024e-05	0.00512299
CKAP2	149.54 ± 25.50	119.64 ± 19.67	0.00137059	0.025299
CLDN12	1673.00 ± 202.59	1841.79 ± 173.25	0.00330501	0.0410375
CLEC3A	17.93 ± 1.81	20.28 ± 1.55	0.00410245	0.0461743
CLGN	305.72 ± 109.99	393.43 ± 121.27	7.18704e-05	0.00579002
CLIC1	1100.25 ± 210.07	1262.15 ± 191.93	0.00261923	0.0357948
CLIC5	34.81 ± 10.10	25.09 ± 4.33	0.000764398	0.0184137
CLMN	304.80 ± 101.34	250.28 ± 103.90	0.0011994	0.0235105
CLRN3	53.56 ± 32.69	24.28 ± 7.90	2.50176e-05	0.00398876
CMTM7	324.96 ± 87.57	278.63 ± 81.44	9.64791e-05	0.00660957
CNGA3	114.54 ± 44.79	206.06 ± 100.73	5.80155e-06	0.00227944
CNIH4	619.85 ± 85.90	674.63 ± 84.23	0.00244782	0.0344142
CNN3	653.97 ± 200.00	562.26 ± 170.77	0.000133535	0.00773484
CNNM3	219.95 ± 23.21	193.07 ± 20.96	0.000103927	0.00695033
CNTN1	1250.87 ± 617.23	1341.72 ± 563.28	0.00306102	0.0390985
COG1	241.67 ± 26.91	271.67 ± 36.42	0.00289433	0.0377938
COG3	316.20 ± 44.27	372.04 ± 44.74	0.00016564	0.00854547
COG6	967.20 ± 246.19	1155.89 ± 334.16	0.000349993	0.0123212
COIL	642.24 ± 50.37	571.89 ± 51.74	0.00383929	0.0444639
COL12A1	141.75 ± 67.01	100.70 ± 45.68	0.000466113	0.0142638
COL15A1	302.29 ± 109.08	252.75 ± 120.20	0.00273061	0.0365673
COL1A1	1836.70 ± 872.86	1275.09 ± 690.45	1.42835e-06	0.00162038
COL1A2	1979.95 ± 904.15	1565.57 ± 841.60	0.00021808	0.0098066
COL3A1	1129.68 ± 578.68	912.84 ± 523.51	0.00334991	0.0412807
COL4A1	467.73 ± 171.66	361.12 ± 128.90	4.12081e-05	0.00480719
COL4A2	315.34 ± 108.61	260.95 ± 77.23	4.05365e-05	0.00480719
COL5A1	151.04 ± 41.36	128.54 ± 31.05	0.000144279	0.00805008
COL5A2	191.81 ± 82.74	149.23 ± 69.71	2.85681e-05	0.00416271
COL6A1	418.03 ± 140.85	346.39 ± 111.11	0.000414012	0.0132464
COL6A3	886.55 ± 435.26	620.85 ± 341.04	1.63849e-05	0.00324414
COPA	1878.21 ± 266.10	2056.32 ± 327.87	0.000747926	0.0182442
COPB1	1801.71 ± 198.18	1983.59 ± 209.06	0.000247609	0.0104075
COPB2	2012.69 ± 243.60	2156.09 ± 285.80	0.00388514	0.0448185
COPE	438.86 ± 34.31	538.21 ± 70.85	0.000895826	0.0199903
COPG	699.60 ± 103.99	828.06 ± 132.65	0.000224844	0.00998917
COPG2	105.91 ± 7.75	96.04 ± 8.59	0.000135406	0.00777876
COPS4	363.33 ± 70.94	405.31 ± 61.87	0.003724	0.0437101
COPS5	153.03 ± 16.11	168.16 ± 15.48	0.00118598	0.0233405
COPZ1	2129.17 ± 212.55	2351.82 ± 277.72	0.000464171	0.0142241
COPZ2	108.87 ± 18.56	130.60 ± 18.88	0.00072066	0.0177961
COX17	968.32 ± 156.50	1100.60 ± 202.93	0.000934324	0.0204756
COX7A1	169.77 ± 29.45	193.80 ± 35.23	0.000393593	0.0129297
COX7A2	809.03 ± 83.74	923.48 ± 55.68	0.00362288	0.0428791
CPE	5659.70 ± 1720.67	6456.82 ± 1623.57	0.000660415	0.0169475
CPM	339.44 ± 136.27	290.09 ± 134.07	0.00112847	0.0227165
CPNE8	156.88 ± 26.67	191.49 ± 42.98	0.00361245	0.042846
CPNE9	22.73 ± 2.01	24.80 ± 2.67	0.00443212	0.0482283
CPS1	50.24 ± 12.37	42.22 ± 10.55	0.000296162	0.0113723
CPVL	50.28 ± 11.16	43.44 ± 8.96	0.000433759	0.0136731
CRAT	172.44 ± 24.92	158.77 ± 19.11	0.00398694	0.0452646
CREB3	271.23 ± 27.58	331.79 ± 48.34	0.000212899	0.00975896
CRELD2	234.91 ± 51.89	286.59 ± 75.58	0.00126448	0.0240465
CREM	64.83 ± 9.89	87.66 ± 15.91	0.00019115	0.00924701
CRIM1	552.09 ± 129.25	483.51 ± 107.29	0.000576427	0.0158464
CRISP3	331.92 ± 292.79	141.49 ± 125.82	1.86864e-05	0.0034034
CRISPLD2	104.47 ± 64.99	89.91 ± 76.39	0.00283467	0.0373696
CRK	800.11 ± 99.93	743.12 ± 91.92	0.00168771	0.0285502
CRYM	67.10 ± 7.80	78.77 ± 11.95	0.000744601	0.0182034
CSK	134.29 ± 16.65	123.15 ± 17.16	0.0022667	0.0329848
CSRNP1	132.94 ± 18.15	175.87 ± 18.45	1.74728e-06	0.00162038
CSRP2BP	128.78 ± 16.62	116.47 ± 15.75	0.00139505	0.0254938
CTAGE5	159.32 ± 23.93	185.19 ± 32.46	0.00139021	0.0254895
CTAGE6	42.01 ± 11.29	45.26 ± 11.52	0.00249055	0.0348147
CTCF	589.46 ± 56.52	514.70 ± 46.43	0.00156037	0.0272044
CTDSP2	620.12 ± 128.00	546.34 ± 116.14	0.000830917	0.0192648
CTGF	570.19 ± 267.55	404.65 ± 176.63	0.000783215	0.0186501
CTH	72.67 ± 23.82	91.38 ± 36.78	0.00255702	0.035377
CTNNA1	1655.19 ± 191.53	1548.07 ± 127.55	0.00190717	0.0302847
CTNNA2	142.06 ± 79.35	189.56 ± 94.65	0.000271789	0.0108926
CTNNB1	2781.31 ± 298.08	2509.32 ± 322.19	0.00102086	0.0214122
CTNND1	1277.01 ± 173.58	1132.65 ± 190.12	0.000320558	0.0118901
CTPS	198.29 ± 42.33	178.27 ± 41.85	0.00314999	0.0398091
CTSA	1797.61 ± 271.99	1458.21 ± 260.89	3.86978e-06	0.0020767
CTSC	312.22 ± 80.98	237.81 ± 92.35	0.000373078	0.0127662
CTSD	2536.88 ± 457.29	2048.81 ± 418.87	1.7636e-06	0.00162038
CTSE	390.80 ± 166.11	286.71 ± 151.16	0.00462009	0.0493943
CTSH	622.05 ± 225.44	458.30 ± 216.17	1.0742e-05	0.00265563
CTSO	238.06 ± 35.13	192.72 ± 35.55	0.000570013	0.0157362
CTSS	467.59 ± 147.14	330.59 ± 108.72	5.02768e-05	0.00511454
CTTNBP2NL	279.04 ± 51.17	241.84 ± 48.15	0.000343698	0.0123114
CUL7	152.69 ± 25.55	168.95 ± 27.61	0.000850432	0.0195198
CUTA	790.85 ± 147.43	901.63 ± 187.06	0.00282663	0.0373307
CWF19L2	148.14 ± 20.94	133.36 ± 15.38	0.00214888	0.0319872
CXADR	693.37 ± 194.37	604.29 ± 221.08	0.00142118	0.0258319
CXCL10	7.36 ± 1.27	17.60 ± 11.31	0.00142658	0.0258319
CXCL6	488.87 ± 258.59	348.58 ± 178.17	0.00425069	0.0470667
CXorf57	358.26 ± 157.73	428.91 ± 176.56	0.00226658	0.0329848
CXXC5	739.80 ± 60.31	634.37 ± 87.20	0.000126741	0.00764362
CYB5A	1677.16 ± 325.27	1427.40 ± 324.86	0.00272281	0.0364852
CYBB	155.40 ± 95.46	88.00 ± 68.56	0.000119865	0.00745011
CYBRD1	444.42 ± 172.58	315.95 ± 159.31	0.000932212	0.0204632
CYFIP1	478.07 ± 60.73	435.39 ± 70.47	0.00247455	0.0346792
CYGB	155.87 ± 48.84	128.84 ± 35.38	5.04422e-05	0.00511454
CYP1A1	289.28 ± 239.70	117.67 ± 99.63	5.4111e-05	0.00519903
CYP1B1	508.46 ± 279.72	364.72 ± 200.74	0.000186306	0.00916241
CYP2C19	27.64 ± 9.54	20.73 ± 4.50	0.00162034	0.0277664
CYP4F2	35.40 ± 13.64	24.38 ± 5.17	0.000789611	0.018714
CYP4F3	168.80 ± 67.78	103.13 ± 29.97	0.000379841	0.0128758
CYP4V2	299.20 ± 73.79	237.79 ± 48.94	0.000208429	0.00961418
DAB2IP	126.65 ± 27.42	110.46 ± 28.10	0.000124932	0.00764362
DAZAP2	2444.40 ± 302.34	2190.61 ± 291.78	0.000160801	0.00844395
DCBLD2	554.95 ± 156.88	457.48 ± 124.18	6.23067e-05	0.00549033
DCN	320.85 ± 163.27	269.09 ± 208.35	0.00329494	0.0409819
DCUN1D5	396.85 ± 45.09	447.03 ± 44.66	0.000450533	0.0139814
DDAH1	710.08 ± 122.20	593.89 ± 93.19	9.67291e-05	0.00660957
DDIT3	256.32 ± 63.94	521.80 ± 210.42	0.000307402	0.011542
DDIT4	542.85 ± 269.90	742.39 ± 354.29	0.000951801	0.0206122
DDOST	1157.79 ± 50.24	1287.12 ± 100.92	0.00278461	0.0370201
DDR1	827.57 ± 134.66	947.17 ± 208.60	0.000620208	0.0163819
DEFB114	5.21 ± 0.63	5.84 ± 0.87	0.00444101	0.0483012
DENND2C	14.50 ± 1.46	16.87 ± 2.22	0.00400239	0.0454165
DERL1	863.32 ± 92.22	938.71 ± 86.92	0.00232337	0.0334379
DERL2	709.99 ± 37.40	860.70 ± 84.97	3.42989e-05	0.0046016
DGKB	82.95 ± 62.33	99.06 ± 69.32	0.000764918	0.0184137
DHCR24	872.95 ± 253.87	697.23 ± 259.44	0.000216147	0.00980106
DHDDS	501.56 ± 79.58	596.97 ± 114.62	0.000302612	0.0114599
DHFR	187.23 ± 32.16	157.65 ± 35.42	0.00191121	0.0302964
DHRS3	530.78 ± 242.23	388.13 ± 200.42	5.45069e-05	0.00521429
DHRS7	735.39 ± 108.04	785.84 ± 112.80	0.000326083	0.0119577
DIRC2	426.06 ± 76.24	379.62 ± 74.66	0.00164888	0.02808
DKFZP564O0823	1027.60 ± 372.17	1289.83 ± 486.02	6.04309e-05	0.00545468
DKK3	308.30 ± 97.71	248.49 ± 81.03	1.73842e-05	0.00326919
DKK4	31.46 ± 8.85	39.32 ± 11.49	3.9732e-05	0.00480719
DLG1	807.42 ± 110.05	723.63 ± 101.68	0.00300762	0.0386764
DLGAP5	40.46 ± 17.36	28.57 ± 13.13	0.000555483	0.0154844
DMBT1	137.06 ± 114.66	106.24 ± 99.58	0.000238323	0.0102333
DNAJA4	318.34 ± 94.77	424.86 ± 133.11	0.0020814	0.0316271
DNAJB11	934.13 ± 75.69	1116.03 ± 157.35	0.000391194	0.0129044
DNAJB9	384.39 ± 111.04	585.67 ± 124.33	3.68689e-05	0.00480719
DNAJC1	459.08 ± 28.99	494.44 ± 35.76	0.00051941	0.0150769
DNAJC10	1262.89 ± 179.75	1422.60 ± 238.30	0.00370738	0.0435746
DNAJC12	1499.07 ± 417.51	2181.98 ± 644.05	1.26175e-06	0.00162038
DNAJC2	103.89 ± 14.10	116.28 ± 12.04	0.0023277	0.033474
DNAJC3	1097.10 ± 172.08	1259.65 ± 205.34	0.00318473	0.040064
DNM2	355.95 ± 44.15	318.64 ± 30.59	0.00204111	0.0313354
DNMT1	182.42 ± 17.92	163.01 ± 18.27	0.000717445	0.0177566
DOCK1	282.23 ± 26.53	248.48 ± 33.43	0.00134222	0.0250061
DOCK5	84.08 ± 29.46	72.29 ± 24.09	0.00249442	0.0348246
DOM3Z	89.92 ± 15.42	107.01 ± 24.61	0.00244636	0.0344142
DPM1	866.46 ± 68.94	943.35 ± 62.26	0.00397592	0.0452094
DPYD	186.97 ± 46.45	161.82 ± 46.82	0.00139402	0.0254938
DRG1	498.40 ± 38.76	576.82 ± 53.06	0.000473626	0.0144335
DSC2	512.59 ± 140.32	469.89 ± 137.97	0.000198446	0.00934967
DSE	237.06 ± 66.87	203.55 ± 65.27	0.00187287	0.029985
DSEL	84.21 ± 25.93	66.12 ± 17.17	8.68026e-05	0.00630322
DTX3L	370.11 ± 70.50	335.50 ± 55.92	0.00322077	0.0403794
DTX4	116.56 ± 20.59	95.10 ± 14.62	0.000148504	0.00814238
DUOX2	997.30 ± 525.01	739.24 ± 469.77	0.000129912	0.00770457
DUSP1	1061.34 ± 462.30	1166.88 ± 497.75	0.000192949	0.00924701
DUSP26	206.52 ± 68.89	247.34 ± 87.44	0.000757403	0.0183802
DUSP5	357.01 ± 61.36	433.26 ± 75.29	0.00460993	0.0493576
DYM	344.37 ± 23.32	379.34 ± 35.59	0.00277639	0.0369778
DYNLT3	933.62 ± 137.62	1038.16 ± 161.49	0.00171495	0.0287164
DYRK2	204.14 ± 11.70	184.36 ± 7.40	5.66694e-05	0.00535137
DYRK3	126.25 ± 11.42	141.29 ± 17.02	0.000965931	0.0207312
E2F6	202.87 ± 24.05	217.05 ± 25.46	0.00347588	0.0419184
EBF1	64.24 ± 19.28	53.27 ± 10.74	0.00284205	0.0373996
ECE1	666.67 ± 49.23	611.63 ± 57.13	0.00031123	0.0116658
EDEM1	247.95 ± 19.57	288.57 ± 39.14	0.00410739	0.0461743
EDEM2	218.35 ± 22.68	268.42 ± 31.88	0.000217869	0.0098066
EDIL3	867.86 ± 333.49	1187.14 ± 488.06	4.06007e-06	0.00209952
EDN3	243.44 ± 107.81	340.09 ± 182.19	0.000132881	0.00773484
EDNRA	237.81 ± 141.13	176.48 ± 134.18	0.00120942	0.0235489
EEF1A2	368.97 ± 110.35	441.87 ± 142.15	3.14073e-06	0.0019744
EEPD1	93.95 ± 15.05	81.47 ± 9.98	0.000255898	0.0105295
EFNB2	115.55 ± 33.63	94.43 ± 27.15	0.000277036	0.0109784
EFTUD1	112.62 ± 12.82	136.09 ± 14.93	0.000363934	0.0126301
EHMT2	149.38 ± 11.92	128.44 ± 15.79	0.00110519	0.0223501
EIF1	5987.57 ± 380.72	6513.80 ± 564.27	0.00045908	0.0141644
EIF1B	263.65 ± 26.09	298.58 ± 31.99	0.000332294	0.0120252
EIF2AK1	1248.47 ± 162.33	1364.77 ± 215.71	0.00177672	0.0291298
EIF2AK3	372.97 ± 55.15	433.97 ± 69.96	0.00306355	0.0390985
EIF2S2	155.13 ± 27.11	184.65 ± 35.79	0.00206549	0.0315377
EIF3F	210.89 ± 14.82	191.36 ± 16.74	0.0030623	0.0390985
EIF4E1B	114.50 ± 10.78	125.40 ± 8.04	0.00118458	0.0233336
EIF4EBP1	250.45 ± 67.16	283.62 ± 74.78	0.00121593	0.0235907
EIF4EBP2	1215.98 ± 230.83	1076.44 ± 227.26	3.10549e-05	0.00429739
EIF5	915.37 ± 80.72	1031.50 ± 103.97	0.00270386	0.0363197
ELF3	334.95 ± 116.15	278.52 ± 90.44	7.3653e-05	0.00581282
ELL2	1159.81 ± 219.21	1625.93 ± 281.14	4.82831e-07	0.0015183
ELOVL2	43.26 ± 12.12	35.50 ± 9.40	0.00121184	0.0235688
EMD	224.29 ± 17.84	266.82 ± 26.75	7.67658e-05	0.00591333
ENAH	345.26 ± 75.14	288.31 ± 75.11	0.00115739	0.0229598
ENC1	242.55 ± 72.65	184.24 ± 70.76	0.0001926	0.00924701
ENDOD1	383.01 ± 77.75	432.06 ± 91.30	0.00353715	0.0422968
ENG	268.46 ± 66.31	205.17 ± 62.22	4.33567e-05	0.0048763
ENKUR	14.70 ± 4.39	22.00 ± 8.88	0.00174808	0.0289373
EPB41L4A	120.20 ± 25.72	98.52 ± 26.35	0.00197358	0.0309338
EPHB4	131.93 ± 26.39	118.87 ± 31.92	0.00127275	0.0241828
EPHB6	82.11 ± 19.51	68.54 ± 12.01	0.0032066	0.0402701
EPHX1	669.36 ± 161.88	527.37 ± 139.97	8.89331e-05	0.00639461
EPS8	576.88 ± 161.28	452.88 ± 163.19	0.000479329	0.0145468
ERBB2	201.72 ± 51.51	176.46 ± 42.85	0.00076044	0.0183864
ERBB2IP	459.55 ± 60.43	408.48 ± 75.39	0.00284889	0.0374225
ERBB3	208.32 ± 74.30	158.24 ± 56.12	9.51338e-05	0.00658233
ERCC6	191.31 ± 23.63	170.99 ± 20.15	0.00187521	0.029985
ERGIC1	621.75 ± 114.91	544.94 ± 125.69	0.00169197	0.0285927
ERMN	28.55 ± 29.98	34.46 ± 25.37	0.000116502	0.00739407
ERMP1	510.85 ± 89.07	436.72 ± 62.06	0.00097591	0.0208066
ERN1	171.76 ± 23.05	200.34 ± 41.10	0.000845222	0.0194667
ERP27	298.77 ± 167.23	212.46 ± 157.67	0.0022612	0.0329701
ERP44	1377.38 ± 98.16	1627.11 ± 170.92	2.08618e-05	0.00367815
ESCO2	24.98 ± 8.48	17.57 ± 7.56	0.000548089	0.0154251
ESRP1	1009.47 ± 110.92	1255.02 ± 152.25	5.91927e-05	0.00542661
ETF1	318.86 ± 19.98	352.00 ± 33.99	0.000509825	0.0148876
ETV1	448.23 ± 193.56	630.47 ± 292.11	2.71746e-05	0.00413837
ETV4	36.24 ± 5.50	43.44 ± 9.91	0.00176731	0.0289972
ETV5	131.53 ± 36.36	173.98 ± 41.08	0.00339331	0.0415016
EVI2B	29.44 ± 11.06	21.46 ± 7.60	0.00327884	0.0408953
EXO1	38.05 ± 10.69	27.67 ± 7.60	0.000325412	0.0119531
EXOSC1	421.14 ± 32.45	488.10 ± 48.91	0.00105248	0.0217439
EXOSC8	252.60 ± 31.23	294.37 ± 27.95	0.000303505	0.011474
EXT1	458.43 ± 106.75	405.08 ± 105.95	0.00103449	0.0215648
F11	165.37 ± 53.02	110.33 ± 37.42	0.000681733	0.0172414
F2R	194.12 ± 101.56	153.92 ± 86.71	0.000263568	0.0106639
FADS1	396.86 ± 102.40	578.72 ± 160.08	2.14112e-05	0.00367996
FADS2	578.53 ± 194.63	771.37 ± 253.80	2.42508e-05	0.00392336
FAF1	309.48 ± 22.92	326.05 ± 21.04	0.00336143	0.0412877
FAM114A2	211.88 ± 34.64	246.05 ± 35.69	0.00157025	0.0273119
FAM115C	151.81 ± 41.09	232.98 ± 68.59	3.55201e-07	0.0015183
FAM119B	71.66 ± 12.28	82.44 ± 21.11	0.00203686	0.0313354
FAM133A	11.35 ± 2.54	13.01 ± 2.99	0.000215413	0.00980106
FAM148A	247.49 ± 75.51	437.66 ± 155.53	7.21039e-05	0.00579002
FAM148B	178.64 ± 35.73	255.39 ± 63.64	0.000648269	0.0167748
FAM158A	88.78 ± 9.46	105.03 ± 11.24	5.80459e-05	0.00538884
FAM159B	258.94 ± 162.81	186.49 ± 106.97	0.00346913	0.0419184
FAM163A	39.54 ± 7.44	52.05 ± 14.96	0.0029814	0.0384516
FAM167A	80.51 ± 22.68	90.29 ± 19.86	0.000558808	0.0155242
FAM18B2	39.72 ± 2.64	48.46 ± 5.60	5.74036e-05	0.00537457
FAM23A	266.06 ± 103.08	382.80 ± 172.99	0.000726657	0.017904
FAM24B	59.07 ± 10.52	66.75 ± 9.97	0.000768439	0.0184782
FAM38B	41.16 ± 18.68	29.34 ± 7.80	0.00171186	0.0286864
FAM3D	93.42 ± 42.96	67.65 ± 16.72	0.000909278	0.0201508
FAM43A	103.77 ± 12.45	95.49 ± 18.06	0.00421444	0.0467615
FAM71D	12.51 ± 0.52	13.85 ± 1.33	0.00158355	0.0273915
FAM72D	31.75 ± 5.62	25.38 ± 4.14	0.000660877	0.0169475
FAM92A2	45.09 ± 7.60	56.57 ± 9.25	0.00160561	0.0276427
FAM96B	801.54 ± 77.05	922.50 ± 64.58	0.0023764	0.0338865
FANCI	98.29 ± 16.25	81.10 ± 17.63	0.000449598	0.0139721
FARP1	263.06 ± 50.13	232.54 ± 47.13	0.00114243	0.022872
FARP2	196.70 ± 21.58	169.78 ± 19.48	9.23949e-05	0.00645371
FASTKD2	219.60 ± 39.63	241.50 ± 34.87	0.00106179	0.0218337
FBN1	129.96 ± 66.33	105.06 ± 55.15	0.00230437	0.0332908
FBP1	315.59 ± 111.89	245.24 ± 91.02	0.00456395	0.0490667
FBXO15	28.62 ± 3.26	25.36 ± 4.00	0.00120396	0.0235173
FBXO16	123.63 ± 28.87	179.86 ± 47.71	2.12306e-05	0.00367815
FDPS	447.31 ± 69.01	507.82 ± 85.25	0.00284127	0.0373996
FDPSL2A	170.49 ± 24.27	203.92 ± 28.10	1.4955e-05	0.00316392
FGF14	176.58 ± 78.64	211.38 ± 84.51	0.00146411	0.0261904
FGL2	108.90 ± 50.92	66.56 ± 27.77	0.00018351	0.00905307
FHL2	152.15 ± 36.72	128.92 ± 34.14	0.00151494	0.026668
FICD	230.47 ± 63.33	344.06 ± 91.03	5.79894e-05	0.00538884
FKBP11	149.09 ± 15.30	190.81 ± 27.01	2.90642e-05	0.00419868
FKBP14	357.23 ± 87.27	430.10 ± 118.13	0.00319549	0.0401764
FLII	401.32 ± 57.27	466.67 ± 75.88	0.000172804	0.00866668
FLJ14213	73.10 ± 16.60	62.51 ± 10.36	0.000275931	0.0109775
FLJ32065	195.04 ± 65.36	243.61 ± 79.22	0.000217557	0.0098066
FLJ35776	80.01 ± 23.92	103.41 ± 32.52	0.00348508	0.041926
FLJ43276	93.70 ± 8.82	102.21 ± 7.63	0.000386916	0.0128758
FLRT2	435.87 ± 193.13	336.29 ± 157.88	0.00169491	0.0286074
FLT1	103.76 ± 51.13	60.28 ± 32.17	0.000298055	0.0113962
FMNL3	75.64 ± 15.62	66.43 ± 12.86	0.00200816	0.0311627
FMO3	22.94 ± 4.91	20.28 ± 4.70	0.0044692	0.048441
FMO4	61.12 ± 12.09	49.02 ± 12.71	0.000500529	0.0147523
FN1	1679.41 ± 750.78	1212.39 ± 616.78	1.35821e-05	0.00301858
FNDC3A	1149.06 ± 234.91	1331.49 ± 298.41	8.25209e-05	0.0061548
FOLR1	87.98 ± 20.46	63.12 ± 13.60	2.11033e-05	0.00367815
FOS	453.37 ± 363.59	621.98 ± 322.91	0.000167073	0.00854547
FOXJ1	60.96 ± 7.23	73.05 ± 10.28	0.00017292	0.00866668
FOXM1	39.08 ± 9.92	32.45 ± 8.52	0.000408531	0.0131799
FOXO3B	689.72 ± 109.24	627.38 ± 149.89	0.00210074	0.0317391
FPR3	69.67 ± 28.21	51.05 ± 18.59	0.00115831	0.0229598
FRAS1	58.93 ± 13.77	48.54 ± 12.58	0.000539521	0.0154051
FREM2	56.78 ± 18.24	38.89 ± 12.42	6.77854e-05	0.00560879
FRMD6	163.49 ± 64.16	130.43 ± 49.78	0.000548684	0.0154251
FRMPD1	48.39 ± 30.99	86.23 ± 86.54	0.0027056	0.036321
FSTL1	1010.25 ± 276.09	819.57 ± 266.29	0.000239614	0.0102417
FTL	4663.46 ± 322.27	4966.36 ± 280.40	0.000453762	0.0140618
FTSJ1	170.89 ± 15.04	206.73 ± 31.85	0.000874792	0.0198627
FTSJ2	280.67 ± 19.09	260.81 ± 22.83	0.00167175	0.0283817
FUCA2	820.77 ± 120.78	936.40 ± 162.51	0.000166568	0.00854547
FUT8	206.68 ± 28.07	183.70 ± 32.65	0.00150616	0.0265965
FXYD2	723.30 ± 184.02	618.16 ± 215.19	0.00434022	0.0475103
FXYD3	426.46 ± 97.49	333.45 ± 82.86	0.00241351	0.034194
FYTTD1	684.98 ± 58.45	739.06 ± 71.63	0.00335337	0.0412807
FZD4	91.43 ± 8.29	73.81 ± 8.80	2.59245e-05	0.00401692
G0S2	426.60 ± 370.52	542.87 ± 536.66	0.00203999	0.0313354
G3BP1	1968.86 ± 220.38	1718.97 ± 177.39	0.00337373	0.0414001
G6PC2	4063.89 ± 2125.55	3493.38 ± 1827.26	0.000848049	0.0194976
GABRP	113.08 ± 123.55	57.42 ± 41.64	0.00258205	0.0355517
GALC	378.56 ± 53.73	336.94 ± 51.19	0.0011749	0.0232261
GALK2	356.31 ± 45.78	402.08 ± 48.24	0.00129257	0.0244327
GALM	145.88 ± 37.10	115.31 ± 31.21	0.000840311	0.0193805
GALNT1	541.47 ± 102.35	471.39 ± 85.34	0.00181869	0.0294977
GALNT11	355.59 ± 42.74	308.94 ± 44.56	0.000932082	0.0204632
GALNT2	685.47 ± 237.55	616.04 ± 196.01	0.00408498	0.0460922
GALNT4	327.23 ± 105.50	234.92 ± 63.65	0.000156447	0.00832177
GALNT7	515.91 ± 116.39	434.88 ± 112.72	0.00390476	0.0448185
GAP43	190.43 ± 83.61	348.20 ± 144.66	9.75322e-07	0.00162038
GARS	1335.39 ± 81.40	1640.87 ± 164.72	8.80739e-05	0.00637449
GAS2	226.41 ± 88.16	289.61 ± 132.04	0.000535215	0.0153696
GAS6	131.45 ± 33.00	111.10 ± 31.68	0.00421357	0.0467615
GATAD2B	242.02 ± 17.18	219.94 ± 24.93	0.00411115	0.0461743
GATM	1605.05 ± 647.14	1234.70 ± 570.58	0.0040788	0.046046
GBA	404.43 ± 67.94	346.51 ± 79.68	0.00468102	0.0497663
GBE1	576.79 ± 117.31	669.01 ± 180.83	0.00218562	0.0322279
GBGT1	60.41 ± 5.27	54.88 ± 4.92	0.00183497	0.0296069
GBP1	363.74 ± 127.55	290.14 ± 116.70	0.0024102	0.0341912
GBP3	322.12 ± 147.90	246.65 ± 117.64	0.00109486	0.0222434
GCH1	722.34 ± 248.23	1037.59 ± 331.19	1.30435e-05	0.00295866
GCKR	80.79 ± 32.24	101.38 ± 51.28	0.000695654	0.017514
GCNT3	887.83 ± 384.74	602.92 ± 228.47	0.00034524	0.0123114
GCOM1	186.54 ± 78.02	144.33 ± 62.38	0.000804574	0.0188728
GGA2	385.17 ± 69.19	445.06 ± 91.04	0.00361271	0.042846
GGH	157.82 ± 30.83	117.97 ± 31.19	2.78449e-05	0.00413837
GGT1	248.46 ± 89.96	197.07 ± 61.29	0.000114898	0.00736108
GGT3P	188.48 ± 67.60	151.59 ± 43.84	0.000953492	0.0206193
GIMAP2	27.31 ± 7.12	23.82 ± 4.84	0.00415847	0.0465574
GIPC2	335.03 ± 135.01	276.10 ± 117.21	0.0027181	0.0364443
GLI2	62.89 ± 9.81	55.61 ± 8.50	0.00389953	0.0448185
GLIPR1	213.60 ± 104.16	166.40 ± 76.65	0.00212896	0.0318656
GLOD4	999.90 ± 110.29	914.55 ± 91.92	0.00189842	0.0302024
GLRA1	261.77 ± 192.25	129.45 ± 67.43	1.28246e-05	0.00293931
GLRA3	80.76 ± 30.82	112.54 ± 47.02	0.00322353	0.0403794
GLRX3	594.47 ± 57.19	668.86 ± 77.81	0.000461703	0.0141682
GLT8D1	629.41 ± 114.67	805.67 ± 185.72	3.51858e-06	0.001996
GLTPP1	80.01 ± 5.32	85.11 ± 6.87	0.00343459	0.0417413
GLUL	455.52 ± 68.93	407.93 ± 59.55	9.95365e-06	0.00258202
GMPPA	253.31 ± 30.69	309.29 ± 44.93	0.000169313	0.00860348
GMPPB	168.36 ± 16.54	211.20 ± 36.06	0.000383033	0.0128758
GNA13	416.92 ± 36.36	481.35 ± 46.25	0.00189544	0.0301769
GNG4	350.98 ± 132.51	438.58 ± 161.23	0.00210631	0.0317391
GNG5	393.22 ± 86.63	426.67 ± 92.86	0.00428846	0.0472636
GNGT1	4.08 ± 0.40	5.02 ± 0.88	0.000215821	0.00980106
GNL3	757.27 ± 102.23	1033.79 ± 205.78	1.02162e-05	0.00258202
GNPTG	418.40 ± 66.68	363.24 ± 54.21	6.02991e-05	0.00545468
GOLGA2	413.93 ± 77.06	478.03 ± 90.65	0.00280761	0.0371776
GOLGA3	291.92 ± 38.75	341.37 ± 44.30	0.00177964	0.029156
GOLGA4	457.53 ± 73.10	557.94 ± 95.38	0.00280458	0.0371776
GOLGA5	367.68 ± 51.84	422.60 ± 49.93	0.00130784	0.0245863
GOLM1	1482.94 ± 333.19	1209.18 ± 262.49	2.92172e-05	0.00419868
GOLT1B	796.54 ± 146.90	976.28 ± 145.33	8.41612e-06	0.00238556
GORASP2	880.11 ± 121.04	984.32 ± 104.76	0.000298338	0.0113962
GOSR2	234.00 ± 27.92	277.34 ± 45.40	0.00125002	0.0238539
GPR110	246.66 ± 123.69	127.72 ± 61.86	4.38933e-05	0.00487759
GPR125	217.94 ± 49.32	192.19 ± 40.72	0.000378106	0.0128758
GPR34	7.26 ± 1.60	5.81 ± 0.96	0.00225067	0.032882
GPRASP2	273.98 ± 98.48	307.14 ± 96.54	0.00109667	0.0222597
GPRC5B	796.94 ± 322.05	570.14 ± 251.08	6.31744e-05	0.00549033
GPX3	1160.63 ± 474.09	1341.43 ± 482.77	0.000571605	0.0157603
GPX8	247.51 ± 86.32	204.15 ± 88.56	0.000276402	0.0109775
GRAMD4	211.45 ± 45.37	316.01 ± 123.31	0.00163433	0.0278971
GREB1	71.75 ± 27.73	85.69 ± 29.79	0.000404293	0.0131008
GRHL2	129.21 ± 42.02	111.53 ± 40.35	0.00396824	0.0451826
GRK5	120.37 ± 29.33	94.96 ± 20.65	0.00200024	0.0311627
GRN	1956.68 ± 228.19	1580.15 ± 194.75	1.10623e-05	0.00270443
GSDMB	61.77 ± 26.88	42.61 ± 14.94	5.95402e-05	0.00543583
GSTA1	1100.41 ± 585.70	864.38 ± 457.31	0.00132279	0.0247489
GSTK1	362.44 ± 54.44	308.47 ± 64.98	0.00117271	0.0232037
GSTM2	108.38 ± 16.68	94.59 ± 18.99	0.00127493	0.0242032
GTF2E2	349.09 ± 34.02	392.94 ± 33.79	0.000554761	0.0154844
GTPBP2	208.28 ± 32.17	266.75 ± 50.61	0.0012375	0.0237385
GUK1	587.10 ± 53.31	646.87 ± 50.96	0.00122623	0.0235907
GYG1	1070.15 ± 178.70	1267.87 ± 254.19	0.000210634	0.00969556
H2AFV	662.83 ± 57.94	615.55 ± 59.04	0.00132967	0.0248353
H2BFM	102.72 ± 12.22	118.12 ± 16.45	0.00415692	0.0465574
H3F3A	3364.18 ± 306.67	2907.60 ± 263.50	0.000175692	0.0087856
H6PD	108.37 ± 21.40	95.30 ± 15.83	0.00427395	0.0472076
HABP2	363.76 ± 147.30	264.83 ± 175.07	0.00131292	0.0246401
HAS2	239.68 ± 183.88	133.75 ± 112.41	3.62867e-06	0.001996
HAUS4	188.66 ± 34.16	169.23 ± 35.64	0.003501	0.0420244
HAX1	486.66 ± 64.76	594.66 ± 72.38	5.30021e-05	0.00517573
HBXIP	361.13 ± 23.87	393.18 ± 23.01	0.00119046	0.0234075
HCK	62.02 ± 10.18	53.92 ± 7.60	0.00129753	0.0244846
HDAC1	1673.76 ± 114.36	1502.24 ± 163.83	0.00137048	0.025299
HDAC2	816.91 ± 52.01	736.60 ± 85.40	0.00347308	0.0419184
HDAC9	75.52 ± 15.14	86.76 ± 17.32	0.000966719	0.0207312
HDHD1A	179.33 ± 32.59	161.77 ± 37.38	0.00193177	0.0305342
HEG1	178.55 ± 39.41	123.25 ± 31.13	4.0407e-05	0.00480719
HEPH	55.25 ± 29.46	41.75 ± 28.00	0.00428874	0.0472636
HERPUD1	1761.33 ± 293.73	2576.63 ± 705.84	0.000131233	0.00773484
HEXIM1	588.23 ± 75.20	490.64 ± 60.57	0.000160143	0.00844395
HEY1	96.24 ± 23.05	80.31 ± 11.75	0.00159118	0.0274803
HEYL	142.83 ± 28.18	115.73 ± 20.61	4.35619e-06	0.00209952
HHEX	427.58 ± 78.16	342.30 ± 70.48	0.000594367	0.0161069
HIBADH	578.36 ± 78.24	509.10 ± 70.25	0.00468539	0.049778
HIF1A	3106.16 ± 595.61	2612.51 ± 661.98	0.000273364	0.0109198
HINT1	635.37 ± 57.69	699.49 ± 47.38	0.000134125	0.00774561
HIP1	62.45 ± 9.52	53.81 ± 7.41	0.000118785	0.00742491
HIST1H1A	178.72 ± 90.84	142.16 ± 89.08	0.000232109	0.0100654
HIST1H1B	145.61 ± 68.68	93.56 ± 43.24	0.000706716	0.0176432
HIST1H2BC	134.59 ± 32.54	168.43 ± 28.78	0.000887559	0.0199752
HIST1H2BE	36.96 ± 5.94	43.10 ± 7.86	0.00338123	0.041446
HIST1H2BG	62.95 ± 13.34	77.52 ± 16.10	0.000781072	0.0186192
HIST1H2BM	168.11 ± 79.83	108.77 ± 59.14	0.000101035	0.0068191
HIST1H3B	118.08 ± 41.09	92.88 ± 31.16	0.00385528	0.0445983
HIST1H3D	157.40 ± 39.41	142.58 ± 36.73	0.00294879	0.0381943
HIST1H3I	361.50 ± 121.17	283.38 ± 88.34	0.00227945	0.0330828
HK1	169.73 ± 43.68	145.66 ± 43.60	7.67049e-05	0.00591333
HLA-A	5766.85 ± 470.86	5472.42 ± 492.13	0.000120433	0.0074643
HLA-B	4775.63 ± 606.04	4504.29 ± 577.79	0.00170122	0.0286608
HLA-C	3472.54 ± 423.27	3310.84 ± 367.25	0.000181751	0.00898649
HLA-DMA	158.62 ± 42.07	121.06 ± 30.86	0.000146599	0.00807377
HLA-DMB	183.57 ± 45.34	132.32 ± 26.16	6.33662e-05	0.00549033
HLA-DPA1	292.10 ± 97.95	231.34 ± 95.35	0.00294305	0.0381912
HLA-DQA1	125.49 ± 45.79	97.75 ± 45.95	0.0015823	0.0273915
HLA-DQB1	106.23 ± 63.60	81.96 ± 48.74	0.00173794	0.0288814
HLA-DRA	327.54 ± 105.93	232.40 ± 82.22	0.000232393	0.0100654
HLA-DRB3	194.07 ± 58.97	149.38 ± 54.06	0.00107513	0.0220257
HLA-DRB5	59.04 ± 48.67	40.47 ± 27.92	0.000852563	0.0195198
HMGB1	82.20 ± 7.79	70.30 ± 9.19	0.000985387	0.0209276
HMGB3	192.41 ± 25.41	234.65 ± 53.39	0.00453175	0.0489163
HN1	292.38 ± 63.28	252.74 ± 58.61	0.00284839	0.0374225
HNF1B	193.12 ± 53.22	159.75 ± 50.30	0.000270673	0.0108839
HNF4G	123.12 ± 43.53	103.10 ± 34.30	0.00382165	0.0443758
HNMT	89.73 ± 26.78	73.24 ± 22.50	0.00187015	0.029985
HNRNPA0	676.95 ± 49.50	638.81 ± 56.74	0.000640803	0.016745
HNRNPAB	1790.77 ± 171.11	1629.58 ± 230.27	0.00345329	0.0418876
HNRNPK	2952.40 ± 165.59	2712.94 ± 113.41	0.000388951	0.0128758
HOMER1	100.47 ± 23.31	123.08 ± 26.15	0.00233269	0.0335238
HOPX	111.40 ± 30.36	130.15 ± 24.63	0.00184828	0.0297926
HOXB2	87.89 ± 28.85	75.19 ± 21.77	0.000388803	0.0128758
HS6ST1	239.63 ± 23.29	206.02 ± 12.36	1.63754e-06	0.00162038
HS6ST2	51.09 ± 19.21	61.10 ± 19.95	0.00246496	0.0345867
HSD11B1	187.63 ± 93.84	154.56 ± 83.65	0.000770247	0.0184813
HSD17B11	938.29 ± 149.09	831.75 ± 135.61	0.00214425	0.0319872
HSD17B12	1497.45 ± 312.52	1742.92 ± 328.46	0.000643755	0.0167514
HSD17B13	14.06 ± 4.29	19.48 ± 9.11	0.000456307	0.014101
HSD17B2	1294.89 ± 542.29	793.78 ± 485.17	0.00214658	0.0319872
HSD17B7	111.22 ± 18.97	127.08 ± 18.42	0.00431174	0.0473635
HSD17B7P2	93.87 ± 17.76	113.63 ± 20.66	0.00160119	0.0275882
HSD17B8	164.06 ± 27.86	196.18 ± 40.52	0.00175765	0.0289467
HSP90AA4P	60.21 ± 7.57	69.31 ± 6.51	0.00218832	0.0322279
HSP90AA6P	234.19 ± 45.55	340.79 ± 69.08	0.00212642	0.0318584
HSP90AB2P	108.97 ± 12.56	131.12 ± 12.47	0.000324444	0.0119374
HSP90AB3P	798.88 ± 113.38	1003.96 ± 103.04	0.000707252	0.0176432
HSP90AB5P	12.66 ± 1.26	13.94 ± 1.43	0.00105995	0.0218161
HSP90AB6P	9.63 ± 0.60	11.16 ± 0.89	7.8667e-05	0.00596852
HSP90B1	5084.11 ± 780.58	5945.55 ± 943.75	8.59485e-05	0.00626186
HSP90B3P	61.67 ± 10.65	83.75 ± 20.27	2.09425e-05	0.00367815
HSPA13	1616.71 ± 409.88	2147.11 ± 442.98	3.76544e-05	0.00480719
HSPA1L	51.90 ± 8.41	59.95 ± 12.65	0.000883451	0.0199365
HSPA2	161.89 ± 38.57	192.04 ± 43.41	0.000109308	0.00717926
HSPA5	4054.03 ± 636.97	5488.26 ± 1144.06	7.41632e-06	0.00238556
HSPG2	143.41 ± 30.23	125.93 ± 29.47	5.49023e-05	0.00522938
HTRA1	476.97 ± 81.11	392.69 ± 77.00	3.73069e-05	0.00480719
HTRA3	127.37 ± 25.31	106.39 ± 19.33	0.000377747	0.0128758
HYOU1	904.65 ± 187.61	1158.29 ± 267.98	0.00024572	0.0103938
HYPK	113.33 ± 13.39	129.88 ± 18.73	0.000131918	0.00773484
IARS	1666.53 ± 239.38	1940.00 ± 278.26	0.000496947	0.0147092
IARS2	592.33 ± 49.17	532.57 ± 57.32	0.00108791	0.0221842
IBTK	853.60 ± 123.34	996.86 ± 169.87	0.000700346	0.0175705
ICA1	286.77 ± 64.19	353.77 ± 79.34	6.34446e-05	0.00549033
ICAM2	86.90 ± 12.26	101.23 ± 15.87	0.00316024	0.0398699
ICMT	301.65 ± 34.10	272.07 ± 30.31	0.00145533	0.0261182
ID3	371.18 ± 126.93	277.06 ± 116.52	0.000125981	0.00764362
IDH1	1782.34 ± 233.70	1627.77 ± 227.75	0.00244726	0.0344142
IDS	2191.54 ± 659.95	2787.95 ± 800.01	0.000121559	0.00750622
IER3	960.28 ± 311.52	1597.92 ± 362.98	5.33981e-05	0.00517573
IER3IP1	938.55 ± 149.72	1018.14 ± 157.19	0.000644911	0.0167514
IFFO2	128.17 ± 33.07	107.21 ± 27.26	0.00120829	0.0235478
IFI27L1	111.31 ± 15.31	127.01 ± 19.49	0.00389611	0.0448185
IFI27L2	290.92 ± 35.97	325.02 ± 52.62	0.0015887	0.0274591
IFI30	914.56 ± 188.56	706.05 ± 165.34	6.39823e-05	0.00549033
IFRD1	341.46 ± 97.74	473.53 ± 168.17	2.99083e-05	0.00421832
IFT122	138.77 ± 22.46	164.22 ± 36.28	0.00335649	0.0412807
IGF1R	361.20 ± 97.38	288.30 ± 28.80	0.00083476	0.0192929
IGF2	197.39 ± 70.79	276.91 ± 113.87	0.000382224	0.0128758
IGFBP4	636.40 ± 221.69	570.31 ± 207.97	0.00259754	0.0356979
IGSF3	104.41 ± 24.67	86.93 ± 18.80	0.00157702	0.0273599
IGSF6	48.44 ± 17.08	34.98 ± 10.14	0.00045497	0.0140794
IL18R1	13.52 ± 2.53	16.35 ± 4.25	0.00265939	0.0360107
IL1R2	58.06 ± 12.22	68.05 ± 12.13	0.00097006	0.0207603
IL1RL2	38.51 ± 5.43	45.59 ± 7.32	0.000339202	0.0122149
IL8	801.67 ± 480.59	1154.01 ± 679.21	0.00142999	0.0258319
INA	518.82 ± 227.21	595.07 ± 233.26	9.04243e-05	0.00645285
INPP5A	227.05 ± 25.55	208.71 ± 26.23	0.000496267	0.0147092
INPP5F	195.92 ± 72.66	227.08 ± 75.07	0.00208865	0.0317153
INS-IGF2	418.76 ± 134.82	492.71 ± 170.78	0.00181926	0.0294977
INSR	285.30 ± 69.42	237.41 ± 57.43	0.000204204	0.00949521
IPO9	482.96 ± 51.36	439.93 ± 55.16	0.00388988	0.0448185
IQCB1	188.94 ± 46.27	224.75 ± 66.03	0.000133587	0.00773484
IQCG	78.18 ± 10.39	98.98 ± 23.11	0.00189236	0.0301496
IQGAP2	340.92 ± 124.16	233.52 ± 123.48	8.18802e-05	0.0061487
IQSEC1	121.04 ± 27.69	103.20 ± 19.66	0.00293057	0.0380862
IRF1	150.77 ± 43.38	131.05 ± 32.39	0.00248709	0.0347884
IRS2	169.01 ± 27.31	202.48 ± 31.85	0.00135158	0.0251379
ITCH	630.00 ± 56.68	687.33 ± 54.53	0.000424924	0.0134524
ITGA10	30.22 ± 3.56	36.91 ± 4.89	0.000172217	0.00866668
ITGA11	77.39 ± 18.87	63.04 ± 16.75	0.000136057	0.00779583
ITGA3	510.48 ± 142.60	464.20 ± 130.63	0.00393099	0.0449173
ITGA4	65.24 ± 23.25	51.36 ± 15.91	0.00171084	0.0286864
ITGA5	361.27 ± 120.83	282.98 ± 106.31	1.63935e-06	0.00162038
ITGB3	341.11 ± 161.64	243.42 ± 139.56	2.93874e-05	0.00419868
ITGB4	94.21 ± 21.08	87.18 ± 20.42	0.00374358	0.0437607
ITPKC	101.07 ± 22.64	120.17 ± 28.86	0.0015664	0.0272665
ITSN1	134.90 ± 14.24	117.11 ± 9.86	0.00124649	0.0238292
JAG1	290.34 ± 62.11	245.88 ± 63.08	0.00115218	0.0229598
JAKMIP2	146.32 ± 64.56	173.49 ± 64.41	0.00241321	0.034194
JARID2	187.62 ± 36.24	155.35 ± 26.10	0.000273462	0.0109198
JMJD6	202.66 ± 18.88	255.76 ± 33.00	4.1701e-05	0.00480719
JOSD1	883.13 ± 178.87	992.44 ± 227.18	0.00393384	0.0449173
JUB	132.24 ± 36.05	118.80 ± 35.75	0.00376102	0.0439002
JUND	380.71 ± 55.06	432.84 ± 67.34	0.00238065	0.033925
JUP	368.93 ± 72.29	340.57 ± 79.13	0.00383347	0.044458
KANK2	115.07 ± 21.26	105.53 ± 20.70	0.00136515	0.0252834
KBTBD10	616.80 ± 258.29	1093.74 ± 437.40	1.60463e-05	0.00324414
KCNA5	79.56 ± 27.82	97.19 ± 25.76	0.000257942	0.010549
KCNAB2	65.58 ± 9.95	71.22 ± 8.43	0.00312509	0.0396081
KCNE4	275.53 ± 93.08	377.99 ± 108.68	0.00201604	0.0311721
KCNH7	44.10 ± 14.65	50.91 ± 13.70	0.00469086	0.049797
KCNJ15	137.45 ± 64.09	99.18 ± 47.46	0.00140038	0.02557
KCNJ6	263.34 ± 129.43	340.29 ± 148.77	0.000243758	0.0103538
KCNK5	219.12 ± 77.39	145.62 ± 62.09	9.3363e-05	0.00650069
KCNQ5	12.79 ± 1.02	14.28 ± 1.59	0.00383508	0.044458
KCTD12	331.40 ± 65.98	445.44 ± 109.01	0.000181483	0.00898649
KCTD14	173.63 ± 25.02	202.45 ± 37.73	0.00137777	0.0253464
KCTD2	219.56 ± 19.69	201.90 ± 15.91	9.42207e-05	0.00653972
KDELR2	1432.21 ± 172.30	1553.33 ± 175.16	0.00233941	0.0335659
KDM3B	465.32 ± 34.89	420.89 ± 34.15	0.000246116	0.0103938
KDM4A	342.44 ± 46.16	315.80 ± 34.79	0.00447668	0.0484735
KDR	194.62 ± 89.53	105.98 ± 39.21	0.000258509	0.0105526
KGFLP2	40.92 ± 7.77	45.50 ± 9.36	0.000769548	0.0184813
KIAA0101	65.95 ± 20.60	43.07 ± 18.65	0.00071435	0.0177464
KIAA0232	229.47 ± 26.05	196.72 ± 21.96	0.000298004	0.0113962
KIAA0247	248.43 ± 33.95	222.72 ± 29.81	0.00429567	0.0472814
KIAA0430	394.42 ± 40.14	369.79 ± 32.62	0.00236304	0.0337229
KIAA0495	83.41 ± 8.24	74.64 ± 8.45	0.000948264	0.0206023
KIAA0513	129.53 ± 19.84	174.55 ± 39.85	6.12147e-05	0.00549033
KIAA0652	398.84 ± 35.88	436.72 ± 47.55	0.00174489	0.0289096
KIAA0746	1140.87 ± 343.60	1014.06 ± 313.80	0.00446513	0.048441
KIAA1161	121.54 ± 28.66	96.90 ± 22.31	0.000288546	0.0112168
KIAA1244	574.12 ± 190.28	754.51 ± 302.57	0.00048602	0.0146689
KIAA1279	1177.99 ± 200.08	1293.36 ± 243.91	0.00297046	0.0383779
KIAA1797	546.65 ± 139.87	629.04 ± 148.87	0.00239901	0.0340984
KIF11	27.37 ± 6.98	18.59 ± 6.87	8.51207e-05	0.00624289
KIF13B	332.24 ± 39.88	285.06 ± 42.65	0.000696418	0.017514
KIF14	17.04 ± 4.53	14.81 ± 5.60	0.00414056	0.0464336
KIF1C	271.88 ± 50.44	242.07 ± 63.21	0.00348449	0.041926
KIF20A	26.86 ± 6.80	19.89 ± 6.27	0.000365469	0.01266
KIF22	80.56 ± 8.80	75.33 ± 6.58	0.000443088	0.0138678
KIF23	44.35 ± 19.34	32.38 ± 18.96	0.00322948	0.040419
KIF26B	62.56 ± 7.71	71.97 ± 9.94	0.000131387	0.00773484
KIF5A	81.10 ± 25.00	95.95 ± 23.91	0.00114624	0.0228985
KIRREL	129.86 ± 32.12	114.14 ± 32.89	0.00101474	0.0213449
KIRREL3	140.74 ± 30.40	189.46 ± 59.26	0.000247861	0.0104075
KITLG	168.19 ± 48.01	130.97 ± 38.68	0.000231224	0.0100654
KLF11	220.04 ± 28.30	240.24 ± 38.05	0.00444586	0.0483062
KLF13	183.91 ± 19.19	168.06 ± 15.37	0.003014	0.0387235
KLF5	452.13 ± 125.14	385.49 ± 107.39	0.000862468	0.0197105
KLHL24	490.32 ± 96.73	422.98 ± 100.30	0.000875664	0.0198627
KLHL34	91.31 ± 8.40	102.72 ± 10.34	0.00159379	0.0275037
KLHL7	220.74 ± 23.54	194.46 ± 19.51	0.00307124	0.0391739
KMO	13.44 ± 2.28	22.07 ± 9.33	0.00245277	0.0344397
KPNA5	205.40 ± 55.85	225.68 ± 51.77	0.00202514	0.031261
KRT19	1008.75 ± 454.19	823.37 ± 383.61	0.000653503	0.0168566
KRT8	4124.98 ± 1179.49	3493.56 ± 993.51	0.000528093	0.0152617
LACRT	22.91 ± 1.46	25.90 ± 1.80	0.000118481	0.00742491
LAD1	222.19 ± 63.49	185.37 ± 55.38	0.000125023	0.00764362
LAMA2	73.66 ± 37.00	61.39 ± 34.19	4.34385e-05	0.0048763
LAMA3	95.83 ± 25.61	78.04 ± 19.65	0.00335079	0.0412807
LAMA4	244.84 ± 105.99	175.50 ± 87.77	1.47946e-05	0.00316036
LAMB1	608.80 ± 129.23	475.54 ± 124.04	4.2699e-05	0.00486779
LAMB2	256.84 ± 67.20	223.56 ± 68.01	0.000116611	0.00739407
LAMC1	791.03 ± 144.64	670.46 ± 114.65	0.00015042	0.00815247
LAMP1	1062.43 ± 160.47	939.39 ± 141.79	8.58492e-05	0.00626186
LAMP3	129.38 ± 40.84	184.75 ± 63.34	0.00213055	0.0318678
LARGE	104.39 ± 18.25	94.12 ± 16.25	0.00056989	0.0157362
LARP2	212.98 ± 36.77	240.97 ± 31.43	0.00466559	0.0497117
LASP1	712.22 ± 119.94	657.21 ± 103.09	0.000250477	0.0104336
LASS2	1732.43 ± 191.84	1553.43 ± 231.13	0.000348593	0.0123122
LASS6	1299.11 ± 341.90	1137.11 ± 228.47	0.00165648	0.028166
LAYN	46.04 ± 14.27	40.01 ± 13.16	0.0045262	0.0488894
LBA1	58.18 ± 14.58	50.43 ± 9.90	0.00361555	0.042846
LCN2	1471.41 ± 546.23	1136.00 ± 530.05	0.000417612	0.0133167
LCP1	196.83 ± 73.37	161.97 ± 69.28	0.000763249	0.0184137
LCP2	68.18 ± 12.29	59.46 ± 11.19	0.00366007	0.0430875
LDB1	273.81 ± 28.09	244.22 ± 24.00	0.00311152	0.0395958
LDHB	1510.42 ± 255.25	1329.30 ± 288.09	0.000902012	0.0200645
LDLR	855.85 ± 145.18	1145.05 ± 194.18	0.000128638	0.00770329
LEAP2	56.01 ± 22.32	43.57 ± 12.53	0.000348353	0.0123122
LECT1	39.29 ± 12.10	45.31 ± 8.79	0.000611325	0.0162841
LEF1	42.24 ± 23.47	36.99 ± 19.35	0.00268649	0.0362412
LENG1	75.71 ± 5.60	84.18 ± 7.98	0.00221891	0.0325478
LEPREL2	90.17 ± 17.83	104.97 ± 17.81	3.82197e-05	0.00480719
LGALS9	29.26 ± 8.82	21.52 ± 5.31	0.00315558	0.0398341
LGALS9B	273.20 ± 85.48	194.95 ± 81.65	1.78412e-06	0.00162038
LGALS9C	186.20 ± 58.63	134.24 ± 53.71	6.32639e-07	0.00154663
LGR4	841.32 ± 238.98	675.61 ± 224.70	0.000233565	0.0100963
LHFP	131.48 ± 43.46	111.08 ± 43.16	0.0012019	0.0235105
LIMA1	1119.13 ± 176.98	908.40 ± 182.26	0.000150433	0.00815247
LITAF	946.53 ± 244.14	795.54 ± 241.42	1.88712e-05	0.0034034
LLGL2	157.87 ± 20.70	144.28 ± 16.97	0.00326177	0.0407537
LMAN1	2551.57 ± 449.26	3139.86 ± 528.59	4.77938e-06	0.00209952
LMAN2	1379.92 ± 122.19	1513.94 ± 97.39	0.00395661	0.0451064
LMCD1	164.31 ± 42.29	225.35 ± 43.36	6.75003e-05	0.00560879
LMNA	164.60 ± 19.74	192.79 ± 21.94	0.00239491	0.0340841
LMO1	172.31 ± 30.76	204.62 ± 47.78	0.00338641	0.0414633
LMO4	142.77 ± 44.54	123.53 ± 47.03	0.000384533	0.0128758
LNX2	662.05 ± 146.15	561.26 ± 124.09	0.000205096	0.00950028
LOC100129492	92.30 ± 18.03	106.20 ± 22.11	0.00308144	0.0392812
LOC100130433	10.85 ± 1.58	9.25 ± 1.53	0.00180069	0.0293044
LOC100132346	45.38 ± 6.87	55.43 ± 10.26	0.00312204	0.0396081
LOC100132728	172.39 ± 35.69	222.57 ± 32.85	0.000360028	0.0125539
LOC100134869	88.43 ± 8.56	96.52 ± 7.14	0.000669596	0.0170675
LOC119358	86.23 ± 10.69	95.92 ± 7.99	0.000682524	0.0172414
LOC202227	54.38 ± 4.31	65.34 ± 5.00	0.000117179	0.0074081
LOC257039	13.06 ± 2.25	15.59 ± 2.82	0.00418485	0.0466305
LOC387825	653.18 ± 100.66	748.22 ± 113.16	0.00257464	0.0355385
LOC388022	222.88 ± 74.36	273.86 ± 109.30	0.00244782	0.0344142
LOC388692	39.80 ± 2.67	45.45 ± 5.34	0.00224404	0.032807
LOC400657	263.12 ± 36.40	294.89 ± 52.80	0.00431742	0.0473785
LOC401805	138.11 ± 15.38	112.22 ± 15.33	0.000129364	0.00770329
LOC441506	659.55 ± 145.07	780.05 ± 134.99	0.000791743	0.0187177
LOC494141	63.32 ± 6.89	69.90 ± 5.13	0.000289468	0.0112328
LOC645317	182.64 ± 26.42	227.86 ± 27.45	2.35487e-05	0.0039159
LOC654433	88.86 ± 52.91	102.41 ± 59.45	0.00201125	0.0311637
LOC729595	20.54 ± 3.63	24.66 ± 4.14	0.000991961	0.0210125
LOC730144	87.05 ± 13.98	117.36 ± 26.88	0.0009028	0.0200645
LOC732275	51.71 ± 13.66	79.72 ± 36.82	0.00190568	0.0302847
LOC93432	69.87 ± 25.82	37.80 ± 17.63	4.53728e-05	0.00494215
LOH3CR2A	23.38 ± 5.87	32.71 ± 13.32	0.00342016	0.0416593
LOXL2	281.02 ± 106.46	236.17 ± 78.88	0.00422279	0.046807
LPCAT2	114.76 ± 36.49	93.34 ± 32.68	0.00211785	0.031791
LPCAT4	106.40 ± 7.29	91.83 ± 9.55	0.000250852	0.0104336
LPHN2	332.66 ± 67.79	285.83 ± 66.72	0.00320477	0.0402701
LPIN1	566.90 ± 94.11	698.43 ± 106.65	0.00117603	0.0232276
LRFN2	91.44 ± 53.26	109.98 ± 44.46	0.0017969	0.0292861
LRIG3	267.69 ± 38.26	219.73 ± 46.11	0.000706975	0.0176432
LRRC19	36.91 ± 25.66	15.80 ± 7.62	0.00108151	0.0221031
LRRC23	85.96 ± 9.96	101.64 ± 21.58	0.00207049	0.0315419
LRRC8B	157.41 ± 20.48	180.94 ± 25.18	0.000248879	0.0104304
LRRC9	8.88 ± 1.84	12.21 ± 4.63	0.00395428	0.0451032
LRRCC1	67.96 ± 9.34	58.26 ± 11.10	0.00163138	0.0278689
LRRFIP1	162.67 ± 27.55	209.20 ± 41.96	0.000897229	0.0200013
LRRIQ1	12.72 ± 2.04	15.90 ± 2.33	0.000814048	0.0190341
LRRN1	57.30 ± 17.62	45.39 ± 16.59	0.000940476	0.0205106
LRRTM2	54.04 ± 15.71	93.01 ± 37.27	6.41298e-05	0.00549033
LRTOMT	76.62 ± 5.29	87.92 ± 10.86	0.00270158	0.0363197
LSAMP	226.82 ± 109.23	294.91 ± 138.76	0.000295198	0.0113723
LSM1	269.78 ± 19.95	284.27 ± 23.26	0.00178965	0.0292764
LTA4H	1168.35 ± 126.41	1083.12 ± 121.51	0.00108268	0.0221031
LTBP1	386.08 ± 259.80	340.12 ± 241.91	0.00111595	0.0225057
LTBP2	116.27 ± 48.72	99.90 ± 30.87	0.00200976	0.0311627
LUZP1	194.13 ± 27.99	170.22 ± 25.45	0.00107074	0.0219766
LUZP6	991.45 ± 99.02	879.72 ± 48.23	0.00182738	0.0295856
LY6E	348.46 ± 112.50	292.85 ± 59.92	0.00265089	0.0360107
LY75	182.05 ± 66.53	146.99 ± 57.98	0.000543679	0.0154251
LYPD1	260.64 ± 99.00	195.86 ± 63.18	0.000282879	0.0111144
LYRM5	591.92 ± 128.28	666.22 ± 107.30	0.000368928	0.0126636
LYSMD3	625.36 ± 90.90	742.68 ± 120.59	0.000950689	0.0206084
LYZ	2767.11 ± 1646.84	2057.69 ± 1556.02	0.000290453	0.0112475
LZTFL1	116.16 ± 12.44	147.89 ± 24.34	0.000129267	0.00770329
MACROD2	58.37 ± 10.01	53.06 ± 8.02	0.00425264	0.0470667
MAEA	541.44 ± 29.90	501.22 ± 43.18	0.00261383	0.0357948
MAFB	590.44 ± 275.11	482.51 ± 171.34	0.00109984	0.0222829
MAFK	99.33 ± 13.53	115.91 ± 19.89	0.00022971	0.0100654
MAGED4	290.12 ± 85.76	329.76 ± 108.05	0.0034751	0.0419184
MAGEL2	62.84 ± 16.00	83.73 ± 26.78	0.000965247	0.0207312
MAGOHB	227.88 ± 31.99	269.76 ± 46.38	0.00276417	0.0368821
MAGT1	1544.85 ± 207.41	1730.45 ± 222.55	0.00122597	0.0235907
MALAT1	272.42 ± 45.78	341.94 ± 64.49	0.00137483	0.0253136
MAMLD1	88.56 ± 9.33	103.95 ± 11.57	0.000984751	0.0209276
MAN2A2	208.40 ± 32.91	177.05 ± 22.47	0.00294931	0.0381943
MAN2B2	181.57 ± 20.34	155.48 ± 15.14	6.78077e-05	0.00560879
MAOA	286.11 ± 68.76	217.63 ± 57.75	0.000152965	0.00824904
MAP1LC3A	207.50 ± 48.39	243.36 ± 57.55	0.000202231	0.00948739
MAP1LC3B	47.95 ± 5.40	55.51 ± 8.11	0.00396787	0.0451826
MAP1LC3B2	615.51 ± 64.82	740.34 ± 88.29	7.45014e-05	0.00581282
MAP2	343.04 ± 63.59	443.48 ± 70.15	0.000160596	0.00844395
MAP2K3	143.10 ± 23.10	176.68 ± 37.44	0.000111035	0.00726451
MAP3K1	318.35 ± 62.16	275.65 ± 61.65	0.00122765	0.0235907
MAPK3	303.68 ± 32.11	277.72 ± 22.47	0.00214935	0.0319872
MAPK6	445.11 ± 55.49	503.61 ± 56.41	0.000751292	0.0182857
MAPKAP1	610.56 ± 66.95	557.99 ± 80.48	0.00187298	0.029985
MAPKAPK2	523.12 ± 65.91	494.01 ± 59.61	0.000764231	0.0184137
MARS	747.59 ± 85.81	863.69 ± 111.15	0.000446035	0.0139204
MAT2B	484.04 ± 76.74	430.81 ± 81.92	0.00193951	0.0306127
MATN2	166.77 ± 61.56	120.68 ± 35.49	0.000535778	0.0153696
MBOAT1	158.92 ± 55.31	134.84 ± 56.05	0.00290774	0.0379015
MBOAT4	286.61 ± 105.02	449.24 ± 209.10	0.000137531	0.00784295
MCCC1	600.93 ± 111.47	477.83 ± 115.54	0.000358146	0.0125105
MCEE	143.21 ± 24.17	164.51 ± 36.20	0.00335633	0.0412807
MCFD2	697.81 ± 54.44	776.64 ± 55.47	0.00168792	0.0285502
MCL1	2132.98 ± 350.11	2329.63 ± 345.84	0.000263401	0.0106639
MCM10	39.45 ± 10.97	32.19 ± 6.09	0.00270348	0.0363197
MCM5	123.88 ± 29.05	102.95 ± 19.12	0.000172778	0.00866668
MCTS1	234.52 ± 18.23	277.06 ± 32.66	0.000112257	0.00726451
MED10	352.32 ± 61.47	436.60 ± 82.94	2.77931e-05	0.00413837
MED23	358.82 ± 38.96	320.10 ± 26.73	0.00103735	0.0215936
MED27	278.98 ± 40.32	318.13 ± 51.16	0.000642666	0.0167514
MED6	351.90 ± 30.45	382.71 ± 27.91	0.00420071	0.0467507
MEIS2	611.29 ± 164.83	493.29 ± 137.80	0.000652243	0.0168439
MELK	58.32 ± 20.24	36.94 ± 17.89	3.06636e-05	0.0042701
METAP1	692.65 ± 71.37	627.46 ± 86.18	0.00428903	0.0472636
MFGE8	338.75 ± 87.80	272.09 ± 70.06	3.10541e-06	0.0019744
MFSD2	62.04 ± 5.11	74.25 ± 8.29	0.000823108	0.0191645
MGAT4B	298.09 ± 71.08	258.87 ± 61.88	0.000125719	0.00764362
MGC42105	66.56 ± 16.59	77.52 ± 17.06	0.00418778	0.0466305
MGEA5	491.41 ± 105.05	561.58 ± 123.40	0.00148077	0.0263511
MICAL2	167.00 ± 71.83	133.27 ± 48.76	0.000150034	0.00815247
MITF	101.93 ± 16.78	85.64 ± 14.31	0.000163308	0.00849524
MKRN1	1356.62 ± 132.34	1258.51 ± 108.89	0.00352801	0.0422426
MLF1	134.47 ± 23.38	154.68 ± 26.49	0.00210336	0.0317391
MLF1IP	34.11 ± 6.83	28.37 ± 5.09	0.00374709	0.0437607
MLLT11	429.02 ± 175.72	511.26 ± 198.10	0.00225485	0.0329212
MMP14	863.35 ± 308.16	783.12 ± 271.41	0.00406229	0.0459303
MMP15	139.58 ± 20.41	126.76 ± 20.89	0.00104618	0.0216747
MOBKL2C	85.13 ± 5.89	95.50 ± 7.78	0.00313332	0.0396668
MOCS3	176.34 ± 17.01	157.87 ± 11.50	0.00179469	0.0292861
MORF4L2	1361.63 ± 126.97	1519.34 ± 136.49	1.06841e-06	0.00162038
MORN2	274.30 ± 36.19	326.26 ± 55.48	0.000287615	0.0112004
MPRIP	124.47 ± 19.16	107.53 ± 15.94	0.000626376	0.0164658
MPZL2	265.21 ± 93.05	222.72 ± 82.09	0.00198272	0.0309835
MRC2	153.24 ± 61.51	130.24 ± 50.31	0.00039355	0.0129297
MRFAP1	2770.44 ± 165.29	2620.30 ± 166.06	0.00329303	0.0409819
MRPL12	199.42 ± 17.64	217.61 ± 22.14	0.00294386	0.0381912
MSTO1	91.56 ± 13.56	109.10 ± 17.79	0.00304312	0.0390048
MTAP	134.31 ± 22.46	117.74 ± 23.61	0.00114792	0.0228985
MTCH2	1603.15 ± 215.76	1469.96 ± 229.62	0.00398032	0.045236
MTHFD1	392.16 ± 61.11	335.23 ± 70.68	0.000139458	0.00788022
MTHFD2	617.06 ± 203.28	825.03 ± 355.68	0.000889703	0.0199752
MTMR12	474.95 ± 119.14	406.52 ± 86.35	0.00145114	0.0261137
MUC1	1057.65 ± 437.15	721.76 ± 420.19	0.000116118	0.00739407
MUC20	554.57 ± 332.25	369.24 ± 260.19	1.23811e-05	0.00286753
MUM1L1	145.46 ± 47.99	114.38 ± 44.71	0.00129587	0.0244741
MVP	302.46 ± 69.82	258.46 ± 60.32	0.00211343	0.0317845
MXD1	301.37 ± 32.62	360.48 ± 60.23	0.0022897	0.0331323
MYBBP1A	111.67 ± 6.41	120.09 ± 12.98	0.00181518	0.029475
MYCT1	50.85 ± 20.63	38.41 ± 13.15	0.0027721	0.0369656
MYH14	239.69 ± 33.59	216.49 ± 23.40	0.00179593	0.0292861
MYLK	89.05 ± 28.70	78.40 ± 18.86	0.00344619	0.0418459
MYOM1	162.76 ± 62.20	303.66 ± 195.66	0.000778801	0.0186054
N4BP2	92.02 ± 18.27	122.01 ± 23.98	0.000256987	0.0105295
NAMPT	1788.79 ± 417.15	2106.01 ± 610.56	0.00318363	0.040064
NANS	344.08 ± 38.34	428.78 ± 66.89	0.000910347	0.0201508
NAP1L5	387.75 ± 153.93	454.99 ± 158.89	0.00142777	0.0258319
NARS	2574.08 ± 233.90	2361.59 ± 228.13	0.00274386	0.0366587
NAT5	448.88 ± 108.25	508.07 ± 97.57	5.18583e-05	0.00512299
NAV2	150.72 ± 27.12	179.39 ± 36.14	0.00138512	0.0254603
NAV3	59.23 ± 15.09	51.94 ± 13.57	0.00218013	0.0322091
NCAPD2	283.15 ± 31.65	261.59 ± 26.40	0.00200654	0.0311627
NCAPG	56.15 ± 18.75	40.66 ± 19.48	0.00200454	0.0311627
NCAPH	30.77 ± 6.62	24.07 ± 6.84	0.00423263	0.0468925
NCF2	193.47 ± 56.55	253.74 ± 87.85	0.00436438	0.0476898
NCK2	469.66 ± 108.88	419.89 ± 115.36	0.00142409	0.0258319
NCKAP1L	40.02 ± 8.77	31.36 ± 6.23	0.00451405	0.0488188
NCOA4	1758.23 ± 130.49	1562.44 ± 127.63	0.000384704	0.0128758
NCRNA00153	81.39 ± 9.00	94.13 ± 14.04	0.00255811	0.035377
NDEL1	464.32 ± 59.20	556.24 ± 73.98	0.000103596	0.00694928
NDRG2	389.10 ± 101.92	299.35 ± 101.23	0.000610574	0.0162841
NDST1	195.44 ± 24.83	169.46 ± 14.92	0.000129541	0.00770329
NDUFAB1	505.85 ± 40.38	577.60 ± 59.81	0.000146443	0.00807377
NDUFS5	1925.71 ± 161.83	2112.66 ± 215.88	0.0021182	0.031791
NDUFV2	620.13 ± 52.62	673.88 ± 41.37	0.00374679	0.0437607
NEDD4L	430.72 ± 65.15	482.98 ± 75.94	0.00469992	0.0497989
NEFM	319.40 ± 260.94	613.74 ± 444.35	0.000716768	0.0177566
NENF	438.68 ± 64.71	477.85 ± 80.50	0.000937779	0.020494
NEXN	56.15 ± 12.31	49.05 ± 15.71	0.00183363	0.0296069
NFIA	193.75 ± 30.61	151.47 ± 33.83	0.000659902	0.0169475
NFIB	295.49 ± 118.54	246.22 ± 96.87	0.00197566	0.0309338
NFIL3	385.09 ± 67.45	481.50 ± 102.14	4.63327e-06	0.00209952
NFKB2	141.89 ± 28.43	179.05 ± 41.47	0.000712143	0.0177451
NFKBIB	168.52 ± 15.88	188.28 ± 28.56	0.00277806	0.0369778
NID1	161.66 ± 61.78	120.89 ± 53.49	0.000356618	0.0125105
NID2	178.63 ± 76.09	138.80 ± 61.07	1.2158e-05	0.00286753
NME2P1	723.15 ± 90.33	808.82 ± 127.17	0.0027824	0.0370132
NME7	260.19 ± 44.87	311.54 ± 57.62	0.000388051	0.0128758
NMT2	226.33 ± 39.99	207.92 ± 45.54	0.00335412	0.0412807
NONO	2059.10 ± 111.45	1797.20 ± 109.35	3.92982e-05	0.00480719
NOTCH1	74.02 ± 10.50	60.40 ± 8.38	7.195e-05	0.00579002
NOTCH2	381.10 ± 126.74	294.85 ± 111.74	8.04826e-06	0.00238556
NOTCH2NL	273.96 ± 96.16	234.29 ± 90.83	0.00389375	0.0448185
NOTCH3	199.05 ± 32.31	167.17 ± 25.86	2.48233e-08	0.000273087
NP	761.06 ± 228.68	849.63 ± 188.12	0.00377767	0.0440379
NPAS4	35.60 ± 5.78	46.42 ± 8.68	0.000318698	0.0118449
NPC2	1627.93 ± 275.21	1368.84 ± 246.27	7.92225e-06	0.00238556
NPY1R	40.53 ± 21.77	31.10 ± 15.73	0.00118317	0.0233268
NQO1	781.19 ± 240.97	574.00 ± 208.73	2.57215e-05	0.00401692
NR2E3	47.78 ± 3.73	51.35 ± 4.51	0.0040304	0.0456637
NR2F2	262.22 ± 24.37	230.99 ± 24.61	0.000604698	0.0162255
NR4A2	90.69 ± 17.66	149.33 ± 41.65	6.21057e-05	0.00549033
NR5A2	1120.82 ± 459.27	822.12 ± 384.52	0.000423082	0.0134141
NRF1	93.58 ± 5.85	103.98 ± 7.42	0.000490795	0.0147092
NRIP1	418.22 ± 56.24	367.54 ± 54.42	0.000532883	0.0153465
NRP1	659.00 ± 159.67	530.63 ± 137.71	0.0029231	0.038034
NTN4	482.70 ± 141.50	413.45 ± 142.24	9.21267e-05	0.00645371
NUCB2	1764.54 ± 455.85	2192.48 ± 461.81	9.1361e-06	0.00248169
NUDT12	584.69 ± 95.79	517.12 ± 87.58	0.00109405	0.0222434
NUF2	34.34 ± 10.66	23.46 ± 11.55	0.000156525	0.00832177
NUMA1	397.34 ± 37.37	343.39 ± 40.31	0.00264925	0.0360107
NUP88	407.70 ± 39.63	477.44 ± 78.32	0.00154649	0.0270698
NUPL1	321.86 ± 33.73	356.15 ± 36.75	0.00457335	0.0490667
NUS1	939.64 ± 56.15	1012.08 ± 68.59	0.00105789	0.0217943
NUSAP1	66.61 ± 13.80	53.24 ± 13.07	0.00304756	0.0390302
OAS1	189.05 ± 39.57	154.00 ± 39.55	0.00354371	0.042318
OBFC1	160.23 ± 18.32	189.23 ± 28.41	0.000235499	0.0101401
OCIAD2	527.44 ± 83.18	614.38 ± 78.32	6.61708e-06	0.0023185
ODC1	1404.54 ± 230.16	1786.50 ± 419.27	0.00190816	0.0302847
ODZ4	63.01 ± 10.11	74.46 ± 14.48	0.0011958	0.0234706
OLFML1	30.42 ± 18.12	25.02 ± 19.06	0.00103251	0.0215648
ONECUT2	150.61 ± 30.37	119.07 ± 21.26	0.000329457	0.0120213
OR4F16	17.73 ± 4.26	14.76 ± 2.42	0.00416853	0.0465574
OR4F21	19.50 ± 4.52	16.23 ± 2.78	0.00242411	0.0343
OR4K15	9.47 ± 0.77	10.89 ± 1.29	0.000536559	0.0153719
OR6C75	8.71 ± 0.91	7.89 ± 0.87	0.00362564	0.0428887
ORMDL1	316.34 ± 38.57	354.94 ± 41.15	0.00267969	0.0361717
OSBPL1A	93.07 ± 14.46	82.77 ± 15.21	0.00034918	0.0123122
OSBPL3	47.90 ± 9.71	41.22 ± 7.74	0.00210805	0.0317391
OSTC	1026.92 ± 67.30	1252.20 ± 127.33	8.33709e-06	0.00238556
OSTCL	26.90 ± 2.86	31.45 ± 2.22	0.000372254	0.0127578
OSTF1	567.72 ± 69.17	495.28 ± 58.64	0.00207379	0.0315419
P2RX7	26.24 ± 6.85	31.64 ± 6.87	0.000192077	0.00924701
P2RY5	145.68 ± 29.76	116.92 ± 34.94	0.00430103	0.0472938
P4HB	3631.48 ± 346.98	3906.62 ± 420.87	0.00400891	0.0454671
PABPCP2	29.38 ± 1.95	33.49 ± 3.26	0.00218187	0.0322091
PACRG	58.73 ± 16.13	70.82 ± 18.97	0.00120524	0.0235173
PAGE4	14.35 ± 1.25	16.15 ± 1.85	0.00283217	0.0373696
PAH	107.68 ± 37.35	88.43 ± 33.91	0.00188721	0.0301113
PAK3	810.64 ± 277.92	1009.38 ± 347.19	0.000505528	0.0148108
PAK6	87.74 ± 13.44	98.91 ± 15.56	0.00339208	0.0415016
PAM	3515.33 ± 1199.51	5034.55 ± 1465.31	2.53623e-06	0.00181138
PAPPA2	282.68 ± 139.74	412.01 ± 228.07	0.00205135	0.031431
PAPSS1	451.27 ± 37.90	410.44 ± 44.30	0.00249332	0.0348246
PARL	646.10 ± 54.38	709.39 ± 76.79	0.000405037	0.0131056
PARP4	743.58 ± 138.43	624.22 ± 114.71	2.40353e-05	0.00391731
PART1	17.18 ± 4.76	23.33 ± 9.53	0.00151852	0.0267077
PATZ1	112.04 ± 9.65	102.00 ± 13.17	0.00223965	0.032807
PBK	41.01 ± 15.41	26.58 ± 12.87	0.000283624	0.0111238
PBX1	424.73 ± 40.79	346.62 ± 54.82	0.00054893	0.0154251
PCBD2	103.55 ± 12.64	115.83 ± 7.43	0.00204977	0.0314286
PCDH18	127.64 ± 70.46	95.43 ± 59.84	0.00013262	0.00773484
PCK1	192.35 ± 120.09	695.52 ± 442.78	6.76893e-06	0.0023185
PCNA	444.61 ± 60.97	390.11 ± 82.67	0.00171035	0.0286864
PCNP	1557.35 ± 104.18	1712.61 ± 88.25	0.00173569	0.0288762
PCOLCE	158.31 ± 49.96	143.66 ± 60.04	0.00436709	0.0476898
PCSK1	4238.90 ± 1705.37	6149.06 ± 1841.45	1.1737e-06	0.00162038
PCSK5	89.36 ± 25.11	73.38 ± 15.99	0.00264402	0.0360008
PCYOX1	938.68 ± 128.24	826.59 ± 81.42	0.000395589	0.0129637
PDE3B	363.54 ± 148.74	444.94 ± 164.29	0.000230817	0.0100654
PDE4D	53.82 ± 13.34	64.69 ± 15.09	0.00130624	0.0245856
PDGFD	436.45 ± 182.46	293.87 ± 142.06	0.00284156	0.0373996
PDGFRA	199.29 ± 131.41	157.62 ± 147.00	0.00220792	0.0324731
PDGFRB	444.18 ± 216.34	346.38 ± 184.19	2.98964e-05	0.00421832
PDIA3	4777.43 ± 694.23	5190.03 ± 613.63	0.000852482	0.0195198
PDIA3P	5285.41 ± 744.37	5755.43 ± 674.32	0.00145958	0.0261518
PDIA4	1116.75 ± 189.91	1348.65 ± 292.70	0.000588825	0.0160541
PDK4	2530.66 ± 813.87	4059.72 ± 1042.93	2.46766e-06	0.00181138
PDLIM1	541.72 ± 68.86	489.58 ± 68.92	0.00261757	0.0357948
PDLIM5	1017.14 ± 78.87	876.63 ± 98.74	0.000411569	0.0132388
PDZK1IP1	736.96 ± 335.94	635.72 ± 303.46	0.000715576	0.0177502
PDZRN4	11.17 ± 1.20	12.75 ± 1.99	0.0039339	0.0449173
PEG10	1730.26 ± 577.98	3047.03 ± 1173.05	2.2832e-05	0.00386432
PELI2	165.61 ± 23.06	149.75 ± 22.93	0.00172166	0.0287194
PER3	137.72 ± 42.70	103.58 ± 25.49	0.000602536	0.016207
PGM3	781.95 ± 86.79	1042.90 ± 142.68	3.55255e-06	0.001996
PGRMC1	2288.19 ± 289.19	2134.11 ± 214.92	0.000909915	0.0201508
PGRMC2	1322.02 ± 221.79	1451.60 ± 283.32	0.000195626	0.00928956
PHF17	250.61 ± 27.47	282.51 ± 43.11	0.00197813	0.0309338
PHKA1	179.98 ± 43.80	216.90 ± 57.68	0.000253609	0.010492
PHLDB1	84.23 ± 18.46	73.60 ± 17.12	0.000654309	0.0168576
PHYHIPL	143.82 ± 50.99	173.20 ± 54.13	0.00124765	0.0238294
PIGG	186.14 ± 19.02	164.92 ± 12.50	0.00141074	0.0257164
PIGR	1340.22 ± 667.61	760.67 ± 467.55	4.04692e-05	0.00480719
PIGS	302.48 ± 22.90	270.87 ± 26.72	0.00234664	0.0336365
PIK3AP1	379.71 ± 126.07	295.19 ± 110.09	1.21717e-05	0.00286753
PIK3C2B	82.66 ± 9.43	70.20 ± 6.94	0.000121792	0.00750622
PIK3R1	380.20 ± 80.42	313.70 ± 71.89	0.000243679	0.0103538
PIP5K1B	65.39 ± 15.77	54.07 ± 12.68	0.00132733	0.0248128
PITRM1	970.57 ± 116.44	1078.57 ± 162.59	0.00265703	0.0360107
PJA2	2026.26 ± 456.08	2208.76 ± 469.81	0.0030948	0.0394287
PKHD1	70.68 ± 28.15	53.03 ± 19.23	0.00405441	0.0458648
PKIA	95.21 ± 23.85	112.91 ± 31.88	0.00252013	0.0350279
PKM2	1904.84 ± 167.53	1685.39 ± 167.45	0.000227468	0.0100298
PKP2	364.30 ± 99.57	316.19 ± 54.89	0.00345886	0.0419026
PLA2G10	30.11 ± 18.15	18.14 ± 11.23	1.65242e-05	0.00324414
PLA2G12A	293.28 ± 39.78	337.60 ± 53.41	0.00278976	0.0370663
PLA2G7	236.02 ± 83.67	166.66 ± 87.54	0.00305436	0.0390945
PLAT	692.91 ± 431.48	450.98 ± 299.62	0.0012324	0.0236613
PLAU	293.51 ± 159.19	213.66 ± 133.88	0.000239721	0.0102417
PLBD1	162.75 ± 25.20	139.33 ± 28.66	0.0019091	0.0302847
PLCG2	93.07 ± 8.30	83.12 ± 8.09	0.000541051	0.0154051
PLD1	373.23 ± 95.64	281.19 ± 85.53	3.20055e-05	0.00435709
PLEKHA6	279.76 ± 67.53	230.06 ± 40.99	0.000885259	0.0199569
PLEKHA7	110.24 ± 19.23	100.00 ± 18.39	0.00153566	0.0269015
PLEKHB1	289.57 ± 80.28	227.00 ± 78.82	0.00072992	0.0179338
PLK1	66.95 ± 15.76	53.16 ± 8.73	3.91624e-05	0.00480719
PLK3	85.07 ± 12.88	97.36 ± 14.36	0.00088901	0.0199752
PLK4	26.51 ± 6.52	20.51 ± 5.67	0.0018739	0.029985
PLP2	1125.53 ± 229.95	1244.16 ± 213.69	0.00206853	0.0315419
PLRG1	1651.35 ± 133.29	1553.19 ± 134.15	0.00229038	0.0331323
PLS3	826.47 ± 211.22	719.99 ± 214.89	0.0029931	0.0385486
PLSCR4	235.59 ± 63.01	199.03 ± 57.48	0.00120566	0.0235173
PLVAP	288.55 ± 77.75	212.55 ± 65.08	0.00155863	0.0271956
PLXDC1	56.10 ± 11.40	47.14 ± 7.28	0.000396528	0.0129637
PLXDC2	145.54 ± 38.32	118.93 ± 33.08	0.00165031	0.0280826
PLXNB2	508.00 ± 71.89	460.17 ± 68.11	0.00232124	0.0334379
PLXND1	108.60 ± 15.66	97.65 ± 13.37	0.00019504	0.00928866
PMAIP1	80.07 ± 24.21	111.36 ± 66.40	0.00338063	0.041446
PMEPA1	882.00 ± 363.19	696.98 ± 256.62	0.0015728	0.0273345
PMM2	196.19 ± 26.87	248.98 ± 36.99	1.23732e-05	0.00286753
PNMA2	342.44 ± 141.97	376.11 ± 149.98	4.06264e-05	0.00480719
PNPLA8	493.38 ± 72.90	609.72 ± 81.99	2.7575e-05	0.00413837
PODXL	238.83 ± 67.23	202.79 ± 75.33	0.000845818	0.0194667
POF1B	208.15 ± 72.60	165.20 ± 62.65	0.00257419	0.0355385
POLE	69.01 ± 6.83	60.02 ± 7.10	0.000779705	0.0186068
POLR3D	154.52 ± 18.69	194.99 ± 26.09	4.52249e-06	0.00209952
POP7	155.04 ± 10.99	169.67 ± 15.23	0.00470214	0.0497989
POTEE	11.54 ± 1.13	12.29 ± 1.54	0.00314963	0.0398091
PPA2	104.31 ± 7.15	114.80 ± 10.79	0.00200836	0.0311627
PPAP2A	167.36 ± 25.02	146.10 ± 31.54	0.00257733	0.0355444
PPAP2B	409.68 ± 77.04	334.33 ± 87.74	0.00050233	0.0147564
PPAP2C	674.22 ± 235.13	553.86 ± 206.67	0.000367734	0.01266
PPARGC1A	177.49 ± 53.30	139.91 ± 46.74	0.0046521	0.049616
PPIB	2276.29 ± 121.36	2571.74 ± 287.17	0.000758811	0.0183802
PPIC	953.89 ± 236.47	809.21 ± 263.55	0.000720347	0.0177961
PPIL6	72.84 ± 10.47	96.88 ± 20.87	0.000108278	0.00715431
PPM1K	142.00 ± 56.55	206.37 ± 69.46	1.61825e-05	0.00324414
PPP1CC	2742.80 ± 225.95	2554.85 ± 145.89	0.00239104	0.0340511
PPP1R15A	194.59 ± 36.19	309.26 ± 109.51	0.000193242	0.00924701
PPP2R5D	233.63 ± 19.58	212.09 ± 25.37	0.00294849	0.0381943
PPP3CC	276.53 ± 27.30	313.84 ± 43.55	0.00351537	0.0421509
PRC1	77.99 ± 22.68	61.58 ± 15.54	0.00329354	0.0409819
PRDM1	86.55 ± 26.34	65.36 ± 19.51	0.00315274	0.039821
PRDM10	74.27 ± 6.15	68.11 ± 4.12	0.000347417	0.0123122
PRDX1	2047.10 ± 249.61	1885.91 ± 291.76	0.00101199	0.0213279
PRDX4	694.57 ± 80.21	817.26 ± 113.59	0.00261834	0.0357948
PRG4	422.70 ± 319.59	754.77 ± 546.03	0.000734772	0.0180031
PRICKLE1	140.75 ± 42.93	106.42 ± 30.48	4.43251e-05	0.00490082
PRIM1	203.04 ± 27.62	174.89 ± 26.69	0.00280189	0.0371776
PRKAA1	882.87 ± 74.33	774.04 ± 112.26	0.00358482	0.0426812
PRKACB	785.87 ± 254.31	945.26 ± 271.80	0.00101352	0.0213397
PRKAR2B	262.52 ± 67.86	210.04 ± 56.51	0.00311981	0.0396081
PRKCD	220.63 ± 29.70	184.09 ± 27.72	1.98842e-06	0.00162038
PRKG2	22.39 ± 4.53	25.73 ± 7.20	0.00134578	0.0250512
PROM1	733.56 ± 336.53	586.30 ± 286.76	0.00161079	0.027667
PROM2	84.86 ± 10.11	72.92 ± 12.35	0.00209084	0.0317266
PRPH2	55.68 ± 16.59	64.86 ± 19.72	0.000422423	0.0134141
PRPS2	294.12 ± 68.42	262.25 ± 54.34	0.00106648	0.0219097
PRPSAP1	228.00 ± 28.99	213.18 ± 22.74	0.00453749	0.0489163
PRR11	40.56 ± 12.55	29.75 ± 8.22	0.000891024	0.0199845
PRRG1	167.15 ± 32.38	141.73 ± 26.10	0.000609604	0.0162841
PRRG4	191.17 ± 68.12	173.67 ± 66.13	0.00135332	0.0251404
PRRX1	143.81 ± 72.04	125.64 ± 69.34	0.000393724	0.0129297
PRSS23	341.04 ± 57.94	252.78 ± 44.39	6.77415e-06	0.0023185
PSG9	115.63 ± 37.35	91.59 ± 23.01	0.00194244	0.0306213
PSMA3	906.73 ± 117.46	984.06 ± 114.17	0.00334452	0.0412807
PSMA5	543.15 ± 50.24	590.09 ± 59.02	0.00115934	0.0229598
PSMC3IP	125.44 ± 19.41	109.09 ± 19.44	0.00311677	0.0396081
PSMD14	985.37 ± 95.98	1083.35 ± 136.19	0.00217732	0.0322091
PSMG1	285.51 ± 22.50	316.86 ± 25.94	0.000119556	0.00745011
PTCH1	119.97 ± 29.72	100.82 ± 19.99	0.00224352	0.032807
PTCHD2	80.43 ± 29.11	98.10 ± 37.81	0.00464545	0.0495691
PTDSS1	516.45 ± 68.77	444.52 ± 74.26	0.00214914	0.0319872
PTGFRN	433.55 ± 64.19	368.03 ± 76.25	4.93119e-05	0.00510717
PTK7	209.05 ± 33.58	193.51 ± 36.47	0.000506554	0.0148211
PTMA	4921.68 ± 569.45	4298.65 ± 516.11	1.98018e-06	0.00162038
PTPN18	116.61 ± 15.81	100.75 ± 9.98	0.00312902	0.0396352
PTPRB	36.08 ± 9.65	28.44 ± 9.05	0.00289364	0.0377938
PTPRF	327.66 ± 60.37	301.83 ± 56.11	0.00192821	0.0304999
PTPRG	109.83 ± 22.03	96.10 ± 17.05	0.00361019	0.042846
PTPRK	539.22 ± 128.28	468.15 ± 126.58	0.000801222	0.0188142
PTPRN	1125.88 ± 589.59	1265.95 ± 545.57	0.00445063	0.0483341
PTPRS	144.78 ± 8.74	122.52 ± 7.86	1.95612e-09	4.30395e-05
PTRH2	135.43 ± 14.77	155.90 ± 10.82	0.000144519	0.00805008
PUS7L	207.40 ± 46.65	257.87 ± 69.71	0.00147407	0.0263256
PXDN	319.54 ± 149.34	233.85 ± 91.93	0.000229382	0.0100654
PXMP2	229.52 ± 35.47	198.72 ± 29.25	0.00188487	0.0300956
PXMP4	101.93 ± 11.91	89.26 ± 8.04	0.000873326	0.0198627
RAB18	1679.23 ± 221.30	1844.88 ± 161.87	0.00223309	0.0327339
RAB2B	254.63 ± 40.50	289.32 ± 48.92	0.00243563	0.0343988
RAB30	97.98 ± 27.76	130.86 ± 43.95	0.000316438	0.0117808
RAB31	561.12 ± 109.67	472.32 ± 116.51	0.000535306	0.0153696
RAB39B	145.63 ± 57.19	188.51 ± 59.63	0.001875	0.029985
RAB3B	345.34 ± 149.45	524.37 ± 182.83	6.28306e-05	0.00549033
RAB4A	267.15 ± 31.04	232.47 ± 27.31	0.00359562	0.0427451
RAB5A	1519.03 ± 161.44	1688.59 ± 161.24	0.000386239	0.0128758
RAB7L1	500.63 ± 113.73	426.89 ± 87.69	0.0020652	0.0315377
RABL4	143.77 ± 9.91	157.48 ± 14.43	0.000616297	0.0163249
RACGAP1	130.43 ± 14.51	114.91 ± 15.57	0.000732316	0.017963
RAD18	137.01 ± 18.95	123.04 ± 16.69	0.00128157	0.0243084
RAD51AP1	26.68 ± 6.79	20.37 ± 6.61	0.000937961	0.020494
RAG1AP1	517.95 ± 48.89	634.56 ± 67.22	7.02144e-05	0.00574309
RALY	569.03 ± 85.68	517.42 ± 89.20	8.94455e-05	0.00641051
RAP1GAP	244.72 ± 44.46	199.67 ± 46.02	0.00013472	0.00775961
RAPGEFL1	33.01 ± 3.99	29.24 ± 4.40	0.00142944	0.0258319
RARB	83.38 ± 20.35	56.33 ± 26.66	0.000475743	0.0144779
RARRES3	86.61 ± 24.86	70.66 ± 11.66	0.00390977	0.0448185
RARS2	337.16 ± 35.98	381.85 ± 49.21	0.0018915	0.0301496
RASA3	92.32 ± 28.39	80.25 ± 27.85	0.00336269	0.0412877
RASD1	504.02 ± 92.48	614.15 ± 117.72	1.44739e-05	0.00312218
RASSF1	112.95 ± 14.25	138.88 ± 20.28	0.00135514	0.0251404
RBM47	1112.17 ± 121.31	990.73 ± 129.07	0.00361645	0.042846
RBMS3	65.57 ± 18.96	52.47 ± 13.73	0.000114019	0.00733538
RBPMS	315.84 ± 98.17	255.83 ± 78.12	7.14439e-05	0.00579002
RCAN1	374.31 ± 133.52	471.68 ± 245.25	0.00257829	0.0355444
RCBTB2	133.80 ± 38.41	110.08 ± 22.33	0.000623535	0.0164107
RCC2	372.90 ± 78.64	331.48 ± 75.13	0.000165855	0.00854547
RCN1	1175.07 ± 136.79	1305.29 ± 111.47	0.00426305	0.0471108
RCN2	760.58 ± 83.36	655.23 ± 120.16	0.00333548	0.0412807
RDBP	214.05 ± 22.33	246.87 ± 24.46	0.00054848	0.0154251
RDH10	414.56 ± 78.69	344.96 ± 75.77	0.000566718	0.0156846
RECK	131.57 ± 26.93	115.44 ± 25.94	0.00240241	0.0341026
REEP6	186.71 ± 59.15	156.65 ± 50.02	0.000673345	0.0171275
REM2	69.39 ± 11.33	90.99 ± 23.39	0.00126065	0.0239944
RERG	99.43 ± 34.45	70.80 ± 22.86	0.000389556	0.0128758
REST	315.77 ± 87.31	270.56 ± 85.39	0.00030491	0.0115033
RFTN1	68.56 ± 11.23	61.15 ± 8.75	0.00081233	0.0190141
RFTN2	51.98 ± 19.21	40.86 ± 25.69	0.00171177	0.0286864
RFX3	55.99 ± 12.43	68.15 ± 17.61	0.000993204	0.0210125
RFX6	559.29 ± 254.29	678.29 ± 295.28	0.000798015	0.0187991
RGL1	274.38 ± 70.47	223.47 ± 49.27	4.19587e-05	0.00480831
RGNEF	169.23 ± 31.98	151.34 ± 36.44	0.00290104	0.0378365
RGS16	139.33 ± 33.83	184.59 ± 42.00	0.000408194	0.0131799
RGS17	163.95 ± 30.79	204.94 ± 37.66	4.38807e-05	0.00487759
RGS22	44.11 ± 18.02	54.12 ± 20.47	5.90049e-05	0.00542661
RGS7	130.98 ± 56.50	167.64 ± 60.08	0.000381153	0.0128758
RGS9	513.12 ± 255.02	797.85 ± 338.91	4.10502e-05	0.00480719
RHCE	21.53 ± 2.50	26.75 ± 4.53	0.000133097	0.00773484
RHOJ	174.99 ± 78.96	122.56 ± 58.58	0.000201509	0.00947372
RHOQ	479.94 ± 51.30	575.93 ± 81.62	0.000502083	0.0147564
RHOU	192.51 ± 52.36	176.31 ± 50.57	0.00103431	0.0215648
RICS	179.28 ± 16.73	163.16 ± 16.37	0.000490927	0.0147092
RINT1	149.54 ± 14.16	179.34 ± 21.30	4.14259e-05	0.00480719
RIOK2	281.36 ± 40.18	307.50 ± 38.81	0.00405121	0.0458522
RIPPLY2	45.73 ± 9.47	55.75 ± 8.06	8.34239e-05	0.00619428
RNASEK	202.93 ± 41.51	229.96 ± 41.89	0.00111838	0.022534
RNASEL	217.88 ± 20.79	178.06 ± 21.49	6.451e-06	0.0023185
RNF145	346.38 ± 45.08	299.79 ± 28.03	0.00435919	0.0476705
RNF150	167.56 ± 39.96	222.40 ± 60.36	0.00035423	0.0124504
RNF185	24.23 ± 6.44	28.04 ± 7.96	0.00418206	0.0466305
RNPEP	670.95 ± 84.26	594.82 ± 86.54	0.000595169	0.0161073
RNU1A	829.92 ± 512.12	1189.21 ± 633.63	0.000324082	0.0119374
ROGDI	250.60 ± 18.94	217.77 ± 31.97	0.00187733	0.029997
RP11-345P4.4	153.18 ± 13.91	132.81 ± 16.62	0.00290013	0.0378365
RPL10	1295.40 ± 390.30	1449.95 ± 353.88	0.00209516	0.0317391
RPL10A	1246.69 ± 197.59	1371.25 ± 144.71	0.00227083	0.0330232
RPL13AP6	91.58 ± 16.25	103.28 ± 13.92	0.0037665	0.0439408
RPL17P18	1619.95 ± 178.50	1808.65 ± 135.35	0.000448909	0.0139721
RPL18A	532.39 ± 155.38	601.54 ± 127.46	0.00468202	0.0497663
RPL21	2832.91 ± 348.83	3205.51 ± 214.83	0.000412626	0.0132388
RPL21P20	121.21 ± 23.37	149.77 ± 22.62	0.00374592	0.0437607
RPL21P28	2645.34 ± 342.79	3038.19 ± 211.58	0.000461233	0.0141682
RPL21P93	132.15 ± 27.56	181.01 ± 31.85	0.000594422	0.0161069
RPL21P97	606.13 ± 126.63	802.11 ± 118.49	0.000662792	0.0169571
RPL24	3145.28 ± 364.12	3361.03 ± 351.16	0.000603817	0.0162216
RPL29P12	64.47 ± 12.23	75.78 ± 13.88	0.00299419	0.0385486
RPL29P31	30.82 ± 4.51	36.50 ± 6.16	0.00382265	0.0443758
RPL35P1	495.53 ± 125.38	594.39 ± 96.41	0.000491926	0.0147092
RPL36A	1028.55 ± 180.17	1128.59 ± 129.47	0.00329989	0.040997
RPL36AL	2386.22 ± 257.66	2731.65 ± 217.61	0.000126542	0.00764362
RPL36P14	260.56 ± 39.22	284.96 ± 50.71	0.00218253	0.0322091
RPL37A	138.85 ± 7.83	147.29 ± 12.98	0.00228456	0.0331133
RPL37AP8	95.43 ± 12.06	107.79 ± 6.42	0.000484125	0.0146519
RPL38	1817.18 ± 164.95	1927.51 ± 171.46	0.00453758	0.0489163
RPL39	1159.48 ± 234.82	1341.32 ± 205.80	3.81995e-05	0.00480719
RPL41	5182.74 ± 350.48	5429.46 ± 344.96	0.000427239	0.0135062
RPL7A	3163.55 ± 222.68	3404.19 ± 190.10	0.00469659	0.0497989
RPL7P48	72.41 ± 14.27	83.45 ± 16.73	0.00452234	0.0488717
RPL9	5492.86 ± 507.45	5806.86 ± 445.02	0.000505376	0.0148108
RPLP1P5	143.42 ± 24.65	166.86 ± 29.81	0.00348164	0.041926
RPN1	1618.03 ± 166.79	1827.56 ± 192.05	0.000205671	0.0095069
RPN2	2029.04 ± 150.47	2266.87 ± 243.78	0.00166399	0.0282718
RPS10	2078.29 ± 345.60	2201.00 ± 302.83	0.00139032	0.0254895
RPS10P13	100.83 ± 18.77	110.79 ± 16.12	0.00170931	0.0286864
RPS11P5	2749.85 ± 317.58	3062.56 ± 277.14	0.00170955	0.0286864
RPS12P4	90.93 ± 11.39	102.94 ± 10.99	0.00266383	0.036024
RPS13P2	58.51 ± 10.76	71.68 ± 10.73	0.00439982	0.0479621
RPS15AP11	222.02 ± 43.95	262.28 ± 60.63	0.000232091	0.0100654
RPS15AP17	17.54 ± 3.27	20.85 ± 4.12	0.00133357	0.024887
RPS17	3868.72 ± 407.76	4112.11 ± 298.11	0.000634936	0.0166312
RPS18P12	84.06 ± 16.74	96.35 ± 17.80	0.000926651	0.0203886
RPS18P5	1602.67 ± 356.28	1904.90 ± 473.93	7.85272e-06	0.00238556
RPS18P9	322.33 ± 59.25	372.76 ± 54.07	1.84002e-05	0.0034021
RPS20	3003.35 ± 426.73	3190.33 ± 389.38	0.00416819	0.0465574
RPS25	930.47 ± 116.94	1036.76 ± 134.88	0.00102194	0.0214144
RPS26P39	136.53 ± 31.33	163.59 ± 39.71	1.39075e-05	0.0030297
RPS27	2583.70 ± 383.80	2735.84 ± 297.29	0.00437965	0.0477992
RPS27AP17	5.57 ± 0.32	6.24 ± 0.41	0.00136448	0.0252834
RPS27P13	90.10 ± 18.59	106.72 ± 20.69	0.00355482	0.0423929
RPS3A	4071.38 ± 437.14	4571.52 ± 402.65	0.000437668	0.0137568
RPS6KA2	172.27 ± 31.81	154.61 ± 34.36	0.000511822	0.014896
RPS6P1	72.48 ± 7.85	80.80 ± 5.81	0.000141456	0.00793977
RPS7	507.02 ± 86.82	566.25 ± 86.63	6.71672e-05	0.00560879
RPS7P10	14.79 ± 1.80	16.35 ± 1.26	0.00172646	0.0287632
RPS8P4	38.28 ± 3.86	43.15 ± 4.57	0.00104227	0.0216548
RPSAP12	1289.49 ± 322.95	1520.11 ± 303.88	0.00195306	0.0307383
RPSAP15	176.68 ± 40.22	215.09 ± 42.88	0.000942447	0.0205106
RRM2	71.83 ± 23.67	51.80 ± 23.44	0.00151279	0.026668
RSAD2	101.42 ± 30.56	192.72 ± 76.91	0.000525519	0.0152141
RSPH4A	27.93 ± 6.12	40.36 ± 17.40	0.00200626	0.0311627
RTP4	89.68 ± 18.99	77.80 ± 15.15	0.00194415	0.0306213
RUFY1	563.43 ± 75.16	489.32 ± 79.14	0.00195516	0.0307495
RWDD2A	180.11 ± 28.75	212.53 ± 31.16	0.0014625	0.0261827
S100A10	4452.54 ± 899.51	4782.20 ± 913.25	2.55545e-05	0.00401692
S1PR3	119.52 ± 21.45	103.02 ± 14.09	0.00122475	0.0235907
SAMD3	139.40 ± 91.39	169.85 ± 79.47	0.000959568	0.0206786
SAMD5	234.08 ± 78.44	289.70 ± 105.42	6.97705e-05	0.00573893
SAMD9	154.90 ± 37.96	120.79 ± 31.51	0.000232044	0.0100654
SAMD9L	38.69 ± 10.76	29.13 ± 7.23	6.83946e-06	0.0023185
SC4MOL	1127.17 ± 187.62	1396.71 ± 231.15	0.00051018	0.0148876
SCAMP3	488.60 ± 31.24	529.83 ± 43.97	0.00234019	0.0335659
SCARB2	2120.73 ± 255.88	2297.28 ± 298.03	0.00097472	0.0208014
SCD	1812.79 ± 773.78	2700.26 ± 1055.30	9.74716e-06	0.00258202
SCD5	205.95 ± 57.25	158.99 ± 24.12	4.925e-05	0.00510717
SCFD1	366.29 ± 72.51	429.39 ± 67.24	0.00174188	0.0288936
SCG2	2169.41 ± 830.61	2755.62 ± 934.75	3.31377e-06	0.001996
SCGB2A1	219.66 ± 78.40	266.51 ± 96.96	0.00175204	0.0289467
SCN9A	99.28 ± 21.26	85.31 ± 18.15	0.0015326	0.0268799
SCNN1A	212.31 ± 79.80	160.76 ± 59.42	7.71334e-05	0.00591333
SCNN1G	88.06 ± 41.70	61.10 ± 15.47	0.000950102	0.0206084
SCPEP1	489.76 ± 93.65	438.97 ± 87.20	7.3005e-05	0.00581282
SCTR	141.36 ± 41.83	105.50 ± 38.35	0.000863582	0.0197105
SDC1	253.16 ± 53.27	220.65 ± 43.10	0.00108293	0.0221031
SDC4	1558.01 ± 675.53	1358.69 ± 578.77	0.00148288	0.0263511
SDF2L1	248.86 ± 43.71	352.99 ± 89.43	0.000108883	0.00717277
SDS	62.88 ± 20.33	54.43 ± 21.77	0.000871594	0.0198522
SEC11C	1907.01 ± 575.34	2254.27 ± 527.07	7.17023e-05	0.00579002
SEC13	374.23 ± 43.91	439.81 ± 72.18	0.000982734	0.0209116
SEC22B	1971.48 ± 362.68	2257.46 ± 373.16	0.000153699	0.00826836
SEC23B	1213.33 ± 222.81	1437.41 ± 249.37	2.57742e-05	0.00401692
SEC24A	276.33 ± 18.60	317.93 ± 32.98	0.000112102	0.00726451
SEC24D	598.86 ± 145.16	783.87 ± 179.07	5.16031e-06	0.00218346
SEC31A	1823.45 ± 291.83	1972.46 ± 260.32	0.00410902	0.0461743
SEC61A1	1311.17 ± 101.97	1529.26 ± 182.21	0.000500849	0.0147523
SEC61G	1051.68 ± 124.93	1308.75 ± 126.86	1.01837e-06	0.00162038
SELENBP1	257.06 ± 54.97	203.53 ± 43.15	0.000281177	0.011097
SELK	631.42 ± 68.43	794.28 ± 119.79	4.85433e-06	0.00209952
SELS	209.80 ± 15.24	271.81 ± 41.09	4.98571e-05	0.00510717
SEMA3F	103.60 ± 12.54	91.60 ± 11.64	0.00180347	0.0293131
SEMA6A	202.44 ± 59.26	158.95 ± 60.50	0.000301719	0.0114458
SEPHS1	445.54 ± 39.14	397.79 ± 44.25	0.00348518	0.041926
SEPP1	268.38 ± 53.92	207.74 ± 57.43	0.00113627	0.0227786
SEPT9	166.24 ± 42.87	141.24 ± 37.63	0.000423105	0.0134141
SERINC2	938.96 ± 377.03	816.19 ± 363.96	0.00209856	0.0317391
SERINC5	351.12 ± 82.85	287.05 ± 69.43	1.63059e-05	0.00324414
SERP1	840.51 ± 81.03	972.96 ± 103.62	0.000177687	0.00886519
SERPINA5	835.90 ± 372.16	472.74 ± 218.66	0.000286857	0.0111907
SERPINA6	269.46 ± 104.88	172.68 ± 86.16	0.000956559	0.020634
SERPINB8	177.02 ± 58.08	198.24 ± 51.91	0.00340887	0.0415764
SERPING1	865.51 ± 339.24	735.23 ± 328.93	0.00322448	0.0403794
SERPINH1	445.14 ± 176.66	388.92 ± 145.24	0.000496855	0.0147092
SERPINI1	331.85 ± 177.14	377.53 ± 179.73	0.00037912	0.0128758
SERTAD4	25.63 ± 3.82	29.54 ± 5.70	0.00459057	0.0491743
SESTD1	560.26 ± 62.87	490.71 ± 80.93	0.00149708	0.0264786
SETMAR	95.23 ± 10.06	79.72 ± 9.09	0.000489461	0.0147092
SEZ6L2	297.22 ± 84.35	327.88 ± 89.17	0.000277423	0.0109784
SF3B5	492.31 ± 68.62	584.07 ± 52.59	0.00151505	0.026668
SFRP2	266.21 ± 114.30	200.75 ± 99.02	0.000954155	0.0206193
SFRP5	310.16 ± 129.86	231.72 ± 67.54	0.00224326	0.032807
SGIP1	54.49 ± 11.60	68.13 ± 18.41	0.00197225	0.0309338
SGK1	158.01 ± 51.69	115.46 ± 42.31	0.00291065	0.0379168
SGMS2	475.33 ± 80.72	711.39 ± 194.68	9.06713e-06	0.00248169
SGOL1	10.29 ± 2.14	8.45 ± 1.67	0.000157568	0.00835394
SGOL2	24.17 ± 3.53	21.26 ± 3.45	0.00345514	0.0418876
SGSM3	147.92 ± 14.77	168.51 ± 20.29	0.00169544	0.0286074
SH2D4A	174.46 ± 54.68	144.44 ± 48.73	5.13932e-05	0.00512299
SH3BP5	84.63 ± 11.46	100.31 ± 20.42	0.00318069	0.0400591
SHCBP1	71.46 ± 38.49	44.04 ± 27.79	0.000163322	0.00849524
SHFM1	1366.32 ± 59.91	1493.22 ± 63.59	1.55068e-05	0.00324414
SHMT1	68.59 ± 16.04	57.27 ± 15.48	0.00402041	0.0455739
SHMT2	548.68 ± 125.66	624.53 ± 134.40	0.00258198	0.0355517
SHROOM3	163.32 ± 38.15	132.94 ± 31.20	0.000828157	0.019221
SIAE	602.17 ± 95.46	512.46 ± 108.32	0.00142458	0.0258319
SIK1	183.57 ± 20.67	199.19 ± 26.25	0.00244254	0.0344142
SIL1	409.80 ± 111.61	566.18 ± 163.19	9.23509e-05	0.00645371
SKP2	157.92 ± 17.72	138.04 ± 16.55	0.00339968	0.0415501
SLC10A7	143.75 ± 10.47	177.20 ± 28.23	0.000389743	0.0128758
SLC12A1	13.36 ± 1.59	15.96 ± 2.39	0.00149649	0.0264786
SLC12A2	528.66 ± 127.49	436.95 ± 122.26	0.00112975	0.0227213
SLC12A6	137.55 ± 15.73	125.47 ± 11.99	0.00261397	0.0357948
SLC15A1	251.99 ± 103.32	189.88 ± 93.00	0.000598605	0.0161407
SLC16A1	127.67 ± 42.26	110.06 ± 44.01	0.00183542	0.0296069
SLC16A5	75.51 ± 21.17	64.13 ± 13.92	0.00269679	0.0363134
SLC16A7	411.43 ± 151.16	333.31 ± 142.06	0.00160909	0.0276651
SLC17A4	60.03 ± 25.39	39.83 ± 15.00	0.00171899	0.0287194
SLC17A6	366.78 ± 233.47	489.01 ± 299.75	0.00216593	0.0321348
SLC18A2	259.92 ± 109.79	421.26 ± 215.61	2.82129e-05	0.00413837
SLC19A3	171.74 ± 77.84	111.27 ± 58.57	0.000204555	0.00949521
SLC20A1	290.24 ± 40.70	251.30 ± 49.82	0.00179564	0.0292861
SLC20A2	419.09 ± 55.71	352.15 ± 44.18	4.73651e-06	0.00209952
SLC22A17	683.00 ± 256.67	825.25 ± 318.36	0.000960676	0.0206823
SLC24A6	106.19 ± 23.84	91.11 ± 21.57	9.0623e-05	0.00645285
SLC25A22	208.73 ± 19.16	236.87 ± 23.33	3.95217e-05	0.00480719
SLC25A3	1366.61 ± 119.28	1266.83 ± 109.05	0.00212703	0.0318584
SLC25A34	96.13 ± 38.57	70.17 ± 17.18	0.000221872	0.00992222
SLC25A37	209.42 ± 76.88	165.51 ± 71.36	0.00259627	0.0356979
SLC25A5	1399.80 ± 116.02	1268.53 ± 177.27	0.000579041	0.0158464
SLC26A6	80.31 ± 11.56	69.42 ± 7.34	0.00216066	0.032083
SLC27A2	154.65 ± 50.23	193.46 ± 67.89	0.00180389	0.0293131
SLC30A10	32.20 ± 7.14	26.79 ± 6.78	0.000161682	0.00844989
SLC36A1	99.26 ± 14.16	84.59 ± 12.70	0.000895603	0.0199903
SLC36A4	673.66 ± 166.31	858.91 ± 197.03	8.68958e-07	0.00162038
SLC39A10	493.41 ± 107.97	421.86 ± 100.20	0.00341867	0.0416593
SLC39A7	1162.94 ± 168.31	1392.80 ± 213.01	0.000384848	0.0128758
SLC3A1	335.50 ± 148.85	235.43 ± 146.91	0.000579049	0.0158464
SLC3A2	1562.34 ± 316.96	1857.41 ± 350.42	0.00417109	0.0465624
SLC40A1	1246.12 ± 325.78	1003.93 ± 271.39	0.00087768	0.0198773
SLC44A2	417.00 ± 114.36	332.00 ± 109.90	0.000178459	0.00888357
SLC44A4	1182.92 ± 353.10	890.28 ± 273.90	0.000403695	0.0131007
SLC45A3	112.55 ± 34.12	134.56 ± 55.02	0.00252432	0.0350352
SLC46A3	267.04 ± 69.44	217.66 ± 61.26	0.00425992	0.0471
SLC4A4	1161.24 ± 367.86	799.30 ± 349.13	0.000266091	0.0107425
SLC5A2	158.25 ± 16.61	181.79 ± 27.76	0.0010327	0.0215648
SLC5A4	42.92 ± 23.45	72.04 ± 38.78	0.000148767	0.00814238
SLC6A20	94.23 ± 25.39	80.28 ± 19.77	0.00145152	0.0261137
SLC7A1	431.42 ± 52.43	523.97 ± 83.70	0.0046452	0.0495691
SLC7A14	167.10 ± 65.65	212.26 ± 87.29	0.00111475	0.0225022
SLC7A5	403.33 ± 132.03	699.18 ± 267.24	8.99225e-06	0.00248169
SLC7A7	67.09 ± 20.41	59.04 ± 18.72	0.00358375	0.0426812
SLC9A3R1	955.64 ± 159.35	827.95 ± 159.51	0.00105614	0.0217823
SLCO2A1	61.37 ± 14.02	44.37 ± 5.98	0.000271078	0.0108839
SLCO5A1	109.01 ± 27.73	155.63 ± 46.36	1.22196e-06	0.00162038
SLFN13	47.96 ± 11.45	36.54 ± 7.45	1.67811e-05	0.00324414
SLMO2	1477.08 ± 205.57	1631.33 ± 198.62	0.000906801	0.0201331
SLPI	907.44 ± 341.01	740.64 ± 395.10	0.00432504	0.0474372
SMAD3	364.35 ± 161.73	312.49 ± 168.80	0.000218395	0.0098066
SMAD7	111.67 ± 15.70	93.47 ± 13.15	0.000330645	0.0120226
SMARCB1	289.07 ± 13.96	266.95 ± 26.64	0.00398299	0.0452431
SMARCD3	111.51 ± 15.59	101.67 ± 17.27	0.00436746	0.0476898
SMC2	129.62 ± 23.75	106.95 ± 22.42	0.000459646	0.0141644
SMN1	469.16 ± 70.39	524.98 ± 46.94	0.000826247	0.0191969
SMOC1	388.74 ± 128.10	557.60 ± 219.67	0.00160942	0.0276651
SMPDL3A	243.89 ± 68.08	280.09 ± 65.43	0.00173631	0.0288762
SNAI2	288.44 ± 102.67	189.06 ± 85.53	3.46421e-06	0.001996
SNAP25	313.18 ± 147.83	408.26 ± 183.45	0.000577663	0.0158464
SNED1	80.03 ± 10.49	90.47 ± 11.76	0.00465577	0.0496311
SNHG12	171.64 ± 75.09	264.95 ± 123.20	0.000545133	0.0154251
SNORD101	34.18 ± 8.80	41.83 ± 13.37	0.00172691	0.0287632
SNORD74	146.68 ± 56.62	220.65 ± 118.51	6.15471e-05	0.00549033
SNORD75	74.75 ± 25.89	103.61 ± 53.56	0.00431564	0.0473785
SNRPD2	341.83 ± 44.48	368.90 ± 46.61	0.00252669	0.0350352
SNRPG	301.70 ± 39.11	366.57 ± 52.66	0.000186723	0.00916241
SNTB2	177.26 ± 25.93	155.87 ± 21.84	0.0001268	0.00764362
SOAT1	733.74 ± 75.23	631.04 ± 84.51	0.00038802	0.0128758
SOCS5	334.98 ± 39.99	300.83 ± 37.49	0.00291409	0.0379393
SORD	568.26 ± 184.69	456.19 ± 162.50	0.00404925	0.0458522
SOX4	433.96 ± 142.34	380.51 ± 127.82	4.51058e-05	0.00493752
SP1	272.40 ± 32.85	245.85 ± 37.16	0.00281496	0.0372437
SPARC	1460.73 ± 561.68	1153.02 ± 492.58	0.000286431	0.0111907
SPATA17	41.27 ± 7.84	66.53 ± 23.40	0.000112613	0.00726618
SPCS2	1701.31 ± 159.60	1900.60 ± 160.33	0.000188908	0.00921607
SPIN1	948.79 ± 85.39	835.11 ± 101.19	0.000778531	0.0186054
SPON2	175.66 ± 53.89	140.92 ± 43.91	5.96704e-06	0.00230333
SPRED1	237.98 ± 47.04	204.23 ± 44.73	0.00267516	0.0361549
SPTBN1	1485.38 ± 287.76	1316.75 ± 335.40	0.00283331	0.0373696
SPTLC3	102.25 ± 25.57	86.82 ± 24.36	0.00280249	0.0371776
SRA1	175.01 ± 31.52	207.47 ± 31.83	0.00295898	0.038252
SRGAP1	118.29 ± 36.67	92.04 ± 23.56	0.000254162	0.010492
SRP54	1073.38 ± 122.76	1196.27 ± 137.88	0.000333613	0.0120531
SRP68	1010.05 ± 81.74	1140.64 ± 105.76	0.000171493	0.00866668
SRP72	984.82 ± 114.66	1165.59 ± 153.04	2.67137e-06	0.00183678
SRPR	1658.00 ± 264.85	1943.82 ± 292.73	0.00022733	0.0100298
SRPRB	690.12 ± 117.91	856.57 ± 137.22	7.38468e-05	0.00581282
SRPX	92.44 ± 38.12	75.26 ± 36.79	2.15755e-05	0.00367996
SRPX2	252.27 ± 135.41	203.37 ± 129.30	0.00056574	0.0156846
SRrp35	82.53 ± 14.40	94.18 ± 14.55	0.00332895	0.0412807
SSBP2	1211.10 ± 277.26	1358.47 ± 339.37	0.00129185	0.0244327
SSH1	79.77 ± 8.78	70.83 ± 7.76	0.00194423	0.0306213
SSH3	99.15 ± 16.67	87.93 ± 15.26	0.00357317	0.0425887
SSPN	118.90 ± 11.93	109.35 ± 21.13	0.00458058	0.0491066
SSR1	3249.88 ± 497.83	3579.78 ± 530.58	0.00135469	0.0251404
SSR2	2935.57 ± 198.21	3375.47 ± 295.27	0.000601285	0.0161931
SSR3	925.94 ± 130.05	1101.55 ± 150.70	0.000420112	0.013377
SSRP1	465.08 ± 56.43	436.56 ± 48.74	0.00407481	0.0460319
ST6GALNAC1	56.78 ± 11.39	46.80 ± 9.79	0.00287916	0.0376627
STAM2	444.07 ± 43.27	487.78 ± 37.03	0.00461667	0.0493876
STAT1	855.98 ± 96.56	780.19 ± 125.39	0.00336254	0.0412877
STAT4	123.72 ± 41.31	140.99 ± 45.86	0.000996957	0.0210716
STAT6	339.40 ± 75.45	295.80 ± 63.17	0.00113501	0.0227786
STAU1	682.30 ± 81.28	646.00 ± 87.47	0.00364964	0.0430478
STBD1	95.13 ± 19.32	114.01 ± 18.99	0.00453672	0.0489163
STC2	68.12 ± 20.99	99.33 ± 24.89	4.6699e-05	0.00503193
STEAP3	118.45 ± 22.73	107.64 ± 18.81	0.00049431	0.0147092
STIL	33.34 ± 5.58	26.98 ± 3.66	5.40377e-06	0.00220178
STK17B	286.75 ± 59.29	252.38 ± 62.50	0.0021584	0.032083
STK19	142.22 ± 11.36	165.28 ± 18.64	0.00199213	0.0310643
STK24	513.36 ± 69.51	470.11 ± 71.61	0.000439573	0.013797
STK38	267.49 ± 39.88	220.27 ± 37.95	0.000197135	0.00930787
STK40	228.64 ± 18.39	273.25 ± 32.38	7.43647e-05	0.00581282
STMN1	293.62 ± 31.57	256.79 ± 43.78	0.00172028	0.0287194
STOM	509.72 ± 105.42	448.45 ± 109.01	0.000679121	0.0172346
STS	120.35 ± 26.00	92.51 ± 21.00	7.92029e-05	0.00598853
STX5	249.43 ± 22.16	278.61 ± 21.44	4.17304e-05	0.00480719
STYXL1	188.28 ± 37.27	215.45 ± 28.81	0.00104744	0.0216804
SUCLG2	648.95 ± 107.60	590.43 ± 120.25	0.000204358	0.00949521
SUCNR1	31.18 ± 29.30	43.25 ± 40.01	0.000747235	0.0182442
SUMO3	514.07 ± 29.12	457.41 ± 53.82	0.0021072	0.0317391
SUPT3H	62.45 ± 12.33	75.93 ± 14.70	0.00175691	0.0289467
SURF4	3025.39 ± 995.45	3619.43 ± 1021.09	3.49585e-05	0.00466166
SVIL	190.88 ± 52.15	170.81 ± 52.44	0.000893786	0.0199903
SYP	464.39 ± 206.06	604.00 ± 241.40	0.00021649	0.00980106
SYT13	907.49 ± 461.05	1087.37 ± 494.94	0.00182988	0.0296043
SYT4	1927.58 ± 866.96	2275.44 ± 807.48	0.000669472	0.0170675
SYT5	160.91 ± 52.07	188.99 ± 68.27	0.00411112	0.0461743
SYVN1	153.06 ± 17.24	176.05 ± 20.94	0.00390517	0.0448185
TACC1	658.88 ± 97.40	567.56 ± 88.26	0.000377417	0.0128758
TAF15	1056.76 ± 99.39	946.65 ± 86.62	0.00142905	0.0258319
TAF1D	274.42 ± 89.43	403.82 ± 184.86	0.000117506	0.0074081
TAGAP	31.18 ± 2.69	27.64 ± 2.75	0.00393271	0.0449173
TAPBP	897.55 ± 174.16	758.89 ± 117.77	7.32894e-06	0.00238556
TAT	30.47 ± 6.63	37.59 ± 6.28	0.00092377	0.020366
TAX1BP3	669.53 ± 163.25	531.72 ± 134.02	4.68831e-05	0.00503193
TBC1D14	412.50 ± 53.65	357.84 ± 48.98	0.000251341	0.0104342
TBL2	273.86 ± 21.57	342.35 ± 40.07	4.715e-05	0.00503601
TBXAS1	117.66 ± 33.16	95.23 ± 27.21	0.00133879	0.0249633
TCEAL2	406.13 ± 150.38	503.66 ± 156.09	0.000168678	0.00859108
TCEAL5	66.84 ± 20.76	85.60 ± 32.11	7.82249e-05	0.00595551
TCEAL6	570.57 ± 156.31	678.27 ± 152.96	6.6886e-05	0.00560879
TCF7L2	215.09 ± 30.89	181.67 ± 28.22	0.000190566	0.00924701
TCIRG1	136.65 ± 29.03	120.44 ± 29.16	0.000593095	0.0161069
TCN1	509.60 ± 242.33	365.56 ± 239.22	0.00416117	0.0465574
TCP11L2	267.23 ± 45.03	307.66 ± 28.54	0.00273571	0.0366134
TEAD2	179.13 ± 49.14	151.28 ± 50.19	0.00192662	0.0304967
TEAD3	117.50 ± 13.55	105.57 ± 12.55	0.0019715	0.0309338
TEX2	321.68 ± 44.37	284.74 ± 29.05	0.00173973	0.0288894
TF	26.79 ± 4.17	31.26 ± 4.39	0.00247914	0.0347214
TFDP2	319.31 ± 39.23	283.03 ± 48.21	0.00359601	0.0427451
TFPI2	1082.43 ± 502.66	814.45 ± 423.57	0.000192402	0.00924701
TGFB1I1	128.62 ± 18.43	115.39 ± 15.41	0.00274409	0.0366587
TGFBI	713.90 ± 422.60	526.14 ± 319.61	0.00170672	0.0286864
TGFBR2	267.53 ± 55.87	238.68 ± 53.68	0.000386231	0.0128758
THY1	170.90 ± 95.18	123.16 ± 65.42	0.00011866	0.00742491
TICAM2	470.57 ± 61.31	518.31 ± 56.21	0.00269507	0.0363125
TIMM17A	512.88 ± 66.91	599.08 ± 77.47	2.20779e-06	0.00173489
TIMM9	108.13 ± 9.62	126.34 ± 14.57	0.00204035	0.0313354
TIMP1	7819.37 ± 1400.98	6694.52 ± 1831.39	0.000306011	0.0115094
TIMP2	1719.43 ± 264.30	1446.85 ± 257.18	5.17431e-05	0.00512299
TIMP3	422.21 ± 249.98	302.42 ± 187.97	8.04823e-06	0.00238556
TIPRL	441.71 ± 44.33	493.48 ± 43.33	0.000839018	0.0193709
TJP3	134.03 ± 18.52	112.69 ± 13.07	7.91641e-06	0.00238556
TLL1	38.08 ± 10.82	33.55 ± 8.86	0.00352877	0.0422426
TLL2	46.34 ± 6.22	59.40 ± 14.44	0.00342162	0.0416593
TLN2	41.30 ± 2.73	36.93 ± 2.50	0.000915841	0.0202317
TLR3	237.34 ± 87.92	173.17 ± 73.56	8.38948e-05	0.00619428
TM4SF20	119.99 ± 118.52	35.87 ± 21.44	4.43631e-06	0.00209952
TM4SF4	4704.14 ± 1740.20	4067.15 ± 1735.90	0.00396995	0.0451826
TMBIM1	2105.94 ± 496.22	1920.23 ± 466.00	0.00380591	0.0442666
TMC5	512.25 ± 193.44	391.32 ± 184.94	0.000107555	0.00712794
TMED10P	316.76 ± 43.42	384.65 ± 46.37	0.000531528	0.0153276
TMED5	752.19 ± 72.17	866.50 ± 89.04	0.000212555	0.00975896
TMEM126A	233.69 ± 35.48	262.55 ± 42.32	0.00217872	0.0322091
TMEM127	494.93 ± 61.59	457.75 ± 52.02	0.000436383	0.0137361
TMEM139	149.96 ± 50.75	125.19 ± 41.09	0.00141467	0.0257668
TMEM140	215.71 ± 73.31	181.54 ± 53.35	0.00217368	0.0322063
TMEM144	237.59 ± 76.98	189.31 ± 54.96	9.60322e-05	0.00660957
TMEM14A	490.25 ± 57.08	420.24 ± 60.20	0.000617458	0.0163289
TMEM154	47.72 ± 12.54	88.59 ± 35.62	1.7033e-05	0.00324896
TMEM167B	901.38 ± 65.73	989.42 ± 85.39	0.00122683	0.0235907
TMEM181	740.88 ± 74.58	645.08 ± 70.29	0.0006965	0.017514
TMEM185B	237.38 ± 25.61	210.51 ± 26.57	0.000615864	0.0163249
TMEM19	307.00 ± 46.05	254.29 ± 45.75	0.00142934	0.0258319
TMEM196	148.47 ± 67.06	169.08 ± 64.23	0.00372487	0.0437101
TMEM200A	113.35 ± 61.94	176.01 ± 78.62	6.73862e-06	0.0023185
TMEM203	254.29 ± 19.17	233.43 ± 23.56	0.00354442	0.042318
TMEM204	126.62 ± 28.30	113.91 ± 19.58	0.00429191	0.0472636
TMEM208	389.40 ± 42.69	483.69 ± 72.84	0.00109089	0.0222039
TMEM214	486.04 ± 51.75	561.18 ± 81.14	0.00389587	0.0448185
TMEM216	132.36 ± 17.88	155.65 ± 16.03	0.0007872	0.0187045
TMEM22	138.36 ± 33.93	169.55 ± 35.15	0.000704922	0.0176432
TMEM26	22.66 ± 3.91	19.97 ± 2.25	0.000918194	0.0202634
TMEM37	313.46 ± 73.60	229.74 ± 75.07	0.000203624	0.00949521
TMEM39A	389.29 ± 64.18	496.01 ± 88.36	0.000202867	0.00949521
TMEM41A	571.75 ± 169.78	489.83 ± 132.46	0.00333243	0.0412807
TMEM41B	213.11 ± 26.03	240.79 ± 18.46	8.21704e-05	0.00614951
TMEM45A	274.64 ± 112.91	373.11 ± 173.04	0.00261603	0.0357948
TMEM48	269.91 ± 36.19	235.54 ± 30.22	0.00440111	0.0479621
TMEM49	2401.38 ± 173.00	2538.40 ± 165.19	0.00295736	0.038252
TMEM50A	1417.30 ± 186.13	1230.51 ± 171.27	1.00837e-05	0.00258202
TMEM54	434.01 ± 93.46	355.01 ± 71.43	0.000225639	0.00998917
TMEM63A	359.49 ± 146.44	279.72 ± 116.34	0.000894334	0.0199903
TMEM70	231.72 ± 20.54	263.10 ± 33.13	0.00138936	0.0254895
TMEM86A	103.20 ± 17.53	90.43 ± 17.83	0.00228422	0.0331133
TMOD1	2078.13 ± 639.90	2443.49 ± 673.66	3.60931e-05	0.00475532
TMPO	301.61 ± 48.30	256.23 ± 44.06	0.00457058	0.0490667
TMPRSS2	357.12 ± 180.87	282.99 ± 139.58	0.0018214	0.0295106
TMPRSS4	103.34 ± 72.99	63.73 ± 32.68	0.00286836	0.0375621
TMPRSS6	52.40 ± 5.64	59.25 ± 7.06	7.58101e-05	0.00589403
TMUB1	172.78 ± 18.35	191.83 ± 17.44	0.00258522	0.0355731
TNFRSF1A	415.03 ± 41.18	373.59 ± 37.53	0.00168816	0.0285502
TNFSF10	1232.47 ± 447.63	950.98 ± 384.31	0.00124126	0.0237693
TNFSF15	76.11 ± 18.51	64.09 ± 16.85	0.00221155	0.0325047
TOP2A	76.98 ± 35.89	47.37 ± 31.30	4.49323e-05	0.00493752
TOX	181.64 ± 69.00	216.55 ± 78.38	0.00227555	0.0330699
TP53I3	277.03 ± 71.51	249.95 ± 67.90	0.00110761	0.0223785
TP53INP1	426.36 ± 122.20	378.32 ± 101.16	0.00440946	0.0480293
TPH1	35.39 ± 14.38	44.96 ± 22.87	0.00455077	0.0490104
TPM2	182.24 ± 53.02	145.85 ± 48.03	0.000156583	0.00832177
TPMT	275.34 ± 32.42	301.42 ± 31.37	0.00186084	0.029973
TPPP3	142.95 ± 43.99	195.07 ± 104.64	0.000295872	0.0113723
TPX2	50.40 ± 17.01	35.68 ± 16.23	0.000411916	0.0132388
TRA2B	1066.50 ± 73.91	1158.46 ± 84.51	0.000488296	0.0147092
TRAM2	124.44 ± 25.52	110.56 ± 15.02	0.00273922	0.036638
TRAPPC4	1128.77 ± 235.33	1222.05 ± 194.98	0.00226017	0.0329701
TRERF1	85.70 ± 23.76	71.12 ± 20.86	0.00216098	0.032083
TRIB3	121.32 ± 21.55	200.34 ± 48.94	6.5439e-05	0.00555916
TRIM13	199.08 ± 25.94	169.90 ± 24.16	0.00382144	0.0443758
TRIM22	161.78 ± 53.39	122.02 ± 42.70	0.000138004	0.00784295
TRIM27	245.16 ± 15.89	279.68 ± 26.54	0.00346229	0.0419026
TRIM32	215.75 ± 18.11	198.50 ± 30.00	0.00361813	0.042846
TRIM9	84.73 ± 24.17	101.56 ± 21.36	0.00420675	0.0467615
TRIP13	49.21 ± 14.50	40.99 ± 10.89	0.00246638	0.0345867
TRIT1	263.79 ± 40.90	293.45 ± 31.87	0.00421349	0.0467615
TRPV6	221.18 ± 108.33	170.74 ± 80.72	0.000230191	0.0100654
TSGA14	110.64 ± 26.85	123.32 ± 31.10	0.00338615	0.0414633
TSPAN14	297.23 ± 65.07	263.31 ± 64.04	9.15156e-05	0.00645371
TSPAN15	693.89 ± 213.47	580.74 ± 205.50	0.000140037	0.00788022
TSPAN33	148.04 ± 26.72	136.55 ± 27.48	0.00329288	0.0409819
TSPAN6	458.89 ± 126.86	373.29 ± 140.08	0.000412764	0.0132388
TSPAN8	1740.37 ± 604.89	989.20 ± 548.59	0.000345905	0.0123122
TSPYL2	187.58 ± 55.27	260.39 ± 69.75	0.000139791	0.00788022
TTC15	113.51 ± 14.35	128.70 ± 15.16	0.000993091	0.0210125
TTC25	52.54 ± 10.05	63.35 ± 19.95	0.00115725	0.0229598
TTC39B	197.70 ± 32.27	229.94 ± 34.03	0.00218816	0.0322279
TTK	15.70 ± 4.94	12.19 ± 7.02	0.0020145	0.0311703
TTLL12	231.11 ± 39.04	210.83 ± 31.54	0.00104418	0.0216616
TTYH3	164.40 ± 32.12	148.56 ± 36.90	0.00467419	0.0497607
TUBA4A	819.93 ± 129.04	908.57 ± 121.84	0.00260389	0.0357406
TUBA4B	66.13 ± 6.41	72.92 ± 6.71	0.0035447	0.042318
TUBA8	55.98 ± 7.23	65.85 ± 8.06	0.0027181	0.0364443
TUBB4	106.09 ± 13.27	122.32 ± 21.75	0.00229543	0.0331834
TUBE1	89.84 ± 19.67	104.02 ± 15.80	0.00454132	0.0489326
TXNDC11	576.57 ± 129.49	701.26 ± 161.77	9.18057e-05	0.00645371
TXNDC15	567.34 ± 119.04	661.64 ± 120.97	5.6101e-06	0.00224429
TXNL4A	502.39 ± 72.24	586.21 ± 83.05	3.05871e-05	0.0042701
TYMS	83.01 ± 27.80	56.07 ± 15.16	0.000337729	0.0121818
TYW1	135.23 ± 16.28	158.45 ± 10.35	0.00236142	0.0337229
UACA	122.85 ± 27.61	94.31 ± 19.40	0.00192081	0.0304267
UAP1	375.95 ± 52.64	417.31 ± 47.90	0.00154796	0.0270739
UBA7	120.14 ± 25.08	100.97 ± 19.64	6.65e-05	0.005606
UBASH3B	109.44 ± 48.57	98.14 ± 40.86	0.00354689	0.0423213
UBC	9053.00 ± 404.55	9679.26 ± 423.49	0.000301015	0.0114388
UBD	345.51 ± 178.27	258.87 ± 142.43	0.00334973	0.0412807
UBE2A	369.83 ± 29.60	424.33 ± 45.96	0.000416059	0.0132864
UBE2C	79.54 ± 12.12	64.52 ± 11.37	4.83039e-07	0.0015183
UBE2D3P	974.66 ± 120.25	1162.82 ± 93.84	0.000667885	0.0170675
UBE2J1	465.96 ± 50.84	519.49 ± 52.26	0.00179117	0.0292795
UBE2MP1	330.57 ± 30.53	385.86 ± 57.31	0.000492102	0.0147092
UBE2Z	734.07 ± 67.34	779.61 ± 68.66	0.00416438	0.0465574
UBFD1	295.42 ± 31.19	326.85 ± 26.90	0.00145428	0.0261182
UCA1	449.25 ± 178.74	228.63 ± 153.52	1.82782e-05	0.0034021
UCHL1	1140.65 ± 415.73	1444.61 ± 421.58	4.98024e-05	0.00510717
UCHL3	904.38 ± 54.57	1054.21 ± 96.75	1.03269e-05	0.00258202
UCK1	428.51 ± 34.94	393.73 ± 23.46	0.000874301	0.0198627
UCN3	169.47 ± 56.90	210.50 ± 84.60	0.00456716	0.0490667
UFM1	1058.43 ± 117.06	1295.82 ± 142.98	0.000115087	0.00736108
UFSP2	147.35 ± 18.38	175.83 ± 26.00	0.00288498	0.0377165
UGT1A1	115.72 ± 50.36	90.85 ± 45.40	0.000485521	0.0146689
UGT2A3	312.03 ± 123.48	211.34 ± 108.74	0.000320996	0.0118901
UGT2B15	2339.77 ± 1324.17	1458.77 ± 1328.98	0.000941618	0.0205106
UGT2B7	2820.44 ± 1716.60	1696.77 ± 1528.00	0.000593258	0.0161069
UNC13A	220.73 ± 100.83	284.96 ± 113.41	0.000937018	0.020494
UNC84B	225.58 ± 29.05	208.62 ± 33.21	0.000796464	0.0187826
UNG	140.69 ± 14.21	130.35 ± 18.12	0.0013223	0.0247489
UQCRH	758.39 ± 61.00	834.64 ± 77.79	6.16597e-05	0.00549033
USMG5	1382.87 ± 125.12	1562.15 ± 143.16	5.2823e-05	0.00517573
USO1	1579.82 ± 149.70	1795.48 ± 165.69	2.39484e-05	0.00391731
UXT	421.22 ± 36.86	492.81 ± 41.29	3.40425e-05	0.00459521
VAC14	134.09 ± 9.66	119.32 ± 12.92	0.000578958	0.0158464
VANGL1	87.90 ± 21.35	78.72 ± 19.03	0.00364949	0.0430478
VAPA	616.12 ± 57.52	558.93 ± 43.14	0.0036569	0.043079
VARS	156.91 ± 14.95	182.96 ± 28.98	0.000648805	0.0167748
VAT1	791.06 ± 85.52	744.71 ± 64.07	0.000441031	0.0138231
VAT1L	294.51 ± 125.52	391.94 ± 133.65	0.000315609	0.0117698
VCAN	249.12 ± 185.64	183.06 ± 214.04	0.00074387	0.0182034
VCL	192.63 ± 24.40	171.67 ± 21.38	0.0015555	0.0271626
VGF	591.04 ± 212.63	841.17 ± 257.44	6.29409e-05	0.00549033
VIM	574.94 ± 184.45	717.35 ± 159.29	0.00079201	0.0187177
VNN1	169.29 ± 66.00	138.98 ± 75.56	0.00266186	0.0360194
VNN2	228.29 ± 120.28	138.71 ± 74.91	0.00265213	0.0360107
VPS37C	149.46 ± 7.34	167.22 ± 11.29	0.000342337	0.0123076
VPS41	1600.32 ± 234.31	1409.50 ± 201.12	0.000414203	0.0132464
VRK1	240.66 ± 26.31	208.13 ± 35.77	0.00157799	0.0273599
VSTM2L	124.85 ± 13.86	140.76 ± 20.32	0.0013921	0.0254895
VTCN1	552.88 ± 233.41	428.58 ± 241.88	0.00119388	0.0234539
WARS	536.69 ± 124.32	678.05 ± 165.80	0.00079934	0.0188101
WDR46	213.28 ± 26.65	238.89 ± 23.61	0.00457384	0.0490667
WDR63	27.42 ± 8.51	35.74 ± 13.73	0.000893441	0.0199903
WDR72	99.57 ± 43.11	63.83 ± 44.12	0.000795506	0.0187802
WIPI1	509.49 ± 103.86	594.91 ± 78.37	0.00252702	0.0350352
WNT5A	267.44 ± 139.04	186.61 ± 105.50	0.000263328	0.0106639
WSCD2	126.76 ± 51.70	83.90 ± 19.00	0.000196013	0.00928956
WWP1	595.27 ± 68.31	543.83 ± 84.72	0.00149657	0.0264786
WWP2	133.83 ± 19.68	120.92 ± 19.94	0.000925629	0.0203865
WWTR1	320.13 ± 103.63	265.77 ± 99.50	0.000728732	0.0179338
XBP1	3005.32 ± 395.12	3549.42 ± 590.90	0.00335509	0.0412807
YARS	493.45 ± 72.62	579.44 ± 100.35	0.00103499	0.0215648
YIF1A	410.26 ± 65.01	478.23 ± 105.04	0.00197695	0.0309338
YIPF2	262.32 ± 54.56	321.98 ± 79.76	0.000786863	0.0187045
YIPF6	843.13 ± 152.95	931.76 ± 153.11	0.00359387	0.0427451
YME1L1	2611.36 ± 202.01	2872.05 ± 193.62	4.86652e-06	0.00209952
YPEL1	57.69 ± 13.89	47.56 ± 8.90	0.000166119	0.00854547
YRDC	416.20 ± 29.25	493.53 ± 53.71	0.00131362	0.0246401
YWHAH	1205.21 ± 138.37	1357.31 ± 188.94	0.0015332	0.0268799
ZADH2	253.93 ± 32.05	221.12 ± 29.50	0.000948533	0.0206023
ZBTB38	1315.73 ± 218.99	1143.59 ± 190.26	0.000152898	0.00824904
ZBTB4	176.35 ± 18.56	166.93 ± 19.39	0.00365739	0.043079
ZC3H12C	209.75 ± 38.36	253.02 ± 49.61	0.00444504	0.0483062
ZCCHC7	126.88 ± 7.91	139.43 ± 11.12	0.00264412	0.0360008
ZDHHC3	243.98 ± 27.60	218.34 ± 32.10	0.00036664	0.01266
ZFAND1	765.68 ± 76.66	877.25 ± 66.81	0.000161555	0.00844989
ZFAND2A	174.80 ± 30.39	222.07 ± 45.44	0.00122531	0.0235907
ZFP106	401.64 ± 43.56	357.19 ± 24.95	0.00219186	0.0322585
ZFP36L2	260.17 ± 48.51	235.48 ± 31.74	0.00378082	0.0440379
ZFYVE9	125.86 ± 28.90	144.34 ± 30.44	0.00114732	0.0228985
ZIK1	96.82 ± 8.08	86.29 ± 8.41	0.00370938	0.0435749
ZMIZ1	204.44 ± 22.05	183.30 ± 21.34	0.00207436	0.0315419
ZMYM5	55.87 ± 4.93	64.51 ± 5.96	0.000557069	0.0154955
ZNF135	107.18 ± 13.18	93.59 ± 11.53	0.00252948	0.0350471
ZNF165	107.70 ± 22.14	189.83 ± 66.11	4.39521e-06	0.00209952
ZNF217	379.59 ± 114.68	341.58 ± 120.07	0.00211498	0.031786
ZNF331	194.54 ± 41.37	260.04 ± 85.97	0.000146779	0.00807377
ZNF395	278.09 ± 80.62	351.19 ± 127.85	0.00217261	0.0322063
ZNF410	279.33 ± 26.82	316.67 ± 31.86	0.000193745	0.00924701
ZNF436	157.22 ± 23.11	137.46 ± 18.70	0.0022178	0.0325478
ZNF503	124.41 ± 17.53	108.41 ± 15.11	0.00100034	0.0211025
ZNF559	202.95 ± 22.77	189.98 ± 22.00	0.00142688	0.0258319
ZNF593	106.49 ± 14.65	117.62 ± 11.76	0.00349345	0.0419566
ZNF624	69.64 ± 6.69	59.67 ± 7.52	0.0030438	0.0390048
ZNF673	153.74 ± 23.86	178.01 ± 23.60	0.000482832	0.0146329
ZNF674	48.53 ± 9.25	55.67 ± 9.79	0.00432923	0.0474372
ZNF704	112.68 ± 39.97	92.95 ± 30.07	3.8263e-05	0.00480719
ZNF827	133.43 ± 18.45	118.96 ± 18.59	0.00207281	0.0315419
ZNF90	750.02 ± 140.35	834.66 ± 139.72	7.76391e-05	0.00593144
ZRANB2	609.54 ± 87.27	714.59 ± 82.08	0.00345533	0.0418876
ZSCAN2	71.70 ± 5.30	64.66 ± 5.38	0.0025073	0.0348968
ZSWIM6	356.46 ± 67.15	316.14 ± 67.81	5.88135e-05	0.00542661
