# Supplementary material for: Glucolipotoxicity Alters Insulin Secretion via Epigenetic Changes in Human Islets
Source: Oxford University Press journal article supplement (doi:10.2337/db18-0900), 2019-08-16
Supplement: db180900supplementarydata4.xlsx [file db180900supplementarydata4.xlsx]

## Sheet: expression_analyzed_all_3
Supplementary Table 3. Genes that are differentially expressed after exposure to both high levels of glucose and high levels of glucose + palmitate
		Glucotoxicity (Hall et al, Mol Cell Endocrinol, 2017 Nov 26. pii: S0303-7207(17)30605-6.)				Glucolipotoxicity
Probe Set ID	Gene Symbol	Control (mean ± SD)	High glucose (mean ± SD )	p-value	q-value	Control (mean ± SD)	High glucose and palmitate (mean ± SD)	p-value	q-value
8013112	RASD1	499.35 ± 90.55	647.24 ± 150.54	6.99982e-08	0.00197299	504.02 ± 92.48	614.15 ± 117.72	1.44739e-05	0.00312218
8115355	GLRA1	265.47 ± 185.22	165.43 ± 105.05	1.90977e-06	0.0190311	261.77 ± 192.25	129.45 ± 67.43	1.28246e-05	0.00293931
8002421	VAC14	134.34 ± 9.32	120.31 ± 6.69	2.02557e-06	0.0190311	134.09 ± 9.66	119.32 ± 12.92	0.000579	0.0158464
8151223	SLCO5A1	109.71 ± 26.77	145.65 ± 43.34	6.4307e-06	0.044166	109.01 ± 27.73	155.63 ± 46.36	1.22196e-06	0.00162038
7953450	LEPREL2	90.33 ± 17.14	102.01 ± 19.02	1.24743e-05	0.044166	90.17 ± 17.83	104.97 ± 17.81	3.82197e-05	0.00480719
7985213	CHRNA5	320.46 ± 271.80	595.55 ± 430.74	1.25355e-05	0.044166	321.83 ± 282.85	659.51 ± 497.50	6.99027e-05	0.00573893
