# Supplementary material for: Glucolipotoxicity Alters Insulin Secretion via Epigenetic Changes in Human Islets
Source: Oxford University Press journal article supplement (doi:10.2337/db18-0900), 2019-08-16
Supplement: db180900supplementarydata5.xlsx [file db180900supplementarydata5.xlsx]

## Sheet: Expression_lg_vs_hgp
Supplementary Table 4. Genes that are differentially expressed after exposure to both high levels of palmitate and high levels of glucose + palmitate
	Lipotoxicity (Hall et al, BMC Med, 2014 Jun 23;12:103. doi: 10.1186/1741-7015-12-103)				Glucolipotoxicity
Gene symbol	Control (mean ± sd)	High palmitate (mean ± sd)	p-value	q-value	Control (mean ± SD)	High glucose and palmitate (mean ± SD)	p-value	q-value
ABCD3	1.915.1 ± 216.9	1.688.9 ± 229.0	0.00024	0.0133	1915.06 ± 216.88	1725.52 ± 230.95	0.00311698	0.0396081
ABHD2	1.119.7 ± 194.0	892.7 ± 109.7	0.00024	0.0133	1119.73 ± 193.96	930.40 ± 130.46	0.000612448	0.0162943
ACE2	95.8 ± 43.5	49.5 ± 15.1	0.00024	0.0133	95.75 ± 43.50	52.40 ± 15.22	9.86806e-05	0.00672204
ACO1	1.279.2 ± 125.5	1.138.3 ± 80.2	0.00122	0.0267	1279.16 ± 125.46	1152.43 ± 134.41	0.0033511	0.0412807
ACP5	226.2 ± 96.9	180.4 ± 64.1	0.00073	0.0204	226.16 ± 96.91	163.09 ± 57.95	0.00121259	0.0235688
ACSF2	75.7 ± 25.5	61.7 ± 24.6	0.00171	0.0326	75.68 ± 25.48	61.85 ± 23.75	0.00136746	0.025299
ACSL1	720.6 ± 155.0	918.6 ± 247.0	0.00024	0.0133	720.57 ± 155.02	923.34 ± 230.32	0.000299045	0.0114034
ACSS2	235.6 ± 51.8	192.8 ± 44.5	0.00049	0.0169	235.58 ± 51.75	194.23 ± 50.01	0.00252339	0.0350352
ACSS3	141.6 ± 57.9	105.4 ± 44.3	0.00024	0.0133	141.62 ± 57.88	106.96 ± 49.69	0.000789526	0.018714
ACTN4	2.694.2 ± 513.4	2.483.8 ± 477.6	0.00122	0.0267	2694.21 ± 513.38	2437.06 ± 428.44	0.00286894	0.0375621
ACTR2	3.136.7 ± 199.1	2.859.3 ± 213.1	0.00024	0.0133	3136.71 ± 199.09	2843.47 ± 223.75	0.00156508	0.027265
ACVR1B	287.8 ± 35.3	251.1 ± 34.5	0.00049	0.0169	287.77 ± 35.30	258.46 ± 35.91	0.00244955	0.0344165
ADAM10	1.938.4 ± 239.3	1.720.9 ± 162.3	0.00024	0.0133	1938.37 ± 239.31	1753.42 ± 198.71	0.000249807	0.0104336
ADAM19	46.1 ± 8.8	38.4 ± 4.8	0.00171	0.0326	46.08 ± 8.77	39.24 ± 5.07	0.000498993	0.014737
ADAM28	96.6 ± 48.4	66.5 ± 28.9	0.00024	0.0133	96.64 ± 48.37	69.29 ± 27.84	0.00164862	0.02808
ADAM9	3.380.2 ± 593.6	2.896.2 ± 573.8	0.00024	0.0133	3380.18 ± 593.57	2984.52 ± 665.67	0.00228893	0.0331323
ADAMTS12	163.0 ± 84.2	108.9 ± 40.9	0.00024	0.0133	163.02 ± 84.24	114.85 ± 63.67	1.38786e-07	0.00101788
ADAMTS5	42.9 ± 8.1	51.6 ± 12.0	0.00122	0.0267	42.93 ± 8.13	63.48 ± 18.42	4.88677e-05	0.00510717
ADCY2	75.6 ± 10.1	116.1 ± 31.0	0.00024	0.0133	75.59 ± 10.11	113.58 ± 29.67	0.000608049	0.0162757
ADCYAP1	511.8 ± 274.8	620.4 ± 225.8	0.00342	0.0489	511.77 ± 274.77	775.02 ± 301.69	1.63748e-05	0.00324414
ADD3	417.9 ± 57.4	337.1 ± 51.4	0.00024	0.0133	417.87 ± 57.37	344.84 ± 70.23	0.000773869	0.0185407
ADFP	392.4 ± 200.1	762.9 ± 577.3	0.00024	0.0133	392.38 ± 200.12	655.56 ± 435.38	3.13453e-05	0.00431047
ADH1A	50.9 ± 24.1	27.1 ± 12.0	0.00024	0.0133	50.95 ± 24.14	28.20 ± 12.23	0.000473563	0.0144335
ADH1C	823.8 ± 533.6	305.9 ± 233.7	0.00024	0.0133	823.76 ± 533.64	330.86 ± 231.88	0.000256812	0.0105295
ADH6	16.1 ± 2.6	13.4 ± 2.4	0.00342	0.0489	16.14 ± 2.58	14.08 ± 1.75	0.00347693	0.0419184
ADI1	269.4 ± 55.2	204.0 ± 41.3	0.00024	0.0133	269.35 ± 55.20	211.94 ± 42.29	6.04905e-05	0.00545468
AEN	166.5 ± 8.5	195.4 ± 22.0	0.00244	0.0405	166.45 ± 8.46	197.83 ± 33.14	0.00209375	0.0317391
AFMID	121.0 ± 31.7	99.6 ± 28.7	0.00122	0.0267	121.00 ± 31.75	104.65 ± 25.49	0.000774409	0.0185407
AGR3	33.7 ± 14.2	24.3 ± 12.7	0.00122	0.0267	33.68 ± 14.23	23.62 ± 9.55	0.000105613	0.00704165
AHR	708.9 ± 174.4	605.3 ± 156.9	0.00024	0.0133	708.86 ± 174.45	618.27 ± 163.26	0.00016721	0.00854547
AKR1C3	3.642.9 ± 894.2	2.875.4 ± 903.0	0.00073	0.0204	3642.92 ± 894.24	3033.88 ± 983.23	0.00451522	0.0488188
ALDH1A3	624.8 ± 244.8	396.3 ± 203.3	0.00024	0.0133	624.79 ± 244.78	388.83 ± 176.91	5.35714e-06	0.00220178
ALDH2	576.7 ± 111.4	471.0 ± 81.0	0.00024	0.0133	576.68 ± 111.41	481.86 ± 84.13	0.000971184	0.0207603
ALDH7A1	598.4 ± 53.9	509.0 ± 96.2	0.00073	0.0204	598.43 ± 53.89	526.27 ± 67.52	0.000555877	0.0154844
AMBP	707.2 ± 453.2	481.4 ± 333.4	0.00073	0.0204	707.19 ± 453.20	488.05 ± 310.23	0.000980383	0.0208818
AMY1A	755.4 ± 1.014.4	597.6 ± 910.0	0.00073	0.0204	755.38 ± 1014.38	557.85 ± 837.09	0.00265489	0.0360107
AMY2A	1.065.8 ± 1.454.3	842.5 ± 1.305.8	0.00024	0.0133	1065.78 ± 1454.28	778.94 ± 1183.61	0.00286899	0.0375621
ANGPTL4	176.2 ± 109.0	270.4 ± 181.2	0.00122	0.0267	176.22 ± 108.99	221.34 ± 125.44	0.000611045	0.0162841
ANKRD13A	455.6 ± 68.8	386.4 ± 73.2	0.00024	0.0133	455.60 ± 68.80	367.64 ± 64.81	4.94786e-05	0.00510717
ANKRD37	110.2 ± 43.6	140.9 ± 49.9	0.00122	0.0267	110.17 ± 43.64	136.92 ± 41.31	0.000281886	0.011097
ANLN	61.1 ± 25.0	31.8 ± 11.0	0.00024	0.0133	61.10 ± 25.02	34.09 ± 17.97	8.38693e-06	0.00238556
ANO10	497.6 ± 62.9	576.4 ± 81.1	0.00342	0.0489	497.64 ± 62.94	644.42 ± 117.72	4.14242e-05	0.00480719
ANPEP	698.8 ± 353.2	545.5 ± 343.0	0.00122	0.0267	698.84 ± 353.20	518.65 ± 292.86	0.00120144	0.0235105
ANTXR1	214.1 ± 99.9	167.6 ± 67.5	0.00049	0.0169	214.06 ± 99.92	186.87 ± 82.83	0.00374564	0.0437607
ANTXR2	140.3 ± 32.6	112.5 ± 34.5	0.00244	0.0405	140.28 ± 32.58	114.51 ± 39.57	0.00196365	0.0308609
ANXA4	4.765.6 ± 1.166.0	3.359.7 ± 1.244.1	0.00024	0.0133	4765.58 ± 1165.98	3577.82 ± 1376.34	0.00104881	0.0216885
ANXA9	212.8 ± 100.3	137.0 ± 75.4	0.00024	0.0133	212.83 ± 100.28	143.66 ± 76.36	7.59188e-06	0.00238556
APP	4.817.9 ± 272.4	4.515.4 ± 286.5	0.00024	0.0133	4817.94 ± 272.40	4393.76 ± 251.45	1.32078e-05	0.00296535
ARG2	331.4 ± 163.6	436.4 ± 198.9	0.00171	0.0326	331.36 ± 163.57	564.74 ± 231.14	2.93015e-06	0.00195366
ARHGAP11A	81.4 ± 24.7	58.5 ± 17.8	0.00073	0.0204	81.39 ± 24.71	60.75 ± 15.70	0.00162036	0.0277664
ARHGAP26	164.9 ± 32.5	135.4 ± 32.8	0.00024	0.0133	164.87 ± 32.46	135.22 ± 25.06	2.79984e-05	0.00413837
ARHGEF3	394.8 ± 100.2	328.5 ± 99.9	0.00244	0.0405	394.81 ± 100.17	303.08 ± 61.27	0.000100125	0.00679926
ARID5B	408.8 ± 52.4	495.3 ± 86.6	0.00244	0.0405	408.84 ± 52.37	536.44 ± 100.05	0.000131714	0.00773484
ARL6IP1	4.582.0 ± 610.2	4.119.8 ± 360.1	0.00171	0.0326	4582.02 ± 610.19	4141.46 ± 313.96	0.000553096	0.0154844
ARMET	1.246.9 ± 105.9	1.521.7 ± 128.4	0.00024	0.0133	1246.93 ± 105.87	1606.15 ± 226.46	7.70179e-05	0.00591333
ARRB1	165.2 ± 21.6	140.2 ± 21.3	0.00049	0.0169	165.19 ± 21.65	140.85 ± 20.47	0.000809694	0.0189726
ASAH1	2.772.5 ± 351.5	2.517.6 ± 434.2	0.00171	0.0326	2772.52 ± 351.49	2497.83 ± 361.23	0.00083473	0.0192929
ASB9	174.5 ± 99.1	96.7 ± 52.8	0.00024	0.0133	174.49 ± 99.09	102.10 ± 52.54	0.00201361	0.0311703
ASH2L	939.7 ± 85.1	861.8 ± 93.0	0.00122	0.0267	939.71 ± 85.13	857.93 ± 91.92	0.0046917	0.049797
ASNS	565.6 ± 97.8	706.1 ± 188.1	0.00244	0.0405	565.57 ± 97.85	702.72 ± 198.36	0.00458202	0.0491066
ASPHD1	107.5 ± 16.8	124.9 ± 22.5	0.00024	0.0133	107.54 ± 16.79	129.14 ± 23.56	0.000366438	0.01266
ASRGL1	290.9 ± 40.8	232.2 ± 32.9	0.00073	0.0204	290.89 ± 40.80	241.18 ± 37.99	0.00226389	0.0329848
ASS1	646.0 ± 215.8	500.8 ± 167.4	0.00171	0.0326	646.03 ± 215.81	463.17 ± 108.81	4.59367e-05	0.00497892
ATAD4	93.9 ± 34.0	60.0 ± 28.2	0.00024	0.0133	93.89 ± 33.95	64.48 ± 25.37	0.000256225	0.0105295
ATF3	67.7 ± 16.3	112.6 ± 41.9	0.00024	0.0133	67.72 ± 16.33	108.32 ± 37.61	0.000158277	0.00837136
ATG2B	330.8 ± 46.4	278.6 ± 38.0	0.00024	0.0133	330.83 ± 46.43	290.16 ± 30.07	0.00297619	0.0384293
ATP10B	240.0 ± 113.5	187.1 ± 106.4	0.00024	0.0133	240.00 ± 113.49	187.49 ± 94.32	1.89207e-06	0.00162038
ATP11A	184.9 ± 37.8	153.7 ± 35.7	0.00171	0.0326	184.88 ± 37.83	155.30 ± 30.46	0.00262328	0.0358278
ATP11C	95.6 ± 24.0	80.0 ± 18.0	0.00049	0.0169	95.57 ± 24.02	84.14 ± 19.43	0.00333725	0.0412807
ATP13A4	95.7 ± 35.0	74.7 ± 31.0	0.00024	0.0133	95.71 ± 34.97	79.25 ± 33.59	0.00124656	0.0238292
ATP1A1	4.681.5 ± 695.3	3.899.0 ± 685.4	0.00024	0.0133	4681.48 ± 695.34	3941.93 ± 726.68	5.18366e-05	0.00512299
ATP6V0E1	2.813.3 ± 160.9	2.687.0 ± 180.6	0.00342	0.0489	2813.28 ± 160.85	2656.17 ± 191.27	0.0043011	0.0472938
ATP8B1	660.2 ± 207.1	496.4 ± 178.6	0.00024	0.0133	660.21 ± 207.12	504.93 ± 185.89	2.6585e-05	0.00409047
B3GALT5	65.6 ± 18.5	45.9 ± 7.2	0.00024	0.0133	65.64 ± 18.49	49.53 ± 9.41	0.00413635	0.04641
B4GALT5	639.7 ± 143.1	531.3 ± 168.9	0.00073	0.0204	639.74 ± 143.11	522.67 ± 170.95	6.39188e-05	0.00549033
BARD1	84.5 ± 25.9	68.5 ± 20.7	0.00244	0.0405	84.48 ± 25.92	69.51 ± 21.38	0.000550516	0.0154499
BBS2	477.7 ± 118.4	421.0 ± 103.7	0.00024	0.0133	477.74 ± 118.37	408.28 ± 79.46	0.000642162	0.0167514
BCL2L15	169.9 ± 63.6	116.6 ± 41.8	0.00024	0.0133	169.89 ± 63.63	126.78 ± 47.12	0.00174919	0.0289373
BCR	92.0 ± 8.7	84.7 ± 9.6	0.00342	0.0489	92.05 ± 8.68	85.95 ± 10.21	0.000362672	0.0126061
BDKRB2	147.3 ± 33.5	123.6 ± 25.2	0.00049	0.0169	147.34 ± 33.52	127.91 ± 41.52	0.000540484	0.0154051
BEST1	33.0 ± 2.9	43.4 ± 10.1	0.00122	0.0267	33.00 ± 2.88	46.03 ± 11.50	0.00102043	0.0214122
BET1L	156.7 ± 15.4	182.5 ± 19.6	0.00024	0.0133	156.66 ± 15.41	179.72 ± 13.89	0.000449062	0.0139721
BEX5	231.7 ± 49.2	280.2 ± 63.0	0.00122	0.0267	231.74 ± 49.24	301.95 ± 64.31	0.000222905	0.00994822
BGN	472.3 ± 232.4	374.8 ± 151.2	0.00171	0.0326	472.35 ± 232.43	370.26 ± 181.68	4.99053e-05	0.00510717
BICC1	464.7 ± 189.0	351.0 ± 149.7	0.00024	0.0133	464.74 ± 188.96	375.66 ± 169.00	6.59451e-05	0.00558061
BMF	126.6 ± 27.3	104.1 ± 13.6	0.00122	0.0267	126.61 ± 27.33	100.73 ± 24.19	5.38025e-05	0.00519206
BPIL2	72.9 ± 47.8	206.0 ± 159.0	0.00024	0.0133	72.94 ± 47.84	200.29 ± 156.92	0.000243555	0.0103538
BRD3	216.0 ± 11.8	199.7 ± 12.6	0.00122	0.0267	215.99 ± 11.75	196.40 ± 16.01	0.000583959	0.0159411
BRI3BP	247.9 ± 34.0	222.2 ± 37.3	0.00342	0.0489	247.88 ± 33.97	217.80 ± 20.32	0.0023146	0.0333729
BTG3	624.4 ± 128.5	695.0 ± 101.1	0.00342	0.0489	624.38 ± 128.47	709.27 ± 83.83	0.00298999	0.0385397
C10orf26	234.3 ± 37.5	204.5 ± 27.2	0.00244	0.0405	234.27 ± 37.49	200.17 ± 41.01	1.02183e-05	0.00258202
C11orf10	1.374.1 ± 212.5	1.622.1 ± 246.5	0.00049	0.0169	1374.06 ± 212.50	1666.34 ± 314.11	0.000238596	0.0102333
C12orf48	11.3 ± 1.6	8.9 ± 1.3	0.00073	0.0204	11.33 ± 1.63	9.28 ± 2.77	0.000555968	0.0154844
C14orf1	711.0 ± 76.2	634.9 ± 50.6	0.00073	0.0204	710.96 ± 76.17	630.20 ± 44.84	0.00163141	0.0278689
C14orf159	135.8 ± 28.2	119.3 ± 28.9	0.00342	0.0489	135.83 ± 28.18	117.01 ± 28.05	0.000954939	0.0206193
C15orf24	900.8 ± 102.7	943.5 ± 99.0	0.00342	0.0489	900.80 ± 102.65	990.54 ± 98.61	0.000348651	0.0123122
C17orf45	1.580.9 ± 156.5	1.787.0 ± 218.8	0.00049	0.0169	1580.86 ± 156.46	1782.33 ± 241.39	3.97098e-05	0.00480719
C19orf10	791.9 ± 86.6	981.6 ± 106.6	0.00024	0.0133	791.93 ± 86.57	1012.39 ± 152.68	0.000112232	0.00726451
C19orf30	485.6 ± 172.6	742.8 ± 235.8	0.00024	0.0133	485.64 ± 172.64	698.98 ± 206.46	2.3572e-05	0.0039159
C1orf43	1.613.2 ± 89.0	1.834.2 ± 144.8	0.00049	0.0169	1613.15 ± 89.04	1812.12 ± 133.43	3.58929e-05	0.00475532
C1QB	84.1 ± 22.2	66.9 ± 16.2	0.00171	0.0326	84.15 ± 22.16	67.12 ± 11.51	0.00387679	0.0447999
C20orf199	512.3 ± 138.3	659.0 ± 177.7	0.00024	0.0133	512.34 ± 138.34	631.47 ± 172.32	0.000878115	0.0198773
C20orf26	36.7 ± 9.4	45.4 ± 16.6	0.00342	0.0489	36.71 ± 9.36	51.87 ± 17.18	0.000300866	0.0114388
C22orf13	302.3 ± 50.9	281.7 ± 48.4	0.00073	0.0204	302.33 ± 50.89	278.90 ± 48.56	0.00130851	0.0245863
C22orf42	189.5 ± 84.5	234.9 ± 104.0	0.00244	0.0405	189.50 ± 84.49	252.88 ± 115.81	0.00316793	0.0399441
C2orf52	26.4 ± 3.3	33.9 ± 8.2	0.00171	0.0326	26.43 ± 3.32	32.18 ± 5.99	0.00469791	0.0497989
C3orf59	291.0 ± 55.6	256.7 ± 51.9	0.00049	0.0169	291.04 ± 55.60	262.10 ± 42.68	0.00123974	0.0237608
C4orf18	139.6 ± 48.3	93.4 ± 30.1	0.00073	0.0204	139.58 ± 48.27	97.46 ± 39.68	8.43356e-05	0.006206
C5orf13	300.1 ± 91.9	209.8 ± 55.8	0.00049	0.0169	300.14 ± 91.95	210.97 ± 60.60	4.78479e-05	0.00508586
C6	79.3 ± 40.1	53.0 ± 40.8	0.00024	0.0133	79.29 ± 40.08	61.44 ± 45.09	0.00267705	0.0361582
C6orf129	58.6 ± 9.0	74.8 ± 9.3	0.00024	0.0133	58.59 ± 9.03	72.85 ± 16.08	0.000496991	0.0147092
C6orf27	116.3 ± 24.8	145.1 ± 33.3	0.00049	0.0169	116.27 ± 24.82	140.33 ± 31.89	3.85295e-05	0.00480719
C7orf29	78.1 ± 22.4	59.7 ± 11.5	0.00122	0.0267	78.10 ± 22.40	61.56 ± 17.11	0.000616566	0.0163249
C8orf47	164.1 ± 26.1	139.5 ± 17.8	0.00171	0.0326	164.05 ± 26.07	142.12 ± 16.17	0.00159513	0.0275054
C9orf25	98.0 ± 8.8	111.5 ± 11.2	0.00024	0.0133	98.01 ± 8.80	110.84 ± 11.05	0.000305327	0.0115033
C9orf5	965.6 ± 74.8	840.0 ± 62.4	0.00024	0.0133	965.61 ± 74.75	850.15 ± 92.96	0.00230963	0.0333449
CA2	212.9 ± 61.8	162.4 ± 58.9	0.00073	0.0204	212.94 ± 61.78	165.59 ± 62.07	0.0022163	0.0325478
CAMK2N1	1.134.0 ± 260.3	1.030.1 ± 237.0	0.00024	0.0133	1133.99 ± 260.25	1015.55 ± 203.37	0.00033113	0.0120226
CAP1	2.501.3 ± 226.4	2.400.8 ± 201.6	0.00122	0.0267	2501.28 ± 226.39	2355.35 ± 248.31	0.00113673	0.0227786
CAPN6	119.0 ± 35.2	100.6 ± 36.8	0.00122	0.0267	119.02 ± 35.19	104.74 ± 36.89	0.00340804	0.0415764
CAPRIN1	1.904.8 ± 115.3	1.720.8 ± 128.4	0.00024	0.0133	1904.79 ± 115.28	1715.54 ± 107.20	0.00059764	0.0161345
CARD6	111.2 ± 35.4	80.2 ± 26.2	0.00024	0.0133	111.22 ± 35.42	85.28 ± 30.22	2.80466e-05	0.00413837
CARS	321.5 ± 39.5	371.7 ± 47.0	0.00122	0.0267	321.47 ± 39.48	377.56 ± 49.63	0.000698169	0.0175359
CASC5	22.3 ± 4.2	16.4 ± 2.2	0.00024	0.0133	22.34 ± 4.20	17.30 ± 4.55	0.000592265	0.0161069
CASP1	62.0 ± 22.2	44.0 ± 13.9	0.00244	0.0405	62.01 ± 22.18	50.11 ± 24.12	0.00152925	0.0268534
CASP5	29.7 ± 13.3	20.2 ± 8.0	0.00122	0.0267	29.75 ± 13.33	21.36 ± 9.65	0.00155534	0.0271626
CASP6	288.9 ± 54.8	239.8 ± 56.4	0.00024	0.0133	288.86 ± 54.76	248.92 ± 55.78	0.000621832	0.0163855
CAT	425.0 ± 44.8	383.0 ± 33.3	0.00024	0.0133	424.96 ± 44.85	385.77 ± 47.92	0.00327098	0.0408455
CAV2	713.6 ± 235.7	574.2 ± 228.2	0.00122	0.0267	713.57 ± 235.74	599.06 ± 249.34	0.0013925	0.0254895
CCDC102B	79.8 ± 30.1	52.5 ± 23.8	0.00122	0.0267	79.82 ± 30.09	55.67 ± 27.92	4.31769e-05	0.0048763
CCDC72	607.8 ± 52.1	659.2 ± 62.1	0.00171	0.0326	607.78 ± 52.13	679.20 ± 65.00	0.000397442	0.0129744
CCDC9	123.0 ± 12.4	145.1 ± 17.1	0.00024	0.0133	123.04 ± 12.40	135.90 ± 14.36	0.00343567	0.0417413
CCNA2	89.1 ± 21.8	61.6 ± 11.4	0.00024	0.0133	89.09 ± 21.84	63.50 ± 24.53	0.000247032	0.0104075
CCNB1	163.6 ± 38.1	114.4 ± 21.3	0.00024	0.0133	163.59 ± 38.11	121.15 ± 42.25	0.000100432	0.00679926
CCNB2	40.5 ± 14.1	25.5 ± 10.5	0.00122	0.0267	40.49 ± 14.10	25.04 ± 12.84	0.000106902	0.00710607
CCRL1	167.3 ± 74.5	106.8 ± 48.8	0.00024	0.0133	167.32 ± 74.47	127.32 ± 74.38	0.00186764	0.029985
CD163	48.1 ± 14.9	33.7 ± 12.0	0.00024	0.0133	48.10 ± 14.94	36.88 ± 14.54	0.000800583	0.0188142
CD248	134.2 ± 74.8	85.7 ± 24.8	0.00049	0.0169	134.21 ± 74.77	90.24 ± 53.16	4.05758e-07	0.0015183
CD53	159.1 ± 53.3	117.2 ± 39.7	0.00073	0.0204	159.15 ± 53.28	119.51 ± 45.50	0.00169681	0.0286084
CD59	4.179.1 ± 675.5	3.465.6 ± 421.3	0.00024	0.0133	4179.08 ± 675.48	3504.89 ± 610.05	8.374e-05	0.00619428
CD74	391.7 ± 124.7	312.1 ± 126.2	0.00122	0.0267	391.67 ± 124.74	311.44 ± 110.01	8.83638e-05	0.00637451
CDK1	24.7 ± 7.6	14.6 ± 3.7	0.00122	0.0267	24.71 ± 7.62	16.86 ± 5.78	0.000367386	0.01266
CDC26	189.6 ± 23.3	218.7 ± 22.1	0.00049	0.0169	189.58 ± 23.27	228.00 ± 32.30	0.000253719	0.010492
CDC40	506.3 ± 57.3	468.4 ± 57.6	0.00244	0.0405	506.27 ± 57.33	453.23 ± 40.26	0.00162269	0.0277846
CDH1	1.866.7 ± 218.8	1.711.5 ± 245.2	0.00122	0.0267	1866.72 ± 218.85	1669.39 ± 215.56	0.000344151	0.0123114
CDH11	279.1 ± 131.7	201.3 ± 83.9	0.00049	0.0169	279.05 ± 131.68	207.47 ± 115.09	2.44758e-05	0.00393087
CDH17	225.0 ± 162.3	98.4 ± 45.2	0.00024	0.0133	225.02 ± 162.33	99.99 ± 51.82	0.000544592	0.0154251
CDH3	123.6 ± 40.1	93.3 ± 30.2	0.00049	0.0169	123.56 ± 40.10	96.93 ± 32.01	0.00193611	0.0305809
CDH6	271.1 ± 103.5	187.1 ± 65.0	0.00122	0.0267	271.14 ± 103.46	200.09 ± 89.77	0.000292034	0.0112728
CDKN1A	241.8 ± 56.2	309.6 ± 72.3	0.00049	0.0169	241.77 ± 56.22	314.00 ± 56.77	0.000126286	0.00764362
CEACAM5	494.3 ± 245.3	217.7 ± 98.5	0.00049	0.0169	494.32 ± 245.27	241.51 ± 116.70	1.69981e-06	0.00162038
CEACAM6	2.503.1 ± 1.246.7	1.269.6 ± 781.2	0.00024	0.0133	2503.09 ± 1246.68	1358.40 ± 703.10	4.88726e-05	0.00510717
CEACAM7	1.643.0 ± 833.9	890.5 ± 584.0	0.00024	0.0133	1643.00 ± 833.94	950.34 ± 601.25	3.20803e-05	0.00435709
CEBPG	303.1 ± 35.8	377.9 ± 77.7	0.00122	0.0267	303.10 ± 35.85	365.73 ± 75.03	0.00418779	0.0466305
CENPF	27.1 ± 6.8	18.7 ± 2.6	0.00073	0.0204	27.06 ± 6.81	20.44 ± 4.78	0.000554223	0.0154844
CENPK	30.3 ± 8.6	21.7 ± 5.2	0.00024	0.0133	30.25 ± 8.60	23.50 ± 8.53	0.00145399	0.0261182
CENPN	135.8 ± 22.4	107.9 ± 18.3	0.00244	0.0405	135.79 ± 22.43	114.26 ± 22.78	0.000347079	0.0123122
CENPO	64.3 ± 7.5	53.9 ± 10.4	0.00073	0.0204	64.35 ± 7.50	52.88 ± 9.37	0.000471246	0.0144008
CEP192	127.8 ± 12.5	111.6 ± 12.7	0.00122	0.0267	127.84 ± 12.47	112.65 ± 8.77	0.00429124	0.0472636
CEP55	36.5 ± 11.3	24.6 ± 5.0	0.00024	0.0133	36.45 ± 11.27	26.62 ± 6.62	0.000971847	0.0207603
CFB	3.212.5 ± 1.679.4	2.642.4 ± 1.692.3	0.00049	0.0169	3212.48 ± 1679.39	2678.71 ± 1661.90	0.00269902	0.0363197
CFH	183.2 ± 83.8	116.9 ± 37.7	0.00049	0.0169	183.15 ± 83.78	143.61 ± 94.11	0.00199041	0.0310596
CFI	396.5 ± 151.0	294.3 ± 134.0	0.00024	0.0133	396.50 ± 150.98	320.36 ± 128.46	0.00373506	0.0437607
CFL1	2.415.4 ± 263.4	2.218.4 ± 243.6	0.00122	0.0267	2415.38 ± 263.43	2166.20 ± 259.24	0.000234245	0.0101058
CFTR	1.690.9 ± 654.9	1.104.0 ± 648.8	0.00024	0.0133	1690.94 ± 654.90	1197.00 ± 670.50	0.000476853	0.0144917
CGNL1	103.3 ± 38.9	85.6 ± 41.1	0.00073	0.0204	103.35 ± 38.93	88.32 ± 36.15	0.000511406	0.014896
CHAF1B	123.7 ± 34.5	104.7 ± 26.6	0.00073	0.0204	123.67 ± 34.49	104.42 ± 25.70	9.64897e-05	0.00660957
CHCHD2	1.072.0 ± 142.5	1.259.8 ± 224.3	0.00122	0.0267	1072.03 ± 142.54	1322.61 ± 141.64	1.88126e-05	0.0034034
CHEK1	73.8 ± 20.0	52.0 ± 16.7	0.00024	0.0133	73.82 ± 20.00	57.39 ± 17.63	0.00131503	0.0246456
CHGA	1.623.6 ± 643.7	2.240.8 ± 712.4	0.00024	0.0133	1623.59 ± 643.73	2133.40 ± 722.83	0.000138165	0.00784295
CHGB	4.516.7 ± 1.443.4	5.245.9 ± 1.858.1	0.00342	0.0489	4516.73 ± 1443.41	5358.40 ± 1698.17	0.000968168	0.0207421
CHP	2.001.4 ± 180.6	1.862.6 ± 167.3	0.00171	0.0326	2001.38 ± 180.56	1858.90 ± 189.52	0.00391568	0.0448489
CHPF	251.7 ± 51.0	319.9 ± 87.6	0.00024	0.0133	251.75 ± 51.00	317.34 ± 89.31	0.000268122	0.0108047
CHST4	123.2 ± 54.1	67.4 ± 27.9	0.00024	0.0133	123.23 ± 54.06	82.07 ± 43.55	0.000261797	0.0106639
CITED2	493.0 ± 101.3	856.2 ± 441.8	0.00024	0.0133	493.00 ± 101.30	842.27 ± 337.12	5.13024e-05	0.00512299
CKAP2	149.5 ± 25.5	109.7 ± 20.7	0.00024	0.0133	149.54 ± 25.50	119.64 ± 19.67	0.00137059	0.025299
CLIC1	1.100.2 ± 210.1	1.297.2 ± 170.5	0.00024	0.0133	1100.25 ± 210.07	1262.15 ± 191.93	0.00261923	0.0357948
CLIC5	34.8 ± 10.1	24.6 ± 4.3	0.00073	0.0204	34.81 ± 10.10	25.09 ± 4.33	0.000764398	0.0184137
CLMN	304.8 ± 101.3	243.9 ± 91.5	0.00024	0.0133	304.80 ± 101.34	250.28 ± 103.90	0.0011994	0.0235105
CLRN3	53.6 ± 32.7	24.8 ± 8.7	0.00024	0.0133	53.56 ± 32.69	24.28 ± 7.90	2.50176e-05	0.00398876
CMTM7	325.0 ± 87.6	274.2 ± 73.0	0.00024	0.0133	324.96 ± 87.57	278.63 ± 81.44	9.64791e-05	0.00660957
CNGA3	114.5 ± 44.8	190.1 ± 79.9	0.00024	0.0133	114.54 ± 44.79	206.06 ± 100.73	5.80155e-06	0.00227944
CNN3	654.0 ± 200.0	553.9 ± 173.5	0.00024	0.0133	653.97 ± 200.00	562.26 ± 170.77	0.000133535	0.00773484
CNNM3	220.0 ± 23.2	196.9 ± 28.0	0.00342	0.0489	219.95 ± 23.21	193.07 ± 20.96	0.000103927	0.00695033
COG1	241.7 ± 26.9	261.6 ± 33.0	0.00171	0.0326	241.67 ± 26.91	271.67 ± 36.42	0.00289433	0.0377938
COL15A1	302.3 ± 109.1	249.3 ± 87.1	0.00342	0.0489	302.29 ± 109.08	252.75 ± 120.20	0.00273061	0.0365673
COL1A1	1.836.7 ± 872.9	1.261.3 ± 528.2	0.00073	0.0204	1836.70 ± 872.86	1275.09 ± 690.45	1.42835e-06	0.00162038
COL1A2	1.979.9 ± 904.2	1.546.9 ± 718.7	0.00171	0.0326	1979.95 ± 904.15	1565.57 ± 841.60	0.00021808	0.0098066
COL4A1	467.7 ± 171.7	366.4 ± 106.8	0.00244	0.0405	467.73 ± 171.66	361.12 ± 128.90	4.12081e-05	0.00480719
COL5A2	191.8 ± 82.7	147.9 ± 58.9	0.00024	0.0133	191.81 ± 82.74	149.23 ± 69.71	2.85681e-05	0.00416271
COL6A3	886.6 ± 435.3	600.5 ± 263.6	0.00122	0.0267	886.55 ± 435.26	620.85 ± 341.04	1.63849e-05	0.00324414
COPE	438.9 ± 34.3	538.4 ± 35.0	0.00024	0.0133	438.86 ± 34.31	538.21 ± 70.85	0.000895826	0.0199903
COPG	699.6 ± 104.0	781.6 ± 110.1	0.00244	0.0405	699.60 ± 103.99	828.06 ± 132.65	0.000224844	0.00998917
COPG2	105.9 ± 7.8	98.3 ± 10.9	0.00024	0.0133	105.91 ± 7.75	96.04 ± 8.59	0.000135406	0.00777876
COPZ2	108.9 ± 18.6	124.2 ± 16.0	0.00122	0.0267	108.87 ± 18.56	130.60 ± 18.88	0.00072066	0.0177961
COX17	968.3 ± 156.5	1.091.0 ± 201.7	0.00073	0.0204	968.32 ± 156.50	1100.60 ± 202.93	0.000934324	0.0204756
COX7A1	169.8 ± 29.4	187.6 ± 31.6	0.00122	0.0267	169.77 ± 29.45	193.80 ± 35.23	0.000393593	0.0129297
CPM	339.4 ± 136.3	265.4 ± 121.1	0.00024	0.0133	339.44 ± 136.27	290.09 ± 134.07	0.00112847	0.0227165
CPS1	50.2 ± 12.4	41.6 ± 7.9	0.00049	0.0169	50.24 ± 12.37	42.22 ± 10.55	0.000296162	0.0113723
CREB3	271.2 ± 27.6	315.1 ± 40.8	0.00244	0.0405	271.23 ± 27.58	331.79 ± 48.34	0.000212899	0.00975896
CRIM1	552.1 ± 129.2	498.8 ± 124.7	0.00073	0.0204	552.09 ± 129.25	483.51 ± 107.29	0.000576427	0.0158464
CRISP3	331.9 ± 292.8	118.6 ± 90.9	0.00049	0.0169	331.92 ± 292.79	141.49 ± 125.82	1.86864e-05	0.0034034
CRISPLD2	104.5 ± 65.0	74.6 ± 41.3	0.00122	0.0267	104.47 ± 64.99	89.91 ± 76.39	0.00283467	0.0373696
CSK	134.3 ± 16.6	125.2 ± 13.3	0.00171	0.0326	134.29 ± 16.65	123.15 ± 17.16	0.0022667	0.0329848
CSRNP1	132.9 ± 18.2	171.3 ± 27.1	0.00024	0.0133	132.94 ± 18.15	175.87 ± 18.45	1.74728e-06	0.00162038
CTCF	589.5 ± 56.5	525.1 ± 42.6	0.00122	0.0267	589.46 ± 56.52	514.70 ± 46.43	0.00156037	0.0272044
CTDSP2	620.1 ± 128.0	557.7 ± 119.4	0.00024	0.0133	620.12 ± 128.00	546.34 ± 116.14	0.000830917	0.0192648
CTNNB1	2.781.3 ± 298.1	2.495.5 ± 286.9	0.00024	0.0133	2781.31 ± 298.08	2509.32 ± 322.19	0.00102086	0.0214122
CTNND1	1.277.0 ± 173.6	1.125.8 ± 173.2	0.00024	0.0133	1277.01 ± 173.58	1132.65 ± 190.12	0.000320558	0.0118901
CTPS	198.3 ± 42.3	169.5 ± 32.1	0.00073	0.0204	198.29 ± 42.33	178.27 ± 41.85	0.00314999	0.0398091
CTSA	1.797.6 ± 272.0	1.528.1 ± 289.7	0.00024	0.0133	1797.61 ± 271.99	1458.21 ± 260.89	3.86978e-06	0.0020767
CTSC	312.2 ± 81.0	225.5 ± 52.2	0.00073	0.0204	312.22 ± 80.98	237.81 ± 92.35	0.000373078	0.0127662
CTSD	2.536.9 ± 457.3	2.206.8 ± 458.6	0.00049	0.0169	2536.88 ± 457.29	2048.81 ± 418.87	1.7636e-06	0.00162038
CTSE	390.8 ± 166.1	263.1 ± 127.0	0.00024	0.0133	390.80 ± 166.11	286.71 ± 151.16	0.00462009	0.0493943
CTSH	622.1 ± 225.4	434.5 ± 212.4	0.00024	0.0133	622.05 ± 225.44	458.30 ± 216.17	1.0742e-05	0.00265563
CTSO	238.1 ± 35.1	191.7 ± 35.5	0.00024	0.0133	238.06 ± 35.13	192.72 ± 35.55	0.000570013	0.0157362
CTSS	467.6 ± 147.1	324.5 ± 97.1	0.00049	0.0169	467.59 ± 147.14	330.59 ± 108.72	5.02768e-05	0.00511454
CTTNBP2NL	279.0 ± 51.2	236.3 ± 42.0	0.00024	0.0133	279.04 ± 51.17	241.84 ± 48.15	0.000343698	0.0123114
CUL7	152.7 ± 25.6	165.9 ± 28.1	0.00342	0.0489	152.69 ± 25.55	168.95 ± 27.61	0.000850432	0.0195198
CUTA	790.8 ± 147.4	941.8 ± 208.7	0.00024	0.0133	790.85 ± 147.43	901.63 ± 187.06	0.00282663	0.0373307
CXCL6	488.9 ± 258.6	350.8 ± 193.7	0.00024	0.0133	488.87 ± 258.59	348.58 ± 178.17	0.00425069	0.0470667
CXorf57	358.3 ± 157.7	467.0 ± 214.0	0.00024	0.0133	358.26 ± 157.73	428.91 ± 176.56	0.00226658	0.0329848
CXXC5	739.8 ± 60.3	645.7 ± 82.9	0.00049	0.0169	739.80 ± 60.31	634.37 ± 87.20	0.000126741	0.00764362
CYB5A	1.677.2 ± 325.3	1.390.6 ± 315.6	0.00073	0.0204	1677.16 ± 325.27	1427.40 ± 324.86	0.00272281	0.0364852
CYBB	155.4 ± 95.5	80.2 ± 49.5	0.00024	0.0133	155.40 ± 95.46	88.00 ± 68.56	0.000119865	0.00745011
CYFIP1	478.1 ± 60.7	436.7 ± 59.2	0.00049	0.0169	478.07 ± 60.73	435.39 ± 70.47	0.00247455	0.0346792
CYP1A1	289.3 ± 239.7	110.2 ± 93.1	0.00024	0.0133	289.28 ± 239.70	117.67 ± 99.63	5.4111e-05	0.00519903
CYP1B1	508.5 ± 279.7	370.6 ± 203.3	0.00049	0.0169	508.46 ± 279.72	364.72 ± 200.74	0.000186306	0.00916241
CYP4F2	35.4 ± 13.6	24.9 ± 5.5	0.00122	0.0267	35.40 ± 13.64	24.38 ± 5.17	0.000789611	0.018714
CYP4F3	168.8 ± 67.8	96.6 ± 18.9	0.00024	0.0133	168.80 ± 67.78	103.13 ± 29.97	0.000379841	0.0128758
CYP4V2	299.2 ± 73.8	246.6 ± 60.5	0.00049	0.0169	299.20 ± 73.79	237.79 ± 48.94	0.000208429	0.00961418
DCBLD2	554.9 ± 156.9	428.9 ± 107.9	0.00049	0.0169	554.95 ± 156.88	457.48 ± 124.18	6.23067e-05	0.00549033
DCN	320.8 ± 163.3	224.3 ± 125.0	0.00244	0.0405	320.85 ± 163.27	269.09 ± 208.35	0.00329494	0.0409819
DDAH1	710.1 ± 122.2	586.1 ± 79.9	0.00024	0.0133	710.08 ± 122.20	593.89 ± 93.19	9.67291e-05	0.00660957
DDIT3	256.3 ± 63.9	505.5 ± 190.8	0.00024	0.0133	256.32 ± 63.94	521.80 ± 210.42	0.000307402	0.011542
DDIT4	542.8 ± 269.9	766.8 ± 417.2	0.00073	0.0204	542.85 ± 269.90	742.39 ± 354.29	0.000951801	0.0206122
DDOST	1.157.8 ± 50.2	1.275.4 ± 54.1	0.00049	0.0169	1157.79 ± 50.24	1287.12 ± 100.92	0.00278461	0.0370201
DDR1	827.6 ± 134.7	938.4 ± 211.1	0.00024	0.0133	827.57 ± 134.66	947.17 ± 208.60	0.000620208	0.0163819
DERL2	710.0 ± 37.4	811.9 ± 86.1	0.00073	0.0204	709.99 ± 37.40	860.70 ± 84.97	3.42989e-05	0.0046016
DHCR24	873.0 ± 253.9	704.9 ± 220.4	0.00073	0.0204	872.95 ± 253.87	697.23 ± 259.44	0.000216147	0.00980106
DHDDS	501.6 ± 79.6	562.9 ± 86.5	0.00049	0.0169	501.56 ± 79.58	596.97 ± 114.62	0.000302612	0.0114599
DHFR	187.2 ± 32.2	150.1 ± 40.3	0.00171	0.0326	187.23 ± 32.16	157.65 ± 35.42	0.00191121	0.0302964
DHRS3	530.8 ± 242.2	425.3 ± 223.3	0.00024	0.0133	530.78 ± 242.23	388.13 ± 200.42	5.45069e-05	0.00521429
DHRS7	735.4 ± 108.0	792.5 ± 99.4	0.00342	0.0489	735.39 ± 108.04	785.84 ± 112.80	0.000326083	0.0119577
DIRC2	426.1 ± 76.2	363.3 ± 63.0	0.00024	0.0133	426.06 ± 76.24	379.62 ± 74.66	0.00164888	0.02808
DKFZP564O0823	1.027.6 ± 372.2	1.269.7 ± 485.0	0.00171	0.0326	1027.60 ± 372.17	1289.83 ± 486.02	6.04309e-05	0.00545468
DMBT1	137.1 ± 114.7	83.2 ± 60.6	0.00049	0.0169	137.06 ± 114.66	106.24 ± 99.58	0.000238323	0.0102333
DNAJA4	318.3 ± 94.8	417.0 ± 127.4	0.00049	0.0169	318.34 ± 94.77	424.86 ± 133.11	0.0020814	0.0316271
DNAJB9	384.4 ± 111.0	542.7 ± 99.5	0.00024	0.0133	384.39 ± 111.04	585.67 ± 124.33	3.68689e-05	0.00480719
DNAJC12	1.499.1 ± 417.5	1.985.5 ± 576.4	0.00024	0.0133	1499.07 ± 417.51	2181.98 ± 644.05	1.26175e-06	0.00162038
DNMT1	182.4 ± 17.9	154.6 ± 22.8	0.00049	0.0169	182.42 ± 17.92	163.01 ± 18.27	0.000717445	0.0177566
DOCK1	282.2 ± 26.5	251.9 ± 27.4	0.00073	0.0204	282.23 ± 26.53	248.48 ± 33.43	0.00134222	0.0250061
DOCK5	84.1 ± 29.5	72.8 ± 26.9	0.00342	0.0489	84.08 ± 29.46	72.29 ± 24.09	0.00249442	0.0348246
DPYD	187.0 ± 46.5	154.9 ± 38.3	0.00073	0.0204	186.97 ± 46.45	161.82 ± 46.82	0.00139402	0.0254938
DSC2	512.6 ± 140.3	462.1 ± 134.9	0.00171	0.0326	512.59 ± 140.32	469.89 ± 137.97	0.000198446	0.00934967
DSE	237.1 ± 66.9	194.5 ± 49.5	0.00049	0.0169	237.06 ± 66.87	203.55 ± 65.27	0.00187287	0.029985
DSEL	84.2 ± 25.9	61.5 ± 18.3	0.00024	0.0133	84.21 ± 25.93	66.12 ± 17.17	8.68026e-05	0.00630322
DTX4	116.6 ± 20.6	101.0 ± 19.4	0.00171	0.0326	116.56 ± 20.59	95.10 ± 14.62	0.000148504	0.00814238
DUOX2	997.3 ± 525.0	735.2 ± 481.7	0.00122	0.0267	997.30 ± 525.01	739.24 ± 469.77	0.000129912	0.00770457
DUSP5	357.0 ± 61.4	471.4 ± 66.0	0.00049	0.0169	357.01 ± 61.36	433.26 ± 75.29	0.00460993	0.0493576
EDEM2	218.4 ± 22.7	256.2 ± 27.2	0.00049	0.0169	218.35 ± 22.68	268.42 ± 31.88	0.000217869	0.0098066
EDN3	243.4 ± 107.8	374.4 ± 188.2	0.00024	0.0133	243.44 ± 107.81	340.09 ± 182.19	0.000132881	0.00773484
EDNRA	237.8 ± 141.1	158.6 ± 86.7	0.00244	0.0405	237.81 ± 141.13	176.48 ± 134.18	0.00120942	0.0235489
EEF1A2	369.0 ± 110.3	415.0 ± 125.7	0.00122	0.0267	368.97 ± 110.35	441.87 ± 142.15	3.14073e-06	0.0019744
EFNB2	115.5 ± 33.6	87.7 ± 29.6	0.00049	0.0169	115.55 ± 33.63	94.43 ± 27.15	0.000277036	0.0109784
EIF1	5.987.6 ± 380.7	6.587.7 ± 559.7	0.00171	0.0326	5987.57 ± 380.72	6513.80 ± 564.27	0.00045908	0.0141644
EIF2S2	155.1 ± 27.1	181.3 ± 30.8	0.00244	0.0405	155.13 ± 27.11	184.65 ± 35.79	0.00206549	0.0315377
EIF4EBP2	1.216.0 ± 230.8	1.065.0 ± 264.6	0.00049	0.0169	1215.98 ± 230.83	1076.44 ± 227.26	3.10549e-05	0.00429739
ELF3	335.0 ± 116.1	291.0 ± 117.1	0.00049	0.0169	334.95 ± 116.15	278.52 ± 90.44	7.3653e-05	0.00581282
ELL2	1.430.1 ± 198.1	1.815.1 ± 360.0	0.00024	0.0133	1159.81 ± 219.21	1625.93 ± 281.14	4.82831e-07	0.0015183
EMD	224.3 ± 17.8	279.2 ± 15.1	0.00024	0.0133	224.29 ± 17.84	266.82 ± 26.75	7.67658e-05	0.00591333
ENAH	345.3 ± 75.1	278.0 ± 58.4	0.00024	0.0133	345.26 ± 75.14	288.31 ± 75.11	0.00115739	0.0229598
ENC1	242.6 ± 72.7	179.0 ± 64.0	0.00024	0.0133	242.55 ± 72.65	184.24 ± 70.76	0.0001926	0.00924701
ENDOD1	383.0 ± 77.7	451.0 ± 114.0	0.00244	0.0405	383.01 ± 77.75	432.06 ± 91.30	0.00353715	0.0422968
ENG	268.5 ± 66.3	211.6 ± 47.4	0.00122	0.0267	268.46 ± 66.31	205.17 ± 62.22	4.33567e-05	0.0048763
EPB41L4A	120.2 ± 25.7	95.5 ± 26.5	0.00049	0.0169	120.20 ± 25.72	98.52 ± 26.35	0.00197358	0.0309338
EPHX1	669.4 ± 161.9	498.4 ± 141.7	0.00024	0.0133	669.36 ± 161.88	527.37 ± 139.97	8.89331e-05	0.00639461
EPS8	576.9 ± 161.3	435.9 ± 141.1	0.00024	0.0133	576.88 ± 161.28	452.88 ± 163.19	0.000479329	0.0145468
ERBB2	201.7 ± 51.5	177.1 ± 52.1	0.00244	0.0405	201.72 ± 51.51	176.46 ± 42.85	0.00076044	0.0183864
ERBB2IP	459.6 ± 60.4	385.9 ± 72.0	0.00024	0.0133	459.55 ± 60.43	408.48 ± 75.39	0.00284889	0.0374225
ERBB3	208.3 ± 74.3	160.8 ± 64.8	0.00024	0.0133	208.32 ± 74.30	158.24 ± 56.12	9.51338e-05	0.00658233
ERCC6	191.3 ± 23.6	174.4 ± 31.8	0.00073	0.0204	191.31 ± 23.63	170.99 ± 20.15	0.00187521	0.029985
ERGIC1	621.8 ± 114.9	547.7 ± 108.4	0.00049	0.0169	621.75 ± 114.91	544.94 ± 125.69	0.00169197	0.0285927
ERMN	28.5 ± 30.0	35.3 ± 34.4	0.00244	0.0405	28.55 ± 29.98	34.46 ± 25.37	0.000116502	0.00739407
ERMP1	510.8 ± 89.1	439.9 ± 84.6	0.00024	0.0133	510.85 ± 89.07	436.72 ± 62.06	0.00097591	0.0208066
ERN1	171.8 ± 23.0	204.0 ± 49.4	0.00122	0.0267	171.76 ± 23.05	200.34 ± 41.10	0.000845222	0.0194667
ERP27	298.8 ± 167.2	201.1 ± 165.5	0.00049	0.0169	298.77 ± 167.23	212.46 ± 157.67	0.0022612	0.0329701
ERP44	1.377.4 ± 98.2	1.542.8 ± 159.4	0.00024	0.0133	1377.38 ± 98.16	1627.11 ± 170.92	2.08618e-05	0.00367815
ESCO2	25.0 ± 8.5	15.0 ± 3.7	0.00073	0.0204	24.98 ± 8.48	17.57 ± 7.56	0.000548089	0.0154251
ESRP1	1.009.5 ± 110.9	1.203.4 ± 106.9	0.00073	0.0204	1009.47 ± 110.92	1255.02 ± 152.25	5.91927e-05	0.00542661
ETV1	448.2 ± 193.6	561.2 ± 280.6	0.00342	0.0489	448.23 ± 193.56	630.47 ± 292.11	2.71746e-05	0.00413837
ETV4	36.2 ± 5.5	43.0 ± 6.6	0.00244	0.0405	36.24 ± 5.50	43.44 ± 9.91	0.00176731	0.0289972
EVI2B	29.4 ± 11.1	21.2 ± 5.9	0.00073	0.0204	29.44 ± 11.06	21.46 ± 7.60	0.00327884	0.0408953
EXO1	38.0 ± 10.7	25.8 ± 5.7	0.00049	0.0169	38.05 ± 10.69	27.67 ± 7.60	0.000325412	0.0119531
F11	165.4 ± 53.0	113.4 ± 49.3	0.00049	0.0169	165.37 ± 53.02	110.33 ± 37.42	0.000681733	0.0172414
F2R	194.1 ± 101.6	138.6 ± 51.2	0.00073	0.0204	194.12 ± 101.56	153.92 ± 86.71	0.000263568	0.0106639
FADS1	396.9 ± 102.4	588.2 ± 187.9	0.00024	0.0133	396.86 ± 102.40	578.72 ± 160.08	2.14112e-05	0.00367996
FADS2	578.5 ± 194.6	762.0 ± 260.8	0.00024	0.0133	578.53 ± 194.63	771.37 ± 253.80	2.42508e-05	0.00392336
FAM148B	178.6 ± 35.7	231.9 ± 54.9	0.00073	0.0204	178.64 ± 35.73	255.39 ± 63.64	0.000648269	0.0167748
FAM159B	258.9 ± 162.8	182.5 ± 120.4	0.00024	0.0133	258.94 ± 162.81	186.49 ± 106.97	0.00346913	0.0419184
FAM23A	266.1 ± 103.1	375.6 ± 175.8	0.00342	0.0489	266.06 ± 103.08	382.80 ± 172.99	0.000726657	0.017904
FAM96B	801.5 ± 77.0	957.6 ± 84.3	0.00024	0.0133	801.54 ± 77.05	922.50 ± 64.58	0.0023764	0.0338865
FANCI	98.3 ± 16.2	76.7 ± 15.8	0.00049	0.0169	98.29 ± 16.25	81.10 ± 17.63	0.000449598	0.0139721
FARP1	263.1 ± 50.1	232.7 ± 40.9	0.00049	0.0169	263.06 ± 50.13	232.54 ± 47.13	0.00114243	0.022872
FARP2	196.7 ± 21.6	169.0 ± 23.7	0.00024	0.0133	196.70 ± 21.58	169.78 ± 19.48	9.23949e-05	0.00645371
FBP1	315.6 ± 111.9	247.2 ± 101.4	0.00073	0.0204	315.59 ± 111.89	245.24 ± 91.02	0.00456395	0.0490667
FGL2	108.9 ± 50.9	74.3 ± 46.9	0.00342	0.0489	108.90 ± 50.92	66.56 ± 27.77	0.00018351	0.00905307
FHL2	152.2 ± 36.7	129.6 ± 27.1	0.00073	0.0204	152.15 ± 36.72	128.92 ± 34.14	0.00151494	0.026668
FICD	230.5 ± 63.3	312.3 ± 61.7	0.00024	0.0133	230.47 ± 63.33	344.06 ± 91.03	5.79894e-05	0.00538884
FKBP11	149.1 ± 15.3	177.0 ± 21.0	0.00024	0.0133	149.09 ± 15.30	190.81 ± 27.01	2.90642e-05	0.00419868
FLII	401.3 ± 57.3	468.8 ± 76.2	0.00049	0.0169	401.32 ± 57.27	466.67 ± 75.88	0.000172804	0.00866668
FLJ14213	73.1 ± 16.6	61.2 ± 9.1	0.00171	0.0326	73.10 ± 16.60	62.51 ± 10.36	0.000275931	0.0109775
FLJ35776	80.0 ± 23.9	113.3 ± 41.1	0.00024	0.0133	80.01 ± 23.92	103.41 ± 32.52	0.00348508	0.041926
FLRT2	435.9 ± 193.1	311.5 ± 162.9	0.00024	0.0133	435.87 ± 193.13	336.29 ± 157.88	0.00169491	0.0286074
FMO4	61.1 ± 12.1	52.1 ± 11.1	0.00244	0.0405	61.12 ± 12.09	49.02 ± 12.71	0.000500529	0.0147523
FN1	1.679.4 ± 750.8	1.213.2 ± 636.7	0.00122	0.0267	1679.41 ± 750.78	1212.39 ± 616.78	1.35821e-05	0.00301858
FOLR1	88.0 ± 20.5	60.9 ± 13.3	0.00024	0.0133	87.98 ± 20.46	63.12 ± 13.60	2.11033e-05	0.00367815
FOS	453.4 ± 363.6	631.0 ± 316.0	0.00073	0.0204	453.37 ± 363.59	621.98 ± 322.91	0.000167073	0.00854547
FPR3	69.7 ± 28.2	46.5 ± 26.3	0.00342	0.0489	69.67 ± 28.21	51.05 ± 18.59	0.00115831	0.0229598
FRAS1	58.9 ± 13.8	48.0 ± 12.8	0.00024	0.0133	58.93 ± 13.77	48.54 ± 12.58	0.000539521	0.0154051
FREM2	56.8 ± 18.2	40.2 ± 13.4	0.00049	0.0169	56.78 ± 18.24	38.89 ± 12.42	6.77854e-05	0.00560879
FRMD6	163.5 ± 64.2	132.3 ± 45.7	0.00024	0.0133	163.49 ± 64.16	130.43 ± 49.78	0.000548684	0.0154251
FRMPD1	48.4 ± 31.0	68.3 ± 48.8	0.00342	0.0489	48.39 ± 30.99	86.23 ± 86.54	0.0027056	0.036321
FSTL1	1.010.2 ± 276.1	823.9 ± 209.3	0.00073	0.0204	1010.25 ± 276.09	819.57 ± 266.29	0.000239614	0.0102417
FTSJ1	170.9 ± 15.0	197.9 ± 18.6	0.00024	0.0133	170.89 ± 15.04	206.73 ± 31.85	0.000874792	0.0198627
FUCA2	820.8 ± 120.8	901.9 ± 164.6	0.00171	0.0326	820.77 ± 120.78	936.40 ± 162.51	0.000166568	0.00854547
FXYD3	426.5 ± 97.5	338.7 ± 97.4	0.00024	0.0133	426.46 ± 97.49	333.45 ± 82.86	0.00241351	0.034194
G3BP1	1.968.9 ± 220.4	1.772.3 ± 152.5	0.00049	0.0169	1968.86 ± 220.38	1718.97 ± 177.39	0.00337373	0.0414001
GALM	145.9 ± 37.1	101.3 ± 27.2	0.00024	0.0133	145.88 ± 37.10	115.31 ± 31.21	0.000840311	0.0193805
GALNT1	541.5 ± 102.4	467.5 ± 95.8	0.00342	0.0489	541.47 ± 102.35	471.39 ± 85.34	0.00181869	0.0294977
GALNT4	327.2 ± 105.5	234.0 ± 61.5	0.00024	0.0133	327.23 ± 105.50	234.92 ± 63.65	0.000156447	0.00832177
GALNT7	515.9 ± 116.4	410.2 ± 95.9	0.00024	0.0133	515.91 ± 116.39	434.88 ± 112.72	0.00390476	0.0448185
GAP43	190.4 ± 83.6	325.9 ± 139.4	0.00024	0.0133	190.43 ± 83.61	348.20 ± 144.66	9.75322e-07	0.00162038
GARS	1.335.4 ± 81.4	1.564.3 ± 190.6	0.00171	0.0326	1335.39 ± 81.40	1640.87 ± 164.72	8.80739e-05	0.00637449
GATAD2B	242.0 ± 17.2	216.9 ± 18.6	0.00171	0.0326	242.02 ± 17.18	219.94 ± 24.93	0.00411115	0.0461743
GATM	1.605.1 ± 647.1	1.177.8 ± 529.9	0.00171	0.0326	1605.05 ± 647.14	1234.70 ± 570.58	0.0040788	0.046046
GBP1	363.7 ± 127.5	282.1 ± 104.4	0.00171	0.0326	363.74 ± 127.55	290.14 ± 116.70	0.0024102	0.0341912
GBP3	322.1 ± 147.9	226.0 ± 109.5	0.00024	0.0133	322.12 ± 147.90	246.65 ± 117.64	0.00109486	0.0222434
GCH1	722.3 ± 248.2	1.050.1 ± 404.9	0.00049	0.0169	722.34 ± 248.23	1037.59 ± 331.19	1.30435e-05	0.00295866
GCKR	80.8 ± 32.2	104.2 ± 65.0	0.00122	0.0267	80.79 ± 32.24	101.38 ± 51.28	0.000695654	0.017514
GCNT3	887.8 ± 384.7	600.7 ± 223.8	0.00024	0.0133	887.83 ± 384.74	602.92 ± 228.47	0.00034524	0.0123114
GCOM1	186.5 ± 78.0	137.8 ± 62.2	0.00073	0.0204	186.54 ± 78.02	144.33 ± 62.38	0.000804574	0.0188728
GGA2	385.2 ± 69.2	436.5 ± 79.2	0.00049	0.0169	385.17 ± 69.19	445.06 ± 91.04	0.00361271	0.042846
GGH	157.8 ± 30.8	114.7 ± 24.9	0.00024	0.0133	157.82 ± 30.83	117.97 ± 31.19	2.78449e-05	0.00413837
GGT1	248.5 ± 90.0	195.4 ± 62.3	0.00049	0.0169	248.46 ± 89.96	197.07 ± 61.29	0.000114898	0.00736108
GGT3P	188.5 ± 67.6	149.3 ± 39.5	0.00122	0.0267	188.48 ± 67.60	151.59 ± 43.84	0.000953492	0.0206193
GIPC2	335.0 ± 135.0	261.8 ± 113.6	0.00024	0.0133	335.03 ± 135.01	276.10 ± 117.21	0.0027181	0.0364443
GLIPR1	213.6 ± 104.2	153.3 ± 54.1	0.00122	0.0267	213.60 ± 104.16	166.40 ± 76.65	0.00212896	0.0318656
GLRA1	261.8 ± 192.2	158.4 ± 111.3	0.00024	0.0133	261.77 ± 192.25	129.45 ± 67.43	1.28246e-05	0.00293931
GLRX3	594.5 ± 57.2	671.9 ± 72.3	0.00024	0.0133	594.47 ± 57.19	668.86 ± 77.81	0.000461703	0.0141682
GLUL	1.645.2 ± 258.4	1.484.1 ± 227.0	0.00244	0.0405	455.52 ± 68.93	407.93 ± 59.55	9.95365e-06	0.00258202
GMPPB	168.4 ± 16.5	211.4 ± 30.4	0.00049	0.0169	168.36 ± 16.54	211.20 ± 36.06	0.000383033	0.0128758
GNGT1	4.1 ± 0.4	4.5 ± 0.5	0.00024	0.0133	4.08 ± 0.40	5.02 ± 0.88	0.000215821	0.00980106
GNL3	757.3 ± 102.2	888.3 ± 116.3	0.00122	0.0267	757.27 ± 102.23	1033.79 ± 205.78	1.02162e-05	0.00258202
GNPTG	418.4 ± 66.7	393.1 ± 62.1	0.00342	0.0489	418.40 ± 66.68	363.24 ± 54.21	6.02991e-05	0.00545468
GOLM1	1.482.9 ± 333.2	1.149.3 ± 269.1	0.00024	0.0133	1482.94 ± 333.19	1209.18 ± 262.49	2.92172e-05	0.00419868
GPR110	246.7 ± 123.7	117.4 ± 48.5	0.00024	0.0133	246.66 ± 123.69	127.72 ± 61.86	4.38933e-05	0.00487759
GPRC5B	796.9 ± 322.0	586.9 ± 262.5	0.00024	0.0133	796.94 ± 322.05	570.14 ± 251.08	6.31744e-05	0.00549033
GPX3	1.160.6 ± 474.1	1.324.5 ± 453.8	0.00244	0.0405	1160.63 ± 474.09	1341.43 ± 482.77	0.000571605	0.0157603
GPX8	247.5 ± 86.3	193.4 ± 74.6	0.00171	0.0326	247.51 ± 86.32	204.15 ± 88.56	0.000276402	0.0109775
GRAMD4	211.4 ± 45.4	314.3 ± 181.3	0.00244	0.0405	211.45 ± 45.37	316.01 ± 123.31	0.00163433	0.0278971
GRHL2	129.2 ± 42.0	112.9 ± 45.9	0.00342	0.0489	129.21 ± 42.02	111.53 ± 40.35	0.00396824	0.0451826
GRK5	120.4 ± 29.3	94.2 ± 16.7	0.00073	0.0204	120.37 ± 29.33	94.96 ± 20.65	0.00200024	0.0311627
GSDMB	61.8 ± 26.9	44.1 ± 17.9	0.00024	0.0133	61.77 ± 26.88	42.61 ± 14.94	5.95402e-05	0.00543583
GSTA1	1.100.4 ± 585.7	836.4 ± 491.3	0.00122	0.0267	1100.41 ± 585.70	864.38 ± 457.31	0.00132279	0.0247489
GSTK1	362.4 ± 54.4	318.4 ± 52.8	0.00073	0.0204	362.44 ± 54.44	308.47 ± 64.98	0.00117271	0.0232037
GSTM2	108.4 ± 16.7	96.0 ± 14.8	0.00342	0.0489	108.38 ± 16.68	94.59 ± 18.99	0.00127493	0.0242032
GTPBP2	208.3 ± 32.2	268.4 ± 48.1	0.00024	0.0133	208.28 ± 32.17	266.75 ± 50.61	0.0012375	0.0237385
GUK1	587.1 ± 53.3	658.1 ± 79.8	0.00024	0.0133	587.10 ± 53.31	646.87 ± 50.96	0.00122623	0.0235907
H2AFV	662.8 ± 57.9	612.5 ± 65.0	0.00171	0.0326	662.83 ± 57.94	615.55 ± 59.04	0.00132967	0.0248353
H3F3A	3.364.2 ± 306.7	2.871.3 ± 231.4	0.00024	0.0133	3364.18 ± 306.67	2907.60 ± 263.50	0.000175692	0.0087856
HABP2	363.8 ± 147.3	252.2 ± 189.4	0.00244	0.0405	363.76 ± 147.30	264.83 ± 175.07	0.00131292	0.0246401
HAS2	239.7 ± 183.9	127.1 ± 76.7	0.00049	0.0169	239.68 ± 183.88	133.75 ± 112.41	3.62867e-06	0.001996
HDAC1	1.673.8 ± 114.4	1.560.7 ± 131.4	0.00244	0.0405	1673.76 ± 114.36	1502.24 ± 163.83	0.00137048	0.025299
HDAC2	816.9 ± 52.0	735.5 ± 86.7	0.00342	0.0489	816.91 ± 52.01	736.60 ± 85.40	0.00347308	0.0419184
HDHD1A	179.3 ± 32.6	155.2 ± 35.3	0.00049	0.0169	179.33 ± 32.59	161.77 ± 37.38	0.00193177	0.0305342
HEG1	178.6 ± 39.4	123.5 ± 28.0	0.00024	0.0133	178.55 ± 39.41	123.25 ± 31.13	4.0407e-05	0.00480719
HEPH	55.3 ± 29.5	38.4 ± 15.5	0.00024	0.0133	55.25 ± 29.46	41.75 ± 28.00	0.00428874	0.0472636
HERPUD1	1.761.3 ± 293.7	2.315.8 ± 418.8	0.00024	0.0133	1761.33 ± 293.73	2576.63 ± 705.84	0.000131233	0.00773484
HEXIM1	588.2 ± 75.2	473.5 ± 67.3	0.00024	0.0133	588.23 ± 75.20	490.64 ± 60.57	0.000160143	0.00844395
HEY1	96.2 ± 23.1	81.0 ± 14.5	0.00342	0.0489	96.24 ± 23.05	80.31 ± 11.75	0.00159118	0.0274803
HEYL	142.8 ± 28.2	119.0 ± 16.0	0.00073	0.0204	142.83 ± 28.18	115.73 ± 20.61	4.35619e-06	0.00209952
HHEX	427.6 ± 78.2	340.5 ± 77.3	0.00024	0.0133	427.58 ± 78.16	342.30 ± 70.48	0.000594367	0.0161069
HIBADH	578.4 ± 78.2	507.3 ± 88.2	0.00024	0.0133	578.36 ± 78.24	509.10 ± 70.25	0.00468539	0.049778
HIF1A	3.106.2 ± 595.6	2.352.7 ± 471.6	0.00024	0.0133	3106.16 ± 595.61	2612.51 ± 661.98	0.000273364	0.0109198
HINT1	635.4 ± 57.7	683.6 ± 62.1	0.00342	0.0489	635.37 ± 57.69	699.49 ± 47.38	0.000134125	0.00774561
HIP1	62.4 ± 9.5	54.3 ± 8.2	0.00049	0.0169	62.45 ± 9.52	53.81 ± 7.41	0.000118785	0.00742491
HIST1H1A	178.7 ± 90.8	121.4 ± 32.7	0.00122	0.0267	178.72 ± 90.84	142.16 ± 89.08	0.000232109	0.0100654
HIST1H1B	145.6 ± 68.7	83.3 ± 13.8	0.00122	0.0267	145.61 ± 68.68	93.56 ± 43.24	0.000706716	0.0176432
HIST1H2BM	168.1 ± 79.8	97.5 ± 26.4	0.00024	0.0133	168.11 ± 79.83	108.77 ± 59.14	0.000101035	0.0068191
HIST1H3I	361.5 ± 121.2	274.6 ± 78.7	0.00122	0.0267	361.50 ± 121.17	283.38 ± 88.34	0.00227945	0.0330828
HK1	169.7 ± 43.7	150.4 ± 43.5	0.00244	0.0405	169.73 ± 43.68	145.66 ± 43.60	7.67049e-05	0.00591333
HLA-DMA	158.6 ± 42.1	124.7 ± 33.6	0.00024	0.0133	158.62 ± 42.07	121.06 ± 30.86	0.000146599	0.00807377
HLA-DMB	183.6 ± 45.3	134.1 ± 37.9	0.00024	0.0133	183.57 ± 45.34	132.32 ± 26.16	6.33662e-05	0.00549033
HLA-DRA	254.1 ± 82.7	181.4 ± 65.4	0.00024	0.0133	327.54 ± 105.93	232.40 ± 82.22	0.000232393	0.0100654
HLA-DRB3	182.0 ± 52.0	138.3 ± 40.5	0.00024	0.0133	194.07 ± 58.97	149.38 ± 54.06	0.00107513	0.0220257
HLA-DRB5	59.0 ± 48.7	44.3 ± 36.9	0.00024	0.0133	59.04 ± 48.67	40.47 ± 27.92	0.000852563	0.0195198
HMGB1	2.164.6 ± 194.4	1.905.2 ± 166.1	0.00122	0.0267	82.20 ± 7.79	70.30 ± 9.19	0.000985387	0.0209276
HN1	292.4 ± 63.3	255.0 ± 54.8	0.00244	0.0405	292.38 ± 63.28	252.74 ± 58.61	0.00284839	0.0374225
HNF1B	193.1 ± 53.2	154.7 ± 48.4	0.00049	0.0169	193.12 ± 53.22	159.75 ± 50.30	0.000270673	0.0108839
HNF4G	123.1 ± 43.5	99.8 ± 32.8	0.00049	0.0169	123.12 ± 43.53	103.10 ± 34.30	0.00382165	0.0443758
HNMT	89.7 ± 26.8	67.2 ± 19.9	0.00024	0.0133	89.73 ± 26.78	73.24 ± 22.50	0.00187015	0.029985
HNRNPAB	1.790.8 ± 171.1	1.612.1 ± 191.9	0.00024	0.0133	1790.77 ± 171.11	1629.58 ± 230.27	0.00345329	0.0418876
HNRNPK	2.952.4 ± 165.6	2.709.0 ± 151.4	0.00073	0.0204	2952.40 ± 165.59	2712.94 ± 113.41	0.000388951	0.0128758
HSD11B1	187.6 ± 93.8	157.2 ± 91.1	0.00122	0.0267	187.63 ± 93.84	154.56 ± 83.65	0.000770247	0.0184813
HSD17B11	938.3 ± 149.1	756.8 ± 125.3	0.00024	0.0133	938.29 ± 149.09	831.75 ± 135.61	0.00214425	0.0319872
HSD17B2	1.294.9 ± 542.3	746.2 ± 438.0	0.00024	0.0133	1294.89 ± 542.29	793.78 ± 485.17	0.00214658	0.0319872
HSD17B8	164.1 ± 27.9	204.9 ± 50.7	0.00024	0.0133	164.06 ± 27.86	196.18 ± 40.52	0.00175765	0.0289467
HSP90AB2P	109.0 ± 12.6	126.5 ± 14.1	0.00342	0.0489	108.97 ± 12.56	131.12 ± 12.47	0.000324444	0.0119374
HSP90B1	5.084.1 ± 780.6	5.725.6 ± 788.4	0.00049	0.0169	5084.11 ± 780.58	5945.55 ± 943.75	8.59485e-05	0.00626186
HSPA13	1.616.7 ± 409.9	2.015.7 ± 409.9	0.00122	0.0267	1616.71 ± 409.88	2147.11 ± 442.98	3.76544e-05	0.00480719
HSPA5	4.054.0 ± 637.0	5.047.2 ± 800.6	0.00024	0.0133	4054.03 ± 636.97	5488.26 ± 1144.06	7.41632e-06	0.00238556
HTRA1	477.0 ± 81.1	401.5 ± 61.7	0.00024	0.0133	476.97 ± 81.11	392.69 ± 77.00	3.73069e-05	0.00480719
HYOU1	904.7 ± 187.6	1.084.3 ± 162.4	0.00049	0.0169	904.65 ± 187.61	1158.29 ± 267.98	0.00024572	0.0103938
IARS	1.666.5 ± 239.4	1.840.2 ± 249.0	0.00049	0.0169	1666.53 ± 239.38	1940.00 ± 278.26	0.000496947	0.0147092
ICA1	286.8 ± 64.2	340.0 ± 81.6	0.00049	0.0169	286.77 ± 64.19	353.77 ± 79.34	6.34446e-05	0.00549033
ICAM2	86.9 ± 12.3	105.5 ± 20.3	0.00122	0.0267	86.90 ± 12.26	101.23 ± 15.87	0.00316024	0.0398699
ID3	371.2 ± 126.9	278.3 ± 76.3	0.00024	0.0133	371.18 ± 126.93	277.06 ± 116.52	0.000125981	0.00764362
IDH1	1.782.3 ± 233.7	1.555.4 ± 194.5	0.00024	0.0133	1782.34 ± 233.70	1627.77 ± 227.75	0.00244726	0.0344142
IDS	2.191.5 ± 660.0	2.661.6 ± 708.4	0.00024	0.0133	2191.54 ± 659.95	2787.95 ± 800.01	0.000121559	0.00750622
IER3	1.166.2 ± 400.3	1.669.4 ± 454.9	0.00122	0.0267	960.28 ± 311.52	1597.92 ± 362.98	5.33981e-05	0.00517573
IFI27L2	290.9 ± 36.0	316.5 ± 47.5	0.00342	0.0489	290.92 ± 35.97	325.02 ± 52.62	0.0015887	0.0274591
IFI30	914.6 ± 188.6	698.1 ± 153.2	0.00024	0.0133	914.56 ± 188.56	706.05 ± 165.34	6.39823e-05	0.00549033
IFRD1	341.5 ± 97.7	458.2 ± 161.0	0.00073	0.0204	341.46 ± 97.74	473.53 ± 168.17	2.99083e-05	0.00421832
IGF1R	361.2 ± 97.4	307.7 ± 54.7	0.00024	0.0133	361.20 ± 97.38	288.30 ± 28.80	0.00083476	0.0192929
IGSF6	48.4 ± 17.1	38.7 ± 11.7	0.00171	0.0326	48.44 ± 17.08	34.98 ± 10.14	0.00045497	0.0140794
IL1RL2	38.5 ± 5.4	44.9 ± 7.9	0.00342	0.0489	38.51 ± 5.43	45.59 ± 7.32	0.000339202	0.0122149
IL8	801.7 ± 480.6	1.285.2 ± 809.2	0.00171	0.0326	801.67 ± 480.59	1154.01 ± 679.21	0.00142999	0.0258319
INSR	285.3 ± 69.4	240.8 ± 78.3	0.00024	0.0133	285.30 ± 69.42	237.41 ± 57.43	0.000204204	0.00949521
IQCB1	188.9 ± 46.3	218.6 ± 62.4	0.00244	0.0405	188.94 ± 46.27	224.75 ± 66.03	0.000133587	0.00773484
IQGAP2	340.9 ± 124.2	211.5 ± 115.6	0.00024	0.0133	340.92 ± 124.16	233.52 ± 123.48	8.18802e-05	0.0061487
IRS2	169.0 ± 27.3	205.6 ± 33.2	0.00122	0.0267	169.01 ± 27.31	202.48 ± 31.85	0.00135158	0.0251379
ITGA4	65.2 ± 23.3	50.2 ± 16.4	0.00049	0.0169	65.24 ± 23.25	51.36 ± 15.91	0.00171084	0.0286864
ITGA5	361.3 ± 120.8	301.4 ± 118.0	0.00024	0.0133	361.27 ± 120.83	282.98 ± 106.31	1.63935e-06	0.00162038
ITGB3	341.1 ± 161.6	250.9 ± 120.6	0.00049	0.0169	341.11 ± 161.64	243.42 ± 139.56	2.93874e-05	0.00419868
ITPKC	101.1 ± 22.6	119.9 ± 39.8	0.00244	0.0405	101.07 ± 22.64	120.17 ± 28.86	0.0015664	0.0272665
ITSN1	134.9 ± 14.2	121.3 ± 12.8	0.00122	0.0267	134.90 ± 14.24	117.11 ± 9.86	0.00124649	0.0238292
JAG1	290.3 ± 62.1	238.4 ± 59.1	0.00024	0.0133	290.34 ± 62.11	245.88 ± 63.08	0.00115218	0.0229598
JARID2	187.6 ± 36.2	159.9 ± 31.8	0.00024	0.0133	187.62 ± 36.24	155.35 ± 26.10	0.000273462	0.0109198
JMJD6	202.7 ± 18.9	245.5 ± 43.7	0.00122	0.0267	202.66 ± 18.88	255.76 ± 33.00	4.1701e-05	0.00480719
JOSD1	883.1 ± 178.9	994.1 ± 210.8	0.00122	0.0267	883.13 ± 178.87	992.44 ± 227.18	0.00393384	0.0449173
JUND	380.7 ± 55.1	460.6 ± 70.5	0.00049	0.0169	380.71 ± 55.06	432.84 ± 67.34	0.00238065	0.033925
KANK2	115.1 ± 21.3	101.3 ± 11.0	0.00244	0.0405	115.07 ± 21.26	105.53 ± 20.70	0.00136515	0.0252834
KBTBD10	616.8 ± 258.3	904.9 ± 417.8	0.00024	0.0133	616.80 ± 258.29	1093.74 ± 437.40	1.60463e-05	0.00324414
KCNJ15	137.4 ± 64.1	84.5 ± 37.5	0.00024	0.0133	137.45 ± 64.09	99.18 ± 47.46	0.00140038	0.02557
KCNK5	219.1 ± 77.4	138.3 ± 63.9	0.00024	0.0133	219.12 ± 77.39	145.62 ± 62.09	9.3363e-05	0.00650069
KCTD12	331.4 ± 66.0	457.4 ± 111.6	0.00049	0.0169	331.40 ± 65.98	445.44 ± 109.01	0.000181483	0.00898649
KCTD14	173.6 ± 25.0	193.9 ± 24.7	0.00122	0.0267	173.63 ± 25.02	202.45 ± 37.73	0.00137777	0.0253464
KCTD2	219.6 ± 19.7	198.9 ± 16.0	0.00049	0.0169	219.56 ± 19.69	201.90 ± 15.91	9.42207e-05	0.00653972
KDM3B	465.3 ± 34.9	410.7 ± 38.1	0.00024	0.0133	465.32 ± 34.89	420.89 ± 34.15	0.000246116	0.0103938
KDR	194.6 ± 89.5	112.1 ± 41.4	0.00073	0.0204	194.62 ± 89.53	105.98 ± 39.21	0.000258509	0.0105526
KGFLP2	40.9 ± 7.8	46.4 ± 8.2	0.00171	0.0326	40.92 ± 7.77	45.50 ± 9.36	0.000769548	0.0184813
KIAA0101	65.9 ± 20.6	37.6 ± 10.5	0.00024	0.0133	65.95 ± 20.60	43.07 ± 18.65	0.00071435	0.0177464
KIAA0232	229.5 ± 26.1	194.7 ± 32.8	0.00171	0.0326	229.47 ± 26.05	196.72 ± 21.96	0.000298004	0.0113962
KIAA0495	83.4 ± 8.2	72.5 ± 8.8	0.00122	0.0267	83.41 ± 8.24	74.64 ± 8.45	0.000948264	0.0206023
KIAA0513	129.5 ± 19.8	159.4 ± 19.7	0.00049	0.0169	129.53 ± 19.84	174.55 ± 39.85	6.12147e-05	0.00549033
KIAA0746	1.140.9 ± 343.6	973.9 ± 295.4	0.00073	0.0204	1140.87 ± 343.60	1014.06 ± 313.80	0.00446513	0.048441
KIAA1161	121.5 ± 28.7	100.7 ± 27.8	0.00122	0.0267	121.54 ± 28.66	96.90 ± 22.31	0.000288546	0.0112168
KIAA1244	574.1 ± 190.3	735.4 ± 279.5	0.00122	0.0267	574.12 ± 190.28	754.51 ± 302.57	0.00048602	0.0146689
KIF11	27.4 ± 7.0	17.8 ± 4.3	0.00049	0.0169	27.37 ± 6.98	18.59 ± 6.87	8.51207e-05	0.00624289
KIF13B	332.2 ± 39.9	286.6 ± 51.0	0.00073	0.0204	332.24 ± 39.88	285.06 ± 42.65	0.000696418	0.017514
KIF1C	271.9 ± 50.4	242.4 ± 50.5	0.00073	0.0204	271.88 ± 50.44	242.07 ± 63.21	0.00348449	0.041926
KIF20A	26.9 ± 6.8	19.3 ± 4.0	0.00342	0.0489	26.86 ± 6.80	19.89 ± 6.27	0.000365469	0.01266
KIF23	44.3 ± 19.3	27.8 ± 5.3	0.00122	0.0267	44.35 ± 19.34	32.38 ± 18.96	0.00322948	0.040419
KIF5A	81.1 ± 25.0	96.8 ± 28.5	0.00244	0.0405	81.10 ± 25.00	95.95 ± 23.91	0.00114624	0.0228985
KIRREL	129.9 ± 32.1	107.4 ± 25.7	0.00049	0.0169	129.86 ± 32.12	114.14 ± 32.89	0.00101474	0.0213449
KIRREL3	140.7 ± 30.4	168.8 ± 51.4	0.00244	0.0405	140.74 ± 30.40	189.46 ± 59.26	0.000247861	0.0104075
KITLG	168.2 ± 48.0	121.3 ± 36.2	0.00024	0.0133	168.19 ± 48.01	130.97 ± 38.68	0.000231224	0.0100654
KLHL7	220.7 ± 23.5	191.1 ± 18.4	0.00024	0.0133	220.74 ± 23.54	194.46 ± 19.51	0.00307124	0.0391739
KMO	13.4 ± 2.3	25.1 ± 21.1	0.00122	0.0267	13.44 ± 2.28	22.07 ± 9.33	0.00245277	0.0344397
KRT19	1.008.7 ± 454.2	832.9 ± 392.6	0.00073	0.0204	1008.75 ± 454.19	823.37 ± 383.61	0.000653503	0.0168566
KRT8	4.125.0 ± 1.179.5	3.482.0 ± 991.5	0.00049	0.0169	4124.98 ± 1179.49	3493.56 ± 993.51	0.000528093	0.0152617
LAD1	222.2 ± 63.5	188.7 ± 55.1	0.00342	0.0489	222.19 ± 63.49	185.37 ± 55.38	0.000125023	0.00764362
LAMA2	73.7 ± 37.0	57.7 ± 20.2	0.00342	0.0489	73.66 ± 37.00	61.39 ± 34.19	4.34385e-05	0.0048763
LAMA3	95.8 ± 25.6	72.4 ± 23.7	0.00122	0.0267	95.83 ± 25.61	78.04 ± 19.65	0.00335079	0.0412807
LAMA4	244.8 ± 106.0	177.3 ± 68.9	0.00342	0.0489	244.84 ± 105.99	175.50 ± 87.77	1.47946e-05	0.00316036
LAMB1	608.8 ± 129.2	467.5 ± 101.8	0.00049	0.0169	608.80 ± 129.23	475.54 ± 124.04	4.2699e-05	0.00486779
LAMC1	791.0 ± 144.6	662.8 ± 113.6	0.00024	0.0133	791.03 ± 144.64	670.46 ± 114.65	0.00015042	0.00815247
LAMP1	1.062.4 ± 160.5	983.5 ± 169.8	0.00049	0.0169	1062.43 ± 160.47	939.39 ± 141.79	8.58492e-05	0.00626186
LAMP3	129.4 ± 40.8	181.3 ± 65.5	0.00049	0.0169	129.38 ± 40.84	184.75 ± 63.34	0.00213055	0.0318678
LASS2	1.732.4 ± 191.8	1.537.2 ± 214.2	0.00049	0.0169	1732.43 ± 191.84	1553.43 ± 231.13	0.000348593	0.0123122
LASS6	1.299.1 ± 341.9	1.158.7 ± 267.3	0.00049	0.0169	1299.11 ± 341.90	1137.11 ± 228.47	0.00165648	0.028166
LCN2	1.471.4 ± 546.2	1.143.9 ± 546.3	0.00171	0.0326	1471.41 ± 546.23	1136.00 ± 530.05	0.000417612	0.0133167
LCP1	196.8 ± 73.4	156.9 ± 49.1	0.00171	0.0326	196.83 ± 73.37	161.97 ± 69.28	0.000763249	0.0184137
LDLR	855.8 ± 145.2	1.195.0 ± 187.3	0.00024	0.0133	855.85 ± 145.18	1145.05 ± 194.18	0.000128638	0.00770329
LEPREL2	90.2 ± 17.8	100.9 ± 17.7	0.00244	0.0405	90.17 ± 17.83	104.97 ± 17.81	3.82197e-05	0.00480719
LGALS9B	273.2 ± 85.5	203.6 ± 74.3	0.00024	0.0133	273.20 ± 85.48	194.95 ± 81.65	1.78412e-06	0.00162038
LGALS9C	186.2 ± 58.6	139.0 ± 48.9	0.00049	0.0169	186.20 ± 58.63	134.24 ± 53.71	6.32639e-07	0.00154663
LGR4	841.3 ± 239.0	650.1 ± 211.1	0.00024	0.0133	841.32 ± 238.98	675.61 ± 224.70	0.000233565	0.0100963
LHFP	131.5 ± 43.5	103.5 ± 28.0	0.00049	0.0169	131.48 ± 43.46	111.08 ± 43.16	0.0012019	0.0235105
LIMA1	1.119.1 ± 177.0	868.4 ± 164.9	0.00024	0.0133	1119.13 ± 176.98	908.40 ± 182.26	0.000150433	0.00815247
LITAF	946.5 ± 244.1	817.5 ± 275.8	0.00049	0.0169	946.53 ± 244.14	795.54 ± 241.42	1.88712e-05	0.0034034
LMAN1	2.551.6 ± 449.3	2.941.9 ± 512.9	0.00342	0.0489	2551.57 ± 449.26	3139.86 ± 528.59	4.77938e-06	0.00209952
LMAN2	1.379.9 ± 122.2	1.512.7 ± 116.0	0.00122	0.0267	1379.92 ± 122.19	1513.94 ± 97.39	0.00395661	0.0451064
LMCD1	164.3 ± 42.3	209.9 ± 39.7	0.00024	0.0133	164.31 ± 42.29	225.35 ± 43.36	6.75003e-05	0.00560879
LMNA	164.6 ± 19.7	190.0 ± 22.1	0.00024	0.0133	164.60 ± 19.74	192.79 ± 21.94	0.00239491	0.0340841
LMO4	142.8 ± 44.5	125.9 ± 49.0	0.00049	0.0169	142.77 ± 44.54	123.53 ± 47.03	0.000384533	0.0128758
LNX2	662.0 ± 146.2	553.7 ± 125.4	0.00049	0.0169	662.05 ± 146.15	561.26 ± 124.09	0.000205096	0.00950028
LOC388022	222.9 ± 74.4	286.2 ± 113.9	0.00049	0.0169	222.88 ± 74.36	273.86 ± 109.30	0.00244782	0.0344142
LOC401805	138.1 ± 15.4	116.5 ± 12.2	0.00122	0.0267	138.11 ± 15.38	112.22 ± 15.33	0.000129364	0.00770329
LOC441506	659.5 ± 145.1	748.0 ± 129.3	0.00122	0.0267	659.55 ± 145.07	780.05 ± 134.99	0.000791743	0.0187177
LOC645317	182.6 ± 26.4	217.9 ± 44.8	0.00122	0.0267	182.64 ± 26.42	227.86 ± 27.45	2.35487e-05	0.0039159
LOC732275	51.7 ± 13.7	67.1 ± 15.7	0.00024	0.0133	51.71 ± 13.66	79.72 ± 36.82	0.00190568	0.0302847
LOC93432	69.9 ± 25.8	33.8 ± 17.2	0.00024	0.0133	69.87 ± 25.82	37.80 ± 17.63	4.53728e-05	0.00494215
LPCAT2	114.8 ± 36.5	89.8 ± 26.5	0.00024	0.0133	114.76 ± 36.49	93.34 ± 32.68	0.00211785	0.031791
LPCAT4	106.4 ± 7.3	92.8 ± 10.5	0.00073	0.0204	106.40 ± 7.29	91.83 ± 9.55	0.000250852	0.0104336
LPHN2	332.7 ± 67.8	279.7 ± 50.6	0.00342	0.0489	332.66 ± 67.79	285.83 ± 66.72	0.00320477	0.0402701
LPIN1	566.9 ± 94.1	704.0 ± 92.2	0.00049	0.0169	566.90 ± 94.11	698.43 ± 106.65	0.00117603	0.0232276
LRIG3	267.7 ± 38.3	219.1 ± 40.5	0.00122	0.0267	267.69 ± 38.26	219.73 ± 46.11	0.000706975	0.0176432
LRRC19	36.9 ± 25.7	14.3 ± 11.2	0.00024	0.0133	36.91 ± 25.66	15.80 ± 7.62	0.00108151	0.0221031
LRRN1	57.3 ± 17.6	47.5 ± 15.2	0.00049	0.0169	57.30 ± 17.62	45.39 ± 16.59	0.000940476	0.0205106
LRRTM2	54.0 ± 15.7	82.2 ± 35.9	0.00024	0.0133	54.04 ± 15.71	93.01 ± 37.27	6.41298e-05	0.00549033
LTA4H	1.168.3 ± 126.4	1.080.9 ± 136.9	0.00342	0.0489	1168.35 ± 126.41	1083.12 ± 121.51	0.00108268	0.0221031
LUZP6	991.4 ± 99.0	904.3 ± 66.0	0.00024	0.0133	991.45 ± 99.02	879.72 ± 48.23	0.00182738	0.0295856
LY6E	348.5 ± 112.5	294.3 ± 81.1	0.00049	0.0169	348.46 ± 112.50	292.85 ± 59.92	0.00265089	0.0360107
LYPD1	260.6 ± 99.0	195.8 ± 70.1	0.00049	0.0169	260.64 ± 99.00	195.86 ± 63.18	0.000282879	0.0111144
LYZ	2.767.1 ± 1.646.8	2.015.6 ± 1.719.4	0.00024	0.0133	2767.11 ± 1646.84	2057.69 ± 1556.02	0.000290453	0.0112475
MAEA	541.4 ± 29.9	512.1 ± 32.2	0.00122	0.0267	541.44 ± 29.90	501.22 ± 43.18	0.00261383	0.0357948
MAFK	99.3 ± 13.5	119.5 ± 23.9	0.00122	0.0267	99.33 ± 13.53	115.91 ± 19.89	0.00022971	0.0100654
MAMLD1	88.6 ± 9.3	101.5 ± 13.6	0.00244	0.0405	88.56 ± 9.33	103.95 ± 11.57	0.000984751	0.0209276
MAN2A2	208.4 ± 32.9	182.6 ± 22.6	0.00122	0.0267	208.40 ± 32.91	177.05 ± 22.47	0.00294931	0.0381943
MAN2B2	181.6 ± 20.3	165.0 ± 23.5	0.00024	0.0133	181.57 ± 20.34	155.48 ± 15.14	6.78077e-05	0.00560879
MAOA	286.1 ± 68.8	204.0 ± 58.3	0.00024	0.0133	286.11 ± 68.76	217.63 ± 57.75	0.000152965	0.00824904
MAP1LC3A	207.5 ± 48.4	252.6 ± 70.9	0.00122	0.0267	207.50 ± 48.39	243.36 ± 57.55	0.000202231	0.00948739
MAP2K3	143.1 ± 23.1	187.0 ± 57.7	0.00024	0.0133	143.10 ± 23.10	176.68 ± 37.44	0.000111035	0.00726451
MAP3K1	318.3 ± 62.2	268.8 ± 63.0	0.00024	0.0133	318.35 ± 62.16	275.65 ± 61.65	0.00122765	0.0235907
MAPKAP1	610.6 ± 66.9	568.3 ± 65.6	0.00122	0.0267	610.56 ± 66.95	557.99 ± 80.48	0.00187298	0.029985
MARS	747.6 ± 85.8	869.1 ± 98.7	0.00024	0.0133	747.59 ± 85.81	863.69 ± 111.15	0.000446035	0.0139204
MAT2B	484.0 ± 76.7	410.0 ± 65.9	0.00024	0.0133	484.04 ± 76.74	430.81 ± 81.92	0.00193951	0.0306127
MATN2	166.8 ± 61.6	122.3 ± 20.2	0.00073	0.0204	166.77 ± 61.56	120.68 ± 35.49	0.000535778	0.0153696
MBOAT1	158.9 ± 55.3	128.8 ± 56.2	0.00049	0.0169	158.92 ± 55.31	134.84 ± 56.05	0.00290774	0.0379015
MBOAT4	286.6 ± 105.0	435.2 ± 196.3	0.00049	0.0169	286.61 ± 105.02	449.24 ± 209.10	0.000137531	0.00784295
MCCC1	600.9 ± 111.5	466.7 ± 121.1	0.00024	0.0133	600.93 ± 111.47	477.83 ± 115.54	0.000358146	0.0125105
MED10	352.3 ± 61.5	427.3 ± 71.2	0.00024	0.0133	352.32 ± 61.47	436.60 ± 82.94	2.77931e-05	0.00413837
MED23	358.8 ± 39.0	315.6 ± 46.0	0.00049	0.0169	358.82 ± 38.96	320.10 ± 26.73	0.00103735	0.0215936
MEIS2	611.3 ± 164.8	491.6 ± 143.6	0.00024	0.0133	611.29 ± 164.83	493.29 ± 137.80	0.000652243	0.0168439
MELK	58.3 ± 20.2	33.2 ± 9.8	0.00024	0.0133	58.32 ± 20.24	36.94 ± 17.89	3.06636e-05	0.0042701
METAP1	692.6 ± 71.4	622.3 ± 58.8	0.00122	0.0267	692.65 ± 71.37	627.46 ± 86.18	0.00428903	0.0472636
MFGE8	338.7 ± 87.8	285.5 ± 59.8	0.00073	0.0204	338.75 ± 87.80	272.09 ± 70.06	3.10541e-06	0.0019744
MFSD2	62.0 ± 5.1	71.7 ± 8.1	0.00049	0.0169	62.04 ± 5.11	74.25 ± 8.29	0.000823108	0.0191645
MITF	101.9 ± 16.8	79.5 ± 11.8	0.00024	0.0133	101.93 ± 16.78	85.64 ± 14.31	0.000163308	0.00849524
MLLT11	429.0 ± 175.7	504.8 ± 202.9	0.00244	0.0405	429.02 ± 175.72	511.26 ± 198.10	0.00225485	0.0329212
MMP15	139.6 ± 20.4	125.3 ± 21.4	0.00171	0.0326	139.58 ± 20.41	126.76 ± 20.89	0.00104618	0.0216747
MRFAP1	2.770.4 ± 165.3	2.630.0 ± 165.1	0.00244	0.0405	2770.44 ± 165.29	2620.30 ± 166.06	0.00329303	0.0409819
MSTO1	91.6 ± 13.6	109.9 ± 15.7	0.00049	0.0169	91.56 ± 13.56	109.10 ± 17.79	0.00304312	0.0390048
MTAP	134.3 ± 22.5	117.0 ± 23.7	0.00024	0.0133	134.31 ± 22.46	117.74 ± 23.61	0.00114792	0.0228985
MTHFD2	617.1 ± 203.3	836.7 ± 333.2	0.00049	0.0169	617.06 ± 203.28	825.03 ± 355.68	0.000889703	0.0199752
MTMR12	475.0 ± 119.1	402.1 ± 100.2	0.00024	0.0133	474.95 ± 119.14	406.52 ± 86.35	0.00145114	0.0261137
MUC1	1.057.7 ± 437.2	703.1 ± 427.7	0.00024	0.0133	1057.65 ± 437.15	721.76 ± 420.19	0.000116118	0.00739407
MUC20	554.6 ± 332.3	398.1 ± 296.8	0.00049	0.0169	554.57 ± 332.25	369.24 ± 260.19	1.23811e-05	0.00286753
MUM1L1	145.5 ± 48.0	110.3 ± 38.6	0.00171	0.0326	145.46 ± 47.99	114.38 ± 44.71	0.00129587	0.0244741
MYBBP1A	111.7 ± 6.4	123.1 ± 9.2	0.00122	0.0267	111.67 ± 6.41	120.09 ± 12.98	0.00181518	0.029475
NANS	344.1 ± 38.3	406.4 ± 56.2	0.00342	0.0489	344.08 ± 38.34	428.78 ± 66.89	0.000910347	0.0201508
NCAPD2	283.1 ± 31.7	252.9 ± 33.9	0.00342	0.0489	283.15 ± 31.65	261.59 ± 26.40	0.00200654	0.0311627
NCAPG	56.1 ± 18.8	35.0 ± 11.5	0.00049	0.0169	56.15 ± 18.75	40.66 ± 19.48	0.00200454	0.0311627
NCK2	469.7 ± 108.9	428.2 ± 108.0	0.00342	0.0489	469.66 ± 108.88	419.89 ± 115.36	0.00142409	0.0258319
NCOA4	1.758.2 ± 130.5	1.542.3 ± 113.8	0.00049	0.0169	1758.23 ± 130.49	1562.44 ± 127.63	0.000384704	0.0128758
NDEL1	464.3 ± 59.2	542.4 ± 80.1	0.00342	0.0489	464.32 ± 59.20	556.24 ± 73.98	0.000103596	0.00694928
NDRG2	389.1 ± 101.9	283.6 ± 94.4	0.00049	0.0169	389.10 ± 101.92	299.35 ± 101.23	0.000610574	0.0162841
NEFM	319.4 ± 260.9	531.0 ± 398.4	0.00024	0.0133	319.40 ± 260.94	613.74 ± 444.35	0.000716768	0.0177566
NENF	438.7 ± 64.7	480.4 ± 79.9	0.00073	0.0204	438.68 ± 64.71	477.85 ± 80.50	0.000937779	0.020494
NFIA	193.8 ± 30.6	143.5 ± 27.6	0.00024	0.0133	193.75 ± 30.61	151.47 ± 33.83	0.000659902	0.0169475
NFIB	295.5 ± 118.5	233.0 ± 101.1	0.00024	0.0133	295.49 ± 118.54	246.22 ± 96.87	0.00197566	0.0309338
NFKB2	141.9 ± 28.4	177.4 ± 37.2	0.00049	0.0169	141.89 ± 28.43	179.05 ± 41.47	0.000712143	0.0177451
NFKBIB	168.5 ± 15.9	185.6 ± 26.7	0.00049	0.0169	168.52 ± 15.88	188.28 ± 28.56	0.00277806	0.0369778
NID1	161.7 ± 61.8	122.2 ± 42.6	0.00122	0.0267	161.66 ± 61.78	120.89 ± 53.49	0.000356618	0.0125105
NME2P1	723.2 ± 90.3	789.2 ± 101.3	0.00073	0.0204	723.15 ± 90.33	808.82 ± 127.17	0.0027824	0.0370132
NONO	2.059.1 ± 111.5	1.946.0 ± 105.8	0.00049	0.0169	2059.10 ± 111.45	1797.20 ± 109.35	3.92982e-05	0.00480719
NOTCH2	381.1 ± 126.7	281.3 ± 105.9	0.00024	0.0133	381.10 ± 126.74	294.85 ± 111.74	8.04826e-06	0.00238556
NOTCH3	199.0 ± 32.3	173.3 ± 19.1	0.00049	0.0169	199.05 ± 32.31	167.17 ± 25.86	2.48233e-08	0.000273087
NPC2	1.627.9 ± 275.2	1.450.3 ± 237.2	0.00171	0.0326	1627.93 ± 275.21	1368.84 ± 246.27	7.92225e-06	0.00238556
NPY1R	40.5 ± 21.8	27.1 ± 14.1	0.00024	0.0133	40.53 ± 21.77	31.10 ± 15.73	0.00118317	0.0233268
NQO1	781.2 ± 241.0	548.3 ± 170.5	0.00024	0.0133	781.19 ± 240.97	574.00 ± 208.73	2.57215e-05	0.00401692
NR4A2	90.7 ± 17.7	127.9 ± 32.0	0.00122	0.0267	90.69 ± 17.66	149.33 ± 41.65	6.21057e-05	0.00549033
NR5A2	1.120.8 ± 459.3	772.7 ± 363.5	0.00049	0.0169	1120.82 ± 459.27	822.12 ± 384.52	0.000423082	0.0134141
NRF1	93.6 ± 5.9	104.4 ± 12.0	0.00171	0.0326	93.58 ± 5.85	103.98 ± 7.42	0.000490795	0.0147092
NRIP1	418.2 ± 56.2	360.8 ± 63.0	0.00024	0.0133	418.22 ± 56.24	367.54 ± 54.42	0.000532883	0.0153465
NRP1	659.0 ± 159.7	548.1 ± 148.6	0.00244	0.0405	659.00 ± 159.67	530.63 ± 137.71	0.0029231	0.038034
NTN4	482.7 ± 141.5	418.8 ± 134.1	0.00024	0.0133	482.70 ± 141.50	413.45 ± 142.24	9.21267e-05	0.00645371
NUCB2	1.764.5 ± 455.8	2.061.0 ± 566.5	0.00049	0.0169	1764.54 ± 455.85	2192.48 ± 461.81	9.1361e-06	0.00248169
NUDT12	584.7 ± 95.8	519.5 ± 120.1	0.00073	0.0204	584.69 ± 95.79	517.12 ± 87.58	0.00109405	0.0222434
NUF2	34.3 ± 10.7	22.1 ± 4.7	0.00049	0.0169	34.34 ± 10.66	23.46 ± 11.55	0.000156525	0.00832177
OCIAD2	527.4 ± 83.2	573.5 ± 90.6	0.00049	0.0169	527.44 ± 83.18	614.38 ± 78.32	6.61708e-06	0.0023185
ODC1	1.404.5 ± 230.2	1.969.9 ± 404.6	0.00024	0.0133	1404.54 ± 230.16	1786.50 ± 419.27	0.00190816	0.0302847
ODZ4	63.0 ± 10.1	75.6 ± 13.5	0.00024	0.0133	63.01 ± 10.11	74.46 ± 14.48	0.0011958	0.0234706
ONECUT2	150.6 ± 30.4	122.0 ± 18.3	0.00122	0.0267	150.61 ± 30.37	119.07 ± 21.26	0.000329457	0.0120213
OSTC	1.026.9 ± 67.3	1.197.1 ± 130.8	0.00024	0.0133	1026.92 ± 67.30	1252.20 ± 127.33	8.33709e-06	0.00238556
OSTF1	567.7 ± 69.2	491.3 ± 61.4	0.00024	0.0133	567.72 ± 69.17	495.28 ± 58.64	0.00207379	0.0315419
P2RX7	26.2 ± 6.8	33.0 ± 7.2	0.00244	0.0405	26.24 ± 6.85	31.64 ± 6.87	0.000192077	0.00924701
PAH	107.7 ± 37.3	79.8 ± 34.3	0.00024	0.0133	107.68 ± 37.35	88.43 ± 33.91	0.00188721	0.0301113
PAK3	810.6 ± 277.9	972.5 ± 333.9	0.00171	0.0326	810.64 ± 277.92	1009.38 ± 347.19	0.000505528	0.0148108
PAM	3.515.3 ± 1.199.5	4.440.6 ± 1.304.3	0.00024	0.0133	3515.33 ± 1199.51	5034.55 ± 1465.31	2.53623e-06	0.00181138
PAPSS1	451.3 ± 37.9	399.4 ± 54.8	0.00024	0.0133	451.27 ± 37.90	410.44 ± 44.30	0.00249332	0.0348246
PARP4	743.6 ± 138.4	638.3 ± 113.5	0.00024	0.0133	743.58 ± 138.43	624.22 ± 114.71	2.40353e-05	0.00391731
PBK	41.0 ± 15.4	24.8 ± 9.5	0.00073	0.0204	41.01 ± 15.41	26.58 ± 12.87	0.000283624	0.0111238
PBX1	424.7 ± 40.8	333.7 ± 37.6	0.00024	0.0133	424.73 ± 40.79	346.62 ± 54.82	0.00054893	0.0154251
PCDH18	127.6 ± 70.5	86.7 ± 39.3	0.00049	0.0169	127.64 ± 70.46	95.43 ± 59.84	0.00013262	0.00773484
PCK1	192.3 ± 120.1	333.5 ± 175.2	0.00244	0.0405	192.35 ± 120.09	695.52 ± 442.78	6.76893e-06	0.0023185
PCNA	444.6 ± 61.0	377.0 ± 76.1	0.00024	0.0133	444.61 ± 60.97	390.11 ± 82.67	0.00171035	0.0286864
PCSK1	4.238.9 ± 1.705.4	5.381.2 ± 1.765.8	0.00024	0.0133	4238.90 ± 1705.37	6149.06 ± 1841.45	1.1737e-06	0.00162038
PCSK5	89.4 ± 25.1	72.9 ± 20.9	0.00244	0.0405	89.36 ± 25.11	73.38 ± 15.99	0.00264402	0.0360008
PCYOX1	938.7 ± 128.2	829.2 ± 129.5	0.00073	0.0204	938.68 ± 128.24	826.59 ± 81.42	0.000395589	0.0129637
PDGFD	436.5 ± 182.5	263.3 ± 147.5	0.00073	0.0204	436.45 ± 182.46	293.87 ± 142.06	0.00284156	0.0373996
PDGFRA	199.3 ± 131.4	124.0 ± 62.3	0.00024	0.0133	199.29 ± 131.41	157.62 ± 147.00	0.00220792	0.0324731
PDGFRB	444.2 ± 216.3	347.8 ± 152.3	0.00122	0.0267	444.18 ± 216.34	346.38 ± 184.19	2.98964e-05	0.00421832
PDIA4	1.116.8 ± 189.9	1.286.6 ± 256.1	0.00049	0.0169	1116.75 ± 189.91	1348.65 ± 292.70	0.000588825	0.0160541
PDK4	2.530.7 ± 813.9	3.706.4 ± 941.1	0.00024	0.0133	2530.66 ± 813.87	4059.72 ± 1042.93	2.46766e-06	0.00181138
PDLIM1	541.7 ± 68.9	484.6 ± 60.7	0.00122	0.0267	541.72 ± 68.86	489.58 ± 68.92	0.00261757	0.0357948
PDLIM5	1.017.1 ± 78.9	854.1 ± 72.5	0.00024	0.0133	1017.14 ± 78.87	876.63 ± 98.74	0.000411569	0.0132388
PDZRN4	11.2 ± 1.2	13.1 ± 2.6	0.00244	0.0405	11.17 ± 1.20	12.75 ± 1.99	0.0039339	0.0449173
PEG10	1.730.3 ± 578.0	2.743.2 ± 1.037.7	0.00024	0.0133	1730.26 ± 577.98	3047.03 ± 1173.05	2.2832e-05	0.00386432
PER3	137.7 ± 42.7	122.7 ± 40.4	0.00122	0.0267	137.72 ± 42.70	103.58 ± 25.49	0.000602536	0.016207
PGM3	781.9 ± 86.8	936.6 ± 110.5	0.00122	0.0267	781.95 ± 86.79	1042.90 ± 142.68	3.55255e-06	0.001996
PHF17	250.6 ± 27.5	278.2 ± 45.0	0.00122	0.0267	250.61 ± 27.47	282.51 ± 43.11	0.00197813	0.0309338
PIGG	186.1 ± 19.0	162.0 ± 10.7	0.00244	0.0405	186.14 ± 19.02	164.92 ± 12.50	0.00141074	0.0257164
PIGR	1.340.2 ± 667.6	766.6 ± 525.4	0.00024	0.0133	1340.22 ± 667.61	760.67 ± 467.55	4.04692e-05	0.00480719
PIGS	302.5 ± 22.9	270.1 ± 27.6	0.00122	0.0267	302.48 ± 22.90	270.87 ± 26.72	0.00234664	0.0336365
PIK3AP1	379.7 ± 126.1	276.1 ± 111.3	0.00073	0.0204	379.71 ± 126.07	295.19 ± 110.09	1.21717e-05	0.00286753
PIK3C2B	82.7 ± 9.4	69.6 ± 8.7	0.00049	0.0169	82.66 ± 9.43	70.20 ± 6.94	0.000121792	0.00750622
PIK3R1	380.2 ± 80.4	317.7 ± 84.4	0.00049	0.0169	380.20 ± 80.42	313.70 ± 71.89	0.000243679	0.0103538
PIP5K1B	65.4 ± 15.8	51.8 ± 15.4	0.00049	0.0169	65.39 ± 15.77	54.07 ± 12.68	0.00132733	0.0248128
PKHD1	70.7 ± 28.2	49.3 ± 19.3	0.00024	0.0133	70.68 ± 28.15	53.03 ± 19.23	0.00405441	0.0458648
PKP2	364.3 ± 99.6	320.9 ± 84.5	0.00049	0.0169	364.30 ± 99.57	316.19 ± 54.89	0.00345886	0.0419026
PLA2G10	30.1 ± 18.1	17.4 ± 9.2	0.00171	0.0326	30.11 ± 18.15	18.14 ± 11.23	1.65242e-05	0.00324414
PLA2G7	236.0 ± 83.7	167.5 ± 81.5	0.00342	0.0489	236.02 ± 83.67	166.66 ± 87.54	0.00305436	0.0390945
PLAT	692.9 ± 431.5	392.8 ± 163.5	0.00024	0.0133	692.91 ± 431.48	450.98 ± 299.62	0.0012324	0.0236613
PLAU	293.5 ± 159.2	193.4 ± 72.6	0.00122	0.0267	293.51 ± 159.19	213.66 ± 133.88	0.000239721	0.0102417
PLBD1	162.8 ± 25.2	134.0 ± 32.8	0.00244	0.0405	162.75 ± 25.20	139.33 ± 28.66	0.0019091	0.0302847
PLD1	373.2 ± 95.6	261.0 ± 81.4	0.00024	0.0133	373.23 ± 95.64	281.19 ± 85.53	3.20055e-05	0.00435709
PLEKHA6	279.8 ± 67.5	234.1 ± 60.9	0.00049	0.0169	279.76 ± 67.53	230.06 ± 40.99	0.000885259	0.0199569
PLEKHB1	289.6 ± 80.3	233.2 ± 87.4	0.00073	0.0204	289.57 ± 80.28	227.00 ± 78.82	0.00072992	0.0179338
PLK3	85.1 ± 12.9	98.1 ± 12.3	0.00024	0.0133	85.07 ± 12.88	97.36 ± 14.36	0.00088901	0.0199752
PLK4	26.5 ± 6.5	20.5 ± 4.9	0.00073	0.0204	26.51 ± 6.52	20.51 ± 5.67	0.0018739	0.029985
PLP2	1.125.5 ± 230.0	1.304.6 ± 206.0	0.00024	0.0133	1125.53 ± 229.95	1244.16 ± 213.69	0.00206853	0.0315419
PLS3	826.5 ± 211.2	673.7 ± 174.4	0.00024	0.0133	826.47 ± 211.22	719.99 ± 214.89	0.0029931	0.0385486
PLSCR4	235.6 ± 63.0	188.2 ± 50.6	0.00024	0.0133	235.59 ± 63.01	199.03 ± 57.48	0.00120566	0.0235173
PLXDC2	145.5 ± 38.3	107.9 ± 30.3	0.00024	0.0133	145.54 ± 38.32	118.93 ± 33.08	0.00165031	0.0280826
PLXNB2	508.0 ± 71.9	463.4 ± 74.3	0.00342	0.0489	508.00 ± 71.89	460.17 ± 68.11	0.00232124	0.0334379
PMAIP1	80.1 ± 24.2	110.2 ± 58.1	0.00024	0.0133	80.07 ± 24.21	111.36 ± 66.40	0.00338063	0.041446
PMEPA1	882.0 ± 363.2	703.1 ± 264.4	0.00049	0.0169	882.00 ± 363.19	696.98 ± 256.62	0.0015728	0.0273345
PMM2	196.2 ± 26.9	230.0 ± 35.3	0.00122	0.0267	196.19 ± 26.87	248.98 ± 36.99	1.23732e-05	0.00286753
PODXL	238.8 ± 67.2	204.1 ± 69.4	0.00122	0.0267	238.83 ± 67.23	202.79 ± 75.33	0.000845818	0.0194667
POF1B	208.2 ± 72.6	154.8 ± 61.1	0.00024	0.0133	208.15 ± 72.60	165.20 ± 62.65	0.00257419	0.0355385
POLR3D	154.5 ± 18.7	189.1 ± 27.0	0.00073	0.0204	154.52 ± 18.69	194.99 ± 26.09	4.52249e-06	0.00209952
POP7	155.0 ± 11.0	169.6 ± 12.0	0.00024	0.0133	155.04 ± 10.99	169.67 ± 15.23	0.00470214	0.0497989
PPAP2A	167.4 ± 25.0	137.1 ± 24.8	0.00024	0.0133	167.36 ± 25.02	146.10 ± 31.54	0.00257733	0.0355444
PPAP2B	409.7 ± 77.0	342.4 ± 92.7	0.00244	0.0405	409.68 ± 77.04	334.33 ± 87.74	0.00050233	0.0147564
PPARGC1A	177.5 ± 53.3	131.7 ± 41.1	0.00342	0.0489	177.49 ± 53.30	139.91 ± 46.74	0.0046521	0.049616
PPIB	2.276.3 ± 121.4	2.583.1 ± 216.6	0.00049	0.0169	2276.29 ± 121.36	2571.74 ± 287.17	0.000758811	0.0183802
PPIC	953.9 ± 236.5	758.1 ± 239.4	0.00024	0.0133	953.89 ± 236.47	809.21 ± 263.55	0.000720347	0.0177961
PPIL6	72.8 ± 10.5	90.5 ± 21.2	0.00122	0.0267	72.84 ± 10.47	96.88 ± 20.87	0.000108278	0.00715431
PPM1K	142.0 ± 56.5	190.0 ± 74.4	0.00049	0.0169	142.00 ± 56.55	206.37 ± 69.46	1.61825e-05	0.00324414
PPP1CC	2.742.8 ± 225.9	2.473.2 ± 205.2	0.00073	0.0204	2742.80 ± 225.95	2554.85 ± 145.89	0.00239104	0.0340511
PPP1R15A	194.6 ± 36.2	319.2 ± 109.8	0.00024	0.0133	194.59 ± 36.19	309.26 ± 109.51	0.000193242	0.00924701
PPP2R5D	233.6 ± 19.6	211.9 ± 18.2	0.00049	0.0169	233.63 ± 19.58	212.09 ± 25.37	0.00294849	0.0381943
PRDX1	2.047.1 ± 249.6	1.811.9 ± 241.1	0.00049	0.0169	2047.10 ± 249.61	1885.91 ± 291.76	0.00101199	0.0213279
PRICKLE1	140.8 ± 42.9	105.2 ± 25.2	0.00024	0.0133	140.75 ± 42.93	106.42 ± 30.48	4.43251e-05	0.00490082
PRIM1	203.0 ± 27.6	169.4 ± 38.7	0.00342	0.0489	203.04 ± 27.62	174.89 ± 26.69	0.00280189	0.0371776
PRKAA1	882.9 ± 74.3	758.5 ± 112.1	0.00024	0.0133	882.87 ± 74.33	774.04 ± 112.26	0.00358482	0.0426812
PRKAR2B	262.5 ± 67.9	216.5 ± 67.8	0.00342	0.0489	262.52 ± 67.86	210.04 ± 56.51	0.00311981	0.0396081
PRKCD	220.6 ± 29.7	194.9 ± 31.0	0.00073	0.0204	220.63 ± 29.70	184.09 ± 27.72	1.98842e-06	0.00162038
PROM1	733.6 ± 336.5	584.7 ± 311.9	0.00342	0.0489	733.56 ± 336.53	586.30 ± 286.76	0.00161079	0.027667
PRRG1	167.2 ± 32.4	135.6 ± 24.2	0.00024	0.0133	167.15 ± 32.38	141.73 ± 26.10	0.000609604	0.0162841
PRRG4	191.2 ± 68.1	165.3 ± 63.0	0.00171	0.0326	191.17 ± 68.12	173.67 ± 66.13	0.00135332	0.0251404
PRSS23	341.0 ± 57.9	280.9 ± 63.4	0.00171	0.0326	341.04 ± 57.94	252.78 ± 44.39	6.77415e-06	0.0023185
PTDSS1	516.5 ± 68.8	436.2 ± 71.1	0.00024	0.0133	516.45 ± 68.77	444.52 ± 74.26	0.00214914	0.0319872
PTGFRN	433.6 ± 64.2	358.0 ± 65.7	0.00049	0.0169	433.55 ± 64.19	368.03 ± 76.25	4.93119e-05	0.00510717
PTMA	4.921.7 ± 569.5	4.492.5 ± 547.7	0.00024	0.0133	4921.68 ± 569.45	4298.65 ± 516.11	1.98018e-06	0.00162038
PTPRG	109.8 ± 22.0	93.9 ± 18.0	0.00024	0.0133	109.83 ± 22.03	96.10 ± 17.05	0.00361019	0.042846
PTPRK	539.2 ± 128.3	458.1 ± 118.9	0.00024	0.0133	539.22 ± 128.28	468.15 ± 126.58	0.000801222	0.0188142
PTPRN	1.125.9 ± 589.6	1.322.5 ± 615.0	0.00122	0.0267	1125.88 ± 589.59	1265.95 ± 545.57	0.00445063	0.0483341
PTPRS	144.8 ± 8.7	122.9 ± 9.7	0.00024	0.0133	144.78 ± 8.74	122.52 ± 7.86	1.95612e-09	4.30395e-05
PXDN	319.5 ± 149.3	235.8 ± 69.4	0.00244	0.0405	319.54 ± 149.34	233.85 ± 91.93	0.000229382	0.0100654
PXMP2	229.5 ± 35.5	205.4 ± 28.6	0.00244	0.0405	229.52 ± 35.47	198.72 ± 29.25	0.00188487	0.0300956
RAB2B	254.6 ± 40.5	283.8 ± 53.0	0.00342	0.0489	254.63 ± 40.50	289.32 ± 48.92	0.00243563	0.0343988
RAB3B	345.3 ± 149.5	467.6 ± 166.1	0.00049	0.0169	345.34 ± 149.45	524.37 ± 182.83	6.28306e-05	0.00549033
RAB5A	1.519.0 ± 161.4	1.632.5 ± 163.2	0.00073	0.0204	1519.03 ± 161.44	1688.59 ± 161.24	0.000386239	0.0128758
RAB7L1	500.6 ± 113.7	457.6 ± 118.7	0.00342	0.0489	500.63 ± 113.73	426.89 ± 87.69	0.0020652	0.0315377
RACGAP1	130.4 ± 14.5	110.5 ± 16.7	0.00024	0.0133	130.43 ± 14.51	114.91 ± 15.57	0.000732316	0.017963
RAD51AP1	26.7 ± 6.8	19.6 ± 5.2	0.00073	0.0204	26.68 ± 6.79	20.37 ± 6.61	0.000937961	0.020494
RAG1AP1	517.9 ± 48.9	593.1 ± 48.7	0.00024	0.0133	517.95 ± 48.89	634.56 ± 67.22	7.02144e-05	0.00574309
RARB	83.4 ± 20.4	51.8 ± 17.7	0.00024	0.0133	83.38 ± 20.35	56.33 ± 26.66	0.000475743	0.0144779
RARRES3	86.6 ± 24.9	68.6 ± 14.5	0.00342	0.0489	86.61 ± 24.86	70.66 ± 11.66	0.00390977	0.0448185
RASSF1	112.9 ± 14.3	141.4 ± 26.5	0.00171	0.0326	112.95 ± 14.25	138.88 ± 20.28	0.00135514	0.0251404
RBM47	1.112.2 ± 121.3	988.7 ± 146.7	0.00342	0.0489	1112.17 ± 121.31	990.73 ± 129.07	0.00361645	0.042846
RBPMS	315.8 ± 98.2	248.6 ± 86.1	0.00024	0.0133	315.84 ± 98.17	255.83 ± 78.12	7.14439e-05	0.00579002
RCAN1	374.3 ± 133.5	519.7 ± 256.1	0.00024	0.0133	374.31 ± 133.52	471.68 ± 245.25	0.00257829	0.0355444
RCBTB2	133.8 ± 38.4	114.5 ± 29.4	0.00024	0.0133	133.80 ± 38.41	110.08 ± 22.33	0.000623535	0.0164107
RCN2	760.6 ± 83.4	643.5 ± 90.8	0.00024	0.0133	760.58 ± 83.36	655.23 ± 120.16	0.00333548	0.0412807
RDBP	214.1 ± 22.3	245.4 ± 14.0	0.00122	0.0267	214.05 ± 22.33	246.87 ± 24.46	0.00054848	0.0154251
RDH10	414.6 ± 78.7	338.5 ± 96.4	0.00049	0.0169	414.56 ± 78.69	344.96 ± 75.77	0.000566718	0.0156846
RECK	131.6 ± 26.9	108.7 ± 18.9	0.00342	0.0489	131.57 ± 26.93	115.44 ± 25.94	0.00240241	0.0341026
REEP6	186.7 ± 59.2	163.7 ± 47.4	0.00171	0.0326	186.71 ± 59.15	156.65 ± 50.02	0.000673345	0.0171275
RERG	99.4 ± 34.5	68.1 ± 19.5	0.00024	0.0133	99.43 ± 34.45	70.80 ± 22.86	0.000389556	0.0128758
REST	315.8 ± 87.3	272.6 ± 97.2	0.00342	0.0489	315.77 ± 87.31	270.56 ± 85.39	0.00030491	0.0115033
RFTN1	68.6 ± 11.2	61.0 ± 6.3	0.00024	0.0133	68.56 ± 11.23	61.15 ± 8.75	0.00081233	0.0190141
RFTN2	52.0 ± 19.2	34.8 ± 12.4	0.00171	0.0326	51.98 ± 19.21	40.86 ± 25.69	0.00171177	0.0286864
RGL1	274.4 ± 70.5	231.9 ± 61.1	0.00049	0.0169	274.38 ± 70.47	223.47 ± 49.27	4.19587e-05	0.00480831
RGNEF	169.2 ± 32.0	147.9 ± 33.9	0.00244	0.0405	169.23 ± 31.98	151.34 ± 36.44	0.00290104	0.0378365
RGS17	163.9 ± 30.8	205.8 ± 51.1	0.00073	0.0204	163.95 ± 30.79	204.94 ± 37.66	4.38807e-05	0.00487759
RGS7	131.0 ± 56.5	164.1 ± 67.7	0.00122	0.0267	130.98 ± 56.50	167.64 ± 60.08	0.000381153	0.0128758
RGS9	513.1 ± 255.0	664.2 ± 307.9	0.00342	0.0489	513.12 ± 255.02	797.85 ± 338.91	4.10502e-05	0.00480719
RHOJ	175.0 ± 79.0	122.1 ± 47.0	0.00342	0.0489	174.99 ± 78.96	122.56 ± 58.58	0.000201509	0.00947372
RIPPLY2	45.7 ± 9.5	53.0 ± 9.9	0.00024	0.0133	45.73 ± 9.47	55.75 ± 8.06	8.34239e-05	0.00619428
RNASEL	217.9 ± 20.8	176.3 ± 29.2	0.00049	0.0169	217.88 ± 20.79	178.06 ± 21.49	6.451e-06	0.0023185
RNPEP	671.0 ± 84.3	595.0 ± 85.9	0.00073	0.0204	670.95 ± 84.26	594.82 ± 86.54	0.000595169	0.0161073
RNU1A	829.9 ± 512.1	1.478.1 ± 993.3	0.00024	0.0133	829.92 ± 512.12	1189.21 ± 633.63	0.000324082	0.0119374
ROGDI	250.6 ± 18.9	223.5 ± 24.9	0.00073	0.0204	250.60 ± 18.94	217.77 ± 31.97	0.00187733	0.029997
RPL10	1.295.4 ± 390.3	1.482.5 ± 342.3	0.00024	0.0133	1295.40 ± 390.30	1449.95 ± 353.88	0.00209516	0.0317391
RPL18A	532.4 ± 155.4	587.8 ± 122.2	0.00171	0.0326	532.39 ± 155.38	601.54 ± 127.46	0.00468202	0.0497663
RPL21	2.908.7 ± 346.6	3.147.3 ± 212.5	0.00244	0.0405	2832.91 ± 348.83	3205.51 ± 214.83	0.000412626	0.0132388
RPL21P20	121.2 ± 23.4	139.4 ± 14.7	0.00122	0.0267	121.21 ± 23.37	149.77 ± 22.62	0.00374592	0.0437607
RPL24	3.145.3 ± 364.1	3.459.5 ± 387.4	0.00024	0.0133	3145.28 ± 364.12	3361.03 ± 351.16	0.000603817	0.0162216
RPL29P12	64.5 ± 12.2	72.3 ± 9.0	0.00024	0.0133	64.47 ± 12.23	75.78 ± 13.88	0.00299419	0.0385486
RPL36AL	2.386.2 ± 257.7	2.705.0 ± 202.3	0.00122	0.0267	2386.22 ± 257.66	2731.65 ± 217.61	0.000126542	0.00764362
RPL38	1.817.2 ± 165.0	1.976.5 ± 162.1	0.00049	0.0169	1817.18 ± 164.95	1927.51 ± 171.46	0.00453758	0.0489163
RPL41	112.1 ± 18.0	137.9 ± 23.4	0.00024	0.0133	5182.74 ± 350.48	5429.46 ± 344.96	0.000427239	0.0135062
RPS10	2.078.3 ± 345.6	2.216.3 ± 308.5	0.00073	0.0204	2078.29 ± 345.60	2201.00 ± 302.83	0.00139032	0.0254895
RPS17	3.868.7 ± 407.8	4.144.2 ± 333.9	0.00049	0.0169	3868.72 ± 407.76	4112.11 ± 298.11	0.000634936	0.0166312
RPS18P12	84.1 ± 16.7	98.3 ± 18.0	0.00024	0.0133	84.06 ± 16.74	96.35 ± 17.80	0.000926651	0.0203886
RPS18P5	1.602.7 ± 356.3	1.876.5 ± 301.5	0.00024	0.0133	1602.67 ± 356.28	1904.90 ± 473.93	7.85272e-06	0.00238556
RPS18P9	322.3 ± 59.2	363.8 ± 50.0	0.00171	0.0326	322.33 ± 59.25	372.76 ± 54.07	1.84002e-05	0.0034021
RPS20	3.003.3 ± 426.7	3.213.7 ± 353.4	0.00122	0.0267	3003.35 ± 426.73	3190.33 ± 389.38	0.00416819	0.0465574
RPS25	930.5 ± 116.9	1.053.2 ± 164.6	0.00024	0.0133	930.47 ± 116.94	1036.76 ± 134.88	0.00102194	0.0214144
RPS27	4.817.9 ± 600.3	5.109.5 ± 608.5	0.00171	0.0326	2583.70 ± 383.80	2735.84 ± 297.29	0.00437965	0.0477992
RPS7	507.0 ± 86.8	553.4 ± 71.2	0.00342	0.0489	507.02 ± 86.82	566.25 ± 86.63	6.71672e-05	0.00560879
RRM2	71.8 ± 23.7	47.7 ± 15.1	0.00342	0.0489	71.83 ± 23.67	51.80 ± 23.44	0.00151279	0.026668
RSAD2	101.4 ± 30.6	229.5 ± 87.3	0.00122	0.0267	101.42 ± 30.56	192.72 ± 76.91	0.000525519	0.0152141
RSPH4A	27.9 ± 6.1	35.2 ± 12.1	0.00244	0.0405	27.93 ± 6.12	40.36 ± 17.40	0.00200626	0.0311627
RUFY1	563.4 ± 75.2	504.1 ± 78.0	0.00244	0.0405	563.43 ± 75.16	489.32 ± 79.14	0.00195516	0.0307495
S1PR3	119.5 ± 21.5	102.8 ± 14.7	0.00122	0.0267	119.52 ± 21.45	103.02 ± 14.09	0.00122475	0.0235907
SAMD3	139.4 ± 91.4	167.2 ± 90.6	0.00049	0.0169	139.40 ± 91.39	169.85 ± 79.47	0.000959568	0.0206786
SAMD5	234.1 ± 78.4	291.6 ± 109.8	0.00024	0.0133	234.08 ± 78.44	289.70 ± 105.42	6.97705e-05	0.00573893
SAMD9	154.9 ± 38.0	117.5 ± 27.5	0.00024	0.0133	154.90 ± 37.96	120.79 ± 31.51	0.000232044	0.0100654
SAMD9L	38.7 ± 10.8	27.7 ± 9.3	0.00024	0.0133	38.69 ± 10.76	29.13 ± 7.23	6.83946e-06	0.0023185
SCAMP3	488.6 ± 31.2	532.7 ± 40.7	0.00073	0.0204	488.60 ± 31.24	529.83 ± 43.97	0.00234019	0.0335659
SCD	1.812.8 ± 773.8	2.853.2 ± 1.023.9	0.00024	0.0133	1812.79 ± 773.78	2700.26 ± 1055.30	9.74716e-06	0.00258202
SCD5	205.9 ± 57.3	179.7 ± 58.0	0.00049	0.0169	205.95 ± 57.25	158.99 ± 24.12	4.925e-05	0.00510717
SCN9A	99.3 ± 21.3	81.3 ± 20.4	0.00024	0.0133	99.28 ± 21.26	85.31 ± 18.15	0.0015326	0.0268799
SCNN1A	212.3 ± 79.8	149.7 ± 66.6	0.00024	0.0133	212.31 ± 79.80	160.76 ± 59.42	7.71334e-05	0.00591333
SCNN1G	88.1 ± 41.7	63.4 ± 28.3	0.00122	0.0267	88.06 ± 41.70	61.10 ± 15.47	0.000950102	0.0206084
SCTR	141.4 ± 41.8	104.5 ± 38.2	0.00122	0.0267	141.36 ± 41.83	105.50 ± 38.35	0.000863582	0.0197105
SDC1	253.2 ± 53.3	217.8 ± 43.9	0.00244	0.0405	253.16 ± 53.27	220.65 ± 43.10	0.00108293	0.0221031
SDF2L1	248.9 ± 43.7	334.4 ± 58.5	0.00024	0.0133	248.86 ± 43.71	352.99 ± 89.43	0.000108883	0.00717277
SEC13	374.2 ± 43.9	422.4 ± 55.3	0.00244	0.0405	374.23 ± 43.91	439.81 ± 72.18	0.000982734	0.0209116
SEC23B	1.213.3 ± 222.8	1.369.8 ± 214.9	0.00073	0.0204	1213.33 ± 222.81	1437.41 ± 249.37	2.57742e-05	0.00401692
SEC24D	598.9 ± 145.2	726.1 ± 161.3	0.00049	0.0169	598.86 ± 145.16	783.87 ± 179.07	5.16031e-06	0.00218346
SEC61A1	1.311.2 ± 102.0	1.462.1 ± 90.7	0.00024	0.0133	1311.17 ± 101.97	1529.26 ± 182.21	0.000500849	0.0147523
SEC61G	1.051.7 ± 124.9	1.231.1 ± 186.6	0.00024	0.0133	1051.68 ± 124.93	1308.75 ± 126.86	1.01837e-06	0.00162038
SELENBP1	257.1 ± 55.0	208.3 ± 50.0	0.00171	0.0326	257.06 ± 54.97	203.53 ± 43.15	0.000281177	0.011097
SELK	631.4 ± 68.4	736.3 ± 46.4	0.00122	0.0267	631.42 ± 68.43	794.28 ± 119.79	4.85433e-06	0.00209952
SELS	209.8 ± 15.2	261.8 ± 45.2	0.00171	0.0326	209.80 ± 15.24	271.81 ± 41.09	4.98571e-05	0.00510717
SEMA6A	202.4 ± 59.3	158.2 ± 59.7	0.00024	0.0133	202.44 ± 59.26	158.95 ± 60.50	0.000301719	0.0114458
SEPP1	268.4 ± 53.9	192.0 ± 66.5	0.00049	0.0169	268.38 ± 53.92	207.74 ± 57.43	0.00113627	0.0227786
SEPT9	166.2 ± 42.9	142.2 ± 35.2	0.00024	0.0133	166.24 ± 42.87	141.24 ± 37.63	0.000423105	0.0134141
SERINC5	351.1 ± 82.9	292.1 ± 96.2	0.00073	0.0204	351.12 ± 82.85	287.05 ± 69.43	1.63059e-05	0.00324414
SERPINA5	835.9 ± 372.2	442.1 ± 206.1	0.00024	0.0133	835.90 ± 372.16	472.74 ± 218.66	0.000286857	0.0111907
SERPINA6	269.5 ± 104.9	167.8 ± 96.2	0.00024	0.0133	269.46 ± 104.88	172.68 ± 86.16	0.000956559	0.020634
SERPING1	865.5 ± 339.2	698.6 ± 342.3	0.00171	0.0326	865.51 ± 339.24	735.23 ± 328.93	0.00322448	0.0403794
SESTD1	560.3 ± 62.9	495.8 ± 65.3	0.00024	0.0133	560.26 ± 62.87	490.71 ± 80.93	0.00149708	0.0264786
SEZ6L2	297.2 ± 84.4	329.1 ± 97.4	0.00049	0.0169	297.22 ± 84.35	327.88 ± 89.17	0.000277423	0.0109784
SF3B5	492.3 ± 68.6	569.5 ± 64.7	0.00024	0.0133	492.31 ± 68.62	584.07 ± 52.59	0.00151505	0.026668
SGK1	158.0 ± 51.7	114.3 ± 44.9	0.00073	0.0204	158.01 ± 51.69	115.46 ± 42.31	0.00291065	0.0379168
SGMS2	475.3 ± 80.7	609.6 ± 150.3	0.00171	0.0326	475.33 ± 80.72	711.39 ± 194.68	9.06713e-06	0.00248169
SH2D4A	174.5 ± 54.7	144.0 ± 50.9	0.00024	0.0133	174.46 ± 54.68	144.44 ± 48.73	5.13932e-05	0.00512299
SH3BP5	84.6 ± 11.5	103.3 ± 17.0	0.00024	0.0133	84.63 ± 11.46	100.31 ± 20.42	0.00318069	0.0400591
SHCBP1	71.5 ± 38.5	38.1 ± 8.6	0.00024	0.0133	71.46 ± 38.49	44.04 ± 27.79	0.000163322	0.00849524
SHFM1	1.366.3 ± 59.9	1.448.1 ± 97.0	0.00122	0.0267	1366.32 ± 59.91	1493.22 ± 63.59	1.55068e-05	0.00324414
SHMT1	68.6 ± 16.0	52.3 ± 9.5	0.00024	0.0133	68.59 ± 16.04	57.27 ± 15.48	0.00402041	0.0455739
SHMT2	548.7 ± 125.7	643.2 ± 157.6	0.00049	0.0169	548.68 ± 125.66	624.53 ± 134.40	0.00258198	0.0355517
SHROOM3	163.3 ± 38.2	122.7 ± 28.7	0.00024	0.0133	163.32 ± 38.15	132.94 ± 31.20	0.000828157	0.019221
SIAE	602.2 ± 95.5	505.2 ± 115.3	0.00024	0.0133	602.17 ± 95.46	512.46 ± 108.32	0.00142458	0.0258319
SIK1	183.6 ± 20.7	206.1 ± 30.8	0.00024	0.0133	183.57 ± 20.67	199.19 ± 26.25	0.00244254	0.0344142
SIL1	409.8 ± 111.6	529.8 ± 150.3	0.00122	0.0267	409.80 ± 111.61	566.18 ± 163.19	9.23509e-05	0.00645371
SKP2	157.9 ± 17.7	131.5 ± 18.3	0.00073	0.0204	157.92 ± 17.72	138.04 ± 16.55	0.00339968	0.0415501
SLC12A2	528.7 ± 127.5	421.8 ± 118.7	0.00024	0.0133	528.66 ± 127.49	436.95 ± 122.26	0.00112975	0.0227213
SLC15A1	252.0 ± 103.3	185.4 ± 95.6	0.00049	0.0169	251.99 ± 103.32	189.88 ± 93.00	0.000598605	0.0161407
SLC16A5	75.5 ± 21.2	64.9 ± 17.5	0.00244	0.0405	75.51 ± 21.17	64.13 ± 13.92	0.00269679	0.0363134
SLC16A7	411.4 ± 151.2	308.9 ± 128.7	0.00024	0.0133	411.43 ± 151.16	333.31 ± 142.06	0.00160909	0.0276651
SLC17A4	60.0 ± 25.4	40.1 ± 17.8	0.00049	0.0169	60.03 ± 25.39	39.83 ± 15.00	0.00171899	0.0287194
SLC18A2	259.9 ± 109.8	350.7 ± 172.7	0.00171	0.0326	259.92 ± 109.79	421.26 ± 215.61	2.82129e-05	0.00413837
SLC19A3	171.7 ± 77.8	96.6 ± 48.8	0.00049	0.0169	171.74 ± 77.84	111.27 ± 58.57	0.000204555	0.00949521
SLC20A1	290.2 ± 40.7	251.7 ± 40.5	0.00244	0.0405	290.24 ± 40.70	251.30 ± 49.82	0.00179564	0.0292861
SLC20A2	419.1 ± 55.7	359.2 ± 66.0	0.00024	0.0133	419.09 ± 55.71	352.15 ± 44.18	4.73651e-06	0.00209952
SLC22A17	683.0 ± 256.7	773.7 ± 311.9	0.00122	0.0267	683.00 ± 256.67	825.25 ± 318.36	0.000960676	0.0206823
SLC24A6	106.2 ± 23.8	94.2 ± 23.8	0.00049	0.0169	106.19 ± 23.84	91.11 ± 21.57	9.0623e-05	0.00645285
SLC25A22	208.7 ± 19.2	230.2 ± 19.2	0.00342	0.0489	208.73 ± 19.16	236.87 ± 23.33	3.95217e-05	0.00480719
SLC25A37	209.4 ± 76.9	161.0 ± 56.5	0.00049	0.0169	209.42 ± 76.88	165.51 ± 71.36	0.00259627	0.0356979
SLC27A2	154.7 ± 50.2	177.7 ± 58.3	0.00342	0.0489	154.65 ± 50.23	193.46 ± 67.89	0.00180389	0.0293131
SLC36A1	99.3 ± 14.2	85.3 ± 9.5	0.00073	0.0204	99.26 ± 14.16	84.59 ± 12.70	0.000895603	0.0199903
SLC39A10	493.4 ± 108.0	408.2 ± 86.7	0.00024	0.0133	493.41 ± 107.97	421.86 ± 100.20	0.00341867	0.0416593
SLC3A1	335.5 ± 148.8	210.2 ± 130.6	0.00049	0.0169	335.50 ± 148.85	235.43 ± 146.91	0.000579049	0.0158464
SLC3A2	1.562.3 ± 317.0	1.886.3 ± 346.2	0.00024	0.0133	1562.34 ± 316.96	1857.41 ± 350.42	0.00417109	0.0465624
SLC40A1	1.246.1 ± 325.8	947.3 ± 265.3	0.00024	0.0133	1246.12 ± 325.78	1003.93 ± 271.39	0.00087768	0.0198773
SLC44A4	1.182.9 ± 353.1	890.2 ± 281.2	0.00024	0.0133	1182.92 ± 353.10	890.28 ± 273.90	0.000403695	0.0131007
SLC45A3	112.5 ± 34.1	132.7 ± 45.6	0.00122	0.0267	112.55 ± 34.12	134.56 ± 55.02	0.00252432	0.0350352
SLC46A3	267.0 ± 69.4	200.7 ± 60.5	0.00049	0.0169	267.04 ± 69.44	217.66 ± 61.26	0.00425992	0.0471
SLC4A4	1.161.2 ± 367.9	776.3 ± 368.9	0.00024	0.0133	1161.24 ± 367.86	799.30 ± 349.13	0.000266091	0.0107425
SLC5A2	158.2 ± 16.6	176.3 ± 27.7	0.00342	0.0489	158.25 ± 16.61	181.79 ± 27.76	0.0010327	0.0215648
SLC5A4	42.9 ± 23.5	53.7 ± 28.1	0.00342	0.0489	42.92 ± 23.45	72.04 ± 38.78	0.000148767	0.00814238
SLC7A1	431.4 ± 52.4	518.5 ± 73.5	0.00171	0.0326	431.42 ± 52.43	523.97 ± 83.70	0.0046452	0.0495691
SLC7A5	403.3 ± 132.0	657.2 ± 254.0	0.00049	0.0169	403.33 ± 132.03	699.18 ± 267.24	8.99225e-06	0.00248169
SLC7A7	67.1 ± 20.4	53.4 ± 12.5	0.00073	0.0204	67.09 ± 20.41	59.04 ± 18.72	0.00358375	0.0426812
SLCO2A1	61.4 ± 14.0	44.2 ± 4.5	0.00122	0.0267	61.37 ± 14.02	44.37 ± 5.98	0.000271078	0.0108839
SLCO5A1	109.0 ± 27.7	136.7 ± 38.5	0.00122	0.0267	109.01 ± 27.73	155.63 ± 46.36	1.22196e-06	0.00162038
SLFN13	48.0 ± 11.4	36.6 ± 7.3	0.00024	0.0133	47.96 ± 11.45	36.54 ± 7.45	1.67811e-05	0.00324414
SLPI	907.4 ± 341.0	702.3 ± 361.8	0.00122	0.0267	907.44 ± 341.01	740.64 ± 395.10	0.00432504	0.0474372
SMAD3	364.4 ± 161.7	326.4 ± 190.1	0.00244	0.0405	364.35 ± 161.73	312.49 ± 168.80	0.000218395	0.0098066
SMAD7	111.7 ± 15.7	98.1 ± 7.4	0.00073	0.0204	111.67 ± 15.70	93.47 ± 13.15	0.000330645	0.0120226
SMC2	129.6 ± 23.7	104.9 ± 36.9	0.00244	0.0405	129.62 ± 23.75	106.95 ± 22.42	0.000459646	0.0141644
SNAI2	288.4 ± 102.7	186.6 ± 60.0	0.00024	0.0133	288.44 ± 102.67	189.06 ± 85.53	3.46421e-06	0.001996
SNAP25	313.2 ± 147.8	398.1 ± 170.2	0.00073	0.0204	313.18 ± 147.83	408.26 ± 183.45	0.000577663	0.0158464
SNED1	80.0 ± 10.5	90.8 ± 10.3	0.00073	0.0204	80.03 ± 10.49	90.47 ± 11.76	0.00465577	0.0496311
SNHG12	171.6 ± 75.1	267.0 ± 123.8	0.00342	0.0489	171.64 ± 75.09	264.95 ± 123.20	0.000545133	0.0154251
SNORD74	146.7 ± 56.6	223.9 ± 112.2	0.00073	0.0204	146.68 ± 56.62	220.65 ± 118.51	6.15471e-05	0.00549033
SNRPD2	341.8 ± 44.5	371.1 ± 47.2	0.00049	0.0169	341.83 ± 44.48	368.90 ± 46.61	0.00252669	0.0350352
SNTB2	177.3 ± 25.9	157.4 ± 25.8	0.00024	0.0133	177.26 ± 25.93	155.87 ± 21.84	0.0001268	0.00764362
SOAT1	733.7 ± 75.2	610.6 ± 77.4	0.00024	0.0133	733.74 ± 75.23	631.04 ± 84.51	0.00038802	0.0128758
SOCS5	335.0 ± 40.0	300.9 ± 46.7	0.00171	0.0326	334.98 ± 39.99	300.83 ± 37.49	0.00291409	0.0379393
SORD	568.3 ± 184.7	470.7 ± 152.8	0.00244	0.0405	568.26 ± 184.69	456.19 ± 162.50	0.00404925	0.0458522
SOX4	434.0 ± 142.3	400.1 ± 150.3	0.00244	0.0405	433.96 ± 142.34	380.51 ± 127.82	4.51058e-05	0.00493752
SPIN1	948.8 ± 85.4	855.3 ± 83.0	0.00024	0.0133	948.79 ± 85.39	835.11 ± 101.19	0.000778531	0.0186054
SPON2	175.7 ± 53.9	141.1 ± 35.0	0.00122	0.0267	175.66 ± 53.89	140.92 ± 43.91	5.96704e-06	0.00230333
SPRED1	238.0 ± 47.0	208.6 ± 32.5	0.00244	0.0405	237.98 ± 47.04	204.23 ± 44.73	0.00267516	0.0361549
SPTLC3	102.3 ± 25.6	82.1 ± 20.3	0.00244	0.0405	102.25 ± 25.57	86.82 ± 24.36	0.00280249	0.0371776
SRPR	1.658.0 ± 264.8	1.853.7 ± 230.6	0.00049	0.0169	1658.00 ± 264.85	1943.82 ± 292.73	0.00022733	0.0100298
SRPX	92.4 ± 38.1	74.3 ± 24.7	0.00024	0.0133	92.44 ± 38.12	75.26 ± 36.79	2.15755e-05	0.00367996
SRPX2	252.3 ± 135.4	181.5 ± 81.5	0.00049	0.0169	252.27 ± 135.41	203.37 ± 129.30	0.00056574	0.0156846
SSR2	2.935.6 ± 198.2	3.331.1 ± 217.9	0.00024	0.0133	2935.57 ± 198.21	3375.47 ± 295.27	0.000601285	0.0161931
ST6GALNAC1	56.8 ± 11.4	46.9 ± 7.4	0.00244	0.0405	56.78 ± 11.39	46.80 ± 9.79	0.00287916	0.0376627
STAT1	856.0 ± 96.6	769.4 ± 108.9	0.00049	0.0169	855.98 ± 96.56	780.19 ± 125.39	0.00336254	0.0412877
STAT4	123.7 ± 41.3	141.1 ± 52.0	0.00244	0.0405	123.72 ± 41.31	140.99 ± 45.86	0.000996957	0.0210716
STAT6	339.4 ± 75.4	308.0 ± 74.1	0.00342	0.0489	339.40 ± 75.45	295.80 ± 63.17	0.00113501	0.0227786
STBD1	95.1 ± 19.3	113.2 ± 20.2	0.00049	0.0169	95.13 ± 19.32	114.01 ± 18.99	0.00453672	0.0489163
STC2	68.1 ± 21.0	105.0 ± 30.8	0.00073	0.0204	68.12 ± 20.99	99.33 ± 24.89	4.6699e-05	0.00503193
STIL	33.3 ± 5.6	26.0 ± 5.6	0.00244	0.0405	33.34 ± 5.58	26.98 ± 3.66	5.40377e-06	0.00220178
STK17B	286.7 ± 59.3	244.7 ± 55.9	0.00073	0.0204	286.75 ± 59.29	252.38 ± 62.50	0.0021584	0.032083
STK19	118.7 ± 10.5	139.5 ± 12.8	0.00024	0.0133	142.22 ± 11.36	165.28 ± 18.64	0.00199213	0.0310643
STK38	267.5 ± 39.9	212.9 ± 34.7	0.00024	0.0133	267.49 ± 39.88	220.27 ± 37.95	0.000197135	0.00930787
STK40	228.6 ± 18.4	273.0 ± 29.2	0.00024	0.0133	228.64 ± 18.39	273.25 ± 32.38	7.43647e-05	0.00581282
STMN1	293.6 ± 31.6	251.5 ± 55.8	0.00049	0.0169	293.62 ± 31.57	256.79 ± 43.78	0.00172028	0.0287194
STOM	509.7 ± 105.4	446.4 ± 108.8	0.00171	0.0326	509.72 ± 105.42	448.45 ± 109.01	0.000679121	0.0172346
STS	120.3 ± 26.0	86.8 ± 17.7	0.00024	0.0133	120.35 ± 26.00	92.51 ± 21.00	7.92029e-05	0.00598853
SUPT3H	62.5 ± 12.3	79.0 ± 13.8	0.00342	0.0489	62.45 ± 12.33	75.93 ± 14.70	0.00175691	0.0289467
SYP	464.4 ± 206.1	565.2 ± 223.0	0.00122	0.0267	464.39 ± 206.06	604.00 ± 241.40	0.00021649	0.00980106
SYT4	1.927.6 ± 867.0	2.132.0 ± 796.7	0.00244	0.0405	1927.58 ± 866.96	2275.44 ± 807.48	0.000669472	0.0170675
TACC1	658.9 ± 97.4	562.1 ± 100.9	0.00024	0.0133	658.88 ± 97.40	567.56 ± 88.26	0.000377417	0.0128758
TAF15	1.056.8 ± 99.4	948.6 ± 93.7	0.00024	0.0133	1056.76 ± 99.39	946.65 ± 86.62	0.00142905	0.0258319
TAF1D	274.4 ± 89.4	391.1 ± 145.7	0.00073	0.0204	274.42 ± 89.43	403.82 ± 184.86	0.000117506	0.0074081
TAX1BP3	669.5 ± 163.3	552.5 ± 134.6	0.00073	0.0204	669.53 ± 163.25	531.72 ± 134.02	4.68831e-05	0.00503193
TBC1D14	412.5 ± 53.6	372.5 ± 52.6	0.00049	0.0169	412.50 ± 53.65	357.84 ± 48.98	0.000251341	0.0104342
TBL2	273.9 ± 21.6	322.0 ± 26.5	0.00024	0.0133	273.86 ± 21.57	342.35 ± 40.07	4.715e-05	0.00503601
TBXAS1	117.7 ± 33.2	95.1 ± 23.8	0.00073	0.0204	117.66 ± 33.16	95.23 ± 27.21	0.00133879	0.0249633
TCEAL2	406.1 ± 150.4	475.4 ± 170.6	0.00122	0.0267	406.13 ± 150.38	503.66 ± 156.09	0.000168678	0.00859108
TCEAL6	570.6 ± 156.3	653.3 ± 175.2	0.00122	0.0267	570.57 ± 156.31	678.27 ± 152.96	6.6886e-05	0.00560879
TCF7L2	215.1 ± 30.9	180.2 ± 28.9	0.00024	0.0133	215.09 ± 30.89	181.67 ± 28.22	0.000190566	0.00924701
TCIRG1	136.6 ± 29.0	123.7 ± 27.4	0.00024	0.0133	136.65 ± 29.03	120.44 ± 29.16	0.000593095	0.0161069
TCN1	509.6 ± 242.3	304.8 ± 199.4	0.00024	0.0133	509.60 ± 242.33	365.56 ± 239.22	0.00416117	0.0465574
TEAD2	179.1 ± 49.1	151.2 ± 46.9	0.00122	0.0267	179.13 ± 49.14	151.28 ± 50.19	0.00192662	0.0304967
TEX2	321.7 ± 44.4	283.0 ± 43.1	0.00244	0.0405	321.68 ± 44.37	284.74 ± 29.05	0.00173973	0.0288894
TFDP2	319.3 ± 39.2	272.5 ± 46.1	0.00024	0.0133	319.31 ± 39.23	283.03 ± 48.21	0.00359601	0.0427451
TGFBI	713.9 ± 422.6	497.6 ± 243.7	0.00171	0.0326	713.90 ± 422.60	526.14 ± 319.61	0.00170672	0.0286864
TGFBR2	267.5 ± 55.9	234.6 ± 59.9	0.00342	0.0489	267.53 ± 55.87	238.68 ± 53.68	0.000386231	0.0128758
THY1	170.9 ± 95.2	119.7 ± 46.8	0.00342	0.0489	170.90 ± 95.18	123.16 ± 65.42	0.00011866	0.00742491
TIMP1	7.819.4 ± 1.401.0	6.758.6 ± 1.682.3	0.00049	0.0169	7819.37 ± 1400.98	6694.52 ± 1831.39	0.000306011	0.0115094
TIMP2	1.719.4 ± 264.3	1.481.3 ± 281.7	0.00073	0.0204	1719.43 ± 264.30	1446.85 ± 257.18	5.17431e-05	0.00512299
TIMP3	422.2 ± 250.0	307.3 ± 170.9	0.00073	0.0204	422.21 ± 249.98	302.42 ± 187.97	8.04823e-06	0.00238556
TJP3	134.0 ± 18.5	114.4 ± 21.4	0.00122	0.0267	134.03 ± 18.52	112.69 ± 13.07	7.91641e-06	0.00238556
TLL1	38.1 ± 10.8	31.7 ± 6.8	0.00049	0.0169	38.08 ± 10.82	33.55 ± 8.86	0.00352877	0.0422426
TLL2	46.3 ± 6.2	55.1 ± 8.1	0.00171	0.0326	46.34 ± 6.22	59.40 ± 14.44	0.00342162	0.0416593
TLR3	237.3 ± 87.9	160.7 ± 70.7	0.00024	0.0133	237.34 ± 87.92	173.17 ± 73.56	8.38948e-05	0.00619428
TM4SF20	120.0 ± 118.5	39.8 ± 35.8	0.00024	0.0133	119.99 ± 118.52	35.87 ± 21.44	4.43631e-06	0.00209952
TM4SF4	4.704.1 ± 1.740.2	3.956.5 ± 1.856.2	0.00024	0.0133	4704.14 ± 1740.20	4067.15 ± 1735.90	0.00396995	0.0451826
TMC5	512.3 ± 193.4	388.7 ± 182.5	0.00024	0.0133	512.25 ± 193.44	391.32 ± 184.94	0.000107555	0.00712794
TMEM127	494.9 ± 61.6	462.1 ± 54.1	0.00244	0.0405	494.93 ± 61.59	457.75 ± 52.02	0.000436383	0.0137361
TMEM139	150.0 ± 50.8	121.9 ± 40.1	0.00024	0.0133	149.96 ± 50.75	125.19 ± 41.09	0.00141467	0.0257668
TMEM140	215.7 ± 73.3	191.3 ± 74.5	0.00342	0.0489	215.71 ± 73.31	181.54 ± 53.35	0.00217368	0.0322063
TMEM14A	490.3 ± 57.1	420.3 ± 45.8	0.00073	0.0204	490.25 ± 57.08	420.24 ± 60.20	0.000617458	0.0163289
TMEM154	47.7 ± 12.5	94.5 ± 49.0	0.00073	0.0204	47.72 ± 12.54	88.59 ± 35.62	1.7033e-05	0.00324896
TMEM19	307.0 ± 46.0	250.4 ± 52.4	0.00024	0.0133	307.00 ± 46.05	254.29 ± 45.75	0.00142934	0.0258319
TMEM200A	113.3 ± 61.9	148.8 ± 59.3	0.00122	0.0267	113.35 ± 61.94	176.01 ± 78.62	6.73862e-06	0.0023185
TMEM203	248.1 ± 18.3	222.1 ± 22.5	0.00171	0.0326	254.29 ± 19.17	233.43 ± 23.56	0.00354442	0.042318
TMEM208	389.4 ± 42.7	469.6 ± 55.3	0.00049	0.0169	389.40 ± 42.69	483.69 ± 72.84	0.00109089	0.0222039
TMEM214	486.0 ± 51.8	521.2 ± 52.0	0.00171	0.0326	486.04 ± 51.75	561.18 ± 81.14	0.00389587	0.0448185
TMEM22	138.4 ± 33.9	163.3 ± 33.4	0.00049	0.0169	138.36 ± 33.93	169.55 ± 35.15	0.000704922	0.0176432
TMEM37	313.5 ± 73.6	238.1 ± 74.4	0.00049	0.0169	313.46 ± 73.60	229.74 ± 75.07	0.000203624	0.00949521
TMEM39A	389.3 ± 64.2	467.1 ± 83.1	0.00073	0.0204	389.29 ± 64.18	496.01 ± 88.36	0.000202867	0.00949521
TMEM48	269.9 ± 36.2	229.4 ± 24.1	0.00244	0.0405	269.91 ± 36.19	235.54 ± 30.22	0.00440111	0.0479621
TMEM50A	1.417.3 ± 186.1	1.221.7 ± 167.8	0.00024	0.0133	1417.30 ± 186.13	1230.51 ± 171.27	1.00837e-05	0.00258202
TMEM54	434.0 ± 93.5	364.5 ± 82.6	0.00024	0.0133	434.01 ± 93.46	355.01 ± 71.43	0.000225639	0.00998917
TMEM63A	359.5 ± 146.4	275.8 ± 120.2	0.00024	0.0133	359.49 ± 146.44	279.72 ± 116.34	0.000894334	0.0199903
TMPO	301.6 ± 48.3	247.7 ± 30.2	0.00049	0.0169	301.61 ± 48.30	256.23 ± 44.06	0.00457058	0.0490667
TMPRSS2	357.1 ± 180.9	282.1 ± 156.9	0.00024	0.0133	357.12 ± 180.87	282.99 ± 139.58	0.0018214	0.0295106
TMPRSS4	103.3 ± 73.0	56.0 ± 23.3	0.00342	0.0489	103.34 ± 72.99	63.73 ± 32.68	0.00286836	0.0375621
TMPRSS6	52.4 ± 5.6	59.0 ± 9.0	0.00073	0.0204	52.40 ± 5.64	59.25 ± 7.06	7.58101e-05	0.00589403
TMUB1	172.8 ± 18.4	200.8 ± 22.3	0.00024	0.0133	172.78 ± 18.35	191.83 ± 17.44	0.00258522	0.0355731
TNFRSF1A	415.0 ± 41.2	378.7 ± 35.5	0.00049	0.0169	415.03 ± 41.18	373.59 ± 37.53	0.00168816	0.0285502
TNFSF10	1.232.5 ± 447.6	913.4 ± 363.8	0.00024	0.0133	1232.47 ± 447.63	950.98 ± 384.31	0.00124126	0.0237693
TOP2A	77.0 ± 35.9	43.4 ± 16.2	0.00024	0.0133	76.98 ± 35.89	47.37 ± 31.30	4.49323e-05	0.00493752
TP53I3	277.0 ± 71.5	244.8 ± 60.5	0.00122	0.0267	277.03 ± 71.51	249.95 ± 67.90	0.00110761	0.0223785
TP53INP1	426.4 ± 122.2	371.3 ± 94.1	0.00244	0.0405	426.36 ± 122.20	378.32 ± 101.16	0.00440946	0.0480293
TPM2	182.2 ± 53.0	145.4 ± 35.3	0.00171	0.0326	182.24 ± 53.02	145.85 ± 48.03	0.000156583	0.00832177
TPPP3	143.0 ± 44.0	179.4 ± 73.1	0.00049	0.0169	142.95 ± 43.99	195.07 ± 104.64	0.000295872	0.0113723
TPX2	50.4 ± 17.0	31.5 ± 8.5	0.00024	0.0133	50.40 ± 17.01	35.68 ± 16.23	0.000411916	0.0132388
TRAM2	124.4 ± 25.5	105.7 ± 18.9	0.00171	0.0326	124.44 ± 25.52	110.56 ± 15.02	0.00273922	0.036638
TRERF1	72.3 ± 10.1	66.4 ± 9.6	0.00244	0.0405	85.70 ± 23.76	71.12 ± 20.86	0.00216098	0.032083
TRIB3	121.3 ± 21.6	201.5 ± 58.3	0.00024	0.0133	121.32 ± 21.55	200.34 ± 48.94	6.5439e-05	0.00555916
TRIM13	199.1 ± 25.9	166.2 ± 20.4	0.00122	0.0267	199.08 ± 25.94	169.90 ± 24.16	0.00382144	0.0443758
TRIM22	161.8 ± 53.4	111.8 ± 34.1	0.00049	0.0169	161.78 ± 53.39	122.02 ± 42.70	0.000138004	0.00784295
TRIM32	215.7 ± 18.1	192.3 ± 29.0	0.00244	0.0405	215.75 ± 18.11	198.50 ± 30.00	0.00361813	0.042846
TRIP13	49.2 ± 14.5	37.9 ± 6.4	0.00122	0.0267	49.21 ± 14.50	40.99 ± 10.89	0.00246638	0.0345867
TRPV6	221.2 ± 108.3	181.0 ± 91.9	0.00024	0.0133	221.18 ± 108.33	170.74 ± 80.72	0.000230191	0.0100654
TSPAN15	693.9 ± 213.5	578.9 ± 223.6	0.00024	0.0133	693.89 ± 213.47	580.74 ± 205.50	0.000140037	0.00788022
TSPAN6	458.9 ± 126.9	349.3 ± 134.1	0.00024	0.0133	458.89 ± 126.86	373.29 ± 140.08	0.000412764	0.0132388
TSPAN8	1.740.4 ± 604.9	870.6 ± 550.3	0.00024	0.0133	1740.37 ± 604.89	989.20 ± 548.59	0.000345905	0.0123122
TSPYL2	187.6 ± 55.3	254.8 ± 62.1	0.00049	0.0169	187.58 ± 55.27	260.39 ± 69.75	0.000139791	0.00788022
TTK	15.7 ± 4.9	10.8 ± 2.8	0.00342	0.0489	15.70 ± 4.94	12.19 ± 7.02	0.0020145	0.0311703
TUBA4A	819.9 ± 129.0	936.0 ± 150.8	0.00342	0.0489	819.93 ± 129.04	908.57 ± 121.84	0.00260389	0.0357406
TUBA8	56.0 ± 7.2	63.4 ± 8.4	0.00244	0.0405	55.98 ± 7.23	65.85 ± 8.06	0.0027181	0.0364443
TYMS	83.0 ± 27.8	55.0 ± 15.9	0.00049	0.0169	83.01 ± 27.80	56.07 ± 15.16	0.000337729	0.0121818
UACA	122.9 ± 27.6	94.2 ± 21.1	0.00073	0.0204	122.85 ± 27.61	94.31 ± 19.40	0.00192081	0.0304267
UBA7	120.1 ± 25.1	102.1 ± 22.7	0.00122	0.0267	120.14 ± 25.08	100.97 ± 19.64	6.65e-05	0.005606
UBC	9.053.0 ± 404.5	9.603.6 ± 505.3	0.00342	0.0489	9053.00 ± 404.55	9679.26 ± 423.49	0.000301015	0.0114388
UBD	345.5 ± 178.3	246.1 ± 137.0	0.00024	0.0133	345.51 ± 178.27	258.87 ± 142.43	0.00334973	0.0412807
UBE2C	79.5 ± 12.1	63.3 ± 10.7	0.00342	0.0489	79.54 ± 12.12	64.52 ± 11.37	4.83039e-07	0.0015183
UCA1	449.3 ± 178.7	183.4 ± 99.6	0.00024	0.0133	449.25 ± 178.74	228.63 ± 153.52	1.82782e-05	0.0034021
UFM1	1.058.4 ± 117.1	1.229.9 ± 142.0	0.00171	0.0326	1058.43 ± 117.06	1295.82 ± 142.98	0.000115087	0.00736108
UGT1A1	115.7 ± 50.4	84.4 ± 42.3	0.00122	0.0267	115.72 ± 50.36	90.85 ± 45.40	0.000485521	0.0146689
UGT2A3	312.0 ± 123.5	190.0 ± 110.8	0.00024	0.0133	312.03 ± 123.48	211.34 ± 108.74	0.000320996	0.0118901
UGT2B15	2.339.8 ± 1.324.2	1.394.2 ± 1.331.7	0.00073	0.0204	2339.77 ± 1324.17	1458.77 ± 1328.98	0.000941618	0.0205106
UGT2B7	2.820.4 ± 1.716.6	1.682.2 ± 1.628.9	0.00073	0.0204	2820.44 ± 1716.60	1696.77 ± 1528.00	0.000593258	0.0161069
UNC13A	220.7 ± 100.8	273.6 ± 124.8	0.00342	0.0489	220.73 ± 100.83	284.96 ± 113.41	0.000937018	0.020494
USMG5	496.0 ± 59.5	534.6 ± 44.5	0.00122	0.0267	1382.87 ± 125.12	1562.15 ± 143.16	5.2823e-05	0.00517573
UXT	421.2 ± 36.9	484.0 ± 32.8	0.00122	0.0267	421.22 ± 36.86	492.81 ± 41.29	3.40425e-05	0.00459521
VANGL1	87.9 ± 21.3	77.1 ± 20.2	0.00049	0.0169	87.90 ± 21.35	78.72 ± 19.03	0.00364949	0.0430478
VCAN	249.1 ± 185.6	128.9 ± 70.7	0.00049	0.0169	249.12 ± 185.64	183.06 ± 214.04	0.00074387	0.0182034
VGF	591.0 ± 212.6	941.7 ± 346.4	0.00024	0.0133	591.04 ± 212.63	841.17 ± 257.44	6.29409e-05	0.00549033
VIM	574.9 ± 184.4	803.0 ± 318.2	0.00171	0.0326	574.94 ± 184.45	717.35 ± 159.29	0.00079201	0.0187177
VNN2	228.3 ± 120.3	138.8 ± 80.8	0.00024	0.0133	228.29 ± 120.28	138.71 ± 74.91	0.00265213	0.0360107
VPS37C	149.5 ± 7.3	171.4 ± 18.2	0.00049	0.0169	149.46 ± 7.34	167.22 ± 11.29	0.000342337	0.0123076
VPS41	1.600.3 ± 234.3	1.469.6 ± 270.6	0.00122	0.0267	1600.32 ± 234.31	1409.50 ± 201.12	0.000414203	0.0132464
VRK1	240.7 ± 26.3	208.7 ± 40.9	0.00342	0.0489	240.66 ± 26.31	208.13 ± 35.77	0.00157799	0.0273599
VSTM2L	124.8 ± 13.9	145.6 ± 18.8	0.00049	0.0169	124.85 ± 13.86	140.76 ± 20.32	0.0013921	0.0254895
VTCN1	552.9 ± 233.4	446.6 ± 259.7	0.00244	0.0405	552.88 ± 233.41	428.58 ± 241.88	0.00119388	0.0234539
WARS	536.7 ± 124.3	652.1 ± 166.3	0.00244	0.0405	536.69 ± 124.32	678.05 ± 165.80	0.00079934	0.0188101
WDR46	213.3 ± 26.7	237.6 ± 26.1	0.00171	0.0326	213.28 ± 26.65	238.89 ± 23.61	0.00457384	0.0490667
WDR72	99.6 ± 43.1	56.4 ± 30.0	0.00024	0.0133	99.57 ± 43.11	63.83 ± 44.12	0.000795506	0.0187802
WIPI1	509.5 ± 103.9	582.8 ± 101.4	0.00024	0.0133	509.49 ± 103.86	594.91 ± 78.37	0.00252702	0.0350352
WNT5A	267.4 ± 139.0	168.2 ± 76.7	0.00024	0.0133	267.44 ± 139.04	186.61 ± 105.50	0.000263328	0.0106639
WWP2	133.8 ± 19.7	118.7 ± 13.7	0.00073	0.0204	133.83 ± 19.68	120.92 ± 19.94	0.000925629	0.0203865
WWTR1	320.1 ± 103.6	256.5 ± 99.8	0.00024	0.0133	320.13 ± 103.63	265.77 ± 99.50	0.000728732	0.0179338
YARS	493.5 ± 72.6	591.5 ± 98.0	0.00122	0.0267	493.45 ± 72.62	579.44 ± 100.35	0.00103499	0.0215648
YIF1A	410.3 ± 65.0	456.4 ± 78.7	0.00024	0.0133	410.26 ± 65.01	478.23 ± 105.04	0.00197695	0.0309338
YIPF2	262.3 ± 54.6	309.0 ± 66.7	0.00049	0.0169	262.32 ± 54.56	321.98 ± 79.76	0.000786863	0.0187045
YPEL1	57.7 ± 13.9	48.9 ± 11.5	0.00171	0.0326	57.69 ± 13.89	47.56 ± 8.90	0.000166119	0.00854547
YRDC	416.2 ± 29.3	486.2 ± 53.0	0.00122	0.0267	416.20 ± 29.25	493.53 ± 53.71	0.00131362	0.0246401
ZBTB38	1.315.7 ± 219.0	1.174.0 ± 232.6	0.00122	0.0267	1315.73 ± 218.99	1143.59 ± 190.26	0.000152898	0.00824904
ZC3H12C	209.7 ± 38.4	242.8 ± 44.4	0.00024	0.0133	209.75 ± 38.36	253.02 ± 49.61	0.00444504	0.0483062
ZDHHC3	244.0 ± 27.6	208.5 ± 24.8	0.00049	0.0169	243.98 ± 27.60	218.34 ± 32.10	0.00036664	0.01266
ZFAND1	765.7 ± 76.7	861.5 ± 106.3	0.00244	0.0405	765.68 ± 76.66	877.25 ± 66.81	0.000161555	0.00844989
ZFAND2A	174.8 ± 30.4	208.7 ± 27.0	0.00049	0.0169	174.80 ± 30.39	222.07 ± 45.44	0.00122531	0.0235907
ZFP106	401.6 ± 43.6	349.7 ± 45.9	0.00122	0.0267	401.64 ± 43.56	357.19 ± 24.95	0.00219186	0.0322585
ZNF165	107.7 ± 22.1	180.5 ± 46.4	0.00024	0.0133	107.70 ± 22.14	189.83 ± 66.11	4.39521e-06	0.00209952
ZNF217	379.6 ± 114.7	330.6 ± 113.6	0.00024	0.0133	379.59 ± 114.68	341.58 ± 120.07	0.00211498	0.031786
ZNF331	194.5 ± 41.4	257.4 ± 93.7	0.00342	0.0489	194.54 ± 41.37	260.04 ± 85.97	0.000146779	0.00807377
ZNF395	278.1 ± 80.6	387.2 ± 146.9	0.00073	0.0204	278.09 ± 80.62	351.19 ± 127.85	0.00217261	0.0322063
ZNF436	157.2 ± 23.1	131.9 ± 17.8	0.00024	0.0133	157.22 ± 23.11	137.46 ± 18.70	0.0022178	0.0325478
ZNF704	112.7 ± 40.0	89.0 ± 35.7	0.00024	0.0133	112.68 ± 39.97	92.95 ± 30.07	3.8263e-05	0.00480719
ZNF827	133.4 ± 18.4	114.5 ± 17.5	0.00049	0.0169	133.43 ± 18.45	118.96 ± 18.59	0.00207281	0.0315419
ZNF90	750.0 ± 140.3	843.4 ± 148.3	0.00024	0.0133	750.02 ± 140.35	834.66 ± 139.72	7.76391e-05	0.00593144
ZSCAN2	71.7 ± 5.3	67.4 ± 6.0	0.00342	0.0489	71.70 ± 5.30	64.66 ± 5.38	0.0025073	0.0348968
ZSWIM6	356.5 ± 67.2	318.9 ± 83.5	0.00122	0.0267	356.46 ± 67.15	316.14 ± 67.81	5.88135e-05	0.00542661
