# Supplementary material for: Glucolipotoxicity Alters Insulin Secretion via Epigenetic Changes in Human Islets
Source: Oxford University Press journal article supplement (doi:10.2337/db18-0900), 2019-08-16
Supplement: db180900supplementarydata6.xlsx [file db180900supplementarydata6.xlsx]

## Sheet: lg_vs_hgp_top
Supplementary Table 5. Differentially methylated CpG sites in pancreatic islets after exposure to high glucose and palmitate (p<0.05)
*Some CpG sites are annotated to several transcripts from the same gene, or to several genes
TargetID	Gene symbol*	% Methylation Control (mean ± SD)	% Methylation High glcuose and palmitate (mean ± SD)	p-value
cg20634266	Intergenic	24.95 ± 1.93	28.51 ± 1.67	1.75339e-07
cg04114276	Intergenic	94.81 ± 0.89	96.21 ± 0.56	5.73943e-07
cg04241863	NAT1;NAT1;NAT1;NAT1;NAT1;NAT1;NAT1;NAT1	25.56 ± 3.83	29.11 ± 3.94	9.03902e-07
cg18741277	ZGLP1	64.51 ± 2.69	67.80 ± 2.42	9.66037e-07
cg23623214	Intergenic	80.70 ± 6.23	86.28 ± 4.23	1.19086e-06
cg15154411	GABBR1;GABBR1;GABBR1	65.91 ± 5.07	70.31 ± 4.51	1.4451e-06
cg14431573	BCL2L10	30.52 ± 5.98	34.26 ± 6.12	1.61749e-06
cg06778844	PAK3;PAK3	80.61 ± 15.4	84.14 ± 14.2	1.63849e-06
cg22408278	NCRNA00171;ZNRD1;ZNRD1;ZNRD1;ZNRD1	4.22 ± 0.53	3.47 ± 0.41	1.83723e-06
cg11537828	CNPY1	78.01 ± 3.35	81.73 ± 3.67	1.91889e-06
cg02938926	GPRC5B	24.18 ± 3.58	26.69 ± 3.87	1.93313e-06
cg17670512	RAB40B	81.36 ± 5.25	84.84 ± 4.59	2.05181e-06
cg16904509	LRRK1	95.25 ± 1.04	96.39 ± 0.79	2.12198e-06
cg25305397	Intergenic	69.46 ± 2.93	73.32 ± 1.85	2.24394e-06
cg23499115	PEX5L	56.89 ± 5.82	62.67 ± 6.02	2.31401e-06
cg00564555	Intergenic	59.26 ± 2.24	62.26 ± 1.82	2.62353e-06
cg07305369	Intergenic	68.33 ± 4.10	71.43 ± 3.99	2.87545e-06
cg06857094	VARS	32.11 ± 2.05	35.02 ± 2.46	3.41602e-06
cg14511745	CUGBP1	2.17 ± 0.30	3.05 ± 0.33	3.53539e-06
cg01187288	Intergenic	94.20 ± 1.02	95.76 ± 0.40	3.91145e-06
cg05849324	NHLRC1	30.20 ± 3.24	32.54 ± 2.94	3.98558e-06
cg03152912	Intergenic	44.90 ± 3.90	48.72 ± 4.28	4.0207e-06
cg01506341	TRIM40;TRIM40	68.56 ± 2.57	71.85 ± 2.07	4.09348e-06
cg19377703	Intergenic	77.64 ± 2.21	80.28 ± 1.45	4.13058e-06
cg19679907	Intergenic	67.51 ± 6.35	72.52 ± 5.76	4.20021e-06
cg22629987	QPCT	11.71 ± 3.76	15.17 ± 4.85	4.44478e-06
cg04342594	Intergenic	35.46 ± 10.4	40.09 ± 10.8	4.56909e-06
cg23043139	FBLN2;FBLN2;FBLN2	64.26 ± 2.74	68.27 ± 2.53	4.60588e-06
cg03581660	POL3S	75.96 ± 3.33	79.36 ± 3.24	4.71273e-06
cg14601416	COL8A2	57.70 ± 3.76	62.33 ± 3.56	5.16102e-06
cg25193571	HCG4	65.10 ± 8.15	68.85 ± 7.31	5.68895e-06
cg04020309	ZNF496	23.52 ± 3.96	26.31 ± 4.34	6.26042e-06
cg14099160	SEC63	83.60 ± 1.41	86.36 ± 1.68	6.36076e-06
cg11052922	APOA4	86.04 ± 3.59	89.12 ± 3.42	6.99591e-06
cg05082550	Intergenic	75.08 ± 2.30	79.81 ± 2.17	8.06861e-06
cg13340269	TMEM35	10.24 ± 6.10	12.70 ± 6.94	8.5667e-06
cg00898190	Intergenic	59.41 ± 3.79	64.62 ± 2.82	8.7557e-06
cg00494556	PLSCR4;PLSCR4;PLSCR4	87.45 ± 2.47	89.54 ± 1.58	8.86553e-06
cg26650440	HCCA2;KRTAP5-5	58.12 ± 3.38	61.40 ± 3.58	8.87344e-06
cg09346546	Intergenic	19.58 ± 2.58	23.31 ± 2.70	8.92345e-06
cg25579854	MYL10;MYL10	71.92 ± 3.51	77.04 ± 3.02	9.28827e-06
cg06500476	C4orf19;C4orf19	92.39 ± 2.24	94.29 ± 1.72	9.59304e-06
cg07906688	LYPLAL1	16.63 ± 1.49	19.62 ± 1.97	1.08061e-05
cg11423443	C1orf85	49.02 ± 2.80	52.33 ± 2.25	1.11025e-05
cg20989480	WT1;WT1;WT1;WT1	58.20 ± 2.94	60.99 ± 3.04	1.14164e-05
cg04984709	PDE8B;PDE8B;PDE8B;PDE8B;PDE8B	52.45 ± 3.53	56.49 ± 3.58	1.18679e-05
cg24868883	Intergenic	97.16 ± 0.31	97.72 ± 0.22	1.2619e-05
cg14663533	LPA	36.15 ± 3.96	40.37 ± 4.56	1.27014e-05
cg12453905	TRIM2;TRIM2	22.55 ± 14.8	27.02 ± 16.2	1.27493e-05
cg05369347	Intergenic	91.72 ± 1.48	93.34 ± 1.45	1.28175e-05
cg11563074	CLIP2;CLIP2	94.21 ± 0.85	95.84 ± 0.70	1.33729e-05
cg07243617	LIMK1	92.31 ± 1.24	94.25 ± 1.06	1.35813e-05
cg09866366	ABCF3	31.01 ± 5.15	35.86 ± 5.54	1.39154e-05
cg22510098	CTBP1;CTBP1	59.43 ± 10.7	64.46 ± 10.3	1.39364e-05
cg11622330	REXO1	58.77 ± 3.14	62.21 ± 3.65	1.42419e-05
cg24952158	FHOD3	56.51 ± 5.03	61.42 ± 4.79	1.43834e-05
cg18931014	LRRC27;LRRC27;LRRC27;LRRC27;LRRC27	93.11 ± 0.97	94.20 ± 0.90	1.48104e-05
cg21273905	FHOD3	94.36 ± 1.15	95.12 ± 0.88	1.49801e-05
cg15213689	PACSIN3	95.80 ± 1.07	96.75 ± 0.56	1.5124e-05
cg23925201	Intergenic	73.94 ± 2.50	77.10 ± 1.51	1.60141e-05
cg18126630	Intergenic	47.56 ± 3.07	51.65 ± 2.13	1.60183e-05
cg16636110	ZNF264	40.72 ± 4.95	43.76 ± 3.90	1.66432e-05
cg03585280	UGDH	94.31 ± 0.94	95.33 ± 0.87	1.6884e-05
cg06383207	Intergenic	70.41 ± 3.64	75.70 ± 2.78	1.70437e-05
cg01837375	SYCE2	67.15 ± 4.38	71.05 ± 3.94	1.73568e-05
cg09375377	ATP11A;ATP11A	96.30 ± 0.91	97.28 ± 0.63	1.78902e-05
cg16958668	OR14J1	72.39 ± 4.32	75.14 ± 4.45	1.80338e-05
cg23332813	COL11A2;COL11A2;COL11A2	62.20 ± 3.87	65.84 ± 3.83	1.84685e-05
cg03448016	Intergenic	81.04 ± 2.78	83.56 ± 2.95	1.85902e-05
cg14713153	DIP2C	63.71 ± 5.91	67.40 ± 6.14	1.89437e-05
cg19959677	Intergenic	26.14 ± 3.98	29.59 ± 4.52	1.946e-05
cg20341251	WNT5B;WNT5B	55.79 ± 3.62	59.24 ± 4.01	1.99253e-05
cg15089228	Intergenic	70.76 ± 6.48	74.71 ± 5.46	2.06824e-05
cg07629094	ZNF432	7.86 ± 5.24	10.38 ± 7.76	2.06876e-05
cg05490659	HOXA10;HOXA10	13.33 ± 1.46	15.05 ± 1.70	2.07468e-05
cg10575940	SEPT9;SEPT9;SEPT9	70.85 ± 2.58	73.95 ± 1.68	2.07861e-05
cg23368579	Intergenic	51.96 ± 4.31	55.42 ± 5.18	2.08131e-05
cg13353015	CSMD2	84.16 ± 1.47	86.35 ± 1.40	2.11355e-05
cg24000937	ODF3L2	63.25 ± 4.18	66.81 ± 4.45	2.13812e-05
cg17053638	Intergenic	60.63 ± 6.55	64.32 ± 7.28	2.23201e-05
cg10567419	BRF2;BRF2	2.79 ± 0.37	2.11 ± 0.41	2.23843e-05
cg09870978	Intergenic	4.34 ± 0.54	3.50 ± 0.39	2.26893e-05
cg17691263	Intergenic	79.80 ± 4.73	84.94 ± 3.62	2.33518e-05
cg12906702	SIK3	91.92 ± 1.10	93.64 ± 1.02	2.43277e-05
cg03250393	AXL;AXL	66.73 ± 2.37	69.90 ± 1.74	2.44041e-05
cg20929922	C5orf28	13.39 ± 2.50	16.42 ± 2.94	2.46654e-05
cg05631399	SPTBN2	87.08 ± 3.13	89.72 ± 3.02	2.4865e-05
cg10857167	Intergenic	20.52 ± 3.51	23.58 ± 4.01	2.50894e-05
cg16367518	HLA-E	88.90 ± 4.28	93.56 ± 2.29	2.56172e-05
cg15742245	CD177	67.72 ± 4.39	73.19 ± 4.51	2.5883e-05
cg08260299	FLAD1;FLAD1	70.38 ± 4.20	74.85 ± 4.83	2.70545e-05
cg12244991	Intergenic	6.37 ± 1.03	5.46 ± 0.75	2.73119e-05
cg14938629	NUP205	56.14 ± 4.55	60.02 ± 3.63	2.73223e-05
cg24355006	CSNK1G2	83.30 ± 2.06	86.14 ± 1.42	2.74331e-05
cg03255440	Intergenic	88.82 ± 2.63	91.41 ± 1.85	2.7583e-05
cg26346796	TNXB	53.48 ± 3.35	56.98 ± 2.82	2.7627e-05
cg02630628	PRR12	62.89 ± 3.82	67.12 ± 3.36	2.7842e-05
cg07236884	MIR614	57.87 ± 4.18	61.32 ± 4.42	2.79647e-05
cg11874762	Intergenic	13.34 ± 2.19	15.51 ± 2.72	2.80209e-05
cg13766560	LAMC3	71.64 ± 3.05	75.77 ± 2.06	3.01282e-05
cg10696351	FOXO1	48.87 ± 3.14	52.37 ± 3.29	3.0251e-05
cg15847600	CYP11B2	68.74 ± 2.79	72.54 ± 2.69	3.04045e-05
cg02144050	TBC1D25	70.26 ± 6.27	74.44 ± 5.36	3.0798e-05
cg08355702	Intergenic	41.25 ± 8.12	46.47 ± 8.67	3.11199e-05
cg06294995	SHROOM2	91.45 ± 2.78	94.44 ± 2.68	3.13325e-05
cg21305774	Intergenic	91.19 ± 1.47	93.04 ± 1.13	3.18627e-05
cg04971812	AKT1;AKT1;AKT1	61.54 ± 8.16	66.45 ± 8.36	3.2233e-05
cg24983959	RTN4RL2	4.07 ± 1.09	3.32 ± 0.71	3.24371e-05
cg04846036	Intergenic	13.02 ± 1.83	14.98 ± 2.42	3.28283e-05
cg26995942	CACNA1H;CACNA1H	69.66 ± 6.73	75.49 ± 5.78	3.28568e-05
cg04421392	C6orf138	82.74 ± 3.66	89.54 ± 2.16	3.3207e-05
cg06905516	TNFRSF10D	75.12 ± 3.11	78.71 ± 2.80	3.3635e-05
cg19321725	Intergenic	83.84 ± 1.23	85.97 ± 1.30	3.39288e-05
cg19348206	MIR202	43.33 ± 2.47	45.83 ± 2.96	3.40952e-05
cg27146477	ANO10	96.99 ± 0.75	97.78 ± 0.63	3.41543e-05
cg02109086	MRGPRX2	71.14 ± 1.96	73.90 ± 1.19	3.45511e-05
cg05352838	CUTA;CUTA;CUTA;CUTA;CUTA	68.28 ± 5.54	71.97 ± 5.25	3.50272e-05
cg17036624	OXTR	66.73 ± 4.73	70.23 ± 3.65	3.5315e-05
cg25257748	Intergenic	60.89 ± 2.84	64.16 ± 2.64	3.54991e-05
cg17034959	MMP17	53.94 ± 2.93	56.67 ± 2.75	3.5807e-05
cg03027354	LRRN2;LRRN2	3.50 ± 0.58	2.52 ± 0.39	3.61509e-05
cg04540882	Intergenic	71.13 ± 5.68	76.73 ± 5.20	3.63415e-05
cg01002622	CTPS	53.72 ± 4.29	57.45 ± 4.98	3.67843e-05
cg01854076	NAT8L	35.52 ± 5.89	38.96 ± 5.76	3.69926e-05
cg14513781	RPL31;RPL31;RPL31	6.96 ± 0.52	8.40 ± 0.90	3.76043e-05
cg07941529	ABR;ABR;ABR	90.52 ± 1.93	92.44 ± 1.57	3.79911e-05
cg10865436	Intergenic	93.22 ± 1.47	94.41 ± 1.53	3.82603e-05
cg25336267	PRDM9	33.13 ± 3.19	36.17 ± 3.82	3.98505e-05
cg01304894	MTSS1L	61.52 ± 8.40	66.49 ± 8.41	3.98671e-05
cg06599390	PRSSL1	53.51 ± 3.00	57.37 ± 3.08	4.03652e-05
cg11510938	Intergenic	65.47 ± 4.48	69.00 ± 4.24	4.04812e-05
cg08541518	BAI3	14.05 ± 1.55	16.99 ± 1.48	4.12698e-05
cg21175246	Intergenic	15.15 ± 3.56	18.25 ± 3.88	4.21618e-05
cg19912559	PPIE;PPIE;PPIE	8.16 ± 1.81	9.87 ± 2.58	4.25972e-05
cg08289177	CXCL17;LIPE	71.19 ± 3.42	74.58 ± 3.65	4.28854e-05
cg06236976	GRINA;GRINA	93.65 ± 1.40	95.32 ± 1.11	4.30765e-05
cg09905416	MS4A2;MS4A2	73.93 ± 6.00	76.99 ± 5.40	4.34412e-05
cg06354392	Intergenic	8.03 ± 1.30	9.83 ± 1.12	4.42025e-05
cg03953980	DECR2	81.46 ± 5.13	85.68 ± 3.09	4.43333e-05
cg24849049	Intergenic	69.49 ± 7.51	74.08 ± 6.32	4.44432e-05
cg17755554	Intergenic	37.15 ± 14.4	46.16 ± 16.6	4.48707e-05
cg01858517	KCNMA1;KCNMA1;KCNMA1;KCNMA1	22.16 ± 11.4	26.08 ± 12.5	4.6514e-05
cg06486622	LOC285830;LOC285830	51.26 ± 5.92	54.57 ± 5.78	4.67201e-05
cg07027119	CD160	66.33 ± 3.52	70.43 ± 2.45	4.67969e-05
cg22732211	IER2	4.88 ± 0.50	4.13 ± 0.30	4.68445e-05
cg20607287	VWDE	18.67 ± 4.78	22.07 ± 4.35	4.7101e-05
cg01845419	Intergenic	94.14 ± 0.61	95.36 ± 0.74	4.81475e-05
cg12533206	ADARB2	79.05 ± 2.07	81.66 ± 2.09	4.83678e-05
cg03598726	ZBED4	2.40 ± 0.36	2.02 ± 0.26	4.84823e-05
cg07144297	CDH15	62.68 ± 2.65	65.78 ± 2.97	4.90613e-05
cg05769902	Intergenic	15.92 ± 2.69	18.16 ± 2.65	4.93936e-05
cg01764161	IQCA1	74.40 ± 3.76	77.49 ± 3.77	4.95372e-05
cg06760518	Intergenic	15.71 ± 3.90	18.96 ± 3.88	5.03336e-05
cg27589654	Intergenic	55.06 ± 3.21	57.20 ± 3.55	5.04876e-05
cg11949533	ZNF587	88.03 ± 1.55	90.43 ± 1.32	5.05565e-05
cg11754206	KCNB2	10.79 ± 2.31	12.78 ± 2.81	5.06335e-05
cg17823807	ABLIM2;ABLIM2;ABLIM2;ABLIM2;ABLIM2;ABLIM2;ABLIM2	80.67 ± 1.86	83.93 ± 1.35	5.08231e-05
cg00571634	WDR5B;WDR5B	2.22 ± 0.29	2.95 ± 0.42	5.13814e-05
cg09176199	SMYD3;SMYD3	58.93 ± 7.95	64.12 ± 7.59	5.13941e-05
cg15189233	FFAR2	66.62 ± 2.41	70.27 ± 2.23	5.19152e-05
cg23010035	OR2Y1	61.25 ± 2.88	64.95 ± 2.53	5.2021e-05
cg10317162	KIAA0146	84.58 ± 3.91	87.48 ± 3.28	5.25602e-05
cg15969756	RAI14;RAI14;RAI14;RAI14;RAI14;RAI14	95.62 ± 0.83	96.16 ± 0.68	5.32363e-05
cg23031869	Intergenic	3.10 ± 0.30	2.61 ± 0.30	5.41469e-05
cg06424894	SORD	40.44 ± 5.33	43.17 ± 5.35	5.64043e-05
cg23376467	ZNF474	54.81 ± 2.24	58.17 ± 2.33	5.73811e-05
cg03563298	Intergenic	91.56 ± 1.87	93.71 ± 1.53	5.77222e-05
cg03791799	MDC1	79.12 ± 1.70	82.02 ± 1.23	5.80941e-05
cg20749955	PPP1R3B	37.08 ± 4.75	41.44 ± 5.92	5.84908e-05
cg21595240	Intergenic	49.80 ± 3.60	55.78 ± 2.21	5.90102e-05
cg01092036	MMP8	94.96 ± 0.61	95.96 ± 0.60	5.98543e-05
cg02186756	PPY	69.22 ± 4.15	71.88 ± 3.69	5.99015e-05
cg20685736	TMEM61	69.79 ± 7.22	73.76 ± 6.26	5.99626e-05
cg06764804	FNDC1	61.30 ± 4.74	64.62 ± 4.98	6.03379e-05
cg09474442	TMEM37	23.77 ± 14.0	27.44 ± 14.7	6.04593e-05
cg16420310	CDKL1	95.24 ± 0.72	96.35 ± 0.50	6.11355e-05
cg07384961	CLDN6	14.24 ± 3.74	12.35 ± 3.30	6.12041e-05
cg21245816	LOC153684	35.50 ± 5.34	39.70 ± 5.10	6.14464e-05
cg13326999	Intergenic	40.28 ± 1.72	42.82 ± 1.82	6.29407e-05
cg00791253	KSR2	20.10 ± 9.46	26.25 ± 10.4	6.32531e-05
cg05053978	DCBLD1	36.65 ± 4.45	40.36 ± 4.66	6.33091e-05
cg19448780	Intergenic	53.63 ± 3.18	56.29 ± 3.70	6.33369e-05
cg04677937	TXN	92.63 ± 1.76	94.76 ± 1.53	6.41494e-05
cg12550317	TXNDC17;KIAA0753;TXNDC17	2.92 ± 0.28	2.37 ± 0.28	6.44061e-05
cg00172872	Intergenic	93.84 ± 1.55	95.54 ± 0.65	6.46198e-05
cg05903046	LIMA1;MIR1293;LIMA1	75.68 ± 3.21	82.10 ± 3.13	6.46372e-05
cg13491471	CPT1A;CPT1A	93.35 ± 0.86	94.44 ± 0.89	6.54e-05
cg07271512	Intergenic	60.78 ± 4.83	64.73 ± 5.11	6.57734e-05
cg03649060	ELOF1	70.33 ± 2.56	73.72 ± 1.79	6.61165e-05
cg21166330	FAM71E2	60.57 ± 3.61	63.50 ± 3.85	6.61695e-05
cg05692819	EPC2	63.45 ± 3.57	66.72 ± 4.03	6.6787e-05
cg16191009	CPNE9	46.26 ± 2.40	48.86 ± 2.08	6.72458e-05
cg24138650	TUBB2B	85.56 ± 2.96	89.30 ± 1.74	6.75342e-05
cg14230859	GPD2;GPD2	63.85 ± 3.68	70.80 ± 3.37	6.84974e-05
cg10189029	Intergenic	92.05 ± 1.17	93.71 ± 0.87	6.86421e-05
cg24555468	RASA3	93.95 ± 1.72	95.05 ± 1.64	6.89981e-05
cg04399988	Intergenic	59.19 ± 2.50	61.64 ± 2.78	6.90357e-05
cg05948872	PFKFB2	61.07 ± 5.97	66.32 ± 5.39	6.94385e-05
cg12792367	TFR2	65.22 ± 3.39	68.70 ± 3.06	6.95315e-05
cg14473838	Intergenic	71.23 ± 6.40	75.47 ± 5.69	6.9623e-05
cg22894276	KLRG2	70.60 ± 5.48	73.30 ± 4.71	6.96439e-05
cg10009968	CARD11	93.42 ± 2.31	91.96 ± 2.49	6.98525e-05
cg09510874	WNK1	2.85 ± 0.29	2.54 ± 0.30	7.03253e-05
cg25835936	FRMD4B	94.84 ± 0.84	96.05 ± 0.70	7.05953e-05
cg00648203	NACC2	79.53 ± 2.38	82.86 ± 3.10	7.07335e-05
cg21509978	Intergenic	51.63 ± 12.3	57.46 ± 11.7	7.08614e-05
cg20964456	FOXK1	4.16 ± 0.44	3.53 ± 0.49	7.10865e-05
cg23743778	Intergenic	91.47 ± 1.71	93.97 ± 1.32	7.12223e-05
cg12200412	CD1E;CD1E;CD1E;CD1E;CD1E;CD1E	46.70 ± 3.14	48.89 ± 3.01	7.14625e-05
cg05169988	IGF1R	71.12 ± 2.23	73.49 ± 2.16	7.15805e-05
cg05147714	FAM168A	32.35 ± 2.77	34.89 ± 2.84	7.1601e-05
cg02096607	LGR4;LGR4	6.89 ± 0.58	5.70 ± 0.44	7.18913e-05
cg26539468	CCDC111	89.91 ± 2.46	92.00 ± 1.54	7.27289e-05
cg06259664	RAB11FIP3;RAB11FIP3	91.07 ± 2.14	92.53 ± 1.68	7.3138e-05
cg02685032	CDH4	59.94 ± 2.14	63.43 ± 2.58	7.33831e-05
cg24269511	Intergenic	95.68 ± 1.06	97.03 ± 0.49	7.41689e-05
cg01805890	BCAR1;BCAR1;BCAR1;BCAR1;BCAR1;BCAR1;BCAR1;BCAR1;BCAR1	80.90 ± 3.84	86.36 ± 3.89	7.41991e-05
cg21772011	Intergenic	59.01 ± 3.82	61.04 ± 3.88	7.44586e-05
cg20220121	Intergenic	72.32 ± 3.76	77.31 ± 3.50	7.484e-05
cg20810345	Intergenic	36.90 ± 6.58	31.56 ± 6.19	7.48895e-05
cg00168015	PHACTR1	83.73 ± 2.82	88.20 ± 2.68	7.5205e-05
cg08084655	BTBD17	35.32 ± 11.1	42.82 ± 11.7	7.53676e-05
cg08817424	Intergenic	68.30 ± 2.92	72.16 ± 4.31	7.61736e-05
cg01556112	SEPT6;SEPT6;SEPT6;SEPT6	68.62 ± 7.15	75.70 ± 5.62	7.6575e-05
cg09553242	Intergenic	20.96 ± 2.83	24.77 ± 3.44	7.69403e-05
cg12400790	IQCE;IQCE	83.98 ± 3.60	87.69 ± 2.63	7.71446e-05
cg27568165	SLC45A3	62.39 ± 6.84	67.83 ± 5.92	7.71802e-05
cg00595610	FAM9B	89.80 ± 2.41	91.85 ± 1.54	7.7566e-05
cg06413794	AACS	82.84 ± 1.99	85.83 ± 1.55	7.77396e-05
cg15334356	Intergenic	95.69 ± 0.72	96.56 ± 0.75	7.85578e-05
cg06244927	MYH7B	62.57 ± 7.15	66.13 ± 6.27	7.86639e-05
cg00454305	UNKL	43.96 ± 3.48	47.09 ± 3.59	7.89235e-05
cg02212606	NAT15;NAT15;NAT15	72.41 ± 3.59	75.59 ± 2.39	8.02272e-05
cg20791804	TPTE2;TPTE2;TPTE2	51.25 ± 3.79	56.11 ± 3.04	8.03466e-05
cg18183406	PTRF	74.92 ± 6.14	78.97 ± 4.48	8.05778e-05
cg10059178	EPPK1	95.88 ± 0.77	96.76 ± 0.56	8.12955e-05
cg22942210	Intergenic	74.01 ± 1.58	76.90 ± 1.84	8.18041e-05
cg26478107	Intergenic	25.98 ± 4.65	29.44 ± 4.75	8.19217e-05
cg18081338	Intergenic	28.75 ± 9.50	33.39 ± 10.4	8.20324e-05
cg00232059	PRR5;PRR5;PRR5;PRR5-ARHGAP8;PRR5;PRR5	86.30 ± 3.87	89.09 ± 3.39	8.22691e-05
cg15895391	TRIO	96.26 ± 1.43	97.34 ± 0.99	8.23322e-05
cg18281525	ADRM1;ADRM1	59.00 ± 6.94	63.26 ± 6.91	8.30538e-05
cg11073255	VARS	13.85 ± 1.78	17.51 ± 3.06	8.31084e-05
cg13241807	CD59;CD59;CD59;CD59;CD59;CD59;CD59;CD59	4.28 ± 0.63	3.51 ± 0.50	8.32518e-05
cg24401363	ULK1	94.31 ± 0.92	95.99 ± 0.72	8.34221e-05
cg10922232	GGA3;GGA3	53.35 ± 3.71	55.35 ± 3.60	8.3665e-05
cg04561731	SSBP3;SSBP3;SSBP3	51.76 ± 6.10	55.50 ± 5.66	8.40556e-05
cg19765377	MAT1A	17.90 ± 6.81	21.93 ± 6.28	8.41741e-05
cg01190800	Intergenic	56.75 ± 5.29	60.00 ± 5.40	8.44489e-05
cg27546699	FBXW4	58.45 ± 5.40	62.58 ± 5.76	8.4453e-05
cg14065446	Intergenic	45.13 ± 4.33	47.78 ± 4.99	8.59243e-05
cg04834436	IRX6	12.74 ± 5.09	15.96 ± 5.72	8.62169e-05
cg01222719	PTCH1;PTCH1	88.95 ± 2.31	92.02 ± 1.48	8.63869e-05
cg10024505	Intergenic	70.78 ± 3.80	74.06 ± 3.04	8.65069e-05
cg01598144	Intergenic	23.69 ± 3.97	29.11 ± 5.03	8.66163e-05
cg04945158	DCDC2	28.04 ± 3.92	33.41 ± 4.33	8.76692e-05
cg18138842	PDE6B;PDE6B;PDE6B	72.51 ± 3.18	75.50 ± 3.26	8.83441e-05
cg16645423	SBK1	55.03 ± 3.04	58.66 ± 1.96	8.84391e-05
cg23764008	SYT7	51.37 ± 8.55	55.90 ± 8.90	8.87345e-05
cg15141204	ING5	63.74 ± 5.42	66.65 ± 4.78	8.90145e-05
cg14692457	Intergenic	94.93 ± 0.87	96.22 ± 0.47	8.93167e-05
cg08989277	E2F4	79.15 ± 3.23	82.66 ± 3.16	8.93498e-05
cg26918754	PADI4	52.70 ± 2.45	55.55 ± 3.18	8.968e-05
cg16973520	Intergenic	16.34 ± 2.12	19.43 ± 2.87	9.00362e-05
cg11280756	WFIKKN2	69.71 ± 6.02	73.48 ± 5.39	9.05358e-05
cg16355550	HS3ST4	43.27 ± 3.25	46.04 ± 3.97	9.08242e-05
cg08155994	TMPRSS9	75.80 ± 4.73	80.05 ± 4.62	9.10546e-05
cg18865733	DEFB125	57.63 ± 3.34	61.07 ± 3.04	9.12304e-05
cg16658020	KRTAP2-1	52.85 ± 5.05	57.23 ± 3.86	9.20279e-05
cg00298065	ZNF274;ZNF274;ZNF274	20.90 ± 3.11	22.65 ± 3.28	9.20978e-05
cg23350754	KNDC1	62.17 ± 4.32	66.43 ± 4.45	9.26479e-05
cg20272463	Intergenic	93.33 ± 1.20	95.20 ± 1.02	9.30582e-05
cg02053896	SLC7A3;SLC7A3	11.67 ± 2.72	14.05 ± 3.56	9.3299e-05
cg00651020	MIR1258;ZNF385B	4.47 ± 1.06	3.56 ± 0.95	9.39388e-05
cg02709432	ENPP2;ENPP2;ENPP2	13.43 ± 1.95	17.19 ± 2.27	9.40585e-05
cg25320496	POTEF	42.63 ± 4.35	49.78 ± 3.77	9.40971e-05
cg16257181	PTDSS2	77.13 ± 4.05	80.56 ± 3.21	9.44841e-05
cg04054600	LOC100130987;POLD4	3.52 ± 0.66	3.06 ± 0.60	9.47195e-05
cg14266348	Intergenic	53.99 ± 3.11	58.01 ± 2.61	9.51987e-05
cg23183079	GPR160	95.19 ± 0.48	96.22 ± 0.46	9.57041e-05
cg06538709	Intergenic	51.12 ± 5.14	56.54 ± 5.57	9.57644e-05
cg26945100	VPS4A	90.37 ± 1.29	91.88 ± 0.97	9.60668e-05
cg02760962	TRIM44	27.42 ± 5.30	32.53 ± 4.10	9.61699e-05
cg04559908	DPCR1	63.95 ± 12.9	67.52 ± 12.6	9.63969e-05
cg18971819	IRF7;IRF7;IRF7	14.33 ± 9.28	16.57 ± 10.8	9.64169e-05
cg11838224	TNK1	28.72 ± 10.5	32.17 ± 10.9	9.66986e-05
cg21352158	Intergenic	54.47 ± 4.35	58.46 ± 3.98	9.72115e-05
cg25673668	Intergenic	90.51 ± 2.03	92.57 ± 1.70	9.74278e-05
cg21051046	Intergenic	18.40 ± 3.41	20.89 ± 4.11	9.75437e-05
cg23927469	TBC1D14	28.05 ± 4.70	32.35 ± 4.80	9.76299e-05
cg09625351	GUCY2C	72.37 ± 6.33	78.45 ± 5.65	9.8081e-05
cg22675486	RXRG;RXRG	2.94 ± 0.40	3.55 ± 0.29	9.84277e-05
cg20769700	Intergenic	8.39 ± 1.42	10.10 ± 2.00	9.85306e-05
cg12759166	Intergenic	53.89 ± 2.80	55.77 ± 3.07	9.90124e-05
cg06297571	SFRS8	85.67 ± 1.68	87.98 ± 2.23	9.948e-05
cg04803856	PACS2;PACS2	81.90 ± 3.55	84.96 ± 3.70	0.00010054
cg10200286	Intergenic	64.45 ± 4.25	69.38 ± 2.32	0.000100753
cg06640695	ZBTB17	69.48 ± 3.83	72.84 ± 4.12	0.000100973
cg22330913	U2AF2;U2AF2	91.92 ± 1.62	93.13 ± 1.37	0.000100987
cg03957695	Intergenic	62.40 ± 3.83	65.40 ± 3.89	0.000101013
cg06470440	AGAP1;AGAP1	96.85 ± 0.46	97.61 ± 0.40	0.00010123
cg06370069	CHST3	45.92 ± 9.42	42.96 ± 9.26	0.000101674
cg10499493	RPL31;TBC1D8	75.35 ± 4.28	77.24 ± 3.68	0.000101828
cg22797884	Intergenic	25.94 ± 3.49	29.08 ± 3.31	0.000102004
cg06573096	Intergenic	84.96 ± 3.12	88.67 ± 2.55	0.000102045
cg05207255	Intergenic	77.64 ± 2.36	81.32 ± 1.56	0.000102365
cg17243044	ZBTB12	55.13 ± 2.94	58.15 ± 3.36	0.000102458
cg19761110	AGAP1;AGAP1	42.69 ± 4.63	46.37 ± 4.50	0.000102634
cg27035201	Intergenic	93.43 ± 0.89	94.86 ± 0.90	0.000103033
cg14941654	HLA-G	90.17 ± 1.41	91.97 ± 1.29	0.000103724
cg03590328	TTYH3	61.27 ± 3.61	64.76 ± 4.90	0.00010468
cg14573817	C12orf23	32.17 ± 5.63	35.97 ± 6.45	0.000104775
cg20326936	Intergenic	62.35 ± 6.32	67.71 ± 5.46	0.000104808
cg15061612	VPS52	95.02 ± 0.83	95.93 ± 0.47	0.000104832
cg07292375	Intergenic	82.87 ± 2.15	86.23 ± 2.48	0.000104861
cg02625725	GLTPD1	53.48 ± 3.83	56.40 ± 4.12	0.000105289
cg12086046	MIS12;DERL2	5.54 ± 0.67	6.19 ± 0.58	0.000105503
cg26249046	AGBL4	6.00 ± 1.28	7.57 ± 1.65	0.000105964
cg21595233	Intergenic	65.37 ± 7.36	70.37 ± 7.72	0.000106426
cg15321211	HNRNPF;HNRNPF;HNRNPF	27.87 ± 3.09	31.54 ± 3.73	0.000106601
cg18990588	Intergenic	75.37 ± 3.56	78.78 ± 3.29	0.000106846
cg11704513	COX4I2	46.48 ± 4.82	51.81 ± 5.33	0.000106861
cg06032021	MYOZ1;MYOZ1	51.03 ± 2.96	53.79 ± 3.64	0.000107348
cg07637123	PPP1R3G	4.21 ± 0.93	3.04 ± 0.57	0.000108117
cg23920975	ITPK1	82.25 ± 6.44	84.18 ± 5.96	0.000108191
cg16463557	TMEM105	61.63 ± 3.41	65.26 ± 3.65	0.000108269
cg08034505	GPR125	89.76 ± 2.21	93.05 ± 1.29	0.000108634
cg26014373	OLFML2A	94.83 ± 1.25	96.13 ± 0.79	0.000110025
cg19014730	FKBP5;FKBP5;FKBP5;FKBP5	76.63 ± 3.34	83.95 ± 3.72	0.000110066
cg17792419	ANK3;ANK3	94.66 ± 1.11	96.25 ± 0.59	0.000111195
cg16587707	SLC22A18AS;SLC22A18	71.91 ± 3.65	75.77 ± 2.68	0.000111208
cg17169931	Intergenic	9.51 ± 1.46	8.09 ± 1.36	0.000111238
cg00562553	HOXA4	20.83 ± 2.25	23.91 ± 2.35	0.000111276
cg05791383	ZBTB38	95.75 ± 0.80	96.77 ± 0.48	0.00011131
cg25105745	MIR197	64.67 ± 4.66	69.01 ± 5.31	0.000112213
cg14493899	TAP2;TAP2	92.75 ± 1.54	94.33 ± 0.99	0.000112294
cg13238856	ANO2	73.00 ± 1.86	75.56 ± 1.84	0.000112774
cg00369613	TTC15	96.13 ± 0.92	96.93 ± 0.72	0.000112906
cg05523455	C9orf96;SURF4	8.30 ± 1.00	7.10 ± 0.84	0.000113698
cg06615754	ZNF551	26.70 ± 4.46	29.79 ± 4.33	0.000114079
cg24000816	RAB41	74.18 ± 5.61	77.61 ± 6.33	0.000114209
cg08939373	C11orf41	82.25 ± 3.86	87.75 ± 3.64	0.000114559
cg21357621	Intergenic	2.98 ± 0.38	3.74 ± 0.31	0.000115349
cg24604417	PARP8	81.39 ± 5.82	85.67 ± 5.08	0.000115408
cg00708678	SLC16A12	21.14 ± 3.30	24.90 ± 3.11	0.000116165
cg25875049	TGM5;TGM5	92.81 ± 0.78	93.92 ± 0.50	0.00011631
cg18482576	PODXL2	67.21 ± 4.51	70.96 ± 4.76	0.000116725
cg17145235	Intergenic	78.10 ± 3.76	81.42 ± 3.50	0.000117227
cg17036469	AMPD2;AMPD2;AMPD2	53.45 ± 9.56	61.29 ± 9.20	0.000117474
cg06901094	CSMD2	51.06 ± 2.92	54.66 ± 3.65	0.000117679
cg10553596	NEU4;NEU4;NEU4;NEU4;NEU4	46.19 ± 5.73	49.71 ± 5.94	0.000118601
cg13858974	FRMD3	78.05 ± 2.76	84.14 ± 2.77	0.00011879
cg05114858	UBD	65.18 ± 2.68	69.01 ± 2.69	0.000119534
cg21106136	FAM43A	70.01 ± 4.97	77.93 ± 6.03	0.000119658
cg19203105	AKT1S1;AKT1S1;AKT1S1	94.24 ± 0.87	95.16 ± 0.62	0.000120482
cg24330386	CHPF;TMEM198	45.27 ± 3.70	47.53 ± 3.62	0.000121093
cg24353779	C10orf75	3.84 ± 0.54	4.62 ± 0.67	0.000121242
cg02312525	MLC1	52.25 ± 2.57	56.64 ± 3.03	0.000121489
cg08241330	ABAT;ABAT	32.73 ± 15.4	39.58 ± 17.4	0.000121661
cg10202457	NMNAT2	8.96 ± 3.26	11.56 ± 3.40	0.000122729
cg15951661	MAP3K9	15.78 ± 3.43	18.71 ± 3.14	0.000123304
cg19906672	TBC1D14;TBC1D14	50.82 ± 6.76	54.87 ± 6.90	0.00012429
cg08941824	PRRT3	4.78 ± 1.67	5.87 ± 1.85	0.000124399
cg11352339	YIPF3	47.47 ± 5.52	53.56 ± 6.06	0.000124522
cg26227935	PQLC1;PQLC1;PQLC1	96.45 ± 0.91	97.32 ± 0.77	0.000124896
cg21078065	C20orf151	85.94 ± 2.64	87.23 ± 2.59	0.000125014
cg19720414	CLEC4D	83.89 ± 2.73	86.72 ± 2.45	0.000125598
cg23689004	INTS1	94.24 ± 0.93	95.35 ± 0.56	0.00012573
cg18280699	MUC5B	95.93 ± 0.65	96.75 ± 0.47	0.000126407
cg18895859	CROCCL1	63.69 ± 3.74	66.59 ± 3.15	0.000126438
cg10789281	ACSS3;ACSS3	3.13 ± 0.66	2.49 ± 0.58	0.000128049
cg00950244	NDUFAF4	51.11 ± 4.33	54.70 ± 4.34	0.00012826
cg03022438	Intergenic	54.60 ± 2.35	58.07 ± 1.53	0.00012946
cg07828233	WWC2	76.52 ± 4.16	82.52 ± 2.31	0.000129548
cg14940760	PRKDC;PRKDC	88.90 ± 1.72	91.21 ± 1.53	0.000129841
cg05744184	STAT5A	55.19 ± 5.68	59.04 ± 5.63	0.000130319
cg01163515	ACTR8	97.20 ± 0.49	97.93 ± 0.33	0.000130575
cg24140586	CYP2C9	87.23 ± 2.51	90.43 ± 2.84	0.000130811
cg10859789	COL6A3;COL6A3;COL6A3	58.50 ± 4.83	62.10 ± 4.93	0.000131412
cg00748827	Intergenic	91.25 ± 1.46	92.66 ± 0.96	0.000131893
cg13293535	GATA4	53.51 ± 9.04	59.73 ± 9.43	0.000132467
cg20250922	AFF1	50.75 ± 3.56	56.05 ± 3.40	0.000132536
cg21124714	P2RY6;P2RY6;P2RY6;P2RY6	80.87 ± 3.47	85.02 ± 2.44	0.000132956
cg17670263	MIR520C	48.51 ± 5.51	52.23 ± 4.92	0.000133118
cg03205252	Intergenic	9.97 ± 1.68	11.35 ± 1.54	0.000133198
cg14422093	Intergenic	62.81 ± 6.37	66.27 ± 5.23	0.000133592
cg04889790	MORN1	55.22 ± 2.78	59.16 ± 3.50	0.000133916
cg03999137	SLC22A12;SLC22A12	91.22 ± 1.66	92.75 ± 1.74	0.000133952
cg26740639	LOC285370	45.13 ± 1.64	47.74 ± 1.90	0.000134119
cg17203447	Intergenic	86.87 ± 2.24	89.29 ± 1.38	0.000134436
cg13901453	BLCAP;BLCAP;BLCAP;BLCAP;NNAT;NNAT;BLCAP	72.09 ± 8.85	76.44 ± 6.94	0.0001349
cg02543202	PTPN4	27.25 ± 1.78	29.79 ± 2.07	0.000135
cg03338754	F7;F7	10.44 ± 1.96	12.52 ± 2.49	0.000135042
cg14179148	Intergenic	78.11 ± 5.77	83.75 ± 4.13	0.000135144
cg09936933	STARD10	57.53 ± 6.15	60.76 ± 6.01	0.000135149
cg20132791	SLC26A8;SLC26A8	66.70 ± 2.32	69.93 ± 2.19	0.000135161
cg15916554	Intergenic	39.04 ± 14.1	44.43 ± 13.7	0.000135621
cg16579646	HSD3B1	87.81 ± 2.10	90.81 ± 1.40	0.00013593
cg16713009	IRGC	91.41 ± 1.81	92.98 ± 1.26	0.000136772
cg02537800	ACOX3;ACOX3	96.83 ± 0.57	97.49 ± 0.38	0.000137141
cg02577078	CABP1;CABP1;CABP1	65.19 ± 4.01	70.37 ± 2.34	0.000137224
cg01566127	MACROD1	14.03 ± 9.43	15.98 ± 9.37	0.00013812
cg20525229	CUX2	93.04 ± 1.78	93.88 ± 1.70	0.00013832
cg01593969	MYH6	65.45 ± 4.38	68.02 ± 4.13	0.000138901
cg15794034	AMICA1;AMICA1	57.69 ± 5.45	62.72 ± 5.93	0.000140081
cg16270472	Intergenic	92.50 ± 1.13	93.67 ± 0.78	0.000140265
cg25156443	SFRP5	10.58 ± 1.45	9.01 ± 1.10	0.00014037
cg26446071	ATP4B	64.60 ± 6.68	68.22 ± 6.80	0.000140404
cg04315682	SNAPIN	40.35 ± 3.72	45.28 ± 2.91	0.000140495
cg06366374	LOC285780	59.81 ± 4.02	63.69 ± 4.50	0.000140576
cg24867501	MIOX	46.77 ± 5.81	49.52 ± 5.41	0.000141204
cg05564293	WDR46;WDR46	92.92 ± 1.13	94.30 ± 0.84	0.000141364
cg27160738	SFRS5;SFRS5	83.29 ± 2.98	85.83 ± 2.79	0.000141664
cg22902532	CHRDL2	77.89 ± 2.24	82.03 ± 2.42	0.000141725
cg00087971	Intergenic	93.76 ± 1.21	95.47 ± 1.05	0.000142703
cg07046369	PAX2;PAX2;PAX2;PAX2;PAX2	17.32 ± 5.52	20.31 ± 5.87	0.000142984
cg05055821	Intergenic	72.83 ± 4.58	76.42 ± 4.91	0.00014309
cg12951997	Intergenic	69.65 ± 3.23	73.85 ± 2.71	0.00014316
cg14750215	ACBD4;ACBD4;ACBD4;ACBD4;ACBD4	80.46 ± 3.53	85.65 ± 2.32	0.000143342
cg00426963	KIF27	2.07 ± 0.41	2.55 ± 0.34	0.000143865
cg23569968	SCGB1A1	86.90 ± 1.81	89.35 ± 2.10	0.000144398
cg16295030	FAM81B	62.41 ± 11.2	69.56 ± 9.51	0.000144597
cg10215079	TAC3	67.35 ± 3.67	70.93 ± 2.71	0.000145024
cg16270633	Intergenic	76.54 ± 2.92	79.94 ± 2.84	0.000145946
cg01407927	C10orf76	59.55 ± 2.33	63.68 ± 2.56	0.00014595
cg25294906	FGFR2;FGFR2;FGFR2;FGFR2;FGFR2;FGFR2;FGFR2;FGFR2;FGFR2	91.17 ± 1.08	92.41 ± 1.15	0.000146184
cg25591260	PSMD8	56.14 ± 5.15	60.12 ± 4.32	0.000147068
cg25670451	SCNN1A	94.02 ± 0.61	94.81 ± 0.60	0.00014715
cg06595852	DOCK7	4.68 ± 0.50	5.34 ± 0.46	0.00014771
cg14504259	Intergenic	19.61 ± 4.96	23.04 ± 4.45	0.000149521
cg20637915	Intergenic	58.88 ± 4.28	63.02 ± 4.35	0.000149824
cg04762129	Intergenic	63.57 ± 3.35	67.75 ± 2.90	0.000149969
cg04796525	JAM3	16.93 ± 6.25	21.23 ± 7.76	0.000151409
cg25458010	GALNT9	63.24 ± 2.60	65.77 ± 2.39	0.000151905
cg05169499	Intergenic	77.78 ± 5.13	81.72 ± 4.85	0.000152124
cg21348586	TRAPPC9;TRAPPC9	93.84 ± 1.30	95.16 ± 0.68	0.000152218
cg09584118	SYT13	50.46 ± 3.96	53.52 ± 3.77	0.000152301
cg26856369	LOC134466	94.76 ± 1.70	96.50 ± 1.10	0.000152707
cg05850338	Intergenic	77.52 ± 4.61	81.96 ± 3.17	0.000152833
cg25333529	LIMK1	85.49 ± 3.69	87.79 ± 3.52	0.000153948
cg13647536	Intergenic	23.69 ± 3.78	27.09 ± 4.40	0.000154167
cg13495204	ALB	87.66 ± 3.14	89.97 ± 2.25	0.000154237
cg27212940	LOC399959	80.73 ± 3.00	84.26 ± 2.52	0.000154346
cg26208419	SLC9A3;LOC25845	4.90 ± 0.99	4.06 ± 0.74	0.000154508
cg01098431	DUS3L;DUS3L	90.66 ± 1.28	92.64 ± 1.15	0.000154534
cg13716840	Intergenic	84.08 ± 3.16	87.44 ± 1.79	0.000155179
cg01132443	MFSD11	15.76 ± 2.24	18.49 ± 3.14	0.000155182
cg02852847	Intergenic	77.12 ± 3.66	81.54 ± 3.28	0.000156627
cg09916234	WHSC1;WHSC1;WHSC1;SCARNA22;WHSC1	65.94 ± 2.23	70.01 ± 2.57	0.00015677
cg25945499	ZC3H3	78.42 ± 7.00	82.16 ± 6.70	0.000156785
cg11445094	Intergenic	4.46 ± 1.20	5.39 ± 1.18	0.000156969
cg04684390	TCTN2;TCTN2	90.51 ± 1.33	92.98 ± 1.56	0.000157138
cg08716736	C20orf79	71.12 ± 3.68	75.79 ± 4.50	0.000157268
cg12477608	KLHL13;KLHL13;KLHL13;KLHL13;KLHL13;KLHL13	53.97 ± 10.1	61.10 ± 9.83	0.000157698
cg05789250	C6orf48;C6orf48;SNORD52	35.51 ± 3.93	39.21 ± 5.05	0.000157703
cg02670466	NBEAL2	82.04 ± 5.15	84.13 ± 3.98	0.00015837
cg01075463	FAM108A1;FAM108A1	90.65 ± 1.74	92.60 ± 1.45	0.00015883
cg08320861	HLA-DPB2	69.63 ± 3.99	73.16 ± 3.58	0.000159006
cg18073883	HLA-DOB	78.69 ± 4.45	81.45 ± 4.22	0.000159065
cg21176488	LPP;LPP;LPP	93.26 ± 1.47	94.76 ± 0.99	0.000159147
cg17515753	Intergenic	3.91 ± 0.49	4.36 ± 0.59	0.000159455
cg04268624	Intergenic	19.33 ± 3.61	22.79 ± 4.36	0.000160124
cg02489377	OR1B1	60.15 ± 4.79	62.78 ± 5.06	0.000160758
cg23496534	Intergenic	72.39 ± 3.32	75.37 ± 3.50	0.000161162
cg03709012	GATAD2A	4.50 ± 1.12	3.78 ± 1.00	0.000161477
cg01005937	Intergenic	61.77 ± 5.36	65.65 ± 4.80	0.00016299
cg04110478	Intergenic	62.03 ± 4.97	65.95 ± 5.70	0.000163273
cg04111467	IQCG;IQCG	86.07 ± 2.59	88.96 ± 2.92	0.000163682
cg21047429	ZNF628	81.24 ± 4.42	84.36 ± 4.23	0.000163896
cg15323528	CDH23;CDH23	8.27 ± 4.78	10.12 ± 5.23	0.000164241
cg00391025	TFG;TFG	47.97 ± 3.31	51.83 ± 2.50	0.000164423
cg10505791	HYOU1;HYOU1	6.11 ± 0.56	5.33 ± 0.53	0.00016483
cg06956052	ATP1A4	47.61 ± 4.56	51.85 ± 4.60	0.00016575
cg04512917	EDIL3	11.60 ± 2.52	13.78 ± 2.54	0.00016614
cg02940714	Intergenic	32.45 ± 7.17	34.75 ± 6.52	0.000166678
cg22730459	DLG2;DLG2;DLG2	13.35 ± 2.36	16.29 ± 3.16	0.000167072
cg00400452	Intergenic	64.17 ± 3.79	67.18 ± 3.75	0.000167184
cg23424400	ZCCHC8	28.58 ± 2.36	31.29 ± 2.23	0.000167735
cg13781475	ROD1;ROD1;ROD1	69.39 ± 4.52	78.55 ± 4.78	0.000167966
cg18323589	Intergenic	67.49 ± 11.8	76.59 ± 10.5	0.000168676
cg01101177	MICB	60.19 ± 5.06	64.40 ± 4.13	0.000168705
cg11194925	PAX9	20.52 ± 3.90	25.10 ± 4.53	0.000168838
cg26549831	NINJ2	92.47 ± 1.46	94.96 ± 1.29	0.00016887
cg19890033	COX15;CUTC;COX15	4.71 ± 0.84	4.09 ± 0.74	0.000169259
cg26924044	Intergenic	42.47 ± 4.05	47.88 ± 3.67	0.000169513
cg08258350	SNORD41;TNPO2;TNPO2;TNPO2	72.92 ± 6.74	76.96 ± 5.76	0.000169599
cg22250586	STARD13;STARD13;STARD13	87.26 ± 2.31	89.85 ± 2.11	0.000169641
cg22281638	IHH	97.29 ± 0.46	97.97 ± 0.33	0.000170037
cg16219124	CLPTM1L	73.19 ± 2.36	75.53 ± 2.20	0.000170115
cg07713331	FOXK1	71.43 ± 3.88	75.84 ± 3.22	0.000170359
cg12277698	CTSO	94.64 ± 1.58	96.25 ± 0.97	0.000171167
cg00963786	WWP2;WWP2	41.27 ± 9.93	45.03 ± 10.6	0.000171179
cg13625388	Intergenic	37.11 ± 13.7	46.14 ± 15.0	0.000171198
cg01532075	BFSP2	70.84 ± 5.76	74.34 ± 5.13	0.000172525
cg15215830	Intergenic	51.65 ± 2.22	55.38 ± 2.44	0.000172575
cg25513535	RBM11	44.39 ± 4.52	49.18 ± 4.43	0.000172682
cg01471843	Intergenic	93.70 ± 1.05	94.96 ± 0.77	0.000173755
cg00226754	TMED2	4.11 ± 0.34	4.76 ± 0.49	0.000174877
cg08592707	PPM1E	3.33 ± 0.66	4.12 ± 0.97	0.000175203
cg27315109	AFF3;AFF3	92.49 ± 0.94	94.36 ± 0.98	0.000175215
cg01152302	ADAMTSL3	18.61 ± 4.29	22.02 ± 4.44	0.000175722
cg26721877	STC2	27.73 ± 5.02	25.64 ± 4.86	0.000175743
cg12446303	DACT2	66.26 ± 11.3	70.82 ± 10.3	0.000175787
cg17448336	Intergenic	26.12 ± 3.08	28.74 ± 3.51	0.000176516
cg09245698	SYTL3	59.18 ± 8.71	64.47 ± 8.52	0.000177061
cg04723390	C14orf165	88.69 ± 2.28	91.43 ± 1.07	0.00017739
cg02127689	Intergenic	63.48 ± 3.01	66.12 ± 3.20	0.000178533
cg16437184	Intergenic	49.48 ± 12.8	56.53 ± 12.6	0.000179459
cg23980760	ACCSL;ACCSL	78.55 ± 3.40	81.61 ± 2.43	0.000180083
cg27458152	SLC39A14;SLC39A14;SLC39A14;SLC39A14	46.65 ± 5.31	50.26 ± 5.42	0.00018053
cg11293241	MAP7D1	78.63 ± 8.49	84.37 ± 5.33	0.000180721
cg14391730	Intergenic	92.08 ± 2.08	93.26 ± 2.22	0.00018091
cg26818010	INPP5A	95.03 ± 0.79	95.83 ± 0.74	0.000180999
cg02726819	LOC154822	55.26 ± 3.34	58.39 ± 3.65	0.000181529
cg07158961	KIF17;KIF17	91.60 ± 1.23	93.57 ± 0.99	0.00018216
cg07370496	Intergenic	38.15 ± 2.53	41.09 ± 3.79	0.000182552
cg08712572	NUAK2	71.53 ± 2.49	79.31 ± 4.79	0.000182889
cg06644457	KNDC1	49.05 ± 4.36	51.78 ± 4.22	0.000183484
cg02616558	CSMD1	65.32 ± 5.81	69.01 ± 6.42	0.00018355
cg08391020	Intergenic	53.90 ± 11.3	59.81 ± 10.5	0.000184224
cg19180602	RPL38;RPL38	14.23 ± 1.60	16.61 ± 1.26	0.00018458
cg00845626	GNL3;GNL3;GNL3;SNORD69	85.04 ± 1.99	87.58 ± 1.67	0.000184585
cg09554509	HOXA13	17.58 ± 2.51	20.08 ± 3.73	0.000184731
cg19138538	GPR44;GPR44	26.77 ± 9.33	31.42 ± 10.4	0.000184787
cg20619808	SEZ6;SEZ6	43.89 ± 3.93	47.55 ± 4.21	0.000184909
cg06895946	UBE2I;UBE2I;UBE2I;UBE2I	71.05 ± 4.73	74.63 ± 5.33	0.000186332
cg00545966	C16orf86;C16orf48	22.68 ± 3.50	24.96 ± 3.68	0.000186758
cg02088673	DAGLA	57.68 ± 1.86	60.50 ± 2.09	0.000186841
cg05776630	TMCO4	65.09 ± 2.61	67.78 ± 2.27	0.000186845
cg14725719	RET;RET	79.07 ± 3.87	82.21 ± 3.54	0.000187118
cg09292660	Intergenic	75.31 ± 2.87	80.06 ± 2.41	0.000187435
cg10805582	Intergenic	38.49 ± 7.83	44.55 ± 6.40	0.0001875
cg00502444	Intergenic	59.62 ± 4.05	63.40 ± 3.87	0.00018817
cg11612617	IGF1;IGF1;IGF1;IGF1	15.61 ± 4.71	18.76 ± 5.67	0.000188201
cg16765531	Intergenic	71.41 ± 9.34	77.90 ± 6.83	0.000188262
cg15986587	Intergenic	75.79 ± 3.80	81.77 ± 3.82	0.000188488
cg08918272	Intergenic	88.90 ± 2.63	91.20 ± 2.18	0.000189007
cg21497236	C19orf46	80.17 ± 2.06	82.39 ± 1.97	0.000189281
cg00764840	LOC145814	60.75 ± 2.28	66.25 ± 2.59	0.00019013
cg12840336	Intergenic	39.07 ± 5.47	43.92 ± 5.08	0.000190918
cg05128201	Intergenic	95.70 ± 0.76	97.01 ± 0.48	0.000191212
cg08641170	C1orf212;C1orf212;C1orf212;C1orf212	4.05 ± 0.55	3.51 ± 0.39	0.000191654
cg26893605	GALNT2	60.51 ± 5.96	65.49 ± 6.11	0.000193323
cg21226253	IL11RA;IL11RA	80.49 ± 4.24	83.98 ± 3.61	0.000194683
cg04406200	FMN2	90.80 ± 1.86	93.52 ± 1.57	0.000194953
cg13905606	MIR211;TRPM1	63.26 ± 11.3	72.69 ± 9.64	0.000195472
cg01087977	DNAJB2;DNAJB2	57.35 ± 7.48	60.59 ± 7.08	0.000195637
cg24983628	Intergenic	64.31 ± 5.24	69.07 ± 5.69	0.000196274
cg06087498	TCF25	90.69 ± 2.29	92.40 ± 2.23	0.000196718
cg19917412	NAALADL1	41.06 ± 4.45	43.76 ± 3.85	0.000197129
cg14429427	LPAR1;LPAR1	81.98 ± 4.22	84.62 ± 4.04	0.00019718
cg24049493	HIVEP3;HIVEP3	42.06 ± 5.84	45.05 ± 5.60	0.0001977
cg05371064	MAN1A1	7.44 ± 1.38	5.58 ± 0.51	0.000197893
cg19350970	Intergenic	58.20 ± 6.03	62.14 ± 5.15	0.000197911
cg00736915	P2RX4	95.96 ± 0.80	96.77 ± 0.57	0.000199416
cg05597748	FAM41C	59.97 ± 7.65	65.45 ± 8.00	0.000199763
cg03175417	C22orf25	72.22 ± 3.49	75.45 ± 2.21	0.000200488
cg05389084	VEPH1;VEPH1;PTX3;VEPH1	77.16 ± 3.22	82.22 ± 2.51	0.000200807
cg19730887	NR2C2	59.84 ± 8.94	64.84 ± 8.47	0.000200925
cg21944557	CEP350	4.85 ± 0.45	4.05 ± 0.48	0.000202217
cg06134567	PKDREJ	54.84 ± 4.04	58.17 ± 4.84	0.000203292
cg16500097	TOMM70A	72.33 ± 3.58	76.58 ± 2.78	0.000203317
cg23058911	C5AR1	63.47 ± 3.78	67.16 ± 2.64	0.00020347
cg11884385	KCNK10;KCNK10;KCNK10	95.75 ± 0.46	96.39 ± 0.47	0.000203919
cg20899718	Intergenic	72.89 ± 2.87	76.22 ± 2.34	0.000204694
cg18585988	NKPD1	10.57 ± 2.53	8.76 ± 1.37	0.000205322
cg18874953	PRDX1;PRDX1;PRDX1	54.05 ± 1.32	56.10 ± 1.82	0.000205418
cg26994334	ZNF148;ZNF148	5.90 ± 0.66	7.07 ± 0.72	0.000205484
cg14059835	C9orf78;USP20;USP20;USP20	55.84 ± 5.04	60.03 ± 4.26	0.000205552
cg04702527	CCRN4L	43.30 ± 4.94	47.54 ± 5.21	0.000206129
cg19645788	AKT1;AKT1;AKT1	44.10 ± 3.04	47.57 ± 3.22	0.000206343
cg05453071	PDE5A;PDE5A;PDE5A	73.64 ± 7.62	80.37 ± 6.41	0.000206447
cg02605237	TBCD	91.07 ± 1.76	92.66 ± 0.91	0.000206741
cg05976840	TRADD	51.64 ± 3.95	53.75 ± 3.32	0.000206767
cg11990813	KIAA0664	80.73 ± 2.82	83.51 ± 2.89	0.000206914
cg27253757	EHMT2;EHMT2	93.93 ± 1.15	95.61 ± 0.74	0.000208573
cg12056138	C15orf60	91.44 ± 1.50	92.88 ± 1.44	0.000208647
cg09414620	CACNA1H;CACNA1H	54.23 ± 4.78	57.69 ± 5.41	0.000208691
cg09664554	Intergenic	77.54 ± 3.68	80.85 ± 2.39	0.0002088
cg21224025	WNT7A	72.75 ± 7.46	76.04 ± 7.05	0.000208862
cg24524057	Intergenic	25.62 ± 1.86	28.70 ± 2.29	0.000209042
cg10654510	C21orf121	52.99 ± 6.18	58.64 ± 5.48	0.000209626
cg05860190	PLAGL2	45.81 ± 4.65	50.17 ± 3.95	0.000209823
cg20843095	Intergenic	83.87 ± 4.56	86.79 ± 4.05	0.000209963
cg14346461	Intergenic	10.04 ± 1.66	8.73 ± 1.43	0.000210178
cg07295669	MYO1B;MYO1B;MYO1B	92.93 ± 0.99	94.01 ± 0.97	0.000210321
cg06480663	MS4A14;MS4A14	75.85 ± 4.46	80.72 ± 5.06	0.00021047
cg16196968	Intergenic	58.90 ± 8.78	64.74 ± 8.50	0.000210723
cg14771301	Intergenic	82.03 ± 2.87	85.66 ± 2.30	0.00021092
cg00347563	GIPC2;GIPC2	10.83 ± 2.26	9.01 ± 1.60	0.00021129
cg25882056	ALG12;CRELD2;CRELD2	79.56 ± 2.27	83.30 ± 2.39	0.000211744
cg11860075	SLIT3	90.72 ± 1.40	92.13 ± 1.02	0.000212155
cg06969521	PBXIP1	74.94 ± 6.08	79.81 ± 5.10	0.000212602
cg18278638	SLC7A14	28.80 ± 3.13	31.53 ± 2.73	0.000213436
cg00072587	MAP3K15	23.94 ± 8.54	29.62 ± 9.54	0.00021346
cg02924834	KLHDC4	75.83 ± 2.44	79.59 ± 2.32	0.000213683
cg13725579	SFXN1	91.54 ± 0.57	90.42 ± 0.84	0.000213969
cg19219672	P4HB	66.41 ± 3.07	70.12 ± 3.89	0.00021478
cg14073571	VIPR2	23.88 ± 8.35	26.33 ± 8.30	0.000216037
cg14546712	AGPAT6	97.18 ± 0.45	97.78 ± 0.35	0.000216424
cg18862888	Intergenic	83.41 ± 2.10	86.33 ± 1.80	0.000216594
cg02249390	LTB;LTB	83.12 ± 3.63	86.43 ± 2.99	0.000217308
cg27168033	EEF2;SNORD37	64.98 ± 4.01	68.22 ± 4.25	0.000217619
cg15207055	SH3D19;SH3D19;SH3D19;SH3D19	68.92 ± 10.9	74.88 ± 8.64	0.000217833
cg08293086	MRPS21;MRPS21;MRPS21	5.53 ± 1.22	8.34 ± 1.51	0.000218539
cg09762252	CALN1;CALN1	40.35 ± 3.46	45.79 ± 3.43	0.00021914
cg24124365	ZNF324	81.18 ± 3.25	84.69 ± 2.03	0.000219501
cg08549335	ZNRF2	54.47 ± 14.3	62.56 ± 12.7	0.000220224
cg16306633	ZNF786	61.80 ± 4.64	65.65 ± 4.56	0.000221353
cg18235146	C2orf49	2.67 ± 0.49	2.09 ± 0.36	0.000221472
cg03846892	Intergenic	93.84 ± 1.18	95.91 ± 1.02	0.000221505
cg20652899	FXYD6;FXYD6;FXYD6;FXYD6;FXYD6	47.04 ± 10.4	52.28 ± 11.7	0.000221546
cg11753004	Intergenic	60.21 ± 3.21	62.49 ± 2.83	0.000221611
cg27582546	Intergenic	92.58 ± 1.16	93.92 ± 1.29	0.000221858
cg16336494	MTHFD1L	48.44 ± 14.9	55.82 ± 14.4	0.000221907
cg03128192	JPH3	6.15 ± 0.83	6.95 ± 0.65	0.000222646
cg17930583	GABBR1;GABBR1;GABBR1	64.77 ± 3.39	67.53 ± 2.78	0.000222735
cg15570464	Intergenic	66.47 ± 1.67	68.93 ± 2.11	0.000223043
cg00227110	Intergenic	68.47 ± 4.76	71.61 ± 4.29	0.000223332
cg07937091	ZPBP;ZPBP	58.40 ± 3.90	63.91 ± 2.72	0.000224038
cg15221642	Intergenic	32.53 ± 7.64	36.34 ± 8.34	0.000224563
cg01850230	ACOX3;ACOX3	86.28 ± 2.20	89.15 ± 1.53	0.000224763
cg00205905	PRRG1;PRRG1	45.40 ± 7.56	49.76 ± 6.77	0.000224777
cg09459982	CUTA;CUTA;SYNGAP1;CUTA;CUTA;CUTA	49.96 ± 4.15	52.33 ± 3.54	0.000225133
cg22956310	ADCY3	5.61 ± 0.61	4.53 ± 0.59	0.000225212
cg12658495	Intergenic	84.72 ± 2.44	87.95 ± 1.63	0.000225306
cg20319142	LAMP1	82.43 ± 3.44	85.07 ± 3.13	0.000226253
cg02668075	EDAR	81.14 ± 2.83	84.28 ± 3.23	0.000226665
cg27090975	AKAP8L	53.52 ± 9.55	57.81 ± 10.5	0.000226952
cg07370352	KIAA1026;KIAA1026;KIAA1026;KIAA1026	57.85 ± 2.37	61.73 ± 2.24	0.000227337
cg04362800	MAP3K7IP2	83.32 ± 5.82	87.19 ± 4.11	0.000227758
cg14435092	LOC100128731	4.00 ± 0.78	3.07 ± 0.42	0.000228335
cg00756648	FBXO46	70.75 ± 3.85	75.28 ± 4.80	0.000228615
cg13611094	YIPF2	63.35 ± 2.95	66.10 ± 3.16	0.000228936
cg16920418	Intergenic	63.86 ± 2.11	66.58 ± 2.62	0.000229411
cg25428297	CYP2W1;CYP2W1	44.17 ± 4.20	46.93 ± 4.07	0.000229792
cg07334429	Intergenic	66.21 ± 2.39	68.88 ± 2.51	0.000230031
cg02523014	CDC42SE2;CDC42SE2	95.88 ± 0.56	96.94 ± 0.46	0.000230199
cg23790050	TSNARE1	93.90 ± 0.79	94.85 ± 0.79	0.000231446
cg05651185	Intergenic	95.10 ± 1.22	96.59 ± 0.79	0.000231649
cg26145959	SPATS1	20.81 ± 11.3	25.07 ± 11.9	0.000231742
cg23877868	PPP2R5A;SNORA16B	94.97 ± 1.19	96.24 ± 0.90	0.000232059
cg01510051	ZNF542;ZNF542;ZNF542;ZNF542	56.38 ± 2.98	58.66 ± 3.33	0.000232137
cg10015444	Intergenic	64.99 ± 9.06	70.38 ± 9.66	0.000233012
cg22666598	Intergenic	90.19 ± 1.91	93.12 ± 0.80	0.00023313
cg11614474	SVIL;SVIL	96.86 ± 0.72	97.78 ± 0.59	0.000233219
cg17820039	KIAA1199	92.55 ± 1.25	93.59 ± 1.13	0.000234859
cg22651812	NRG1	38.68 ± 8.60	46.41 ± 9.60	0.000236295
cg14308375	PITX2;PITX2;PITX2	23.21 ± 1.58	25.87 ± 2.17	0.000236392
cg25101291	MIR200A;MIR429	48.03 ± 11.7	52.06 ± 12.6	0.000236836
cg22586405	CDH22	29.15 ± 6.65	32.74 ± 6.78	0.000237487
cg19699628	SELT	2.54 ± 0.27	2.01 ± 0.32	0.000237579
cg00258203	Intergenic	84.34 ± 3.86	87.27 ± 3.62	0.000238611
cg21548749	ATF6B;ATF6B;FKBPL	54.04 ± 3.06	56.67 ± 3.67	0.000239372
cg13977660	USP42	54.90 ± 2.31	59.77 ± 2.97	0.000240108
cg26269511	Intergenic	76.81 ± 7.27	80.98 ± 6.34	0.000240297
cg11550971	IMPA2	12.01 ± 1.06	10.45 ± 1.45	0.000240363
cg04272615	TNXB	86.95 ± 3.93	89.64 ± 2.39	0.000242561
cg10872457	Intergenic	73.94 ± 3.36	77.46 ± 3.02	0.000242909
cg15727285	Intergenic	42.02 ± 5.95	46.65 ± 6.82	0.000243029
cg20383155	NEU1;SLC44A4	8.07 ± 5.05	10.44 ± 6.14	0.000243551
cg08513681	MYO1E	6.97 ± 0.53	8.09 ± 0.67	0.000243624
cg20592656	TNRC18	96.44 ± 0.39	97.18 ± 0.43	0.000244025
cg15729230	FASLG	93.79 ± 0.80	95.17 ± 0.68	0.00024421
cg14624731	Intergenic	72.42 ± 6.13	75.56 ± 5.52	0.000244288
cg09552240	Intergenic	85.15 ± 3.01	86.76 ± 2.34	0.000244836
cg12954591	IRF2BP2;IRF2BP2	3.46 ± 0.52	2.66 ± 0.49	0.000246915
cg22337128	C14orf23;C14orf23	4.07 ± 0.77	4.86 ± 0.64	0.000247454
cg08247587	Intergenic	27.02 ± 4.64	31.50 ± 4.87	0.000248746
cg26945361	ZNF681	32.16 ± 3.68	35.39 ± 4.18	0.00024947
cg12184421	CD247;CD247	35.27 ± 9.74	41.02 ± 10.7	0.000249541
cg10566578	UNC119B	71.43 ± 2.09	73.96 ± 2.52	0.000250261
cg05671636	RNF130	47.01 ± 13.2	52.54 ± 13.5	0.000250316
cg21193660	Intergenic	63.01 ± 4.13	67.36 ± 5.01	0.000250671
cg27034450	VPS28;VPS28	78.85 ± 4.05	83.21 ± 4.35	0.000250866
cg00462488	Intergenic	78.55 ± 2.62	81.90 ± 2.85	0.000250913
cg11017155	MCF2L;MCF2L	58.66 ± 7.22	62.35 ± 7.92	0.000252343
cg20366633	TAP2;TAP2	61.91 ± 2.47	64.68 ± 2.55	0.000253221
cg14940043	Intergenic	77.20 ± 5.36	81.37 ± 4.76	0.000253355
cg05512482	ZFPM1	96.42 ± 0.84	97.48 ± 0.79	0.000253665
cg09550945	Intergenic	61.70 ± 4.19	64.90 ± 3.11	0.000254101
cg26269196	Intergenic	94.30 ± 1.26	95.59 ± 1.37	0.000254265
cg17741629	SETDB2;SETDB2	66.41 ± 7.65	73.37 ± 6.80	0.000254635
cg26038749	SORCS2	48.53 ± 5.90	52.14 ± 6.27	0.00025556
cg06476964	Intergenic	94.10 ± 1.69	95.84 ± 1.36	0.000256228
cg27366810	Intergenic	42.43 ± 3.32	46.22 ± 3.32	0.000256684
cg05316694	Intergenic	52.54 ± 3.08	56.33 ± 2.60	0.000257527
cg10380760	RPL13AP5;SNORD33;SNORD35A;SNORD34;RPL13A;SNORD32A	54.01 ± 1.65	55.70 ± 1.66	0.000257819
cg22961275	SELV;SELV	6.38 ± 0.87	4.73 ± 0.92	0.000258071
cg07512295	UGT1A6;UGT1A10;UGT1A9;UGT1A7;UGT1A8	77.90 ± 1.64	81.57 ± 2.79	0.000258098
cg06457408	ARHGDIA	50.30 ± 2.71	53.73 ± 2.72	0.000258589
cg11861491	DEFB123	53.41 ± 4.02	56.83 ± 2.37	0.000258641
cg03168922	FASTK;TMUB1;TMUB1;FASTK	50.46 ± 3.09	53.33 ± 3.25	0.000258671
cg11445242	ZNF609	80.39 ± 3.17	84.96 ± 2.27	0.000258998
cg25391198	Intergenic	93.34 ± 1.55	95.57 ± 1.09	0.000259607
cg09869950	FGGY;FGGY	75.84 ± 8.33	80.22 ± 6.96	0.000259965
cg05057291	NLRC4	96.04 ± 0.84	96.93 ± 0.52	0.000260054
cg13543254	FMN1	60.13 ± 7.75	66.46 ± 7.79	0.000260205
cg09784168	DOCK4	69.54 ± 5.38	74.43 ± 4.22	0.000260946
cg15118519	ZNF683;ZNF683	56.36 ± 2.38	60.08 ± 1.32	0.00026118
cg14393567	FKBP6;FKBP6;TRIM50	94.58 ± 1.03	95.64 ± 0.71	0.000261394
cg17978995	TNXB	78.44 ± 5.54	81.12 ± 4.64	0.000262392
cg14203032	Intergenic	5.24 ± 0.56	4.61 ± 0.46	0.000263917
cg03918756	TRAPPC9;TRAPPC9	59.56 ± 13.5	67.30 ± 12.0	0.000264237
cg13318071	MESP2	46.98 ± 6.89	50.72 ± 6.22	0.000264778
cg19591003	FAM181A;C14orf86	56.98 ± 9.46	62.05 ± 9.21	0.000265197
cg07437360	Intergenic	75.75 ± 2.60	79.32 ± 2.38	0.000265436
cg00364281	Intergenic	67.51 ± 2.55	72.19 ± 1.65	0.000266405
cg02645408	PRKAR1B;PRKAR1B;PRKAR1B;PRKAR1B;PRKAR1B;PRKAR1B	75.56 ± 7.21	79.49 ± 6.50	0.000266738
cg12792180	HRNBP3	21.28 ± 10.8	25.13 ± 11.7	0.000266853
cg02178846	Intergenic	55.51 ± 4.89	57.74 ± 4.77	0.000267402
cg26881035	ZNF2;ZNF2;ZNF2;ZNF2	6.61 ± 0.83	5.56 ± 0.87	0.000267477
cg12083476	Intergenic	8.23 ± 0.86	10.03 ± 1.45	0.000267517
cg10611016	C11orf42	95.79 ± 0.92	97.28 ± 0.80	0.0002677
cg02240030	MAD1L1;MAD1L1;MAD1L1	95.72 ± 0.77	96.94 ± 0.52	0.000267887
cg01113896	PARD3	75.61 ± 5.35	81.56 ± 3.58	0.000268499
cg18755404	AGAP1;AGAP1	94.31 ± 1.22	95.76 ± 0.67	0.000269077
cg10578482	OPLAH	62.86 ± 3.83	65.89 ± 4.37	0.000271118
cg06244240	Intergenic	48.96 ± 4.64	52.27 ± 5.88	0.00027118
cg16329197	Intergenic	36.49 ± 13.6	42.78 ± 14.2	0.000271513
cg11432275	HTT	72.51 ± 6.19	76.81 ± 6.28	0.00027165
cg02513449	FGF19	39.44 ± 6.80	45.28 ± 7.72	0.000272828
cg02683350	ADAMTS2;ADAMTS2	83.50 ± 8.99	87.20 ± 6.54	0.00027307
cg19578113	Intergenic	49.07 ± 1.73	50.86 ± 1.73	0.000273566
cg00350642	VTCN1	46.58 ± 1.89	50.28 ± 2.09	0.000273616
cg06604249	ABAT;ABAT;ABAT;ABAT	18.08 ± 6.79	23.20 ± 7.97	0.000273823
cg13782937	ABLIM1;ABLIM1;ABLIM1	76.44 ± 6.44	81.13 ± 5.55	0.000274373
cg01623771	KLHL30	72.37 ± 5.54	76.32 ± 5.91	0.000275001
cg06377929	ATAD3B	7.45 ± 0.96	6.58 ± 0.85	0.000276296
cg00015121	THTPA;THTPA;THTPA	58.29 ± 4.11	60.85 ± 4.71	0.000276943
cg09274587	LEPREL2	7.10 ± 1.61	8.64 ± 2.33	0.000277103
cg18451156	CHFR;CHFR;CHFR;CHFR;CHFR	92.60 ± 1.28	93.65 ± 0.85	0.000277164
cg16057401	OR11A1	91.61 ± 1.79	89.57 ± 1.98	0.000277209
cg04256907	ZMIZ1	71.52 ± 3.69	76.54 ± 3.30	0.000277527
cg12389772	TRIM3;TRIM3	60.54 ± 7.33	65.06 ± 8.30	0.000278178
cg15357934	TSPAN31	22.34 ± 4.92	26.21 ± 3.44	0.000279783
cg09697578	FOXK2	84.26 ± 2.83	88.84 ± 2.35	0.000279819
cg00966380	Intergenic	94.36 ± 0.62	95.37 ± 0.60	0.000280453
cg11980819	TMIGD2;TMIGD2	64.63 ± 5.69	68.40 ± 5.41	0.000280462
cg08884363	STAC2	71.83 ± 3.17	74.27 ± 3.98	0.000281312
cg00087568	RAB11FIP3;RAB11FIP3	89.28 ± 2.39	91.43 ± 2.57	0.000281337
cg15497729	SCMH1;SCMH1	86.17 ± 2.79	89.13 ± 2.83	0.00028152
cg24507551	GTF2H4	68.17 ± 3.41	70.79 ± 3.23	0.000282761
cg06209924	Intergenic	73.70 ± 7.56	80.31 ± 6.99	0.000282796
cg15775549	Intergenic	53.17 ± 7.27	56.16 ± 7.51	0.000282936
cg14962007	Intergenic	51.74 ± 4.89	56.37 ± 4.85	0.00028344
cg06452875	DHX38	57.62 ± 4.04	61.60 ± 3.18	0.00028347
cg17222046	Intergenic	68.52 ± 4.16	73.11 ± 4.02	0.000283809
cg27493411	CUX1;CUX1;CUX1	75.19 ± 6.29	77.89 ± 5.25	0.00028491
cg00379983	UTP14A;UTP14A	81.18 ± 8.39	85.01 ± 7.52	0.000285122
cg14994737	C12orf49;RNFT2;RNFT2	6.29 ± 0.93	4.71 ± 0.73	0.000285688
cg21235108	USP20;USP20;USP20	62.58 ± 10.3	68.00 ± 9.83	0.000286689
cg18195498	GIGYF1	95.06 ± 0.72	95.94 ± 0.41	0.000286925
cg03071221	Intergenic	58.61 ± 8.06	62.40 ± 7.71	0.000287019
cg25656836	GLP2R	51.26 ± 2.16	53.25 ± 1.78	0.000287095
cg13458255	C8orf71	84.84 ± 3.74	87.10 ± 2.53	0.000287732
cg23668184	SOX11;SOX11	3.79 ± 2.31	3.04 ± 1.77	0.000288589
cg14341968	Intergenic	89.41 ± 2.62	90.81 ± 2.31	0.000288604
cg00146565	COL6A3;COL6A3;COL6A3;COL6A3;COL6A3	76.39 ± 4.02	79.89 ± 3.26	0.000288779
cg06799790	CSH2;CSH2;CSH2	46.89 ± 2.04	49.74 ± 2.53	0.000288807
cg09814633	Intergenic	56.42 ± 5.57	59.93 ± 5.05	0.000288863
cg19674878	Intergenic	55.05 ± 15.1	61.03 ± 14.8	0.000289165
cg02960150	FUS;FUS;FUS;FUS;FUS;FUS;FUS	3.17 ± 0.37	2.51 ± 0.39	0.0002893
cg02948884	PITX1	18.14 ± 1.69	16.71 ± 1.67	0.000289873
cg01087392	GBF1	7.37 ± 0.76	6.10 ± 0.61	0.000289926
cg06918955	C1GALT1C1;C1GALT1C1	65.11 ± 10.0	71.24 ± 9.55	0.000291132
cg09033638	AMMECR1L;AMMECR1L	16.58 ± 3.36	18.64 ± 3.64	0.000291513
cg01386493	ADRB3	36.61 ± 5.56	40.37 ± 4.53	0.000291606
cg10430077	Intergenic	36.20 ± 2.90	40.25 ± 2.42	0.000291694
cg00975912	Intergenic	82.05 ± 2.96	85.29 ± 2.09	0.000291727
cg18108049	PLEKHM2	67.81 ± 10.2	72.49 ± 9.37	0.000292282
cg26615794	Intergenic	70.14 ± 6.71	74.60 ± 6.11	0.000293046
cg03727700	NHLRC2;DCLRE1A	3.57 ± 0.57	4.51 ± 0.60	0.000293542
cg08219183	ARL2BP	73.47 ± 4.04	78.84 ± 2.57	0.000293701
cg08619515	CLEC16A	71.19 ± 4.45	73.27 ± 3.95	0.00029525
cg17953701	Intergenic	57.22 ± 8.69	61.51 ± 9.30	0.000295338
cg15515095	HS2ST1;HS2ST1	95.64 ± 0.57	96.80 ± 0.63	0.000295841
cg00873850	PDGFRA	5.09 ± 0.76	4.18 ± 0.34	0.000296449
cg12127863	Intergenic	69.51 ± 3.37	75.17 ± 3.14	0.000297591
cg02075454	ING1;ING1;ING1	5.10 ± 0.63	4.20 ± 0.39	0.000298087
cg01601639	Intergenic	73.73 ± 2.95	77.40 ± 3.20	0.0002985
cg10921077	Intergenic	81.39 ± 5.16	86.37 ± 4.46	0.00029889
cg06595162	NCRNA00114;NCRNA00114	75.79 ± 3.36	79.76 ± 2.59	0.000299143
cg18298815	FCGR3A;FCGR3A;FCGR3A;FCGR3A;FCGR3A	57.17 ± 4.12	60.43 ± 4.36	0.000299195
cg07644368	CDO1	21.91 ± 10.7	25.88 ± 10.6	0.000299281
cg08111284	TNXB	43.36 ± 3.03	45.23 ± 3.06	0.000299642
cg17385386	VARS;VARS	4.00 ± 0.41	3.32 ± 0.48	0.000300253
cg00928751	KCNJ2	96.31 ± 0.68	97.10 ± 0.60	0.000300757
cg03116035	Intergenic	91.49 ± 1.71	93.25 ± 1.31	0.000300992
cg01521143	TLE2	88.11 ± 1.33	90.07 ± 1.24	0.000301771
cg21629166	TMEM184A	94.65 ± 0.80	95.57 ± 0.80	0.000302046
cg21503826	HES1;HES1	2.40 ± 0.27	1.95 ± 0.24	0.000302168
cg15647481	MTMR9L	75.58 ± 3.70	78.69 ± 3.14	0.000302989
cg00877632	Intergenic	90.49 ± 2.53	92.58 ± 1.94	0.000303098
cg22207139	MYO1E	43.38 ± 10.2	50.03 ± 10.0	0.000303578
cg07363212	Intergenic	55.74 ± 6.68	61.16 ± 7.73	0.000303708
cg20194364	HSP90AB1	42.63 ± 7.28	48.18 ± 8.19	0.000304142
cg21182103	Intergenic	50.41 ± 4.38	53.71 ± 3.70	0.00030422
cg26386826	FAM107A;FAM107A	72.27 ± 2.54	76.28 ± 2.94	0.000305311
cg22855052	SPSB2;SPSB2	8.87 ± 1.46	7.41 ± 1.01	0.000305706
cg00826728	NRP1;NRP1;NRP1	2.86 ± 0.50	2.16 ± 0.38	0.000307052
cg00738345	CUEDC1	67.17 ± 8.88	71.60 ± 7.74	0.000307477
cg16176694	Intergenic	65.15 ± 7.75	70.11 ± 8.14	0.000307968
cg20893714	LOC100240734;FLJ12825	59.44 ± 4.19	64.25 ± 4.93	0.000307997
cg02460794	C21orf94	56.63 ± 4.66	59.04 ± 4.74	0.000308348
cg04472001	Intergenic	24.38 ± 2.77	28.16 ± 4.05	0.000308636
cg21942150	Intergenic	75.61 ± 2.57	81.24 ± 2.74	0.000309437
cg27325544	Intergenic	64.91 ± 3.34	68.72 ± 1.53	0.000310964
cg24078554	ZNF697	60.60 ± 5.40	65.55 ± 4.41	0.000311347
cg20461912	FOXL2;FOXL2	24.21 ± 4.08	26.83 ± 4.02	0.000312312
cg06772268	ATG10;ATG10	73.85 ± 3.11	78.67 ± 3.19	0.000313865
cg20847035	EPHA8;EPHA8	27.21 ± 8.10	31.98 ± 9.38	0.000313997
cg19800670	Intergenic	68.14 ± 5.60	70.55 ± 5.67	0.00031421
cg05030518	MAD1L1;MAD1L1;MAD1L1	97.00 ± 0.52	97.75 ± 0.43	0.000314724
cg21425003	TNK2;TNK2	95.08 ± 0.77	95.99 ± 0.48	0.000314914
cg22150440	PCDHA7;PCDHA13;PCDHA12;PCDHA6;PCDHA10;PCDHA4;PCDHA11;PCDHA8;PCDHA1;PCDHA2;PCDHA6;PCDHA1;PCDHA9;PCDHA13;PCDHA5;PCDHA3;PCDHA10	41.45 ± 4.55	44.19 ± 4.71	0.000315006
cg11970289	B3GNT4	15.31 ± 3.07	13.65 ± 2.87	0.000316616
cg14369455	ALPK1;ALPK1	47.05 ± 9.26	51.40 ± 9.54	0.000316752
cg25311466	WFS1;WFS1	62.25 ± 3.79	65.77 ± 4.68	0.000317106
cg24398472	Intergenic	91.35 ± 1.37	92.97 ± 1.00	0.000317605
cg23781276	KNDC1	64.22 ± 3.07	67.25 ± 2.50	0.000318118
cg03655142	JTB	38.57 ± 3.56	41.47 ± 3.55	0.000319108
cg09905973	CXCR1	56.74 ± 1.54	59.60 ± 1.85	0.00031917
cg01116956	Intergenic	60.65 ± 3.15	63.50 ± 3.10	0.000319587
cg06131939	C20orf135	79.16 ± 3.35	84.22 ± 1.66	0.000319662
cg23066675	IGSF11;IGSF11	59.43 ± 11.7	65.67 ± 12.9	0.000319857
cg10681992	TBC1D14;TBC1D14	75.90 ± 4.25	79.22 ± 3.92	0.00032002
cg06193043	NPPA	53.95 ± 6.18	57.16 ± 6.83	0.000320863
cg12568633	CDH23;C10orf54	9.81 ± 1.09	8.96 ± 1.21	0.000321075
cg00465941	PRPF40B	2.96 ± 0.63	2.39 ± 0.41	0.000321963
cg02693249	ELK4;ELK4	4.71 ± 0.50	4.22 ± 0.37	0.000322159
cg11469308	Intergenic	55.32 ± 8.05	60.06 ± 7.44	0.000322162
cg20134295	Intergenic	71.19 ± 5.13	75.13 ± 4.29	0.000322957
cg20068156	NOS3	88.19 ± 2.71	91.58 ± 0.99	0.000323134
cg08710841	Intergenic	50.68 ± 6.71	53.09 ± 6.14	0.000323599
cg06131338	ACACB	96.54 ± 0.65	97.42 ± 0.51	0.000323634
cg09418321	DYRK4	64.14 ± 2.18	66.49 ± 2.94	0.000323792
cg02798848	Intergenic	55.25 ± 5.77	57.34 ± 6.13	0.000323827
cg06136125	Intergenic	67.76 ± 3.31	71.49 ± 3.87	0.000324396
cg24576225	LOC100190939;TPT1	10.48 ± 1.87	12.18 ± 2.46	0.000324716
cg21555271	Intergenic	80.58 ± 4.49	83.04 ± 3.56	0.000324986
cg14876906	SSB	89.56 ± 1.57	91.71 ± 1.68	0.000325218
cg09714789	ATP11A;ATP11A	89.05 ± 1.73	91.16 ± 1.06	0.000325553
cg03587925	Intergenic	95.60 ± 0.88	96.56 ± 0.38	0.00032641
cg04107005	C13orf28	78.76 ± 2.80	81.19 ± 2.86	0.000326523
cg23618179	Intergenic	60.39 ± 1.71	62.35 ± 1.84	0.000327378
cg08356738	PRICKLE2	81.56 ± 6.84	87.63 ± 6.44	0.000327685
cg07009334	Intergenic	92.89 ± 1.06	93.79 ± 1.19	0.000328262
cg08102619	TIAL1;TIAL1	3.91 ± 0.54	3.45 ± 0.42	0.000328501
cg06832449	PARD3	41.05 ± 6.30	45.89 ± 7.27	0.000328931
cg20811456	Intergenic	33.69 ± 4.44	36.96 ± 4.10	0.000330607
cg13361747	ZBTB16;ZBTB16	96.73 ± 0.78	97.82 ± 0.59	0.000331781
cg03112033	Intergenic	74.39 ± 5.25	78.60 ± 3.89	0.000332705
cg24360773	NR1D2;NR1D2	4.47 ± 0.48	3.58 ± 0.54	0.000333739
cg15120732	KCNQ5;KCNQ5;KCNQ5;KCNQ5;KCNQ5	6.76 ± 2.14	8.36 ± 2.67	0.000334912
cg15171226	ARHGEF18	81.79 ± 6.81	87.19 ± 5.13	0.000335144
cg22790870	TMEM132C	76.81 ± 3.81	81.77 ± 4.10	0.000335209
cg12845975	C3orf14	24.32 ± 3.75	26.00 ± 3.99	0.000335642
cg10914115	CLIC1	49.66 ± 2.77	53.15 ± 3.09	0.000335765
cg02737619	SKI	64.11 ± 4.71	68.59 ± 4.97	0.000336241
cg04305672	TXNDC12	91.82 ± 1.54	93.98 ± 1.16	0.000337004
cg05714673	SDK1;SDK1	91.09 ± 1.20	92.58 ± 1.32	0.000337351
cg00694324	SPATA21	88.57 ± 1.39	90.25 ± 0.96	0.000337669
cg06413272	Intergenic	75.88 ± 4.81	80.03 ± 3.70	0.0003378
cg08152926	ACTN1;ACTN1;ACTN1	6.39 ± 1.03	5.20 ± 0.79	0.000337952
cg14631997	APBA1	71.98 ± 10.1	78.53 ± 8.80	0.00033837
cg03510117	CYCS	3.40 ± 0.43	3.92 ± 0.51	0.0003384
cg00821604	FARP1	86.46 ± 3.06	89.22 ± 2.47	0.000338435
cg05275468	KAT2B	3.00 ± 0.23	2.58 ± 0.41	0.000339032
cg06507377	PATL1	5.34 ± 1.07	4.15 ± 0.82	0.000339765
cg18327049	CDC42BPB	87.52 ± 4.58	85.25 ± 5.13	0.000339884
cg23927687	NGEF;NGEF	56.72 ± 7.87	61.29 ± 9.32	0.000340537
cg02058624	Intergenic	14.36 ± 2.66	16.03 ± 2.34	0.000340618
cg09662034	TFAP2C	19.14 ± 6.52	25.22 ± 7.18	0.000341039
cg20452961	Intergenic	65.70 ± 2.52	67.90 ± 2.52	0.000341133
cg05230389	Intergenic	93.54 ± 1.52	94.30 ± 1.35	0.000341368
cg22470218	YIPF3;POLR1C;POLR1C	3.21 ± 0.52	4.08 ± 0.54	0.000341768
cg25440893	Intergenic	21.31 ± 7.51	24.22 ± 8.86	0.000341804
cg26919657	Intergenic	90.81 ± 2.64	93.40 ± 1.50	0.00034354
cg12760887	MIR429	58.58 ± 5.18	62.42 ± 7.19	0.000343692
cg17958516	ZMIZ1	47.16 ± 7.76	51.34 ± 8.75	0.000344045
cg08420085	ZDHHC24;ACTN3;ZDHHC24	3.01 ± 0.46	2.40 ± 0.30	0.000344713
cg12444861	PLAGL1;PLAGL1	27.15 ± 7.41	32.09 ± 8.88	0.000344835
cg26408888	CARKD	70.07 ± 3.40	73.32 ± 2.34	0.000345181
cg03055440	MS4A6A;MS4A6A;MS4A6A	87.73 ± 3.84	90.56 ± 3.71	0.000345251
cg27109741	GRID2IP	57.98 ± 3.61	60.77 ± 2.64	0.000346468
cg14569644	Intergenic	26.07 ± 8.04	29.09 ± 8.38	0.000346651
cg15073264	CLCN5;CLCN5;MIR660	87.14 ± 4.38	89.46 ± 3.28	0.000346831
cg04396314	SCYL1;SCYL1	7.19 ± 0.77	5.80 ± 0.58	0.000347358
cg21578640	HCN2	8.49 ± 0.56	7.64 ± 0.62	0.00034767
cg17950186	MICA	74.67 ± 5.60	80.65 ± 3.21	0.000347693
cg18730873	RORA	92.41 ± 1.43	94.29 ± 1.18	0.000347886
cg15346493	Intergenic	66.46 ± 8.30	71.46 ± 6.76	0.000348297
cg27625401	Intergenic	64.42 ± 8.52	67.91 ± 8.42	0.00034938
cg05933037	PKD1L2;PKD1L2	65.56 ± 6.10	68.21 ± 5.31	0.00034967
cg06325346	VN1R2	39.50 ± 2.52	42.12 ± 3.26	0.000350631
cg06619959	IL17RE;IL17RE;IL17RE	45.31 ± 2.66	47.58 ± 3.33	0.000350686
cg20513418	Intergenic	71.40 ± 9.19	77.47 ± 10.0	0.000350701
cg20414838	MAGOH;MAGOH	5.72 ± 0.98	4.96 ± 0.72	0.000351796
cg13327407	CLIP2;CLIP2	60.74 ± 2.75	64.36 ± 3.23	0.000352581
cg04580170	Intergenic	74.16 ± 8.72	80.44 ± 7.03	0.000352693
cg15084467	EXO1;EXO1;EXO1	8.05 ± 1.56	9.23 ± 1.85	0.000352733
cg03033780	WRB	58.47 ± 4.31	64.47 ± 2.57	0.000353009
cg05152067	Intergenic	63.43 ± 2.48	67.00 ± 1.50	0.000353088
cg23142394	LOC283392;TRHDE;LOC283392	6.41 ± 1.04	5.46 ± 1.19	0.000354435
cg24828151	Intergenic	26.88 ± 12.3	30.88 ± 12.8	0.000354868
cg21943938	KIF7	6.17 ± 0.91	7.52 ± 1.18	0.000354896
cg02167456	AFF2;AFF2;AFF2;AFF2;AFF2;AFF2	74.36 ± 10.0	79.49 ± 9.18	0.000354909
cg01092770	ZMAT3;ZMAT3	3.84 ± 0.52	3.40 ± 0.43	0.000354916
cg02550119	LIG3;LIG3	70.31 ± 3.92	73.67 ± 2.85	0.000355411
cg22987614	ODZ4	95.49 ± 0.59	96.36 ± 0.47	0.000355574
cg13386217	MYOM2	69.98 ± 4.04	73.49 ± 4.17	0.000355659
cg07806797	ZNF185	59.19 ± 3.08	63.01 ± 3.63	0.000355752
cg03168026	PROS1	8.24 ± 0.91	7.28 ± 0.85	0.000355964
cg21731375	Intergenic	34.85 ± 7.26	37.92 ± 7.32	0.000356289
cg21909660	BTK	14.81 ± 4.72	17.60 ± 5.81	0.000356595
cg12050949	KLHL13;KLHL13;KLHL13	89.76 ± 3.17	92.76 ± 1.33	0.000357352
cg24758173	SUFU;ACTR1A	6.86 ± 0.78	5.44 ± 0.68	0.000357907
cg25579204	Intergenic	92.92 ± 1.69	93.92 ± 1.16	0.000358268
cg14954836	SPPL2B;SPPL2B	83.17 ± 1.37	85.79 ± 1.47	0.000358321
cg07228241	CHD7	55.73 ± 4.48	58.71 ± 3.83	0.000358523
cg03562441	ARNTL;ARNTL;ARNTL	94.81 ± 1.44	96.53 ± 0.98	0.000359221
cg10356187	Intergenic	29.40 ± 2.28	31.76 ± 2.86	0.000360031
cg25431366	UBE2F	53.23 ± 3.69	57.38 ± 4.01	0.000360234
cg01438537	Intergenic	64.80 ± 2.77	68.93 ± 3.32	0.000360254
cg10816323	PPP2R5C;PPP2R5C	93.45 ± 0.95	94.82 ± 0.64	0.000360264
cg23642826	ZBTB48	61.02 ± 7.27	65.90 ± 6.88	0.000360749
cg05350224	AES;AES;AES	43.74 ± 5.29	48.03 ± 6.16	0.000360931
cg13202415	HSPA1L	62.40 ± 3.50	66.44 ± 1.88	0.000361128
cg23084319	ABLIM2;ABLIM2;ABLIM2;ABLIM2;ABLIM2;ABLIM2;ABLIM2	83.56 ± 2.33	87.46 ± 1.82	0.000361426
cg10088622	Intergenic	94.15 ± 0.68	95.30 ± 0.80	0.000362038
cg01559901	ZNF709	49.62 ± 2.99	52.69 ± 3.52	0.000362925
cg01923482	HAVCR1;HAVCR1	76.14 ± 2.44	78.40 ± 1.95	0.000363099
cg01382649	EHD4	3.76 ± 0.62	3.04 ± 0.52	0.000363755
cg18877660	ZFP36L2;LOC100129726	4.92 ± 0.74	4.02 ± 0.39	0.000365051
cg09918077	Intergenic	30.78 ± 16.3	37.11 ± 18.3	0.000365411
cg09512236	KCNMA1;KCNMA1;KCNMA1;KCNMA1	10.62 ± 2.80	12.60 ± 2.90	0.000365425
cg10030843	Intergenic	34.96 ± 4.61	37.92 ± 4.52	0.000365565
cg04124690	WDFY3;WDFY3	92.23 ± 1.49	94.01 ± 1.10	0.000368206
cg24156393	Intergenic	73.83 ± 3.23	77.57 ± 4.14	0.00036831
cg15803972	MYO3B;MYO3B;MYO3B	51.91 ± 5.58	58.43 ± 6.42	0.000368642
cg26686512	HDAC4	73.31 ± 2.86	77.22 ± 2.64	0.000368822
cg14831745	PLEKHA6	49.43 ± 1.64	52.66 ± 1.38	0.000369034
cg04043892	PXN;PXN;PXN	88.23 ± 1.62	90.21 ± 1.08	0.000369343
cg20740028	CREB5	4.46 ± 0.49	3.58 ± 0.76	0.000369443
cg16907101	Intergenic	48.15 ± 3.93	51.67 ± 5.16	0.00036973
cg02384251	CTBP1;CTBP1	49.38 ± 5.78	53.00 ± 5.21	0.000370068
cg18669966	Intergenic	13.48 ± 1.12	15.47 ± 1.38	0.000370593
cg21167046	MAEA;MAEA	44.18 ± 8.24	48.15 ± 8.81	0.000371147
cg05261592	Intergenic	76.81 ± 2.08	79.33 ± 2.00	0.000371809
cg07220897	Intergenic	90.50 ± 1.65	93.16 ± 1.09	0.000372134
cg12178904	SLC45A3	70.85 ± 5.84	76.19 ± 6.16	0.000372252
cg04601957	Intergenic	43.95 ± 3.69	46.66 ± 3.46	0.000372279
cg05734675	DIP2C	15.93 ± 10.2	19.00 ± 11.0	0.000373602
cg25196508	ADCY6	59.64 ± 12.2	53.53 ± 12.1	0.000374816
cg11502673	Intergenic	68.62 ± 3.55	71.68 ± 3.86	0.000374839
cg07837433	KLK6;KLK6;KLK6	42.16 ± 2.71	44.89 ± 2.70	0.000375001
cg05447955	GAB2	87.93 ± 4.65	92.63 ± 3.22	0.000375378
cg22387890	USP42	9.27 ± 1.86	7.38 ± 1.14	0.000375398
cg18591013	CTDP1;CTDP1	89.30 ± 1.45	91.17 ± 1.51	0.000375772
cg06528575	FAIM3;FAIM3;FAIM3	8.52 ± 1.11	7.11 ± 0.63	0.000375864
cg27160920	TEKT5	63.10 ± 3.14	67.95 ± 2.80	0.000375876
cg25445101	UNC119;UNC119	75.85 ± 4.69	78.97 ± 4.21	0.00037634
cg15094788	POU2F3	86.46 ± 3.34	89.40 ± 1.33	0.00037681
cg01791648	SENP7;SENP7	58.83 ± 6.98	62.68 ± 6.97	0.000377155
cg23879435	STON2	90.19 ± 1.09	91.86 ± 0.70	0.000377361
cg13099829	SKI	91.63 ± 1.17	93.24 ± 0.71	0.000377867
cg03464560	CXCR2;CXCR2	81.65 ± 2.42	84.50 ± 2.31	0.000378263
cg02238362	PRDM15	67.80 ± 3.73	71.12 ± 3.91	0.000378799
cg04824401	C1QTNF4	86.85 ± 1.62	89.03 ± 1.27	0.000379224
cg14571130	APCDD1L	97.13 ± 0.36	97.68 ± 0.40	0.000380066
cg17097293	PIP5K1C	75.38 ± 4.51	81.38 ± 4.24	0.000380067
cg12869688	C15orf42	86.53 ± 1.79	88.92 ± 1.79	0.000380307
cg06781213	Intergenic	67.66 ± 2.84	71.08 ± 3.04	0.000380367
cg05573844	Intergenic	20.57 ± 4.12	23.95 ± 4.12	0.000381475
cg00273340	CCDC88B	89.09 ± 1.65	90.58 ± 1.13	0.000381507
cg00631837	PHF21B;PHF21B	12.03 ± 1.18	10.34 ± 1.16	0.000382239
cg26894354	FMOD	38.98 ± 4.71	41.54 ± 4.66	0.000382356
cg02400735	Intergenic	34.49 ± 7.29	39.69 ± 8.24	0.00038297
cg10287545	TBC1D24	75.24 ± 4.29	79.04 ± 4.88	0.000383238
cg18826267	RANBP3;RANBP3;RANBP3	3.13 ± 0.45	2.54 ± 0.24	0.000385044
cg13956452	ENTPD8;ENTPD8	65.31 ± 4.40	68.20 ± 4.02	0.000385104
cg08039952	LOC146336	51.47 ± 3.48	55.13 ± 3.59	0.000386981
cg06069685	C18orf20	68.07 ± 3.82	72.12 ± 2.54	0.000387505
cg07178896	PAPD5;PAPD5	80.30 ± 4.88	84.55 ± 3.96	0.000387806
cg14925091	MCF2L;MCF2L	73.97 ± 2.83	77.49 ± 2.05	0.000388695
cg00948102	ICT1	2.07 ± 0.25	1.74 ± 0.21	0.000389021
cg19907796	VAX2	42.90 ± 7.34	46.52 ± 7.29	0.0003892
cg06926314	ANKRD33B	35.50 ± 8.23	39.29 ± 8.43	0.000390119
cg13501950	SCMH1;SCMH1	56.31 ± 4.95	58.83 ± 4.51	0.000390458
cg00354884	ABR;ABR	41.40 ± 4.63	44.76 ± 5.98	0.000391087
cg05922723	GIGYF1	62.54 ± 4.34	66.01 ± 4.83	0.000391188
cg22493358	ZNF862	92.75 ± 0.72	93.76 ± 1.06	0.00039132
cg02727104	Intergenic	15.74 ± 4.14	17.43 ± 4.52	0.000391326
cg23171099	MAMSTR;MAMSTR	7.29 ± 1.28	9.08 ± 2.00	0.0003914
cg08498539	Intergenic	61.57 ± 5.43	64.20 ± 6.05	0.000391749
cg23123731	Intergenic	84.49 ± 6.74	87.43 ± 5.16	0.000393084
cg23959976	NUMBL	57.92 ± 4.30	62.35 ± 4.33	0.000394444
cg17530031	ING5	67.30 ± 3.74	70.58 ± 3.87	0.000394711
cg08491733	ERCC3	4.52 ± 0.63	3.60 ± 0.29	0.000394854
cg01898964	Intergenic	34.45 ± 4.09	37.69 ± 5.22	0.000395219
cg19786805	LRRK1	79.09 ± 5.13	82.24 ± 4.03	0.000395319
cg00799353	RFC4;RFC4;RFC4	3.04 ± 0.37	2.51 ± 0.38	0.000395572
cg21210224	Intergenic	7.03 ± 3.48	8.75 ± 3.86	0.000396048
cg20516364	CHID1;CHID1;CHID1;CHID1;CHID1	74.22 ± 2.97	78.32 ± 3.11	0.000396562
cg12085852	ACTR10	10.53 ± 1.39	13.05 ± 1.95	0.000396655
cg04285652	Intergenic	30.58 ± 1.48	33.96 ± 2.36	0.000397771
cg06421751	MYOM2	86.08 ± 2.81	89.00 ± 2.63	0.000398314
cg05729490	Intergenic	64.06 ± 3.54	66.97 ± 2.57	0.000398577
cg06438881	NELF;NELF;NELF;NELF	60.30 ± 3.33	63.82 ± 3.07	0.000398763
cg10677933	CABIN1	78.41 ± 3.23	81.70 ± 2.77	0.000399285
cg05498379	WAC;WAC;WAC	31.44 ± 1.84	29.23 ± 2.49	0.00039951
cg06123252	KIAA1751	65.22 ± 3.15	67.51 ± 3.69	0.000399738
cg12428422	Intergenic	94.85 ± 1.08	95.86 ± 0.53	0.000399758
cg25494665	DGKH;DGKH	5.20 ± 0.55	4.38 ± 0.65	0.000400462
cg17952446	WISP3;WISP3	76.53 ± 2.43	78.57 ± 1.54	0.000400636
cg26226702	PACS2;PACS2	67.23 ± 4.57	71.06 ± 5.64	0.000400652
cg11643510	Intergenic	73.93 ± 4.31	77.18 ± 4.08	0.000401458
cg04057956	CD9	38.37 ± 6.58	42.64 ± 6.15	0.000401929
cg19850931	FHL2;FHL2;FHL2;FHL2	51.00 ± 10.0	57.01 ± 9.70	0.000402461
cg11840984	PRR23C	80.83 ± 6.25	84.75 ± 4.33	0.000402663
cg22598841	LRIG2	5.74 ± 1.04	6.77 ± 0.75	0.000402668
cg19631576	CCDC105	62.67 ± 4.94	65.91 ± 4.93	0.00040267
cg02129382	TOP1P1;FMO4	73.10 ± 5.62	77.66 ± 5.35	0.000402739
cg19817367	C15orf39	89.41 ± 3.78	91.56 ± 2.67	0.000403079
cg00429830	DUSP11	9.99 ± 1.34	11.99 ± 1.88	0.000403549
cg17613550	ZNF509	76.36 ± 5.43	79.23 ± 4.80	0.000404578
cg14276584	CDC14B;CDC14B;CDC14B	54.57 ± 11.5	60.70 ± 12.7	0.000404873
cg02660480	KIAA1217;KIAA1217;KIAA1217	92.60 ± 1.73	93.77 ± 1.22	0.000405063
cg19719475	UBE2E1;UBE2E1	76.25 ± 5.15	81.18 ± 4.65	0.000405257
cg20240757	PTH	84.90 ± 2.52	87.37 ± 2.21	0.000405732
cg24523456	HLCS	96.24 ± 0.56	97.19 ± 0.64	0.000406065
cg21617357	HTATIP2;HTATIP2;HTATIP2;HTATIP2;HTATIP2	83.37 ± 4.42	86.61 ± 3.30	0.000406493
cg06891491	ZNF75D	46.37 ± 12.8	51.82 ± 13.9	0.000406934
cg15899800	GFPT1	79.22 ± 5.92	85.90 ± 4.72	0.000407025
cg00035268	C6orf124	96.12 ± 0.99	97.36 ± 0.81	0.000407243
cg25253207	Intergenic	85.86 ± 4.03	89.95 ± 3.09	0.000407302
cg26656387	KLF12	89.77 ± 3.06	91.79 ± 2.29	0.000408786
cg13776718	FAM69B	82.97 ± 2.87	86.85 ± 1.63	0.000410111
cg25602765	VTRNA1-1	8.63 ± 3.12	11.14 ± 3.15	0.000410587
cg22959667	SH3RF3;LOC100287216	3.71 ± 0.59	2.95 ± 0.37	0.000410869
cg13837916	GUSBL1	65.98 ± 10.6	72.19 ± 11.1	0.000410887
cg24768910	RASA3	95.81 ± 1.25	96.57 ± 0.94	0.000411578
cg27597473	NOTCH4	63.25 ± 2.04	66.07 ± 2.05	0.000411806
cg13226924	SGSM2;SGSM2	96.08 ± 0.99	97.06 ± 1.01	0.000413055
cg02981752	BTBD12	75.13 ± 2.30	76.99 ± 2.37	0.000413838
cg15599409	GAK	84.61 ± 3.21	88.55 ± 1.93	0.000414386
cg15967169	TRIM26	69.75 ± 3.57	74.48 ± 2.87	0.00041447
cg23479988	ABCB1	80.47 ± 8.63	85.82 ± 7.10	0.000415095
cg14494620	Intergenic	42.21 ± 5.89	45.26 ± 6.46	0.000415438
cg04292104	AJAP1;AJAP1	44.71 ± 4.56	48.04 ± 4.67	0.000416044
cg25174409	PCP4	12.59 ± 4.71	16.13 ± 6.55	0.000416429
cg27370461	PPP2R1B;PPP2R1B	6.51 ± 0.72	5.55 ± 0.52	0.00041652
cg15293629	ZAK;ZAK	59.78 ± 10.2	65.62 ± 9.28	0.000416668
cg06700275	C1QTNF1;C1QTNF1;C1QTNF1	42.65 ± 4.39	45.98 ± 4.67	0.000416692
cg25900631	Intergenic	65.91 ± 7.15	68.66 ± 8.50	0.000417272
cg01236573	Intergenic	50.83 ± 5.45	55.51 ± 6.83	0.000417524
cg23989053	KISS1R;KISS1R	7.27 ± 2.01	5.63 ± 1.31	0.000418081
cg12597169	CCDC140	12.85 ± 1.06	14.58 ± 1.12	0.000418745
cg08241307	Intergenic	25.47 ± 6.08	28.26 ± 7.31	0.000419918
cg04194840	NDRG4;NDRG4;NDRG4	62.20 ± 5.68	64.77 ± 5.95	0.000420066
cg14601891	Intergenic	85.62 ± 3.01	89.59 ± 1.70	0.00042049
cg05705605	Intergenic	56.17 ± 6.81	59.15 ± 6.56	0.000420714
cg04526616	FOXK1	62.52 ± 8.65	66.28 ± 7.86	0.000421136
cg11888747	TADA3	78.73 ± 2.89	81.28 ± 2.53	0.000421875
cg18192906	NOTCH4	63.45 ± 4.07	66.81 ± 2.35	0.000422342
cg00247535	Intergenic	71.35 ± 2.84	74.98 ± 2.07	0.000422677
cg25280589	IGBP1	47.40 ± 4.96	50.13 ± 4.46	0.000423771
cg12256233	Intergenic	83.80 ± 3.57	87.42 ± 2.62	0.000425104
cg22801675	Intergenic	8.50 ± 1.35	6.88 ± 1.54	0.000425105
cg15681853	Intergenic	63.79 ± 9.23	68.72 ± 9.12	0.000425323
cg03747345	FCGBP	87.17 ± 2.66	89.05 ± 2.64	0.00042614
cg06748146	HK1;HK1;HK1;HK1;HK1	73.65 ± 3.59	76.88 ± 3.55	0.000427283
cg21689824	SLC2A5	54.85 ± 2.74	59.00 ± 2.95	0.000428021
cg16032408	SLC6A6;SLC6A6;SLC6A6	53.42 ± 4.00	57.37 ± 4.73	0.000428087
cg03243787	Intergenic	68.60 ± 4.00	71.36 ± 3.64	0.000428644
cg21738441	ZNF28	87.51 ± 3.64	90.27 ± 3.13	0.000428807
cg00771185	MED14	65.02 ± 5.52	70.19 ± 5.84	0.000429079
cg01968728	Intergenic	86.63 ± 2.82	89.29 ± 2.30	0.000429176
cg05141341	ZMIZ2;ZMIZ2	78.50 ± 5.12	81.95 ± 4.36	0.00042922
cg03170013	C2orf85	79.46 ± 3.29	82.71 ± 3.38	0.000429403
cg18593654	UBXN6;UBXN6	93.03 ± 1.74	94.85 ± 0.93	0.000430104
cg11608424	HEPACAM2;HEPACAM2	80.04 ± 3.78	83.84 ± 3.37	0.000430486
cg19954602	FILIP1	20.83 ± 6.97	26.53 ± 7.69	0.000430801
cg19011844	GAS7	4.54 ± 1.27	6.01 ± 1.54	0.000431081
cg13808083	BARX1	34.56 ± 3.31	37.26 ± 3.26	0.00043112
cg18280909	Intergenic	44.35 ± 5.09	47.02 ± 5.43	0.000431318
cg02779016	MAP1A	13.78 ± 5.86	16.50 ± 6.65	0.000431321
cg11644627	INTS1	62.63 ± 3.62	65.99 ± 3.23	0.000431651
cg18771839	ANO1;ANO1	87.87 ± 4.90	90.36 ± 3.72	0.000431907
cg09789768	TBX15	37.59 ± 7.89	41.37 ± 8.83	0.000432979
cg02496065	Intergenic	65.18 ± 3.57	69.67 ± 2.22	0.000433015
cg12621141	NOX1;NOX1	69.28 ± 4.62	73.96 ± 3.39	0.000433597
cg01832665	Intergenic	66.11 ± 12.2	70.41 ± 13.2	0.000433599
cg04792863	Intergenic	10.88 ± 2.45	9.71 ± 2.13	0.000433923
cg01666573	FAM9A;FAM9A	83.71 ± 3.61	85.78 ± 2.96	0.000434419
cg16200531	Intergenic	51.84 ± 10.2	57.94 ± 9.71	0.000434969
cg05976228	TET3	88.87 ± 1.29	90.68 ± 1.46	0.000435905
cg18593660	NAV2	34.31 ± 4.24	40.39 ± 2.67	0.000436489
cg01797216	PDCL3	92.00 ± 1.14	93.84 ± 1.11	0.00043654
cg11237573	KPNA6	6.53 ± 1.26	7.54 ± 1.71	0.000436904
cg04497354	TRIM40	76.76 ± 4.32	78.94 ± 3.95	0.000437695
cg00554260	Intergenic	83.31 ± 3.45	87.26 ± 2.26	0.000438301
cg23163917	Intergenic	94.71 ± 1.37	96.14 ± 1.48	0.000438361
cg01214050	Intergenic	82.17 ± 3.57	87.11 ± 3.73	0.000439418
cg02927747	PHLPP1	89.72 ± 4.50	93.41 ± 2.69	0.000439681
cg27077106	CIAPIN1;COQ9	5.32 ± 0.93	4.60 ± 0.67	0.000439742
cg13918518	C17orf82	21.20 ± 6.71	23.92 ± 6.84	0.000439907
cg00703898	Intergenic	52.18 ± 3.76	55.13 ± 3.01	0.000440109
cg12429629	Intergenic	75.02 ± 4.27	78.58 ± 3.70	0.000440326
cg10082841	PIP5KL1;PIP5KL1	44.28 ± 4.66	47.94 ± 5.43	0.000440736
cg09838287	Intergenic	3.90 ± 0.74	5.18 ± 1.04	0.000441518
cg06233376	A2BP1;A2BP1	21.76 ± 3.91	24.77 ± 4.48	0.000441737
cg10573521	HNF1A	70.57 ± 6.29	74.27 ± 6.49	0.00044208
cg25709335	CARKD	57.02 ± 11.3	61.96 ± 11.5	0.000442607
cg08611833	PSMB1;TBP	7.66 ± 0.89	6.45 ± 0.53	0.000443379
cg17973661	MAP2K5;MAP2K5	43.52 ± 2.90	46.07 ± 3.78	0.00044344
cg19435526	LRRC8E	47.09 ± 3.39	51.40 ± 4.35	0.00044378
cg24541378	Intergenic	73.87 ± 3.41	76.40 ± 2.66	0.000444388
cg03135964	GALNT9	73.37 ± 3.98	78.02 ± 2.96	0.000444744
cg10552698	PDHB	7.71 ± 1.72	9.45 ± 2.03	0.000445096
cg23874145	CUX1;CUX1;CUX1	97.25 ± 0.54	97.80 ± 0.57	0.0004452
cg14127641	EVPL	69.54 ± 2.47	71.71 ± 2.53	0.000445442
cg07220821	NOTCH1	63.89 ± 6.49	67.90 ± 7.32	0.000445615
cg26177968	ZDHHC16;ZDHHC16;ZDHHC16;ZDHHC16;ZDHHC16	78.59 ± 4.33	80.34 ± 4.32	0.000445811
cg01766077	ARL15	95.83 ± 0.73	97.32 ± 0.80	0.000445977
cg14467066	BAHCC1	87.04 ± 2.51	89.46 ± 2.20	0.000446017
cg10500579	ATXN3;ATXN3;ATXN3;ATXN3;ATXN3;ATXN3;ATXN3;ATXN3;ATXN3;ATXN3;ATXN3;ATXN3;ATXN3;ATXN3;ATXN3;ATXN3;ATXN3;ATXN3;ATXN3;ATXN3;ATXN3;ATXN3;ATXN3;ATXN3;ATXN3;ATXN3;ATXN3;ATXN3;ATXN3;ATXN3;ATXN3;ATXN3	3.47 ± 0.34	2.92 ± 0.42	0.000446626
cg22345349	Intergenic	51.02 ± 3.48	55.18 ± 1.79	0.000446636
cg20665007	ILF3;ILF3;ILF3;ILF3;ILF3	53.74 ± 4.16	56.56 ± 4.60	0.000447022
cg07061692	SLC27A5	3.90 ± 0.53	3.21 ± 0.26	0.000447277
cg14579546	COL27A1	17.07 ± 5.59	20.55 ± 6.13	0.000447439
cg26732804	HHEX	5.78 ± 0.68	4.82 ± 0.76	0.000447861
cg21244038	RASGRP3;RASGRP3;RASGRP3	59.27 ± 11.2	66.38 ± 9.47	0.000448057
cg25526039	SOBP	44.60 ± 10.5	50.55 ± 11.1	0.000448107
cg15716210	Intergenic	59.29 ± 6.13	62.20 ± 6.90	0.000448319
cg23999318	HIPK2;HIPK2	55.80 ± 9.27	61.55 ± 8.02	0.000449251
cg20863409	FKBP1B;FKBP1B	5.73 ± 0.85	4.67 ± 0.48	0.000450125
cg14694038	KDM4B	56.27 ± 11.1	61.17 ± 10.7	0.000450596
cg12476760	Intergenic	90.75 ± 2.40	92.20 ± 1.66	0.000450646
cg03969182	C6orf134	74.86 ± 3.26	77.71 ± 2.33	0.000451128
cg04524652	FAM160A1	3.74 ± 0.42	3.28 ± 0.26	0.000452394
cg01635878	NMU	10.17 ± 1.13	11.72 ± 1.47	0.00045337
cg25231471	FAM82B	3.40 ± 0.50	3.90 ± 0.67	0.000453947
cg20803796	Intergenic	29.04 ± 10.8	31.84 ± 11.1	0.000454056
cg15119221	MFAP4	48.15 ± 9.95	52.35 ± 8.74	0.000454666
cg26159990	ERI3	53.27 ± 9.00	57.02 ± 9.86	0.000455072
cg18428234	Intergenic	53.06 ± 4.91	57.06 ± 6.31	0.00045561
cg07778983	ZNF582	48.98 ± 5.69	52.10 ± 5.20	0.000456306
cg12051116	CLASP1;CLASP1;CLASP1	66.95 ± 5.76	71.28 ± 6.71	0.000456669
cg15862271	TPST2;TPST2	97.19 ± 0.49	97.74 ± 0.36	0.00045807
cg01835725	PCBP4	23.31 ± 2.34	25.98 ± 2.76	0.000458154
cg13123009	LY6G6E;LY6G6D;LY6G6E	36.85 ± 2.89	40.19 ± 3.10	0.000459341
cg13602065	Intergenic	85.89 ± 1.64	88.33 ± 1.60	0.000459384
cg25230043	ERICH1	97.50 ± 0.43	98.07 ± 0.37	0.000459443
cg12108029	SQLE;SQLE	7.55 ± 1.29	5.69 ± 0.77	0.000459528
cg21622464	DYNLL2	72.09 ± 5.37	75.35 ± 6.29	0.000459575
cg22454053	Intergenic	90.39 ± 2.24	93.14 ± 1.00	0.000459667
cg12454169	LCLAT1;LCLAT1	20.82 ± 20.1	23.09 ± 20.6	0.000459905
cg20672708	TM9SF4	63.24 ± 5.82	66.83 ± 5.44	0.00046142
cg16436164	Intergenic	39.65 ± 2.97	42.34 ± 3.25	0.00046144
cg01564135	EVX1	34.98 ± 8.34	40.89 ± 9.15	0.000461567
cg11208229	INS;INS-IGF2;INS-IGF2	66.66 ± 9.23	70.21 ± 9.60	0.000461846
cg16102024	Intergenic	52.84 ± 2.64	55.40 ± 3.11	0.000461941
cg00959922	FOXL1	45.42 ± 4.45	50.51 ± 4.40	0.000462474
cg05032348	NUMA1	70.95 ± 2.89	73.33 ± 3.70	0.000463484
cg00636527	GRK6;GRK6;GRK6	75.12 ± 5.29	78.61 ± 5.66	0.00046375
cg17876277	CXorf15;CXorf15	48.44 ± 5.91	51.40 ± 5.35	0.000463914
cg11071762	Intergenic	2.46 ± 0.24	1.98 ± 0.29	0.00046456
cg03935731	ZSCAN10	71.46 ± 6.25	75.44 ± 6.58	0.000464639
cg07761273	EGFL6;EGFL6	60.88 ± 8.16	68.71 ± 4.56	0.000464741
cg27016776	Intergenic	54.16 ± 6.31	58.72 ± 5.06	0.000464851
cg08822578	LATS2	54.54 ± 3.98	59.50 ± 4.62	0.000464955
cg05161682	COL4A2	60.99 ± 3.86	64.89 ± 3.72	0.000465189
cg00952050	MYH7B	50.83 ± 9.54	55.17 ± 8.31	0.000465528
cg05310309	LIMS1	58.23 ± 11.4	66.79 ± 13.2	0.000465663
cg15204594	EPS15L1	68.09 ± 5.75	71.90 ± 5.64	0.000466087
cg00966078	EPHB2;EPHB2	78.74 ± 2.59	82.05 ± 2.67	0.00046641
cg18272633	KCNQ1;KCNQ1	85.07 ± 3.62	87.69 ± 3.59	0.000466733
cg14111697	GNAQ	66.50 ± 4.95	69.61 ± 5.23	0.000467208
cg01409552	Intergenic	78.33 ± 2.97	83.05 ± 2.72	0.000467768
cg00590590	Intergenic	51.13 ± 12.1	58.87 ± 11.6	0.000468569
cg06800293	TRIO	95.87 ± 1.50	97.40 ± 0.90	0.000468655
cg12838061	Intergenic	49.70 ± 6.73	52.76 ± 5.35	0.00046874
cg02461363	TMEM26	11.26 ± 2.32	13.49 ± 2.58	0.000469035
cg11177333	Intergenic	84.17 ± 1.65	86.63 ± 1.75	0.000470086
cg06633243	CAMK2D;CAMK2D;CAMK2D;CAMK2D;CAMK2D;CAMK2D	78.89 ± 4.60	84.12 ± 3.94	0.000470129
cg21915962	Intergenic	55.56 ± 3.82	58.61 ± 3.04	0.000470262
cg15903666	PRDM16;PRDM16	92.75 ± 1.44	93.68 ± 1.32	0.000470506
cg14709479	TTLL10	49.06 ± 8.84	54.21 ± 9.54	0.000471117
cg22322562	NRXN1;NRXN1;NRXN1	22.99 ± 5.89	25.89 ± 7.05	0.000471898
cg19780635	C14orf50	95.56 ± 1.06	96.66 ± 0.71	0.000472227
cg03962359	Intergenic	86.71 ± 2.23	89.45 ± 1.42	0.000472239
cg08277548	PADI3	28.26 ± 5.82	31.41 ± 4.50	0.000472514
cg27538095	ELSPBP1	88.07 ± 1.49	90.22 ± 1.51	0.00047252
cg18301423	PDLIM4;PDLIM4	9.68 ± 4.12	11.83 ± 5.27	0.000472914
cg20190552	Intergenic	90.68 ± 1.70	93.58 ± 0.92	0.000472979
cg14392168	GAL3ST4	68.29 ± 3.34	71.66 ± 1.90	0.000473009
cg11574184	MGC70857;KIAA1688	22.31 ± 1.99	24.62 ± 2.72	0.000473029
cg25925023	SPEG	32.24 ± 7.30	29.45 ± 7.12	0.000473592
cg11626195	KIAA0415	82.16 ± 2.86	84.47 ± 2.22	0.000473711
cg27331316	CSMD2	77.30 ± 4.08	79.98 ± 2.89	0.000474217
cg19939969	LAMB3;LAMB3;LAMB3	50.12 ± 5.43	55.25 ± 5.58	0.000474644
cg25603636	PCDHB18	13.71 ± 2.65	15.48 ± 2.98	0.000474671
cg26620157	PAX9	12.58 ± 2.88	15.14 ± 3.70	0.000474686
cg00760938	Intergenic	45.98 ± 15.8	54.07 ± 16.8	0.000474875
cg24011260	DPP6;DPP6	1.76 ± 0.35	2.20 ± 0.39	0.000475133
cg05291178	C3orf24;C3orf24	95.64 ± 0.61	96.19 ± 0.44	0.000475477
cg14459668	C10orf11	51.72 ± 17.4	59.28 ± 17.9	0.000476064
cg26190514	C1orf172	95.60 ± 0.89	96.80 ± 0.70	0.000477114
cg10802528	Intergenic	54.96 ± 7.82	59.80 ± 7.07	0.00047719
cg04058675	HUWE1	76.00 ± 5.32	80.85 ± 5.39	0.00047757
cg27664689	CACNB4;CACNB4;CACNB4;CACNB4	41.22 ± 12.9	48.64 ± 11.7	0.000478305
cg00704869	GRTP1	62.14 ± 7.44	66.71 ± 7.87	0.000478648
cg18396533	DYDC2;DYDC1	40.07 ± 2.31	41.85 ± 2.73	0.00047868
cg12193365	Intergenic	57.88 ± 4.12	64.34 ± 3.43	0.000478697
cg01148092	LRFN2	61.71 ± 3.98	64.26 ± 4.22	0.000479244
cg24582781	PTPN23	68.59 ± 3.28	72.00 ± 2.14	0.000479961
cg06853577	Intergenic	76.10 ± 2.92	80.42 ± 2.07	0.000480409
cg07351637	GALK2;GALK2	59.35 ± 12.7	68.18 ± 12.6	0.000480774
cg09908110	MACROD1	21.48 ± 17.1	26.65 ± 18.2	0.000481602
cg03101763	LTBP3;LTBP3;LTBP3	63.03 ± 3.33	66.49 ± 3.51	0.000482017
cg11596009	OSCP1;OSCP1	39.83 ± 6.79	43.26 ± 5.66	0.000482148
cg27561567	Intergenic	36.76 ± 2.20	40.12 ± 2.11	0.000482433
cg01447854	OBSCN	82.28 ± 3.21	85.29 ± 2.62	0.000483554
cg24084706	HDGF2;HDGF2	41.58 ± 5.41	44.82 ± 5.05	0.000483668
cg21238440	Intergenic	59.22 ± 9.62	64.22 ± 9.43	0.000483939
cg14277848	GPATCH4;GPATCH4	5.18 ± 0.74	6.51 ± 1.35	0.000484165
cg13552690	C9orf86;C9orf86	72.03 ± 4.75	75.94 ± 4.79	0.000486029
cg09181054	IFFO2	87.52 ± 1.99	89.77 ± 2.34	0.000486148
cg02660643	ZCCHC14	62.39 ± 5.85	66.26 ± 6.05	0.000486866
cg16160710	Intergenic	97.34 ± 0.40	97.74 ± 0.47	0.000487491
cg02733444	INPP5A	77.58 ± 8.62	80.68 ± 7.56	0.000488051
cg00425678	Intergenic	75.71 ± 5.89	80.43 ± 5.89	0.000488148
cg03530754	TMEM132C	5.43 ± 0.74	4.69 ± 0.44	0.00048973
cg20809224	C15orf2;C15orf2	59.43 ± 2.74	62.94 ± 4.15	0.000490204
cg04784014	FBXL18	91.35 ± 1.65	92.78 ± 1.69	0.000490312
cg00395929	LOC145783	59.56 ± 5.03	65.69 ± 2.79	0.0004905
cg23546356	A2ML1	65.74 ± 4.30	71.28 ± 4.43	0.000490951
cg10579986	MIR922;KIAA0226;KIAA0226	87.46 ± 3.37	90.35 ± 2.17	0.000491119
cg05740244	LDHC;LDHC	72.82 ± 3.70	76.51 ± 4.37	0.000492379
cg07601967	PAK7;PAK7	39.55 ± 2.60	44.54 ± 3.98	0.000492541
cg00530688	BTBD11;BTBD11	92.30 ± 1.27	94.19 ± 1.20	0.000492627
cg13663667	SIRT6	63.62 ± 2.93	66.33 ± 1.94	0.000492674
cg27626240	TNXB	67.98 ± 5.88	70.76 ± 5.52	0.000492831
cg23237765	C7orf20	67.06 ± 6.63	75.15 ± 2.74	0.000492976
cg06956295	TAF4	77.39 ± 2.56	79.93 ± 2.62	0.000493
cg09874177	CSRP2	2.51 ± 0.28	2.07 ± 0.32	0.000493188
cg03525254	ATXN7L2	49.46 ± 3.04	52.13 ± 2.76	0.000493459
cg14478475	MCART1;MCART1;MCART1	67.27 ± 4.47	69.99 ± 3.76	0.000493867
cg18641876	AKR1C2;AKR1C2	51.20 ± 5.09	56.60 ± 3.99	0.000495255
cg06156844	SERPINB10	82.30 ± 3.89	85.25 ± 2.60	0.000495803
cg19268720	PTPRJ;PTPRJ	64.12 ± 4.94	70.23 ± 5.32	0.000495845
cg08485899	LOC407835	78.59 ± 2.26	81.19 ± 2.15	0.000495858
cg27503117	RAVER1	75.16 ± 1.31	77.85 ± 1.37	0.000496046
cg20229788	FNDC4;GCKR	20.90 ± 8.65	27.05 ± 9.10	0.000496423
cg17795695	PPP2R2C;PPP2R2C	42.87 ± 14.0	49.40 ± 13.1	0.000496615
cg02827175	MAD1L1;MAD1L1;MAD1L1	95.57 ± 0.54	94.69 ± 0.66	0.000496886
cg04821042	ABLIM1;ABLIM1;ABLIM1	95.74 ± 0.82	97.12 ± 0.88	0.000497563
cg01557951	Intergenic	27.82 ± 3.83	30.39 ± 3.87	0.000497844
cg23238147	KIAA1026;C1orf126	57.40 ± 7.31	61.09 ± 7.82	0.000498177
cg11046169	ANAPC4	81.51 ± 3.28	85.69 ± 2.28	0.000498249
cg14160093	Intergenic	13.59 ± 3.40	16.19 ± 5.07	0.00049875
cg10036727	SESN3	5.38 ± 0.63	4.69 ± 0.51	0.000499154
cg19536281	Intergenic	92.95 ± 1.31	94.50 ± 0.92	0.000499892
cg11280108	Intergenic	75.07 ± 5.57	79.01 ± 5.28	0.000500101
cg24302235	SLC2A2	7.51 ± 3.24	10.93 ± 4.65	0.000500616
cg14781190	SERINC2	8.79 ± 0.90	7.47 ± 0.71	0.000500672
cg24589423	Intergenic	58.54 ± 10.1	66.11 ± 11.2	0.000501811
cg16463733	ZBTB9	9.34 ± 1.12	7.68 ± 0.88	0.000501837
cg19911850	WNT3A	77.88 ± 3.00	80.72 ± 2.99	0.00050187
cg15076368	XIRP1	43.50 ± 10.2	49.43 ± 10.0	0.000501998
cg17254701	CARD14	76.10 ± 2.12	79.03 ± 2.12	0.000503033
cg01720742	HSPC157;HSPC157	24.37 ± 12.6	28.96 ± 14.2	0.000503552
cg12503656	CSNK1D;CSNK1D	89.68 ± 4.01	91.72 ± 2.58	0.000503633
cg24001345	PDE6C;PDE6C	71.25 ± 5.55	74.88 ± 4.84	0.000504411
cg26419957	SETD1B	79.77 ± 2.26	81.89 ± 1.67	0.000504612
cg25457200	DPP8;DPP8;DPP8	50.18 ± 8.96	57.78 ± 10.3	0.000505056
cg18171955	C11orf9;C11orf9	90.94 ± 1.16	92.85 ± 1.61	0.000505289
cg16285206	Intergenic	84.81 ± 3.17	87.42 ± 3.18	0.00050573
cg13624631	DHRS7	14.52 ± 12.0	18.83 ± 14.8	0.000506102
cg26169783	Intergenic	34.69 ± 13.2	42.08 ± 14.7	0.000506237
cg26509269	Intergenic	39.97 ± 6.71	43.90 ± 6.59	0.000506273
cg06646493	SLC22A15	10.02 ± 0.98	8.68 ± 0.89	0.000506291
cg17589056	Intergenic	47.21 ± 8.87	53.11 ± 8.88	0.000506846
cg25320443	U2AF2;EPN1;EPN1;U2AF2	62.47 ± 2.95	64.78 ± 2.29	0.0005072
cg15127867	SFT2D3	94.15 ± 1.85	95.60 ± 1.07	0.000507227
cg07120254	TNFRSF21	82.54 ± 6.08	87.17 ± 3.79	0.000508394
cg21851956	GRID2IP	63.69 ± 2.67	67.28 ± 2.31	0.000508988
cg04018702	Intergenic	38.25 ± 2.09	43.67 ± 4.12	0.000509472
cg08859215	FAM20A	59.79 ± 15.6	67.11 ± 13.9	0.000510325
cg11044605	BAALC;BAALC	94.01 ± 1.56	94.78 ± 1.07	0.000511734
cg25504143	AMMECR1;AMMECR1;AMMECR1	44.85 ± 6.65	48.48 ± 6.52	0.00051186
cg22562363	TACC2;TACC2	60.94 ± 4.09	66.36 ± 3.14	0.000511872
cg04786287	Intergenic	27.50 ± 1.51	29.66 ± 1.53	0.000511891
cg05921762	Intergenic	87.20 ± 2.35	90.22 ± 1.91	0.000512523
cg02581828	Intergenic	62.79 ± 2.24	65.03 ± 1.29	0.00051269
cg02493217	Intergenic	19.10 ± 5.12	22.25 ± 5.34	0.000512933
cg16262357	SNX26	5.59 ± 0.60	4.72 ± 0.63	0.000512991
cg06938191	ZMYM2;ZMYM2	59.73 ± 5.17	65.50 ± 4.99	0.00051344
cg23868719	Intergenic	92.43 ± 1.13	94.18 ± 1.05	0.00051402
cg03898962	CDK5R1	46.32 ± 7.98	50.67 ± 9.20	0.000515194
cg07442409	Intergenic	8.38 ± 1.68	7.01 ± 1.09	0.0005157
cg15652532	LCLAT1;LCLAT1	22.93 ± 19.7	26.19 ± 20.7	0.000516235
cg21245618	VAV2;VAV2	86.05 ± 2.35	88.57 ± 1.41	0.000517009
cg16610810	ITGA9	77.35 ± 2.93	81.16 ± 1.89	0.000517601
cg14390764	PTGES	51.30 ± 2.90	54.90 ± 1.74	0.000518087
cg06019050	LIN54;LIN54;LIN54	94.66 ± 1.25	96.10 ± 1.21	0.000518409
cg09217157	ENTPD1;ENTPD1;ENTPD1;ENTPD1;ENTPD1;ENTPD1;ENTPD1	44.76 ± 6.10	50.22 ± 5.60	0.000519227
cg13299984	PRDM16;PRDM16	63.32 ± 7.61	67.62 ± 7.72	0.0005195
cg07270289	Intergenic	91.79 ± 10.0	94.20 ± 6.04	0.000519601
cg10046620	HIST1H2AI	13.78 ± 3.30	16.38 ± 4.10	0.000519728
cg02157083	APOA5;APOA5	79.00 ± 6.18	82.47 ± 5.70	0.000519851
cg12137220	EPN2;EPN2;EPN2	36.82 ± 11.7	42.97 ± 12.1	0.000520567
cg07163547	RXRG;RXRG	26.14 ± 5.60	31.05 ± 5.97	0.000521014
cg11784191	U2AF2;U2AF2	81.21 ± 1.72	84.05 ± 2.69	0.000522106
cg13650062	Intergenic	73.99 ± 7.80	81.47 ± 5.53	0.000522452
cg19804860	POLR2A	94.46 ± 1.28	96.26 ± 0.90	0.000522571
cg24625984	Intergenic	53.57 ± 5.87	58.32 ± 5.84	0.000522773
cg15256874	PIAS4	3.34 ± 0.22	3.10 ± 0.29	0.000523117
cg01965462	ERBB4;ERBB4	34.30 ± 11.9	42.25 ± 12.1	0.000524055
cg04746303	GPSM3;NOTCH4	5.37 ± 0.62	4.54 ± 0.89	0.000524561
cg08761073	PRLR	91.09 ± 1.67	92.80 ± 1.27	0.000524726
cg05445097	DLG5	75.88 ± 4.47	81.78 ± 2.31	0.000524844
cg00162611	Intergenic	87.33 ± 1.46	89.02 ± 1.76	0.000524913
cg20959907	DOCK4	87.54 ± 3.11	89.70 ± 2.70	0.000524932
cg02775883	SRGAP3;SRGAP3	69.32 ± 9.77	76.38 ± 9.63	0.000525425
cg00047287	CPT1B;CPT1B;CPT1B;CHKB-CPT1B;CPT1B;CPT1B;CPT1B;CPT1B	83.94 ± 5.47	86.09 ± 4.27	0.00052566
cg03840289	MXD4	35.20 ± 4.09	39.90 ± 4.91	0.000526269
cg03708092	Intergenic	80.62 ± 3.36	83.85 ± 2.05	0.000526374
cg06668506	Intergenic	93.51 ± 1.88	95.57 ± 0.78	0.000526798
cg04658823	Intergenic	93.27 ± 1.45	95.46 ± 0.92	0.000527551
cg21996247	Intergenic	94.40 ± 0.89	95.73 ± 0.81	0.000527647
cg01145317	FOXF1	2.90 ± 0.35	3.43 ± 0.49	0.000527695
cg21287017	C20orf103	90.69 ± 2.93	92.46 ± 2.23	0.000527817
cg16399632	CTBP1;CTBP1;C4orf42	37.98 ± 7.26	35.22 ± 8.17	0.000527968
cg15205527	Intergenic	6.79 ± 2.85	8.02 ± 3.14	0.000527977
cg21645752	GABBR1;GABBR1	92.72 ± 1.45	94.11 ± 1.12	0.000528044
cg18369680	Intergenic	63.46 ± 3.79	66.94 ± 3.86	0.000529915
cg17499826	DMPK;DMPK;DMPK;DMPK	49.64 ± 2.13	52.73 ± 2.62	0.00053046
cg00366813	DCAF17;METTL8;DCAF17;DCAF17	7.70 ± 0.70	8.93 ± 1.21	0.000530762
cg02951457	PPP1R14D;PPP1R14D	59.64 ± 2.75	64.10 ± 2.47	0.000531298
cg20170809	TNXB	48.29 ± 4.66	51.07 ± 4.46	0.000531448
cg13864663	VPS33A	92.30 ± 2.40	93.87 ± 1.41	0.000532052
cg11361049	TNXB	68.84 ± 3.76	73.43 ± 2.83	0.000532727
cg04564333	PPPDE1	86.80 ± 2.33	89.55 ± 2.03	0.000533392
cg23545793	BAIAP2L1	72.11 ± 8.73	76.66 ± 9.21	0.000533816
cg16298282	KIAA0776	9.95 ± 1.07	8.26 ± 1.16	0.000534373
cg00846166	OLFM2	42.35 ± 5.39	45.77 ± 6.41	0.000535213
cg23953174	CD3EAP;PPP1R13L;PPP1R13L	5.66 ± 0.84	4.72 ± 0.78	0.000535542
cg19111773	LOC202181	71.95 ± 4.29	78.46 ± 2.99	0.000535798
cg08241360	FAM125B	58.65 ± 11.6	65.27 ± 11.3	0.000536035
cg10393508	Intergenic	79.79 ± 3.34	82.64 ± 3.17	0.000536767
cg16500173	ETV5	6.67 ± 0.62	5.81 ± 0.56	0.000537361
cg09492074	MEGF11	69.48 ± 6.77	73.34 ± 6.18	0.000537835
cg09869502	DPEP1;DPEP1	82.99 ± 2.29	85.94 ± 2.18	0.000537849
cg01154336	Intergenic	58.19 ± 8.54	64.34 ± 8.65	0.00053806
cg03014969	C2orf69	61.58 ± 4.47	64.57 ± 4.61	0.000538305
cg04189389	SCML2	58.93 ± 9.81	62.49 ± 10.3	0.000538358
cg10053073	RECQL5	69.56 ± 3.48	73.07 ± 4.17	0.000538818
cg09339841	UGT1A10;UGT1A6;UGT1A8;UGT1A4;UGT1A3;UGT1A6;UGT1A9;UGT1A7;UGT1A5	76.32 ± 2.93	79.23 ± 2.88	0.000538899
cg18682923	KDM3B	93.56 ± 1.14	92.37 ± 1.05	0.000539588
cg08167129	BOD1L	5.39 ± 0.81	6.14 ± 0.74	0.000539624
cg26435198	Intergenic	72.24 ± 3.16	75.72 ± 3.63	0.000539892
cg02009255	C20orf177;PPP1R3D	3.23 ± 0.56	2.59 ± 0.45	0.000539935
cg03570948	LOC100133308	70.81 ± 3.22	75.04 ± 2.20	0.000540077
cg08147563	ROBO1;ROBO1;ROBO1;ROBO1	43.95 ± 4.96	48.37 ± 5.14	0.000540124
cg24088023	TSPAN7	93.43 ± 2.81	95.04 ± 3.02	0.000540981
cg00859147	OR2Z1	65.77 ± 3.42	67.94 ± 2.72	0.000541314
cg17866455	SCAND2;SCAND2	44.13 ± 6.72	46.25 ± 6.78	0.000541931
cg07261848	ACTL6A;ACTL6A;ACTL6A	14.44 ± 2.46	11.45 ± 1.09	0.000542025
cg18245976	WDR60	62.24 ± 3.23	64.11 ± 3.40	0.000543243
cg13992911	Intergenic	12.90 ± 5.10	14.39 ± 4.87	0.000543806
cg10296410	MEI1	3.47 ± 0.89	4.35 ± 0.93	0.000544115
cg04741118	CDK17;CDK17	40.36 ± 8.58	47.38 ± 8.49	0.00054506
cg20190649	SKAP1;SKAP1	84.60 ± 10.7	80.68 ± 13.2	0.000545458
cg00895528	BIRC7;BIRC7;BIRC7;BIRC7	55.74 ± 3.55	58.91 ± 3.27	0.000546583
cg00022633	CDK8	4.46 ± 0.63	5.72 ± 1.08	0.000546917
cg05880817	C15orf33;DTWD1;C15orf33;DTWD1	6.59 ± 0.83	5.72 ± 0.96	0.000547057
cg15156226	Intergenic	6.34 ± 1.58	8.73 ± 2.17	0.000547204
cg03762393	POLRMT	91.85 ± 1.68	93.15 ± 1.19	0.000547398
cg16524108	COQ6;FAM161B;COQ6	76.97 ± 4.57	81.26 ± 3.47	0.000547653
cg11844358	NFATC1;NFATC1;NFATC1;NFATC1;NFATC1	96.68 ± 0.98	97.66 ± 0.59	0.000547706
cg21814995	TGFBR2;TGFBR2	44.22 ± 12.2	49.90 ± 11.5	0.000548479
cg19606096	MRPL42;MRPL42;MRPL42	7.85 ± 1.13	9.39 ± 1.09	0.00054885
cg05255095	Intergenic	54.75 ± 8.12	59.52 ± 7.13	0.000548907
cg09578155	LRP5	42.47 ± 8.24	46.67 ± 8.60	0.000548937
cg11804350	VWF	72.82 ± 5.33	78.57 ± 3.43	0.00055066
cg18009093	COL23A1	81.03 ± 3.01	84.22 ± 2.92	0.000550719
cg02400458	Intergenic	84.01 ± 2.97	86.72 ± 2.38	0.000550962
cg13151269	ACY1	80.64 ± 2.30	84.41 ± 2.70	0.00055234
cg26552789	TRAM2	4.15 ± 0.72	3.04 ± 0.54	0.000553008
cg23715715	CEND1	65.00 ± 3.96	69.10 ± 4.58	0.000553181
cg08610228	ITIH5;ITIH5	75.44 ± 4.95	80.43 ± 5.68	0.000553197
cg15541398	Intergenic	84.04 ± 1.72	87.20 ± 1.61	0.000553396
cg14799489	APBA3	73.59 ± 2.20	76.51 ± 1.34	0.00055434
cg09965996	GNAO1	3.41 ± 0.57	4.63 ± 0.99	0.000554819
cg17515024	HIST3H2BB	48.88 ± 5.39	52.86 ± 5.73	0.000555198
cg12059864	FYN;FYN;FYN	59.84 ± 8.70	64.46 ± 7.06	0.000555474
cg11990419	Intergenic	39.50 ± 6.74	42.70 ± 7.08	0.000556252
cg17167253	EN1	16.15 ± 2.72	18.33 ± 2.45	0.000556676
cg00439981	FAM120B	96.05 ± 0.82	97.27 ± 0.98	0.000557374
cg20525527	MPRIP;MPRIP	84.30 ± 2.66	86.75 ± 1.94	0.000557466
cg09360974	Intergenic	55.75 ± 6.36	60.32 ± 5.14	0.000557599
cg14377687	Intergenic	69.01 ± 4.64	72.27 ± 3.30	0.000558063
cg23846145	SLC39A8;SLC39A8;SLC39A8	2.88 ± 0.38	2.35 ± 0.35	0.000558354
cg04859886	TMEM184A	91.25 ± 0.75	92.71 ± 1.19	0.000558463
cg21606866	TMEM125	81.47 ± 13.6	77.09 ± 15.7	0.000559379
cg04831900	Intergenic	74.21 ± 2.74	77.77 ± 2.28	0.000560332
cg27665985	Intergenic	6.54 ± 0.68	7.62 ± 0.67	0.000560607
cg15631966	ACADS;ACADS	5.96 ± 0.50	5.40 ± 0.45	0.000560688
cg15792367	KLK11;KLK11;KLK11	66.79 ± 5.30	70.12 ± 4.68	0.000561732
cg25577670	SVIL;SVIL	89.18 ± 0.95	90.66 ± 0.80	0.000562234
cg09895909	Intergenic	82.57 ± 2.97	85.86 ± 3.05	0.000562253
cg23479303	HADHB	64.77 ± 3.00	69.49 ± 3.17	0.00056258
cg18116486	ACTR10	4.57 ± 0.61	5.42 ± 0.53	0.000562696
cg01063759	VTRNA1-3	3.93 ± 0.76	4.80 ± 0.78	0.000563534
cg08324730	Intergenic	64.90 ± 3.75	68.67 ± 3.60	0.000563734
cg06506128	CEP57	77.53 ± 8.75	83.38 ± 8.22	0.000563854
cg20642417	GABBR1;GABBR1;GABBR1	69.53 ± 3.15	72.31 ± 3.40	0.000564102
cg10201402	STK19;STK19;STK19;DOM3Z	61.76 ± 3.61	64.76 ± 2.89	0.000564114
cg25137687	CXCL3	6.77 ± 0.65	5.44 ± 1.00	0.00056495
cg20927724	PLIN1;PLIN1	42.15 ± 4.96	45.06 ± 4.94	0.000565765
cg10692700	Intergenic	89.92 ± 2.31	91.36 ± 1.50	0.000565837
cg08834436	Intergenic	17.22 ± 7.13	21.02 ± 8.37	0.000567601
cg11295113	FOLR2;FOLR2;FOLR2;FOLR2;FOLR2;FOLR2;FOLR2;FOLR2	88.39 ± 1.93	90.90 ± 1.36	0.000568044
cg00751633	Intergenic	95.48 ± 0.85	96.33 ± 0.63	0.000570061
cg04476839	Intergenic	92.44 ± 1.25	93.45 ± 1.12	0.000570273
cg02455836	EIF2C2;EIF2C2	94.99 ± 0.95	95.91 ± 0.74	0.000570302
cg08028698	Intergenic	78.08 ± 3.35	82.02 ± 2.25	0.000570778
cg22796025	Intergenic	59.88 ± 9.28	66.88 ± 7.55	0.000570797
cg01616225	GPR56;GPR56;GPR56;GPR56;GPR56;GPR56;GPR56	27.57 ± 13.5	31.92 ± 14.4	0.000571395
cg13278126	Intergenic	94.52 ± 1.40	95.92 ± 0.63	0.000571528
cg14835575	RSU1;RSU1;RSU1;RSU1	34.73 ± 1.22	36.27 ± 1.55	0.000571629
cg01308409	KL	35.54 ± 7.38	39.34 ± 7.03	0.000573146
cg01079632	SMG1	65.83 ± 3.57	67.99 ± 2.94	0.000573269
cg05660881	SPATA13;SPATA13	57.63 ± 5.02	62.62 ± 6.35	0.000573419
cg04099767	ATP11A;ATP11A	61.25 ± 3.63	63.32 ± 3.75	0.000573972
cg19302283	BTC	69.11 ± 2.39	71.48 ± 2.00	0.000574787
cg01796044	FBXL19	91.42 ± 2.17	94.04 ± 1.23	0.000574825
cg09810078	DDR1;DDR1;DDR1	93.10 ± 2.04	94.33 ± 1.14	0.000574984
cg13691744	SLC44A4	35.25 ± 2.75	39.82 ± 3.39	0.000575679
cg26388509	CNPY1	33.61 ± 11.1	39.74 ± 12.8	0.000575809
cg14003039	VARS	71.93 ± 2.73	75.18 ± 1.71	0.00057671
cg08971161	ZBBX	93.27 ± 1.40	95.41 ± 1.10	0.000576717
cg25923018	TMEM206	3.05 ± 0.42	2.40 ± 0.42	0.000577225
cg15569801	Intergenic	96.25 ± 0.64	96.89 ± 0.50	0.000577431
cg14737263	Intergenic	85.07 ± 3.52	88.63 ± 2.02	0.000577788
cg12535715	HTRA4;HTRA4	66.10 ± 4.41	69.91 ± 5.58	0.000578587
cg23641635	AGL;AGL;AGL;AGL;AGL	89.15 ± 2.20	91.26 ± 1.36	0.000579043
cg22149137	HOXB13	20.60 ± 2.09	23.44 ± 2.40	0.000579223
cg10929690	Intergenic	55.76 ± 4.50	58.27 ± 5.14	0.000579243
cg25051233	FOXJ1	62.34 ± 5.47	65.80 ± 6.09	0.000579551
cg19431272	S1PR5;S1PR5	32.85 ± 6.42	36.18 ± 6.64	0.000579825
cg05644049	SRM	47.23 ± 3.79	52.41 ± 5.58	0.000579902
cg24499677	Intergenic	74.58 ± 2.37	77.86 ± 1.86	0.000580047
cg19341630	KIAA0427;KIAA0427	69.65 ± 2.53	72.63 ± 2.14	0.00058024
cg04284956	WHSC1;WHSC1;WHSC1;WHSC1;WHSC1	64.38 ± 3.48	67.32 ± 2.89	0.000580268
cg02647628	FOXP2;FOXP2;FOXP2	29.55 ± 7.47	36.44 ± 9.66	0.000580696
cg10531088	USP26	60.78 ± 9.41	66.77 ± 9.29	0.000581051
cg00248875	SLC38A10;SLC38A10	94.80 ± 1.43	96.19 ± 0.87	0.000581142
cg06607679	Intergenic	53.82 ± 2.63	55.95 ± 2.41	0.000581446
cg22719871	BRMS1;BRMS1;RIN1	40.17 ± 9.51	45.40 ± 10.1	0.000581705
cg23004862	C5orf25	50.44 ± 11.9	57.23 ± 11.2	0.000582243
cg17268801	ZNF254	22.72 ± 1.85	26.83 ± 2.92	0.000582913
cg18883836	EPB41;EPB41;EPB41;EPB41;EPB41;EPB41	8.86 ± 2.35	7.66 ± 2.05	0.000583122
cg27345346	C19orf55	54.95 ± 5.12	58.82 ± 4.51	0.000583545
cg13692416	DIP2C	81.18 ± 1.83	83.73 ± 1.33	0.000583919
cg12629515	HIST1H3J;HIST1H2BO	66.38 ± 5.05	69.49 ± 4.54	0.000584408
cg25331880	C19orf2;C19orf2	59.54 ± 7.91	65.32 ± 6.30	0.000584592
cg17545418	MT1IP	28.83 ± 12.7	32.02 ± 13.0	0.000585295
cg09993853	LIPA;LIPA	95.35 ± 0.76	96.23 ± 0.79	0.000585501
cg03337093	BARHL1	29.90 ± 5.22	27.64 ± 4.92	0.000586186
cg00303811	SLC30A3	84.20 ± 2.66	87.74 ± 1.94	0.000586619
cg18578578	Intergenic	58.29 ± 3.58	62.09 ± 3.52	0.000588312
cg02210222	Intergenic	54.41 ± 3.89	57.37 ± 3.56	0.000588599
cg11024682	SREBF1;SREBF1	58.80 ± 10.0	63.21 ± 10.4	0.000588608
cg06731599	ATP6AP2	13.41 ± 14.0	12.08 ± 13.1	0.000589325
cg21908038	DNASE2	56.95 ± 4.23	62.39 ± 1.80	0.000589354
cg01388187	KIAA0226;KIAA0226	92.88 ± 0.74	93.96 ± 0.81	0.000590001
cg19538724	C10orf71;C10orf71	64.44 ± 4.88	67.33 ± 5.06	0.000590079
cg07027513	B4GALT6	11.38 ± 2.93	13.46 ± 2.90	0.000590207
cg05970811	SRGAP1	36.22 ± 7.67	41.57 ± 7.93	0.000590279
cg15510895	CHST8;CHST8;CHST8	57.15 ± 7.01	61.79 ± 6.84	0.000590644
cg03339077	C11orf49;C11orf49;C11orf49;C11orf49	62.94 ± 7.00	67.34 ± 5.56	0.000590982
cg16828576	Intergenic	66.60 ± 4.20	72.57 ± 2.13	0.000591134
cg03884572	CUX2	75.89 ± 5.60	79.98 ± 5.99	0.000591319
cg10853416	MS4A7;MS4A7;MS4A7;MS4A7	90.68 ± 2.38	92.57 ± 2.04	0.000591449
cg25797455	TSC22D4	76.40 ± 4.73	79.86 ± 3.40	0.000592036
cg04671145	Intergenic	4.13 ± 0.88	4.95 ± 0.72	0.000592105
cg00607194	Intergenic	74.64 ± 8.16	79.29 ± 6.49	0.000592362
cg10204325	Intergenic	71.82 ± 3.22	75.96 ± 2.11	0.000593804
cg17356467	AFF3	82.21 ± 2.70	84.44 ± 2.90	0.000594266
cg00857734	HEATR2	63.28 ± 4.61	67.77 ± 5.13	0.000594636
cg09005971	Intergenic	49.74 ± 5.40	53.23 ± 6.40	0.000595139
cg03612683	PSG11;PSG11;PSG11	61.36 ± 2.21	63.43 ± 1.84	0.000596533
cg15811530	Intergenic	61.70 ± 3.48	64.80 ± 2.96	0.000597268
cg03901836	C2orf57	89.45 ± 2.10	88.10 ± 1.51	0.000597461
cg03025830	FGF17	71.96 ± 7.96	76.25 ± 7.62	0.000597508
cg12137286	SHISA7	3.31 ± 0.60	2.75 ± 0.74	0.000598468
cg10075464	Intergenic	76.16 ± 2.34	79.01 ± 1.15	0.000598475
cg10404336	LYNX1;LYNX1;LYNX1;LYNX1	14.51 ± 2.10	11.83 ± 1.67	0.000598537
cg20693615	GNAT1;GNAT1	81.09 ± 4.41	85.17 ± 4.18	0.000598953
cg14943113	Intergenic	10.43 ± 1.91	12.31 ± 1.16	0.000599306
cg14194983	NPPA	20.13 ± 8.92	23.00 ± 9.91	0.000599464
cg12534150	APC;APC;APC;APC;APC	11.72 ± 9.05	14.28 ± 9.54	0.000599864
cg05308135	OR1J1	87.72 ± 1.55	90.00 ± 1.66	0.000600334
cg15780361	ALS2CR11;ALS2CR11;ALS2CR11;ALS2CR11	42.17 ± 6.18	45.40 ± 5.94	0.000600442
cg12577199	POLR3B;POLR3B	5.67 ± 0.76	4.93 ± 0.55	0.000600546
cg07743805	Intergenic	54.16 ± 4.21	58.05 ± 5.18	0.000600618
cg27264390	Intergenic	52.27 ± 6.73	55.75 ± 6.17	0.000600812
cg01373505	Intergenic	92.16 ± 1.14	93.66 ± 0.83	0.000600985
cg23267558	KLHL1;KLHL1;ATXN8OS	29.76 ± 12.8	36.16 ± 12.7	0.000601035
cg16270018	HTN1	76.83 ± 2.47	80.34 ± 2.11	0.000601151
cg12366968	MAD1L1;MAD1L1;MAD1L1	59.90 ± 3.63	63.41 ± 3.54	0.000601272
cg19621753	RAX	42.52 ± 4.26	46.51 ± 4.02	0.000601885
cg11237215	Intergenic	86.87 ± 2.06	88.60 ± 1.76	0.000602054
cg07161179	TMEM80;TMEM80	71.09 ± 4.03	74.33 ± 3.94	0.000602528
cg16435316	BRD7	76.95 ± 4.03	81.31 ± 4.55	0.000603557
cg16935980	EN2	25.86 ± 8.59	29.29 ± 9.47	0.000603727
cg23398720	B4GALT7	58.95 ± 3.97	62.15 ± 3.46	0.00060395
cg04898124	SULF2;SULF2;SULF2	63.85 ± 10.1	69.48 ± 9.02	0.000603955
cg12659606	Intergenic	31.36 ± 1.58	33.64 ± 1.95	0.000604376
cg03805684	FEN1;C11orf10;MIR611	37.99 ± 3.77	41.09 ± 3.52	0.000605501
cg25560398	ECEL1P2	41.58 ± 4.85	37.99 ± 6.00	0.000606204
cg26486069	RBM3	54.53 ± 3.97	58.55 ± 4.20	0.000606483
cg21041956	NACA;NACA;NACA;NACA	17.90 ± 2.74	21.11 ± 2.98	0.000606693
cg12719006	AGPAT1;AGPAT1	89.24 ± 2.64	91.11 ± 2.02	0.000606891
cg04913666	FRS2;FRS2	95.64 ± 1.16	96.68 ± 0.65	0.000607304
cg11703007	TRPM7	78.06 ± 9.23	81.62 ± 7.16	0.000607593
cg15611936	Intergenic	65.24 ± 1.49	67.57 ± 1.91	0.000608358
cg18909982	TUSC3;TUSC3	68.49 ± 5.06	74.00 ± 4.28	0.000608567
cg22657351	MARCO	83.02 ± 2.16	85.68 ± 1.35	0.000608679
cg09773458	SLN	44.30 ± 4.96	47.80 ± 5.56	0.000608843
cg26625729	Intergenic	87.23 ± 4.88	89.71 ± 4.09	0.000610135
cg05726239	SOBP	25.25 ± 14.4	31.99 ± 16.0	0.000610755
cg09772299	Intergenic	41.20 ± 2.85	43.43 ± 3.12	0.000611013
cg25520356	RPS6KA2;RPS6KA2	90.75 ± 3.00	92.33 ± 2.64	0.000611252
cg12964019	Intergenic	73.24 ± 2.97	75.42 ± 1.48	0.000611323
cg27049076	PPP1CA;PPP1CA;PPP1CA	78.02 ± 2.98	80.91 ± 3.66	0.000611586
cg08104023	Intergenic	58.35 ± 2.65	60.44 ± 2.80	0.000611742
cg20318156	LPPR5;LPPR5	53.12 ± 9.50	58.76 ± 10.2	0.000612569
cg19953847	Intergenic	61.48 ± 2.49	64.25 ± 2.27	0.000612672
cg20675251	ATAD3A;ATAD3A;ATAD3A	57.64 ± 3.66	60.24 ± 3.48	0.000612857
cg07282879	Intergenic	63.11 ± 3.16	65.56 ± 3.03	0.000613753
cg21845373	BACE2;PLAC4;BACE2;BACE2	47.86 ± 2.25	50.85 ± 2.23	0.000614578
cg06908052	RPTOR;RPTOR	93.26 ± 1.56	93.96 ± 1.80	0.000614807
cg07780762	Intergenic	76.89 ± 2.48	79.33 ± 2.43	0.000615054
cg00621943	LY6G5C	72.81 ± 3.41	76.22 ± 2.46	0.000615531
cg11352369	Intergenic	52.86 ± 3.01	55.84 ± 2.81	0.000615667
cg19020434	RESP18	92.66 ± 5.82	90.35 ± 6.61	0.000615996
cg15087129	COL6A2;COL6A2;COL6A2	92.50 ± 1.34	93.80 ± 0.76	0.000616067
cg14334245	Intergenic	81.24 ± 2.09	83.32 ± 2.34	0.000616508
cg00524899	NCKAP5;NCKAP5	73.76 ± 4.08	78.48 ± 2.23	0.00061662
cg06208665	Intergenic	55.61 ± 3.46	58.48 ± 3.81	0.000616882
cg06351981	SPEG	44.01 ± 11.1	51.03 ± 11.1	0.000617049
cg10164686	SERPINB6;SERPINB6	2.74 ± 0.44	2.23 ± 0.29	0.000617431
cg25144574	SLC1A3;SLC1A3	79.55 ± 3.07	83.17 ± 2.32	0.000618566
cg05424831	ATXN7L1	96.46 ± 0.85	97.25 ± 0.51	0.000619041
cg15754112	KCNMA1;KCNMA1;KCNMA1;KCNMA1	71.95 ± 4.50	76.31 ± 4.22	0.000620105
cg20185454	MYST2	34.80 ± 5.75	40.32 ± 5.78	0.000620197
cg06166341	CTBP1;CTBP1	64.67 ± 10.6	69.77 ± 8.87	0.000620243
cg02500231	NOS1	35.05 ± 10.2	37.66 ± 10.1	0.000620296
cg02994066	TOLLIP	80.80 ± 8.96	85.24 ± 6.25	0.000620917
cg13598528	C15orf24;PGBD4	3.61 ± 0.43	4.35 ± 0.60	0.000621066
cg07733481	SEMA5B	28.46 ± 6.17	32.17 ± 7.52	0.000621086
cg21546022	Intergenic	64.55 ± 8.77	69.90 ± 9.17	0.000621251
cg09320993	DICER1;DICER1;FLJ45244	10.74 ± 1.38	8.92 ± 0.77	0.000621536
cg20908326	TRIM44	53.69 ± 15.4	61.71 ± 15.8	0.000621547
cg03082234	GTF2IRD1;GTF2IRD1	61.30 ± 13.9	67.75 ± 13.0	0.000621606
cg14005240	ATP4A	81.06 ± 3.43	83.39 ± 2.68	0.000621672
cg02081701	NXPH2	9.50 ± 2.93	12.49 ± 3.56	0.000622664
cg21643649	XAB2	52.35 ± 4.11	54.89 ± 4.29	0.000622672
cg09600715	Intergenic	20.24 ± 3.14	22.25 ± 2.47	0.00062299
cg23242649	FER1L4	68.48 ± 3.33	70.93 ± 2.26	0.00062343
cg01874112	Intergenic	49.97 ± 6.70	54.17 ± 6.54	0.000623451
cg00692279	IL17REL	50.58 ± 3.80	53.45 ± 3.76	0.00062386
cg13069964	C17orf48;SCO1;C17orf48	2.48 ± 0.35	2.07 ± 0.28	0.000624161
cg14987431	Intergenic	35.35 ± 3.23	32.20 ± 3.94	0.000624167
cg09416271	DCTN1;DCTN1	76.40 ± 2.72	80.46 ± 3.96	0.000624185
cg27471755	FFAR1;FFAR1	48.16 ± 9.62	52.01 ± 10.4	0.00062439
cg18000800	Intergenic	55.85 ± 3.94	62.46 ± 3.93	0.000625743
cg23650853	PANK2;MIR103-2;PANK2;PANK2	89.54 ± 1.43	91.33 ± 1.48	0.000626555
cg20688917	HOXA3;HOXA3	34.64 ± 4.06	38.70 ± 4.54	0.000628118
cg17610800	EVX1	29.28 ± 2.85	33.02 ± 3.61	0.000628224
cg12218747	Intergenic	84.31 ± 3.02	87.16 ± 2.79	0.000628639
cg15893360	PXN;PXN	70.95 ± 8.28	75.33 ± 7.03	0.000628763
cg07303091	PRICKLE1;PRICKLE1;PRICKLE1;PRICKLE1	67.54 ± 8.54	72.68 ± 8.21	0.000628915
cg00853819	MAD1L1;MAD1L1;MAD1L1	77.03 ± 7.93	82.02 ± 6.34	0.000629775
cg03424602	CAMKK2;CAMKK2;CAMKK2;CAMKK2;CAMKK2;CAMKK2;CAMKK2	63.88 ± 5.86	67.64 ± 5.12	0.000630339
cg00920572	HOXC12	33.46 ± 3.88	36.64 ± 3.36	0.000631052
cg02468154	HSD17B12	80.08 ± 1.55	81.69 ± 1.64	0.000631464
cg10738041	Intergenic	80.85 ± 5.98	83.71 ± 4.84	0.000631532
cg00067538	SPATA3	83.28 ± 2.94	86.33 ± 2.99	0.000631602
cg20430047	C20orf26	42.41 ± 4.13	46.56 ± 6.26	0.000633154
cg19714985	Intergenic	18.81 ± 8.59	21.35 ± 9.49	0.000633476
cg08674281	ME3;ME3;ME3	85.04 ± 2.87	88.07 ± 2.23	0.000633911
cg27587125	C1orf59;C1orf59	21.78 ± 6.03	24.59 ± 5.85	0.000634006
cg00753714	NKD1	96.46 ± 0.46	97.08 ± 0.33	0.000634271
cg02914510	Intergenic	93.19 ± 1.34	94.36 ± 1.33	0.000635227
cg27231793	PPP1R10	95.27 ± 1.07	96.31 ± 0.83	0.000635358
cg07297832	SEMA5B	47.50 ± 3.61	51.14 ± 3.93	0.000635737
cg26859557	RPP21	89.48 ± 1.73	91.88 ± 1.51	0.000636344
cg26163223	MUL1	3.09 ± 0.30	3.52 ± 0.36	0.000636455
cg04330126	Intergenic	93.10 ± 1.34	94.90 ± 0.94	0.000636735
cg11780096	RBM45	45.65 ± 2.79	49.09 ± 1.33	0.000636957
cg07925549	KRT75	73.96 ± 3.84	77.66 ± 2.68	0.000637133
cg11308697	TBC1D1	94.22 ± 0.97	95.60 ± 0.62	0.000637146
cg15500117	CCDC97	3.06 ± 0.34	3.68 ± 0.39	0.000637476
cg15670579	TARSL2	4.63 ± 0.57	4.00 ± 0.30	0.000637656
cg05537380	SHC2	8.15 ± 1.99	6.49 ± 1.30	0.000638535
cg05515072	PRDM11	21.08 ± 8.70	26.22 ± 10.9	0.000638873
cg21054842	Intergenic	9.55 ± 1.56	11.27 ± 2.36	0.000639127
cg00907402	WDTC1	2.41 ± 0.25	2.03 ± 0.15	0.000639837
cg12342520	Intergenic	95.45 ± 0.82	96.21 ± 1.04	0.000640154
cg00478326	Intergenic	36.27 ± 5.11	39.74 ± 4.66	0.000640187
cg07204937	GOLGA7B	5.45 ± 0.72	4.46 ± 0.74	0.000640209
cg09622203	PKIG;PKIG;PKIG	6.28 ± 0.74	5.48 ± 0.82	0.000640481
cg22125902	MAN1C1	81.08 ± 2.36	84.76 ± 2.55	0.000640494
cg26852857	Intergenic	93.46 ± 1.19	94.48 ± 0.89	0.000640857
cg26445785	LOC93432	71.20 ± 3.85	76.30 ± 4.07	0.000641767
cg03013817	FSIP1	51.24 ± 6.18	55.70 ± 7.33	0.000642294
cg09400272	Intergenic	87.60 ± 3.30	89.98 ± 3.09	0.000642525
cg22631555	ARMC3	11.12 ± 2.97	13.33 ± 2.94	0.000642682
cg00175150	ECM1;ECM1	65.06 ± 9.31	70.20 ± 9.60	0.000642883
cg04216051	HDAC4	95.18 ± 0.46	95.78 ± 0.40	0.000642971
cg09132607	PLEKHH2;LOC728819	4.54 ± 1.40	5.84 ± 1.79	0.000643385
cg13605615	DIRAS3	45.17 ± 3.09	48.04 ± 2.01	0.000643562
cg00732251	Intergenic	38.45 ± 2.53	41.23 ± 2.82	0.000644136
cg11696576	SLC22A3	77.54 ± 3.61	80.26 ± 2.98	0.000644755
cg15177551	DNAJC15	75.50 ± 2.84	79.50 ± 2.71	0.000645663
cg19989242	WNK2	83.89 ± 2.36	86.59 ± 2.67	0.000647443
cg27238852	CSNK2A2	96.58 ± 0.60	97.55 ± 0.47	0.000647491
cg03585070	ELK4;ELK4	68.77 ± 6.22	75.87 ± 6.62	0.000648015
cg14288890	GALNT9	80.45 ± 5.08	83.90 ± 3.31	0.000648421
cg25330422	STAT3;STAT3;STAT3	93.04 ± 0.96	94.91 ± 1.17	0.000648478
cg07944258	RCHY1;RCHY1;RCHY1	90.43 ± 4.32	92.90 ± 3.26	0.000648884
cg21548869	PACS2;PACS2	94.82 ± 0.77	95.85 ± 0.78	0.000649031
cg06875740	C19orf48;C19orf48;C19orf48;C19orf48	13.18 ± 1.28	11.60 ± 1.53	0.000651009
cg24334381	NGLY1;NGLY1;NGLY1;NGLY1	83.68 ± 3.19	87.76 ± 2.37	0.000651256
cg16278329	SYNGAP1	39.46 ± 5.40	42.96 ± 5.53	0.000651485
cg16456423	FLJ42709;FLJ42709	59.45 ± 3.97	63.77 ± 4.29	0.000651588
cg13917964	GARS	4.05 ± 0.69	4.85 ± 0.65	0.000651589
cg20631351	PALM;PALM	52.40 ± 7.19	56.46 ± 7.06	0.000652111
cg10228629	ATAD3B	3.76 ± 0.58	3.14 ± 0.48	0.000652456
cg17148379	PHF11;PHF11	77.44 ± 1.45	79.26 ± 1.79	0.000652633
cg11843735	CDH3	89.59 ± 2.25	92.02 ± 2.76	0.000652957
cg11952604	ANP32A	5.07 ± 0.57	4.12 ± 0.68	0.00065469
cg02610600	STX1A;STX1A	30.51 ± 5.40	33.57 ± 5.60	0.000655107
cg13936874	DCX;DCX;DCX;DCX	46.47 ± 11.7	53.07 ± 13.4	0.00065518
cg04192740	STK10	58.94 ± 8.77	63.88 ± 8.45	0.000657447
cg00079598	OR6M1	93.79 ± 1.11	94.99 ± 0.85	0.000657781
cg23099740	SLC7A8	70.56 ± 3.30	73.98 ± 2.49	0.000657844
cg17529235	C17orf51	71.30 ± 5.29	74.62 ± 5.87	0.000658033
cg13483502	Intergenic	77.05 ± 3.64	80.69 ± 3.04	0.000658599
cg25710796	APH1B;APH1B	72.58 ± 3.16	76.97 ± 1.99	0.000658882
cg12466599	ALPL;ALPL	75.63 ± 2.99	78.80 ± 3.04	0.000660352
cg24825276	CLIP1;CLIP1	81.92 ± 5.68	85.72 ± 4.87	0.000660745
cg03032497	Intergenic	22.11 ± 5.22	24.41 ± 5.12	0.000661314
cg19995130	Intergenic	70.07 ± 2.93	74.19 ± 2.56	0.000661344
cg23076086	FYN	5.54 ± 0.68	4.49 ± 0.61	0.00066169
cg08824227	Intergenic	52.25 ± 12.9	59.36 ± 11.5	0.000662023
cg18665334	ITM2C;ITM2C;ITM2C	43.68 ± 11.3	49.58 ± 12.3	0.000662396
cg27662530	MARS2	2.61 ± 0.40	2.15 ± 0.37	0.000662714
cg12102320	RRP15	7.76 ± 1.07	8.71 ± 1.19	0.000662752
cg08533865	ENGASE	74.57 ± 15.2	78.63 ± 12.4	0.000662832
cg25806685	LILRA1	74.13 ± 2.13	76.37 ± 2.41	0.000663151
cg09579468	TMEM222	86.71 ± 3.03	89.02 ± 2.95	0.000663239
cg02524754	HSF2BP	75.43 ± 2.89	79.86 ± 2.67	0.000663391
cg04249642	Intergenic	63.14 ± 3.61	69.40 ± 3.51	0.00066397
cg08692198	ZBED4	86.14 ± 3.86	91.21 ± 2.34	0.000664613
cg25641223	PDE10A;PDE10A	72.52 ± 9.55	81.09 ± 10.0	0.000664819
cg18711899	SETD3;CCNK;CCNK;SETD3	4.81 ± 0.55	4.10 ± 0.69	0.000665376
cg00013015	Intergenic	69.37 ± 2.85	71.94 ± 3.34	0.000665864
cg25090569	ADAM19	84.16 ± 2.99	87.83 ± 1.91	0.000665968
cg10000195	Intergenic	68.53 ± 7.70	75.44 ± 7.10	0.000667475
cg18787736	ZNF324B	2.15 ± 0.34	1.91 ± 0.32	0.000667539
cg14645209	C9orf40	5.10 ± 0.87	5.96 ± 1.12	0.000668417
cg03264585	Intergenic	54.56 ± 8.49	57.27 ± 7.86	0.000668884
cg20265043	IGF2BP3	14.20 ± 5.16	16.53 ± 5.68	0.000668982
cg06287665	GRHL2	95.01 ± 1.16	95.86 ± 0.88	0.000669021
cg19516825	Intergenic	95.16 ± 0.87	96.10 ± 0.90	0.000669157
cg20355598	ANKS1A	77.59 ± 4.01	80.03 ± 4.19	0.000669671
cg18515527	Intergenic	86.60 ± 4.40	89.67 ± 3.55	0.0006701
cg02402209	Intergenic	59.04 ± 3.02	64.84 ± 3.71	0.000670241
cg11953079	PRR20E;PRR20D;PRR20C;PRR20B;PRR20A	87.89 ± 2.46	90.08 ± 1.90	0.000670251
cg10208284	ATP11A;ATP11A	83.98 ± 3.66	86.62 ± 3.61	0.000670915
cg10828561	Intergenic	66.20 ± 3.32	69.65 ± 3.39	0.000671246
cg18009359	Intergenic	90.05 ± 1.95	91.74 ± 1.61	0.000671633
cg21225608	DCUN1D4;DCUN1D4	10.39 ± 1.88	8.31 ± 1.52	0.000671721
cg25203980	ACAP3	46.47 ± 11.4	51.49 ± 12.1	0.000671771
cg05582099	CACNA1H;CACNA1H	80.77 ± 6.00	83.54 ± 5.55	0.00067179
cg01852543	FIZ1	85.66 ± 4.10	88.77 ± 2.76	0.000671911
cg12552835	CARM1	62.10 ± 3.79	64.87 ± 4.49	0.000671964
cg02982793	CCDC65	9.43 ± 1.80	10.72 ± 1.81	0.000672196
cg07447015	ANKRD11	91.21 ± 1.16	92.54 ± 1.21	0.000672713
cg13974761	LCE2A	44.84 ± 3.43	47.40 ± 3.22	0.000672933
cg03443944	CAMTA2;CAMTA2;CAMTA2;CAMTA2;SPAG7	52.07 ± 5.72	55.06 ± 6.45	0.000673033
cg02472348	ST8SIA1	10.35 ± 1.18	8.91 ± 0.97	0.000673174
cg05061504	POLR2H	2.58 ± 0.38	2.28 ± 0.24	0.000673964
cg04848823	Intergenic	93.33 ± 2.00	95.49 ± 1.12	0.000674181
cg24950894	LRRK1	61.04 ± 9.27	65.91 ± 9.13	0.000675656
cg07685557	KIAA0182;KIAA0182	62.78 ± 6.18	67.27 ± 6.23	0.000675667
cg25309041	ACSL6;ACSL6	55.16 ± 3.67	57.90 ± 2.72	0.000676096
cg11590420	MYOZ3;MYOZ3	25.23 ± 5.96	30.06 ± 6.95	0.000676242
cg18378955	Intergenic	46.24 ± 10.8	52.61 ± 9.88	0.000677549
cg04211179	ZBTB17	19.66 ± 7.11	22.92 ± 7.09	0.000678095
cg11774921	HRNBP3	47.73 ± 6.96	52.12 ± 7.74	0.000678178
cg15845274	Intergenic	80.73 ± 3.10	86.75 ± 5.22	0.000678789
cg18947305	C1orf101;C1orf101	58.29 ± 2.15	61.38 ± 2.06	0.000679299
cg16704920	SKI	45.49 ± 3.98	47.66 ± 4.20	0.000679501
cg12653105	PLP2;PLP2	19.01 ± 20.3	17.87 ± 19.5	0.00068009
cg10141022	BRAF	5.77 ± 0.71	4.63 ± 0.50	0.000681292
cg25093813	Intergenic	36.85 ± 6.72	39.69 ± 7.17	0.000681333
cg16104837	PSTPIP1	20.40 ± 3.42	23.48 ± 4.22	0.000681497
cg01256882	TERT;TERT	78.61 ± 2.11	80.82 ± 2.56	0.000681865
cg19987349	MATN2;MATN2	61.51 ± 3.31	66.48 ± 1.72	0.000681995
cg07687820	Intergenic	59.81 ± 3.08	65.46 ± 2.63	0.000682033
cg10895032	C6orf134	80.75 ± 2.91	85.70 ± 3.96	0.000682676
cg25618731	TESSP1	25.23 ± 3.30	28.86 ± 4.00	0.000682894
cg01344738	Intergenic	61.66 ± 5.14	65.37 ± 4.76	0.000683885
cg07959490	CCDC57	69.45 ± 3.96	73.61 ± 3.20	0.000684212
cg12190521	Intergenic	73.14 ± 3.58	76.48 ± 3.51	0.000684239
cg11908384	BSX	23.21 ± 6.80	20.15 ± 7.03	0.000684527
cg07747994	Intergenic	96.45 ± 0.77	97.52 ± 0.50	0.00068483
cg23492392	FRMD3	7.75 ± 1.32	6.79 ± 1.12	0.00068494
cg10872521	ERO1L	6.40 ± 0.70	5.32 ± 0.69	0.000685063
cg25382486	Intergenic	79.86 ± 4.63	83.95 ± 3.99	0.000685205
cg13673798	CCDC109A	4.08 ± 0.60	5.53 ± 1.20	0.000685815
cg25759507	DKK3;DKK3;DKK3	95.54 ± 0.84	94.77 ± 1.25	0.000686103
cg18426863	Intergenic	76.48 ± 4.68	79.68 ± 4.43	0.000686123
cg01052087	C20orf94;MKKS	11.82 ± 1.23	9.86 ± 1.14	0.000687148
cg16503724	PLCL2;PLCL2	81.32 ± 6.05	84.53 ± 5.55	0.000688507
cg02321381	OXA1L	8.74 ± 1.46	10.33 ± 1.61	0.000688671
cg27524003	TNXB	67.58 ± 1.95	69.93 ± 1.68	0.000689766
cg19001290	Intergenic	62.39 ± 3.75	65.95 ± 4.12	0.000689992
cg15398976	TRPC4;TRPC4;TRPC4;TRPC4;TRPC4;TRPC4	29.68 ± 2.77	34.48 ± 4.83	0.000691418
cg19656950	Intergenic	60.48 ± 3.88	63.25 ± 3.60	0.000691834
cg22928599	PNMAL2	37.49 ± 3.15	40.21 ± 3.51	0.00069194
cg11592576	CYP8B1;CYP8B1	64.55 ± 3.46	67.14 ± 3.13	0.000692182
cg22718891	Intergenic	15.03 ± 5.06	18.99 ± 5.55	0.000692326
cg25845705	Intergenic	58.46 ± 4.23	61.12 ± 4.53	0.000692621
cg20712968	PRPF18	3.77 ± 0.57	4.73 ± 0.56	0.000692834
cg03611241	TMEM132B	39.17 ± 3.83	42.85 ± 3.47	0.0006942
cg13280914	VWA5B2	64.54 ± 3.29	67.71 ± 4.07	0.000694219
cg10317445	NADK	93.71 ± 1.16	94.95 ± 0.70	0.000694401
cg23610447	Intergenic	59.63 ± 10.5	65.15 ± 10.9	0.000695157
cg11132534	Intergenic	46.35 ± 14.3	54.02 ± 14.7	0.000695399
cg07475954	HAS1	79.25 ± 2.58	81.50 ± 3.13	0.000696022
cg02770724	STX1A;STX1A	54.89 ± 10.5	60.76 ± 10.5	0.000696145
cg18472130	Intergenic	73.34 ± 10.4	78.69 ± 10.1	0.000697812
cg13184019	NOTCH4	62.39 ± 3.48	65.55 ± 3.28	0.000697875
cg13990487	UBR4	75.07 ± 4.39	78.84 ± 4.05	0.000698435
cg26481727	ANKRD11	40.02 ± 11.0	45.60 ± 9.96	0.000698503
cg02372702	CASC1;CASC1;CASC1	47.07 ± 3.82	52.95 ± 6.18	0.000698895
cg13606255	TNXB	55.89 ± 4.13	59.01 ± 3.39	0.000699006
cg02110776	ABR;ABR;ABR	74.50 ± 2.33	77.07 ± 2.28	0.000699047
cg06623827	DRD1;DRD1	9.46 ± 1.72	8.08 ± 1.62	0.000699618
cg02781436	Intergenic	84.01 ± 2.73	87.81 ± 1.65	0.000700538
cg08495456	FZD8	7.18 ± 1.04	6.06 ± 0.67	0.000700846
cg27058582	IQGAP1	97.16 ± 0.55	97.87 ± 0.60	0.000701428
cg24063036	DNAH17	67.87 ± 3.57	71.47 ± 4.68	0.000701462
cg05893876	NOV	4.57 ± 0.79	3.74 ± 0.62	0.00070163
cg07622521	ATOH8	39.83 ± 5.06	43.43 ± 5.18	0.000701944
cg19636308	FLCN;FLCN	66.80 ± 5.50	70.05 ± 3.78	0.000701964
cg15726700	LRRC33	84.86 ± 2.72	87.29 ± 2.17	0.000702123
cg08402734	SNORD37;EEF2	56.13 ± 4.44	59.29 ± 4.23	0.000702424
cg18780243	EEF1DP3	61.05 ± 10.9	67.71 ± 11.3	0.000703822
cg00849368	ARSK;TTC37	6.75 ± 2.09	8.13 ± 2.97	0.000704469
cg23176615	COL23A1	55.82 ± 3.75	59.55 ± 4.04	0.000704642
cg04016744	CTSO	5.62 ± 0.72	4.97 ± 0.72	0.000704717
cg27029018	CSMD1	96.00 ± 0.79	94.65 ± 1.33	0.000705207
cg06636156	MTCH1	76.81 ± 7.91	84.27 ± 4.40	0.000705563
cg06360121	GSTO1	69.92 ± 1.68	72.39 ± 1.95	0.00070718
cg00008647	FAIM3;FAIM3;FAIM3	8.72 ± 1.38	6.87 ± 0.76	0.000707264
cg23058246	GOLGA3	86.24 ± 1.38	88.46 ± 1.91	0.000707361
cg03707967	Intergenic	64.58 ± 3.89	67.58 ± 3.31	0.000707599
cg13948934	MYEOV2;MYEOV2	77.18 ± 4.62	80.76 ± 3.27	0.00070809
cg09030829	Intergenic	91.18 ± 1.53	92.73 ± 1.51	0.000709237
cg19848895	MLL4	68.18 ± 3.43	71.53 ± 3.10	0.000709632
cg16193295	FHOD3	64.40 ± 6.83	69.11 ± 6.68	0.000709873
cg08386009	ATF6B;ATF6B	42.94 ± 4.65	45.36 ± 4.48	0.000710326
cg22887748	ELK1;ELK1	62.67 ± 4.32	65.78 ± 5.32	0.0007107
cg00261144	SEC16A	84.18 ± 3.41	87.59 ± 2.79	0.000710706
cg03522216	GOLPH3	10.37 ± 1.24	8.50 ± 0.89	0.000711729
cg02644889	XIST	92.66 ± 1.50	94.84 ± 1.64	0.000712428
cg24287239	TNFSF11;TNFSF11	8.49 ± 1.89	9.37 ± 1.76	0.000712826
cg00602326	RNASEN;RNASEN	61.11 ± 8.17	65.54 ± 6.93	0.000713152
cg05963821	GAP43;GAP43	4.74 ± 0.97	5.80 ± 1.24	0.000714134
cg06898463	PBLD;PBLD	93.09 ± 1.70	95.12 ± 1.53	0.000714466
cg02593884	FLYWCH1;FLYWCH1	68.87 ± 3.13	71.90 ± 3.18	0.00071457
cg19081751	Intergenic	77.60 ± 2.84	80.84 ± 2.44	0.000714871
cg02713851	OSBP	3.07 ± 0.48	2.54 ± 0.42	0.000715257
cg08329597	LOC149837	55.36 ± 5.22	59.10 ± 4.51	0.000715282
cg17969789	SLC12A7	80.26 ± 5.21	83.91 ± 3.60	0.000715465
cg08089364	Intergenic	69.19 ± 4.28	74.15 ± 4.04	0.000715779
cg13321166	MS4A3;MS4A3;MS4A3	70.58 ± 4.84	74.25 ± 3.85	0.00071626
cg01385669	Intergenic	64.90 ± 7.74	69.55 ± 8.12	0.000716713
cg05650458	ARF1;ARF1;ARF1;ARF1	4.93 ± 0.33	4.20 ± 0.44	0.000716849
cg07185165	APLP1;APLP1	84.68 ± 2.52	87.41 ± 2.63	0.00071708
cg17472714	Intergenic	79.79 ± 2.21	81.22 ± 2.38	0.000717453
cg06952873	ZSCAN12L1	52.65 ± 5.81	57.41 ± 7.06	0.000718514
cg02575483	DCBLD1	47.68 ± 12.7	54.66 ± 14.0	0.000718704
cg02513409	Intergenic	3.98 ± 0.85	3.46 ± 0.76	0.000718823
cg00290218	TMEM211	86.80 ± 2.90	88.03 ± 2.88	0.00071958
cg04944283	ZNF311	78.94 ± 3.38	81.63 ± 3.15	0.00071994
cg02035605	WNT5B	93.56 ± 1.30	94.85 ± 1.25	0.000720468
cg21446514	Intergenic	77.10 ± 2.86	79.37 ± 2.55	0.000720774
cg14788673	FGGY;FGGY	64.30 ± 4.18	67.83 ± 3.72	0.00072087
cg07178825	TP73;TP73;TP73;TP73	23.09 ± 4.89	25.83 ± 5.40	0.000721018
cg24296621	Intergenic	54.51 ± 1.81	56.43 ± 1.19	0.00072122
cg10127554	PRKAR1B;PRKAR1B;PRKAR1B;PRKAR1B;PRKAR1B;PRKAR1B	63.16 ± 10.5	68.16 ± 9.71	0.000722315
cg05019568	Intergenic	90.33 ± 2.33	93.36 ± 1.67	0.000722483
cg23494026	NFKBID	51.75 ± 5.58	55.64 ± 4.48	0.00072273
cg02703787	Intergenic	34.41 ± 4.07	38.93 ± 2.84	0.000722762
cg12555844	PARVG;PARVG	69.07 ± 7.81	71.60 ± 7.09	0.000723043
cg03919650	MEFV	52.68 ± 3.31	55.39 ± 3.00	0.000723277
cg13728069	NELF;NELF;NELF;NELF	67.19 ± 4.26	71.78 ± 2.62	0.000724472
cg23309670	CPNE5	60.25 ± 10.1	65.64 ± 9.12	0.000724641
cg01333532	PHLPP2	81.09 ± 2.69	85.27 ± 2.24	0.000724733
cg02267408	Intergenic	17.52 ± 4.97	20.01 ± 4.11	0.00072496
cg27587063	KIAA1751	68.36 ± 5.36	72.19 ± 4.89	0.000725358
cg18699226	PDE1C	90.47 ± 2.36	93.53 ± 1.71	0.000726452
cg21046959	FLJ22536	85.39 ± 1.55	87.33 ± 1.35	0.000726892
cg02278114	KLK5;KLK5;KLK5	70.89 ± 3.76	73.86 ± 3.52	0.00072727
cg06460013	CCDC78;HAGHL	63.09 ± 2.89	65.14 ± 2.63	0.000729332
cg09182733	Intergenic	74.09 ± 25.6	76.01 ± 24.7	0.000730063
cg05803790	Intergenic	90.36 ± 2.63	87.04 ± 2.25	0.000730118
cg15616511	CRY2;CRY2	49.08 ± 5.13	52.11 ± 5.14	0.000730165
cg01631064	Intergenic	63.01 ± 3.72	66.13 ± 3.31	0.000730223
cg20550458	SNORA52;RPLP2	42.89 ± 2.82	45.09 ± 3.09	0.000730609
cg10626209	ZNF792	3.22 ± 0.27	2.87 ± 0.26	0.000731994
cg25092915	Intergenic	55.29 ± 3.85	57.44 ± 3.41	0.000732077
cg23781997	LOC339240	83.24 ± 2.18	86.09 ± 2.73	0.000732128
cg11367580	ARPC3	6.67 ± 0.77	5.49 ± 0.46	0.000732665
cg05441039	CHMP1A;CHMP1A;C16orf55	10.54 ± 1.83	12.13 ± 2.06	0.000733028
cg06900355	Intergenic	64.07 ± 11.3	67.28 ± 11.1	0.000733349
cg01444808	SEPT8;SEPT8;SEPT8;SEPT8	56.80 ± 3.84	59.69 ± 4.07	0.00073406
cg24850139	Intergenic	60.58 ± 2.86	63.37 ± 2.01	0.000734689
cg18241647	WFDC12	93.06 ± 0.49	94.12 ± 0.70	0.000735503
cg04229851	PSAPL1;PSAPL1;SORCS2	59.24 ± 3.69	62.22 ± 3.47	0.000736779
cg02593227	GPC1	70.08 ± 4.61	74.16 ± 3.87	0.00073713
cg10450178	WDR51B	3.00 ± 0.65	3.81 ± 0.76	0.000737907
cg25734279	FAM131A;FAM131A	57.36 ± 7.03	61.77 ± 8.38	0.000738575
cg14818866	TMEM161A	90.53 ± 0.99	91.93 ± 0.72	0.000738873
cg15557758	Intergenic	53.24 ± 2.17	55.45 ± 2.23	0.000739405
cg14623306	TLE1	41.52 ± 9.72	47.34 ± 10.4	0.000739892
cg05120309	Intergenic	73.71 ± 10.8	79.32 ± 9.69	0.0007399
cg16910238	UBE2U	94.72 ± 1.01	96.01 ± 1.06	0.000739902
cg00021242	FAM189A1	92.08 ± 2.46	93.84 ± 1.55	0.000739937
cg10939579	GJB2	23.62 ± 3.98	28.71 ± 4.43	0.000740237
cg05735180	Intergenic	22.03 ± 9.90	29.46 ± 10.9	0.000740682
cg24250234	Intergenic	57.81 ± 8.26	62.59 ± 8.48	0.000741585
cg12633766	Intergenic	87.21 ± 1.78	89.60 ± 1.21	0.000741944
cg24877510	Intergenic	28.23 ± 4.90	33.91 ± 6.55	0.000741951
cg25943118	Intergenic	26.36 ± 11.6	34.36 ± 13.6	0.000742188
cg25693265	KDELR2;KDELR2	87.54 ± 3.49	89.40 ± 3.07	0.000742323
cg23035923	CRYBB2	67.80 ± 2.72	70.68 ± 1.64	0.000743577
cg09866275	VAT1L	27.26 ± 7.78	32.42 ± 9.42	0.000744468
cg01557792	KIAA0247	26.66 ± 9.69	31.62 ± 9.41	0.000745079
cg09907201	MMP19	71.96 ± 2.44	75.22 ± 2.62	0.00074587
cg14504269	Intergenic	19.11 ± 6.97	22.14 ± 7.58	0.000745948
cg24917527	FZD2	2.78 ± 0.51	2.28 ± 0.22	0.000746201
cg09861240	SH3BP1	63.73 ± 3.69	67.86 ± 5.14	0.000746398
cg05410536	GALNTL1;GALNTL1	62.29 ± 8.70	67.08 ± 5.89	0.000746503
cg24332685	BAT1;BAT1	19.51 ± 5.97	23.95 ± 6.65	0.000746888
cg13529101	CUX1;CUX1;CUX1	92.11 ± 1.76	93.92 ± 1.12	0.000747117
cg27057027	Intergenic	26.32 ± 5.89	29.42 ± 4.37	0.000748303
cg02016723	WFDC5	61.03 ± 2.34	64.10 ± 2.63	0.000748577
cg24028809	RGS17	47.13 ± 14.9	54.46 ± 15.1	0.000749193
cg09379385	HIST1H2AI	10.85 ± 2.64	13.09 ± 2.89	0.000749289
cg00447574	Intergenic	86.25 ± 2.85	88.19 ± 2.77	0.000749476
cg15390816	NCOR2;NCOR2	81.25 ± 5.70	83.83 ± 5.90	0.000750216
cg02972475	ZNF362	85.99 ± 2.46	89.17 ± 1.22	0.000750294
cg20254361	MYOM3	53.21 ± 7.50	56.37 ± 6.28	0.000750743
cg16627211	AP3S1	79.78 ± 4.31	84.03 ± 2.61	0.000752677
cg24951754	Intergenic	48.17 ± 5.62	51.40 ± 5.74	0.000752681
cg13866688	Intergenic	55.10 ± 10.8	60.67 ± 11.2	0.000752761
cg07021288	Intergenic	45.11 ± 4.23	49.40 ± 5.83	0.000753049
cg07006818	LMTK2	94.46 ± 1.10	95.91 ± 1.11	0.000753509
cg23278066	C11orf73;C11orf73;C11orf73;C11orf73	3.93 ± 0.69	4.83 ± 0.97	0.000754584
cg12944343	Intergenic	41.10 ± 8.00	46.11 ± 7.72	0.000754887
cg15646626	MCPH1	94.86 ± 0.74	96.06 ± 0.64	0.000755246
cg14829516	THRA;NR1D1	86.46 ± 4.24	89.30 ± 3.93	0.000755883
cg20789620	FSD1	42.14 ± 3.86	44.89 ± 3.53	0.000756091
cg15262728	ITM2C;ITM2C;ITM2C	87.51 ± 4.82	90.20 ± 4.68	0.000756436
cg02224047	CUX1;CUX1;CUX1	73.16 ± 3.16	76.50 ± 1.60	0.00075658
cg15649760	Intergenic	79.28 ± 3.31	82.42 ± 3.17	0.000756849
cg16474643	ATP11A;ATP11A	86.94 ± 2.21	89.06 ± 1.65	0.00075757
cg05673966	Intergenic	56.23 ± 8.88	62.98 ± 9.81	0.000757578
cg25754228	DPAGT1	5.75 ± 0.61	4.66 ± 0.83	0.000758226
cg18462653	DEFB119;DEFB119;DEFB119	47.94 ± 4.77	50.82 ± 4.94	0.000758544
cg00818822	RFX2;RFX2	90.14 ± 2.10	91.98 ± 1.38	0.000758776
cg19601664	Intergenic	95.39 ± 0.83	96.37 ± 0.87	0.00075913
cg15988232	CSPG5	45.48 ± 2.88	47.45 ± 3.07	0.000759447
cg14750475	RRAS	53.66 ± 5.99	57.34 ± 6.47	0.000759744
cg13128117	PPP1R1A	60.22 ± 6.30	64.73 ± 5.72	0.000760045
cg09381003	SHKBP1;SPTBN4	23.89 ± 3.53	26.19 ± 3.13	0.000760178
cg01255509	CARD14;CARD14	91.82 ± 1.20	93.22 ± 0.90	0.000760286
cg08858669	SDR42E1	85.35 ± 2.16	87.40 ± 1.15	0.000760305
cg03885646	SSR3	28.97 ± 5.73	33.05 ± 5.36	0.00076048
cg06095560	SAE1;SAE1;SAE1;SAE1	2.39 ± 0.45	2.96 ± 0.33	0.000760539
cg16181848	EMILIN2	95.95 ± 0.62	96.58 ± 0.45	0.000760611
cg23100591	Intergenic	59.72 ± 3.73	64.66 ± 2.59	0.000761069
cg13545297	HOXC8	41.22 ± 6.76	44.70 ± 7.00	0.000761353
cg00925020	GNG7	2.29 ± 0.26	2.85 ± 0.24	0.000761861
cg11685134	Intergenic	63.47 ± 4.86	66.12 ± 4.24	0.000761979
cg05300029	Intergenic	69.73 ± 4.05	73.22 ± 5.71	0.000761985
cg10144483	Intergenic	16.32 ± 2.93	19.43 ± 3.67	0.000762194
cg11504739	SCGB1A1	71.96 ± 5.66	75.79 ± 5.89	0.000762255
cg23264763	MAGI2	92.68 ± 3.09	95.09 ± 2.22	0.000762279
cg05088704	TXNDC3	85.60 ± 4.05	90.86 ± 2.37	0.000762629
cg17450815	ZNF740	19.89 ± 3.40	21.26 ± 3.05	0.000763192
cg25076324	PIWIL2;PIWIL2	82.76 ± 5.14	86.00 ± 3.82	0.000763431
cg27519016	TFDP1;TFDP1	88.02 ± 2.64	90.64 ± 2.16	0.000763718
cg07394411	NOL10	66.43 ± 3.87	69.60 ± 2.92	0.000763981
cg07178969	Intergenic	31.74 ± 5.19	36.12 ± 5.20	0.000764179
cg10822582	TMEM168	13.03 ± 7.46	16.59 ± 9.22	0.000764547
cg21265278	TOR3A	50.37 ± 10.2	55.83 ± 11.8	0.00076485
cg05471521	CSTF1;AURKA;AURKA;CSTF1;CSTF1;AURKA;AURKA;AURKA;AURKA	20.06 ± 3.64	23.64 ± 4.24	0.000765257
cg13454199	Intergenic	76.05 ± 5.43	79.53 ± 5.67	0.000765333
cg05975021	ARHGAP6;AMELX;AMELX;AMELX;ARHGAP6	86.22 ± 14.0	87.94 ± 12.5	0.000765375
cg16588649	NFIC;NFIC	86.48 ± 3.37	88.91 ± 2.82	0.000765743
cg14924278	TACC2;TACC2;TACC2;TACC2	89.05 ± 2.57	91.37 ± 1.84	0.000766042
cg26606327	ARPC1B	6.71 ± 1.05	5.70 ± 0.68	0.000766737
cg11645724	KDM4B	67.40 ± 2.65	71.19 ± 2.92	0.000767028
cg27095035	SPATA20	68.15 ± 3.58	70.95 ± 3.96	0.000767431
cg20672819	PDRG1	69.18 ± 3.40	72.10 ± 4.19	0.000768047
cg02516456	MUC6	62.03 ± 5.44	65.93 ± 6.33	0.000769967
cg01345087	SYN1;SYN1;SYN1;SYN1	18.86 ± 20.9	17.71 ± 20.1	0.000770141
cg01581018	ZIC4;ZIC4;ZIC4;ZIC4;ZIC4	14.99 ± 1.78	17.61 ± 1.89	0.000770304
cg13951190	DENND1A	45.33 ± 4.06	50.35 ± 4.47	0.000770309
cg07951921	BEND2	56.89 ± 6.89	63.14 ± 4.05	0.000770894
cg00941912	KIAA1530	60.63 ± 2.51	64.43 ± 2.34	0.000771038
cg07683276	C6orf94;LTV1	61.78 ± 5.57	66.64 ± 5.17	0.000771045
cg05619712	CRYGC	92.77 ± 1.45	93.98 ± 1.56	0.000771685
cg15626105	ABI3BP	21.57 ± 7.00	27.60 ± 8.52	0.000771797
cg05712524	Intergenic	34.24 ± 3.28	36.29 ± 3.56	0.000771869
cg26915318	ZNF423	94.68 ± 0.92	95.45 ± 1.04	0.000771965
cg08743751	MAST4;MAST4	33.80 ± 3.83	36.76 ± 3.17	0.000771993
cg15789789	TMEM184B	64.91 ± 8.36	70.16 ± 8.76	0.000772979
cg10303653	TNXB	55.50 ± 2.92	57.79 ± 3.49	0.000773395
cg24333596	HDAC4	93.50 ± 1.07	94.42 ± 0.85	0.000775501
cg22760420	AARS2	73.77 ± 4.56	78.27 ± 2.05	0.00077568
cg15164881	TSPAN4;TSPAN4;TSPAN4;TSPAN4;TSPAN4;TSPAN4;TSPAN4	72.96 ± 5.99	79.94 ± 6.60	0.00077698
cg25361961	Intergenic	45.56 ± 5.77	48.91 ± 6.26	0.000778061
cg18011760	Intergenic	94.91 ± 1.25	95.77 ± 1.44	0.000778085
cg11572675	Intergenic	85.65 ± 1.68	87.59 ± 1.89	0.000778299
cg07878514	INSM1;INSM1	20.27 ± 9.17	24.79 ± 10.3	0.000778391
cg20894145	Intergenic	89.21 ± 1.48	91.07 ± 1.09	0.000778415
cg00038020	Intergenic	54.11 ± 9.12	59.99 ± 8.47	0.000779787
cg20293685	CUL2	92.05 ± 1.19	90.44 ± 1.22	0.000779963
cg09370277	SNORD116-2;SNORD116-6	49.32 ± 2.10	52.01 ± 1.93	0.000780616
cg25194273	HNRNPA1L2;HNRNPA1L2	4.24 ± 0.58	4.94 ± 0.41	0.000780663
cg09944400	TMCC3	34.56 ± 8.12	40.42 ± 9.16	0.00078095
cg27552857	SEMA6B	69.13 ± 2.91	72.50 ± 3.44	0.000781657
cg13135887	Intergenic	92.23 ± 1.87	94.66 ± 1.12	0.000782578
cg01919034	Intergenic	60.15 ± 4.06	64.46 ± 2.28	0.000782864
cg13234675	KCNH6;KCNH6	91.68 ± 2.14	92.94 ± 2.05	0.000784658
cg08617020	SLC7A5	69.00 ± 11.0	74.40 ± 9.70	0.000785647
cg23024254	Intergenic	80.57 ± 1.23	83.30 ± 1.50	0.000785733
cg07436694	METTL9;METTL9	55.88 ± 15.9	64.31 ± 14.4	0.000785922
cg27628891	C2orf85	92.45 ± 2.18	93.85 ± 1.89	0.000786813
cg18978643	Intergenic	94.69 ± 1.18	96.13 ± 0.93	0.000786855
cg00056433	Intergenic	27.94 ± 7.30	32.88 ± 9.50	0.000787643
cg06672250	EPB49;EPB49;EPB49;EPB49	55.71 ± 12.0	61.72 ± 12.3	0.000788752
cg06731904	EIF2AK1;EIF2AK1	75.30 ± 4.71	78.83 ± 3.98	0.000788931
cg25653223	Intergenic	24.37 ± 3.32	27.69 ± 4.26	0.000788984
cg09828265	ITGA9	50.46 ± 3.08	52.81 ± 3.15	0.000789436
cg09671611	GPR114	66.92 ± 1.88	69.88 ± 1.99	0.000789584
cg08748884	Intergenic	86.18 ± 2.09	89.04 ± 1.65	0.00079014
cg25711358	ALOX12B	17.13 ± 2.49	16.02 ± 2.02	0.000790457
cg02802391	HMGA2	29.50 ± 6.45	35.62 ± 8.61	0.000790745
cg20076659	NRXN3;NRXN3;NRXN3	25.08 ± 14.2	30.73 ± 15.5	0.000790763
cg21419383	IVL	84.69 ± 5.52	86.82 ± 4.43	0.000790981
cg17096807	NOP2;NOP2	50.65 ± 5.68	55.97 ± 6.56	0.000791157
cg14855292	FAM110A;FAM110A;FAM110A;FAM110A	19.48 ± 6.96	23.36 ± 9.27	0.000791757
cg26208267	Intergenic	62.68 ± 6.35	65.50 ± 6.44	0.000791836
cg16117757	IL28RA;IL28RA;IL28RA	80.24 ± 8.06	74.35 ± 9.35	0.000792142
cg16465939	KCNQ1;KCNQ1	37.90 ± 5.31	42.19 ± 6.36	0.000793375
cg17087314	Intergenic	57.69 ± 3.05	60.68 ± 4.49	0.00079351
cg01102826	Intergenic	66.23 ± 3.89	70.58 ± 3.77	0.000794141
cg24862851	FAM9A;FAM9A;FAM9A	92.17 ± 2.55	93.41 ± 2.39	0.000794285
cg08946713	STAT1;STAT1	26.58 ± 11.2	31.67 ± 12.3	0.000794542
cg19166242	Intergenic	64.10 ± 3.06	68.71 ± 2.41	0.000795094
cg04062104	Intergenic	58.58 ± 1.97	61.76 ± 2.56	0.000795424
cg13843417	TOLLIP	78.73 ± 3.84	81.03 ± 3.60	0.000795442
cg26456435	Intergenic	44.26 ± 3.23	47.53 ± 4.58	0.000795614
cg23786580	HECW1	74.43 ± 4.51	77.29 ± 3.29	0.000796315
cg15849060	ALDH3A1;ALDH3A1;ALDH3A1	87.73 ± 8.13	82.37 ± 9.29	0.000797657
cg18122215	MEG8	64.63 ± 10.8	69.50 ± 10.3	0.000797765
cg25493948	FMN1	27.09 ± 7.72	32.41 ± 8.75	0.000797866
cg19788727	NTN1	75.10 ± 9.96	79.83 ± 9.53	0.000797915
cg27240020	FARP1;FARP1	4.26 ± 0.74	3.55 ± 0.46	0.000799102
cg23334264	TEX101;TEX101	66.42 ± 2.66	68.32 ± 2.13	0.000799566
cg04529406	Intergenic	38.71 ± 10.2	44.54 ± 9.68	0.000801319
cg24136671	Intergenic	52.47 ± 6.96	55.93 ± 7.44	0.000802037
[truncated: 60,178 more rows]
