# Supplementary material for: Glucolipotoxicity Alters Insulin Secretion via Epigenetic Changes in Human Islets
Source: Oxford University Press journal article supplement (doi:10.2337/db18-0900), 2019-08-16
Supplement: db180900supplementarydata7.xlsx [file db180900supplementarydata7.xlsx]

## Sheet: merged_mrna_expression_and_dna_
Supplementary Table 6. Genes exhibiting both altered expression (q<0.05) and DNA methylation (p<0.05) in human islets after treatment with high levels of palmitate and glucose
*Some genes have more than one significant CpG site
**Some CpG sites are annotated to more than one gene
mRNA expression					DNA methylation
Gene symbol*	Control (mean ± SD)	High glucose and palmitate (mean ± SD)	p-value	q-value	TargetID**	% Methylation Control (mean ± SD)	% Methylation High glcuose and palmitate (mean ± SD)	p-value
AAK1	189.02 ± 25.35	221.06 ± 34.03	0.003	0.0386	cg21174435	4.94 ± 0.78	5.83 ± 0.44	0.00354
AAK1	189.02 ± 25.35	221.06 ± 34.03	0.003	0.0386	cg22059413	56.57 ± 9.8	53.25 ± 11.46	0.0383
AAK1	189.02 ± 25.35	221.06 ± 34.03	0.003	0.0386	cg01604601	90.46 ± 2.28	91.81 ± 2.27	0.0427
ABCD3	1915.06 ± 216.88	1725.52 ± 230.95	0.00312	0.0396	cg03064968	3.53 ± 0.36	3.9 ± 0.36	0.0107
ABHD2	1119.73 ± 193.96	930.4 ± 130.46	0.000612	0.0163	cg24109852	3.46 ± 0.9	2.76 ± 0.37	0.0155
ABHD2	1119.73 ± 193.96	930.4 ± 130.46	0.000612	0.0163	cg23124613	46.06 ± 12.81	50.92 ± 12.66	0.0398
ABHD2	1119.73 ± 193.96	930.4 ± 130.46	0.000612	0.0163	cg24589444	3.24 ± 0.53	3.72 ± 0.62	0.0425
ABHD2	1119.73 ± 193.96	930.4 ± 130.46	0.000612	0.0163	cg21273125	5.55 ± 0.88	4.94 ± 0.7	0.0458
ACAD8	145.21 ± 15.62	126.77 ± 11.57	0.00116	0.023	cg20307448	90.56 ± 1.28	91.46 ± 1.06	0.022
ACAD8	145.21 ± 15.62	126.77 ± 11.57	0.00116	0.023	cg21759430	95.35 ± 0.7	96.18 ± 1.15	0.0335
ACAD8	145.21 ± 15.62	126.77 ± 11.57	0.00116	0.023	cg19037107	91.56 ± 1.16	92.76 ± 1.34	0.046
ACE2	95.75 ± 43.5	52.4 ± 15.22	9.87e-05	0.00672	cg21598868	87.39 ± 9.2	89.29 ± 8.89	0.0128
ACLY	2079.58 ± 722.9	2689.03 ± 1025.45	0.000596	0.0161	cg03950716	57.68 ± 15.94	63.76 ± 17.39	0.00577
ACLY	2079.58 ± 722.9	2689.03 ± 1025.45	0.000596	0.0161	cg11610739	2.65 ± 0.45	2.31 ± 0.28	0.0282
ACO1	1279.16 ± 125.46	1152.43 ± 134.41	0.00335	0.0413	cg14237843	3.91 ± 0.34	3.36 ± 0.45	0.00551
ACO1	1279.16 ± 125.46	1152.43 ± 134.41	0.00335	0.0413	cg14296220	97.16 ± 0.64	96.62 ± 0.61	0.0388
ACO1	1279.16 ± 125.46	1152.43 ± 134.41	0.00335	0.0413	cg13977526	6.78 ± 1.4	7.82 ± 1.45	0.0474
ACO1	1279.16 ± 125.46	1152.43 ± 134.41	0.00335	0.0413	cg13567378	94.32 ± 0.84	94.73 ± 0.98	0.0477
ACOT13	525.77 ± 82.78	572.9 ± 92.99	0.00278	0.037	cg26842743	2.59 ± 0.53	2.11 ± 0.3	0.00922
ACOT13	525.77 ± 82.78	572.9 ± 92.99	0.00278	0.037	cg22475952	96.88 ± 0.74	96.15 ± 0.64	0.0205
ACP5	226.16 ± 96.91	163.09 ± 57.95	0.00121	0.0236	cg26570683	44.96 ± 1.88	46.3 ± 2.25	0.00526
ACP5	226.16 ± 96.91	163.09 ± 57.95	0.00121	0.0236	cg17658002	93.57 ± 1.49	94.9 ± 1.69	0.0162
ACSF2	75.68 ± 25.48	61.85 ± 23.75	0.00137	0.0253	cg06818777	25.31 ± 9.78	27.76 ± 10.27	0.0198
ACSF2	75.68 ± 25.48	61.85 ± 23.75	0.00137	0.0253	cg05346527	69.15 ± 5.19	71.46 ± 6.38	0.0216
ACSF2	75.68 ± 25.48	61.85 ± 23.75	0.00137	0.0253	cg19046826	38.27 ± 9.45	40.87 ± 8.74	0.0306
ACSF2	75.68 ± 25.48	61.85 ± 23.75	0.00137	0.0253	cg17890928	22.88 ± 10.06	25.27 ± 9.93	0.0341
ACSF2	75.68 ± 25.48	61.85 ± 23.75	0.00137	0.0253	cg05180443	29.31 ± 11.63	31.01 ± 10.9	0.0389
ACSF2	75.68 ± 25.48	61.85 ± 23.75	0.00137	0.0253	cg18038894	73.79 ± 7.58	69.92 ± 9.03	0.0451
ACSF2	75.68 ± 25.48	61.85 ± 23.75	0.00137	0.0253	cg22627841	42.42 ± 9.58	44.63 ± 9.41	0.0462
ACSF2	75.68 ± 25.48	61.85 ± 23.75	0.00137	0.0253	cg15880760	38.23 ± 8.75	40.1 ± 8.63	0.0474
ACSL1	720.57 ± 155.02	923.34 ± 230.32	0.000299	0.0114	cg00287477	52.06 ± 6.26	54.44 ± 4.73	0.0174
ACSL1	720.57 ± 155.02	923.34 ± 230.32	0.000299	0.0114	cg03977443	82.52 ± 4.07	84.55 ± 4.66	0.0185
ACSL1	720.57 ± 155.02	923.34 ± 230.32	0.000299	0.0114	cg00372249	86.33 ± 2.19	88.44 ± 3.81	0.0221
ACSL1	720.57 ± 155.02	923.34 ± 230.32	0.000299	0.0114	cg27571769	56.76 ± 8.22	59.6 ± 10.42	0.0331
ACSL1	720.57 ± 155.02	923.34 ± 230.32	0.000299	0.0114	cg16092956	5.36 ± 0.71	4.79 ± 0.58	0.0404
ACSS3	141.62 ± 57.88	106.96 ± 49.69	0.00079	0.0187	cg10789281	3.13 ± 0.66	2.5 ± 0.58	0.000128
ACSS3	141.62 ± 57.88	106.96 ± 49.69	0.00079	0.0187	cg19981475	51.84 ± 14.77	60.1 ± 15.16	0.00533
ACSS3	141.62 ± 57.88	106.96 ± 49.69	0.00079	0.0187	cg00814614	54.86 ± 14.71	62.94 ± 16.16	0.0106
ACSS3	141.62 ± 57.88	106.96 ± 49.69	0.00079	0.0187	cg26461449	63.81 ± 4.62	68.14 ± 3.66	0.0188
ACTA2	182.31 ± 94.66	136.13 ± 62.78	0.00353	0.0422	cg03672854	6.35 ± 0.71	5.8 ± 1.2	0.046
ACTB	5503.07 ± 517.84	5130.41 ± 425.47	0.00118	0.0233	cg14145074	29.23 ± 6.75	32.2 ± 7.1	0.00337
ACTB	5503.07 ± 517.84	5130.41 ± 425.47	0.00118	0.0233	cg01741041	32.19 ± 5.41	33.93 ± 5.33	0.0244
ACTB	5503.07 ± 517.84	5130.41 ± 425.47	0.00118	0.0233	cg26636061	61.58 ± 2.81	63.27 ± 3.06	0.0248
ACTN4	2694.21 ± 513.38	2437.06 ± 428.44	0.00287	0.0376	cg12955895	8.8 ± 1.16	7.8 ± 0.72	0.012
ACTN4	2694.21 ± 513.38	2437.06 ± 428.44	0.00287	0.0376	cg27548256	79.16 ± 3.46	81.11 ± 2.86	0.0399
ACTN4	2694.21 ± 513.38	2437.06 ± 428.44	0.00287	0.0376	cg13711528	9.39 ± 1.85	8.14 ± 1.35	0.0437
ACTN4	2694.21 ± 513.38	2437.06 ± 428.44	0.00287	0.0376	cg24034465	93.96 ± 1.51	94.74 ± 1.44	0.0441
ACVR1B	287.77 ± 35.3	258.46 ± 35.91	0.00245	0.0344	cg09039672	33.31 ± 8.07	36.71 ± 8.33	0.00948
ACVR1B	287.77 ± 35.3	258.46 ± 35.91	0.00245	0.0344	cg17516106	91.76 ± 1.44	93.11 ± 0.97	0.00985
ACVR1B	287.77 ± 35.3	258.46 ± 35.91	0.00245	0.0344	cg24433265	56.62 ± 11.98	62.72 ± 12.52	0.0103
ACVR1B	287.77 ± 35.3	258.46 ± 35.91	0.00245	0.0344	cg14378593	7.46 ± 0.75	6.66 ± 0.67	0.0316
ACVR1B	287.77 ± 35.3	258.46 ± 35.91	0.00245	0.0344	cg05940536	2.66 ± 0.65	3.15 ± 0.79	0.0437
ACVRL1	89.33 ± 11.12	78.55 ± 12.5	0.000575	0.0158	cg14872074	76.78 ± 4.18	79.67 ± 2.03	0.00313
ADAM10	1938.37 ± 239.31	1753.42 ± 198.71	0.00025	0.0104	cg02539984	94.02 ± 1.83	95.22 ± 1.49	0.0253
ADAM10	1938.37 ± 239.31	1753.42 ± 198.71	0.00025	0.0104	cg08898775	38.84 ± 8.62	41.66 ± 10.64	0.0409
ADAM10	1938.37 ± 239.31	1753.42 ± 198.71	0.00025	0.0104	cg02971627	2.73 ± 0.59	2.47 ± 0.46	0.0492
ADAM19	46.08 ± 8.77	39.24 ± 5.07	0.000499	0.0147	cg25090569	84.17 ± 2.99	87.84 ± 1.91	0.000666
ADAM19	46.08 ± 8.77	39.24 ± 5.07	0.000499	0.0147	cg07257747	64.15 ± 4.75	68.57 ± 5.97	0.0186
ADAM19	46.08 ± 8.77	39.24 ± 5.07	0.000499	0.0147	cg09648467	27.31 ± 4.6	30.36 ± 5.59	0.0194
ADAM28	96.64 ± 48.37	69.29 ± 27.84	0.00165	0.0281	cg16767652	67.2 ± 7.3	73.17 ± 6.52	0.0042
ADAM9	3380.18 ± 593.57	2984.52 ± 665.67	0.00229	0.0331	cg15460330	7.04 ± 1.16	8.26 ± 1.38	0.012
ADAM9	3380.18 ± 593.57	2984.52 ± 665.67	0.00229	0.0331	cg06800444	4.93 ± 0.9	4.16 ± 0.74	0.0153
ADAM9	3380.18 ± 593.57	2984.52 ± 665.67	0.00229	0.0331	cg00687766	5.65 ± 1.1	4.74 ± 0.89	0.0221
ADAM9	3380.18 ± 593.57	2984.52 ± 665.67	0.00229	0.0331	cg21235903	94.93 ± 1.13	95.81 ± 1.2	0.0402
ADAM9	3380.18 ± 593.57	2984.52 ± 665.67	0.00229	0.0331	cg09321684	92.42 ± 5.92	90.56 ± 6.15	0.0437
ADAM9	3380.18 ± 593.57	2984.52 ± 665.67	0.00229	0.0331	cg16652639	2.72 ± 0.98	2.24 ± 0.45	0.0494
ADAMTS12	163.02 ± 84.24	114.85 ± 63.67	1.39e-07	0.00102	cg23359363	94.45 ± 0.7	95.3 ± 0.64	0.0152
ADAMTS12	163.02 ± 84.24	114.85 ± 63.67	1.39e-07	0.00102	cg26077446	76.24 ± 4.96	79.24 ± 3.74	0.0196
ADAMTS12	163.02 ± 84.24	114.85 ± 63.67	1.39e-07	0.00102	cg08768395	56.46 ± 3.89	59.58 ± 4.12	0.0256
ADAMTS12	163.02 ± 84.24	114.85 ± 63.67	1.39e-07	0.00102	cg09747891	33.88 ± 10.36	30.68 ± 11.47	0.0271
ADAMTS12	163.02 ± 84.24	114.85 ± 63.67	1.39e-07	0.00102	cg10594543	95.06 ± 0.94	95.71 ± 0.45	0.0358
ADAMTS5	42.93 ± 8.13	63.48 ± 18.42	4.89e-05	0.00511	cg18895813	10.27 ± 1.92	11.78 ± 1.88	0.00222
ADAMTS5	42.93 ± 8.13	63.48 ± 18.42	4.89e-05	0.00511	cg07771160	65.45 ± 4.96	70.93 ± 5.95	0.00369
ADAMTS5	42.93 ± 8.13	63.48 ± 18.42	4.89e-05	0.00511	cg08979041	28.67 ± 4.84	31.73 ± 4.25	0.0048
ADAMTS5	42.93 ± 8.13	63.48 ± 18.42	4.89e-05	0.00511	cg14740657	54.72 ± 4.72	56.78 ± 5.25	0.0191
ADAMTS5	42.93 ± 8.13	63.48 ± 18.42	4.89e-05	0.00511	cg08190291	3.28 ± 0.49	3.64 ± 0.52	0.0388
ADAMTS5	42.93 ± 8.13	63.48 ± 18.42	4.89e-05	0.00511	cg00646084	89.5 ± 3.7	91.29 ± 2.86	0.046
ADCY2	75.59 ± 10.11	113.58 ± 29.67	0.000608	0.0163	cg05921947	71.41 ± 4.43	77.37 ± 4.12	0.00115
ADCY2	75.59 ± 10.11	113.58 ± 29.67	0.000608	0.0163	cg10453337	91.14 ± 3.59	89.21 ± 3.77	0.00817
ADCY2	75.59 ± 10.11	113.58 ± 29.67	0.000608	0.0163	cg12378867	86.77 ± 2.32	88.44 ± 2.52	0.0226
ADCY2	75.59 ± 10.11	113.58 ± 29.67	0.000608	0.0163	cg19902246	87.8 ± 2.26	90.03 ± 2.39	0.0248
ADCY2	75.59 ± 10.11	113.58 ± 29.67	0.000608	0.0163	cg07176385	59.97 ± 5.32	62.51 ± 5.35	0.0302
ADCY3	93.78 ± 9.06	81.76 ± 9.99	0.00211	0.0317	cg22956310	5.61 ± 0.61	4.54 ± 0.6	0.000225
ADCY3	93.78 ± 9.06	81.76 ± 9.99	0.00211	0.0317	cg10106561	79.7 ± 5.16	83.25 ± 5.54	0.000994
ADCY3	93.78 ± 9.06	81.76 ± 9.99	0.00211	0.0317	cg14418176	92.22 ± 1.62	93.6 ± 1.36	0.00197
ADCY3	93.78 ± 9.06	81.76 ± 9.99	0.00211	0.0317	cg27449030	89.05 ± 2.94	91.11 ± 0.97	0.00449
ADCY3	93.78 ± 9.06	81.76 ± 9.99	0.00211	0.0317	cg04440551	34.06 ± 4.7	38.32 ± 6.62	0.0268
ADCY3	93.78 ± 9.06	81.76 ± 9.99	0.00211	0.0317	cg27107076	16.07 ± 3.24	14.91 ± 2.83	0.0289
ADCY3	93.78 ± 9.06	81.76 ± 9.99	0.00211	0.0317	cg04586622	68 ± 6.13	70.57 ± 6.9	0.0443
ADCY9	130.87 ± 12.63	115.78 ± 7.58	0.00033	0.012	cg07906046	37.61 ± 13.82	43.91 ± 15.4	0.00189
ADCY9	130.87 ± 12.63	115.78 ± 7.58	0.00033	0.012	cg11637718	79.35 ± 4.49	83.05 ± 4.3	0.00283
ADCY9	130.87 ± 12.63	115.78 ± 7.58	0.00033	0.012	cg05765011	29.86 ± 13.12	34.57 ± 13.39	0.00728
ADCY9	130.87 ± 12.63	115.78 ± 7.58	0.00033	0.012	cg10487659	87.98 ± 9.44	86.06 ± 8.94	0.0198
ADCY9	130.87 ± 12.63	115.78 ± 7.58	0.00033	0.012	cg13574337	77.38 ± 3.72	79.17 ± 4.95	0.0356
ADCY9	130.87 ± 12.63	115.78 ± 7.58	0.00033	0.012	cg01091261	85.43 ± 2.27	87.05 ± 1.4	0.0369
ADCY9	130.87 ± 12.63	115.78 ± 7.58	0.00033	0.012	cg04903429	87.78 ± 1.21	87.1 ± 1.26	0.0405
ADCY9	130.87 ± 12.63	115.78 ± 7.58	0.00033	0.012	cg00834536	71.86 ± 3.58	74.7 ± 5.3	0.0426
ADCY9	130.87 ± 12.63	115.78 ± 7.58	0.00033	0.012	cg09947844	84.85 ± 7.29	81.78 ± 9.23	0.0473
ADCYAP1	511.77 ± 274.77	775.02 ± 301.69	1.64e-05	0.00324	cg04105966	22.07 ± 8.69	26.13 ± 8.66	0.0269
ADD1	696.47 ± 42.04	630.73 ± 37.2	0.00248	0.0348	cg13466897	5.93 ± 0.96	6.84 ± 0.88	0.007
ADD1	696.47 ± 42.04	630.73 ± 37.2	0.00248	0.0348	cg03889700	33.25 ± 14.61	39.93 ± 15.84	0.0148
ADD1	696.47 ± 42.04	630.73 ± 37.2	0.00248	0.0348	cg12655250	93.24 ± 1.57	94.63 ± 2.07	0.02
ADD1	696.47 ± 42.04	630.73 ± 37.2	0.00248	0.0348	cg04589118	67.98 ± 2.88	71 ± 3.05	0.0227
ADD3	417.87 ± 57.37	344.84 ± 70.23	0.000774	0.0185	cg22666103	56.98 ± 10.27	62.05 ± 10.28	0.00392
ADI1	269.35 ± 55.2	211.94 ± 42.29	6.05e-05	0.00545	cg17095749	92.47 ± 2.27	93.6 ± 2.44	0.0188
ADI1	269.35 ± 55.2	211.94 ± 42.29	6.05e-05	0.00545	cg10209223	4.31 ± 0.89	3.58 ± 0.46	0.0291
AEN	166.45 ± 8.46	197.83 ± 33.14	0.00209	0.0317	cg26561254	27.28 ± 9.09	31.74 ± 8.66	0.00539
AEN	166.45 ± 8.46	197.83 ± 33.14	0.00209	0.0317	cg24687276	29.2 ± 3.68	34.01 ± 4.14	0.00585
AEN	166.45 ± 8.46	197.83 ± 33.14	0.00209	0.0317	cg20808613	40.91 ± 8.75	43.65 ± 7.21	0.0157
AEN	166.45 ± 8.46	197.83 ± 33.14	0.00209	0.0317	cg10248985	64.87 ± 14.43	70.18 ± 11.01	0.0284
AGR3	33.68 ± 14.23	23.62 ± 9.55	0.000106	0.00704	cg16702815	65.62 ± 15.9	60.73 ± 17.8	0.00989
AGR3	33.68 ± 14.23	23.62 ± 9.55	0.000106	0.00704	cg11039314	80.88 ± 13.91	76.31 ± 17.02	0.0403
AGRN	147.63 ± 34.18	130.97 ± 33.22	0.000149	0.00815	cg14663984	21.75 ± 5.61	25.33 ± 5.64	0.00372
AGRN	147.63 ± 34.18	130.97 ± 33.22	0.000149	0.00815	cg16903000	95.65 ± 1.16	96.3 ± 1.36	0.0074
AGRN	147.63 ± 34.18	130.97 ± 33.22	0.000149	0.00815	cg01711077	59.6 ± 3.83	63.24 ± 4.86	0.0095
AGRN	147.63 ± 34.18	130.97 ± 33.22	0.000149	0.00815	cg25759916	16.86 ± 2.5	18.95 ± 3.83	0.0116
AGRN	147.63 ± 34.18	130.97 ± 33.22	0.000149	0.00815	cg12469361	91.61 ± 0.98	92.57 ± 1.41	0.0144
AGRN	147.63 ± 34.18	130.97 ± 33.22	0.000149	0.00815	cg09248054	41.77 ± 7.36	44.65 ± 8.44	0.0179
AGRN	147.63 ± 34.18	130.97 ± 33.22	0.000149	0.00815	cg14252395	87.76 ± 2.25	88.9 ± 2.89	0.0292
AGRN	147.63 ± 34.18	130.97 ± 33.22	0.000149	0.00815	cg15840462	45.39 ± 5.82	47.75 ± 6.93	0.0311
AGRN	147.63 ± 34.18	130.97 ± 33.22	0.000149	0.00815	cg18380070	94.02 ± 2.01	94.96 ± 1.27	0.037
AGRN	147.63 ± 34.18	130.97 ± 33.22	0.000149	0.00815	cg11853970	87.43 ± 14.21	88.77 ± 15.01	0.0486
AHI1	278.03 ± 94.87	332.86 ± 103.35	0.0044	0.0479	cg04263024	70.51 ± 11.9	74.56 ± 11.05	0.0211
AHI1	278.03 ± 94.87	332.86 ± 103.35	0.0044	0.0479	cg20128181	3.01 ± 0.52	3.5 ± 0.63	0.0343
AIDA	850.74 ± 75.71	930.92 ± 69.38	0.00172	0.0287	cg15559578	3.89 ± 0.65	3.59 ± 0.78	0.0193
AKR1C3	3642.92 ± 894.24	3033.88 ± 983.23	0.00452	0.0488	cg12530994	42.92 ± 8.15	40.43 ± 8.14	0.0256
ALAD	199.57 ± 42.96	167.38 ± 33.84	0.00294	0.0382	cg21233377	90.97 ± 2.51	92.13 ± 2.57	0.0347
ALDH1A3	624.79 ± 244.78	388.83 ± 176.91	5.36e-06	0.0022	cg07465028	76.01 ± 7.1	78.52 ± 6.88	0.000921
ALDH1A3	624.79 ± 244.78	388.83 ± 176.91	5.36e-06	0.0022	cg26509022	22.68 ± 6.29	20.48 ± 5.75	0.0164
ALDH1A3	624.79 ± 244.78	388.83 ± 176.91	5.36e-06	0.0022	cg19510698	86.85 ± 1.55	88.19 ± 2.5	0.0221
ALDH1B1	381.62 ± 94.46	331.7 ± 100.64	0.00178	0.0292	cg25478603	4.49 ± 0.5	5.03 ± 0.68	0.026
ALDH1B1	381.62 ± 94.46	331.7 ± 100.64	0.00178	0.0292	cg13984005	89.36 ± 2.17	90.69 ± 2.03	0.0314
ALDH2	576.68 ± 111.41	481.86 ± 84.13	0.000971	0.0208	cg19186356	20.12 ± 4.69	22.84 ± 4.7	0.00865
ALDH2	576.68 ± 111.41	481.86 ± 84.13	0.000971	0.0208	cg18535456	89.47 ± 1.54	90.95 ± 1.38	0.0401
ALG14	160.15 ± 16.65	189.39 ± 27.81	0.000146	0.00807	cg09795087	56.58 ± 9.98	61.79 ± 9.36	0.00193
ALG9	528.14 ± 50.79	600.47 ± 71.99	0.000313	0.0117	cg01186919	5.91 ± 1.98	7.78 ± 2.77	0.0166
ALG9	528.14 ± 50.79	600.47 ± 71.99	0.000313	0.0117	cg26157333	89.23 ± 1.58	90.37 ± 2.87	0.048
AMIGO2	126.95 ± 21.74	116.13 ± 21.83	0.0038	0.0442	cg05838358	72.55 ± 3.47	75.87 ± 4.44	0.00339
AMIGO2	126.95 ± 21.74	116.13 ± 21.83	0.0038	0.0442	cg18436898	92.93 ± 2.17	93.9 ± 2.12	0.0207
AMIGO2	126.95 ± 21.74	116.13 ± 21.83	0.0038	0.0442	cg16780890	4.55 ± 0.76	3.69 ± 0.8	0.0292
AMIGO2	126.95 ± 21.74	116.13 ± 21.83	0.0038	0.0442	cg13640200	12.51 ± 4.57	11.42 ± 4.53	0.0396
AMIGO2	126.95 ± 21.74	116.13 ± 21.83	0.0038	0.0442	cg08135379	51.24 ± 10.55	47.38 ± 10.37	0.0487
AMOTL1	159.73 ± 32.73	141.07 ± 25.53	0.000146	0.00807	cg26130242	88.09 ± 2.45	89.9 ± 2.34	0.00587
AMOTL1	159.73 ± 32.73	141.07 ± 25.53	0.000146	0.00807	cg16943185	52.81 ± 5.84	55.03 ± 5.14	0.0223
AMOTL1	159.73 ± 32.73	141.07 ± 25.53	0.000146	0.00807	cg05130679	39.97 ± 12.12	35.99 ± 13.35	0.0294
AMOTL1	159.73 ± 32.73	141.07 ± 25.53	0.000146	0.00807	cg08416315	95.02 ± 0.8	95.64 ± 0.66	0.0313
AMOTL1	159.73 ± 32.73	141.07 ± 25.53	0.000146	0.00807	cg02838432	95.52 ± 0.56	96.21 ± 0.69	0.0413
AMPD3	122.7 ± 17.14	153.7 ± 31.99	0.00426	0.0471	cg12069276	48.34 ± 15.07	55.65 ± 14.96	0.00288
AMPD3	122.7 ± 17.14	153.7 ± 31.99	0.00426	0.0471	cg23937993	23.36 ± 9.42	27.36 ± 10.74	0.00635
AMPD3	122.7 ± 17.14	153.7 ± 31.99	0.00426	0.0471	cg18593305	70.65 ± 5.92	74.09 ± 5.38	0.00664
AMPD3	122.7 ± 17.14	153.7 ± 31.99	0.00426	0.0471	cg25968076	24.8 ± 9.21	29.07 ± 9.9	0.00974
AMPD3	122.7 ± 17.14	153.7 ± 31.99	0.00426	0.0471	cg07329251	36.96 ± 15.3	42.64 ± 16.6	0.0111
AMPD3	122.7 ± 17.14	153.7 ± 31.99	0.00426	0.0471	cg14655905	64.23 ± 5.19	66.8 ± 5.15	0.0139
AMPD3	122.7 ± 17.14	153.7 ± 31.99	0.00426	0.0471	cg16715129	39.51 ± 7.81	42.44 ± 7.49	0.0154
AMPD3	122.7 ± 17.14	153.7 ± 31.99	0.00426	0.0471	cg18010131	47.74 ± 16.76	54.25 ± 17.38	0.0176
AMPD3	122.7 ± 17.14	153.7 ± 31.99	0.00426	0.0471	cg23619910	9.97 ± 3.61	12.72 ± 5.34	0.0181
AMPD3	122.7 ± 17.14	153.7 ± 31.99	0.00426	0.0471	cg07268332	46.82 ± 17.35	53.26 ± 17.43	0.0244
AMPD3	122.7 ± 17.14	153.7 ± 31.99	0.00426	0.0471	cg12685539	12.99 ± 3.18	14.52 ± 2.59	0.0276
AMPD3	122.7 ± 17.14	153.7 ± 31.99	0.00426	0.0471	cg19132462	38.77 ± 16.07	44.26 ± 16.93	0.0283
AMZ2	674.87 ± 69.54	744.04 ± 89.39	0.000171	0.00867	cg24576285	57.46 ± 2.37	58.84 ± 1.82	0.0393
ANGPTL4	176.22 ± 108.99	221.34 ± 125.44	0.000611	0.0163	cg16745616	19.11 ± 7.86	21.68 ± 8.21	0.017
ANKRD37	110.17 ± 43.64	136.92 ± 41.31	0.000282	0.0111	cg24220767	5.01 ± 0.7	4.5 ± 1.04	0.0246
ANKRD37	110.17 ± 43.64	136.92 ± 41.31	0.000282	0.0111	cg05725892	3.81 ± 0.52	4.22 ± 0.78	0.0342
ANKRD6	141.73 ± 19.07	122.2 ± 11.74	0.00315	0.0398	cg08353308	74.18 ± 11.42	79.85 ± 10.36	0.018
ANKRD6	141.73 ± 19.07	122.2 ± 11.74	0.00315	0.0398	cg12209743	5.36 ± 0.66	4.77 ± 0.43	0.0204
ANLN	61.1 ± 25.02	34.09 ± 17.97	8.39e-06	0.00239	cg00267323	91.19 ± 4.21	94.77 ± 2.07	0.00348
ANLN	61.1 ± 25.02	34.09 ± 17.97	8.39e-06	0.00239	cg04897631	94.42 ± 0.84	95.26 ± 0.81	0.00459
ANO10	497.64 ± 62.94	644.42 ± 117.72	4.14e-05	0.00481	cg27146477	96.99 ± 0.76	97.78 ± 0.64	3.42e-05
ANO10	497.64 ± 62.94	644.42 ± 117.72	4.14e-05	0.00481	cg00495305	77.37 ± 3.5	79.61 ± 3.37	0.00144
ANO10	497.64 ± 62.94	644.42 ± 117.72	4.14e-05	0.00481	cg01019163	2.6 ± 0.39	2.2 ± 0.45	0.0194
ANO10	497.64 ± 62.94	644.42 ± 117.72	4.14e-05	0.00481	cg00090865	6.83 ± 0.95	5.95 ± 0.95	0.0194
ANO10	497.64 ± 62.94	644.42 ± 117.72	4.14e-05	0.00481	cg26848963	89.46 ± 1.46	90.74 ± 1.02	0.0202
ANO10	497.64 ± 62.94	644.42 ± 117.72	4.14e-05	0.00481	cg14145438	94.29 ± 1.24	95.18 ± 1.37	0.0211
ANO10	497.64 ± 62.94	644.42 ± 117.72	4.14e-05	0.00481	cg24524538	3.74 ± 0.67	3.38 ± 0.81	0.0459
ANO10	497.64 ± 62.94	644.42 ± 117.72	4.14e-05	0.00481	cg18034092	93.84 ± 2.09	94.72 ± 1.44	0.0471
ANO6	540.98 ± 219.61	476 ± 222.12	0.00228	0.0331	cg19326153	5.13 ± 1.4	4.58 ± 1.37	0.00648
ANO6	540.98 ± 219.61	476 ± 222.12	0.00228	0.0331	cg23336996	72.9 ± 4.2	75.82 ± 4.03	0.0103
ANO6	540.98 ± 219.61	476 ± 222.12	0.00228	0.0331	cg06551540	84.98 ± 9.61	81.66 ± 11.45	0.0213
ANO6	540.98 ± 219.61	476 ± 222.12	0.00228	0.0331	cg14376618	88.3 ± 3.96	91.08 ± 5.04	0.024
ANO6	540.98 ± 219.61	476 ± 222.12	0.00228	0.0331	cg23310538	6.28 ± 1.01	5.6 ± 0.96	0.0277
ANO6	540.98 ± 219.61	476 ± 222.12	0.00228	0.0331	cg19549469	95.19 ± 0.73	95.79 ± 0.81	0.0294
ANO6	540.98 ± 219.61	476 ± 222.12	0.00228	0.0331	cg27181148	93.85 ± 1.44	95.02 ± 1.94	0.0379
ANO6	540.98 ± 219.61	476 ± 222.12	0.00228	0.0331	cg24949344	2.38 ± 0.46	2.09 ± 0.24	0.0437
ANPEP	698.84 ± 353.2	518.65 ± 292.86	0.0012	0.0235	cg12382398	36.54 ± 3.67	38.12 ± 4.62	0.00802
ANPEP	698.84 ± 353.2	518.65 ± 292.86	0.0012	0.0235	cg13042288	68.32 ± 15.39	62.12 ± 16.96	0.0164
ANPEP	698.84 ± 353.2	518.65 ± 292.86	0.0012	0.0235	cg16914674	80.18 ± 15.49	78.08 ± 14.43	0.0352
ANTXR1	214.06 ± 99.92	186.87 ± 82.83	0.00375	0.0438	cg10843887	10.46 ± 2.26	12.38 ± 2.94	0.01
ANTXR1	214.06 ± 99.92	186.87 ± 82.83	0.00375	0.0438	cg01049695	62.36 ± 12.96	67.89 ± 12.68	0.0138
ANTXR1	214.06 ± 99.92	186.87 ± 82.83	0.00375	0.0438	cg27490875	23.42 ± 4.13	26.98 ± 6.36	0.0185
ANTXR1	214.06 ± 99.92	186.87 ± 82.83	0.00375	0.0438	cg22766014	3.16 ± 0.7	2.66 ± 0.57	0.0191
ANTXR1	214.06 ± 99.92	186.87 ± 82.83	0.00375	0.0438	cg04834204	48.01 ± 3.73	52.29 ± 4.42	0.0242
ANTXR1	214.06 ± 99.92	186.87 ± 82.83	0.00375	0.0438	cg08194677	3.49 ± 0.5	3.08 ± 0.62	0.0268
ANTXR1	214.06 ± 99.92	186.87 ± 82.83	0.00375	0.0438	cg09987993	77 ± 4.11	81.21 ± 4.58	0.0315
ANTXR1	214.06 ± 99.92	186.87 ± 82.83	0.00375	0.0438	cg05095428	59.72 ± 4.37	61.48 ± 3.4	0.0442
ANTXR2	140.28 ± 32.58	114.51 ± 39.57	0.00196	0.0309	cg01174264	46.55 ± 6.61	50.84 ± 5.47	0.0128
ANTXR2	140.28 ± 32.58	114.51 ± 39.57	0.00196	0.0309	cg03164800	78.15 ± 4.49	80.96 ± 5.09	0.0141
ANTXR2	140.28 ± 32.58	114.51 ± 39.57	0.00196	0.0309	cg16326777	79.82 ± 6.24	82.97 ± 6.54	0.0212
ANTXR2	140.28 ± 32.58	114.51 ± 39.57	0.00196	0.0309	cg02890102	6.65 ± 1.52	5.89 ± 1.62	0.0216
ANXA4	4765.58 ± 1165.98	3577.82 ± 1376.34	0.00105	0.0217	cg25099065	77.97 ± 8.54	72.72 ± 9.43	0.000856
ANXA4	4765.58 ± 1165.98	3577.82 ± 1376.34	0.00105	0.0217	cg11072779	88.27 ± 3.28	86.48 ± 3.81	0.0261
ANXA4	4765.58 ± 1165.98	3577.82 ± 1376.34	0.00105	0.0217	cg13355704	13.21 ± 3.36	11.67 ± 4.47	0.0415
ANXA4	4765.58 ± 1165.98	3577.82 ± 1376.34	0.00105	0.0217	cg17719951	68.72 ± 11.23	64.26 ± 13.12	0.0463
ANXA9	212.83 ± 100.28	143.66 ± 76.36	7.59e-06	0.00239	cg13320146	64.61 ± 11.12	61.04 ± 12.97	0.0327
APBB2	253.28 ± 50.94	307.69 ± 70.7	0.00328	0.0409	cg16823610	93.87 ± 1.38	95.23 ± 1.11	0.0042
APBB2	253.28 ± 50.94	307.69 ± 70.7	0.00328	0.0409	cg17699214	55.89 ± 16.15	62.9 ± 15.6	0.00767
APBB2	253.28 ± 50.94	307.69 ± 70.7	0.00328	0.0409	cg13690063	94.94 ± 0.95	96.14 ± 0.86	0.0167
APBB2	253.28 ± 50.94	307.69 ± 70.7	0.00328	0.0409	cg02650667	38.49 ± 13	43.64 ± 12.32	0.0188
APBB2	253.28 ± 50.94	307.69 ± 70.7	0.00328	0.0409	cg08174482	96.29 ± 1.23	97.03 ± 1.09	0.0212
APBB2	253.28 ± 50.94	307.69 ± 70.7	0.00328	0.0409	cg24656517	68.11 ± 13.6	73.24 ± 13.93	0.0386
APBB2	253.28 ± 50.94	307.69 ± 70.7	0.00328	0.0409	cg24644605	96.11 ± 0.67	96.87 ± 1.14	0.0394
APBB2	253.28 ± 50.94	307.69 ± 70.7	0.00328	0.0409	cg25333257	68.41 ± 7.29	69.93 ± 6.35	0.0409
APBB2	253.28 ± 50.94	307.69 ± 70.7	0.00328	0.0409	cg18401298	72.59 ± 3.64	74.14 ± 4.77	0.0417
APBB2	253.28 ± 50.94	307.69 ± 70.7	0.00328	0.0409	cg07291349	84.75 ± 5.15	87.75 ± 2.41	0.0436
APCDD1	181.59 ± 64.03	148.28 ± 58.45	0.000358	0.0125	cg04229487	82.97 ± 2.86	84.95 ± 3.51	0.0211
APCDD1	181.59 ± 64.03	148.28 ± 58.45	0.000358	0.0125	cg02839071	91.24 ± 2.19	92.5 ± 0.96	0.0242
APCDD1	181.59 ± 64.03	148.28 ± 58.45	0.000358	0.0125	cg03396005	91.39 ± 2.08	92.6 ± 1.2	0.0358
APP	4817.94 ± 272.4	4393.76 ± 251.45	1.32e-05	0.00297	cg23269692	93.86 ± 1.05	95.06 ± 0.98	0.00427
APP	4817.94 ± 272.4	4393.76 ± 251.45	1.32e-05	0.00297	cg11321156	95.03 ± 1.8	96.32 ± 0.8	0.0126
ARCN1	1315.67 ± 173.77	1441.85 ± 167.33	0.000759	0.0184	cg14826972	3.74 ± 0.71	3.21 ± 0.49	0.047
ARF4	2729.09 ± 330.19	2982.6 ± 260.44	0.0024	0.0341	cg08957289	2.96 ± 0.35	3.34 ± 0.48	0.0201
ARF4	2729.09 ± 330.19	2982.6 ± 260.44	0.0024	0.0341	cg26103560	6.54 ± 0.86	5.83 ± 0.71	0.0261
ARF6	494.98 ± 53.55	439.93 ± 53.94	2.11e-05	0.00368	cg04838107	4.38 ± 0.73	4.99 ± 0.98	0.0287
ARFGAP3	522.1 ± 68.03	584.15 ± 65.23	0.00261	0.0358	cg14570855	95.28 ± 0.51	95.86 ± 0.57	0.00338
ARG2	331.36 ± 163.57	564.74 ± 231.14	2.93e-06	0.00195	cg07922154	24.34 ± 4.13	26.24 ± 5.13	0.0341
ARG2	331.36 ± 163.57	564.74 ± 231.14	2.93e-06	0.00195	cg20477070	3.09 ± 0.43	2.72 ± 0.46	0.0373
ARG2	331.36 ± 163.57	564.74 ± 231.14	2.93e-06	0.00195	cg04822973	13.19 ± 1.29	11.97 ± 0.84	0.0427
ARHGAP20	19.38 ± 1.61	17.1 ± 1.81	0.00348	0.0419	cg21197233	87.62 ± 3.76	89.25 ± 3.5	0.022
ARHGAP20	19.38 ± 1.61	17.1 ± 1.81	0.00348	0.0419	cg26210187	8.83 ± 1.12	7.88 ± 0.9	0.0224
ARHGAP26	164.87 ± 32.46	135.22 ± 25.06	2.8e-05	0.00414	cg03328750	2.53 ± 0.32	2.08 ± 0.46	0.00171
ARHGAP26	164.87 ± 32.46	135.22 ± 25.06	2.8e-05	0.00414	cg23937633	87.62 ± 5.64	88.6 ± 5.33	0.0037
ARHGAP26	164.87 ± 32.46	135.22 ± 25.06	2.8e-05	0.00414	cg07180252	3.68 ± 0.79	3.04 ± 0.48	0.00517
ARHGAP26	164.87 ± 32.46	135.22 ± 25.06	2.8e-05	0.00414	cg05153380	62.62 ± 5.72	67.53 ± 6.11	0.00703
ARHGAP26	164.87 ± 32.46	135.22 ± 25.06	2.8e-05	0.00414	cg00362959	3.77 ± 0.4	3.35 ± 0.39	0.0102
ARHGAP26	164.87 ± 32.46	135.22 ± 25.06	2.8e-05	0.00414	cg11796181	69.48 ± 13.18	74.79 ± 10.95	0.0122
ARHGAP26	164.87 ± 32.46	135.22 ± 25.06	2.8e-05	0.00414	cg05185926	48.02 ± 17.66	53.94 ± 19.85	0.022
ARHGAP26	164.87 ± 32.46	135.22 ± 25.06	2.8e-05	0.00414	cg17262755	58.58 ± 7.07	62.32 ± 4.18	0.0334
ARHGAP26	164.87 ± 32.46	135.22 ± 25.06	2.8e-05	0.00414	cg07618462	43.65 ± 13.15	49.16 ± 11.87	0.0362
ARHGAP26	164.87 ± 32.46	135.22 ± 25.06	2.8e-05	0.00414	cg11867084	76.1 ± 4.07	80.53 ± 3.96	0.0401
ARHGAP26	164.87 ± 32.46	135.22 ± 25.06	2.8e-05	0.00414	cg15368044	79.35 ± 5.25	83.43 ± 2.06	0.0476
ARHGDIB	221.38 ± 65.06	169.31 ± 50.73	0.00218	0.0322	cg06395232	88.45 ± 2.9	89.75 ± 2.81	0.0369
ARHGEF3	394.81 ± 100.17	303.08 ± 61.27	0.0001	0.0068	cg08052292	63.05 ± 12.56	68.98 ± 12.75	0.00209
ARHGEF3	394.81 ± 100.17	303.08 ± 61.27	0.0001	0.0068	cg15012214	32.94 ± 11.4	40.37 ± 13.74	0.00328
ARHGEF3	394.81 ± 100.17	303.08 ± 61.27	0.0001	0.0068	cg13745870	70.15 ± 11.81	65.6 ± 11.92	0.00529
ARHGEF3	394.81 ± 100.17	303.08 ± 61.27	0.0001	0.0068	cg12835118	43.54 ± 11.21	49.73 ± 12.41	0.0062
ARHGEF3	394.81 ± 100.17	303.08 ± 61.27	0.0001	0.0068	cg19142341	81.87 ± 3.55	84.22 ± 4.18	0.00696
ARHGEF3	394.81 ± 100.17	303.08 ± 61.27	0.0001	0.0068	cg12704098	96.72 ± 0.88	95.78 ± 1.63	0.0208
ARHGEF3	394.81 ± 100.17	303.08 ± 61.27	0.0001	0.0068	cg12325605	47.02 ± 16.02	53.69 ± 18.11	0.0252
ARHGEF3	394.81 ± 100.17	303.08 ± 61.27	0.0001	0.0068	cg13912849	93.16 ± 1.47	94.02 ± 1.28	0.04
ARID5B	408.84 ± 52.37	536.44 ± 100.05	0.000132	0.00773	cg02863179	52.98 ± 9.38	58.49 ± 7.54	0.00387
ARID5B	408.84 ± 52.37	536.44 ± 100.05	0.000132	0.00773	cg22782105	87.92 ± 2.98	90.4 ± 1.13	0.00531
ARID5B	408.84 ± 52.37	536.44 ± 100.05	0.000132	0.00773	cg27027230	55.4 ± 9.34	59.77 ± 9.64	0.0101
ARID5B	408.84 ± 52.37	536.44 ± 100.05	0.000132	0.00773	cg08806401	94.93 ± 1.05	95.86 ± 0.48	0.0143
ARID5B	408.84 ± 52.37	536.44 ± 100.05	0.000132	0.00773	cg11283402	87.52 ± 3.86	90.63 ± 3.04	0.019
ARID5B	408.84 ± 52.37	536.44 ± 100.05	0.000132	0.00773	cg26758131	42.18 ± 13.8	47.42 ± 13.05	0.0221
ARID5B	408.84 ± 52.37	536.44 ± 100.05	0.000132	0.00773	cg13958324	94.03 ± 0.8	95.02 ± 1.01	0.0291
ARID5B	408.84 ± 52.37	536.44 ± 100.05	0.000132	0.00773	cg12616691	70.92 ± 10.15	74.39 ± 10.95	0.0334
ARL1	905.13 ± 216.51	1070.37 ± 237.03	6.24e-06	0.00232	cg00667976	3.58 ± 0.56	4.26 ± 0.83	0.0234
ARL1	905.13 ± 216.51	1070.37 ± 237.03	6.24e-06	0.00232	cg20866788	2.77 ± 0.55	2.35 ± 0.45	0.0373
ARPC5	1085.5 ± 104.46	1012.35 ± 99.74	0.00122	0.0236	cg10120056	5.63 ± 1.26	4.78 ± 1.43	0.0138
ARPC5	1085.5 ± 104.46	1012.35 ± 99.74	0.00122	0.0236	cg27155653	3.54 ± 0.58	4.01 ± 0.5	0.0465
ARRB1	165.19 ± 21.65	140.85 ± 20.47	0.00081	0.019	cg21574316	5.26 ± 0.49	4.7 ± 0.55	0.00373
ARRB1	165.19 ± 21.65	140.85 ± 20.47	0.00081	0.019	cg06454982	77.02 ± 4.7	79.74 ± 4.71	0.00847
ARRDC3	1536.15 ± 288.02	1749.26 ± 291.77	0.0021	0.0317	cg11240212	2.83 ± 0.35	2.62 ± 0.29	0.0324
ARSI	64.55 ± 18.95	53.81 ± 13.16	0.00388	0.0448	cg02613713	92.92 ± 1.18	93.68 ± 1.61	0.0294
ARSI	64.55 ± 18.95	53.81 ± 13.16	0.00388	0.0448	cg26530201	7.5 ± 1.82	6.67 ± 1.51	0.0499
ASAH1	2772.52 ± 351.49	2497.83 ± 361.23	0.000835	0.0193	cg07312099	9.55 ± 1.82	11.61 ± 2.11	0.0235
ASAH1	2772.52 ± 351.49	2497.83 ± 361.23	0.000835	0.0193	cg18929511	32.06 ± 2.75	34.08 ± 4.01	0.0265
ASAH1	2772.52 ± 351.49	2497.83 ± 361.23	0.000835	0.0193	cg10583499	3.06 ± 0.58	3.47 ± 0.6	0.0334
ASB13	115.14 ± 10.87	101.43 ± 12.12	0.00251	0.0349	cg27176938	97.13 ± 0.95	97.82 ± 0.61	0.0141
ASB13	115.14 ± 10.87	101.43 ± 12.12	0.00251	0.0349	cg04329659	90.69 ± 2.76	92.46 ± 2.52	0.0247
ASB13	115.14 ± 10.87	101.43 ± 12.12	0.00251	0.0349	cg10920632	86.98 ± 2.81	88.39 ± 2.55	0.0276
ASB13	115.14 ± 10.87	101.43 ± 12.12	0.00251	0.0349	cg09361469	73.36 ± 7.43	77.03 ± 8.97	0.0325
ASB9	174.49 ± 99.09	102.1 ± 52.54	0.00201	0.0312	cg13824755	89.59 ± 3.63	92.27 ± 1.73	0.00202
ASB9	174.49 ± 99.09	102.1 ± 52.54	0.00201	0.0312	cg01540916	40.36 ± 7.02	46.97 ± 9.48	0.00329
ASB9	174.49 ± 99.09	102.1 ± 52.54	0.00201	0.0312	cg22673121	89.58 ± 3.42	91.39 ± 3	0.0041
ASPHD1	107.54 ± 16.79	129.14 ± 23.56	0.000366	0.0127	cg27539546	8.67 ± 1.21	7.24 ± 0.88	0.00131
ASPHD1	107.54 ± 16.79	129.14 ± 23.56	0.000366	0.0127	cg02488299	85.26 ± 2.66	87.08 ± 1.72	0.0348
ASRGL1	290.89 ± 40.8	241.18 ± 37.99	0.00226	0.033	cg13209154	85.02 ± 8.15	80.53 ± 10.11	0.00383
ASRGL1	290.89 ± 40.8	241.18 ± 37.99	0.00226	0.033	cg24257490	94.84 ± 1.28	95.8 ± 0.98	0.0473
ASS1	646.03 ± 215.81	463.17 ± 108.81	4.59e-05	0.00498	cg13835114	25.72 ± 8.86	21.85 ± 9.32	0.00564
ASS1	646.03 ± 215.81	463.17 ± 108.81	4.59e-05	0.00498	cg14053997	50.09 ± 10.78	54.42 ± 11.18	0.00596
ASS1	646.03 ± 215.81	463.17 ± 108.81	4.59e-05	0.00498	cg14388093	55.56 ± 17.3	60.42 ± 16.71	0.0351
ASS1	646.03 ± 215.81	463.17 ± 108.81	4.59e-05	0.00498	cg14529412	51.73 ± 14.36	55.46 ± 15.33	0.0419
ATF3	67.72 ± 16.33	108.32 ± 37.61	0.000158	0.00837	cg24365042	10.77 ± 2.32	13.35 ± 2.59	0.00434
ATF3	67.72 ± 16.33	108.32 ± 37.61	0.000158	0.00837	cg18174834	16.02 ± 3.13	17.81 ± 3.28	0.00945
ATF3	67.72 ± 16.33	108.32 ± 37.61	0.000158	0.00837	cg03717803	3.54 ± 0.66	3.02 ± 0.71	0.0314
ATF3	67.72 ± 16.33	108.32 ± 37.61	0.000158	0.00837	cg01668452	4.92 ± 0.82	4.28 ± 1.04	0.0317
ATF3	67.72 ± 16.33	108.32 ± 37.61	0.000158	0.00837	cg25386151	13.17 ± 2.72	14.52 ± 3.24	0.0465
ATF3	67.72 ± 16.33	108.32 ± 37.61	0.000158	0.00837	cg05880577	22.54 ± 5.24	20.64 ± 5.52	0.0476
ATG2B	330.83 ± 46.43	290.16 ± 30.07	0.00298	0.0384	cg03573443	4.17 ± 0.4	3.65 ± 0.55	0.0078
ATG2B	330.83 ± 46.43	290.16 ± 30.07	0.00298	0.0384	cg07054904	87.61 ± 8.49	83.25 ± 10.53	0.0188
ATG2B	330.83 ± 46.43	290.16 ± 30.07	0.00298	0.0384	cg14897298	73.14 ± 10.09	67.5 ± 13.47	0.0201
ATG2B	330.83 ± 46.43	290.16 ± 30.07	0.00298	0.0384	cg14060719	89.83 ± 2.77	91.65 ± 1.55	0.0213
ATG2B	330.83 ± 46.43	290.16 ± 30.07	0.00298	0.0384	cg01050076	86.53 ± 2.34	88.16 ± 2.41	0.0402
ATP10B	240 ± 113.49	187.49 ± 94.32	1.89e-06	0.00162	cg21136182	95.19 ± 0.76	96.06 ± 0.61	0.00649
ATP10B	240 ± 113.49	187.49 ± 94.32	1.89e-06	0.00162	cg15542637	95.47 ± 0.87	96.16 ± 0.99	0.0266
ATP10B	240 ± 113.49	187.49 ± 94.32	1.89e-06	0.00162	cg02543268	79.87 ± 5.2	82.26 ± 4.92	0.0271
ATP11A	184.88 ± 37.83	155.3 ± 30.46	0.00262	0.0358	cg09375377	96.31 ± 0.92	97.28 ± 0.64	1.79e-05
ATP11A	184.88 ± 37.83	155.3 ± 30.46	0.00262	0.0358	cg09714789	89.06 ± 1.73	91.16 ± 1.06	0.000326
ATP11A	184.88 ± 37.83	155.3 ± 30.46	0.00262	0.0358	cg04099767	61.25 ± 3.63	63.33 ± 3.75	0.000574
ATP11A	184.88 ± 37.83	155.3 ± 30.46	0.00262	0.0358	cg10208284	83.98 ± 3.66	86.62 ± 3.62	0.000671
ATP11A	184.88 ± 37.83	155.3 ± 30.46	0.00262	0.0358	cg16474643	86.94 ± 2.22	89.06 ± 1.66	0.000758
ATP11A	184.88 ± 37.83	155.3 ± 30.46	0.00262	0.0358	cg02417360	77.72 ± 4.95	80.86 ± 4.86	0.0012
ATP11A	184.88 ± 37.83	155.3 ± 30.46	0.00262	0.0358	cg20617344	94.91 ± 0.65	95.83 ± 0.54	0.00165
ATP11A	184.88 ± 37.83	155.3 ± 30.46	0.00262	0.0358	cg19970086	93 ± 1.26	94.41 ± 0.65	0.00298
ATP11A	184.88 ± 37.83	155.3 ± 30.46	0.00262	0.0358	cg22273355	96.7 ± 0.68	97.56 ± 0.65	0.00383
ATP11A	184.88 ± 37.83	155.3 ± 30.46	0.00262	0.0358	cg02699898	93.39 ± 2.11	94.53 ± 1.56	0.00401
ATP11A	184.88 ± 37.83	155.3 ± 30.46	0.00262	0.0358	cg00281664	45.39 ± 3.2	48.06 ± 3.82	0.00523
ATP11A	184.88 ± 37.83	155.3 ± 30.46	0.00262	0.0358	cg14537203	91.73 ± 1.99	92.94 ± 1.28	0.00582
ATP11A	184.88 ± 37.83	155.3 ± 30.46	0.00262	0.0358	cg08119256	86.42 ± 5.84	89.3 ± 4.27	0.00595
ATP11A	184.88 ± 37.83	155.3 ± 30.46	0.00262	0.0358	cg07583690	85.02 ± 6.61	87.54 ± 4.99	0.00836
ATP11A	184.88 ± 37.83	155.3 ± 30.46	0.00262	0.0358	cg01795082	73.61 ± 3.89	76.73 ± 3.34	0.00893
ATP11A	184.88 ± 37.83	155.3 ± 30.46	0.00262	0.0358	cg02175301	92.78 ± 2	93.66 ± 1.86	0.00895
ATP11A	184.88 ± 37.83	155.3 ± 30.46	0.00262	0.0358	cg03557950	93.3 ± 2.22	94.79 ± 1.35	0.0106
ATP11A	184.88 ± 37.83	155.3 ± 30.46	0.00262	0.0358	cg12572352	87.27 ± 3.97	88.96 ± 4.57	0.0115
ATP11A	184.88 ± 37.83	155.3 ± 30.46	0.00262	0.0358	cg18475128	80.77 ± 7.02	83.98 ± 4.56	0.0121
ATP11A	184.88 ± 37.83	155.3 ± 30.46	0.00262	0.0358	cg01715686	93.56 ± 1.47	94.88 ± 0.76	0.0141
ATP11A	184.88 ± 37.83	155.3 ± 30.46	0.00262	0.0358	cg22571393	87.41 ± 2.57	89.42 ± 2.05	0.0147
ATP11A	184.88 ± 37.83	155.3 ± 30.46	0.00262	0.0358	cg18289557	81.6 ± 7.78	77.46 ± 9.6	0.0151
ATP11A	184.88 ± 37.83	155.3 ± 30.46	0.00262	0.0358	cg27096043	45.52 ± 15.28	51.43 ± 16.07	0.016
ATP11A	184.88 ± 37.83	155.3 ± 30.46	0.00262	0.0358	cg03236534	94.79 ± 1.3	95.89 ± 1.28	0.0172
ATP11A	184.88 ± 37.83	155.3 ± 30.46	0.00262	0.0358	cg12511137	55.27 ± 10.59	59.45 ± 9.48	0.0189
ATP11A	184.88 ± 37.83	155.3 ± 30.46	0.00262	0.0358	cg01356558	89.46 ± 1.95	90.92 ± 1.32	0.0192
ATP11A	184.88 ± 37.83	155.3 ± 30.46	0.00262	0.0358	cg02879438	81.12 ± 7.73	84.88 ± 5.51	0.0197
ATP11A	184.88 ± 37.83	155.3 ± 30.46	0.00262	0.0358	cg13454646	92.85 ± 2.14	94 ± 1.81	0.0206
ATP11A	184.88 ± 37.83	155.3 ± 30.46	0.00262	0.0358	cg03834592	94.89 ± 0.84	95.53 ± 0.78	0.0225
ATP11A	184.88 ± 37.83	155.3 ± 30.46	0.00262	0.0358	cg22301418	81.97 ± 2.47	84.23 ± 3.44	0.0237
ATP11A	184.88 ± 37.83	155.3 ± 30.46	0.00262	0.0358	cg19293163	69.78 ± 8.94	73.87 ± 8.6	0.0249
ATP11A	184.88 ± 37.83	155.3 ± 30.46	0.00262	0.0358	cg02738374	89.4 ± 3.93	92.04 ± 2.29	0.0252
ATP11A	184.88 ± 37.83	155.3 ± 30.46	0.00262	0.0358	cg04570540	92.81 ± 2.98	94.04 ± 2.36	0.026
ATP11A	184.88 ± 37.83	155.3 ± 30.46	0.00262	0.0358	cg25280418	85.63 ± 2.87	88.05 ± 3.29	0.0262
ATP11A	184.88 ± 37.83	155.3 ± 30.46	0.00262	0.0358	cg26380350	94.81 ± 1.1	95.46 ± 1.14	0.0263
ATP11A	184.88 ± 37.83	155.3 ± 30.46	0.00262	0.0358	cg01229865	76.77 ± 4.83	80.42 ± 4.75	0.0264
ATP11A	184.88 ± 37.83	155.3 ± 30.46	0.00262	0.0358	cg24199463	71.19 ± 4.72	73.74 ± 3.85	0.0295
ATP11A	184.88 ± 37.83	155.3 ± 30.46	0.00262	0.0358	cg01161842	86.5 ± 2.93	88.72 ± 2.68	0.0297
ATP11A	184.88 ± 37.83	155.3 ± 30.46	0.00262	0.0358	cg22260762	88.66 ± 1.56	89.66 ± 1.01	0.0302
ATP11A	184.88 ± 37.83	155.3 ± 30.46	0.00262	0.0358	cg03356537	58.02 ± 13.98	61.91 ± 13.73	0.0332
ATP11A	184.88 ± 37.83	155.3 ± 30.46	0.00262	0.0358	cg17314961	95.77 ± 0.67	96.37 ± 0.54	0.0335
ATP11A	184.88 ± 37.83	155.3 ± 30.46	0.00262	0.0358	cg25647089	90.28 ± 2.91	91.79 ± 2.03	0.0337
ATP11A	184.88 ± 37.83	155.3 ± 30.46	0.00262	0.0358	cg13394990	82.71 ± 2.55	84.95 ± 2.16	0.0345
ATP11A	184.88 ± 37.83	155.3 ± 30.46	0.00262	0.0358	cg01744729	90.93 ± 1.66	92.35 ± 2.16	0.0361
ATP11A	184.88 ± 37.83	155.3 ± 30.46	0.00262	0.0358	cg15282087	89.09 ± 1.7	90.32 ± 1.15	0.0371
ATP11A	184.88 ± 37.83	155.3 ± 30.46	0.00262	0.0358	cg14807553	83.13 ± 5.63	85.51 ± 6.13	0.0373
ATP11A	184.88 ± 37.83	155.3 ± 30.46	0.00262	0.0358	cg26728334	55.61 ± 9.08	58.92 ± 9.66	0.0381
ATP11A	184.88 ± 37.83	155.3 ± 30.46	0.00262	0.0358	cg16523590	65.37 ± 10.51	69.21 ± 9.74	0.0393
ATP11A	184.88 ± 37.83	155.3 ± 30.46	0.00262	0.0358	cg21163969	72.31 ± 14.19	76.33 ± 12.3	0.0422
ATP11A	184.88 ± 37.83	155.3 ± 30.46	0.00262	0.0358	cg03450076	91.27 ± 1.34	92.2 ± 0.84	0.0444
ATP11A	184.88 ± 37.83	155.3 ± 30.46	0.00262	0.0358	cg09507215	80.36 ± 2.82	82.67 ± 3.03	0.0456
ATP11A	184.88 ± 37.83	155.3 ± 30.46	0.00262	0.0358	cg03786846	94.63 ± 0.89	95.44 ± 0.81	0.047
ATP11A	184.88 ± 37.83	155.3 ± 30.46	0.00262	0.0358	cg12194594	53.4 ± 14.55	48.36 ± 16.59	0.0491
ATP11C	95.57 ± 24.02	84.14 ± 19.43	0.00334	0.0413	cg18433694	82.23 ± 6.55	84.77 ± 7.18	0.00106
ATP11C	95.57 ± 24.02	84.14 ± 19.43	0.00334	0.0413	cg21757436	77.97 ± 12.94	81.36 ± 12.68	0.00956
ATP1A1	4681.48 ± 695.34	3941.93 ± 726.68	5.18e-05	0.00512	cg14837635	94.42 ± 0.92	95.2 ± 1.25	0.0115
ATP1A1	4681.48 ± 695.34	3941.93 ± 726.68	5.18e-05	0.00512	cg19102404	56.53 ± 12.73	60.26 ± 12.39	0.0462
ATP1A3	95.91 ± 18.47	83.47 ± 14.08	0.00285	0.0375	cg05628771	10.01 ± 1.76	11.14 ± 1.48	0.0202
ATP1A3	95.91 ± 18.47	83.47 ± 14.08	0.00285	0.0375	cg19864416	14.74 ± 1.31	13.58 ± 1.2	0.0313
ATP2A3	657.45 ± 313.21	558.63 ± 275.7	0.00318	0.04	cg17189020	85.38 ± 2.15	87.25 ± 1.97	0.00355
ATP2A3	657.45 ± 313.21	558.63 ± 275.7	0.00318	0.04	cg23181573	42.15 ± 14.27	48.17 ± 15.23	0.00387
ATP2A3	657.45 ± 313.21	558.63 ± 275.7	0.00318	0.04	cg18963239	44.06 ± 12.42	48.87 ± 13.99	0.00718
ATP2A3	657.45 ± 313.21	558.63 ± 275.7	0.00318	0.04	cg05158913	77.33 ± 5.34	79.03 ± 4.97	0.00823
ATP2A3	657.45 ± 313.21	558.63 ± 275.7	0.00318	0.04	cg09591406	70.72 ± 9.8	74.77 ± 6.87	0.00942
ATP2A3	657.45 ± 313.21	558.63 ± 275.7	0.00318	0.04	cg13498284	65.54 ± 7.88	67.76 ± 8.26	0.0139
ATP2A3	657.45 ± 313.21	558.63 ± 275.7	0.00318	0.04	cg20692730	81.2 ± 5.58	83.8 ± 5.47	0.0148
ATP2A3	657.45 ± 313.21	558.63 ± 275.7	0.00318	0.04	cg18201630	91.45 ± 2.3	92.45 ± 1.36	0.0309
ATP6V0E1	2813.28 ± 160.85	2656.17 ± 191.27	0.0043	0.0473	cg26415023	62.69 ± 1.77	64.01 ± 1.37	0.0151
ATP6V0E1	2813.28 ± 160.85	2656.17 ± 191.27	0.0043	0.0473	cg05201300	26.78 ± 7.1	31.36 ± 7.59	0.0159
ATP6V0E1	2813.28 ± 160.85	2656.17 ± 191.27	0.0043	0.0473	cg22907189	71.82 ± 5.07	75.11 ± 4.08	0.0167
ATP6V0E1	2813.28 ± 160.85	2656.17 ± 191.27	0.0043	0.0473	cg02589459	4.31 ± 0.8	3.78 ± 0.48	0.0209
ATP6V0E1	2813.28 ± 160.85	2656.17 ± 191.27	0.0043	0.0473	cg23234674	84.8 ± 6.22	86.81 ± 6.45	0.0288
ATP6V0E1	2813.28 ± 160.85	2656.17 ± 191.27	0.0043	0.0473	cg05595191	73.11 ± 10.12	77.06 ± 9.46	0.0307
ATP6V0E1	2813.28 ± 160.85	2656.17 ± 191.27	0.0043	0.0473	cg19870567	83.65 ± 4.12	86.65 ± 5.34	0.0354
ATP8B1	660.21 ± 207.12	504.93 ± 185.89	2.66e-05	0.00409	cg16852357	87.74 ± 2.97	90.43 ± 2.12	0.0101
ATP8B1	660.21 ± 207.12	504.93 ± 185.89	2.66e-05	0.00409	cg16771467	97.17 ± 0.3	97.52 ± 0.48	0.0309
ATP8B1	660.21 ± 207.12	504.93 ± 185.89	2.66e-05	0.00409	cg18439779	89.35 ± 1.15	90.67 ± 2.24	0.0473
ATXN7L1	52.33 ± 3.79	47.24 ± 4.14	0.00286	0.0376	cg05424831	96.47 ± 0.86	97.25 ± 0.51	0.000619
ATXN7L1	52.33 ± 3.79	47.24 ± 4.14	0.00286	0.0376	cg23105099	76.21 ± 4.67	81.31 ± 3.06	0.0021
ATXN7L1	52.33 ± 3.79	47.24 ± 4.14	0.00286	0.0376	cg21830726	94.92 ± 1.05	96.01 ± 0.53	0.00472
ATXN7L1	52.33 ± 3.79	47.24 ± 4.14	0.00286	0.0376	cg03775459	56.86 ± 14.74	62.56 ± 14.34	0.0221
ATXN7L1	52.33 ± 3.79	47.24 ± 4.14	0.00286	0.0376	cg10575219	43.45 ± 13.24	40.03 ± 12.14	0.0222
ATXN7L1	52.33 ± 3.79	47.24 ± 4.14	0.00286	0.0376	cg11932891	81.06 ± 2.97	82.59 ± 2.44	0.0325
AUTS2	50.54 ± 6.14	43.12 ± 4.22	0.00393	0.0449	cg04601228	62 ± 7.02	66.47 ± 7.08	0.00259
AUTS2	50.54 ± 6.14	43.12 ± 4.22	0.00393	0.0449	cg05970317	72.84 ± 4.78	75.89 ± 4.63	0.0133
AUTS2	50.54 ± 6.14	43.12 ± 4.22	0.00393	0.0449	cg17892069	36.17 ± 4.41	39.07 ± 5.85	0.0153
AUTS2	50.54 ± 6.14	43.12 ± 4.22	0.00393	0.0449	cg20295702	95.71 ± 0.69	96.19 ± 0.86	0.0218
AUTS2	50.54 ± 6.14	43.12 ± 4.22	0.00393	0.0449	cg01471203	94.58 ± 1.13	95.69 ± 1.09	0.023
AUTS2	50.54 ± 6.14	43.12 ± 4.22	0.00393	0.0449	cg08676249	5.94 ± 1.41	5.07 ± 1.07	0.027
AUTS2	50.54 ± 6.14	43.12 ± 4.22	0.00393	0.0449	cg01119700	92.16 ± 1.81	93.7 ± 1.11	0.03
AUTS2	50.54 ± 6.14	43.12 ± 4.22	0.00393	0.0449	cg21757212	68.36 ± 4.31	70.55 ± 4.09	0.0336
AUTS2	50.54 ± 6.14	43.12 ± 4.22	0.00393	0.0449	cg17146029	93.75 ± 1.99	95.07 ± 2.05	0.0364
AUTS2	50.54 ± 6.14	43.12 ± 4.22	0.00393	0.0449	cg13660655	4.18 ± 0.43	3.78 ± 0.53	0.0438
AUTS2	50.54 ± 6.14	43.12 ± 4.22	0.00393	0.0449	cg03803008	95.8 ± 0.61	96.19 ± 0.62	0.0488
B3GALT5	65.64 ± 18.49	49.53 ± 9.41	0.00414	0.0464	cg11479877	77.83 ± 16.41	73.95 ± 17.9	0.0474
B4GALT5	639.74 ± 143.11	522.67 ± 170.95	6.39e-05	0.00549	cg27403406	58.27 ± 11.31	53.19 ± 12.12	0.00445
B4GALT5	639.74 ± 143.11	522.67 ± 170.95	6.39e-05	0.00549	cg03655771	9.85 ± 1.25	8.2 ± 1.81	0.0286
B4GALT5	639.74 ± 143.11	522.67 ± 170.95	6.39e-05	0.00549	cg19707654	4.23 ± 0.67	3.78 ± 0.6	0.0367
B9D1	89.17 ± 10.57	106.55 ± 18.85	0.00435	0.0476	cg21097105	4.73 ± 0.51	4.34 ± 0.49	0.018
B9D1	89.17 ± 10.57	106.55 ± 18.85	0.00435	0.0476	cg11617818	75.17 ± 3.61	77.47 ± 3.81	0.0317
B9D1	89.17 ± 10.57	106.55 ± 18.85	0.00435	0.0476	cg14209627	4.57 ± 0.69	4.15 ± 0.78	0.0376
BARD1	84.48 ± 25.92	69.51 ± 21.38	0.000551	0.0154	cg04737361	6.23 ± 0.56	5.58 ± 1.08	0.0476
BAT5	149.07 ± 20.66	169.36 ± 31	0.00106	0.0218	cg02072940	70.43 ± 3.88	73.83 ± 4.38	0.00336
BAT5	150.92 ± 20.97	171.56 ± 31.08	0.00115	0.023	cg02072940	70.43 ± 3.88	73.83 ± 4.38	0.00336
BAT5	149.07 ± 20.66	169.36 ± 31	0.00106	0.0218	cg14986464	14.99 ± 5.61	18 ± 6.8	0.011
BAT5	150.92 ± 20.97	171.56 ± 31.08	0.00115	0.023	cg14986464	14.99 ± 5.61	18 ± 6.8	0.011
BAT5	149.07 ± 20.66	169.36 ± 31	0.00106	0.0218	cg05911220	3.69 ± 0.53	4.21 ± 0.38	0.0116
BAT5	150.92 ± 20.97	171.56 ± 31.08	0.00115	0.023	cg05911220	3.69 ± 0.53	4.21 ± 0.38	0.0116
BAT5	149.07 ± 20.66	169.36 ± 31	0.00106	0.0218	cg18505959	7.69 ± 0.87	8.58 ± 1.08	0.0203
BAT5	150.92 ± 20.97	171.56 ± 31.08	0.00115	0.023	cg18505959	7.69 ± 0.87	8.58 ± 1.08	0.0203
BAT5	149.07 ± 20.66	169.36 ± 31	0.00106	0.0218	cg12048617	61.18 ± 3.22	64 ± 2.44	0.0215
BAT5	150.92 ± 20.97	171.56 ± 31.08	0.00115	0.023	cg12048617	61.18 ± 3.22	64 ± 2.44	0.0215
BAT5	149.07 ± 20.66	169.36 ± 31	0.00106	0.0218	cg19713109	53.27 ± 15.19	59.08 ± 15.05	0.0247
BAT5	150.92 ± 20.97	171.56 ± 31.08	0.00115	0.023	cg19713109	53.27 ± 15.19	59.08 ± 15.05	0.0247
BAT5	149.07 ± 20.66	169.36 ± 31	0.00106	0.0218	cg06987944	73.13 ± 5.11	74.61 ± 4.76	0.0284
BAT5	150.92 ± 20.97	171.56 ± 31.08	0.00115	0.023	cg06987944	73.13 ± 5.11	74.61 ± 4.76	0.0284
BAT5	149.07 ± 20.66	169.36 ± 31	0.00106	0.0218	cg13961400	37.38 ± 3.11	38.74 ± 3.62	0.0462
BAT5	150.92 ± 20.97	171.56 ± 31.08	0.00115	0.023	cg13961400	37.38 ± 3.11	38.74 ± 3.62	0.0462
BAT5	149.07 ± 20.66	169.36 ± 31	0.00106	0.0218	cg02741419	2.52 ± 0.21	2.84 ± 0.56	0.047
BAT5	150.92 ± 20.97	171.56 ± 31.08	0.00115	0.023	cg02741419	2.52 ± 0.21	2.84 ± 0.56	0.047
BAT5	149.07 ± 20.66	169.36 ± 31	0.00106	0.0218	cg22666687	2.86 ± 0.5	3.39 ± 0.63	0.0491
BAT5	150.92 ± 20.97	171.56 ± 31.08	0.00115	0.023	cg22666687	2.86 ± 0.5	3.39 ± 0.63	0.0491
BBS2	477.74 ± 118.37	408.28 ± 79.46	0.000642	0.0168	cg13097319	2.97 ± 0.48	2.21 ± 0.43	0.00121
BBS2	477.74 ± 118.37	408.28 ± 79.46	0.000642	0.0168	cg06249486	13.56 ± 1.58	15.2 ± 2.15	0.00229
BBS2	477.74 ± 118.37	408.28 ± 79.46	0.000642	0.0168	cg07280206	29.84 ± 2.12	31.66 ± 3.29	0.0234
BCAM	148.71 ± 31.32	129.36 ± 27.07	0.000196	0.00929	cg12249345	86.85 ± 2.71	88.78 ± 1.69	0.00486
BCAM	148.71 ± 31.32	129.36 ± 27.07	0.000196	0.00929	cg23318764	71.44 ± 3.38	73.47 ± 3.9	0.0412
BCL11A	92.77 ± 13.83	78.17 ± 11.53	0.00148	0.0263	cg17935536	48.94 ± 6.85	51.34 ± 7.84	0.00395
BCL11A	92.77 ± 13.83	78.17 ± 11.53	0.00148	0.0263	cg22445742	55.18 ± 6.23	58.28 ± 6.24	0.00577
BCL11A	92.77 ± 13.83	78.17 ± 11.53	0.00148	0.0263	cg23556108	77.54 ± 3.94	80.24 ± 3.74	0.0209
BCL11A	92.77 ± 13.83	78.17 ± 11.53	0.00148	0.0263	cg16905255	7.46 ± 0.57	7.06 ± 0.46	0.0226
BCL2L11	58.41 ± 12.91	53.05 ± 13.27	0.00363	0.0429	cg27591920	70.85 ± 11.6	75.75 ± 9.79	0.00996
BCL2L13	286.07 ± 33.39	319.03 ± 37.58	0.00391	0.0448	cg10625092	3.38 ± 0.76	2.95 ± 0.82	0.0483
BCL2L15	169.89 ± 63.63	126.78 ± 47.12	0.00175	0.0289	cg24550026	66.66 ± 18.05	61.77 ± 19.88	0.0134
BCL2L15	169.89 ± 63.63	126.78 ± 47.12	0.00175	0.0289	cg03325407	57.96 ± 18.83	52.4 ± 18.81	0.024
BCL2L15	169.89 ± 63.63	126.78 ± 47.12	0.00175	0.0289	cg18941151	91.78 ± 1.92	93.31 ± 2.77	0.0296
BCL2L15	169.89 ± 63.63	126.78 ± 47.12	0.00175	0.0289	cg13991834	70.72 ± 19.42	66.81 ± 19.28	0.0327
BCR	92.05 ± 8.68	85.95 ± 10.21	0.000363	0.0126	cg17570939	92.66 ± 1.15	93.94 ± 1.23	0.0355
BCR	325.38 ± 30.21	291.26 ± 30.58	0.00431	0.0474	cg17570939	92.66 ± 1.15	93.94 ± 1.23	0.0355
BCR	92.05 ± 8.68	85.95 ± 10.21	0.000363	0.0126	cg01950479	89.1 ± 1.97	90.35 ± 1.51	0.049
BCR	325.38 ± 30.21	291.26 ± 30.58	0.00431	0.0474	cg01950479	89.1 ± 1.97	90.35 ± 1.51	0.049
BDKRB2	147.34 ± 33.52	127.91 ± 41.52	0.00054	0.0154	cg05050072	94.1 ± 1.77	95.32 ± 1.17	0.00357
BDKRB2	147.34 ± 33.52	127.91 ± 41.52	0.00054	0.0154	cg13515881	8.36 ± 1.8	7.1 ± 2.16	0.00898
BDKRB2	147.34 ± 33.52	127.91 ± 41.52	0.00054	0.0154	cg14032667	73.39 ± 4.35	75.88 ± 3.6	0.0163
BDKRB2	147.34 ± 33.52	127.91 ± 41.52	0.00054	0.0154	cg24010952	14.16 ± 2.24	16.1 ± 2.83	0.0193
BDKRB2	147.34 ± 33.52	127.91 ± 41.52	0.00054	0.0154	cg15892963	2.6 ± 0.4	3.15 ± 0.93	0.038
BEST1	33 ± 2.88	46.03 ± 11.5	0.00102	0.0214	cg16084190	50.76 ± 6.33	54.6 ± 5.93	0.0454
BET1L	156.66 ± 15.41	179.72 ± 13.89	0.000449	0.014	cg03115072	4.66 ± 0.54	3.89 ± 0.76	0.00945
BET1L	156.66 ± 15.41	179.72 ± 13.89	0.000449	0.014	cg25796445	2.42 ± 0.34	2.22 ± 0.32	0.0454
BET1L	156.66 ± 15.41	179.72 ± 13.89	0.000449	0.014	cg27331343	87.96 ± 4.28	86.82 ± 3.02	0.0484
BEX2	296.54 ± 74.45	346.42 ± 79.87	0.00447	0.0484	cg19474517	65.06 ± 8.56	68.62 ± 7.85	0.0217
BEX2	296.54 ± 74.45	346.42 ± 79.87	0.00447	0.0484	cg24765005	11.91 ± 12.24	10.82 ± 11.3	0.0449
BEX5	231.74 ± 49.24	301.95 ± 64.31	0.000223	0.00995	cg01386236	21.17 ± 21.66	22.23 ± 21.48	0.0361
BGN	472.35 ± 232.43	370.26 ± 181.68	4.99e-05	0.00511	cg16847374	73.12 ± 6.98	77.1 ± 6.27	0.00135
BGN	472.35 ± 232.43	370.26 ± 181.68	4.99e-05	0.00511	cg18986576	73.9 ± 3.92	77.21 ± 4.52	0.00777
BHLHA15	98.13 ± 7.2	112.02 ± 11.33	6.85e-06	0.00232	cg20061890	43.72 ± 4.44	45.71 ± 4.82	0.0151
BHLHE41	284.8 ± 52.83	228.09 ± 45.64	0.000188	0.00917	cg13515269	42.59 ± 6.49	48.31 ± 8.21	0.0214
BHLHE41	284.8 ± 52.83	228.09 ± 45.64	0.000188	0.00917	cg10049913	6.94 ± 0.71	6.28 ± 0.75	0.0472
BICC1	464.74 ± 188.96	375.66 ± 169	6.59e-05	0.00558	cg07857251	3.56 ± 0.37	2.91 ± 0.43	0.00433
BICC1	464.74 ± 188.96	375.66 ± 169	6.59e-05	0.00558	cg14168713	91.9 ± 1.71	93.51 ± 1.3	0.00767
BICC1	464.74 ± 188.96	375.66 ± 169	6.59e-05	0.00558	cg17548395	56.88 ± 11.47	63.27 ± 12.02	0.0184
BICC1	464.74 ± 188.96	375.66 ± 169	6.59e-05	0.00558	cg00820740	86.46 ± 7.23	80.6 ± 10.36	0.0262
BICC1	464.74 ± 188.96	375.66 ± 169	6.59e-05	0.00558	cg16012388	77.41 ± 10.41	71.61 ± 12.6	0.0264
BICC1	464.74 ± 188.96	375.66 ± 169	6.59e-05	0.00558	cg12342675	62.33 ± 6.95	65.85 ± 6.61	0.0274
BICC1	464.74 ± 188.96	375.66 ± 169	6.59e-05	0.00558	cg27235228	69.9 ± 8.05	66.93 ± 8.31	0.033
BID	164.12 ± 21.8	148.56 ± 19.91	0.00236	0.0337	cg15763497	7.77 ± 0.92	6.97 ± 0.83	0.0297
BID	164.12 ± 21.8	148.56 ± 19.91	0.00236	0.0337	cg09896131	84.49 ± 4.74	86.9 ± 3.15	0.0429
BIRC5	52.71 ± 6.91	44.84 ± 4.73	0.00234	0.0336	cg00017271	87 ± 2.54	89.09 ± 2.38	0.00652
BIRC5	52.71 ± 6.91	44.84 ± 4.73	0.00234	0.0336	cg21070864	3.3 ± 0.29	3.04 ± 0.26	0.0315
BIRC5	52.71 ± 6.91	44.84 ± 4.73	0.00234	0.0336	cg10140240	94.05 ± 1.53	94.76 ± 1.26	0.0345
BMF	126.61 ± 27.33	100.73 ± 24.19	5.38e-05	0.00519	cg15269751	3.09 ± 0.38	2.82 ± 0.22	0.0193
BMF	126.61 ± 27.33	100.73 ± 24.19	5.38e-05	0.00519	cg07712904	90.83 ± 7.55	90.1 ± 7.26	0.0228
BMF	126.61 ± 27.33	100.73 ± 24.19	5.38e-05	0.00519	cg09587957	40.61 ± 9.42	38.08 ± 9.14	0.0371
BMF	126.61 ± 27.33	100.73 ± 24.19	5.38e-05	0.00519	cg18494902	79.61 ± 14.55	76.8 ± 14.62	0.0476
BMP1	168.49 ± 26.69	147.53 ± 18.73	0.00303	0.0388	cg01753327	92.56 ± 1.74	93.52 ± 0.96	0.00525
BMP1	168.49 ± 26.69	147.53 ± 18.73	0.00303	0.0388	cg21054655	75.54 ± 1.77	77.4 ± 1.42	0.0189
BMP1	168.49 ± 26.69	147.53 ± 18.73	0.00303	0.0388	cg23666300	81.66 ± 1.9	83.11 ± 1.96	0.0325
BMP1	168.49 ± 26.69	147.53 ± 18.73	0.00303	0.0388	cg07242414	14.48 ± 2.04	13.6 ± 2.3	0.0395
BMP1	168.49 ± 26.69	147.53 ± 18.73	0.00303	0.0388	cg15127863	92.08 ± 1.96	93.22 ± 1.13	0.0426
BMP1	168.49 ± 26.69	147.53 ± 18.73	0.00303	0.0388	cg18544058	94.1 ± 1.4	94.97 ± 1.46	0.0477
BMS1	864.37 ± 172.19	940.08 ± 181.57	0.0031	0.0395	cg05454446	30.34 ± 5.56	31.86 ± 5.36	0.0219
BNIP1	61.22 ± 6.15	77.34 ± 10.11	5.6e-05	0.00531	cg21080251	92.52 ± 1.32	93.93 ± 0.83	0.00631
BNIP1	61.22 ± 6.15	77.34 ± 10.11	5.6e-05	0.00531	cg10491368	84.7 ± 2.17	87.4 ± 1.42	0.00866
BRCA2	24.14 ± 6.38	20.39 ± 5.06	0.000582	0.0159	cg23628297	77.96 ± 3.78	82.65 ± 2.79	0.00117
BRCA2	24.14 ± 6.38	20.39 ± 5.06	0.000582	0.0159	cg06935361	96.87 ± 0.73	97.62 ± 0.65	0.0123
BRCA2	24.14 ± 6.38	20.39 ± 5.06	0.000582	0.0159	cg25753010	5.46 ± 2.24	6.66 ± 2.97	0.0167
BRD7	70.74 ± 14.3	86.29 ± 14.49	0.000291	0.0112	cg16435316	76.96 ± 4.03	81.32 ± 4.55	0.000604
BRI3BP	247.88 ± 33.97	217.8 ± 20.32	0.00231	0.0334	cg23954819	6.16 ± 1.02	5.41 ± 0.8	0.0118
BRP44L	529.39 ± 72.02	578.27 ± 87.22	0.00236	0.0337	cg26904999	2.15 ± 0.17	2.44 ± 0.33	0.00196
BRP44L	529.39 ± 72.02	578.27 ± 87.22	0.00236	0.0337	cg01999051	55.47 ± 9.51	50.33 ± 11.6	0.0122
BRP44L	529.39 ± 72.02	578.27 ± 87.22	0.00236	0.0337	cg11811655	3.45 ± 0.63	2.91 ± 0.75	0.0262
BTG3	624.38 ± 128.47	709.27 ± 83.83	0.00299	0.0385	cg03232933	59.19 ± 4.42	62.39 ± 3.69	0.00503
BTG3	624.38 ± 128.47	709.27 ± 83.83	0.00299	0.0385	cg02629111	93.58 ± 1.59	94.87 ± 1.89	0.0395
BTG3	624.38 ± 128.47	709.27 ± 83.83	0.00299	0.0385	cg23273752	2.66 ± 0.5	2.25 ± 0.3	0.0402
BUB1	39.84 ± 8.87	28.93 ± 6.69	0.00046	0.0142	cg02066650	8.84 ± 1.27	7.76 ± 1.05	0.0109
BUB1	39.84 ± 8.87	28.93 ± 6.69	0.00046	0.0142	cg23198623	58.75 ± 5.39	60.81 ± 5.72	0.027
BZW1L1	2359.37 ± 203.39	2555.33 ± 127.02	0.00038	0.0129	cg00047501	56.65 ± 9.92	61.57 ± 10.93	0.0223
BZW1L1	2359.37 ± 203.39	2555.33 ± 127.02	0.00038	0.0129	cg11357862	70.33 ± 6.16	75.03 ± 6.62	0.0316
C10orf58	735.86 ± 147.25	662.58 ± 107.96	0.00204	0.0313	cg05014245	57.65 ± 14.28	64.08 ± 14.96	0.00164
C10orf58	735.86 ± 147.25	662.58 ± 107.96	0.00204	0.0313	cg19862899	73.23 ± 7.62	77.17 ± 7.4	0.00227
C10orf58	735.86 ± 147.25	662.58 ± 107.96	0.00204	0.0313	cg02750471	89.72 ± 2.42	91.66 ± 2.14	0.00294
C10orf58	735.86 ± 147.25	662.58 ± 107.96	0.00204	0.0313	cg12069540	51.04 ± 8.68	54.52 ± 8.88	0.0207
C10orf58	735.86 ± 147.25	662.58 ± 107.96	0.00204	0.0313	cg06173833	78.65 ± 5.45	81.56 ± 5.4	0.0229
C10orf58	735.86 ± 147.25	662.58 ± 107.96	0.00204	0.0313	cg09203802	59.84 ± 4.12	62.85 ± 3.07	0.0281
C10orf58	735.86 ± 147.25	662.58 ± 107.96	0.00204	0.0313	cg07091481	43.18 ± 9.79	48.09 ± 10.2	0.0373
C10orf58	735.86 ± 147.25	662.58 ± 107.96	0.00204	0.0313	cg05327931	91.55 ± 1.43	92.17 ± 1.24	0.0436
C10orf58	735.86 ± 147.25	662.58 ± 107.96	0.00204	0.0313	cg03599037	44.93 ± 8.35	47.28 ± 9.48	0.045
C11orf10	1374.06 ± 212.5	1666.34 ± 314.11	0.000239	0.0102	cg03805684	37.99 ± 3.78	41.09 ± 3.53	0.000606
C11orf10	1374.06 ± 212.5	1666.34 ± 314.11	0.000239	0.0102	cg22704775	5.03 ± 0.72	4.09 ± 0.77	0.00431
C11orf10	1374.06 ± 212.5	1666.34 ± 314.11	0.000239	0.0102	cg18799266	3.5 ± 0.41	2.96 ± 0.47	0.015
C11orf10	1374.06 ± 212.5	1666.34 ± 314.11	0.000239	0.0102	cg25628257	2.92 ± 0.32	3.55 ± 0.97	0.0221
C11orf10	1374.06 ± 212.5	1666.34 ± 314.11	0.000239	0.0102	cg23960684	3.54 ± 0.47	3.92 ± 0.52	0.0225
C11orf10	1374.06 ± 212.5	1666.34 ± 314.11	0.000239	0.0102	cg14189245	1.79 ± 0.34	1.99 ± 0.26	0.0468
C11orf60	690.2 ± 99.92	766.22 ± 111.95	0.000399	0.013	cg20876055	2.56 ± 0.4	2.29 ± 0.27	0.0129
C11orf75	208.71 ± 23.84	249.6 ± 35.91	0.000964	0.0207	cg24641901	92.03 ± 1.74	93.73 ± 1.57	0.00115
C11orf75	208.71 ± 23.84	249.6 ± 35.91	0.000964	0.0207	cg08004131	97.3 ± 0.59	97.96 ± 0.53	0.0109
C11orf75	208.71 ± 23.84	249.6 ± 35.91	0.000964	0.0207	cg18076842	66.51 ± 12.85	70.04 ± 11.93	0.0283
C11orf75	208.71 ± 23.84	249.6 ± 35.91	0.000964	0.0207	cg16424440	92 ± 3.82	93.34 ± 2.89	0.0362
C11orf75	208.71 ± 23.84	249.6 ± 35.91	0.000964	0.0207	cg06895640	68.42 ± 6.36	70.64 ± 6.55	0.0413
C11orf9	126.29 ± 27.48	111.03 ± 28.04	0.00141	0.0256	cg18171955	90.95 ± 1.16	92.85 ± 1.61	0.000505
C11orf9	126.29 ± 27.48	111.03 ± 28.04	0.00141	0.0256	cg05881566	87.69 ± 3.99	85.73 ± 3.84	0.017
C11orf9	126.29 ± 27.48	111.03 ± 28.04	0.00141	0.0256	cg12690575	34.17 ± 4.28	32.49 ± 3.97	0.0247
C11orf9	126.29 ± 27.48	111.03 ± 28.04	0.00141	0.0256	cg07486017	83.32 ± 5.64	80.91 ± 6.41	0.0385
C11orf9	126.29 ± 27.48	111.03 ± 28.04	0.00141	0.0256	cg22115093	63.13 ± 4.14	60.28 ± 4.44	0.0482
C12orf48	11.33 ± 1.63	9.28 ± 2.77	0.000556	0.0155	cg19668010	91.3 ± 1.39	92.26 ± 1.37	0.0237
C12orf48	11.33 ± 1.63	9.28 ± 2.77	0.000556	0.0155	cg03502446	2.46 ± 0.43	2.65 ± 0.32	0.0459
C12orf66	126.85 ± 15.64	140.81 ± 17.42	0.00122	0.0236	cg08253970	3.12 ± 0.65	2.8 ± 0.59	0.0171
C13orf34	39.91 ± 7.71	47.07 ± 7.6	0.00163	0.0279	cg01431559	94.13 ± 1.54	95.5 ± 1.31	0.0154
C14orf1	710.96 ± 76.17	630.2 ± 44.84	0.00163	0.0279	cg20927952	3.95 ± 0.64	3.46 ± 0.42	0.0471
C14orf153	156.36 ± 19.56	177.44 ± 23.23	0.0034	0.0416	cg04689407	5.2 ± 0.67	4.72 ± 0.88	0.0283
C14orf153	156.36 ± 19.56	177.44 ± 23.23	0.0034	0.0416	cg15569512	2.1 ± 0.41	1.86 ± 0.38	0.0478
C14orf159	135.83 ± 28.18	117.01 ± 28.05	0.000955	0.0206	cg00806727	95.4 ± 0.64	96.24 ± 0.4	0.00175
C14orf159	135.83 ± 28.18	117.01 ± 28.05	0.000955	0.0206	cg01634664	12.08 ± 1.23	13.41 ± 1.74	0.0341
C14orf159	135.83 ± 28.18	117.01 ± 28.05	0.000955	0.0206	cg06907680	5.54 ± 1.61	6.56 ± 1.49	0.0489
C15orf24	900.8 ± 102.65	990.54 ± 98.61	0.000349	0.0123	cg13598528	3.62 ± 0.43	4.36 ± 0.6	0.000621
C15orf24	900.8 ± 102.65	990.54 ± 98.61	0.000349	0.0123	cg18099844	87.78 ± 1.72	89.2 ± 2.71	0.024
C15orf24	900.8 ± 102.65	990.54 ± 98.61	0.000349	0.0123	cg15287024	4.97 ± 1.47	6.29 ± 2.17	0.0371
C17orf28	256.09 ± 31.49	308.06 ± 50.77	0.000567	0.0157	cg07430967	59.32 ± 3.96	62.78 ± 5.03	0.00135
C17orf28	256.09 ± 31.49	308.06 ± 50.77	0.000567	0.0157	cg12349832	72.68 ± 4.38	75.9 ± 4.22	0.00747
C17orf28	256.09 ± 31.49	308.06 ± 50.77	0.000567	0.0157	cg24428040	41.21 ± 3.46	43.17 ± 3.45	0.0112
C17orf28	256.09 ± 31.49	308.06 ± 50.77	0.000567	0.0157	cg05865011	57.79 ± 5.38	61.65 ± 5.2	0.0123
C17orf28	256.09 ± 31.49	308.06 ± 50.77	0.000567	0.0157	cg18909235	91.56 ± 1.89	93.07 ± 1.46	0.0131
C17orf28	256.09 ± 31.49	308.06 ± 50.77	0.000567	0.0157	cg13923669	75.19 ± 5.08	78.24 ± 4.24	0.0257
C17orf91	135.66 ± 22.5	179.74 ± 28.35	0.000322	0.0119	cg25135801	6.91 ± 0.91	6.22 ± 1.07	0.0437
C17orf91	135.66 ± 22.5	179.74 ± 28.35	0.000322	0.0119	cg26697882	7.31 ± 1.78	6.4 ± 1.52	0.0451
C17orf91	135.66 ± 22.5	179.74 ± 28.35	0.000322	0.0119	cg26102512	5.78 ± 0.54	5.36 ± 0.46	0.0498
C18orf54	18.08 ± 3.43	15.16 ± 3.64	0.00408	0.046	cg00381076	3.86 ± 1.19	3.28 ± 0.72	0.047
C19orf30	485.64 ± 172.64	698.98 ± 206.46	2.36e-05	0.00392	cg21300318	29.1 ± 7.48	33.83 ± 8.32	0.00385
C19orf30	485.64 ± 172.64	698.98 ± 206.46	2.36e-05	0.00392	cg11351987	40.48 ± 10.19	43.69 ± 8.87	0.0242
C19orf30	485.64 ± 172.64	698.98 ± 206.46	2.36e-05	0.00392	cg02351925	73.43 ± 11	76.16 ± 9.09	0.027
C19orf30	485.64 ± 172.64	698.98 ± 206.46	2.36e-05	0.00392	cg27547281	36.14 ± 9.48	39.97 ± 11.08	0.0279
C19orf30	485.64 ± 172.64	698.98 ± 206.46	2.36e-05	0.00392	cg07353620	40.49 ± 12.56	44.16 ± 14.92	0.0322
C1orf122	131.28 ± 13.78	149.26 ± 18.65	0.00464	0.0495	cg11136250	11.4 ± 1.28	12.85 ± 2.17	0.0211
C1orf122	131.28 ± 13.78	149.26 ± 18.65	0.00464	0.0495	cg04411969	81.48 ± 1.89	83.24 ± 2.52	0.0385
C1orf194	42.28 ± 5.76	50.28 ± 8.92	0.00204	0.0313	cg26523099	57.54 ± 6.37	59.58 ± 6.93	0.0174
C1orf194	42.28 ± 5.76	50.28 ± 8.92	0.00204	0.0313	cg23599104	6.18 ± 1.57	6.8 ± 1.82	0.0184
C1orf27	292.92 ± 45.7	345.44 ± 46.89	0.000112	0.00726	cg24356321	14.57 ± 1.15	13.61 ± 1.68	0.011
C1orf27	292.92 ± 45.7	345.44 ± 46.89	0.000112	0.00726	cg20598063	10.6 ± 1.5	9.54 ± 1.39	0.0145
C1orf27	292.92 ± 45.7	345.44 ± 46.89	0.000112	0.00726	cg27342087	2.45 ± 0.36	2.15 ± 0.35	0.045
C1orf43	1613.15 ± 89.04	1812.12 ± 133.43	3.59e-05	0.00476	cg18262993	8.5 ± 1.17	9.48 ± 1.09	0.0126
C1orf43	1613.15 ± 89.04	1812.12 ± 133.43	3.59e-05	0.00476	cg09373211	7.11 ± 1.29	6.18 ± 1.09	0.0484
C1orf61	11.98 ± 2.36	13.78 ± 3.18	0.00199	0.031	cg26681458	79.3 ± 3.19	81.09 ± 2.45	0.00838
C1orf61	11.98 ± 2.36	13.78 ± 3.18	0.00199	0.031	cg09938227	33.6 ± 2.61	35.27 ± 2.56	0.0381
C1orf61	11.98 ± 2.36	13.78 ± 3.18	0.00199	0.031	cg10945917	27 ± 3.06	28 ± 2.68	0.0432
C1orf9	405.7 ± 66.25	475.31 ± 88.18	0.0021	0.0317	cg06963192	78.29 ± 5.47	82.82 ± 4.55	0.0101
C1orf9	405.7 ± 66.25	475.31 ± 88.18	0.0021	0.0317	cg00416727	80.61 ± 2.57	82.73 ± 1.78	0.0222
C1orf9	405.7 ± 66.25	475.31 ± 88.18	0.0021	0.0317	cg16301215	5.85 ± 0.86	5.11 ± 0.78	0.031
C1orf9	405.7 ± 66.25	475.31 ± 88.18	0.0021	0.0317	cg13483248	84.37 ± 4.2	87.17 ± 3.86	0.0413
C1QB	84.15 ± 22.16	67.12 ± 11.51	0.00388	0.0448	cg07012832	58.6 ± 5.73	61.83 ± 6.23	0.0165
C1QB	84.15 ± 22.16	67.12 ± 11.51	0.00388	0.0448	cg10088685	55.52 ± 8.44	58.89 ± 6.99	0.0337
C20orf111	235.21 ± 36.71	262.74 ± 54.03	0.000516	0.015	cg13681142	48.98 ± 3.39	51.97 ± 3.12	0.0134
C20orf111	235.21 ± 36.71	262.74 ± 54.03	0.000516	0.015	cg06466728	91.85 ± 3.24	89.9 ± 4.71	0.0141
C20orf199	512.34 ± 138.34	631.47 ± 172.32	0.000878	0.0199	cg14630947	4.21 ± 0.62	3.73 ± 0.57	0.00584
C20orf199	512.34 ± 138.34	631.47 ± 172.32	0.000878	0.0199	cg00759619	18.4 ± 3.88	15.15 ± 2.94	0.0104
C20orf199	512.34 ± 138.34	631.47 ± 172.32	0.000878	0.0199	cg23958863	5.33 ± 0.67	4.75 ± 0.68	0.0175
C20orf199	512.34 ± 138.34	631.47 ± 172.32	0.000878	0.0199	cg07513820	5.39 ± 0.63	4.94 ± 0.68	0.0467
C20orf199	512.34 ± 138.34	631.47 ± 172.32	0.000878	0.0199	cg01644741	45.05 ± 7.19	47.7 ± 6.33	0.0467
C20orf26	36.71 ± 9.36	51.87 ± 17.18	0.000301	0.0114	cg20430047	42.41 ± 4.13	46.56 ± 6.26	0.000633
C20orf26	36.71 ± 9.36	51.87 ± 17.18	0.000301	0.0114	cg23732608	24.71 ± 8.1	29.79 ± 10.35	0.00351
C20orf26	36.71 ± 9.36	51.87 ± 17.18	0.000301	0.0114	cg04275707	2.05 ± 0.45	1.61 ± 0.35	0.00422
C20orf26	36.71 ± 9.36	51.87 ± 17.18	0.000301	0.0114	cg11577716	32.56 ± 4.4	35.44 ± 5.74	0.00861
C20orf26	36.71 ± 9.36	51.87 ± 17.18	0.000301	0.0114	cg03223734	18 ± 5.52	20.03 ± 6.29	0.0117
C20orf26	36.71 ± 9.36	51.87 ± 17.18	0.000301	0.0114	cg11382945	53.74 ± 4.69	58.29 ± 3.28	0.0191
C21orf45	190.49 ± 28.59	170.85 ± 33.18	0.0011	0.0223	cg14179796	3.35 ± 0.72	3.97 ± 0.73	0.0252
C21orf45	190.49 ± 28.59	170.85 ± 33.18	0.0011	0.0223	cg08817937	2.71 ± 0.25	2.5 ± 0.29	0.044
C22orf13	302.33 ± 50.89	278.9 ± 48.56	0.00131	0.0246	cg03550508	4.07 ± 0.4	3.71 ± 0.39	0.00483
C22orf13	302.33 ± 50.89	278.9 ± 48.56	0.00131	0.0246	cg03503179	3.39 ± 1.06	2.79 ± 0.62	0.011
C22orf13	302.33 ± 50.89	278.9 ± 48.56	0.00131	0.0246	cg11459491	3.92 ± 0.67	3.41 ± 0.63	0.049
C22orf42	189.5 ± 84.49	252.88 ± 115.81	0.00317	0.0399	cg01558877	42.73 ± 7.93	49.13 ± 9.83	0.000956
C22orf42	189.5 ± 84.49	252.88 ± 115.81	0.00317	0.0399	cg15381251	32.18 ± 6.54	35.52 ± 7.73	0.0155
C22orf42	189.5 ± 84.49	252.88 ± 115.81	0.00317	0.0399	cg01905056	69.78 ± 5.48	72.66 ± 6.17	0.0162
C22orf42	189.5 ± 84.49	252.88 ± 115.81	0.00317	0.0399	cg09084256	17.14 ± 3.49	19.64 ± 3.47	0.0271
C2orf39	16.61 ± 1.65	19.77 ± 3.59	0.00108	0.0221	cg01734112	6.35 ± 1.31	7.28 ± 1.06	0.0217
C2orf52	26.43 ± 3.32	32.18 ± 5.99	0.0047	0.0498	cg10281105	2.56 ± 0.31	2.04 ± 0.37	0.00138
C2orf52	26.43 ± 3.32	32.18 ± 5.99	0.0047	0.0498	cg07301105	51.4 ± 3.66	53.87 ± 4.05	0.0408
C3orf59	291.04 ± 55.6	262.1 ± 42.68	0.00124	0.0238	cg19511386	59.18 ± 3.89	61.59 ± 3.86	0.00402
C3orf59	291.04 ± 55.6	262.1 ± 42.68	0.00124	0.0238	cg06573945	93.69 ± 2.14	95.52 ± 1.45	0.00602
C3orf59	291.04 ± 55.6	262.1 ± 42.68	0.00124	0.0238	cg27495769	2.88 ± 0.47	2.36 ± 0.37	0.0133
C3orf59	291.04 ± 55.6	262.1 ± 42.68	0.00124	0.0238	cg10590657	88.32 ± 1.68	89.8 ± 2.1	0.0171
C3orf59	291.04 ± 55.6	262.1 ± 42.68	0.00124	0.0238	cg23661026	89.75 ± 2.06	91.43 ± 2.17	0.0208
C3orf59	291.04 ± 55.6	262.1 ± 42.68	0.00124	0.0238	cg23344395	93.18 ± 2.63	92.46 ± 2.64	0.0277
C3orf59	291.04 ± 55.6	262.1 ± 42.68	0.00124	0.0238	cg14991595	79.31 ± 3.11	81.39 ± 2.13	0.0355
C4orf29	220.76 ± 25.42	249.58 ± 20.01	0.000156	0.00832	cg06282462	4.19 ± 0.57	3.78 ± 0.34	0.0102
C4orf29	220.76 ± 25.42	249.58 ± 20.01	0.000156	0.00832	cg11867599	8.06 ± 0.92	7.15 ± 1.11	0.0219
C4orf29	220.76 ± 25.42	249.58 ± 20.01	0.000156	0.00832	cg12452946	6.05 ± 1.12	5.01 ± 0.7	0.0227
C4orf29	220.76 ± 25.42	249.58 ± 20.01	0.000156	0.00832	cg07327396	3.12 ± 0.65	2.58 ± 0.39	0.0266
C5orf13	300.14 ± 91.95	210.97 ± 60.6	4.78e-05	0.00509	cg23324888	7.15 ± 0.99	5.88 ± 1.02	0.00238
C5orf13	300.14 ± 91.95	210.97 ± 60.6	4.78e-05	0.00509	cg01242977	61.35 ± 13.82	67.99 ± 14.3	0.00586
C5orf13	300.14 ± 91.95	210.97 ± 60.6	4.78e-05	0.00509	cg26883434	83.22 ± 7.88	86.19 ± 5.82	0.00754
C5orf13	300.14 ± 91.95	210.97 ± 60.6	4.78e-05	0.00509	cg22562498	62.32 ± 6.78	65.62 ± 6.47	0.0126
C5orf13	300.14 ± 91.95	210.97 ± 60.6	4.78e-05	0.00509	cg04524006	3.64 ± 0.64	4.35 ± 0.9	0.0318
C5orf13	300.14 ± 91.95	210.97 ± 60.6	4.78e-05	0.00509	cg03877829	66.5 ± 5.3	69.87 ± 5.75	0.0321
C5orf13	300.14 ± 91.95	210.97 ± 60.6	4.78e-05	0.00509	cg11103273	93.6 ± 1.43	94.96 ± 1.33	0.0331
C6	79.29 ± 40.08	61.44 ± 45.09	0.00268	0.0362	cg11590974	52.53 ± 13.62	57.87 ± 14.82	0.0223
C6orf115	165.59 ± 25.69	148.34 ± 27.05	0.0013	0.0245	cg13265740	47.47 ± 13.36	53.54 ± 14.21	0.024
C6orf129	58.59 ± 9.03	72.85 ± 16.08	0.000497	0.0147	cg24148817	45.35 ± 4.15	47.09 ± 3.54	0.0224
C6orf225	81.33 ± 18.12	99.99 ± 26.81	0.0033	0.041	cg24455148	95.61 ± 1.33	96.36 ± 0.69	0.0439
C6orf225	81.33 ± 18.12	99.99 ± 26.81	0.0033	0.041	cg05668720	3.78 ± 0.53	3.27 ± 0.5	0.044
C6orf27	116.27 ± 24.82	140.33 ± 31.89	3.85e-05	0.00481	cg12425321	84.28 ± 1.68	86.02 ± 1.7	0.00547
C6orf27	116.27 ± 24.82	140.33 ± 31.89	3.85e-05	0.00481	cg17677678	81.54 ± 1.09	83.19 ± 1.72	0.0161
C6orf27	116.27 ± 24.82	140.33 ± 31.89	3.85e-05	0.00481	cg16587961	87.79 ± 2.35	89.61 ± 1.91	0.0174
C6orf27	116.27 ± 24.82	140.33 ± 31.89	3.85e-05	0.00481	cg01761478	68.54 ± 2.95	71.47 ± 2.21	0.0188
C6orf27	116.27 ± 24.82	140.33 ± 31.89	3.85e-05	0.00481	cg00686197	74.32 ± 4.77	77.37 ± 3.44	0.0218
C6orf27	116.27 ± 24.82	140.33 ± 31.89	3.85e-05	0.00481	cg19220566	68.37 ± 3.89	69.83 ± 3.69	0.0235
C6orf27	116.27 ± 24.82	140.33 ± 31.89	3.85e-05	0.00481	cg22112841	37.81 ± 7.36	36.35 ± 7.69	0.0493
C7orf29	78.1 ± 22.4	61.56 ± 17.11	0.000617	0.0163	cg16098921	91.35 ± 1.5	90.23 ± 1.47	0.0256
C9orf21	188.49 ± 49.75	226.78 ± 44.05	0.00125	0.0239	cg14591340	33.46 ± 14.04	40.29 ± 16	0.0132
C9orf25	98.01 ± 8.8	110.84 ± 11.05	0.000305	0.0115	cg06308323	57.86 ± 5.81	61.85 ± 6.38	0.00673
C9orf25	98.01 ± 8.8	110.84 ± 11.05	0.000305	0.0115	cg27344462	77.5 ± 3.64	80.13 ± 3.27	0.00754
C9orf25	98.01 ± 8.8	110.84 ± 11.05	0.000305	0.0115	cg04473280	58.11 ± 4.75	59.88 ± 4.8	0.0234
C9orf25	98.01 ± 8.8	110.84 ± 11.05	0.000305	0.0115	cg08578641	7.5 ± 3.81	8.48 ± 3.28	0.0345
C9orf25	98.01 ± 8.8	110.84 ± 11.05	0.000305	0.0115	cg13725752	45.12 ± 11.59	48.74 ± 12.62	0.0347
C9orf3	108.78 ± 14.9	127.69 ± 22.92	0.001	0.0211	cg13664635	80.18 ± 1.68	82.29 ± 2.03	0.000837
C9orf3	108.78 ± 14.9	127.69 ± 22.92	0.001	0.0211	cg14503441	15.45 ± 1.29	18.31 ± 3.78	0.00679
C9orf3	108.78 ± 14.9	127.69 ± 22.92	0.001	0.0211	cg13972491	77.33 ± 5.29	79.75 ± 5.16	0.00804
C9orf3	108.78 ± 14.9	127.69 ± 22.92	0.001	0.0211	cg20555778	97.02 ± 0.56	97.57 ± 0.68	0.00962
C9orf3	108.78 ± 14.9	127.69 ± 22.92	0.001	0.0211	cg13490575	63.94 ± 13.14	69.37 ± 13.05	0.0145
C9orf3	108.78 ± 14.9	127.69 ± 22.92	0.001	0.0211	cg08849095	78.87 ± 3.91	80.97 ± 5.45	0.0405
C9orf3	108.78 ± 14.9	127.69 ± 22.92	0.001	0.0211	cg00351472	85.39 ± 3.49	87.76 ± 2.13	0.0458
C9orf5	965.61 ± 74.75	850.15 ± 92.96	0.00231	0.0333	cg04062823	2.62 ± 0.59	2 ± 0.36	0.00515
C9orf5	965.61 ± 74.75	850.15 ± 92.96	0.00231	0.0333	cg14384093	67.46 ± 15.57	62.63 ± 16.04	0.0258
C9orf5	965.61 ± 74.75	850.15 ± 92.96	0.00231	0.0333	cg11727569	57.31 ± 5.28	60.15 ± 6.39	0.0346
C9orf7	164.05 ± 20.36	145.16 ± 18.33	0.00395	0.0451	cg13561918	74.86 ± 3.72	77.39 ± 3.01	0.00118
C9orf7	164.05 ± 20.36	145.16 ± 18.33	0.00395	0.0451	cg08004162	2.89 ± 0.45	2.55 ± 0.5	0.022
C9orf72	209.98 ± 36.36	253.13 ± 40.49	0.000706	0.0176	cg13934990	95.08 ± 1.45	96.63 ± 0.76	0.00267
CA10	31.27 ± 4.91	38.19 ± 10.03	0.00257	0.0355	cg11144436	94.14 ± 0.62	94.89 ± 0.69	0.00342
CA10	31.27 ± 4.91	38.19 ± 10.03	0.00257	0.0355	cg19805005	59.97 ± 15.84	54.92 ± 15.5	0.0269
CA2	212.94 ± 61.78	165.59 ± 62.07	0.00222	0.0325	cg12470625	3.12 ± 0.59	3.61 ± 0.4	0.0309
CA2	212.94 ± 61.78	165.59 ± 62.07	0.00222	0.0325	cg08872550	32.03 ± 10.28	28.88 ± 10.1	0.0331
CACNB2	155.55 ± 49.04	178.77 ± 59.54	0.00365	0.043	cg18959207	26.3 ± 8.44	30.32 ± 9.81	0.000846
CACNB2	155.55 ± 49.04	178.77 ± 59.54	0.00365	0.043	cg01373602	6.8 ± 4.3	9.21 ± 5.68	0.000936
CACNB2	155.55 ± 49.04	178.77 ± 59.54	0.00365	0.043	cg04968013	96 ± 0.85	96.75 ± 0.85	0.00288
CACNB2	155.55 ± 49.04	178.77 ± 59.54	0.00365	0.043	cg14716734	72.16 ± 6.43	75.95 ± 6.9	0.0113
CACNB2	155.55 ± 49.04	178.77 ± 59.54	0.00365	0.043	cg05719612	27.25 ± 6.85	29.66 ± 6.28	0.016
CACNB2	155.55 ± 49.04	178.77 ± 59.54	0.00365	0.043	cg00476617	63.58 ± 12.6	68.13 ± 12.82	0.0336
CACNB2	155.55 ± 49.04	178.77 ± 59.54	0.00365	0.043	cg03445965	90.4 ± 1.98	92.02 ± 1.64	0.0398
CACNB2	155.55 ± 49.04	178.77 ± 59.54	0.00365	0.043	cg07731871	29.88 ± 7.39	32.46 ± 7.87	0.0466
CACNB2	155.55 ± 49.04	178.77 ± 59.54	0.00365	0.043	cg20546601	83.61 ± 5.1	81.28 ± 5.34	0.0478
CADM1	436.1 ± 107.56	491.5 ± 119.79	3.87e-05	0.00481	cg16061656	64.79 ± 6.97	69.91 ± 6.13	0.000809
CADM1	436.1 ± 107.56	491.5 ± 119.79	3.87e-05	0.00481	cg13790125	69.84 ± 13.06	77.58 ± 10.61	0.00198
CADM1	436.1 ± 107.56	491.5 ± 119.79	3.87e-05	0.00481	cg14201467	46.28 ± 11.18	52.9 ± 10.27	0.00363
CADM1	436.1 ± 107.56	491.5 ± 119.79	3.87e-05	0.00481	cg14944514	5.54 ± 0.52	6.3 ± 0.89	0.0132
CADM1	436.1 ± 107.56	491.5 ± 119.79	3.87e-05	0.00481	cg25195288	11.31 ± 2.24	12.91 ± 1.7	0.0161
CADM1	436.1 ± 107.56	491.5 ± 119.79	3.87e-05	0.00481	cg24311416	61.2 ± 7.15	65.54 ± 7.36	0.0209
CADM1	436.1 ± 107.56	491.5 ± 119.79	3.87e-05	0.00481	cg27029179	7.06 ± 0.62	6.22 ± 1.27	0.0216
CADM1	436.1 ± 107.56	491.5 ± 119.79	3.87e-05	0.00481	cg03505501	30.31 ± 3.78	34.37 ± 7.84	0.0246
CADM1	436.1 ± 107.56	491.5 ± 119.79	3.87e-05	0.00481	cg19978728	90.62 ± 3.93	92.66 ± 4.35	0.0304
CADM1	436.1 ± 107.56	491.5 ± 119.79	3.87e-05	0.00481	cg10553088	23.45 ± 9.32	28.9 ± 12.23	0.0407
CADM1	436.1 ± 107.56	491.5 ± 119.79	3.87e-05	0.00481	cg05125455	53.67 ± 13.3	60.33 ± 10.76	0.0431
CAMK2N1	1133.99 ± 260.25	1015.55 ± 203.37	0.000331	0.012	cg19283960	3.67 ± 0.32	3.36 ± 0.27	0.0176
CANX	4770.59 ± 410.65	5121.96 ± 285.54	0.0024	0.0341	cg04073204	90.57 ± 3.89	92.82 ± 1.5	0.0389
CANX	4770.59 ± 410.65	5121.96 ± 285.54	0.0024	0.0341	cg03868400	4.92 ± 0.8	4.49 ± 0.84	0.0404
CAP1	2501.28 ± 226.39	2355.35 ± 248.31	0.00114	0.0228	cg05303289	4.23 ± 0.62	3.84 ± 0.62	0.0239
CAPN6	119.02 ± 35.19	104.74 ± 36.89	0.00341	0.0416	cg03509908	91.35 ± 5.72	92.23 ± 5.2	0.019
CAPNS1	1854.8 ± 140.09	1728.66 ± 155.53	0.00282	0.0373	cg22869224	60.81 ± 2.15	63 ± 2.51	0.0372
CAPNS1	1854.8 ± 140.09	1728.66 ± 155.53	0.00282	0.0373	cg21983579	2.44 ± 0.46	2.08 ± 0.3	0.0455
CAPRIN1	1904.79 ± 115.28	1715.54 ± 107.2	0.000598	0.0161	cg16614638	16.72 ± 1.6	15.43 ± 1.78	0.0108
CAPRIN1	1904.79 ± 115.28	1715.54 ± 107.2	0.000598	0.0161	cg23240149	10.02 ± 1.4	12.25 ± 2.37	0.0109
CAPRIN1	1904.79 ± 115.28	1715.54 ± 107.2	0.000598	0.0161	cg19019913	2.85 ± 0.62	2.39 ± 0.56	0.0179
CARD16	16.79 ± 5.01	12.62 ± 2.96	0.00264	0.036	cg16402635	92.67 ± 0.69	93.39 ± 1.5	0.0433
CARS	321.47 ± 39.48	377.56 ± 49.63	0.000698	0.0175	cg13442606	42.41 ± 5.59	47.36 ± 5.14	0.00147
CARS	321.47 ± 39.48	377.56 ± 49.63	0.000698	0.0175	cg01104590	54.99 ± 7.37	58.44 ± 8.59	0.00335
CARS	321.47 ± 39.48	377.56 ± 49.63	0.000698	0.0175	cg25174290	3.37 ± 1.17	4.18 ± 1.41	0.00805
CARS	321.47 ± 39.48	377.56 ± 49.63	0.000698	0.0175	cg25072766	27.81 ± 14.91	33.03 ± 17.58	0.0124
CARS	321.47 ± 39.48	377.56 ± 49.63	0.000698	0.0175	cg14935025	57.75 ± 14.89	64.23 ± 16.36	0.0139
CARS	321.47 ± 39.48	377.56 ± 49.63	0.000698	0.0175	cg08895021	3.69 ± 0.34	3.27 ± 0.44	0.0158
CARS	321.47 ± 39.48	377.56 ± 49.63	0.000698	0.0175	cg21190595	33.07 ± 4.57	35.76 ± 5.05	0.0226
CASP1	62.01 ± 22.18	50.11 ± 24.12	0.00153	0.0269	cg16402635	92.67 ± 0.69	93.39 ± 1.5	0.0433
CASP5	29.75 ± 13.33	21.36 ± 9.65	0.00156	0.0272	cg22634105	75.05 ± 3.91	78.57 ± 2.53	0.0074
CASP5	29.75 ± 13.33	21.36 ± 9.65	0.00156	0.0272	cg24432977	38.26 ± 13.3	43.3 ± 13.15	0.0454
CAST	616.46 ± 68.07	689.31 ± 91.26	0.00374	0.0438	cg03839934	5 ± 0.64	4.03 ± 0.54	0.00108
CAST	616.46 ± 68.07	689.31 ± 91.26	0.00374	0.0438	cg24982541	72.23 ± 3.3	75.9 ± 4.05	0.00158
CAST	616.46 ± 68.07	689.31 ± 91.26	0.00374	0.0438	cg24849812	4.01 ± 0.48	3.43 ± 0.65	0.00952
CAST	616.46 ± 68.07	689.31 ± 91.26	0.00374	0.0438	cg17330273	90.1 ± 2.96	92.16 ± 2.72	0.0135
CAST	616.46 ± 68.07	689.31 ± 91.26	0.00374	0.0438	cg12451676	4.49 ± 0.82	5.24 ± 0.8	0.0212
CAST	616.46 ± 68.07	689.31 ± 91.26	0.00374	0.0438	cg16136840	10.8 ± 1.83	9.55 ± 1.52	0.0496
CASZ1	76.75 ± 7.63	67.04 ± 7.81	0.00109	0.0222	cg18271964	47.6 ± 12.17	52.23 ± 12.24	0.000933
CASZ1	76.75 ± 7.63	67.04 ± 7.81	0.00109	0.0222	cg15597109	65.25 ± 6.08	69.13 ± 5.68	0.00114
CASZ1	76.75 ± 7.63	67.04 ± 7.81	0.00109	0.0222	cg10582871	90.56 ± 1.4	92.16 ± 0.97	0.00134
CASZ1	76.75 ± 7.63	67.04 ± 7.81	0.00109	0.0222	cg00925802	42.4 ± 14.5	49.37 ± 15.81	0.00144
CASZ1	76.75 ± 7.63	67.04 ± 7.81	0.00109	0.0222	cg01016030	79.06 ± 3.87	80.77 ± 4.15	0.00154
CASZ1	76.75 ± 7.63	67.04 ± 7.81	0.00109	0.0222	cg27170141	80.75 ± 6.05	84.35 ± 5.29	0.00206
CASZ1	76.75 ± 7.63	67.04 ± 7.81	0.00109	0.0222	cg20452711	69.74 ± 7.37	73.22 ± 7.79	0.00246
CASZ1	76.75 ± 7.63	67.04 ± 7.81	0.00109	0.0222	cg22608619	67.06 ± 4.78	70.45 ± 4.46	0.0028
CASZ1	76.75 ± 7.63	67.04 ± 7.81	0.00109	0.0222	cg19727827	73.62 ± 2.81	76.16 ± 2.54	0.00288
CASZ1	76.75 ± 7.63	67.04 ± 7.81	0.00109	0.0222	cg19253831	71.24 ± 10.58	75.29 ± 9.44	0.0034
CASZ1	76.75 ± 7.63	67.04 ± 7.81	0.00109	0.0222	cg01421021	90.58 ± 2.11	92.35 ± 1.31	0.00349
CASZ1	76.75 ± 7.63	67.04 ± 7.81	0.00109	0.0222	cg10816626	65.74 ± 9.79	70.08 ± 9.61	0.00384
CASZ1	76.75 ± 7.63	67.04 ± 7.81	0.00109	0.0222	cg22853713	54.44 ± 10.96	58.78 ± 11.45	0.00645
CASZ1	76.75 ± 7.63	67.04 ± 7.81	0.00109	0.0222	cg07159230	44.08 ± 16.17	51.2 ± 15.97	0.00688
CASZ1	76.75 ± 7.63	67.04 ± 7.81	0.00109	0.0222	cg24293689	50.23 ± 19.05	57.28 ± 19.42	0.00779
CASZ1	76.75 ± 7.63	67.04 ± 7.81	0.00109	0.0222	cg06377684	47.96 ± 9.99	52.18 ± 9.67	0.00906
CASZ1	76.75 ± 7.63	67.04 ± 7.81	0.00109	0.0222	cg04090867	73.49 ± 5.71	76.83 ± 5.34	0.00981
CASZ1	76.75 ± 7.63	67.04 ± 7.81	0.00109	0.0222	cg27563027	92.36 ± 4.51	89.85 ± 6.15	0.0114
CASZ1	76.75 ± 7.63	67.04 ± 7.81	0.00109	0.0222	cg15031409	56.7 ± 3.69	60.36 ± 4.29	0.0119
CASZ1	76.75 ± 7.63	67.04 ± 7.81	0.00109	0.0222	cg13428086	49.23 ± 6.91	52.17 ± 7.45	0.0123
CASZ1	76.75 ± 7.63	67.04 ± 7.81	0.00109	0.0222	cg13840252	54.01 ± 8.62	58.8 ± 6.69	0.0138
CASZ1	76.75 ± 7.63	67.04 ± 7.81	0.00109	0.0222	cg24929966	94.82 ± 1.39	96.15 ± 0.93	0.0144
CASZ1	76.75 ± 7.63	67.04 ± 7.81	0.00109	0.0222	cg15490335	61.05 ± 6.16	63.16 ± 7.31	0.0155
CASZ1	76.75 ± 7.63	67.04 ± 7.81	0.00109	0.0222	cg10053369	56.26 ± 16.65	62.55 ± 17.34	0.0194
CASZ1	76.75 ± 7.63	67.04 ± 7.81	0.00109	0.0222	cg19403943	81.81 ± 4.81	84.53 ± 3.06	0.0262
CASZ1	76.75 ± 7.63	67.04 ± 7.81	0.00109	0.0222	cg11913218	3.55 ± 0.58	3.11 ± 0.64	0.027
CASZ1	76.75 ± 7.63	67.04 ± 7.81	0.00109	0.0222	cg11222217	42.37 ± 10.97	45.75 ± 10.92	0.0271
CASZ1	76.75 ± 7.63	67.04 ± 7.81	0.00109	0.0222	cg11732134	64.22 ± 8.74	67.05 ± 8.1	0.0279
CASZ1	76.75 ± 7.63	67.04 ± 7.81	0.00109	0.0222	cg01968133	65.11 ± 5.93	69.86 ± 6.63	0.0285
CASZ1	76.75 ± 7.63	67.04 ± 7.81	0.00109	0.0222	cg19590227	23.88 ± 9.35	21.41 ± 8.55	0.0293
CASZ1	76.75 ± 7.63	67.04 ± 7.81	0.00109	0.0222	cg09179249	48.58 ± 10.19	51.24 ± 9.98	0.0295
CASZ1	76.75 ± 7.63	67.04 ± 7.81	0.00109	0.0222	cg14206273	50.92 ± 7.32	53.46 ± 7.17	0.0296
CASZ1	76.75 ± 7.63	67.04 ± 7.81	0.00109	0.0222	cg23957159	45.59 ± 10.9	50.68 ± 12.01	0.031
CASZ1	76.75 ± 7.63	67.04 ± 7.81	0.00109	0.0222	cg18437144	75.51 ± 2.15	76.84 ± 2.42	0.0495
CAV1	142.86 ± 65.84	109.46 ± 52.24	0.00365	0.043	cg13522244	10.8 ± 1.14	9.97 ± 1.31	0.0211
CAV1	142.86 ± 65.84	109.46 ± 52.24	0.00365	0.043	cg06225476	73.83 ± 2.85	76.99 ± 3.94	0.0241
CAV1	142.86 ± 65.84	109.46 ± 52.24	0.00365	0.043	cg24987440	94.82 ± 0.95	95.95 ± 1.28	0.0259
CAV1	142.86 ± 65.84	109.46 ± 52.24	0.00365	0.043	cg24060730	87.05 ± 4.8	89.37 ± 3.68	0.0274
CAV1	142.86 ± 65.84	109.46 ± 52.24	0.00365	0.043	cg24980893	6.17 ± 1.24	5.38 ± 0.94	0.0369
CAV1	142.86 ± 65.84	109.46 ± 52.24	0.00365	0.043	cg05232628	71.66 ± 7.44	74.6 ± 7.98	0.0407
CAV2	713.57 ± 235.74	599.06 ± 249.34	0.00139	0.0255	cg12739419	29.43 ± 6.8	27.11 ± 6.63	0.00824
CAV2	713.57 ± 235.74	599.06 ± 249.34	0.00139	0.0255	cg11825652	26.69 ± 6.17	25.11 ± 6.96	0.0281
CAV2	713.57 ± 235.74	599.06 ± 249.34	0.00139	0.0255	cg02799643	56.44 ± 10.99	52.81 ± 11.6	0.0385
CBR1	315.86 ± 62.85	280.23 ± 61.42	0.000681	0.0172	cg05297739	88.7 ± 2.9	87.42 ± 3.17	0.0357
CBX6	491.17 ± 84.31	440.17 ± 79.73	0.000863	0.0197	cg05738585	62.81 ± 7.59	65.83 ± 7.48	0.012
CBX6	491.17 ± 84.31	440.17 ± 79.73	0.000863	0.0197	cg07524398	47.48 ± 6.96	50.82 ± 7.51	0.0165
CBX6	491.17 ± 84.31	440.17 ± 79.73	0.000863	0.0197	cg13293943	95.34 ± 2.53	96.15 ± 1.53	0.0465
CBX6	491.17 ± 84.31	440.17 ± 79.73	0.000863	0.0197	cg06060673	4.65 ± 0.44	5.17 ± 0.7	0.0489
CCDC102B	79.82 ± 30.09	55.67 ± 27.92	4.32e-05	0.00488	cg03686067	94.01 ± 0.89	95.19 ± 0.59	0.00471
CCDC102B	79.82 ± 30.09	55.67 ± 27.92	4.32e-05	0.00488	cg06923616	44.57 ± 4.45	47.61 ± 4.32	0.00889
CCDC102B	79.82 ± 30.09	55.67 ± 27.92	4.32e-05	0.00488	cg15275100	4.31 ± 0.78	5.02 ± 0.56	0.0296
CCDC102B	79.82 ± 30.09	55.67 ± 27.92	4.32e-05	0.00488	cg14941466	4.45 ± 0.47	4.08 ± 0.44	0.0334
CCDC102B	79.82 ± 30.09	55.67 ± 27.92	4.32e-05	0.00488	cg18556345	3.51 ± 0.35	3.28 ± 0.29	0.0495
CCDC104	453.17 ± 69.46	525.82 ± 91.59	0.00378	0.044	cg00980331	2.77 ± 0.32	3.05 ± 0.34	0.0209
CCDC106	110.34 ± 12.11	118.22 ± 10.99	0.00323	0.0405	cg22312354	26.75 ± 5.66	32.04 ± 7.34	0.00543
CCDC106	110.34 ± 12.11	118.22 ± 10.99	0.00323	0.0405	cg22085718	85.28 ± 1.62	86.48 ± 1.03	0.0156
CCDC106	110.34 ± 12.11	118.22 ± 10.99	0.00323	0.0405	cg26775079	27.31 ± 7.6	31.32 ± 8.94	0.0206
CCDC106	110.34 ± 12.11	118.22 ± 10.99	0.00323	0.0405	cg25230111	4.44 ± 0.37	4.05 ± 0.33	0.0353
CCDC106	110.34 ± 12.11	118.22 ± 10.99	0.00323	0.0405	cg07805604	6.29 ± 1.12	7.14 ± 1.41	0.0389
CCDC3	40.85 ± 5.67	33.77 ± 6.63	0.00019	0.00925	cg17141577	89.82 ± 2.99	91.59 ± 2.35	0.00373
CCDC3	40.85 ± 5.67	33.77 ± 6.63	0.00019	0.00925	cg27001894	36.08 ± 5.32	40.54 ± 6.44	0.0055
CCDC3	40.85 ± 5.67	33.77 ± 6.63	0.00019	0.00925	cg12039624	89.65 ± 2.18	91.02 ± 2.26	0.00843
CCDC3	40.85 ± 5.67	33.77 ± 6.63	0.00019	0.00925	cg10286056	85.85 ± 2.2	87.65 ± 1.98	0.0117
CCDC72	607.78 ± 52.13	679.2 ± 65	0.000397	0.013	cg24981564	2.77 ± 0.39	2.35 ± 0.44	0.012
CCDC72	692.69 ± 45.59	752.1 ± 56.19	0.00067	0.0171	cg24981564	2.77 ± 0.39	2.35 ± 0.44	0.012
CCDC72	607.78 ± 52.13	679.2 ± 65	0.000397	0.013	cg25858682	3.07 ± 0.56	2.67 ± 0.38	0.0383
CCDC72	692.69 ± 45.59	752.1 ± 56.19	0.00067	0.0171	cg25858682	3.07 ± 0.56	2.67 ± 0.38	0.0383
CCDC80	93.15 ± 41.31	66.79 ± 25.8	0.0015	0.0266	cg08365738	34.02 ± 19.53	41.04 ± 20.39	0.0216
CCDC80	93.15 ± 41.31	66.79 ± 25.8	0.0015	0.0266	cg02954903	31.3 ± 6.39	28.16 ± 7.7	0.0451
CCDC87	34.84 ± 3.02	39.81 ± 5.31	0.000869	0.0198	cg11335436	5.85 ± 0.49	6.32 ± 0.64	0.0466
CCDC9	123.04 ± 12.4	135.9 ± 14.36	0.00344	0.0417	cg22621897	94.38 ± 1.3	95.43 ± 0.74	0.0269
CCDC9	123.04 ± 12.4	135.9 ± 14.36	0.00344	0.0417	cg26256837	54.97 ± 1.46	56.12 ± 1.5	0.0457
CCDC90A	182.14 ± 19.62	217.09 ± 25.75	0.000358	0.0125	cg05768403	14.61 ± 5.83	17.93 ± 6.26	0.00718
CCNA2	89.09 ± 21.84	63.5 ± 24.53	0.000247	0.0104	cg01854459	3.36 ± 0.36	3.71 ± 0.46	0.0299
CCNB1	163.59 ± 38.11	121.15 ± 42.25	0.0001	0.0068	cg24088685	5.03 ± 0.63	4.32 ± 0.72	0.00153
CCNB1	163.59 ± 38.11	121.15 ± 42.25	0.0001	0.0068	cg09999250	3.71 ± 0.53	3.09 ± 0.49	0.01
CCNC	1134.23 ± 110.59	1262.78 ± 89.19	0.000898	0.02	cg01960280	16.19 ± 4.94	19.03 ± 4.78	0.018
CCND1	50.48 ± 5.12	58.6 ± 3.92	0.00321	0.0403	cg25060573	4.81 ± 1.17	4.02 ± 0.91	0.00137
CCND1	50.48 ± 5.12	58.6 ± 3.92	0.00321	0.0403	cg16794682	75.56 ± 3.22	77.44 ± 3.05	0.00324
CCND1	50.48 ± 5.12	58.6 ± 3.92	0.00321	0.0403	cg04717045	89.28 ± 2.21	87.76 ± 1.75	0.00987
CCND1	50.48 ± 5.12	58.6 ± 3.92	0.00321	0.0403	cg27021553	65.22 ± 3.07	68.29 ± 4.58	0.0118
CCND1	50.48 ± 5.12	58.6 ± 3.92	0.00321	0.0403	cg20195046	94.2 ± 1	94.86 ± 0.79	0.0119
CCRN4L	200.6 ± 30.72	235.7 ± 36.26	0.000396	0.013	cg04702527	43.31 ± 4.94	47.55 ± 5.22	0.000206
CCRN4L	200.6 ± 30.72	235.7 ± 36.26	0.000396	0.013	cg02582973	6.54 ± 0.73	5.88 ± 0.61	0.00386
CD109	40.71 ± 14.15	51.68 ± 18.61	0.00177	0.029	cg04283637	16.9 ± 4.83	19.32 ± 5.04	0.00191
CD109	40.71 ± 14.15	51.68 ± 18.61	0.00177	0.029	cg25850808	89.8 ± 2.98	90.6 ± 3.04	0.0131
CD163	48.1 ± 14.94	36.88 ± 14.54	0.000801	0.0188	cg05939324	89.86 ± 1.57	91.69 ± 2.24	0.0012
CD248	134.21 ± 74.77	90.24 ± 53.16	4.06e-07	0.00152	cg11067179	61.35 ± 10.07	64.43 ± 11.26	0.003
CD248	134.21 ± 74.77	90.24 ± 53.16	4.06e-07	0.00152	cg19090861	47.05 ± 12.69	52.13 ± 13.41	0.017
CD248	134.21 ± 74.77	90.24 ± 53.16	4.06e-07	0.00152	cg16182743	36.34 ± 2.81	38.97 ± 3.1	0.0266
CD248	134.21 ± 74.77	90.24 ± 53.16	4.06e-07	0.00152	cg13383058	33.91 ± 6.35	30.29 ± 6.84	0.0308
CD274	55.68 ± 10.45	75.5 ± 23.52	0.00283	0.0373	cg19724470	12.07 ± 4.5	15.23 ± 3.38	0.000992
CD55	500.96 ± 34.02	581.57 ± 61.82	0.00114	0.0229	cg26826631	95.33 ± 1.07	96.55 ± 1.06	0.00149
CD55	500.96 ± 34.02	581.57 ± 61.82	0.00114	0.0229	cg15732149	96.22 ± 0.76	96.9 ± 0.56	0.0103
CD55	500.96 ± 34.02	581.57 ± 61.82	0.00114	0.0229	cg02152968	45.4 ± 7.81	50.08 ± 9.68	0.0243
CD59	4179.08 ± 675.48	3504.89 ± 610.05	8.37e-05	0.00619	cg13241807	4.28 ± 0.63	3.52 ± 0.5	8.33e-05
CD59	4179.08 ± 675.48	3504.89 ± 610.05	8.37e-05	0.00619	cg06801676	69.61 ± 15.25	65.98 ± 16.38	0.0131
CD59	4179.08 ± 675.48	3504.89 ± 610.05	8.37e-05	0.00619	cg23254918	4.05 ± 0.68	3.36 ± 0.67	0.0221
CD74	391.67 ± 124.74	311.44 ± 110.01	8.84e-05	0.00637	cg19928046	5.61 ± 2.17	6.33 ± 2.27	0.00338
CD74	391.67 ± 124.74	311.44 ± 110.01	8.84e-05	0.00637	cg01601628	15.43 ± 4.04	17.13 ± 3.76	0.013
CD74	391.67 ± 124.74	311.44 ± 110.01	8.84e-05	0.00637	cg22183016	81.85 ± 2.69	83.89 ± 1.99	0.0243
CD74	391.67 ± 124.74	311.44 ± 110.01	8.84e-05	0.00637	cg16591228	4.95 ± 1.21	5.74 ± 1.48	0.035
CD74	391.67 ± 124.74	311.44 ± 110.01	8.84e-05	0.00637	cg09467825	93.35 ± 1.39	94.28 ± 1.3	0.042
CD82	460.55 ± 50.77	394.89 ± 64.67	0.000138	0.00784	cg22854223	5 ± 1.13	4.22 ± 0.79	0.00695
CD82	460.55 ± 50.77	394.89 ± 64.67	0.000138	0.00784	cg22697239	87.03 ± 1.83	88.63 ± 1.39	0.0182
CD82	460.55 ± 50.77	394.89 ± 64.67	0.000138	0.00784	cg05175803	84.15 ± 3.52	86.5 ± 2.81	0.0254
CDC2	24.71 ± 7.62	16.86 ± 5.78	0.000367	0.0127	cg20353480	6.94 ± 0.9	7.88 ± 0.72	0.00151
CDC2	24.71 ± 7.62	16.86 ± 5.78	0.000367	0.0127	cg27457323	6.12 ± 0.76	5.4 ± 0.72	0.00589
CDC2	24.71 ± 7.62	16.86 ± 5.78	0.000367	0.0127	cg14922279	3.62 ± 0.79	4.33 ± 1.18	0.0144
CDC2	24.71 ± 7.62	16.86 ± 5.78	0.000367	0.0127	cg02401235	2.63 ± 0.58	3.07 ± 0.39	0.0218
CDC26	392.53 ± 45.09	447.14 ± 49.86	0.00149	0.0264	cg13821031	77.16 ± 3.32	80.83 ± 3.28	0.0127
CDC26	189.58 ± 23.27	228 ± 32.3	0.000254	0.0105	cg13821031	77.16 ± 3.32	80.83 ± 3.28	0.0127
CDC26	392.53 ± 45.09	447.14 ± 49.86	0.00149	0.0264	cg21174750	68.56 ± 2.9	70.66 ± 3.79	0.0465
CDC26	189.58 ± 23.27	228 ± 32.3	0.000254	0.0105	cg21174750	68.56 ± 2.9	70.66 ± 3.79	0.0465
CDH1	1866.72 ± 218.85	1669.39 ± 215.56	0.000344	0.0123	cg00935351	69.28 ± 3.26	72.3 ± 1.69	0.0179
CDH11	279.05 ± 131.68	207.47 ± 115.09	2.45e-05	0.00393	cg04536893	7.81 ± 0.74	8.52 ± 1.49	0.033
CDH11	279.05 ± 131.68	207.47 ± 115.09	2.45e-05	0.00393	cg10065825	5.52 ± 1.08	4.91 ± 1.18	0.0347
CDH11	279.05 ± 131.68	207.47 ± 115.09	2.45e-05	0.00393	cg11510825	10 ± 0.9	11.07 ± 1.97	0.045
CDH11	279.05 ± 131.68	207.47 ± 115.09	2.45e-05	0.00393	cg09108073	72.69 ± 3.62	74.07 ± 2.68	0.0456
CDH17	225.02 ± 162.33	99.99 ± 51.82	0.000545	0.0154	cg12038710	92.29 ± 3.75	89.77 ± 5.43	0.018
CDH20	25.58 ± 3.42	30.22 ± 3.9	0.00409	0.0461	cg13161901	61.01 ± 5.28	62.75 ± 5.62	0.0471
CDH3	123.56 ± 40.1	96.93 ± 32.01	0.00194	0.0306	cg11843735	89.6 ± 2.25	92.03 ± 2.77	0.000653
CDH3	123.56 ± 40.1	96.93 ± 32.01	0.00194	0.0306	cg04904099	26.82 ± 5.65	30.85 ± 6.76	0.00608
CDH3	123.56 ± 40.1	96.93 ± 32.01	0.00194	0.0306	cg10377726	8.45 ± 1.91	9.62 ± 2.07	0.0093
CDH3	123.56 ± 40.1	96.93 ± 32.01	0.00194	0.0306	cg27417609	17.54 ± 3.32	19.94 ± 5.24	0.00943
CDH3	123.56 ± 40.1	96.93 ± 32.01	0.00194	0.0306	cg05650674	53.17 ± 7.13	56.87 ± 8.17	0.0315
CDH6	271.14 ± 103.46	200.09 ± 89.77	0.000292	0.0113	cg14505704	3.48 ± 0.45	4.18 ± 0.77	0.0038
CDH6	271.14 ± 103.46	200.09 ± 89.77	0.000292	0.0113	cg03983647	3.41 ± 0.45	3.04 ± 0.57	0.00448
CDH6	271.14 ± 103.46	200.09 ± 89.77	0.000292	0.0113	cg02655972	11.91 ± 1.25	13.57 ± 2.11	0.0183
CDH6	271.14 ± 103.46	200.09 ± 89.77	0.000292	0.0113	cg05236960	96.4 ± 0.7	97.03 ± 0.81	0.029
CDH6	271.14 ± 103.46	200.09 ± 89.77	0.000292	0.0113	cg03718411	75.38 ± 6.52	78.38 ± 6.35	0.0322
CDK7	227.68 ± 20.52	266.98 ± 30.3	8.46e-06	0.00239	cg04446749	2.81 ± 0.47	2.49 ± 0.34	0.00212
CDK7	227.68 ± 20.52	266.98 ± 30.3	8.46e-06	0.00239	cg04446749	2.81 ± 0.47	2.49 ± 0.34	0.00212
CDK7	227.68 ± 20.52	266.98 ± 30.3	8.46e-06	0.00239	cg18275539	4.17 ± 0.66	4.81 ± 0.71	0.0227
CDK7	227.68 ± 20.52	266.98 ± 30.3	8.46e-06	0.00239	cg18275539	4.17 ± 0.66	4.81 ± 0.71	0.0227
CDK7	227.68 ± 20.52	266.98 ± 30.3	8.46e-06	0.00239	cg26324201	3.62 ± 0.45	4.32 ± 0.68	0.0235
CDK7	227.68 ± 20.52	266.98 ± 30.3	8.46e-06	0.00239	cg26324201	3.62 ± 0.45	4.32 ± 0.68	0.0235
CDKN1A	241.77 ± 56.22	314 ± 56.77	0.000126	0.00764	cg18014042	89.4 ± 2.43	91.2 ± 1.98	0.00254
CDKN1A	241.77 ± 56.22	314 ± 56.77	0.000126	0.00764	cg26500144	10.75 ± 1.27	9.11 ± 1.04	0.00521
CDKN1A	241.77 ± 56.22	314 ± 56.77	0.000126	0.00764	cg03714916	31.34 ± 8.1	29.16 ± 7.51	0.0306
CDKN1A	241.77 ± 56.22	314 ± 56.77	0.000126	0.00764	cg13662121	87.13 ± 2.94	85.88 ± 2.53	0.0431
CDKN2B	192.31 ± 36.68	168.48 ± 30.43	0.0045	0.0487	cg08390209	49.68 ± 5.93	53.62 ± 5.66	0.00912
CDKN2B	192.31 ± 36.68	168.48 ± 30.43	0.0045	0.0487	cg02400248	3.6 ± 0.67	3.11 ± 0.59	0.0102
CDKN2B	192.31 ± 36.68	168.48 ± 30.43	0.0045	0.0487	cg19481686	68.43 ± 4.64	71.05 ± 3.58	0.0136
CDR2	458.54 ± 53.7	521.7 ± 85.61	0.00287	0.0376	cg06297541	32.27 ± 5.08	36.36 ± 4.67	0.0114
CDR2	458.54 ± 53.7	521.7 ± 85.61	0.00287	0.0376	cg04736636	4.56 ± 0.54	4.01 ± 0.75	0.0133
CDR2	458.54 ± 53.7	521.7 ± 85.61	0.00287	0.0376	cg20526663	4.23 ± 0.54	3.76 ± 0.69	0.026
CDV3	963.19 ± 97.9	1087.78 ± 154.54	0.00264	0.036	cg15556905	1.34 ± 0.33	1.1 ± 0.31	0.0245
CEACAM5	494.32 ± 245.27	241.51 ± 116.7	1.7e-06	0.00162	cg23351290	56.04 ± 2.88	58.01 ± 2.35	0.00327
CEACAM5	494.32 ± 245.27	241.51 ± 116.7	1.7e-06	0.00162	cg02768390	58.31 ± 3.73	60.68 ± 3.76	0.0104
CEACAM5	494.32 ± 245.27	241.51 ± 116.7	1.7e-06	0.00162	cg18458353	33.82 ± 4.21	35.91 ± 4.95	0.0231
CEACAM5	494.32 ± 245.27	241.51 ± 116.7	1.7e-06	0.00162	cg26257634	70.52 ± 3.54	73.27 ± 3.84	0.0238
CEACAM5	494.32 ± 245.27	241.51 ± 116.7	1.7e-06	0.00162	cg22808163	55.58 ± 4.42	57.61 ± 3.82	0.0273
CENPF	27.06 ± 6.81	20.44 ± 4.78	0.000554	0.0155	cg10716356	79.52 ± 2.81	82.09 ± 2.12	0.00151
CENPF	27.06 ± 6.81	20.44 ± 4.78	0.000554	0.0155	cg03327327	87.11 ± 2.04	88.53 ± 1.33	0.0251
CENPF	27.06 ± 6.81	20.44 ± 4.78	0.000554	0.0155	cg22426789	95.06 ± 1.66	96.2 ± 1.16	0.0283
CENPF	27.06 ± 6.81	20.44 ± 4.78	0.000554	0.0155	cg23625236	7.93 ± 0.87	7.2 ± 1.08	0.0315
CENPF	27.06 ± 6.81	20.44 ± 4.78	0.000554	0.0155	cg09933323	42.25 ± 14.41	47.27 ± 15.95	0.0436
CENPI	27.99 ± 11.64	19.06 ± 8.12	0.0037	0.0435	cg21293846	72.98 ± 8.52	76.38 ± 10.39	0.016
CENPN	135.79 ± 22.43	114.26 ± 22.78	0.000347	0.0123	cg06231882	4.7 ± 0.55	4.4 ± 0.32	0.0482
CENPN	135.79 ± 22.43	114.26 ± 22.78	0.000347	0.0123	cg20567721	2.94 ± 0.62	2.63 ± 0.68	0.0483
CENPO	64.35 ± 7.5	52.88 ± 9.37	0.000471	0.0144	cg27449030	89.05 ± 2.94	91.11 ± 0.97	0.00449
CENPO	64.35 ± 7.5	52.88 ± 9.37	0.000471	0.0144	cg19988770	4.25 ± 0.43	3.74 ± 0.5	0.0197
CENPO	64.35 ± 7.5	52.88 ± 9.37	0.000471	0.0144	cg21494337	2.88 ± 0.83	3.52 ± 0.64	0.0437
CEP192	127.84 ± 12.47	112.65 ± 8.77	0.00429	0.0473	cg19877371	4.34 ± 0.75	5.2 ± 0.94	0.0106
CEP192	127.84 ± 12.47	112.65 ± 8.77	0.00429	0.0473	cg00686761	5.54 ± 0.59	4.96 ± 0.55	0.0137
CEP55	36.45 ± 11.27	26.62 ± 6.62	0.000972	0.0208	cg04026927	93.58 ± 2.23	95.22 ± 1.59	0.00476
CEP55	36.45 ± 11.27	26.62 ± 6.62	0.000972	0.0208	cg11808746	2.5 ± 0.45	2.03 ± 0.28	0.0128
CEP55	36.45 ± 11.27	26.62 ± 6.62	0.000972	0.0208	cg18644897	92.04 ± 2	93.91 ± 2.03	0.031
CEP68	88.66 ± 11.47	78.69 ± 9.77	0.00374	0.0438	cg20592124	84.52 ± 3.91	87.33 ± 2.95	0.0094
CES2	267.34 ± 98.2	217.62 ± 62.59	0.00104	0.0216	cg03163767	18.44 ± 4.25	16.98 ± 4.93	0.00645
CFB	2318.04 ± 1234.85	1923.43 ± 1218.28	0.00303	0.0389	cg01143314	87.72 ± 1.78	89.57 ± 1.22	0.00296
CFB	2332.47 ± 1246.59	1940.48 ± 1241.73	0.00361	0.0428	cg01143314	87.72 ± 1.78	89.57 ± 1.22	0.00296
CFB	3212.48 ± 1679.39	2678.71 ± 1661.9	0.0027	0.0363	cg01143314	87.72 ± 1.78	89.57 ± 1.22	0.00296
CFB	2318.04 ± 1234.85	1923.43 ± 1218.28	0.00303	0.0389	cg23346801	79.13 ± 3.36	81.4 ± 3.63	0.015
CFB	2332.47 ± 1246.59	1940.48 ± 1241.73	0.00361	0.0428	cg23346801	79.13 ± 3.36	81.4 ± 3.63	0.015
CFB	3212.48 ± 1679.39	2678.71 ± 1661.9	0.0027	0.0363	cg23346801	79.13 ± 3.36	81.4 ± 3.63	0.015
CFB	2318.04 ± 1234.85	1923.43 ± 1218.28	0.00303	0.0389	cg13823070	92.66 ± 1.92	93.4 ± 1.69	0.0369
CFB	2332.47 ± 1246.59	1940.48 ± 1241.73	0.00361	0.0428	cg13823070	92.66 ± 1.92	93.4 ± 1.69	0.0369
CFB	3212.48 ± 1679.39	2678.71 ± 1661.9	0.0027	0.0363	cg13823070	92.66 ± 1.92	93.4 ± 1.69	0.0369
CFI	396.5 ± 150.98	320.36 ± 128.46	0.00374	0.0438	cg06834035	81.41 ± 4.74	84 ± 5.38	0.00202
CFL2	399.38 ± 61.23	446.48 ± 51.97	0.00125	0.0239	cg25096582	25.1 ± 1.98	23.59 ± 2.09	0.0169
CFL2	399.38 ± 61.23	446.48 ± 51.97	0.00125	0.0239	cg15889061	94.13 ± 1.27	95.33 ± 0.76	0.0299
CFL2	399.38 ± 61.23	446.48 ± 51.97	0.00125	0.0239	cg13828873	11.81 ± 2.1	13.52 ± 2.73	0.0476
CFTR	1690.94 ± 654.9	1197 ± 670.5	0.000477	0.0145	cg17616554	6.33 ± 0.61	7.02 ± 0.9	0.0454
CGNL1	103.35 ± 38.93	88.32 ± 36.15	0.000511	0.0149	cg24384437	18.59 ± 5.66	22.82 ± 7.13	0.0149
CGNL1	103.35 ± 38.93	88.32 ± 36.15	0.000511	0.0149	cg23933339	87.34 ± 2.01	89.02 ± 3.07	0.024
CGNL1	103.35 ± 38.93	88.32 ± 36.15	0.000511	0.0149	cg04472039	92.83 ± 1.59	94.02 ± 1.64	0.0306
CGNL1	103.35 ± 38.93	88.32 ± 36.15	0.000511	0.0149	cg26222731	64.6 ± 6.13	67.2 ± 6.83	0.0339
CGNL1	103.35 ± 38.93	88.32 ± 36.15	0.000511	0.0149	cg21274857	8.43 ± 0.99	7.73 ± 1.24	0.0419
CHAF1B	123.67 ± 34.49	104.42 ± 25.7	9.65e-05	0.00661	cg25942896	93.4 ± 0.78	94.43 ± 0.96	0.00513
CHCHD2	1072.03 ± 142.54	1322.61 ± 141.64	1.88e-05	0.0034	cg21424664	4.19 ± 0.32	4.56 ± 0.64	0.0374
CHCHD7	88.73 ± 15.13	104.98 ± 20.89	7.32e-05	0.00581	cg14322403	12.46 ± 1.69	11.1 ± 1.33	0.0324
CHCHD7	88.73 ± 15.13	104.98 ± 20.89	7.32e-05	0.00581	cg15456925	8.4 ± 1.29	7.34 ± 1.27	0.0405
CHEK1	73.82 ± 20	57.39 ± 17.63	0.00132	0.0246	cg05569124	2.86 ± 0.37	3.31 ± 0.59	0.00347
CHGA	1623.59 ± 643.73	2133.4 ± 722.83	0.000138	0.00784	cg26947773	52.56 ± 11.48	57.3 ± 11.3	0.00398
CHGA	1623.59 ± 643.73	2133.4 ± 722.83	0.000138	0.00784	cg10166151	75.48 ± 8.73	78.14 ± 7.5	0.00716
CHGA	1623.59 ± 643.73	2133.4 ± 722.83	0.000138	0.00784	cg15400703	38.21 ± 8.27	42.09 ± 9.41	0.00791
CHGA	1623.59 ± 643.73	2133.4 ± 722.83	0.000138	0.00784	cg12422450	4.77 ± 1.39	5.55 ± 1.38	0.0213
CHGA	1623.59 ± 643.73	2133.4 ± 722.83	0.000138	0.00784	cg00813752	15.39 ± 9.39	17.9 ± 9.27	0.0297
CHGB	4516.73 ± 1443.41	5358.4 ± 1698.17	0.000968	0.0207	cg07642638	11.54 ± 3.29	12.93 ± 3.5	0.0207
CHGB	4516.73 ± 1443.41	5358.4 ± 1698.17	0.000968	0.0207	cg07140797	91.11 ± 3.01	92.59 ± 2.35	0.0313
CHPF	251.75 ± 51	317.34 ± 89.31	0.000268	0.0108	cg24330386	45.28 ± 3.7	47.53 ± 3.63	0.000121
CHPF	251.75 ± 51	317.34 ± 89.31	0.000268	0.0108	cg03176520	32.88 ± 2.68	35.51 ± 3.7	0.00383
CHPF	251.75 ± 51	317.34 ± 89.31	0.000268	0.0108	cg15253243	3.33 ± 0.54	2.93 ± 0.49	0.0197
CHPF	251.75 ± 51	317.34 ± 89.31	0.000268	0.0108	cg03161587	89.73 ± 3.16	90.88 ± 2.81	0.0335
CHPF	251.75 ± 51	317.34 ± 89.31	0.000268	0.0108	cg04729655	61.28 ± 6.03	63.8 ± 6.26	0.0373
CHPF	251.75 ± 51	317.34 ± 89.31	0.000268	0.0108	cg17891495	4.56 ± 1.08	4.09 ± 1.08	0.0455
CHRNA5	321.83 ± 282.85	659.51 ± 497.5	6.99e-05	0.00574	cg22563815	69.5 ± 5.15	71.84 ± 3.52	0.0133
CHRNA5	321.83 ± 282.85	659.51 ± 497.5	6.99e-05	0.00574	cg26678012	21.87 ± 5.37	19.93 ± 5.12	0.022
CHRNB2	119.59 ± 24.35	130.27 ± 23.74	0.00411	0.0462	cg11193281	37.32 ± 4.63	41.15 ± 4.04	0.00297
CHRNB2	119.59 ± 24.35	130.27 ± 23.74	0.00411	0.0462	cg12392557	30.64 ± 15.86	35.83 ± 17.01	0.00878
CHRNB2	119.59 ± 24.35	130.27 ± 23.74	0.00411	0.0462	cg25730356	6.37 ± 1.04	5.83 ± 1.22	0.00917
CHRNB2	119.59 ± 24.35	130.27 ± 23.74	0.00411	0.0462	cg21052164	15.28 ± 5.73	17.54 ± 6.54	0.014
CHRNB2	119.59 ± 24.35	130.27 ± 23.74	0.00411	0.0462	cg05746024	17.45 ± 8.27	20.34 ± 9.41	0.0269
CHRNB2	119.59 ± 24.35	130.27 ± 23.74	0.00411	0.0462	cg18288119	68.46 ± 3.48	69.66 ± 4.09	0.0452
CHST4	123.23 ± 54.06	82.07 ± 43.55	0.000262	0.0107	cg04568774	87.62 ± 3.92	86.17 ± 2.88	0.0194
CIT	33.91 ± 5.55	28.74 ± 3.17	0.00073	0.0179	cg18805612	65.61 ± 6.65	70.09 ± 6.07	0.00109
CIT	33.91 ± 5.55	28.74 ± 3.17	0.00073	0.0179	cg02764093	44.09 ± 4.45	46.54 ± 4.88	0.00138
CIT	33.91 ± 5.55	28.74 ± 3.17	0.00073	0.0179	cg19844829	94.01 ± 1.9	95.52 ± 0.63	0.00883
CIT	33.91 ± 5.55	28.74 ± 3.17	0.00073	0.0179	cg21879102	47.1 ± 4.97	50.18 ± 6.45	0.0106
CIT	33.91 ± 5.55	28.74 ± 3.17	0.00073	0.0179	cg18881778	24.34 ± 3.39	26.27 ± 3.57	0.0113
CIT	33.91 ± 5.55	28.74 ± 3.17	0.00073	0.0179	cg21913981	61.85 ± 8.37	65.67 ± 7.17	0.0121
CIT	33.91 ± 5.55	28.74 ± 3.17	0.00073	0.0179	cg12704462	80.08 ± 6.43	83.46 ± 4.37	0.0169
CIT	33.91 ± 5.55	28.74 ± 3.17	0.00073	0.0179	cg20840795	16.52 ± 3.23	20.51 ± 4.73	0.0201
CIT	33.91 ± 5.55	28.74 ± 3.17	0.00073	0.0179	cg03018679	45.6 ± 6.77	48.52 ± 7.09	0.022
CIT	33.91 ± 5.55	28.74 ± 3.17	0.00073	0.0179	cg26097051	24.07 ± 3.86	21.69 ± 3.74	0.0288
CIT	33.91 ± 5.55	28.74 ± 3.17	0.00073	0.0179	cg19988880	3.98 ± 0.68	3.52 ± 0.57	0.032
CIT	33.91 ± 5.55	28.74 ± 3.17	0.00073	0.0179	cg14132388	13.27 ± 2.8	14.85 ± 3.32	0.0382
CIT	33.91 ± 5.55	28.74 ± 3.17	0.00073	0.0179	cg17338594	91.32 ± 1.71	92.57 ± 1.31	0.0419
CIT	33.91 ± 5.55	28.74 ± 3.17	0.00073	0.0179	cg18929590	8.43 ± 1.09	7.51 ± 1.33	0.044
CIT	33.91 ± 5.55	28.74 ± 3.17	0.00073	0.0179	cg22526288	2.6 ± 0.45	2.32 ± 0.37	0.0471
CITED2	493 ± 101.3	842.27 ± 337.12	5.13e-05	0.00512	cg04186169	3.11 ± 0.59	4.01 ± 1.08	0.00593
CITED2	493 ± 101.3	842.27 ± 337.12	5.13e-05	0.00512	cg24219734	4.18 ± 0.56	3.57 ± 0.4	0.0098
CKAP2	149.54 ± 25.5	119.64 ± 19.67	0.00137	0.0253	cg10728060	3.65 ± 0.46	4.13 ± 0.63	0.0132
CLDN12	1673 ± 202.59	1841.79 ± 173.25	0.00331	0.041	cg05586376	3.11 ± 0.39	2.79 ± 0.36	0.00618
CLIC1	1030.17 ± 194.23	1181.41 ± 185.06	0.00429	0.0473	cg10914115	49.67 ± 2.78	53.16 ± 3.09	0.000336
CLIC1	1100.25 ± 210.07	1262.15 ± 191.93	0.00262	0.0358	cg10914115	49.67 ± 2.78	53.16 ± 3.09	0.000336
CLIC1	1030.17 ± 194.23	1181.41 ± 185.06	0.00429	0.0473	cg12457415	24.52 ± 12.31	26.58 ± 12.48	0.009
CLIC1	1100.25 ± 210.07	1262.15 ± 191.93	0.00262	0.0358	cg12457415	24.52 ± 12.31	26.58 ± 12.48	0.009
CLIC1	1030.17 ± 194.23	1181.41 ± 185.06	0.00429	0.0473	cg13026137	57.3 ± 3.07	60.4 ± 4.98	0.0137
CLIC1	1100.25 ± 210.07	1262.15 ± 191.93	0.00262	0.0358	cg13026137	57.3 ± 3.07	60.4 ± 4.98	0.0137
CLIC1	1030.17 ± 194.23	1181.41 ± 185.06	0.00429	0.0473	cg12216180	85.35 ± 1.55	86.96 ± 1.84	0.0273
CLIC1	1100.25 ± 210.07	1262.15 ± 191.93	0.00262	0.0358	cg12216180	85.35 ± 1.55	86.96 ± 1.84	0.0273
CLIC1	1030.17 ± 194.23	1181.41 ± 185.06	0.00429	0.0473	cg16730737	6.13 ± 4.22	6.96 ± 4.77	0.048
CLIC1	1100.25 ± 210.07	1262.15 ± 191.93	0.00262	0.0358	cg16730737	6.13 ± 4.22	6.96 ± 4.77	0.048
CLIC1	1030.17 ± 194.23	1181.41 ± 185.06	0.00429	0.0473	cg18909389	23.62 ± 6.38	26.01 ± 8.19	0.0488
CLIC1	1100.25 ± 210.07	1262.15 ± 191.93	0.00262	0.0358	cg18909389	23.62 ± 6.38	26.01 ± 8.19	0.0488
CLIC5	34.81 ± 10.1	25.09 ± 4.33	0.000764	0.0184	cg21685808	21.9 ± 4.67	23.47 ± 3.54	0.0249
CLIC5	34.81 ± 10.1	25.09 ± 4.33	0.000764	0.0184	cg01330316	66.11 ± 7.88	68.93 ± 7.22	0.025
CLIC5	34.81 ± 10.1	25.09 ± 4.33	0.000764	0.0184	cg18742464	92.61 ± 2.35	94.02 ± 1.7	0.0291
CLIC5	34.81 ± 10.1	25.09 ± 4.33	0.000764	0.0184	cg20638683	11.61 ± 3.02	12.68 ± 3.47	0.0453
CLMN	304.8 ± 101.34	250.28 ± 103.9	0.0012	0.0235	cg05239310	50.14 ± 6.17	53.55 ± 5.16	0.0103
CLMN	304.8 ± 101.34	250.28 ± 103.9	0.0012	0.0235	cg20050420	85.15 ± 3.84	88.74 ± 5.16	0.0184
CLMN	304.8 ± 101.34	250.28 ± 103.9	0.0012	0.0235	cg13717541	41.48 ± 11.71	44.95 ± 9.99	0.033
CLMN	304.8 ± 101.34	250.28 ± 103.9	0.0012	0.0235	cg24995083	66.33 ± 12.24	68.7 ± 12.61	0.0361
CMTM7	324.96 ± 87.57	278.63 ± 81.44	9.65e-05	0.00661	cg10163776	5.72 ± 2.43	6.39 ± 2.16	0.0308
CMTM7	324.96 ± 87.57	278.63 ± 81.44	9.65e-05	0.00661	cg12923215	7.92 ± 0.96	9.1 ± 1.18	0.0373
CNGA3	114.54 ± 44.79	206.06 ± 100.73	5.8e-06	0.00228	cg07834510	88.25 ± 1.1	86.91 ± 1.84	0.0154
CNN3	653.97 ± 200	562.26 ± 170.77	0.000134	0.00773	cg01045913	94.9 ± 0.65	95.58 ± 0.78	0.01
CNTN1	1250.87 ± 617.23	1341.72 ± 563.28	0.00306	0.0391	cg02622052	4.03 ± 0.63	3.57 ± 0.45	0.00105
CNTN1	1250.87 ± 617.23	1341.72 ± 563.28	0.00306	0.0391	cg18795786	35.35 ± 5.2	39.84 ± 7.76	0.0127
CNTN1	1250.87 ± 617.23	1341.72 ± 563.28	0.00306	0.0391	cg01443755	27.07 ± 7.53	30.1 ± 7.21	0.021
CNTN1	1250.87 ± 617.23	1341.72 ± 563.28	0.00306	0.0391	cg04776357	75.84 ± 7.48	78.01 ± 7.42	0.0383
CNTN1	1250.87 ± 617.23	1341.72 ± 563.28	0.00306	0.0391	cg14243778	14.08 ± 3.87	16.25 ± 4.69	0.0469
COG3	316.2 ± 44.27	372.04 ± 44.74	0.000166	0.00855	cg07530947	48.35 ± 3.75	50.28 ± 3.37	0.0254
COG3	316.2 ± 44.27	372.04 ± 44.74	0.000166	0.00855	cg00603717	11.14 ± 1.47	10.08 ± 0.9	0.0361
COG3	316.2 ± 44.27	372.04 ± 44.74	0.000166	0.00855	cg08589212	74.84 ± 4.71	77.43 ± 5.96	0.048
COG6	967.2 ± 246.19	1155.89 ± 334.16	0.00035	0.0123	cg07192243	92.69 ± 2.34	94.41 ± 2.05	0.0296
COL12A1	141.75 ± 67.01	100.7 ± 45.68	0.000466	0.0143	cg20476329	19.72 ± 4.71	23.57 ± 4.04	0.00176
COL12A1	141.75 ± 67.01	100.7 ± 45.68	0.000466	0.0143	cg13094146	59.53 ± 5.89	62.06 ± 6.15	0.019
COL12A1	141.75 ± 67.01	100.7 ± 45.68	0.000466	0.0143	cg11964364	90.85 ± 1.71	91.66 ± 1.57	0.0388
COL1A1	1836.7 ± 872.86	1275.09 ± 690.45	1.43e-06	0.00162	cg14700325	67.06 ± 4.57	69.47 ± 4.75	0.00785
COL1A1	1836.7 ± 872.86	1275.09 ± 690.45	1.43e-06	0.00162	cg22809726	32.58 ± 3.64	34.88 ± 3.36	0.0292
COL1A1	1836.7 ± 872.86	1275.09 ± 690.45	1.43e-06	0.00162	cg18618815	68.35 ± 4.16	70.32 ± 3.85	0.0368
COL1A1	1836.7 ± 872.86	1275.09 ± 690.45	1.43e-06	0.00162	cg14832352	80.76 ± 3.24	82.16 ± 3.33	0.0407
COL1A2	1979.95 ± 904.15	1565.57 ± 841.6	0.000218	0.00981	cg23271831	9.8 ± 1.68	11.83 ± 3.12	0.00557
COL3A1	1129.68 ± 578.68	912.84 ± 523.51	0.00335	0.0413	cg12923449	82.44 ± 5.04	85.27 ± 4.87	0.0322
COL4A1	467.73 ± 171.66	361.12 ± 128.9	4.12e-05	0.00481	cg20327444	3.64 ± 0.41	3.13 ± 0.7	0.0163
COL4A1	467.73 ± 171.66	361.12 ± 128.9	4.12e-05	0.00481	cg05656497	89.69 ± 4.17	91.67 ± 3.52	0.0247
COL4A2	315.34 ± 108.61	260.95 ± 77.23	4.05e-05	0.00481	cg05161682	60.99 ± 3.86	64.9 ± 3.72	0.000465
COL4A2	315.34 ± 108.61	260.95 ± 77.23	4.05e-05	0.00481	cg10566332	90.27 ± 1.65	92.35 ± 1.26	0.00323
COL4A2	315.34 ± 108.61	260.95 ± 77.23	4.05e-05	0.00481	cg24844377	88.08 ± 2.46	89.8 ± 1.71	0.00664
COL4A2	315.34 ± 108.61	260.95 ± 77.23	4.05e-05	0.00481	cg21158935	89.2 ± 2.38	90.58 ± 1.89	0.00738
COL4A2	315.34 ± 108.61	260.95 ± 77.23	4.05e-05	0.00481	cg23638556	79.61 ± 3.17	82.28 ± 2.99	0.00914
COL4A2	315.34 ± 108.61	260.95 ± 77.23	4.05e-05	0.00481	cg21005369	93.63 ± 1.83	94.76 ± 1.41	0.0112
COL4A2	315.34 ± 108.61	260.95 ± 77.23	4.05e-05	0.00481	cg20327444	3.64 ± 0.41	3.13 ± 0.7	0.0163
COL4A2	315.34 ± 108.61	260.95 ± 77.23	4.05e-05	0.00481	cg11747695	78.26 ± 2.08	80.52 ± 1.87	0.0193
COL4A2	315.34 ± 108.61	260.95 ± 77.23	4.05e-05	0.00481	cg26743132	37.36 ± 4.77	41.94 ± 5.36	0.0213
COL4A2	315.34 ± 108.61	260.95 ± 77.23	4.05e-05	0.00481	cg20450058	73.41 ± 10.46	76.37 ± 9.74	0.0257
COL4A2	315.34 ± 108.61	260.95 ± 77.23	4.05e-05	0.00481	cg03482866	40.17 ± 6.6	42.89 ± 5.97	0.0301
COL4A2	315.34 ± 108.61	260.95 ± 77.23	4.05e-05	0.00481	cg05698020	75.49 ± 12.65	77.78 ± 10.77	0.0344
COL4A2	315.34 ± 108.61	260.95 ± 77.23	4.05e-05	0.00481	cg25065689	95.99 ± 0.64	96.5 ± 0.68	0.0368
COL5A1	151.04 ± 41.36	128.54 ± 31.05	0.000144	0.00805	cg14207613	61.8 ± 5.32	64.87 ± 4.07	0.0094
COL5A1	151.04 ± 41.36	128.54 ± 31.05	0.000144	0.00805	cg14548802	33 ± 8.49	36.38 ± 9.16	0.0117
COL5A1	151.04 ± 41.36	128.54 ± 31.05	0.000144	0.00805	cg13605536	79.07 ± 2.97	81.24 ± 3.81	0.0157
COL5A1	151.04 ± 41.36	128.54 ± 31.05	0.000144	0.00805	cg13516654	60.83 ± 3.31	62.48 ± 2.6	0.0165
COL5A1	151.04 ± 41.36	128.54 ± 31.05	0.000144	0.00805	cg14091896	59.98 ± 8.45	63.53 ± 9.65	0.0256
COL5A1	151.04 ± 41.36	128.54 ± 31.05	0.000144	0.00805	cg13717540	95.99 ± 0.65	96.6 ± 0.62	0.0265
COL5A1	151.04 ± 41.36	128.54 ± 31.05	0.000144	0.00805	cg14274542	46.94 ± 4.72	49.82 ± 5.55	0.0278
COL5A1	151.04 ± 41.36	128.54 ± 31.05	0.000144	0.00805	cg14198873	76.78 ± 3.29	79.02 ± 3.29	0.0455
COL5A2	191.81 ± 82.74	149.23 ± 69.71	2.86e-05	0.00416	cg22774472	8.16 ± 2.51	10.83 ± 2.81	0.000925
COL5A2	191.81 ± 82.74	149.23 ± 69.71	2.86e-05	0.00416	cg26137350	96.18 ± 1.28	97.28 ± 0.83	0.000942
COL5A2	191.81 ± 82.74	149.23 ± 69.71	2.86e-05	0.00416	cg10765212	16.97 ± 6.1	20.7 ± 6.87	0.0173
COL5A2	191.81 ± 82.74	149.23 ± 69.71	2.86e-05	0.00416	cg09211763	14.2 ± 3.63	15.44 ± 3.7	0.0367
COL6A1	418.03 ± 140.85	346.39 ± 111.11	0.000414	0.0132	cg15313403	87.94 ± 1.62	89.84 ± 2.87	0.0113
COL6A1	418.03 ± 140.85	346.39 ± 111.11	0.000414	0.0132	cg15245520	96.43 ± 0.52	97.09 ± 0.58	0.0134
COL6A3	886.55 ± 435.26	620.85 ± 341.04	1.64e-05	0.00324	cg10859789	58.51 ± 4.84	62.1 ± 4.93	0.000131
COL6A3	886.55 ± 435.26	620.85 ± 341.04	1.64e-05	0.00324	cg00146565	76.39 ± 4.02	79.89 ± 3.27	0.000289
COL6A3	886.55 ± 435.26	620.85 ± 341.04	1.64e-05	0.00324	cg14288066	64.01 ± 3.81	67.01 ± 3.76	0.0124
COL6A3	886.55 ± 435.26	620.85 ± 341.04	1.64e-05	0.00324	cg04869122	65.62 ± 3.36	68.18 ± 4.45	0.0201
COL6A3	886.55 ± 435.26	620.85 ± 341.04	1.64e-05	0.00324	cg24830524	93.13 ± 1.06	93.85 ± 1.19	0.023
COL6A3	886.55 ± 435.26	620.85 ± 341.04	1.64e-05	0.00324	cg08957605	93.28 ± 1.15	94.05 ± 1.2	0.0244
COL6A3	886.55 ± 435.26	620.85 ± 341.04	1.64e-05	0.00324	cg13537346	93.57 ± 1.58	94.73 ± 1.39	0.0317
COL6A3	886.55 ± 435.26	620.85 ± 341.04	1.64e-05	0.00324	cg23417677	93.68 ± 1.05	94.36 ± 0.74	0.0464
COPA	1878.21 ± 266.1	2056.32 ± 327.87	0.000748	0.0182	cg09866659	49.57 ± 4.52	53.56 ± 3.25	0.0393
COPA	1878.21 ± 266.1	2056.32 ± 327.87	0.000748	0.0182	cg14524600	3.96 ± 0.68	3.41 ± 0.51	0.0412
COPB1	1801.71 ± 198.18	1983.59 ± 209.06	0.000248	0.0104	cg06646285	4.85 ± 0.82	6.13 ± 0.87	0.0011
COPB1	1801.71 ± 198.18	1983.59 ± 209.06	0.000248	0.0104	cg16535062	2.03 ± 0.36	2.42 ± 0.36	0.0269
COPE	438.86 ± 34.31	538.21 ± 70.85	0.000896	0.02	cg18655928	3.76 ± 0.26	3.45 ± 0.3	0.0115
COPG	699.6 ± 103.99	828.06 ± 132.65	0.000225	0.00999	cg09723533	5.64 ± 0.63	4.98 ± 0.79	0.0105
COPS4	363.33 ± 70.94	405.31 ± 61.87	0.00372	0.0437	cg24137332	24.42 ± 4.34	26.9 ± 3.19	0.0114
COPS4	363.33 ± 70.94	405.31 ± 61.87	0.00372	0.0437	cg00418511	3.05 ± 0.45	3.31 ± 0.43	0.0475
COPS4	363.33 ± 70.94	405.31 ± 61.87	0.00372	0.0437	cg18971647	7.57 ± 0.72	8.5 ± 1.3	0.0482
COPZ1	2129.17 ± 212.55	2351.82 ± 277.72	0.000464	0.0142	cg23162343	3.07 ± 0.43	2.56 ± 0.29	0.00616
COPZ1	2129.17 ± 212.55	2351.82 ± 277.72	0.000464	0.0142	cg13827287	88.94 ± 1.7	90.09 ± 2.55	0.00919
COPZ1	2129.17 ± 212.55	2351.82 ± 277.72	0.000464	0.0142	cg22974630	72.46 ± 7.74	79.08 ± 6.28	0.0121
COPZ1	2129.17 ± 212.55	2351.82 ± 277.72	0.000464	0.0142	cg17271146	84.93 ± 2.94	87 ± 1.62	0.0272
COPZ1	2129.17 ± 212.55	2351.82 ± 277.72	0.000464	0.0142	cg24888814	55.84 ± 9.23	59.97 ± 8.45	0.0388
COX17	968.32 ± 156.5	1100.6 ± 202.93	0.000934	0.0205	cg25748542	87.14 ± 1.78	88.31 ± 2.27	0.0182
COX17	1130.51 ± 179.04	1274.06 ± 239.7	0.00391	0.0448	cg25748542	87.14 ± 1.78	88.31 ± 2.27	0.0182
COX7A1	169.77 ± 29.45	193.8 ± 35.23	0.000394	0.0129	cg15176213	52.48 ± 5.24	55.66 ± 7.51	0.034
COX7A2	809.03 ± 83.74	923.48 ± 55.68	0.00362	0.0429	cg24667938	7.51 ± 1.26	6.4 ± 0.97	0.0341
CPE	5659.7 ± 1720.67	6456.82 ± 1623.57	0.00066	0.0169	cg01708636	43.09 ± 16.21	48.23 ± 15.56	0.00268
CPE	5659.7 ± 1720.67	6456.82 ± 1623.57	0.00066	0.0169	cg21516044	65.06 ± 11.47	69.96 ± 11.82	0.00654
CPE	5659.7 ± 1720.67	6456.82 ± 1623.57	0.00066	0.0169	cg09538819	94.34 ± 1.28	95.33 ± 1.07	0.0109
CPE	5659.7 ± 1720.67	6456.82 ± 1623.57	0.00066	0.0169	cg11043571	34.71 ± 15.58	39.18 ± 14.41	0.0158
CPE	5659.7 ± 1720.67	6456.82 ± 1623.57	0.00066	0.0169	cg26518884	65.8 ± 12.3	70.85 ± 12.82	0.0302
CPE	5659.7 ± 1720.67	6456.82 ± 1623.57	0.00066	0.0169	cg17785786	35.7 ± 10.68	33.31 ± 11.33	0.035
CPE	5659.7 ± 1720.67	6456.82 ± 1623.57	0.00066	0.0169	cg12389356	75.45 ± 12.26	72.31 ± 11.51	0.0418
CPM	339.44 ± 136.27	290.09 ± 134.07	0.00113	0.0227	cg27076669	25.96 ± 5.52	28.81 ± 4.76	0.00507
CPM	339.44 ± 136.27	290.09 ± 134.07	0.00113	0.0227	cg21211357	40.47 ± 3.03	42.26 ± 2.95	0.0411
CPM	339.44 ± 136.27	290.09 ± 134.07	0.00113	0.0227	cg12098645	13.64 ± 1.66	12.78 ± 1.6	0.0448
CPNE8	156.88 ± 26.67	191.49 ± 42.98	0.00361	0.0428	cg13509195	4.39 ± 0.64	3.91 ± 0.52	0.0296
CPNE8	156.88 ± 26.67	191.49 ± 42.98	0.00361	0.0428	cg19520337	91.1 ± 1.41	92.41 ± 1.12	0.0405
CPNE9	22.73 ± 2.01	24.8 ± 2.67	0.00443	0.0482	cg16191009	46.26 ± 2.41	48.87 ± 2.09	6.72e-05
CPNE9	22.73 ± 2.01	24.8 ± 2.67	0.00443	0.0482	cg02741521	6.69 ± 1.2	5.66 ± 1.31	0.0396
CPS1	50.24 ± 12.37	42.22 ± 10.55	0.000296	0.0114	cg07063745	6.34 ± 3.65	7.72 ± 3.71	0.0128
CPVL	50.28 ± 11.16	43.44 ± 8.96	0.000434	0.0137	cg20242781	59.1 ± 7.15	62.13 ± 8.13	0.00146
CPVL	50.28 ± 11.16	43.44 ± 8.96	0.000434	0.0137	cg00233633	69.54 ± 4.88	73.14 ± 4.64	0.0198
CREB3	271.23 ± 27.58	331.79 ± 48.34	0.000213	0.00976	cg14123850	20.57 ± 2.07	18.06 ± 3.74	0.0237
CRELD2	234.91 ± 51.89	286.59 ± 75.58	0.00126	0.024	cg25882056	79.57 ± 2.27	83.3 ± 2.39	0.000212
CRELD2	234.91 ± 51.89	286.59 ± 75.58	0.00126	0.024	cg26441486	57.67 ± 3.47	61.14 ± 4.56	0.0231
CRELD2	234.91 ± 51.89	286.59 ± 75.58	0.00126	0.024	cg22405555	4.28 ± 0.66	4.86 ± 0.55	0.0441
CREM	64.83 ± 9.89	87.66 ± 15.91	0.000191	0.00925	cg05602439	83.57 ± 5.66	86.93 ± 3.02	0.00256
CREM	64.83 ± 9.89	87.66 ± 15.91	0.000191	0.00925	cg09937316	6.96 ± 0.8	5.98 ± 1.05	0.00805
CREM	64.83 ± 9.89	87.66 ± 15.91	0.000191	0.00925	cg10031769	68.87 ± 7.92	73.33 ± 7.89	0.00887
CREM	64.83 ± 9.89	87.66 ± 15.91	0.000191	0.00925	cg23593958	5 ± 0.69	4.47 ± 0.38	0.0206
CREM	64.83 ± 9.89	87.66 ± 15.91	0.000191	0.00925	cg26273724	4.03 ± 0.7	4.98 ± 0.95	0.024
CREM	64.83 ± 9.89	87.66 ± 15.91	0.000191	0.00925	cg07891983	13.33 ± 2.77	15.33 ± 2.38	0.0273
CREM	64.83 ± 9.89	87.66 ± 15.91	0.000191	0.00925	cg26024341	3.13 ± 0.43	2.9 ± 0.36	0.0406
CREM	64.83 ± 9.89	87.66 ± 15.91	0.000191	0.00925	cg16003829	9.43 ± 1.27	8.39 ± 1.28	0.0457
CRIM1	552.09 ± 129.25	483.51 ± 107.29	0.000576	0.0158	cg08801446	89.46 ± 5.69	88.06 ± 6.26	0.0124
CRIM1	552.09 ± 129.25	483.51 ± 107.29	0.000576	0.0158	cg17516469	81.92 ± 6.3	80.05 ± 5.43	0.0317
CRIM1	552.09 ± 129.25	483.51 ± 107.29	0.000576	0.0158	cg23336143	38.84 ± 10.59	41.56 ± 9.52	0.04
CRISPLD2	104.47 ± 64.99	89.91 ± 76.39	0.00283	0.0374	cg22563043	5.43 ± 0.95	4.84 ± 0.81	0.01
CRISPLD2	104.47 ± 64.99	89.91 ± 76.39	0.00283	0.0374	cg00656931	65.59 ± 1.86	67.58 ± 1.38	0.0142
CRISPLD2	104.47 ± 64.99	89.91 ± 76.39	0.00283	0.0374	cg06108360	29.65 ± 6.82	34.41 ± 7.13	0.0263
CRISPLD2	104.47 ± 64.99	89.91 ± 76.39	0.00283	0.0374	cg01550144	95.8 ± 0.95	96.39 ± 0.83	0.0268
CRISPLD2	104.47 ± 64.99	89.91 ± 76.39	0.00283	0.0374	cg06250127	83.8 ± 2.72	86.36 ± 2.67	0.0339
CRK	800.11 ± 99.93	743.12 ± 91.92	0.00169	0.0286	cg03149719	4.14 ± 1.04	5.06 ± 1.16	0.0158
CRK	800.11 ± 99.93	743.12 ± 91.92	0.00169	0.0286	cg05348421	32.27 ± 2.66	30.77 ± 2.29	0.0376
CRYM	67.1 ± 7.8	78.77 ± 11.95	0.000745	0.0182	cg03038520	83.55 ± 3.36	86.79 ± 2.53	0.0109
CRYM	67.1 ± 7.8	78.77 ± 11.95	0.000745	0.0182	cg22152192	92.08 ± 1.14	93.15 ± 1.06	0.0124
CRYM	67.1 ± 7.8	78.77 ± 11.95	0.000745	0.0182	cg10757684	3.79 ± 0.31	3.39 ± 0.47	0.022
CRYM	67.1 ± 7.8	78.77 ± 11.95	0.000745	0.0182	cg00437985	6.63 ± 1.14	7.73 ± 1.22	0.0245
CRYM	67.1 ± 7.8	78.77 ± 11.95	0.000745	0.0182	cg03880724	3.59 ± 0.64	3.15 ± 0.35	0.0309
CSK	134.29 ± 16.65	123.15 ± 17.16	0.00227	0.033	cg27211576	60.25 ± 3.36	63.23 ± 3.64	0.00372
CSK	134.29 ± 16.65	123.15 ± 17.16	0.00227	0.033	cg20552236	73.16 ± 3.91	75.67 ± 4.56	0.0254
CSK	134.29 ± 16.65	123.15 ± 17.16	0.00227	0.033	cg03484612	97.83 ± 0.41	98.14 ± 0.33	0.0443
CSRNP1	132.94 ± 18.15	175.87 ± 18.45	1.75e-06	0.00162	cg03540589	41.3 ± 7.65	44.82 ± 7.09	0.00137
CSRNP1	132.94 ± 18.15	175.87 ± 18.45	1.75e-06	0.00162	cg15141371	7.68 ± 0.78	6.45 ± 0.8	0.00152
CSRNP1	132.94 ± 18.15	175.87 ± 18.45	1.75e-06	0.00162	cg17451457	96.9 ± 0.64	95.97 ± 0.56	0.00617
CSRNP1	132.94 ± 18.15	175.87 ± 18.45	1.75e-06	0.00162	cg24791666	31.86 ± 12.23	35.64 ± 13.18	0.0185
CSRNP1	132.94 ± 18.15	175.87 ± 18.45	1.75e-06	0.00162	cg14689515	47.29 ± 12.69	50.98 ± 13.69	0.0209
CSRP2BP	128.78 ± 16.62	116.47 ± 15.75	0.0014	0.0255	cg03251675	93.83 ± 1.45	95.38 ± 0.89	0.00527
CSRP2BP	128.78 ± 16.62	116.47 ± 15.75	0.0014	0.0255	cg21007262	96.6 ± 0.7	97.04 ± 0.52	0.0487
CTAGE5	159.32 ± 23.93	185.19 ± 32.46	0.00139	0.0255	cg26125503	79.97 ± 8.92	85.23 ± 7.41	0.0299
CTCF	589.46 ± 56.52	514.7 ± 46.43	0.00156	0.0272	cg06829695	85.54 ± 2.44	88.44 ± 2.26	0.015
CTCF	589.46 ± 56.52	514.7 ± 46.43	0.00156	0.0272	cg04545079	47.72 ± 15.68	53.38 ± 16.32	0.0423
CTDSP2	620.12 ± 128	546.34 ± 116.14	0.000831	0.0193	cg16915316	26.61 ± 5.26	29.06 ± 4.54	0.0107
CTDSP2	620.12 ± 128	546.34 ± 116.14	0.000831	0.0193	cg09263904	52.27 ± 6.04	54.92 ± 6.15	0.0128
CTDSP2	620.12 ± 128	546.34 ± 116.14	0.000831	0.0193	cg21149967	73.75 ± 3.38	75.6 ± 2.7	0.0319
CTDSP2	620.12 ± 128	546.34 ± 116.14	0.000831	0.0193	cg02566627	38.02 ± 6.25	40.97 ± 6.57	0.0331
CTDSP2	620.12 ± 128	546.34 ± 116.14	0.000831	0.0193	cg26639561	8.7 ± 0.93	8.04 ± 1.07	0.04
CTDSP2	620.12 ± 128	546.34 ± 116.14	0.000831	0.0193	cg01190168	76.1 ± 2.66	77.15 ± 2.5	0.0419
CTGF	570.19 ± 267.55	404.65 ± 176.63	0.000783	0.0187	cg01813033	13.59 ± 4.06	11.86 ± 4	0.0186
CTGF	570.19 ± 267.55	404.65 ± 176.63	0.000783	0.0187	cg00261832	86.16 ± 4.64	83.83 ± 3.92	0.0289
CTH	72.67 ± 23.82	91.38 ± 36.78	0.00256	0.0354	cg03755098	2.78 ± 0.67	3.27 ± 0.52	0.0493
CTNNA1	1655.19 ± 191.53	1548.07 ± 127.55	0.00191	0.0303	cg24854175	43.19 ± 7.56	47.4 ± 5.94	0.00171
CTNNA1	1655.19 ± 191.53	1548.07 ± 127.55	0.00191	0.0303	cg08771171	39.93 ± 15.87	47.75 ± 17.09	0.00187
CTNNA1	1655.19 ± 191.53	1548.07 ± 127.55	0.00191	0.0303	cg23184518	47.41 ± 14.78	53.78 ± 15.86	0.00211
CTNNA1	1655.19 ± 191.53	1548.07 ± 127.55	0.00191	0.0303	cg07894651	87.91 ± 3.69	91.67 ± 2.4	0.00392
CTNNA1	1655.19 ± 191.53	1548.07 ± 127.55	0.00191	0.0303	cg11503687	75.81 ± 8.22	79.06 ± 8.5	0.00393
CTNNA1	1655.19 ± 191.53	1548.07 ± 127.55	0.00191	0.0303	cg11677683	64.3 ± 14.6	70.27 ± 14.14	0.0046
CTNNA1	1655.19 ± 191.53	1548.07 ± 127.55	0.00191	0.0303	cg07699767	86.56 ± 3.04	88.71 ± 2.33	0.0234
CTNNA1	1655.19 ± 191.53	1548.07 ± 127.55	0.00191	0.0303	cg18000650	94.93 ± 1.13	93.86 ± 1.31	0.0241
CTNNA1	1655.19 ± 191.53	1548.07 ± 127.55	0.00191	0.0303	cg17315014	59.38 ± 9.82	63.84 ± 11.12	0.0245
CTNNA1	1655.19 ± 191.53	1548.07 ± 127.55	0.00191	0.0303	cg02276665	24.48 ± 2.54	26.65 ± 3.14	0.0468
CTNNA2	142.06 ± 79.35	189.56 ± 94.65	0.000272	0.0109	cg15963070	91.7 ± 1.41	94.14 ± 1.77	0.00414
CTNNA2	142.06 ± 79.35	189.56 ± 94.65	0.000272	0.0109	cg27629977	4.31 ± 0.56	3.83 ± 0.6	0.00534
CTNNA2	142.06 ± 79.35	189.56 ± 94.65	0.000272	0.0109	cg06868413	81.7 ± 2.74	83.25 ± 2.38	0.00756
CTNNA2	142.06 ± 79.35	189.56 ± 94.65	0.000272	0.0109	cg14348756	16.98 ± 1.44	15.28 ± 1.3	0.00771
CTNNA2	142.06 ± 79.35	189.56 ± 94.65	0.000272	0.0109	cg10576499	97.01 ± 0.35	97.49 ± 0.56	0.012
CTNNA2	142.06 ± 79.35	189.56 ± 94.65	0.000272	0.0109	cg08154280	5.65 ± 0.68	6.3 ± 0.71	0.0202
CTNNA2	142.06 ± 79.35	189.56 ± 94.65	0.000272	0.0109	cg18913890	50.47 ± 17.22	45.02 ± 17.71	0.0209
CTNNA2	142.06 ± 79.35	189.56 ± 94.65	0.000272	0.0109	cg21621248	3.43 ± 0.67	4.13 ± 0.96	0.0209
CTNNA2	142.06 ± 79.35	189.56 ± 94.65	0.000272	0.0109	cg24509810	12.32 ± 2.14	14.63 ± 3.94	0.0268
CTNNA2	142.06 ± 79.35	189.56 ± 94.65	0.000272	0.0109	cg20792735	3.42 ± 0.35	3.96 ± 0.72	0.0345
CTNNB1	2781.31 ± 298.08	2509.32 ± 322.19	0.00102	0.0214	cg03532626	92.02 ± 2.1	93.62 ± 1.33	0.0151
CTNNB1	2781.31 ± 298.08	2509.32 ± 322.19	0.00102	0.0214	cg09489743	90.83 ± 3.13	93.19 ± 2.39	0.0198
CTPS	198.29 ± 42.33	178.27 ± 41.85	0.00315	0.0398	cg01002622	53.72 ± 4.29	57.46 ± 4.99	3.68e-05
CTPS	198.29 ± 42.33	178.27 ± 41.85	0.00315	0.0398	cg02668729	3.86 ± 0.37	3.19 ± 0.43	0.0042
CTPS	198.29 ± 42.33	178.27 ± 41.85	0.00315	0.0398	cg24669728	4.26 ± 0.57	3.68 ± 0.44	0.0107
CTPS	198.29 ± 42.33	178.27 ± 41.85	0.00315	0.0398	cg10122267	59.54 ± 4.53	61.64 ± 4.42	0.013
CTPS	198.29 ± 42.33	178.27 ± 41.85	0.00315	0.0398	cg06083001	62.07 ± 15.07	68.04 ± 15.13	0.0404
CTSA	1797.61 ± 271.99	1458.21 ± 260.89	3.87e-06	0.00208	cg11992317	3.74 ± 0.56	3.17 ± 0.71	0.0048
CTSA	1797.61 ± 271.99	1458.21 ± 260.89	3.87e-06	0.00208	cg19067730	15.03 ± 3.84	16.2 ± 2.54	0.0274
CTSC	312.22 ± 80.98	237.81 ± 92.35	0.000373	0.0128	cg25902627	3.38 ± 0.99	2.78 ± 0.47	0.00901
CTSC	312.22 ± 80.98	237.81 ± 92.35	0.000373	0.0128	cg03596479	74.34 ± 3.14	77.81 ± 4.15	0.0135
CTSC	312.22 ± 80.98	237.81 ± 92.35	0.000373	0.0128	cg18332146	27.56 ± 1.97	25.56 ± 1.5	0.0153
CTSD	2536.88 ± 457.29	2048.81 ± 418.87	1.76e-06	0.00162	cg03058187	1.76 ± 0.28	1.46 ± 0.29	0.00281
CTSE	390.8 ± 166.11	286.71 ± 151.16	0.00462	0.0494	cg12447687	96.26 ± 0.76	96.97 ± 0.77	0.0105
CTSH	622.05 ± 225.44	458.3 ± 216.17	1.07e-05	0.00266	cg02145220	80.29 ± 5.35	83.49 ± 4.61	0.00503
CTSH	622.05 ± 225.44	458.3 ± 216.17	1.07e-05	0.00266	cg18738367	52.71 ± 3.96	54.95 ± 3.64	0.0201
CTSH	622.05 ± 225.44	458.3 ± 216.17	1.07e-05	0.00266	cg27559595	7.35 ± 1.15	6.54 ± 0.44	0.0491
CTSO	238.06 ± 35.13	192.72 ± 35.55	0.00057	0.0157	cg12277698	94.64 ± 1.59	96.25 ± 0.97	0.000171
CTSO	238.06 ± 35.13	192.72 ± 35.55	0.00057	0.0157	cg04016744	5.62 ± 0.72	4.97 ± 0.72	0.000705
CTSO	238.06 ± 35.13	192.72 ± 35.55	0.00057	0.0157	cg11566358	30.96 ± 7.22	32.98 ± 6.77	0.0327
CTTNBP2NL	279.04 ± 51.17	241.84 ± 48.15	0.000344	0.0123	cg22156852	95 ± 1.14	95.73 ± 1.1	0.0118
CTTNBP2NL	279.04 ± 51.17	241.84 ± 48.15	0.000344	0.0123	cg24148757	77.23 ± 5.4	78.85 ± 5.07	0.0461
CTTNBP2NL	279.04 ± 51.17	241.84 ± 48.15	0.000344	0.0123	cg14528147	93.12 ± 2.32	94.31 ± 1.11	0.0473
CUL7	152.69 ± 25.55	168.95 ± 27.61	0.00085	0.0195	cg16705185	21.13 ± 6.45	24.16 ± 7.7	0.00924
CUL7	152.69 ± 25.55	168.95 ± 27.61	0.00085	0.0195	cg18159180	53.06 ± 6.72	55.77 ± 7.82	0.0382
CUTA	790.85 ± 147.43	901.63 ± 187.06	0.00283	0.0373	cg05352838	68.28 ± 5.55	71.97 ± 5.25	3.5e-05
CUTA	790.85 ± 147.43	901.63 ± 187.06	0.00283	0.0373	cg09459982	49.97 ± 4.15	52.33 ± 3.55	0.000225
CUTA	790.85 ± 147.43	901.63 ± 187.06	0.00283	0.0373	cg02854226	4.02 ± 0.83	3.05 ± 0.48	0.00458
CUTA	790.85 ± 147.43	901.63 ± 187.06	0.00283	0.0373	cg01300096	44.89 ± 4.23	47.95 ± 4.9	0.0122
CUTA	790.85 ± 147.43	901.63 ± 187.06	0.00283	0.0373	cg22751435	2.74 ± 0.45	2.32 ± 0.53	0.0159
CUTA	790.85 ± 147.43	901.63 ± 187.06	0.00283	0.0373	cg22289662	19.56 ± 3.21	22.51 ± 3.42	0.0188
CUTA	790.85 ± 147.43	901.63 ± 187.06	0.00283	0.0373	cg09287933	87.98 ± 4.24	89.69 ± 2.64	0.0275
CUTA	790.85 ± 147.43	901.63 ± 187.06	0.00283	0.0373	cg20249230	7.58 ± 0.77	6.86 ± 1.28	0.0335
CUTA	790.85 ± 147.43	901.63 ± 187.06	0.00283	0.0373	cg23565821	15.01 ± 3.65	17.49 ± 3.35	0.0345
CWF19L2	148.14 ± 20.94	133.36 ± 15.38	0.00215	0.032	cg12578959	7.35 ± 1.23	9.52 ± 1.58	0.00299
CWF19L2	148.14 ± 20.94	133.36 ± 15.38	0.00215	0.032	cg23880829	8.19 ± 1.08	7.13 ± 1.5	0.0417
CXADR	693.37 ± 194.37	604.29 ± 221.08	0.00142	0.0258	cg03167275	5.39 ± 1.29	4.82 ± 1.38	0.0355
CXADR	693.37 ± 194.37	604.29 ± 221.08	0.00142	0.0258	cg00744433	83.87 ± 7.13	80.08 ± 10.12	0.0357
CXXC5	739.8 ± 60.31	634.37 ± 87.2	0.000127	0.00764	cg26142075	2.53 ± 0.34	2.99 ± 0.4	0.00319
CXXC5	739.8 ± 60.31	634.37 ± 87.2	0.000127	0.00764	cg11176694	32.22 ± 5.67	36.19 ± 6.21	0.0033
CXXC5	739.8 ± 60.31	634.37 ± 87.2	0.000127	0.00764	cg06905511	81.65 ± 1.99	84.65 ± 3.78	0.00908
CXXC5	739.8 ± 60.31	634.37 ± 87.2	0.000127	0.00764	cg13331011	63.65 ± 6.81	60.32 ± 6.06	0.0254
CXXC5	739.8 ± 60.31	634.37 ± 87.2	0.000127	0.00764	cg12333398	3.29 ± 0.52	2.87 ± 0.3	0.0319
CXXC5	739.8 ± 60.31	634.37 ± 87.2	0.000127	0.00764	cg21069500	60 ± 9.59	66.7 ± 11.43	0.0411
CXXC5	739.8 ± 60.31	634.37 ± 87.2	0.000127	0.00764	cg26619047	3.04 ± 0.35	2.8 ± 0.3	0.0464
CXXC5	739.8 ± 60.31	634.37 ± 87.2	0.000127	0.00764	cg03977237	95.42 ± 0.92	96.18 ± 0.96	0.0464
CYB5A	1677.16 ± 325.27	1427.4 ± 324.86	0.00272	0.0365	cg22456192	2.33 ± 0.51	2.77 ± 0.63	0.00753
CYFIP1	478.07 ± 60.73	435.39 ± 70.47	0.00247	0.0347	cg24358771	74.98 ± 3.64	78.17 ± 4.67	0.00102
CYFIP1	478.07 ± 60.73	435.39 ± 70.47	0.00247	0.0347	cg11517728	76.97 ± 4.11	79.16 ± 3.61	0.00115
CYFIP1	478.07 ± 60.73	435.39 ± 70.47	0.00247	0.0347	cg05502271	4.94 ± 0.95	4.36 ± 0.46	0.0016
CYFIP1	478.07 ± 60.73	435.39 ± 70.47	0.00247	0.0347	cg25996001	95.5 ± 1.56	97.31 ± 1.3	0.00367
CYFIP1	478.07 ± 60.73	435.39 ± 70.47	0.00247	0.0347	cg27046528	60.27 ± 3.01	62.85 ± 2.03	0.00804
CYFIP1	478.07 ± 60.73	435.39 ± 70.47	0.00247	0.0347	cg13051607	83.06 ± 2.28	85.24 ± 2.66	0.00804
CYFIP1	478.07 ± 60.73	435.39 ± 70.47	0.00247	0.0347	cg24689585	85.67 ± 1.47	87.41 ± 1.9	0.0081
CYFIP1	478.07 ± 60.73	435.39 ± 70.47	0.00247	0.0347	cg05454389	90.38 ± 1.95	91.93 ± 1.52	0.00831
CYFIP1	478.07 ± 60.73	435.39 ± 70.47	0.00247	0.0347	cg10706438	92.37 ± 1.39	93.69 ± 1.08	0.00864
CYFIP1	478.07 ± 60.73	435.39 ± 70.47	0.00247	0.0347	cg01451203	96.64 ± 0.62	97.31 ± 0.53	0.0128
CYFIP1	478.07 ± 60.73	435.39 ± 70.47	0.00247	0.0347	cg21211873	68.37 ± 3	70.99 ± 2.51	0.0147
CYFIP1	478.07 ± 60.73	435.39 ± 70.47	0.00247	0.0347	cg12285911	90.03 ± 1.73	91.3 ± 1.65	0.0162
CYFIP1	478.07 ± 60.73	435.39 ± 70.47	0.00247	0.0347	cg06099188	87.11 ± 2.45	88.98 ± 2.46	0.0221
CYFIP1	478.07 ± 60.73	435.39 ± 70.47	0.00247	0.0347	cg14984066	87.98 ± 2.02	89.37 ± 2.57	0.0303
CYFIP1	478.07 ± 60.73	435.39 ± 70.47	0.00247	0.0347	cg25409809	48.07 ± 6	51.41 ± 6.95	0.0326
CYFIP1	478.07 ± 60.73	435.39 ± 70.47	0.00247	0.0347	cg22143684	95.33 ± 0.91	96.08 ± 1.24	0.0339
CYFIP1	478.07 ± 60.73	435.39 ± 70.47	0.00247	0.0347	cg24118983	95.06 ± 1.31	95.95 ± 0.78	0.034
CYFIP1	478.07 ± 60.73	435.39 ± 70.47	0.00247	0.0347	cg08330183	3.2 ± 0.33	3.44 ± 0.15	0.0372
CYFIP1	478.07 ± 60.73	435.39 ± 70.47	0.00247	0.0347	cg25777971	96.79 ± 0.61	96.09 ± 0.72	0.0382
CYFIP1	478.07 ± 60.73	435.39 ± 70.47	0.00247	0.0347	cg25946491	96.21 ± 1	96.87 ± 1.06	0.0456
CYGB	155.87 ± 48.84	128.84 ± 35.38	5.04e-05	0.00511	cg15574312	7.38 ± 0.84	8.58 ± 1.07	0.00732
CYP1A1	289.28 ± 239.7	117.67 ± 99.63	5.41e-05	0.0052	cg05010179	2.6 ± 0.38	3.19 ± 0.67	0.00283
CYP1A1	289.28 ± 239.7	117.67 ± 99.63	5.41e-05	0.0052	cg23680900	8.69 ± 1.53	9.75 ± 1.15	0.0115
CYP1A1	289.28 ± 239.7	117.67 ± 99.63	5.41e-05	0.0052	cg00353139	3.69 ± 0.89	4.54 ± 0.77	0.0138
CYP1A1	289.28 ± 239.7	117.67 ± 99.63	5.41e-05	0.0052	cg27051335	2.8 ± 0.3	2.48 ± 0.48	0.0155
CYP1A1	289.28 ± 239.7	117.67 ± 99.63	5.41e-05	0.0052	cg09611756	12.15 ± 2.17	14.31 ± 2.55	0.0347
CYP1A1	289.28 ± 239.7	117.67 ± 99.63	5.41e-05	0.0052	cg00370022	74.6 ± 3.71	77.01 ± 4.27	0.039
CYP1A1	289.28 ± 239.7	117.67 ± 99.63	5.41e-05	0.0052	cg05549655	14.31 ± 2.36	13.37 ± 2.69	0.0399
CYP1A1	289.28 ± 239.7	117.67 ± 99.63	5.41e-05	0.0052	cg23160522	54.51 ± 3.32	55.76 ± 3.7	0.0445
CYP1B1	508.46 ± 279.72	364.72 ± 200.74	0.000186	0.00916	cg01936270	3.86 ± 0.71	3.39 ± 0.55	0.00533
CYP1B1	508.46 ± 279.72	364.72 ± 200.74	0.000186	0.00916	cg20254225	34.16 ± 4.22	37.54 ± 4.87	0.0114
CYP1B1	508.46 ± 279.72	364.72 ± 200.74	0.000186	0.00916	cg09799983	15.85 ± 5.42	18.99 ± 6.31	0.0115
CYP1B1	508.46 ± 279.72	364.72 ± 200.74	0.000186	0.00916	cg11751707	10.55 ± 1.89	11.99 ± 2.17	0.0219
CYP2C19	27.64 ± 9.54	20.73 ± 4.5	0.00162	0.0278	cg24857560	69.28 ± 7.08	75.57 ± 9.26	0.0122
CYP4F2	35.4 ± 13.64	24.38 ± 5.17	0.00079	0.0187	cg24838174	62.63 ± 2.8	64.94 ± 2.33	0.00899
DAB2IP	126.65 ± 27.42	110.46 ± 28.1	0.000125	0.00764	cg00836944	93.35 ± 0.82	94.23 ± 1.1	0.0171
DAB2IP	126.65 ± 27.42	110.46 ± 28.1	0.000125	0.00764	cg15686608	67.16 ± 4.88	69.75 ± 5.84	0.0336
DCBLD2	554.95 ± 156.88	457.48 ± 124.18	6.23e-05	0.00549	cg07435592	7.76 ± 1.15	6.71 ± 1.08	0.00209
DCBLD2	554.95 ± 156.88	457.48 ± 124.18	6.23e-05	0.00549	cg09444863	59.78 ± 4.38	64.22 ± 3.99	0.0078
DCBLD2	554.95 ± 156.88	457.48 ± 124.18	6.23e-05	0.00549	cg14707886	82.08 ± 2.14	84.43 ± 1.35	0.0125
DCBLD2	554.95 ± 156.88	457.48 ± 124.18	6.23e-05	0.00549	cg16331862	75.7 ± 12.92	79.64 ± 10.84	0.0271
DCN	320.85 ± 163.27	269.09 ± 208.35	0.00329	0.041	cg26985711	39.59 ± 4.41	42.28 ± 4	0.00412
DCUN1D5	396.85 ± 45.09	447.03 ± 44.66	0.000451	0.014	cg13911411	3.34 ± 0.53	2.95 ± 0.33	0.0376
DDAH1	710.08 ± 122.2	593.89 ± 93.19	9.67e-05	0.00661	cg18808054	72.67 ± 6	77.78 ± 4.44	0.00379
DDAH1	710.08 ± 122.2	593.89 ± 93.19	9.67e-05	0.00661	cg00308936	93.22 ± 2.38	92 ± 2.66	0.0116
DDAH1	710.08 ± 122.2	593.89 ± 93.19	9.67e-05	0.00661	cg25756066	5.02 ± 0.79	4.34 ± 1.29	0.0227
DDAH1	710.08 ± 122.2	593.89 ± 93.19	9.67e-05	0.00661	cg20169015	28.38 ± 7.1	26.49 ± 7.13	0.0391
DDAH1	710.08 ± 122.2	593.89 ± 93.19	9.67e-05	0.00661	cg15991082	59.58 ± 14.66	54.51 ± 16.51	0.0461
DDAH1	710.08 ± 122.2	593.89 ± 93.19	9.67e-05	0.00661	cg06983715	2.75 ± 0.43	2.5 ± 0.5	0.0471
DDIT3	256.32 ± 63.94	521.8 ± 210.42	0.000307	0.0115	cg08984436	4.95 ± 0.66	4 ± 0.87	0.00554
DDIT4	542.85 ± 269.9	742.39 ± 354.29	0.000952	0.0206	cg08388111	5.43 ± 0.81	4.58 ± 0.6	0.0107
DDIT4	542.85 ± 269.9	742.39 ± 354.29	0.000952	0.0206	cg25914663	4.25 ± 0.44	3.5 ± 0.9	0.0196
DDIT4	542.85 ± 269.9	742.39 ± 354.29	0.000952	0.0206	cg13467950	15.87 ± 1.6	14.88 ± 1.6	0.0232
DDIT4	542.85 ± 269.9	742.39 ± 354.29	0.000952	0.0206	cg27144485	6.92 ± 0.82	6.2 ± 1.27	0.0393
DDOST	1157.79 ± 50.24	1287.12 ± 100.92	0.00278	0.037	cg14519150	37.6 ± 9.72	44.5 ± 12.71	0.00566
DDOST	1157.79 ± 50.24	1287.12 ± 100.92	0.00278	0.037	cg12743621	51.68 ± 2.4	53.84 ± 2.72	0.0383
DDR1	733.82 ± 116.97	837.04 ± 184.14	0.000682	0.0172	cg09810078	93.11 ± 2.05	94.34 ± 1.14	0.000575
DDR1	827.57 ± 134.66	947.17 ± 208.6	0.00062	0.0164	cg09810078	93.11 ± 2.05	94.34 ± 1.14	0.000575
DDR1	742.67 ± 118.94	846.73 ± 187.26	0.000646	0.0168	cg09810078	93.11 ± 2.05	94.34 ± 1.14	0.000575
DDR1	733.82 ± 116.97	837.04 ± 184.14	0.000682	0.0172	cg06200824	77.31 ± 4.45	80.68 ± 5.15	0.00263
DDR1	827.57 ± 134.66	947.17 ± 208.6	0.00062	0.0164	cg06200824	77.31 ± 4.45	80.68 ± 5.15	0.00263
DDR1	742.67 ± 118.94	846.73 ± 187.26	0.000646	0.0168	cg06200824	77.31 ± 4.45	80.68 ± 5.15	0.00263
DDR1	733.82 ± 116.97	837.04 ± 184.14	0.000682	0.0172	cg12669395	66.55 ± 5.02	70.38 ± 5.58	0.0053
DDR1	827.57 ± 134.66	947.17 ± 208.6	0.00062	0.0164	cg12669395	66.55 ± 5.02	70.38 ± 5.58	0.0053
DDR1	742.67 ± 118.94	846.73 ± 187.26	0.000646	0.0168	cg12669395	66.55 ± 5.02	70.38 ± 5.58	0.0053
DDR1	733.82 ± 116.97	837.04 ± 184.14	0.000682	0.0172	cg13200628	5.17 ± 0.69	4.35 ± 0.53	0.00641
DDR1	827.57 ± 134.66	947.17 ± 208.6	0.00062	0.0164	cg13200628	5.17 ± 0.69	4.35 ± 0.53	0.00641
DDR1	742.67 ± 118.94	846.73 ± 187.26	0.000646	0.0168	cg13200628	5.17 ± 0.69	4.35 ± 0.53	0.00641
DDR1	733.82 ± 116.97	837.04 ± 184.14	0.000682	0.0172	cg01936707	86 ± 3.85	88.01 ± 3.57	0.00648
DDR1	827.57 ± 134.66	947.17 ± 208.6	0.00062	0.0164	cg01936707	86 ± 3.85	88.01 ± 3.57	0.00648
DDR1	742.67 ± 118.94	846.73 ± 187.26	0.000646	0.0168	cg01936707	86 ± 3.85	88.01 ± 3.57	0.00648
DDR1	733.82 ± 116.97	837.04 ± 184.14	0.000682	0.0172	cg07979747	93.53 ± 1.89	94.58 ± 1.37	0.0075
DDR1	827.57 ± 134.66	947.17 ± 208.6	0.00062	0.0164	cg07979747	93.53 ± 1.89	94.58 ± 1.37	0.0075
DDR1	742.67 ± 118.94	846.73 ± 187.26	0.000646	0.0168	cg07979747	93.53 ± 1.89	94.58 ± 1.37	0.0075
DDR1	733.82 ± 116.97	837.04 ± 184.14	0.000682	0.0172	cg16111190	71.16 ± 6.79	74.79 ± 6.4	0.00809
DDR1	827.57 ± 134.66	947.17 ± 208.6	0.00062	0.0164	cg16111190	71.16 ± 6.79	74.79 ± 6.4	0.00809
DDR1	742.67 ± 118.94	846.73 ± 187.26	0.000646	0.0168	cg16111190	71.16 ± 6.79	74.79 ± 6.4	0.00809
DDR1	733.82 ± 116.97	837.04 ± 184.14	0.000682	0.0172	cg24303888	10.52 ± 1.42	9.19 ± 1	0.0114
DDR1	827.57 ± 134.66	947.17 ± 208.6	0.00062	0.0164	cg24303888	10.52 ± 1.42	9.19 ± 1	0.0114
DDR1	742.67 ± 118.94	846.73 ± 187.26	0.000646	0.0168	cg24303888	10.52 ± 1.42	9.19 ± 1	0.0114
DDR1	733.82 ± 116.97	837.04 ± 184.14	0.000682	0.0172	cg07912416	91.5 ± 2.96	92.83 ± 2.79	0.0166
DDR1	827.57 ± 134.66	947.17 ± 208.6	0.00062	0.0164	cg07912416	91.5 ± 2.96	92.83 ± 2.79	0.0166
DDR1	742.67 ± 118.94	846.73 ± 187.26	0.000646	0.0168	cg07912416	91.5 ± 2.96	92.83 ± 2.79	0.0166
DDR1	733.82 ± 116.97	837.04 ± 184.14	0.000682	0.0172	cg17604312	33.29 ± 2.23	31.16 ± 2.93	0.0234
DDR1	827.57 ± 134.66	947.17 ± 208.6	0.00062	0.0164	cg17604312	33.29 ± 2.23	31.16 ± 2.93	0.0234
DDR1	742.67 ± 118.94	846.73 ± 187.26	0.000646	0.0168	cg17604312	33.29 ± 2.23	31.16 ± 2.93	0.0234
DDR1	733.82 ± 116.97	837.04 ± 184.14	0.000682	0.0172	cg24646556	2.97 ± 0.48	2.64 ± 0.4	0.025
DDR1	827.57 ± 134.66	947.17 ± 208.6	0.00062	0.0164	cg24646556	2.97 ± 0.48	2.64 ± 0.4	0.025
DDR1	742.67 ± 118.94	846.73 ± 187.26	0.000646	0.0168	cg24646556	2.97 ± 0.48	2.64 ± 0.4	0.025
DDR1	733.82 ± 116.97	837.04 ± 184.14	0.000682	0.0172	cg11530564	43.77 ± 3.38	45.88 ± 3.8	0.0277
DDR1	827.57 ± 134.66	947.17 ± 208.6	0.00062	0.0164	cg11530564	43.77 ± 3.38	45.88 ± 3.8	0.0277
DDR1	742.67 ± 118.94	846.73 ± 187.26	0.000646	0.0168	cg11530564	43.77 ± 3.38	45.88 ± 3.8	0.0277
DDR1	733.82 ± 116.97	837.04 ± 184.14	0.000682	0.0172	cg27593250	84.05 ± 4.89	85.76 ± 3.32	0.0482
DDR1	827.57 ± 134.66	947.17 ± 208.6	0.00062	0.0164	cg27593250	84.05 ± 4.89	85.76 ± 3.32	0.0482
DDR1	742.67 ± 118.94	846.73 ± 187.26	0.000646	0.0168	cg27593250	84.05 ± 4.89	85.76 ± 3.32	0.0482
DERL2	709.99 ± 37.4	860.7 ± 84.97	3.43e-05	0.0046	cg12086046	5.55 ± 0.68	6.19 ± 0.58	0.000106
DERL2	709.99 ± 37.4	860.7 ± 84.97	3.43e-05	0.0046	cg02222103	4.38 ± 0.88	5.3 ± 1.32	0.0292
DGKB	82.95 ± 62.33	99.06 ± 69.32	0.000765	0.0184	cg01019188	66.66 ± 4.51	70.73 ± 3.25	0.00132
DHCR24	872.95 ± 253.87	697.23 ± 259.44	0.000216	0.0098	cg20291423	66.38 ± 15.35	61.23 ± 16.53	0.023
DHCR24	872.95 ± 253.87	697.23 ± 259.44	0.000216	0.0098	cg10177197	91.99 ± 1.39	92.95 ± 1.21	0.0242
DHCR24	872.95 ± 253.87	697.23 ± 259.44	0.000216	0.0098	cg10073091	21.46 ± 6.02	20.18 ± 5.59	0.0297
DHDDS	501.56 ± 79.58	596.97 ± 114.62	0.000303	0.0115	cg17218045	5.65 ± 0.57	4.86 ± 0.82	0.0174
DHFR	187.23 ± 32.16	157.65 ± 35.42	0.00191	0.0303	cg24059623	51.25 ± 3.66	53.91 ± 5.37	0.0164
DHRS3	530.78 ± 242.23	388.13 ± 200.42	5.45e-05	0.00521	cg17935811	36.29 ± 11.02	32.96 ± 12.03	0.0109
DHRS3	530.78 ± 242.23	388.13 ± 200.42	5.45e-05	0.00521	cg09229231	4.18 ± 0.56	4.63 ± 0.67	0.0196
DHRS3	530.78 ± 242.23	388.13 ± 200.42	5.45e-05	0.00521	cg01346152	29.53 ± 9.89	27.06 ± 9.65	0.0255
DHRS7	735.39 ± 108.04	785.84 ± 112.8	0.000326	0.012	cg13624631	14.53 ± 12.07	18.83 ± 14.82	0.000506
DIRC2	426.06 ± 76.24	379.62 ± 74.66	0.00165	0.0281	cg11735305	3.76 ± 0.57	3.16 ± 0.83	0.0131
DKK3	308.3 ± 97.71	248.49 ± 81.03	1.74e-05	0.00327	cg25759507	95.54 ± 0.85	94.77 ± 1.25	0.000686
DKK3	308.3 ± 97.71	248.49 ± 81.03	1.74e-05	0.00327	cg18768414	5.49 ± 2.91	6.68 ± 2.51	0.0063
DKK3	308.3 ± 97.71	248.49 ± 81.03	1.74e-05	0.00327	cg26235273	39.64 ± 7.76	43.82 ± 8.73	0.0251
DKK3	308.3 ± 97.71	248.49 ± 81.03	1.74e-05	0.00327	cg01286655	16.83 ± 4.54	17.96 ± 4.24	0.046
DKK4	31.46 ± 8.85	39.32 ± 11.49	3.97e-05	0.00481	cg06899970	16.89 ± 3.74	21.68 ± 5.01	0.0026
DKK4	31.46 ± 8.85	39.32 ± 11.49	3.97e-05	0.00481	cg02571142	43.37 ± 6.88	48.65 ± 7.26	0.015
DKK4	31.46 ± 8.85	39.32 ± 11.49	3.97e-05	0.00481	cg21209091	14.1 ± 2.94	15.94 ± 2.7	0.0256
DKK4	31.46 ± 8.85	39.32 ± 11.49	3.97e-05	0.00481	cg01762581	45.16 ± 5.96	49 ± 7.41	0.0321
DLGAP5	40.46 ± 17.36	28.57 ± 13.13	0.000555	0.0155	cg23678254	60.58 ± 14.11	67.37 ± 13.45	0.027
DNAJA4	318.34 ± 94.77	424.86 ± 133.11	0.00208	0.0316	cg05392364	7.05 ± 2.7	9.06 ± 5.07	0.031
DNAJA4	318.34 ± 94.77	424.86 ± 133.11	0.00208	0.0316	cg27093605	68.02 ± 12.5	72.98 ± 11.15	0.0403
DNAJB11	934.13 ± 75.69	1116.03 ± 157.35	0.000391	0.0129	cg26402401	2.73 ± 0.32	2.41 ± 0.25	0.00446
DNAJB9	384.39 ± 111.04	585.67 ± 124.33	3.69e-05	0.00481	cg19266034	8.21 ± 0.81	7.45 ± 0.76	0.0282
DNAJB9	384.39 ± 111.04	585.67 ± 124.33	3.69e-05	0.00481	cg24845324	3.94 ± 0.71	3.35 ± 0.7	0.0354
DNAJC1	459.08 ± 28.99	494.44 ± 35.76	0.000519	0.0151	cg03076324	2.76 ± 0.33	2.49 ± 0.34	0.00776
DNAJC1	459.08 ± 28.99	494.44 ± 35.76	0.000519	0.0151	cg03211481	93.2 ± 1.53	94.64 ± 0.83	0.0133
DNAJC1	459.08 ± 28.99	494.44 ± 35.76	0.000519	0.0151	cg23908998	8.38 ± 1.54	7.56 ± 0.87	0.049
DNAJC10	1262.89 ± 179.75	1422.6 ± 238.3	0.00371	0.0436	cg01101876	5.67 ± 1.09	4.64 ± 0.68	0.009
DNAJC12	1499.07 ± 417.51	2181.98 ± 644.05	1.26e-06	0.00162	cg12315959	95 ± 1.66	96.04 ± 0.74	0.0248
DNAJC2	103.89 ± 14.1	116.28 ± 12.04	0.00233	0.0335	cg17624052	2.82 ± 0.3	3 ± 0.26	0.0193
DNAJC2	103.89 ± 14.1	116.28 ± 12.04	0.00233	0.0335	cg19797049	52.56 ± 7.18	55.64 ± 6.32	0.021
DNAJC2	103.89 ± 14.1	116.28 ± 12.04	0.00233	0.0335	cg07082358	71.45 ± 4.48	73.5 ± 5.67	0.044
DNAJC3	1097.1 ± 172.08	1259.65 ± 205.34	0.00318	0.0401	cg25444236	12.92 ± 1.56	11.92 ± 1.34	0.0161
DNM2	355.95 ± 44.15	318.64 ± 30.59	0.00204	0.0313	cg13965612	77.37 ± 5.01	79.61 ± 5.82	0.00174
DNM2	355.95 ± 44.15	318.64 ± 30.59	0.00204	0.0313	cg04349565	3.72 ± 0.32	3.38 ± 0.34	0.0132
DNM2	355.95 ± 44.15	318.64 ± 30.59	0.00204	0.0313	cg13366849	89.74 ± 2.71	87.99 ± 2.82	0.015
DNM2	355.95 ± 44.15	318.64 ± 30.59	0.00204	0.0313	cg11572381	59.13 ± 4.32	62.04 ± 5.55	0.0337
DNM2	355.95 ± 44.15	318.64 ± 30.59	0.00204	0.0313	cg17332150	97.39 ± 0.58	97.85 ± 0.7	0.0418
DNMT1	182.42 ± 17.92	163.01 ± 18.27	0.000717	0.0178	cg07627628	96.01 ± 0.74	96.79 ± 0.82	0.00678
DNMT1	182.42 ± 17.92	163.01 ± 18.27	0.000717	0.0178	cg10635912	6.19 ± 0.78	5.57 ± 0.85	0.0127
DNMT1	182.42 ± 17.92	163.01 ± 18.27	0.000717	0.0178	cg16732626	61.61 ± 3.72	64.27 ± 2.71	0.0331
DOCK1	282.23 ± 26.53	248.48 ± 33.43	0.00134	0.025	cg18685034	47.86 ± 2.3	51.76 ± 3.15	0.00232
DOCK1	282.23 ± 26.53	248.48 ± 33.43	0.00134	0.025	cg19752018	85.82 ± 4.6	88.82 ± 3.43	0.00347
DOCK1	282.23 ± 26.53	248.48 ± 33.43	0.00134	0.025	cg04124361	91.11 ± 2.39	92.96 ± 1.79	0.00425
DOCK1	282.23 ± 26.53	248.48 ± 33.43	0.00134	0.025	cg04558647	91.05 ± 2.12	93 ± 1.25	0.0058
DOCK1	282.23 ± 26.53	248.48 ± 33.43	0.00134	0.025	cg03932201	69.29 ± 6.18	72.21 ± 7.05	0.00778
DOCK1	282.23 ± 26.53	248.48 ± 33.43	0.00134	0.025	cg06692260	94.98 ± 0.69	95.9 ± 0.76	0.00843
DOCK1	282.23 ± 26.53	248.48 ± 33.43	0.00134	0.025	cg15676916	90.47 ± 3.07	92.24 ± 2.24	0.00943
DOCK1	282.23 ± 26.53	248.48 ± 33.43	0.00134	0.025	cg03397442	94.35 ± 0.98	95.32 ± 1.11	0.0124
DOCK1	282.23 ± 26.53	248.48 ± 33.43	0.00134	0.025	cg26717418	82.96 ± 5.78	85.33 ± 3.55	0.0135
DOCK1	282.23 ± 26.53	248.48 ± 33.43	0.00134	0.025	cg05608777	4.34 ± 1.05	3.55 ± 0.36	0.0143
DOCK1	282.23 ± 26.53	248.48 ± 33.43	0.00134	0.025	cg24053748	13.25 ± 4.09	14.2 ± 3.5	0.0221
DOCK1	282.23 ± 26.53	248.48 ± 33.43	0.00134	0.025	cg11839566	90.68 ± 2.21	91.93 ± 2.18	0.0236
DOCK1	282.23 ± 26.53	248.48 ± 33.43	0.00134	0.025	cg25984344	4.23 ± 0.99	4.83 ± 1.62	0.0282
DOCK1	282.23 ± 26.53	248.48 ± 33.43	0.00134	0.025	cg24109477	86.73 ± 1.93	88.01 ± 1.33	0.0306
DOCK1	282.23 ± 26.53	248.48 ± 33.43	0.00134	0.025	cg23665778	7.88 ± 1.46	6.77 ± 0.78	0.0308
DOCK1	282.23 ± 26.53	248.48 ± 33.43	0.00134	0.025	cg19784622	94.02 ± 1.24	95.07 ± 0.98	0.0309
DOCK1	282.23 ± 26.53	248.48 ± 33.43	0.00134	0.025	cg18932726	5.14 ± 2.49	3.67 ± 0.5	0.0379
DOCK1	282.23 ± 26.53	248.48 ± 33.43	0.00134	0.025	cg06525651	3.42 ± 0.96	4.17 ± 0.9	0.0397
DOCK1	282.23 ± 26.53	248.48 ± 33.43	0.00134	0.025	cg00623593	94.41 ± 1.46	95.34 ± 1.76	0.0417
DOCK1	282.23 ± 26.53	248.48 ± 33.43	0.00134	0.025	cg03752935	71.48 ± 3.98	73.31 ± 4.09	0.0428
DOCK5	84.08 ± 29.46	72.29 ± 24.09	0.00249	0.0348	cg09852619	55 ± 14.93	60.33 ± 15.93	0.00568
DOCK5	84.08 ± 29.46	72.29 ± 24.09	0.00249	0.0348	cg25162451	76.2 ± 4.38	80.4 ± 4.18	0.00913
DOCK5	84.08 ± 29.46	72.29 ± 24.09	0.00249	0.0348	cg27185978	62.17 ± 8.47	59.81 ± 8.19	0.0176
DOCK5	84.08 ± 29.46	72.29 ± 24.09	0.00249	0.0348	cg01818776	88.2 ± 3.04	90.87 ± 2.17	0.0255
DOCK5	84.08 ± 29.46	72.29 ± 24.09	0.00249	0.0348	cg20036377	93.16 ± 1.71	94.18 ± 1.26	0.0348
DOCK5	84.08 ± 29.46	72.29 ± 24.09	0.00249	0.0348	cg23677311	80.42 ± 3.61	77.21 ± 5.99	0.0403
DOCK5	84.08 ± 29.46	72.29 ± 24.09	0.00249	0.0348	cg25192419	3.42 ± 0.4	4.05 ± 0.68	0.0486
DOM3Z	89.92 ± 15.42	107.01 ± 24.61	0.00245	0.0344	cg10201402	61.76 ± 3.61	64.76 ± 2.89	0.000564
DOM3Z	89.92 ± 15.42	107.01 ± 24.61	0.00245	0.0344	cg10201402	61.76 ± 3.61	64.76 ± 2.89	0.000564
DOM3Z	125.32 ± 33.38	154.96 ± 50.81	0.00285	0.0374	cg10201402	61.76 ± 3.61	64.76 ± 2.89	0.000564
DOM3Z	89.92 ± 15.42	107.01 ± 24.61	0.00245	0.0344	cg12456973	54.1 ± 4.95	58.36 ± 5.51	0.00197
DOM3Z	89.92 ± 15.42	107.01 ± 24.61	0.00245	0.0344	cg12456973	54.1 ± 4.95	58.36 ± 5.51	0.00197
DOM3Z	125.32 ± 33.38	154.96 ± 50.81	0.00285	0.0374	cg12456973	54.1 ± 4.95	58.36 ± 5.51	0.00197
DOM3Z	89.92 ± 15.42	107.01 ± 24.61	0.00245	0.0344	cg08721491	57.07 ± 5.16	61.18 ± 5.34	0.00251
DOM3Z	89.92 ± 15.42	107.01 ± 24.61	0.00245	0.0344	cg08721491	57.07 ± 5.16	61.18 ± 5.34	0.00251
DOM3Z	125.32 ± 33.38	154.96 ± 50.81	0.00285	0.0374	cg08721491	57.07 ± 5.16	61.18 ± 5.34	0.00251
DOM3Z	89.92 ± 15.42	107.01 ± 24.61	0.00245	0.0344	cg23945481	42.11 ± 3.58	44.39 ± 3.05	0.00652
DOM3Z	89.92 ± 15.42	107.01 ± 24.61	0.00245	0.0344	cg23945481	42.11 ± 3.58	44.39 ± 3.05	0.00652
DOM3Z	125.32 ± 33.38	154.96 ± 50.81	0.00285	0.0374	cg23945481	42.11 ± 3.58	44.39 ± 3.05	0.00652
DOM3Z	89.92 ± 15.42	107.01 ± 24.61	0.00245	0.0344	cg24870273	37 ± 5.82	42.15 ± 7.88	0.0088
DOM3Z	89.92 ± 15.42	107.01 ± 24.61	0.00245	0.0344	cg24870273	37 ± 5.82	42.15 ± 7.88	0.0088
DOM3Z	125.32 ± 33.38	154.96 ± 50.81	0.00285	0.0374	cg24870273	37 ± 5.82	42.15 ± 7.88	0.0088
DOM3Z	89.92 ± 15.42	107.01 ± 24.61	0.00245	0.0344	cg01883966	50.94 ± 6.03	56.3 ± 8.2	0.00937
DOM3Z	89.92 ± 15.42	107.01 ± 24.61	0.00245	0.0344	cg01883966	50.94 ± 6.03	56.3 ± 8.2	0.00937
DOM3Z	125.32 ± 33.38	154.96 ± 50.81	0.00285	0.0374	cg01883966	50.94 ± 6.03	56.3 ± 8.2	0.00937
DOM3Z	89.92 ± 15.42	107.01 ± 24.61	0.00245	0.0344	cg22850387	3.14 ± 0.36	3.42 ± 0.37	0.0217
DOM3Z	89.92 ± 15.42	107.01 ± 24.61	0.00245	0.0344	cg22850387	3.14 ± 0.36	3.42 ± 0.37	0.0217
DOM3Z	125.32 ± 33.38	154.96 ± 50.81	0.00285	0.0374	cg22850387	3.14 ± 0.36	3.42 ± 0.37	0.0217
DOM3Z	89.92 ± 15.42	107.01 ± 24.61	0.00245	0.0344	cg15063771	45.25 ± 4.08	48.48 ± 5.64	0.0226
DOM3Z	89.92 ± 15.42	107.01 ± 24.61	0.00245	0.0344	cg15063771	45.25 ± 4.08	48.48 ± 5.64	0.0226
DOM3Z	125.32 ± 33.38	154.96 ± 50.81	0.00285	0.0374	cg15063771	45.25 ± 4.08	48.48 ± 5.64	0.0226
DOM3Z	89.92 ± 15.42	107.01 ± 24.61	0.00245	0.0344	cg26029547	66.72 ± 3.03	68.92 ± 3.41	0.0249
DOM3Z	89.92 ± 15.42	107.01 ± 24.61	0.00245	0.0344	cg26029547	66.72 ± 3.03	68.92 ± 3.41	0.0249
DOM3Z	125.32 ± 33.38	154.96 ± 50.81	0.00285	0.0374	cg26029547	66.72 ± 3.03	68.92 ± 3.41	0.0249
DOM3Z	89.92 ± 15.42	107.01 ± 24.61	0.00245	0.0344	cg19864808	45.2 ± 6.12	48.35 ± 6.57	0.0421
DOM3Z	89.92 ± 15.42	107.01 ± 24.61	0.00245	0.0344	cg19864808	45.2 ± 6.12	48.35 ± 6.57	0.0421
DOM3Z	125.32 ± 33.38	154.96 ± 50.81	0.00285	0.0374	cg19864808	45.2 ± 6.12	48.35 ± 6.57	0.0421
DPM1	866.46 ± 68.94	943.35 ± 62.26	0.00398	0.0452	cg08178278	5.83 ± 1.03	4.81 ± 0.91	0.0161
DPYD	186.97 ± 46.45	161.82 ± 46.82	0.00139	0.0255	cg25969802	92.95 ± 1.87	94.93 ± 1.78	0.00765
DPYD	186.97 ± 46.45	161.82 ± 46.82	0.00139	0.0255	cg11232368	94.48 ± 1.21	93.14 ± 1.64	0.00927
DPYD	186.97 ± 46.45	161.82 ± 46.82	0.00139	0.0255	cg24682415	91.47 ± 1.67	92.81 ± 2.64	0.0164
DPYD	186.97 ± 46.45	161.82 ± 46.82	0.00139	0.0255	cg06323897	3.14 ± 0.64	2.68 ± 0.46	0.0263
DPYD	186.97 ± 46.45	161.82 ± 46.82	0.00139	0.0255	cg15991546	8.49 ± 1.93	7.37 ± 1.83	0.0325
DPYD	186.97 ± 46.45	161.82 ± 46.82	0.00139	0.0255	cg14072140	90.88 ± 2.47	92.06 ± 2.33	0.04
DSC2	512.59 ± 140.32	469.89 ± 137.97	0.000198	0.00935	cg06973234	3.58 ± 0.55	3.07 ± 0.78	0.00353
DSC2	512.59 ± 140.32	469.89 ± 137.97	0.000198	0.00935	cg05110943	11.04 ± 2.23	9.89 ± 2.16	0.0105
DSC2	512.59 ± 140.32	469.89 ± 137.97	0.000198	0.00935	cg27051931	4.11 ± 0.43	3.63 ± 0.46	0.0376
DSE	237.06 ± 66.87	203.55 ± 65.27	0.00187	0.03	cg19869037	30.65 ± 5.73	35.15 ± 5.35	0.00304
DSE	237.06 ± 66.87	203.55 ± 65.27	0.00187	0.03	cg19341652	13.44 ± 4.29	17.35 ± 5.27	0.0104
DSE	237.06 ± 66.87	203.55 ± 65.27	0.00187	0.03	cg18597292	5.7 ± 1.34	6.62 ± 1.38	0.0358
DSE	237.06 ± 66.87	203.55 ± 65.27	0.00187	0.03	cg25091829	15.01 ± 1.66	13.86 ± 1.07	0.0386
DSE	237.06 ± 66.87	203.55 ± 65.27	0.00187	0.03	cg17179831	91.29 ± 2.73	93.33 ± 2.92	0.0496
DTX3L	370.11 ± 70.5	335.5 ± 55.92	0.00322	0.0404	cg07916070	3.59 ± 0.33	3.24 ± 0.39	0.012
DTX4	116.56 ± 20.59	95.1 ± 14.62	0.000149	0.00814	cg05591545	3.32 ± 0.57	2.85 ± 0.42	0.00328
DTX4	116.56 ± 20.59	95.1 ± 14.62	0.000149	0.00814	cg00480896	4.39 ± 0.63	5.19 ± 1.03	0.012
DUOX2	997.3 ± 525.01	739.24 ± 469.77	0.00013	0.0077	cg21267231	12.44 ± 3.2	11.77 ± 3.08	0.0359
DUSP1	1061.34 ± 462.3	1166.88 ± 497.75	0.000193	0.00925	cg17429424	4.27 ± 0.47	3.85 ± 0.5	0.0216
DUSP26	206.52 ± 68.89	247.34 ± 87.44	0.000757	0.0184	cg01869632	68.78 ± 8.89	73.6 ± 7.75	0.00665
DUSP26	206.52 ± 68.89	247.34 ± 87.44	0.000757	0.0184	cg19863319	2.08 ± 0.25	1.83 ± 0.2	0.0129
DUSP26	206.52 ± 68.89	247.34 ± 87.44	0.000757	0.0184	cg25738273	3.96 ± 0.66	3.53 ± 0.77	0.0212
DUSP5	357.01 ± 61.36	433.26 ± 75.29	0.00461	0.0494	cg14943877	2.27 ± 0.36	1.92 ± 0.27	0.01
DUSP5	357.01 ± 61.36	433.26 ± 75.29	0.00461	0.0494	cg06715928	8.07 ± 1.01	6.93 ± 0.91	0.0102
DUSP5	357.01 ± 61.36	433.26 ± 75.29	0.00461	0.0494	cg03290131	15.49 ± 2.59	16.93 ± 3.19	0.0372
DYM	344.37 ± 23.32	379.34 ± 35.59	0.00278	0.037	cg23865597	72.87 ± 5.82	69.68 ± 4.94	0.0102
DYM	344.37 ± 23.32	379.34 ± 35.59	0.00278	0.037	cg19495149	94.68 ± 1.33	93.93 ± 1.67	0.0226
DYNLT3	933.62 ± 137.62	1038.16 ± 161.49	0.00171	0.0287	cg12221218	41.98 ± 8.96	48.14 ± 4.91	0.00229
DYRK2	204.14 ± 11.7	184.36 ± 7.4	5.67e-05	0.00535	cg22621695	16.73 ± 1.57	15.88 ± 1.47	0.0249
DYRK2	204.14 ± 11.7	184.36 ± 7.4	5.67e-05	0.00535	cg20840177	6.21 ± 0.82	5.63 ± 0.93	0.0368
DYRK3	126.25 ± 11.42	141.29 ± 17.02	0.000966	0.0207	cg18759190	23.73 ± 3.53	25.48 ± 3.95	0.00204
DYRK3	126.25 ± 11.42	141.29 ± 17.02	0.000966	0.0207	cg16575248	2.58 ± 0.39	2.23 ± 0.47	0.0307
E2F6	202.87 ± 24.05	217.05 ± 25.46	0.00348	0.0419	cg06239478	13.24 ± 1.8	11.53 ± 1.84	0.0312
E2F6	202.87 ± 24.05	217.05 ± 25.46	0.00348	0.0419	cg10206987	94.78 ± 1.56	95.96 ± 1.2	0.0322
EBF1	64.24 ± 19.28	53.27 ± 10.74	0.00284	0.0374	cg15963563	8.43 ± 1.39	7.35 ± 1.31	0.00948
EBF1	64.24 ± 19.28	53.27 ± 10.74	0.00284	0.0374	cg26117521	61.95 ± 8.28	66.49 ± 7.11	0.0184
EBF1	64.24 ± 19.28	53.27 ± 10.74	0.00284	0.0374	cg21191843	68.49 ± 8.07	72.48 ± 7.25	0.039
ECE1	666.67 ± 49.23	611.63 ± 57.13	0.000311	0.0117	cg01977520	84.01 ± 1.39	85.44 ± 0.87	0.00115
ECE1	666.67 ± 49.23	611.63 ± 57.13	0.000311	0.0117	cg16416158	69.85 ± 6.4	73.28 ± 8.18	0.00851
ECE1	666.67 ± 49.23	611.63 ± 57.13	0.000311	0.0117	cg05954918	35.39 ± 7	38.09 ± 7.49	0.00985
ECE1	666.67 ± 49.23	611.63 ± 57.13	0.000311	0.0117	cg05370193	92.1 ± 1.6	93.49 ± 1.3	0.011
ECE1	666.67 ± 49.23	611.63 ± 57.13	0.000311	0.0117	cg23029526	3.87 ± 0.54	4.27 ± 0.4	0.0112
ECE1	666.67 ± 49.23	611.63 ± 57.13	0.000311	0.0117	cg13086983	13.15 ± 3.65	16.13 ± 6.32	0.0118
ECE1	666.67 ± 49.23	611.63 ± 57.13	0.000311	0.0117	cg00964400	50.15 ± 2.28	51.67 ± 2.39	0.0126
ECE1	666.67 ± 49.23	611.63 ± 57.13	0.000311	0.0117	cg19165640	53.5 ± 4.76	57.74 ± 3.48	0.0132
ECE1	666.67 ± 49.23	611.63 ± 57.13	0.000311	0.0117	cg13212362	60.9 ± 10.36	58.14 ± 10.01	0.0138
ECE1	666.67 ± 49.23	611.63 ± 57.13	0.000311	0.0117	cg13551754	63.49 ± 3.85	66.72 ± 4.18	0.0281
ECE1	666.67 ± 49.23	611.63 ± 57.13	0.000311	0.0117	cg25007705	23.39 ± 10.45	28.79 ± 14.24	0.0295
ECE1	666.67 ± 49.23	611.63 ± 57.13	0.000311	0.0117	cg05364829	4.73 ± 0.48	4.34 ± 0.58	0.0315
ECE1	666.67 ± 49.23	611.63 ± 57.13	0.000311	0.0117	cg00228796	60.29 ± 5.76	62.78 ± 5.29	0.0434
EDEM1	247.95 ± 19.57	288.57 ± 39.14	0.00411	0.0462	cg12525224	4.73 ± 0.68	4.12 ± 0.48	0.0156
EDEM1	247.95 ± 19.57	288.57 ± 39.14	0.00411	0.0462	cg01815263	35.75 ± 4.44	38.11 ± 4.83	0.0218
EDEM2	218.35 ± 22.68	268.42 ± 31.88	0.000218	0.00981	cg10789151	2.18 ± 0.29	1.89 ± 0.31	0.0479
EDIL3	867.86 ± 333.49	1187.14 ± 488.06	4.06e-06	0.0021	cg04512917	11.61 ± 2.52	13.79 ± 2.54	0.000166
EDIL3	867.86 ± 333.49	1187.14 ± 488.06	4.06e-06	0.0021	cg12460433	4.02 ± 0.81	3.24 ± 0.63	0.0204
EDIL3	867.86 ± 333.49	1187.14 ± 488.06	4.06e-06	0.0021	cg07690181	4.43 ± 0.57	4.99 ± 0.69	0.0488
EDN3	243.44 ± 107.81	340.09 ± 182.19	0.000133	0.00773	cg13919285	29.99 ± 4.56	28.06 ± 5.28	0.0426
EDNRA	237.81 ± 141.13	176.48 ± 134.18	0.00121	0.0235	cg05102394	20.66 ± 3.08	23.05 ± 2.48	0.00362
EDNRA	237.81 ± 141.13	176.48 ± 134.18	0.00121	0.0235	cg00974629	77.95 ± 5.02	80.35 ± 4.36	0.0176
EDNRA	237.81 ± 141.13	176.48 ± 134.18	0.00121	0.0235	cg00379467	43.82 ± 3.79	45.71 ± 2.64	0.0406
EDNRA	237.81 ± 141.13	176.48 ± 134.18	0.00121	0.0235	cg12009023	5.56 ± 1.31	6.4 ± 1.57	0.0497
EEF1A2	368.97 ± 110.35	441.87 ± 142.15	3.14e-06	0.00197	cg23851167	60.63 ± 3.82	62.78 ± 4.45	0.00711
EEF1A2	368.97 ± 110.35	441.87 ± 142.15	3.14e-06	0.00197	cg12340651	87.07 ± 4.9	89.28 ± 4.16	0.0112
EEF1A2	368.97 ± 110.35	441.87 ± 142.15	3.14e-06	0.00197	cg03074225	75.34 ± 2.29	76.84 ± 1.99	0.0124
EEF1A2	368.97 ± 110.35	441.87 ± 142.15	3.14e-06	0.00197	cg17426146	97.47 ± 0.51	97.9 ± 0.44	0.0345
EEPD1	93.95 ± 15.05	81.47 ± 9.98	0.000256	0.0105	cg16107103	68.72 ± 2.74	71.92 ± 3.92	0.00197
EEPD1	93.95 ± 15.05	81.47 ± 9.98	0.000256	0.0105	cg02811067	90.16 ± 3.06	91.49 ± 2.42	0.021
EEPD1	93.95 ± 15.05	81.47 ± 9.98	0.000256	0.0105	cg13011331	75.17 ± 2.45	77.56 ± 1.86	0.0233
EEPD1	93.95 ± 15.05	81.47 ± 9.98	0.000256	0.0105	cg01449168	78.9 ± 4.87	81.64 ± 2.76	0.0381
EFNB2	115.55 ± 33.63	94.43 ± 27.15	0.000277	0.011	cg12053155	14.15 ± 2.97	15.79 ± 3.18	0.0101
EFNB2	115.55 ± 33.63	94.43 ± 27.15	0.000277	0.011	cg03929741	10.54 ± 1.04	9.31 ± 1.39	0.0117
EFNB2	115.55 ± 33.63	94.43 ± 27.15	0.000277	0.011	cg12674145	95.72 ± 0.7	96.47 ± 0.66	0.0151
EFTUD1	162.57 ± 33.2	198.07 ± 21.36	0.00251	0.0349	cg11401820	61.05 ± 9.89	64.36 ± 10.37	0.0493
EFTUD1	112.62 ± 12.82	136.09 ± 14.93	0.000364	0.0126	cg11401820	61.05 ± 9.89	64.36 ± 10.37	0.0493
EHMT2	149.38 ± 11.92	128.44 ± 15.79	0.00111	0.0224	cg27253757	93.93 ± 1.16	95.62 ± 0.74	0.000209
EHMT2	149.38 ± 11.92	128.44 ± 15.79	0.00111	0.0224	cg27253757	93.93 ± 1.16	95.62 ± 0.74	0.000209
EHMT2	149.38 ± 11.92	128.44 ± 15.79	0.00111	0.0224	cg21087321	73.35 ± 10.52	78.22 ± 9.71	0.00152
EHMT2	149.38 ± 11.92	128.44 ± 15.79	0.00111	0.0224	cg21087321	73.35 ± 10.52	78.22 ± 9.71	0.00152
EHMT2	149.38 ± 11.92	128.44 ± 15.79	0.00111	0.0224	cg20422968	70.37 ± 3.45	73.79 ± 3.57	0.00238
EHMT2	149.38 ± 11.92	128.44 ± 15.79	0.00111	0.0224	cg20422968	70.37 ± 3.45	73.79 ± 3.57	0.00238
EHMT2	149.38 ± 11.92	128.44 ± 15.79	0.00111	0.0224	cg01168115	71.49 ± 3.02	73.6 ± 3.38	0.00241
EHMT2	149.38 ± 11.92	128.44 ± 15.79	0.00111	0.0224	cg01168115	71.49 ± 3.02	73.6 ± 3.38	0.00241
EHMT2	149.38 ± 11.92	128.44 ± 15.79	0.00111	0.0224	cg12087303	77.18 ± 3.49	79.98 ± 3.27	0.0033
EHMT2	149.38 ± 11.92	128.44 ± 15.79	0.00111	0.0224	cg12087303	77.18 ± 3.49	79.98 ± 3.27	0.0033
EHMT2	149.38 ± 11.92	128.44 ± 15.79	0.00111	0.0224	cg22858549	5.34 ± 0.51	4.37 ± 0.72	0.00358
EHMT2	149.38 ± 11.92	128.44 ± 15.79	0.00111	0.0224	cg22858549	5.34 ± 0.51	4.37 ± 0.72	0.00358
EHMT2	149.38 ± 11.92	128.44 ± 15.79	0.00111	0.0224	cg00210002	4.94 ± 1.49	6.48 ± 1.26	0.00443
EHMT2	149.38 ± 11.92	128.44 ± 15.79	0.00111	0.0224	cg00210002	4.94 ± 1.49	6.48 ± 1.26	0.00443
EHMT2	149.38 ± 11.92	128.44 ± 15.79	0.00111	0.0224	cg17750075	86.9 ± 2.8	88.74 ± 2.54	0.00775
EHMT2	149.38 ± 11.92	128.44 ± 15.79	0.00111	0.0224	cg17750075	86.9 ± 2.8	88.74 ± 2.54	0.00775
EHMT2	149.38 ± 11.92	128.44 ± 15.79	0.00111	0.0224	cg08846333	83.94 ± 2.61	86.33 ± 2.33	0.0096
EHMT2	149.38 ± 11.92	128.44 ± 15.79	0.00111	0.0224	cg08846333	83.94 ± 2.61	86.33 ± 2.33	0.0096
EHMT2	149.38 ± 11.92	128.44 ± 15.79	0.00111	0.0224	cg27624310	84.08 ± 3.24	87.43 ± 1.97	0.00985
EHMT2	149.38 ± 11.92	128.44 ± 15.79	0.00111	0.0224	cg27624310	84.08 ± 3.24	87.43 ± 1.97	0.00985
EHMT2	149.38 ± 11.92	128.44 ± 15.79	0.00111	0.0224	cg04874267	88.22 ± 5.55	90.17 ± 3.74	0.0102
EHMT2	149.38 ± 11.92	128.44 ± 15.79	0.00111	0.0224	cg04874267	88.22 ± 5.55	90.17 ± 3.74	0.0102
EHMT2	149.38 ± 11.92	128.44 ± 15.79	0.00111	0.0224	cg10909324	5.19 ± 0.82	6.21 ± 0.71	0.0113
EHMT2	149.38 ± 11.92	128.44 ± 15.79	0.00111	0.0224	cg10909324	5.19 ± 0.82	6.21 ± 0.71	0.0113
EHMT2	149.38 ± 11.92	128.44 ± 15.79	0.00111	0.0224	cg00028757	96.2 ± 0.73	96.76 ± 0.78	0.0113
EHMT2	149.38 ± 11.92	128.44 ± 15.79	0.00111	0.0224	cg00028757	96.2 ± 0.73	96.76 ± 0.78	0.0113
EHMT2	149.38 ± 11.92	128.44 ± 15.79	0.00111	0.0224	cg10467968	63 ± 3.04	65.15 ± 2.46	0.0126
EHMT2	149.38 ± 11.92	128.44 ± 15.79	0.00111	0.0224	cg10467968	63 ± 3.04	65.15 ± 2.46	0.0126
EHMT2	149.38 ± 11.92	128.44 ± 15.79	0.00111	0.0224	cg25981875	71.58 ± 6.39	74.3 ± 5.66	0.013
EHMT2	149.38 ± 11.92	128.44 ± 15.79	0.00111	0.0224	cg25981875	71.58 ± 6.39	74.3 ± 5.66	0.013
EHMT2	149.38 ± 11.92	128.44 ± 15.79	0.00111	0.0224	cg11209988	95.64 ± 0.56	96.17 ± 0.66	0.0146
EHMT2	149.38 ± 11.92	128.44 ± 15.79	0.00111	0.0224	cg11209988	95.64 ± 0.56	96.17 ± 0.66	0.0146
EHMT2	149.38 ± 11.92	128.44 ± 15.79	0.00111	0.0224	cg02764416	93.15 ± 0.6	93.81 ± 1.14	0.0152
EHMT2	149.38 ± 11.92	128.44 ± 15.79	0.00111	0.0224	cg02764416	93.15 ± 0.6	93.81 ± 1.14	0.0152
EHMT2	149.38 ± 11.92	128.44 ± 15.79	0.00111	0.0224	cg19965962	92 ± 1.04	92.89 ± 1.4	0.0159
EHMT2	149.38 ± 11.92	128.44 ± 15.79	0.00111	0.0224	cg19965962	92 ± 1.04	92.89 ± 1.4	0.0159
EHMT2	149.38 ± 11.92	128.44 ± 15.79	0.00111	0.0224	cg22999989	60.63 ± 3.16	63.08 ± 4.09	0.017
EHMT2	149.38 ± 11.92	128.44 ± 15.79	0.00111	0.0224	cg22999989	60.63 ± 3.16	63.08 ± 4.09	0.017
EHMT2	149.38 ± 11.92	128.44 ± 15.79	0.00111	0.0224	cg09134341	93.64 ± 1.2	94.52 ± 1.23	0.018
EHMT2	149.38 ± 11.92	128.44 ± 15.79	0.00111	0.0224	cg09134341	93.64 ± 1.2	94.52 ± 1.23	0.018
EHMT2	149.38 ± 11.92	128.44 ± 15.79	0.00111	0.0224	cg27363691	77.62 ± 8.76	81.14 ± 8.4	0.0185
EHMT2	149.38 ± 11.92	128.44 ± 15.79	0.00111	0.0224	cg27363691	77.62 ± 8.76	81.14 ± 8.4	0.0185
EHMT2	149.38 ± 11.92	128.44 ± 15.79	0.00111	0.0224	cg02758274	87.32 ± 2.79	88.26 ± 3.26	0.0209
EHMT2	149.38 ± 11.92	128.44 ± 15.79	0.00111	0.0224	cg02758274	87.32 ± 2.79	88.26 ± 3.26	0.0209
EHMT2	149.38 ± 11.92	128.44 ± 15.79	0.00111	0.0224	cg25633383	76.13 ± 4.13	78.19 ± 5.59	0.021
EHMT2	149.38 ± 11.92	128.44 ± 15.79	0.00111	0.0224	cg25633383	76.13 ± 4.13	78.19 ± 5.59	0.021
EHMT2	149.38 ± 11.92	128.44 ± 15.79	0.00111	0.0224	cg21190306	80.34 ± 2.1	82.17 ± 1.26	0.0215
EHMT2	149.38 ± 11.92	128.44 ± 15.79	0.00111	0.0224	cg21190306	80.34 ± 2.1	82.17 ± 1.26	0.0215
EHMT2	149.38 ± 11.92	128.44 ± 15.79	0.00111	0.0224	cg23798942	77.67 ± 3.73	79.17 ± 3.72	0.0232
EHMT2	149.38 ± 11.92	128.44 ± 15.79	0.00111	0.0224	cg23798942	77.67 ± 3.73	79.17 ± 3.72	0.0232
EHMT2	149.38 ± 11.92	128.44 ± 15.79	0.00111	0.0224	cg25644015	90.46 ± 1.27	91.32 ± 1.44	0.0241
EHMT2	149.38 ± 11.92	128.44 ± 15.79	0.00111	0.0224	cg25644015	90.46 ± 1.27	91.32 ± 1.44	0.0241
EHMT2	149.38 ± 11.92	128.44 ± 15.79	0.00111	0.0224	cg21472542	89.58 ± 1.85	91.09 ± 1.54	0.0251
EHMT2	149.38 ± 11.92	128.44 ± 15.79	0.00111	0.0224	cg21472542	89.58 ± 1.85	91.09 ± 1.54	0.0251
EHMT2	149.38 ± 11.92	128.44 ± 15.79	0.00111	0.0224	cg03164052	95.25 ± 0.91	95.93 ± 0.76	0.0266
EHMT2	149.38 ± 11.92	128.44 ± 15.79	0.00111	0.0224	cg03164052	95.25 ± 0.91	95.93 ± 0.76	0.0266
EHMT2	149.38 ± 11.92	128.44 ± 15.79	0.00111	0.0224	cg09327035	78.61 ± 4.72	80.63 ± 5.05	0.0283
EHMT2	149.38 ± 11.92	128.44 ± 15.79	0.00111	0.0224	cg09327035	78.61 ± 4.72	80.63 ± 5.05	0.0283
EHMT2	149.38 ± 11.92	128.44 ± 15.79	0.00111	0.0224	cg14955103	56.69 ± 2.23	58.67 ± 3.09	0.0287
EHMT2	149.38 ± 11.92	128.44 ± 15.79	0.00111	0.0224	cg14955103	56.69 ± 2.23	58.67 ± 3.09	0.0287
EHMT2	149.38 ± 11.92	128.44 ± 15.79	0.00111	0.0224	cg06398287	80.67 ± 3.35	82.24 ± 3.86	0.0293
EHMT2	149.38 ± 11.92	128.44 ± 15.79	0.00111	0.0224	cg06398287	80.67 ± 3.35	82.24 ± 3.86	0.0293
EHMT2	149.38 ± 11.92	128.44 ± 15.79	0.00111	0.0224	cg07433449	74.34 ± 2.35	76.22 ± 2.23	0.0301
EHMT2	149.38 ± 11.92	128.44 ± 15.79	0.00111	0.0224	cg07433449	74.34 ± 2.35	76.22 ± 2.23	0.0301
EHMT2	149.38 ± 11.92	128.44 ± 15.79	0.00111	0.0224	cg04983519	75.61 ± 2.9	77.95 ± 1.57	0.0309
EHMT2	149.38 ± 11.92	128.44 ± 15.79	0.00111	0.0224	cg04983519	75.61 ± 2.9	77.95 ± 1.57	0.0309
EHMT2	149.38 ± 11.92	128.44 ± 15.79	0.00111	0.0224	cg11180771	3.55 ± 0.72	4.44 ± 1.1	0.0352
EHMT2	149.38 ± 11.92	128.44 ± 15.79	0.00111	0.0224	cg11180771	3.55 ± 0.72	4.44 ± 1.1	0.0352
EHMT2	149.38 ± 11.92	128.44 ± 15.79	0.00111	0.0224	cg22397673	75.93 ± 3.4	77.82 ± 3	0.0365
EHMT2	149.38 ± 11.92	128.44 ± 15.79	0.00111	0.0224	cg22397673	75.93 ± 3.4	77.82 ± 3	0.0365
EHMT2	149.38 ± 11.92	128.44 ± 15.79	0.00111	0.0224	cg21490342	76.42 ± 3.66	79.17 ± 3.67	0.0377
EHMT2	149.38 ± 11.92	128.44 ± 15.79	0.00111	0.0224	cg21490342	76.42 ± 3.66	79.17 ± 3.67	0.0377
EHMT2	149.38 ± 11.92	128.44 ± 15.79	0.00111	0.0224	cg03146965	91.56 ± 1.75	90.58 ± 1.53	0.0392
EHMT2	149.38 ± 11.92	128.44 ± 15.79	0.00111	0.0224	cg03146965	91.56 ± 1.75	90.58 ± 1.53	0.0392
EHMT2	149.38 ± 11.92	128.44 ± 15.79	0.00111	0.0224	cg22048274	67.31 ± 3.15	70.53 ± 2.57	0.0406
EHMT2	149.38 ± 11.92	128.44 ± 15.79	0.00111	0.0224	cg22048274	67.31 ± 3.15	70.53 ± 2.57	0.0406
EHMT2	149.38 ± 11.92	128.44 ± 15.79	0.00111	0.0224	cg25165975	69.9 ± 2.81	71.91 ± 2.25	0.0432
EHMT2	149.38 ± 11.92	128.44 ± 15.79	0.00111	0.0224	cg25165975	69.9 ± 2.81	71.91 ± 2.25	0.0432
EHMT2	149.38 ± 11.92	128.44 ± 15.79	0.00111	0.0224	cg05720054	84.7 ± 14.27	86.09 ± 15.5	0.0465
EHMT2	149.38 ± 11.92	128.44 ± 15.79	0.00111	0.0224	cg05720054	84.7 ± 14.27	86.09 ± 15.5	0.0465
EHMT2	149.38 ± 11.92	128.44 ± 15.79	0.00111	0.0224	cg14518907	94.47 ± 0.95	95.19 ± 0.78	0.048
EHMT2	149.38 ± 11.92	128.44 ± 15.79	0.00111	0.0224	cg14518907	94.47 ± 0.95	95.19 ± 0.78	0.048
EIF2AK1	1248.47 ± 162.33	1364.77 ± 215.71	0.00178	0.0291	cg06731904	75.3 ± 4.72	78.83 ± 3.99	0.000789
EIF2AK1	1248.47 ± 162.33	1364.77 ± 215.71	0.00178	0.0291	cg00564916	94.92 ± 0.93	95.83 ± 0.62	0.0182
EIF2AK3	372.97 ± 55.15	433.97 ± 69.96	0.00306	0.0391	cg10854158	4.41 ± 0.52	4.81 ± 0.44	0.0323
EIF2AK3	372.97 ± 55.15	433.97 ± 69.96	0.00306	0.0391	cg20349687	3.37 ± 0.82	2.9 ± 0.31	0.0353
EIF2S2	155.13 ± 27.11	184.65 ± 35.79	0.00207	0.0315	cg17711587	3.07 ± 0.52	2.72 ± 0.38	0.0055
EIF2S2	155.13 ± 27.11	184.65 ± 35.79	0.00207	0.0315	cg11453190	86.52 ± 1.76	88.06 ± 1.27	0.0167
EIF2S2	155.13 ± 27.11	184.65 ± 35.79	0.00207	0.0315	cg05026540	5.54 ± 1.03	5.04 ± 1.01	0.0279
EIF3F	210.89 ± 14.82	191.36 ± 16.74	0.00306	0.0391	cg02164407	6.84 ± 1.28	8.65 ± 1.46	0.00129
EIF3F	210.89 ± 14.82	191.36 ± 16.74	0.00306	0.0391	cg15129777	2.54 ± 0.35	2.16 ± 0.31	0.028
EIF4E1B	114.5 ± 10.78	125.4 ± 8.04	0.00118	0.0233	cg25444839	13.35 ± 5.32	16.26 ± 6.15	0.0228
EIF4EBP1	250.45 ± 67.16	283.62 ± 74.78	0.00122	0.0236	cg02138124	58.77 ± 4.95	62.51 ± 4.65	0.0159
EIF4EBP1	250.45 ± 67.16	283.62 ± 74.78	0.00122	0.0236	cg09510263	4.38 ± 0.77	3.75 ± 0.67	0.0364
EIF4EBP2	1215.98 ± 230.83	1076.44 ± 227.26	3.11e-05	0.0043	cg20621021	5.84 ± 1.03	7.1 ± 1.27	0.0168
EIF4EBP2	1215.98 ± 230.83	1076.44 ± 227.26	3.11e-05	0.0043	cg02162544	4.86 ± 0.93	4.08 ± 0.65	0.0222
EIF4EBP2	1215.98 ± 230.83	1076.44 ± 227.26	3.11e-05	0.0043	cg05523877	91.23 ± 0.67	92.08 ± 1.17	0.0304
EIF5	915.37 ± 80.72	1031.5 ± 103.97	0.0027	0.0363	cg11508373	1.97 ± 0.31	1.72 ± 0.21	0.00943
ELF3	334.95 ± 116.15	278.52 ± 90.44	7.37e-05	0.00581	cg04125586	69.03 ± 6.23	65.05 ± 9.81	0.0333
ELF3	334.95 ± 116.15	278.52 ± 90.44	7.37e-05	0.00581	cg07154254	15.01 ± 2.88	13.62 ± 3.5	0.0459
ELL2	1159.81 ± 219.21	1625.93 ± 281.14	4.83e-07	0.00152	cg10483112	65.61 ± 14.64	73.9 ± 13.59	0.0117
ELL2	1430.15 ± 198.1	1877.38 ± 300.86	5.94e-07	0.00155	cg10483112	65.61 ± 14.64	73.9 ± 13.59	0.0117
ELL2	1159.81 ± 219.21	1625.93 ± 281.14	4.83e-07	0.00152	cg11571761	3.76 ± 0.67	4.39 ± 0.76	0.0359
ELL2	1430.15 ± 198.1	1877.38 ± 300.86	5.94e-07	0.00155	cg11571761	3.76 ± 0.67	4.39 ± 0.76	0.0359
ELL2	1159.81 ± 219.21	1625.93 ± 281.14	4.83e-07	0.00152	cg07883722	95.48 ± 1.49	94.59 ± 2.38	0.0422
ELL2	1430.15 ± 198.1	1877.38 ± 300.86	5.94e-07	0.00155	cg07883722	95.48 ± 1.49	94.59 ± 2.38	0.0422
ELL2	1159.81 ± 219.21	1625.93 ± 281.14	4.83e-07	0.00152	cg19493250	64.54 ± 11.1	70.33 ± 11.56	0.0454
ELL2	1430.15 ± 198.1	1877.38 ± 300.86	5.94e-07	0.00155	cg19493250	64.54 ± 11.1	70.33 ± 11.56	0.0454
ELOVL2	43.26 ± 12.12	35.5 ± 9.4	0.00121	0.0236	cg16323298	29.61 ± 2.42	32.19 ± 4.2	0.0143
ELOVL2	43.26 ± 12.12	35.5 ± 9.4	0.00121	0.0236	cg01799681	39.57 ± 7.63	43.44 ± 8.75	0.0187
ELOVL2	43.26 ± 12.12	35.5 ± 9.4	0.00121	0.0236	cg21572722	29.45 ± 6.48	30.72 ± 5.6	0.0476
EMD	224.29 ± 17.84	266.82 ± 26.75	7.68e-05	0.00591	cg04344997	18.35 ± 15.31	16.92 ± 14.48	0.00512
EMD	224.29 ± 17.84	266.82 ± 26.75	7.68e-05	0.00591	cg23443158	23.07 ± 21.41	22.32 ± 21.3	0.0194
ENAH	345.26 ± 75.14	288.31 ± 75.11	0.00116	0.023	cg21410954	53.27 ± 15.76	60.02 ± 15.8	0.00137
ENAH	345.26 ± 75.14	288.31 ± 75.11	0.00116	0.023	cg07790831	57.99 ± 3.24	61.61 ± 2.83	0.0121
ENG	268.46 ± 66.31	205.17 ± 62.22	4.34e-05	0.00488	cg13458609	43.32 ± 5.31	39.84 ± 6.77	0.0106
ENKUR	14.7 ± 4.39	22 ± 8.88	0.00175	0.0289	cg26938599	94.82 ± 1.4	95.85 ± 1.8	0.0235
EPB41L4A	120.2 ± 25.72	98.52 ± 26.35	0.00197	0.0309	cg04486725	93.5 ± 1.64	94.8 ± 1.06	0.00185
EPB41L4A	120.2 ± 25.72	98.52 ± 26.35	0.00197	0.0309	cg00116628	7.59 ± 0.75	6.9 ± 1.02	0.0123
EPB41L4A	120.2 ± 25.72	98.52 ± 26.35	0.00197	0.0309	cg14798584	65.43 ± 4.25	67.96 ± 3.95	0.0296
EPHB4	131.93 ± 26.39	118.87 ± 31.92	0.00127	0.0242	cg19365706	94.8 ± 0.93	95.45 ± 0.66	0.0189
EPHB4	131.93 ± 26.39	118.87 ± 31.92	0.00127	0.0242	cg18563348	88.22 ± 2.13	89.52 ± 2.29	0.0316
EPHB4	131.93 ± 26.39	118.87 ± 31.92	0.00127	0.0242	cg22614265	3.8 ± 0.59	3.32 ± 0.65	0.0352
EPHB4	131.93 ± 26.39	118.87 ± 31.92	0.00127	0.0242	cg01869186	23.35 ± 6.71	21.66 ± 6.23	0.0362
EPHB4	131.93 ± 26.39	118.87 ± 31.92	0.00127	0.0242	cg22644163	86.91 ± 4.24	88.35 ± 4.39	0.0367
EPHB6	82.11 ± 19.51	68.54 ± 12.01	0.00321	0.0403	cg03217572	90.14 ± 2.86	91.46 ± 2.19	0.016
EPHB6	82.11 ± 19.51	68.54 ± 12.01	0.00321	0.0403	cg14349531	75.75 ± 3.99	78.61 ± 4.5	0.0208
EPHB6	82.11 ± 19.51	68.54 ± 12.01	0.00321	0.0403	cg03386508	6.33 ± 0.76	5.87 ± 0.94	0.0463
EPHX1	669.36 ± 161.88	527.37 ± 139.97	8.89e-05	0.00639	cg03459809	16.73 ± 5.33	20.7 ± 5.53	0.0119
EPHX1	669.36 ± 161.88	527.37 ± 139.97	8.89e-05	0.00639	cg00396625	6.47 ± 0.37	5.92 ± 0.72	0.0145
EPHX1	669.36 ± 161.88	527.37 ± 139.97	8.89e-05	0.00639	cg11967292	4.91 ± 0.45	5.44 ± 0.68	0.0262
EPHX1	669.36 ± 161.88	527.37 ± 139.97	8.89e-05	0.00639	cg17468616	47.81 ± 6.77	51.91 ± 8.03	0.0428
EPHX1	669.36 ± 161.88	527.37 ± 139.97	8.89e-05	0.00639	cg11135003	2.76 ± 0.16	2.9 ± 0.18	0.045
EPS8	576.88 ± 161.28	452.88 ± 163.19	0.000479	0.0145	cg23784313	4.92 ± 1.05	4.37 ± 1.1	0.0243
EPS8	576.88 ± 161.28	452.88 ± 163.19	0.000479	0.0145	cg03496777	74.51 ± 3.67	77.55 ± 3.02	0.0278
EPS8	576.88 ± 161.28	452.88 ± 163.19	0.000479	0.0145	cg00033668	4.61 ± 0.59	4.15 ± 0.67	0.0457
EPS8	576.88 ± 161.28	452.88 ± 163.19	0.000479	0.0145	cg01975858	87.17 ± 3.35	89.48 ± 2.47	0.0479
ERBB2	201.72 ± 51.51	176.46 ± 42.85	0.00076	0.0184	cg14377681	69.63 ± 2.18	72.39 ± 2.73	0.0027
ERBB2	201.72 ± 51.51	176.46 ± 42.85	0.00076	0.0184	cg13263114	16.77 ± 4.9	14.28 ± 4.3	0.023
ERBB2	201.72 ± 51.51	176.46 ± 42.85	0.00076	0.0184	cg27005179	12.22 ± 3.88	11.45 ± 4.26	0.0421
ERBB2	201.72 ± 51.51	176.46 ± 42.85	0.00076	0.0184	cg16065186	11.53 ± 4.03	10.19 ± 4.55	0.0464
ERBB2	201.72 ± 51.51	176.46 ± 42.85	0.00076	0.0184	cg26111030	3.24 ± 0.55	2.77 ± 0.45	0.047
ERBB2IP	459.55 ± 60.43	408.48 ± 75.39	0.00285	0.0374	cg07005688	95.85 ± 0.78	96.55 ± 0.54	0.00596
ERBB2IP	459.55 ± 60.43	408.48 ± 75.39	0.00285	0.0374	cg20274746	4.55 ± 0.72	4.17 ± 1.04	0.0411
ERCC6	191.31 ± 23.63	170.99 ± 20.15	0.00188	0.03	cg25656283	72.19 ± 8.13	76.4 ± 6.07	0.0275
ERCC6	191.31 ± 23.63	170.99 ± 20.15	0.00188	0.03	cg01982597	49.81 ± 13.69	55.34 ± 14.33	0.0335
ERCC6	191.31 ± 23.63	170.99 ± 20.15	0.00188	0.03	cg00025044	92.2 ± 1.86	93.35 ± 2.38	0.047
ERGIC1	621.75 ± 114.91	544.94 ± 125.69	0.00169	0.0286	cg06911974	87.93 ± 2.89	89.3 ± 2.36	0.0338
ERGIC1	621.75 ± 114.91	544.94 ± 125.69	0.00169	0.0286	cg13582457	75.85 ± 5.24	78.37 ± 3.89	0.0434
ERMN	28.55 ± 29.98	34.46 ± 25.37	0.000117	0.00739	cg10812717	56.95 ± 12.03	63.77 ± 12.41	0.00481
ERMN	28.55 ± 29.98	34.46 ± 25.37	0.000117	0.00739	cg05081953	14.34 ± 6.03	16.59 ± 7.05	0.0312
ERMP1	510.85 ± 89.07	436.72 ± 62.06	0.000976	0.0208	cg05958438	88.45 ± 3.28	90.58 ± 2.31	0.00153
ERMP1	510.85 ± 89.07	436.72 ± 62.06	0.000976	0.0208	cg13979887	59.46 ± 15.34	55.27 ± 14.92	0.0103
ERMP1	510.85 ± 89.07	436.72 ± 62.06	0.000976	0.0208	cg13595913	83.94 ± 1.78	85.7 ± 2.1	0.0453
ERN1	171.76 ± 23.05	200.34 ± 41.1	0.000845	0.0195	cg16739096	94.95 ± 1.3	95.55 ± 1.43	0.0212
ERN1	171.76 ± 23.05	200.34 ± 41.1	0.000845	0.0195	cg17463083	77.95 ± 11.63	74.73 ± 13.67	0.0488
ERP44	1377.38 ± 98.16	1627.11 ± 170.92	2.09e-05	0.00368	cg01241375	3.36 ± 0.41	2.73 ± 0.4	0.00694
ESCO2	24.98 ± 8.48	17.57 ± 7.56	0.000548	0.0154	cg22350926	5.88 ± 1.28	7.3 ± 1.65	0.0193
ESRP1	1009.47 ± 110.92	1255.02 ± 152.25	5.92e-05	0.00543	cg26545346	86.97 ± 1.79	88.36 ± 1.57	0.0225
ETF1	318.86 ± 19.98	352 ± 33.99	0.00051	0.0149	cg21141827	78.1 ± 5.32	81.03 ± 5.45	0.0222
ETV1	448.23 ± 193.56	630.47 ± 292.11	2.72e-05	0.00414	cg21463790	48.53 ± 9.35	53.72 ± 10.06	0.00935
ETV1	448.23 ± 193.56	630.47 ± 292.11	2.72e-05	0.00414	cg20909656	2.56 ± 0.46	2.19 ± 0.33	0.0482
ETV4	36.24 ± 5.5	43.44 ± 9.91	0.00177	0.029	cg24679082	5.76 ± 0.82	6.28 ± 0.54	0.0153
ETV4	36.24 ± 5.5	43.44 ± 9.91	0.00177	0.029	cg04284535	25.98 ± 4.49	28.96 ± 6.49	0.0164
ETV4	36.24 ± 5.5	43.44 ± 9.91	0.00177	0.029	cg12003483	7.88 ± 1.35	8.67 ± 1.73	0.028
ETV4	36.24 ± 5.5	43.44 ± 9.91	0.00177	0.029	cg16400150	2.99 ± 0.9	2.52 ± 0.42	0.0284
ETV4	36.24 ± 5.5	43.44 ± 9.91	0.00177	0.029	cg01693090	6.14 ± 0.91	5.38 ± 0.66	0.029
ETV4	36.24 ± 5.5	43.44 ± 9.91	0.00177	0.029	cg11868356	51.03 ± 9.49	47.59 ± 11.84	0.0368
ETV5	131.53 ± 36.36	173.98 ± 41.08	0.00339	0.0415	cg16500173	6.67 ± 0.62	5.81 ± 0.57	0.000537
ETV5	131.53 ± 36.36	173.98 ± 41.08	0.00339	0.0415	cg16655375	3.43 ± 0.39	4.07 ± 0.58	0.000851
ETV5	131.53 ± 36.36	173.98 ± 41.08	0.00339	0.0415	cg21951070	11.29 ± 1.15	10.56 ± 1.53	0.0044
ETV5	131.53 ± 36.36	173.98 ± 41.08	0.00339	0.0415	cg07803284	78.95 ± 3.05	81.84 ± 3.78	0.0145
EXO1	38.05 ± 10.69	27.67 ± 7.6	0.000325	0.012	cg15084467	8.06 ± 1.56	9.24 ± 1.86	0.000353
EXO1	38.05 ± 10.69	27.67 ± 7.6	0.000325	0.012	cg24741598	10.69 ± 1.05	11.6 ± 1.13	0.0118
EXO1	38.05 ± 10.69	27.67 ± 7.6	0.000325	0.012	cg17423498	4.11 ± 0.39	3.62 ± 0.43	0.0126
EXOSC1	421.14 ± 32.45	488.1 ± 48.91	0.00105	0.0217	cg09881021	3.94 ± 0.34	4.56 ± 0.5	0.00551
EXOSC1	421.14 ± 32.45	488.1 ± 48.91	0.00105	0.0217	cg00537477	5.41 ± 1.4	4.7 ± 0.65	0.0292
EXOSC8	252.6 ± 31.23	294.37 ± 27.95	0.000304	0.0115	cg12715979	3.4 ± 0.79	2.72 ± 0.37	0.00361
EXT1	458.43 ± 106.75	405.08 ± 105.95	0.00103	0.0216	cg23089436	52.02 ± 3.73	55.1 ± 1.66	0.0022
EXT1	458.43 ± 106.75	405.08 ± 105.95	0.00103	0.0216	cg23298114	62.69 ± 5.63	66.3 ± 5.86	0.00379
EXT1	458.43 ± 106.75	405.08 ± 105.95	0.00103	0.0216	cg22747380	47.02 ± 17.7	55.08 ± 17.57	0.00695
EXT1	458.43 ± 106.75	405.08 ± 105.95	0.00103	0.0216	cg25956295	96.41 ± 0.84	97 ± 0.65	0.0199
EXT1	458.43 ± 106.75	405.08 ± 105.95	0.00103	0.0216	cg00127070	89.41 ± 2.45	86.97 ± 3.12	0.0228
EXT1	458.43 ± 106.75	405.08 ± 105.95	0.00103	0.0216	cg06401909	98.08 ± 0.48	97.65 ± 0.66	0.0294
EXT1	458.43 ± 106.75	405.08 ± 105.95	0.00103	0.0216	cg16286281	83.57 ± 10.01	79.69 ± 11.75	0.0387
EXT1	458.43 ± 106.75	405.08 ± 105.95	0.00103	0.0216	cg15978494	95.62 ± 1.05	96.48 ± 0.99	0.0419
EXT1	458.43 ± 106.75	405.08 ± 105.95	0.00103	0.0216	cg04395788	81.26 ± 8.45	78.75 ± 9.51	0.0421
F2R	194.12 ± 101.56	153.92 ± 86.71	0.000264	0.0107	cg19735421	52.53 ± 6.04	56.28 ± 5.83	0.000826
FADS1	396.86 ± 102.4	578.72 ± 160.08	2.14e-05	0.00368	cg25401284	2.57 ± 0.42	1.95 ± 0.46	0.0113
FADS1	396.86 ± 102.4	578.72 ± 160.08	2.14e-05	0.00368	cg09462826	7.32 ± 1.16	7.9 ± 1.09	0.0313
FADS1	396.86 ± 102.4	578.72 ± 160.08	2.14e-05	0.00368	cg16213375	14.25 ± 2.86	15.65 ± 3	0.0425
FADS2	578.53 ± 194.63	771.37 ± 253.8	2.43e-05	0.00392	cg01400685	49.9 ± 10.39	55.44 ± 10.59	0.00102
FADS2	578.53 ± 194.63	771.37 ± 253.8	2.43e-05	0.00392	cg25324164	36.11 ± 8.23	39.5 ± 8.34	0.013
FADS2	578.53 ± 194.63	771.37 ± 253.8	2.43e-05	0.00392	cg19610905	6.12 ± 0.88	7.08 ± 1.18	0.0279
FAF1	309.48 ± 22.92	326.05 ± 21.04	0.00336	0.0413	cg10511332	91.36 ± 2.68	93.36 ± 3.54	0.0162
FAF1	309.48 ± 22.92	326.05 ± 21.04	0.00336	0.0413	cg10237542	77.86 ± 11.01	82.4 ± 8.19	0.0467
FAM114A2	211.88 ± 34.64	246.05 ± 35.69	0.00157	0.0273	cg26062048	2.76 ± 0.44	3.06 ± 0.41	0.0313
FAM114A2	211.88 ± 34.64	246.05 ± 35.69	0.00157	0.0273	cg06508582	4.27 ± 0.59	4.63 ± 0.61	0.0417
FAM119B	71.66 ± 12.28	82.44 ± 21.11	0.00204	0.0313	cg04819539	91.42 ± 1.91	92.82 ± 1.73	0.0253
FAM158A	88.78 ± 9.46	105.03 ± 11.24	5.8e-05	0.00539	cg23058863	2.75 ± 0.5	2.34 ± 0.27	0.0254
FAM159B	258.94 ± 162.81	186.49 ± 106.97	0.00347	0.0419	cg18909711	90.17 ± 2.71	91.31 ± 2.41	0.0425
FAM163A	39.54 ± 7.44	52.05 ± 14.96	0.00298	0.0385	cg20318608	3.39 ± 0.51	3.96 ± 0.67	0.0236
FAM163A	39.54 ± 7.44	52.05 ± 14.96	0.00298	0.0385	cg02836963	93.08 ± 1.97	92.37 ± 2.7	0.0246
FAM163A	39.54 ± 7.44	52.05 ± 14.96	0.00298	0.0385	cg05421688	6.73 ± 2.44	5.87 ± 2.06	0.0324
FAM167A	80.51 ± 22.68	90.29 ± 19.86	0.000559	0.0155	cg26274995	50.52 ± 6.36	54.85 ± 7.17	0.00146
FAM167A	80.51 ± 22.68	90.29 ± 19.86	0.000559	0.0155	cg01383082	21.21 ± 7.85	24.57 ± 7.93	0.00329
FAM167A	80.51 ± 22.68	90.29 ± 19.86	0.000559	0.0155	cg08224773	72.57 ± 9.58	77.81 ± 7.74	0.00333
FAM167A	80.51 ± 22.68	90.29 ± 19.86	0.000559	0.0155	cg02771117	56.45 ± 14.4	61.73 ± 14.74	0.00834
FAM167A	80.51 ± 22.68	90.29 ± 19.86	0.000559	0.0155	cg16103604	33.08 ± 14.94	38.78 ± 16.08	0.00975
FAM167A	80.51 ± 22.68	90.29 ± 19.86	0.000559	0.0155	cg10220992	3.02 ± 0.83	3.52 ± 0.74	0.0216
FAM24B	59.07 ± 10.52	66.75 ± 9.97	0.000768	0.0185	cg02936953	68.51 ± 3.14	70.82 ± 3.46	0.00653
FAM24B	59.07 ± 10.52	66.75 ± 9.97	0.000768	0.0185	cg03283421	75.87 ± 17.29	71.48 ± 18.06	0.0156
FAM24B	59.07 ± 10.52	66.75 ± 9.97	0.000768	0.0185	cg11216554	18.81 ± 5.08	20.52 ± 6.27	0.0158
FAM38B	41.16 ± 18.68	29.34 ± 7.8	0.00171	0.0287	cg13429270	68.14 ± 3.47	70.35 ± 3	0.00825
FAM38B	41.16 ± 18.68	29.34 ± 7.8	0.00171	0.0287	cg14570051	85.99 ± 3.85	87.96 ± 2.59	0.0403
FAM43A	103.77 ± 12.45	95.49 ± 18.06	0.00421	0.0468	cg21106136	70.01 ± 4.97	77.93 ± 6.03	0.00012
FAM43A	103.77 ± 12.45	95.49 ± 18.06	0.00421	0.0468	cg10623840	18.93 ± 4.74	16.92 ± 5.05	0.036
FAM43A	103.77 ± 12.45	95.49 ± 18.06	0.00421	0.0468	cg25153601	2.39 ± 0.31	2.74 ± 0.49	0.0441
FAM71D	12.51 ± 0.52	13.85 ± 1.33	0.00158	0.0274	cg19566774	46.01 ± 3.74	48.85 ± 3.52	0.00252
FAM71D	12.51 ± 0.52	13.85 ± 1.33	0.00158	0.0274	cg16689937	60.52 ± 3.8	63.14 ± 4.16	0.022
FAM96B	801.54 ± 77.05	922.5 ± 64.58	0.00238	0.0339	cg03163767	18.44 ± 4.25	16.98 ± 4.93	0.00645
FANCI	98.29 ± 16.25	81.1 ± 17.63	0.00045	0.014	cg18831671	94.94 ± 0.62	95.55 ± 0.84	0.0438
FARP1	263.06 ± 50.13	232.54 ± 47.13	0.00114	0.0229	cg00821604	86.47 ± 3.07	89.23 ± 2.47	0.000338
FARP1	263.06 ± 50.13	232.54 ± 47.13	0.00114	0.0229	cg27240020	4.26 ± 0.75	3.56 ± 0.46	0.000799
FARP1	263.06 ± 50.13	232.54 ± 47.13	0.00114	0.0229	cg01941219	10.68 ± 1.29	9.06 ± 1.1	0.00255
FARP1	263.06 ± 50.13	232.54 ± 47.13	0.00114	0.0229	cg03282408	80.9 ± 2.27	83.03 ± 2.46	0.00343
FARP1	263.06 ± 50.13	232.54 ± 47.13	0.00114	0.0229	cg11829616	59.67 ± 9.54	63.93 ± 8.75	0.00647
FARP1	263.06 ± 50.13	232.54 ± 47.13	0.00114	0.0229	cg20001219	70.77 ± 7.65	73.09 ± 6.16	0.00794
FARP1	263.06 ± 50.13	232.54 ± 47.13	0.00114	0.0229	cg21126338	85.11 ± 2.57	86.98 ± 1.97	0.0107
FARP1	263.06 ± 50.13	232.54 ± 47.13	0.00114	0.0229	cg20653375	50.67 ± 8.1	55.87 ± 8.19	0.0109
FARP1	263.06 ± 50.13	232.54 ± 47.13	0.00114	0.0229	cg10986104	81.68 ± 5.89	85.92 ± 3.63	0.0115
FARP1	263.06 ± 50.13	232.54 ± 47.13	0.00114	0.0229	cg16689193	85.94 ± 2.73	89.06 ± 2.73	0.0117
FARP1	263.06 ± 50.13	232.54 ± 47.13	0.00114	0.0229	cg02183491	47.57 ± 9	51.38 ± 10.76	0.0135
FARP1	263.06 ± 50.13	232.54 ± 47.13	0.00114	0.0229	cg04213384	54.15 ± 16.52	47.98 ± 14.74	0.016
FARP1	263.06 ± 50.13	232.54 ± 47.13	0.00114	0.0229	cg12309938	94.41 ± 1.09	95.36 ± 0.99	0.0166
FARP1	263.06 ± 50.13	232.54 ± 47.13	0.00114	0.0229	cg03673225	94.02 ± 1.31	94.91 ± 1.02	0.0216
FARP1	263.06 ± 50.13	232.54 ± 47.13	0.00114	0.0229	cg01259362	73.06 ± 10.4	76.23 ± 10.02	0.0232
FARP1	263.06 ± 50.13	232.54 ± 47.13	0.00114	0.0229	cg16867086	68.49 ± 5	66.2 ± 4.95	0.0259
FARP1	263.06 ± 50.13	232.54 ± 47.13	0.00114	0.0229	cg11733266	86.27 ± 2.12	88.11 ± 1.7	0.0281
FARP1	263.06 ± 50.13	232.54 ± 47.13	0.00114	0.0229	cg05194316	80.39 ± 5.2	83.19 ± 4.95	0.0326
FARP1	263.06 ± 50.13	232.54 ± 47.13	0.00114	0.0229	cg06541780	89.5 ± 1.41	90.43 ± 0.89	0.0331
FARP1	263.06 ± 50.13	232.54 ± 47.13	0.00114	0.0229	cg17548932	62.32 ± 5.32	65.78 ± 4.89	0.0369
FARP1	263.06 ± 50.13	232.54 ± 47.13	0.00114	0.0229	cg15017828	75.46 ± 3.86	78.72 ± 3.41	0.0372
FARP1	263.06 ± 50.13	232.54 ± 47.13	0.00114	0.0229	cg19470290	88.44 ± 4.41	90.14 ± 2.5	0.0415
FARP1	263.06 ± 50.13	232.54 ± 47.13	0.00114	0.0229	cg25448281	59.95 ± 10.54	64.63 ± 10.64	0.0442
FARP1	263.06 ± 50.13	232.54 ± 47.13	0.00114	0.0229	cg00071727	82.27 ± 4.69	83.98 ± 5.35	0.0465
FARP2	196.7 ± 21.58	169.78 ± 19.48	9.24e-05	0.00645	cg16844818	89.13 ± 1.76	90.53 ± 2.11	0.0153
FBN1	129.96 ± 66.33	105.06 ± 55.15	0.0023	0.0333	cg04808130	88.24 ± 2.6	89.76 ± 2.47	0.0169
FBN1	129.96 ± 66.33	105.06 ± 55.15	0.0023	0.0333	cg22110213	84.34 ± 6.77	87.02 ± 6.37	0.0184
FBP1	315.59 ± 111.89	245.24 ± 91.02	0.00456	0.0491	cg21178568	91.47 ± 7.38	90.18 ± 7.19	0.0458
FBXO15	28.62 ± 3.26	25.36 ± 4	0.0012	0.0235	cg20645941	2.18 ± 0.52	2.66 ± 0.5	0.0206
FBXO15	28.62 ± 3.26	25.36 ± 4	0.0012	0.0235	cg19578388	3.51 ± 0.52	3.03 ± 0.43	0.0334
FBXO15	28.62 ± 3.26	25.36 ± 4	0.0012	0.0235	cg14761252	3.54 ± 0.63	4 ± 0.55	0.0404
FBXO16	123.63 ± 28.87	179.86 ± 47.71	2.12e-05	0.00368	cg12474312	3.51 ± 0.94	4.37 ± 0.87	0.0197
FBXO16	123.63 ± 28.87	179.86 ± 47.71	2.12e-05	0.00368	cg00815583	2.89 ± 0.44	3.38 ± 0.69	0.0434
FDPS	447.31 ± 69.01	507.82 ± 85.25	0.00284	0.0374	cg25762744	4.28 ± 0.42	3.71 ± 0.51	0.00698
FDPS	447.31 ± 69.01	507.82 ± 85.25	0.00284	0.0374	cg24547565	48.9 ± 3.63	50.62 ± 3.33	0.0156
FDPS	447.31 ± 69.01	507.82 ± 85.25	0.00284	0.0374	cg08847296	4.1 ± 0.47	4.53 ± 0.68	0.0343
FDPS	447.31 ± 69.01	507.82 ± 85.25	0.00284	0.0374	cg09579413	78 ± 3.68	79.36 ± 4.2	0.0472
FGF14	176.58 ± 78.64	211.38 ± 84.51	0.00146	0.0262	cg05505763	84.25 ± 1.86	86.75 ± 1.44	0.00588
FGF14	176.58 ± 78.64	211.38 ± 84.51	0.00146	0.0262	cg10395772	14.65 ± 1.89	17.07 ± 3	0.00894
FGF14	176.58 ± 78.64	211.38 ± 84.51	0.00146	0.0262	cg10565760	87.32 ± 4.81	89.77 ± 4.08	0.0107
FGF14	176.58 ± 78.64	211.38 ± 84.51	0.00146	0.0262	cg08958618	65.9 ± 10.87	69.88 ± 9.34	0.0207
FGF14	176.58 ± 78.64	211.38 ± 84.51	0.00146	0.0262	cg24877509	60.9 ± 9.07	64.89 ± 8.93	0.0227
FGL2	108.9 ± 50.92	66.56 ± 27.77	0.000184	0.00905	cg14752838	10.95 ± 1.22	9.79 ± 1.51	0.0274
FGL2	108.9 ± 50.92	66.56 ± 27.77	0.000184	0.00905	cg01310473	14.02 ± 3.04	15.87 ± 3.74	0.0388
FHL2	152.15 ± 36.72	128.92 ± 34.14	0.00151	0.0267	cg19850931	51 ± 10.06	57.02 ± 9.7	0.000402
FHL2	152.15 ± 36.72	128.92 ± 34.14	0.00151	0.0267	cg10635061	22.14 ± 4.46	20.02 ± 4.24	0.00335
FHL2	152.15 ± 36.72	128.92 ± 34.14	0.00151	0.0267	cg22454769	24.83 ± 7.85	27.63 ± 9.17	0.0138
FHL2	152.15 ± 36.72	128.92 ± 34.14	0.00151	0.0267	cg06320277	41.32 ± 3.3	43.2 ± 4.06	0.0485
FHL2	152.15 ± 36.72	128.92 ± 34.14	0.00151	0.0267	cg23367358	85.09 ± 4.43	82.08 ± 5.39	0.0493
FICD	230.47 ± 63.33	344.06 ± 91.03	5.8e-05	0.00539	cg26806188	5.3 ± 0.88	4.56 ± 0.74	0.00371
FICD	230.47 ± 63.33	344.06 ± 91.03	5.8e-05	0.00539	cg14079893	5.99 ± 0.75	5.07 ± 0.86	0.0217
FKBP14	357.23 ± 87.27	430.1 ± 118.13	0.0032	0.0402	cg16743785	3.08 ± 0.51	2.64 ± 0.35	0.00107
FKBP14	357.23 ± 87.27	430.1 ± 118.13	0.0032	0.0402	cg02350474	5.83 ± 0.61	6.24 ± 0.8	0.0246
FKBP14	357.23 ± 87.27	430.1 ± 118.13	0.0032	0.0402	cg11802692	6.28 ± 0.77	5.67 ± 0.83	0.028
FLII	401.32 ± 57.27	466.67 ± 75.88	0.000173	0.00867	cg17055950	11.71 ± 1.24	10.33 ± 1.38	0.00278
FLII	401.32 ± 57.27	466.67 ± 75.88	0.000173	0.00867	cg26771272	90.82 ± 5.46	88.11 ± 6.52	0.0178
FLII	401.32 ± 57.27	466.67 ± 75.88	0.000173	0.00867	cg09922349	80.47 ± 3.73	83.19 ± 3.67	0.0204
FLJ32065	195.04 ± 65.36	243.61 ± 79.22	0.000218	0.00981	cg20591695	86.49 ± 2.24	88.33 ± 3.63	0.00699
FLRT2	435.87 ± 193.13	336.29 ± 157.88	0.00169	0.0286	cg25120290	7.46 ± 1.22	6.28 ± 1.33	0.0134
FLT1	103.76 ± 51.13	60.28 ± 32.17	0.000298	0.0114	cg00321115	53.84 ± 4.3	57.91 ± 2.79	0.0108
FLT1	103.76 ± 51.13	60.28 ± 32.17	0.000298	0.0114	cg19402236	68.28 ± 12.58	64.16 ± 12.27	0.0136
FLT1	103.76 ± 51.13	60.28 ± 32.17	0.000298	0.0114	cg02188358	10.77 ± 1.62	9.87 ± 1.55	0.0258
FLT1	103.76 ± 51.13	60.28 ± 32.17	0.000298	0.0114	cg19512693	72.09 ± 3.32	74.79 ± 2.18	0.0302
FLT1	103.76 ± 51.13	60.28 ± 32.17	0.000298	0.0114	cg13800491	23.76 ± 4.17	25.36 ± 5	0.0309
FMNL3	75.64 ± 15.62	66.43 ± 12.86	0.00201	0.0312	cg04070601	40.68 ± 4.62	44.03 ± 4.83	0.0122
FMNL3	75.64 ± 15.62	66.43 ± 12.86	0.00201	0.0312	cg15087401	10.16 ± 1.84	11.76 ± 2.46	0.0259
FMNL3	75.64 ± 15.62	66.43 ± 12.86	0.00201	0.0312	cg10474546	9.55 ± 0.65	10.65 ± 1.51	0.044
FMNL3	75.64 ± 15.62	66.43 ± 12.86	0.00201	0.0312	cg16797275	86.86 ± 6.71	91.29 ± 3.03	0.0483
FMO4	61.12 ± 12.09	49.02 ± 12.71	0.000501	0.0148	cg02129382	73.11 ± 5.63	77.67 ± 5.36	0.000403
FMO4	61.12 ± 12.09	49.02 ± 12.71	0.000501	0.0148	cg04402078	93.82 ± 1.13	94.67 ± 0.87	0.0198
FN1	1679.41 ± 750.78	1212.39 ± 616.78	1.36e-05	0.00302	cg25099021	88.06 ± 5.8	92.83 ± 4.02	0.0159
FN1	1679.41 ± 750.78	1212.39 ± 616.78	1.36e-05	0.00302	cg09335314	87.64 ± 6.3	89.59 ± 6.3	0.0271
FNDC3A	1149.06 ± 234.91	1331.49 ± 298.41	8.25e-05	0.00615	cg17300237	95.04 ± 1.05	96.05 ± 0.77	0.00538
FNDC3A	1149.06 ± 234.91	1331.49 ± 298.41	8.25e-05	0.00615	cg02043329	89.11 ± 1.96	90.69 ± 1.43	0.0353
FOS	453.37 ± 363.59	621.98 ± 322.91	0.000167	0.00855	cg18717355	3.44 ± 0.33	3.9 ± 0.5	0.00959
FOS	453.37 ± 363.59	621.98 ± 322.91	0.000167	0.00855	cg14102251	5.06 ± 0.73	4.54 ± 0.81	0.0147
FOS	453.37 ± 363.59	621.98 ± 322.91	0.000167	0.00855	cg25034766	95.15 ± 1.28	95.95 ± 1.24	0.0151
FOXJ1	60.96 ± 7.23	73.05 ± 10.28	0.000173	0.00867	cg25051233	62.34 ± 5.48	65.81 ± 6.1	0.00058
FOXJ1	60.96 ± 7.23	73.05 ± 10.28	0.000173	0.00867	cg09480647	38.98 ± 6.99	42.01 ± 7.34	0.00211
FOXJ1	60.96 ± 7.23	73.05 ± 10.28	0.000173	0.00867	cg06210215	60.76 ± 2.76	63.54 ± 4.12	0.00322
FOXJ1	60.96 ± 7.23	73.05 ± 10.28	0.000173	0.00867	cg16672637	54.16 ± 7.32	57.31 ± 8.17	0.0055
FOXJ1	60.96 ± 7.23	73.05 ± 10.28	0.000173	0.00867	cg14182461	91.78 ± 1.13	92.65 ± 0.87	0.0208
FPR3	69.67 ± 28.21	51.05 ± 18.59	0.00116	0.023	cg06784466	40.65 ± 4.51	42.97 ± 4.36	0.0211
FRAS1	58.93 ± 13.77	48.54 ± 12.58	0.00054	0.0154	cg20327820	1.55 ± 0.27	2.17 ± 0.4	0.00344
FRAS1	58.93 ± 13.77	48.54 ± 12.58	0.00054	0.0154	cg17512802	84.8 ± 2.87	86.97 ± 2.68	0.0189
FRAS1	58.93 ± 13.77	48.54 ± 12.58	0.00054	0.0154	cg18929663	89.51 ± 1.83	91.62 ± 1.5	0.0198
FRAS1	58.93 ± 13.77	48.54 ± 12.58	0.00054	0.0154	cg12573119	29.37 ± 1.58	28.08 ± 1.41	0.0313
FRAS1	58.93 ± 13.77	48.54 ± 12.58	0.00054	0.0154	cg16678047	84.03 ± 2.38	85.58 ± 2.11	0.0316
FRAS1	58.93 ± 13.77	48.54 ± 12.58	0.00054	0.0154	cg11073571	3.56 ± 0.47	3.13 ± 0.67	0.0326
FRAS1	58.93 ± 13.77	48.54 ± 12.58	0.00054	0.0154	cg04091555	85.47 ± 5.33	87.94 ± 5.29	0.0351
FRAS1	58.93 ± 13.77	48.54 ± 12.58	0.00054	0.0154	cg21336594	66.12 ± 16.69	61.25 ± 18.66	0.0363
FRAS1	58.93 ± 13.77	48.54 ± 12.58	0.00054	0.0154	cg09726866	46.51 ± 12.45	52.43 ± 12.95	0.0374
FRAS1	58.93 ± 13.77	48.54 ± 12.58	0.00054	0.0154	cg02467765	4.78 ± 0.39	4.41 ± 0.27	0.0399
FREM2	56.78 ± 18.24	38.89 ± 12.42	6.78e-05	0.00561	cg11155374	92.16 ± 1.51	93.37 ± 2.09	0.0411
FRMD6	163.49 ± 64.16	130.43 ± 49.78	0.000549	0.0154	cg07431973	51.9 ± 4.37	55.62 ± 4.93	0.00656
FRMD6	163.49 ± 64.16	130.43 ± 49.78	0.000549	0.0154	cg14469749	89.09 ± 3.12	90.91 ± 2.62	0.00784
FRMD6	163.49 ± 64.16	130.43 ± 49.78	0.000549	0.0154	cg20256059	86.32 ± 2.32	88.19 ± 2.71	0.0425
FRMPD1	48.39 ± 30.99	86.23 ± 86.54	0.00271	0.0363	cg21201357	78.4 ± 3.35	80.22 ± 2.96	0.0122
FRMPD1	48.39 ± 30.99	86.23 ± 86.54	0.00271	0.0363	cg14204124	7.17 ± 1.19	7.94 ± 1.12	0.0135
FRMPD1	48.39 ± 30.99	86.23 ± 86.54	0.00271	0.0363	cg17228093	18.86 ± 5.73	23.05 ± 7.08	0.0168
FRMPD1	48.39 ± 30.99	86.23 ± 86.54	0.00271	0.0363	cg16235034	5.57 ± 1.07	5 ± 0.88	0.0424
FSTL1	1010.25 ± 276.09	819.57 ± 266.29	0.00024	0.0102	cg08840687	95.69 ± 0.88	96.38 ± 0.77	0.0372
FTL	4663.46 ± 322.27	4966.36 ± 280.4	0.000454	0.0141	cg22027879	94.2 ± 1.73	93.03 ± 2.25	0.0222
FTL	4663.46 ± 322.27	4966.36 ± 280.4	0.000454	0.0141	cg26532042	8.68 ± 1.42	7.62 ± 1	0.0445
FTSJ1	170.89 ± 15.04	206.73 ± 31.85	0.000875	0.0199	cg06489418	18.73 ± 21.46	19.37 ± 21.51	0.0418
FTSJ2	280.67 ± 19.09	260.81 ± 22.83	0.00167	0.0284	cg11066209	24.57 ± 2.81	26.69 ± 2.31	0.0111
FTSJ2	280.67 ± 19.09	260.81 ± 22.83	0.00167	0.0284	cg02172222	95.47 ± 0.4	96.1 ± 0.72	0.0323
FUCA2	820.77 ± 120.78	936.4 ± 162.51	0.000167	0.00855	cg18419694	5.49 ± 0.95	4.73 ± 1.39	0.00877
FUCA2	820.77 ± 120.78	936.4 ± 162.51	0.000167	0.00855	cg21468889	96.12 ± 0.69	96.7 ± 0.58	0.0117
FUCA2	820.77 ± 120.78	936.4 ± 162.51	0.000167	0.00855	cg21090806	91.31 ± 1.52	92.66 ± 1.33	0.0241
FUCA2	820.77 ± 120.78	936.4 ± 162.51	0.000167	0.00855	cg00480749	2.6 ± 0.36	2.27 ± 0.38	0.034
FUT8	206.68 ± 28.07	183.7 ± 32.65	0.00151	0.0266	cg23473374	84.53 ± 5.48	89.46 ± 4.69	0.00298
FUT8	206.68 ± 28.07	183.7 ± 32.65	0.00151	0.0266	cg01963061	5.61 ± 0.6	4.93 ± 0.85	0.0105
FUT8	206.68 ± 28.07	183.7 ± 32.65	0.00151	0.0266	cg19780829	98.11 ± 0.5	98.54 ± 0.43	0.0147
FXYD2	723.3 ± 184.02	618.16 ± 215.19	0.00434	0.0475	cg10997248	60.26 ± 7.41	63.7 ± 5.97	0.0231
FXYD3	426.46 ± 97.49	333.45 ± 82.86	0.00241	0.0342	cg08823209	32.15 ± 11.1	36.76 ± 11.62	0.00625
FYTTD1	684.98 ± 58.45	739.06 ± 71.63	0.00335	0.0413	cg11228005	8.81 ± 1.01	7.74 ± 1.27	0.0117
FYTTD1	684.98 ± 58.45	739.06 ± 71.63	0.00335	0.0413	cg08268125	2.43 ± 0.38	2.77 ± 0.41	0.0228
G0S2	426.6 ± 370.52	542.87 ± 536.66	0.00204	0.0313	cg27176828	4.81 ± 0.6	4.34 ± 0.76	0.0242
G0S2	426.6 ± 370.52	542.87 ± 536.66	0.00204	0.0313	cg13460643	3.1 ± 0.78	2.77 ± 0.69	0.0463
G3BP1	1968.86 ± 220.38	1718.97 ± 177.39	0.00337	0.0414	cg26361928	3.02 ± 0.47	2.68 ± 0.34	0.00987
G3BP1	1968.86 ± 220.38	1718.97 ± 177.39	0.00337	0.0414	cg19516279	6.08 ± 1.38	7.88 ± 2.87	0.0196
G6PC2	4063.89 ± 2125.55	3493.38 ± 1827.26	0.000848	0.0195	cg07338205	47.89 ± 14.66	53.81 ± 15.85	0.027
GALC	378.56 ± 53.73	336.94 ± 51.19	0.00117	0.0232	cg14084312	4.29 ± 0.38	3.77 ± 0.45	0.00643
GALC	378.56 ± 53.73	336.94 ± 51.19	0.00117	0.0232	cg05601096	85.53 ± 6.01	87.64 ± 6.06	0.0245
GALK2	356.31 ± 45.78	402.08 ± 48.24	0.00129	0.0244	cg07351637	59.35 ± 12.71	68.18 ± 12.68	0.000481
GALK2	356.31 ± 45.78	402.08 ± 48.24	0.00129	0.0244	cg11804248	5.56 ± 1.23	4.34 ± 1.65	0.00878
GALK2	356.31 ± 45.78	402.08 ± 48.24	0.00129	0.0244	cg08036668	34.37 ± 3.22	36.73 ± 3.3	0.0108
GALK2	356.31 ± 45.78	402.08 ± 48.24	0.00129	0.0244	cg00756450	64.65 ± 5.79	69.2 ± 1.41	0.0116
GALK2	356.31 ± 45.78	402.08 ± 48.24	0.00129	0.0244	cg18736186	26.88 ± 3.27	28.66 ± 3.67	0.0152
GALK2	356.31 ± 45.78	402.08 ± 48.24	0.00129	0.0244	cg03382226	95.19 ± 1.14	96.17 ± 1	0.0156
GALK2	356.31 ± 45.78	402.08 ± 48.24	0.00129	0.0244	cg23000765	3.1 ± 0.34	2.82 ± 0.31	0.0193
GALK2	356.31 ± 45.78	402.08 ± 48.24	0.00129	0.0244	cg12290394	2.76 ± 0.4	3.32 ± 0.71	0.0246
GALK2	356.31 ± 45.78	402.08 ± 48.24	0.00129	0.0244	cg06104007	4.26 ± 1.1	3.87 ± 1.03	0.0392
GALK2	356.31 ± 45.78	402.08 ± 48.24	0.00129	0.0244	cg10156207	97.38 ± 0.83	97.96 ± 0.6	0.0457
GALM	145.88 ± 37.1	115.31 ± 31.21	0.00084	0.0194	cg01547915	82.07 ± 10.02	78.71 ± 9.62	0.00853
GALM	145.88 ± 37.1	115.31 ± 31.21	0.00084	0.0194	cg00359181	6.74 ± 1.02	5.95 ± 1.45	0.031
GALNT11	355.59 ± 42.74	308.94 ± 44.56	0.000932	0.0205	cg13789443	34.76 ± 3.43	37.04 ± 4.59	0.0196
GALNT11	355.59 ± 42.74	308.94 ± 44.56	0.000932	0.0205	cg19699648	86.82 ± 2.18	88.09 ± 2.37	0.0331
GALNT2	685.47 ± 237.55	616.04 ± 196.01	0.00408	0.0461	cg26893605	60.52 ± 5.96	65.49 ± 6.11	0.000193
GALNT2	685.47 ± 237.55	616.04 ± 196.01	0.00408	0.0461	cg23843953	82.92 ± 5.68	85.72 ± 4.92	0.000879
GALNT2	685.47 ± 237.55	616.04 ± 196.01	0.00408	0.0461	cg20594765	36.1 ± 11.83	42.02 ± 13.33	0.00164
GALNT2	685.47 ± 237.55	616.04 ± 196.01	0.00408	0.0461	cg07231053	46.89 ± 5.58	50.44 ± 5.17	0.00286
GALNT2	685.47 ± 237.55	616.04 ± 196.01	0.00408	0.0461	cg04304509	58.56 ± 7.25	60.54 ± 6.56	0.033
GALNT4	327.23 ± 105.5	234.92 ± 63.65	0.000156	0.00832	cg03345628	2.29 ± 0.32	1.94 ± 0.42	0.0195
GALNT4	327.23 ± 105.5	234.92 ± 63.65	0.000156	0.00832	cg09743140	3.95 ± 0.55	3.45 ± 0.36	0.0269
GALNT7	515.91 ± 116.39	434.88 ± 112.72	0.0039	0.0448	cg18282392	96.23 ± 0.98	97.13 ± 0.55	0.002
GALNT7	515.91 ± 116.39	434.88 ± 112.72	0.0039	0.0448	cg05897918	7.1 ± 1.23	8.4 ± 1.24	0.00523
GALNT7	515.91 ± 116.39	434.88 ± 112.72	0.0039	0.0448	cg03238899	92.88 ± 1.47	93.99 ± 0.8	0.0346
GAP43	190.43 ± 83.61	348.2 ± 144.66	9.75e-07	0.00162	cg05963821	4.74 ± 0.97	5.8 ± 1.24	0.000714
GAP43	190.43 ± 83.61	348.2 ± 144.66	9.75e-07	0.00162	cg09463650	52.12 ± 13.28	57.4 ± 14.34	0.0295
GAP43	190.43 ± 83.61	348.2 ± 144.66	9.75e-07	0.00162	cg26783404	88.11 ± 7.39	86.2 ± 7.98	0.03
GARS	1335.39 ± 81.4	1640.87 ± 164.72	8.81e-05	0.00637	cg13917964	4.05 ± 0.7	4.86 ± 0.65	0.000652
GARS	1335.39 ± 81.4	1640.87 ± 164.72	8.81e-05	0.00637	cg09021643	2.52 ± 0.43	3.08 ± 0.48	0.0025
GARS	1335.39 ± 81.4	1640.87 ± 164.72	8.81e-05	0.00637	cg21429551	11.52 ± 2.48	14.22 ± 3.07	0.00295
GARS	1335.39 ± 81.4	1640.87 ± 164.72	8.81e-05	0.00637	cg16875104	8.54 ± 2.58	10.73 ± 3.97	0.0111
GARS	1335.39 ± 81.4	1640.87 ± 164.72	8.81e-05	0.00637	cg20960443	5.95 ± 0.81	6.96 ± 0.97	0.0112
GARS	1335.39 ± 81.4	1640.87 ± 164.72	8.81e-05	0.00637	cg07186765	9.31 ± 3.95	11.79 ± 5.04	0.0194
GARS	1335.39 ± 81.4	1640.87 ± 164.72	8.81e-05	0.00637	cg19390658	25.14 ± 5.06	27.79 ± 4.06	0.0214
GAS2	226.41 ± 88.16	289.61 ± 132.04	0.000535	0.0154	cg02026246	45.17 ± 9.12	51.35 ± 10.82	0.0108
GAS2	226.41 ± 88.16	289.61 ± 132.04	0.000535	0.0154	cg03547797	26.06 ± 5.04	29.76 ± 6.82	0.019
GATAD2B	242.02 ± 17.18	219.94 ± 24.93	0.00411	0.0462	cg20773694	4.29 ± 0.57	3.84 ± 0.3	0.0041
GATAD2B	242.02 ± 17.18	219.94 ± 24.93	0.00411	0.0462	cg08202226	89.1 ± 3.97	87.2 ± 4.91	0.0211
GATAD2B	242.02 ± 17.18	219.94 ± 24.93	0.00411	0.0462	cg04137323	47 ± 9.31	52.42 ± 9.43	0.0286
GATAD2B	242.02 ± 17.18	219.94 ± 24.93	0.00411	0.0462	cg16148871	3.94 ± 0.62	3.35 ± 0.72	0.0487
GATM	1605.05 ± 647.14	1234.7 ± 570.58	0.00408	0.046	cg18435832	13.12 ± 3.36	11.05 ± 3.83	0.00782
GATM	1605.05 ± 647.14	1234.7 ± 570.58	0.00408	0.046	cg05280133	6.26 ± 1.5	5.54 ± 1.34	0.0157
GATM	1605.05 ± 647.14	1234.7 ± 570.58	0.00408	0.046	cg04980849	47.15 ± 11.62	42.19 ± 11.35	0.0373
GBA	404.43 ± 67.94	346.51 ± 79.68	0.00468	0.0498	cg17319849	1.96 ± 0.31	2.37 ± 0.4	0.00208
GBA	404.43 ± 67.94	346.51 ± 79.68	0.00468	0.0498	cg13919724	3.75 ± 0.47	4.43 ± 0.68	0.0216
GBA	404.43 ± 67.94	346.51 ± 79.68	0.00468	0.0498	cg15742751	7.09 ± 1.79	8.57 ± 1.48	0.0252
GBE1	576.79 ± 117.31	669.01 ± 180.83	0.00219	0.0322	cg22480949	4.19 ± 0.55	3.33 ± 0.66	0.00106
GBE1	576.79 ± 117.31	669.01 ± 180.83	0.00219	0.0322	cg21897315	58.56 ± 15.26	54.93 ± 16.11	0.0305
GBE1	576.79 ± 117.31	669.01 ± 180.83	0.00219	0.0322	cg07356753	15.49 ± 1.88	14.48 ± 1.33	0.041
GBE1	576.79 ± 117.31	669.01 ± 180.83	0.00219	0.0322	cg16472210	3.37 ± 0.52	3.12 ± 0.41	0.0443
GBGT1	60.41 ± 5.27	54.88 ± 4.92	0.00183	0.0296	cg09513259	44.33 ± 3.6	46.39 ± 3.45	0.00619
GBGT1	60.41 ± 5.27	54.88 ± 4.92	0.00183	0.0296	cg24340029	6.49 ± 0.74	6.07 ± 0.59	0.0289
GCH1	722.34 ± 248.23	1037.59 ± 331.19	1.3e-05	0.00296	cg26681354	9.22 ± 0.7	8.29 ± 0.76	0.00704
GCH1	722.34 ± 248.23	1037.59 ± 331.19	1.3e-05	0.00296	cg01899130	26.56 ± 14.34	32.38 ± 15.58	0.0118
GCH1	722.34 ± 248.23	1037.59 ± 331.19	1.3e-05	0.00296	cg00708486	49.29 ± 13.96	53.93 ± 16	0.038
GCKR	80.79 ± 32.24	101.38 ± 51.28	0.000696	0.0175	cg20229788	20.9 ± 8.66	27.05 ± 9.11	0.000496
GCNT3	887.83 ± 384.74	602.92 ± 228.47	0.000345	0.0123	cg27568885	92.76 ± 1.07	93.46 ± 1.12	0.0183
GCNT3	887.83 ± 384.74	602.92 ± 228.47	0.000345	0.0123	cg09407660	74.15 ± 3.88	76.53 ± 3.81	0.0278
GCNT3	887.83 ± 384.74	602.92 ± 228.47	0.000345	0.0123	cg01247856	88.61 ± 2.26	89.97 ± 2.58	0.0363
GCOM1	186.54 ± 78.02	144.33 ± 62.38	0.000805	0.0189	cg22175779	3.7 ± 0.57	4.73 ± 0.92	0.0157
GCOM1	186.54 ± 78.02	144.33 ± 62.38	0.000805	0.0189	cg02743050	3.27 ± 0.46	2.91 ± 0.61	0.0179
GCOM1	186.54 ± 78.02	144.33 ± 62.38	0.000805	0.0189	cg09898978	69.44 ± 6.7	71.65 ± 6.82	0.0291
GCOM1	186.54 ± 78.02	144.33 ± 62.38	0.000805	0.0189	cg18819978	3.63 ± 0.9	4.27 ± 0.63	0.0356
GCOM1	186.54 ± 78.02	144.33 ± 62.38	0.000805	0.0189	cg22184210	21.89 ± 3.92	19.65 ± 4.4	0.0454
GGA2	385.17 ± 69.19	445.06 ± 91.04	0.00361	0.0428	cg07135701	83.35 ± 5.53	86.65 ± 4.1	0.0417
GGH	157.82 ± 30.83	117.97 ± 31.19	2.78e-05	0.00414	cg02505296	3.4 ± 0.58	2.94 ± 0.45	0.0226
GGT1	248.46 ± 89.96	197.07 ± 61.29	0.000115	0.00736	cg02267795	3.82 ± 0.52	3.42 ± 0.58	0.0293
GGT1	248.46 ± 89.96	197.07 ± 61.29	0.000115	0.00736	cg09338412	49.39 ± 4.2	47.67 ± 4.18	0.0407
GIMAP2	27.31 ± 7.12	23.82 ± 4.84	0.00416	0.0466	cg25918245	15.79 ± 2.72	18.75 ± 3.79	0.00184
GIPC2	335.03 ± 135.01	276.1 ± 117.21	0.00272	0.0364	cg00347563	10.84 ± 2.26	9.01 ± 1.6	0.000211
GLI2	62.89 ± 9.81	55.61 ± 8.5	0.0039	0.0448	cg04399461	85.87 ± 6.36	89.72 ± 3.44	0.00438
GLI2	62.89 ± 9.81	55.61 ± 8.5	0.0039	0.0448	cg11398095	89.97 ± 1.59	91.69 ± 1.3	0.00638
GLI2	62.89 ± 9.81	55.61 ± 8.5	0.0039	0.0448	cg02632203	93.89 ± 1.26	94.83 ± 1.96	0.0066
GLI2	62.89 ± 9.81	55.61 ± 8.5	0.0039	0.0448	cg23087358	96.57 ± 1.05	97.4 ± 0.69	0.0102
GLI2	62.89 ± 9.81	55.61 ± 8.5	0.0039	0.0448	cg10255486	93.81 ± 1.34	94.74 ± 0.95	0.0193
GLI2	62.89 ± 9.81	55.61 ± 8.5	0.0039	0.0448	cg23996979	96.39 ± 0.65	96.92 ± 0.58	0.0302
GLI2	62.89 ± 9.81	55.61 ± 8.5	0.0039	0.0448	cg12562660	94.35 ± 1.22	95.17 ± 0.87	0.0315
GLI2	62.89 ± 9.81	55.61 ± 8.5	0.0039	0.0448	cg14773228	84.99 ± 7.86	81.76 ± 9.25	0.0338
GLI2	62.89 ± 9.81	55.61 ± 8.5	0.0039	0.0448	cg16248554	88.36 ± 2.65	89.75 ± 2.95	0.035
GLI2	62.89 ± 9.81	55.61 ± 8.5	0.0039	0.0448	cg21759953	86.22 ± 2.94	87.73 ± 3.92	0.0402
GLI2	62.89 ± 9.81	55.61 ± 8.5	0.0039	0.0448	cg14270760	56.43 ± 9.11	61.69 ± 7.17	0.0464
GLIPR1	213.6 ± 104.16	166.4 ± 76.65	0.00213	0.0319	cg24719912	93.25 ± 1.85	94.49 ± 2.4	0.0145
GLIPR1	213.6 ± 104.16	166.4 ± 76.65	0.00213	0.0319	cg01554451	75.84 ± 4.9	78.71 ± 3.48	0.0473
GLOD4	999.9 ± 110.29	914.55 ± 91.92	0.0019	0.0302	cg10318443	2.31 ± 0.38	1.82 ± 0.26	0.00188
GLOD4	999.9 ± 110.29	914.55 ± 91.92	0.0019	0.0302	cg09036952	90.63 ± 1.51	91.66 ± 1.24	0.022
GLOD4	999.9 ± 110.29	914.55 ± 91.92	0.0019	0.0302	cg14808521	2.01 ± 0.26	1.69 ± 0.34	0.0285
GLOD4	999.9 ± 110.29	914.55 ± 91.92	0.0019	0.0302	cg12256311	18.75 ± 1.67	17.47 ± 1.41	0.04
GLOD4	999.9 ± 110.29	914.55 ± 91.92	0.0019	0.0302	cg23919795	3.19 ± 0.31	2.82 ± 0.55	0.0407
GLRA1	261.77 ± 192.25	129.45 ± 67.43	1.28e-05	0.00294	cg11955641	11.86 ± 4.59	13.45 ± 4.14	0.0169
GLRA1	261.77 ± 192.25	129.45 ± 67.43	1.28e-05	0.00294	cg05422647	7.04 ± 2.19	8.08 ± 2.04	0.0332
GLRX3	594.47 ± 57.19	668.86 ± 77.81	0.000462	0.0142	cg08199273	16.56 ± 2.5	19.57 ± 4.71	0.0287
GLRX3	594.47 ± 57.19	668.86 ± 77.81	0.000462	0.0142	cg18986589	88.13 ± 2.49	90.11 ± 2.48	0.0289
GLRX3	594.47 ± 57.19	668.86 ± 77.81	0.000462	0.0142	cg27260462	6.05 ± 0.88	6.4 ± 0.88	0.0479
GLT8D1	629.41 ± 114.67	805.67 ± 185.72	3.52e-06	0.002	cg04351169	4 ± 0.63	3.36 ± 0.44	0.011
GLT8D1	629.41 ± 114.67	805.67 ± 185.72	3.52e-06	0.002	cg22078079	7.28 ± 0.77	6.65 ± 0.84	0.0447
GLUL	455.52 ± 68.93	407.93 ± 59.55	9.95e-06	0.00258	cg00984967	94.33 ± 0.79	95.19 ± 0.8	0.00366
GLUL	1645.15 ± 258.44	1475.87 ± 246.13	0.00123	0.0236	cg00984967	94.33 ± 0.79	95.19 ± 0.8	0.00366
GLUL	455.52 ± 68.93	407.93 ± 59.55	9.95e-06	0.00258	cg04017672	27.65 ± 8.08	24.53 ± 7.75	0.00693
GLUL	1645.15 ± 258.44	1475.87 ± 246.13	0.00123	0.0236	cg04017672	27.65 ± 8.08	24.53 ± 7.75	0.00693
GLUL	455.52 ± 68.93	407.93 ± 59.55	9.95e-06	0.00258	cg17892328	8.54 ± 1.45	7.44 ± 1.1	0.0172
GLUL	1645.15 ± 258.44	1475.87 ± 246.13	0.00123	0.0236	cg17892328	8.54 ± 1.45	7.44 ± 1.1	0.0172
GLUL	455.52 ± 68.93	407.93 ± 59.55	9.95e-06	0.00258	cg17283022	9.5 ± 2.71	8.61 ± 2.68	0.0228
GLUL	1645.15 ± 258.44	1475.87 ± 246.13	0.00123	0.0236	cg17283022	9.5 ± 2.71	8.61 ± 2.68	0.0228
GMPPA	253.31 ± 30.69	309.29 ± 44.93	0.000169	0.0086	cg25953789	75.64 ± 3.43	78.33 ± 2.63	0.022
GMPPA	253.31 ± 30.69	309.29 ± 44.93	0.000169	0.0086	cg09342325	83.25 ± 7.8	85.97 ± 5.52	0.0282
GMPPA	253.31 ± 30.69	309.29 ± 44.93	0.000169	0.0086	cg24745548	2.78 ± 0.76	3.42 ± 0.97	0.0352
GMPPB	168.36 ± 16.54	211.2 ± 36.06	0.000383	0.0129	cg04641912	2.89 ± 0.54	2.44 ± 0.35	0.0253
GMPPB	168.36 ± 16.54	211.2 ± 36.06	0.000383	0.0129	cg01626197	2.66 ± 0.56	2.27 ± 0.35	0.0398
GNA13	416.92 ± 36.36	481.35 ± 46.25	0.0019	0.0302	cg03182819	4.95 ± 0.63	4.41 ± 0.61	0.0381
GNG4	350.98 ± 132.51	438.58 ± 161.23	0.00211	0.0317	cg13455717	22.15 ± 5.12	25.69 ± 7	0.00799
GNG4	350.98 ± 132.51	438.58 ± 161.23	0.00211	0.0317	cg14011070	56.91 ± 3.73	60.91 ± 5.93	0.0125
GNG4	350.98 ± 132.51	438.58 ± 161.23	0.00211	0.0317	cg09649610	5.72 ± 1.64	6.83 ± 2.41	0.0162
GNG4	350.98 ± 132.51	438.58 ± 161.23	0.00211	0.0317	cg22941646	20.83 ± 7.45	23.51 ± 7.39	0.0201
GNG4	350.98 ± 132.51	438.58 ± 161.23	0.00211	0.0317	cg24454695	23.73 ± 8.1	25.81 ± 7.28	0.0208
GNG5	393.22 ± 86.63	426.67 ± 92.86	0.00429	0.0473	cg27037943	3.86 ± 0.42	3.44 ± 0.29	0.0169
GNG5	393.22 ± 86.63	426.67 ± 92.86	0.00429	0.0473	cg00020720	4.83 ± 0.57	5.2 ± 0.56	0.0173
GNG5	393.22 ± 86.63	426.67 ± 92.86	0.00429	0.0473	cg01000656	2.43 ± 0.28	2.17 ± 0.3	0.0296
GNGT1	4.08 ± 0.4	5.02 ± 0.88	0.000216	0.0098	cg20829211	69.67 ± 5	74.36 ± 4.19	0.0111
GNL3	757.27 ± 102.23	1033.79 ± 205.78	1.02e-05	0.00258	cg00845626	85.04 ± 2	87.58 ± 1.67	0.000185
GNL3	757.27 ± 102.23	1033.79 ± 205.78	1.02e-05	0.00258	cg12365107	1.87 ± 0.3	1.54 ± 0.24	0.00815
GNL3	757.27 ± 102.23	1033.79 ± 205.78	1.02e-05	0.00258	cg00150837	58.6 ± 4.2	61.71 ± 4.39	0.0253
GNPTG	418.4 ± 66.68	363.24 ± 54.21	6.03e-05	0.00545	cg16133244	63.59 ± 3.38	65.56 ± 2.66	0.0117
GNPTG	418.4 ± 66.68	363.24 ± 54.21	6.03e-05	0.00545	cg04826516	3.85 ± 0.72	3.16 ± 0.43	0.0152
GNPTG	418.4 ± 66.68	363.24 ± 54.21	6.03e-05	0.00545	cg00122851	87.93 ± 3.66	89.27 ± 4.21	0.0335
GOLGA2	413.93 ± 77.06	478.03 ± 90.65	0.00281	0.0372	cg25590938	7.42 ± 0.98	8.16 ± 0.93	0.0321
GOLGA3	291.92 ± 38.75	341.37 ± 44.3	0.00178	0.0292	cg23058246	86.25 ± 1.38	88.47 ± 1.91	0.000707
GOLGA3	291.92 ± 38.75	341.37 ± 44.3	0.00178	0.0292	cg21809054	64.79 ± 8.16	68.79 ± 6.91	0.00196
GOLGA3	291.92 ± 38.75	341.37 ± 44.3	0.00178	0.0292	cg15998961	94.64 ± 1.06	95.61 ± 0.92	0.00203
GOLGA3	291.92 ± 38.75	341.37 ± 44.3	0.00178	0.0292	cg04665647	90.61 ± 1.84	92.6 ± 1.41	0.00292
GOLGA3	291.92 ± 38.75	341.37 ± 44.3	0.00178	0.0292	cg22516162	93.37 ± 1.27	94.23 ± 0.84	0.0031
GOLGA3	291.92 ± 38.75	341.37 ± 44.3	0.00178	0.0292	cg23470262	92.97 ± 1.21	94.12 ± 1.22	0.0066
GOLGA3	291.92 ± 38.75	341.37 ± 44.3	0.00178	0.0292	cg20916319	66.74 ± 4.28	69.48 ± 3.87	0.00698
GOLGA3	291.92 ± 38.75	341.37 ± 44.3	0.00178	0.0292	cg03618215	93.92 ± 1.33	95.1 ± 0.71	0.00919
GOLGA3	291.92 ± 38.75	341.37 ± 44.3	0.00178	0.0292	cg15172381	23.42 ± 2.95	26.69 ± 2.93	0.0112
GOLGA3	291.92 ± 38.75	341.37 ± 44.3	0.00178	0.0292	cg20765580	87.22 ± 1.89	88.85 ± 1.95	0.0126
GOLGA3	291.92 ± 38.75	341.37 ± 44.3	0.00178	0.0292	cg05237360	90.33 ± 2.43	92.03 ± 2	0.0137
GOLGA3	291.92 ± 38.75	341.37 ± 44.3	0.00178	0.0292	cg15163780	92.67 ± 1.42	93.78 ± 1.38	0.016
GOLGA3	291.92 ± 38.75	341.37 ± 44.3	0.00178	0.0292	cg14903202	94.42 ± 1.59	95.4 ± 1.19	0.0164
GOLGA3	291.92 ± 38.75	341.37 ± 44.3	0.00178	0.0292	cg06262746	93.98 ± 0.8	94.93 ± 1.12	0.0195
GOLGA3	291.92 ± 38.75	341.37 ± 44.3	0.00178	0.0292	cg26692085	91.73 ± 1.73	92.78 ± 1.39	0.0235
GOLGA3	291.92 ± 38.75	341.37 ± 44.3	0.00178	0.0292	cg09971940	94.65 ± 1.02	95.39 ± 0.92	0.0255
GOLGA3	291.92 ± 38.75	341.37 ± 44.3	0.00178	0.0292	cg10158717	79.58 ± 2.56	81.69 ± 3.77	0.0276
GOLGA3	291.92 ± 38.75	341.37 ± 44.3	0.00178	0.0292	cg11642324	78.6 ± 3.28	80.41 ± 4.14	0.0285
GOLGA3	291.92 ± 38.75	341.37 ± 44.3	0.00178	0.0292	cg26326168	6.6 ± 0.54	6.19 ± 0.69	0.0288
GOLGA3	291.92 ± 38.75	341.37 ± 44.3	0.00178	0.0292	cg08695912	92 ± 1.58	92.96 ± 1.56	0.0303
GOLGA3	291.92 ± 38.75	341.37 ± 44.3	0.00178	0.0292	cg12156655	97.38 ± 0.91	98.01 ± 0.45	0.0304
GOLGA3	291.92 ± 38.75	341.37 ± 44.3	0.00178	0.0292	cg03619081	88.62 ± 12.54	90.94 ± 9.19	0.0305
GOLGA3	291.92 ± 38.75	341.37 ± 44.3	0.00178	0.0292	cg22798873	84.44 ± 4.18	86.43 ± 5.04	0.0458
GOLGA3	291.92 ± 38.75	341.37 ± 44.3	0.00178	0.0292	cg06860288	95.32 ± 0.91	95.98 ± 1.07	0.0473
GOLGA4	457.53 ± 73.1	557.94 ± 95.38	0.0028	0.0372	cg15065896	3.37 ± 0.48	2.97 ± 0.44	0.00624
GOLGA4	457.53 ± 73.1	557.94 ± 95.38	0.0028	0.0372	cg26850451	79.27 ± 2.92	82 ± 2.83	0.0106
GOLGA4	457.53 ± 73.1	557.94 ± 95.38	0.0028	0.0372	cg12984086	28.78 ± 4.91	31.69 ± 4.49	0.0176
GOLGA4	457.53 ± 73.1	557.94 ± 95.38	0.0028	0.0372	cg09456388	7.11 ± 0.74	8.02 ± 1.12	0.0245
GOLGA5	367.68 ± 51.84	422.6 ± 49.93	0.00131	0.0246	cg16195004	40.91 ± 2.59	44.48 ± 3.27	0.003
GOLGA5	367.68 ± 51.84	422.6 ± 49.93	0.00131	0.0246	cg24011198	6.09 ± 1.01	5.2 ± 0.99	0.00779
GOLM1	1482.94 ± 333.19	1209.18 ± 262.49	2.92e-05	0.0042	cg13737695	6.13 ± 0.55	5.53 ± 0.56	0.00859
GOLM1	1482.94 ± 333.19	1209.18 ± 262.49	2.92e-05	0.0042	cg24852661	16.92 ± 4.49	19.36 ± 5.48	0.00901
GOLT1B	796.54 ± 146.9	976.28 ± 145.33	8.42e-06	0.00239	cg14838474	5.45 ± 1.45	4.45 ± 0.95	0.00957
GOLT1B	796.54 ± 146.9	976.28 ± 145.33	8.42e-06	0.00239	cg27536708	5.49 ± 0.78	6.4 ± 0.75	0.0169
GOLT1B	796.54 ± 146.9	976.28 ± 145.33	8.42e-06	0.00239	cg05389560	15.25 ± 4.81	12.67 ± 3.37	0.0333
GOLT1B	796.54 ± 146.9	976.28 ± 145.33	8.42e-06	0.00239	cg22228488	5.7 ± 1.53	6.61 ± 1.04	0.0388
GORASP2	880.11 ± 121.04	984.32 ± 104.76	0.000298	0.0114	cg00782690	29.28 ± 7.36	33.52 ± 8.91	0.00531
GOSR2	234 ± 27.92	277.34 ± 45.4	0.00125	0.0239	cg26937061	2.49 ± 0.48	2.94 ± 0.52	0.0252
GPR110	246.66 ± 123.69	127.72 ± 61.86	4.39e-05	0.00488	cg21577639	77.23 ± 4.46	81.86 ± 3.78	0.00638
GPR125	217.94 ± 49.32	192.19 ± 40.72	0.000378	0.0129	cg08034505	89.77 ± 2.21	93.06 ± 1.3	0.000109
GPR125	217.94 ± 49.32	192.19 ± 40.72	0.000378	0.0129	cg16694489	89.69 ± 2.73	91.45 ± 2.49	0.00776
GPR125	217.94 ± 49.32	192.19 ± 40.72	0.000378	0.0129	cg13291296	95.38 ± 1.44	96.4 ± 0.62	0.0153
GPR34	7.26 ± 1.6	5.81 ± 0.96	0.00225	0.0329	cg16231355	82.9 ± 7.51	84.98 ± 9.4	0.0299
GPRASP2	273.98 ± 98.48	307.14 ± 96.54	0.0011	0.0223	cg05450314	27.27 ± 15.45	30.32 ± 16.39	0.00655
GPRC5B	796.94 ± 322.05	570.14 ± 251.08	6.32e-05	0.00549	cg02938926	24.18 ± 3.59	26.69 ± 3.87	1.93e-06
GPRC5B	796.94 ± 322.05	570.14 ± 251.08	6.32e-05	0.00549	cg05072547	86.41 ± 3.85	88.86 ± 2.9	0.0352
GPRC5B	796.94 ± 322.05	570.14 ± 251.08	6.32e-05	0.00549	cg10638734	30.21 ± 4.17	33.09 ± 5.46	0.0372
GPX3	1160.63 ± 474.09	1341.43 ± 482.77	0.000572	0.0158	cg11109721	83.31 ± 3.35	85.45 ± 3.47	0.013
GPX3	1160.63 ± 474.09	1341.43 ± 482.77	0.000572	0.0158	cg26891370	45.58 ± 5.98	48.9 ± 6.2	0.0172
GPX3	1160.63 ± 474.09	1341.43 ± 482.77	0.000572	0.0158	cg18849169	68.39 ± 2.59	70.31 ± 3.91	0.0231
GPX8	247.51 ± 86.32	204.15 ± 88.56	0.000276	0.011	cg27647613	26.2 ± 7.44	23.49 ± 7.52	0.0498
GRAMD4	211.45 ± 45.37	316.01 ± 123.31	0.00163	0.0279	cg00938380	92.14 ± 0.81	93.01 ± 1.26	0.0105
GREB1	71.75 ± 27.73	85.69 ± 29.79	0.000404	0.0131	cg17208060	57.29 ± 6.66	62.22 ± 5.59	0.00106
GREB1	71.75 ± 27.73	85.69 ± 29.79	0.000404	0.0131	cg24737570	78.03 ± 4.97	79.94 ± 4.93	0.00443
GREB1	71.75 ± 27.73	85.69 ± 29.79	0.000404	0.0131	cg11124360	92.24 ± 1.23	93.38 ± 1.22	0.0133
GREB1	71.75 ± 27.73	85.69 ± 29.79	0.000404	0.0131	cg05737004	94.72 ± 0.91	96.13 ± 1.14	0.0146
GREB1	71.75 ± 27.73	85.69 ± 29.79	0.000404	0.0131	cg00851111	86.44 ± 2.73	88.44 ± 2.67	0.0152
GREB1	71.75 ± 27.73	85.69 ± 29.79	0.000404	0.0131	cg11598054	78.53 ± 2.74	80.45 ± 2.06	0.019
GREB1	71.75 ± 27.73	85.69 ± 29.79	0.000404	0.0131	cg03365705	86.76 ± 4.29	89.01 ± 3.52	0.0201
GREB1	71.75 ± 27.73	85.69 ± 29.79	0.000404	0.0131	cg16097349	91.12 ± 1.62	92.69 ± 1.78	0.0216
GREB1	71.75 ± 27.73	85.69 ± 29.79	0.000404	0.0131	cg25649765	76.39 ± 9.93	78.93 ± 8.01	0.0218
GREB1	71.75 ± 27.73	85.69 ± 29.79	0.000404	0.0131	cg16185956	77.52 ± 3.25	80.26 ± 3.93	0.027
GREB1	71.75 ± 27.73	85.69 ± 29.79	0.000404	0.0131	cg03877767	40.97 ± 6.75	43.78 ± 8	0.0304
GREB1	71.75 ± 27.73	85.69 ± 29.79	0.000404	0.0131	cg26631397	96.59 ± 1.03	97.26 ± 0.89	0.0464
GRHL2	129.21 ± 42.02	111.53 ± 40.35	0.00397	0.0452	cg06287665	95.02 ± 1.17	95.87 ± 0.88	0.000669
GRHL2	129.21 ± 42.02	111.53 ± 40.35	0.00397	0.0452	cg11397370	8.15 ± 2.13	7.23 ± 2	0.00109
GRHL2	129.21 ± 42.02	111.53 ± 40.35	0.00397	0.0452	cg14686437	85.66 ± 8.96	80.93 ± 12.29	0.00796
GRHL2	129.21 ± 42.02	111.53 ± 40.35	0.00397	0.0452	cg23627353	94.9 ± 1.03	96 ± 1.37	0.0128
GRHL2	129.21 ± 42.02	111.53 ± 40.35	0.00397	0.0452	cg17140046	97.58 ± 0.6	97.91 ± 0.6	0.016
GRHL2	129.21 ± 42.02	111.53 ± 40.35	0.00397	0.0452	cg10899768	45.02 ± 10.49	40.93 ± 11.9	0.0182
GRHL2	129.21 ± 42.02	111.53 ± 40.35	0.00397	0.0452	cg03023152	27.99 ± 6.89	26.13 ± 8.74	0.0442
GRHL2	129.21 ± 42.02	111.53 ± 40.35	0.00397	0.0452	cg15748304	95.51 ± 0.92	96.36 ± 0.94	0.0469
GRK5	120.37 ± 29.33	94.96 ± 20.65	0.002	0.0312	cg03773192	33.25 ± 4.42	29.07 ± 3.3	0.00948
GRK5	120.37 ± 29.33	94.96 ± 20.65	0.002	0.0312	cg24919753	94.19 ± 0.93	95.12 ± 0.92	0.00993
GRK5	120.37 ± 29.33	94.96 ± 20.65	0.002	0.0312	cg14341467	50.91 ± 3.76	52.47 ± 4.09	0.0269
GRK5	120.37 ± 29.33	94.96 ± 20.65	0.002	0.0312	cg15220914	84.5 ± 2.22	86.57 ± 3.23	0.0422
GRN	1956.68 ± 228.19	1580.15 ± 194.75	1.11e-05	0.0027	cg16500497	69.4 ± 6.33	72.01 ± 6.5	0.0115
GRN	1956.68 ± 228.19	1580.15 ± 194.75	1.11e-05	0.0027	cg20679560	3.49 ± 0.63	4.19 ± 0.92	0.0153
GRN	1956.68 ± 228.19	1580.15 ± 194.75	1.11e-05	0.0027	cg24420717	53.62 ± 2.38	55.99 ± 3.23	0.0177
GRN	1956.68 ± 228.19	1580.15 ± 194.75	1.11e-05	0.0027	cg17714154	45.5 ± 1.56	44.6 ± 0.7	0.0335
GSDMB	61.77 ± 26.88	42.61 ± 14.94	5.95e-05	0.00544	cg03190929	95.15 ± 1.22	96.21 ± 0.68	0.024
GSTA1	1100.41 ± 585.7	864.38 ± 457.31	0.00132	0.0247	cg10107264	84.88 ± 2.94	86.86 ± 2.8	0.0329
GSTK1	362.44 ± 54.44	308.47 ± 64.98	0.00117	0.0232	cg03879613	64.75 ± 2.35	67.04 ± 1.78	0.00131
GSTK1	362.44 ± 54.44	308.47 ± 64.98	0.00117	0.0232	cg11021031	3.08 ± 0.42	2.6 ± 0.21	0.00181
GSTM2	108.38 ± 16.68	94.59 ± 18.99	0.00127	0.0242	cg02337836	4.52 ± 1.2	4.9 ± 1.22	0.025
GSTM2	108.38 ± 16.68	94.59 ± 18.99	0.00127	0.0242	cg10537017	63.63 ± 2.5	65.35 ± 2.09	0.0437
GTF2E2	349.09 ± 34.02	392.94 ± 33.79	0.000555	0.0155	cg04905173	52.87 ± 2.67	55.62 ± 3.08	0.00572
GTF2E2	349.09 ± 34.02	392.94 ± 33.79	0.000555	0.0155	cg03655174	22.58 ± 4.48	26.4 ± 5.72	0.0108
GTF2E2	349.09 ± 34.02	392.94 ± 33.79	0.000555	0.0155	cg18356330	3.16 ± 0.68	2.9 ± 0.46	0.0399
GTPBP2	208.28 ± 32.17	266.75 ± 50.61	0.00124	0.0237	cg06984657	6.39 ± 0.95	5.65 ± 0.85	0.012
GTPBP2	208.28 ± 32.17	266.75 ± 50.61	0.00124	0.0237	cg22792272	5.82 ± 0.58	6.6 ± 0.89	0.0173
GTPBP2	208.28 ± 32.17	266.75 ± 50.61	0.00124	0.0237	cg14465910	4.69 ± 0.61	5.45 ± 0.66	0.0215
GUK1	587.1 ± 53.31	646.87 ± 50.96	0.00123	0.0236	cg11172511	4.3 ± 0.41	4.76 ± 0.48	0.0351
[truncated: 3,572 more rows]
