# Supplementary material for: Glucolipotoxicity Alters Insulin Secretion via Epigenetic Changes in Human Islets
Source: Oxford University Press journal article supplement (doi:10.2337/db18-0900), 2019-08-16
Supplement: db180900supplementarydata8.xlsx [file db180900supplementarydata8.xlsx]

## Sheet: enrichment_results_wg_result155
Supplementary Table 7. Pathways enriched for genes exhibiting both altered expression (q<0.05) and DNA methylation (p<0.05) in human islets after treatment with high levels of palmitate and glucose
Geneset	Description	No. of genes in category	Observed genes	Expected genes	Ratio of enrichment	p-value	q-value	Genes
R-HSA-381070	IRE1alpha activates chaperones	50	22	4.61	4.77	9.36e-11	1.48e-07	CTDSP2;HYOU1;YIF1A;ADD1;ERN1;SEC31A;SEC61G;SEC61A1;LMNA;DNAJB9;DNAJB11;FKBP14;WIPI1;DNAJC3;SRPRB;TSPYL2;SRPRA;SSR1;XBP1;GOSR2;EDEM1;CUL7
R-HSA-381038	XBP1(S) activates chaperone genes	48	21	4.42	4.75	2.86e-10	1.5e-07	CTDSP2;HYOU1;YIF1A;ADD1;SEC31A;SEC61G;SEC61A1;LMNA;DNAJB9;DNAJB11;FKBP14;WIPI1;DNAJC3;SRPRB;TSPYL2;SRPRA;SSR1;XBP1;GOSR2;EDEM1;CUL7
R-HSA-381119	Unfolded Protein Response (UPR)	77	27	7.1	3.8	3.69e-10	1.5e-07	CTDSP2;HYOU1;YIF1A;EXOSC8;ADD1;DDIT3;ERN1;SEC31A;SEC61G;SEC61A1;LMNA;DNAJB9;ATF3;EXOSC1;DNAJB11;FKBP14;WIPI1;DNAJC3;SRPRB;TSPYL2;SRPRA;SSR1;XBP1;EIF2AK3;GOSR2;EDEM1;CUL7
R-HSA-1474244	Extracellular matrix organization	275	59	25.35	2.33	3.8e-10	1.5e-07	ADAM10;P3H3;ADAMTS5;COL1A1;COL1A2;COL4A1;COL4A2;COL5A1;COL5A2;COL6A1;COL6A3;COL12A1;VCAN;CTSD;DCN;TMPRSS6;FBN1;NID2;ITGA11;FN1;HSPG2;ICAM2;APP;ITGA3;ITGA4;ITGB3;ITGB4;AGRN;KDR;LAMA2;LAMB1;LAMB2;LAMC1;LOXL2;LTBP1;LTBP2;MMP14;MMP15;NID1;P4HB;PCOLCE;HTRA1;PTPRS;NTN4;BGN;SDC1;SDC4;BMP1;TIMP1;TIMP2;TLL1;TLL2;CAPNS1;CAPN6;CAST;ITGA10;SERPINH1;ADAM9;CDH1
R-HSA-1474228	Degradation of the extracellular matrix	126	33	11.62	2.84	2.07e-08	5.55e-06	ADAM10;ADAMTS5;COL1A1;COL1A2;COL4A1;COL4A2;COL5A1;COL5A2;COL6A1;COL6A3;COL12A1;CTSD;DCN;TMPRSS6;FBN1;FN1;HSPG2;LAMB1;LAMC1;MMP14;MMP15;NID1;HTRA1;BMP1;TIMP1;TIMP2;TLL1;TLL2;CAPNS1;CAPN6;CAST;ADAM9;CDH1
R-HSA-392499	Metabolism of proteins	1457	193	134.31	1.44	2.11e-08	5.55e-06	COX17;CTDSP2;CHST4;TRIM13;PSMD14;STAM2;SPON2;CEACAM5;HYOU1;CTSC;CFTR;SEC24A;YIF1A;LMAN2;KDELR2;RAB31;UBE2C;ADAMTS5;MGAT4B;COPE;EXOSC8;LYPD1;RAB39B;ADD1;COPA;COPB1;CD109;CPE;CPM;CTNNB1;CTSD;CTSH;CD55;DDIT3;DDOST;EEF1A2;EIF4EBP1;EIF5;ALG14;MUC20;ERN1;ETF1;COPZ1;COPG1;SEC31A;RAB18;GGA2;SCFD1;ICMT;SEC61G;FUT8;GALNT2;ARFGAP3;GBA;TIMM9;RAB30;MAT2B;GNG4;GNG5;GNGT1;GOLGA2;ANPEP;GMPPA;SEC61A1;LMCD1;H3F3A;…
R-HSA-446203	Asparagine N-linked glycosylation	282	54	26	2.08	1.31e-07	2.96e-05	TRIM13;CTSC;SEC24A;LMAN2;KDELR2;MGAT4B;COPE;COPA;COPB1;CD55;DDOST;ALG14;COPZ1;COPG1;SEC31A;SCFD1;FUT8;ARFGAP3;GOLGA2;GMPPA;ARCN1;ARF4;LMAN1;MAN2A2;MIA2;DERL2;BET1L;PGM3;PMM2;NANS;CTSA;EDEM2;COG6;RPN1;RPN2;SEC13;UAP1;SPTBN1;STX5;TUBA4A;ALG9;DHDDS;CANX;COG3;MAGT1;USO1;DPM1;MCFD2;B4GALT5;SEC22B;GOSR2;CD59;EDEM1;SEC24D
R-HSA-1799339	SRP-dependent cotranslational protein targeting to membrane	104	27	9.59	2.82	4.82e-07	9.51e-05	DDOST;SEC61G;SEC61A1;RPL10A;SRPRB;RPL9;RPL10;RPL18A;RPL21;RPL24;RPL36AL;RPL38;RPL41;RPL36A;RPN1;RPN2;RPS3A;RPS7;RPS25;SRP54;SRP68;SRPRA;SSR1;SSR2;SSR3;SEC11C;SPCS2
R-HSA-72766	Translation	144	33	13.27	2.49	6.25e-07	0.00011	DDOST;EEF1A2;EIF4EBP1;EIF5;ETF1;SEC61G;SEC61A1;RPL10A;SRPRB;RPL9;RPL10;RPL18A;RPL21;RPL24;RPL36AL;RPL38;RPL41;RPL36A;RPN1;RPN2;RPS3A;RPS7;RPS25;SRP54;SRP68;SRPRA;SSR1;SSR2;SSR3;EIF3F;EIF2S2;SEC11C;SPCS2
R-HSA-3000171	Non-integrin membrane-ECM interactions	54	18	4.98	3.62	7.67e-07	0.000121	COL1A1;COL1A2;COL4A1;COL4A2;COL5A1;COL5A2;FN1;HSPG2;ITGB3;ITGB4;AGRN;LAMA2;LAMB1;LAMB2;LAMC1;NTN4;SDC1;SDC4
R-HSA-199977	ER to Golgi Anterograde Transport	138	31	12.72	2.44	2.14e-06	0.000308	CTSC;SEC24A;LMAN2;KDELR2;COPE;COPA;COPB1;CD55;COPZ1;COPG1;SEC31A;SCFD1;ARFGAP3;GOLGA2;ARCN1;ARF4;LMAN1;MIA2;BET1L;COG6;SEC13;SPTBN1;STX5;TUBA4A;COG3;USO1;MCFD2;SEC22B;GOSR2;CD59;SEC24D
R-HSA-2132295	MHC class II antigen presentation	113	27	10.42	2.59	2.79e-06	0.000366	KIF20A;IFI30;CTSC;SEC24A;CTSD;CTSE;CTSH;CTSO;DNM2;SEC31A;RACGAP1;HLA-DMA;HLA-DMB;HLA-DPA1;HLA-DQA1;HLA-DQB1;HLA-DRA;HLA-DRB5;KIF5A;KIF11;KIF22;CTSA;SEC13;TUBA4A;CANX;CD74;SEC24D
R-HSA-948021	Transport to the Golgi and subsequent modification	169	35	15.58	2.25	3.54e-06	0.000425	CTSC;SEC24A;LMAN2;KDELR2;MGAT4B;COPE;COPA;COPB1;CD55;COPZ1;COPG1;SEC31A;SCFD1;FUT8;ARFGAP3;GOLGA2;ARCN1;ARF4;LMAN1;MAN2A2;MIA2;BET1L;COG6;SEC13;SPTBN1;STX5;TUBA4A;COG3;USO1;MCFD2;B4GALT5;SEC22B;GOSR2;CD59;SEC24D
R-HSA-3000178	ECM proteoglycans	71	20	6.54	3.06	3.77e-06	0.000425	COL1A1;COL1A2;COL4A1;COL4A2;COL5A1;COL5A2;COL6A1;COL6A3;VCAN;DCN;FN1;APP;ITGB3;AGRN;LAMA2;LAMB1;LAMB2;LAMC1;PTPRS;BGN
R-HSA-3000157	Laminin interactions	26	11	2.4	4.59	8.1e-06	0.000852	COL4A1;COL4A2;NID2;HSPG2;ITGA3;ITGB4;LAMA2;LAMB1;LAMB2;LAMC1;NID1
R-HSA-2243919	Crosslinking of collagen fibrils	11	7	1.01	6.9	1.31e-05	0.00129	COL1A1;COL1A2;LOXL2;PCOLCE;BMP1;TLL1;TLL2
R-HSA-216083	Integrin cell surface interactions	80	20	7.37	2.71	2.65e-05	0.00238	COL1A1;COL1A2;COL4A1;COL4A2;COL5A1;COL5A2;COL6A1;COL6A3;FBN1;ITGA11;FN1;HSPG2;ICAM2;ITGA3;ITGA4;ITGB3;AGRN;KDR;ITGA10;CDH1
R-HSA-6811434	COPI-dependent Golgi-to-ER retrograde traffic	93	22	8.57	2.57	2.71e-05	0.00238	KIF20A;KIF1C;KDELR2;COPE;COPA;COPB1;COPZ1;COPG1;KIF13B;ARFGAP3;RACGAP1;ARCN1;ARF4;KIF5A;KIF11;KIF22;KIF26B;RINT1;BNIP1;SURF4;TUBA4A;SEC22B
R-HSA-2214320	Anchoring fibril formation	13	7	1.2	5.84	5.77e-05	0.00479	COL1A1;COL1A2;COL4A1;COL4A2;BMP1;TLL1;TLL2
R-HSA-5694530	Cargo concentration in the ER	32	11	2.95	3.73	8.06e-05	0.00621	CTSC;SEC24A;LMAN2;LMAN1;MIA2;STX5;MCFD2;SEC22B;GOSR2;CD59;SEC24D
R-HSA-8874081	MET activates PTK2 signaling	27	10	2.49	4.02	8.26e-05	0.00621	COL1A1;COL1A2;COL5A1;COL5A2;FN1;ITGA3;LAMA2;LAMB1;LAMB2;LAMC1
R-HSA-6807878	COPI-mediated anterograde transport	87	20	8.02	2.49	9.58e-05	0.00687	KDELR2;COPE;COPA;COPB1;CD55;COPZ1;COPG1;ARFGAP3;GOLGA2;ARCN1;ARF4;BET1L;COG6;SPTBN1;STX5;TUBA4A;COG3;USO1;GOSR2;CD59
R-HSA-6811442	Intra-Golgi and retrograde Golgi-to-ER traffic	189	34	17.42	1.95	0.000105	0.00717	KIF20A;KIF1C;KDELR2;COPE;COPA;COPB1;COPZ1;COPG1;RAB18;KIF13B;GALNT2;ARFGAP3;RAB30;GOLGA4;RACGAP1;ARCN1;ARF4;KIF5A;KIF11;KIF22;ARL1;MAN2A2;BET1L;KIF26B;COG6;RINT1;BNIP1;STX5;SURF4;TUBA4A;COG3;SEC22B;GOSR2;GOLGA5
R-HSA-2022090	Assembly of collagen fibrils and other multimeric structures	56	15	5.16	2.91	0.000115	0.00756	COL1A1;COL1A2;COL4A1;COL4A2;COL5A1;COL5A2;COL6A1;COL6A3;COL12A1;ITGB4;LOXL2;PCOLCE;BMP1;TLL1;TLL2
R-HSA-1650814	Collagen biosynthesis and modifying enzymes	63	16	5.81	2.76	0.000137	0.00863	P3H3;COL1A1;COL1A2;COL4A1;COL4A2;COL5A1;COL5A2;COL6A1;COL6A3;COL12A1;P4HB;PCOLCE;BMP1;TLL1;TLL2;SERPINH1
R-HSA-8856688	Golgi-to-ER retrograde transport	121	24	11.15	2.15	0.000237	0.0141	KIF20A;KIF1C;KDELR2;COPE;COPA;COPB1;COPZ1;COPG1;RAB18;KIF13B;GALNT2;ARFGAP3;RACGAP1;ARCN1;ARF4;KIF5A;KIF11;KIF22;KIF26B;RINT1;BNIP1;SURF4;TUBA4A;SEC22B
R-HSA-3000170	Syndecan interactions	25	9	2.3	3.91	0.000242	0.0141	COL1A1;COL1A2;COL5A1;COL5A2;FN1;ITGB3;ITGB4;SDC1;SDC4
R-HSA-1442490	Collagen degradation	61	15	5.62	2.67	0.000322	0.0182	ADAM10;COL1A1;COL1A2;COL4A1;COL4A2;COL5A1;COL5A2;COL6A1;COL6A3;COL12A1;CTSD;TMPRSS6;MMP14;MMP15;ADAM9
R-HSA-1643685	Disease	783	100	72.18	1.39	0.000362	0.0197	BCL2L11;MAMLD1;ADAM10;PSMD14;CDK7;STAM2;CDKN1A;SPON2;CFTR;FAM114A2;ADAMTS5;ANTXR2;PIK3AP1;CSK;VCAN;CTNNB1;DAB2IP;DCN;JAG1;MUC20;ERBB2;RASA3;MPRIP;NEDD4L;FN1;GCKR;HEYL;DKK4;GOLGA2;SLC25A5;GTF2E2;GYG1;HCK;HDAC1;HDAC2;HSPG2;APP;ITGB3;AGRN;KPNA5;LMNA;ARRB1;SMAD3;MUC1;RPL10A;NFKB2;NFKBIB;NOTCH1;NOTCH2;NOTCH3;PRDX1;DERL2;PDGFRA;PIK3R1;ESRP1;VPS37C;PPP2R5D;NDC1;MAP2K3;DNAJC3;PSMA5;MCCC1;ACTB;BCR;RPL9;RP…
R-HSA-8875878	MET promotes cell motility	38	11	3.5	3.14	0.000449	0.0236	COL1A1;COL1A2;COL5A1;COL5A2;CRK;FN1;ITGA3;LAMA2;LAMB1;LAMB2;LAMC1
R-HSA-1474290	Collagen formation	84	18	7.74	2.32	0.000529	0.026	P3H3;COL1A1;COL1A2;COL4A1;COL4A2;COL5A1;COL5A2;COL6A1;COL6A3;COL12A1;ITGB4;LOXL2;P4HB;PCOLCE;BMP1;TLL1;TLL2;SERPINH1
R-HSA-5653656	Vesicle-mediated transport	634	83	58.44	1.42	0.000543	0.026	ARPC5;KIF20A;STAM2;HYOU1;KIF1C;CTSC;CFTR;SEC24A;LMAN2;KDELR2;RAB31;COPE;RAB39B;COL1A1;COL1A2;COL4A1;COL4A2;COPA;COPB1;CD55;DNM2;COPZ1;COPG1;AAK1;SEC31A;RAB18;GGA2;SCFD1;KIF13B;RHOQ;FTL;GALNT2;ARFGAP3;RAB30;GOLGA2;GOLGA4;RACGAP1;HIP1;APP;ARCN1;ARF4;KIF5A;ARF6;KIF11;KIF22;LMAN1;ARL1;ARRB1;MAN2A2;MIA2;TRAPPC12;COPS4;BET1L;VPS37C;KIF26B;COG6;TBC1D14;RAB4A;RAB5A;ACTB;RINT1;SEC13;ITSN1;BNIP1;SPTBN1;STX…
R-HSA-418990	Adherens junctions interactions	33	10	3.04	3.29	0.000543	0.026	CDH3;CDH6;CDH11;CDH17;CTNNA1;CTNNB1;CADM1;JUP;ACTB;CDH1
R-HSA-204005	COPII (Coat Protein 2) Mediated Vesicle Transport	66	15	6.08	2.47	0.000792	0.0368	CTSC;SEC24A;LMAN2;SEC31A;SCFD1;GOLGA2;LMAN1;SEC13;STX5;USO1;MCFD2;SEC22B;GOSR2;CD59;SEC24D
R-HSA-3560783	Defective B4GALT7 causes EDS, progeroid type	19	7	1.75	4	0.00103	0.044	VCAN;DCN;HSPG2;AGRN;BGN;SDC1;SDC4
R-HSA-3560801	Defective B3GAT3 causes JDSSDHD	19	7	1.75	4	0.00103	0.044	VCAN;DCN;HSPG2;AGRN;BGN;SDC1;SDC4
R-HSA-4420332	Defective B3GALT6 causes EDSP2 and SEMDJL1	19	7	1.75	4	0.00103	0.044	VCAN;DCN;HSPG2;AGRN;BGN;SDC1;SDC4
R-HSA-2514853	Condensation of Prometaphase Chromosomes	10	5	0.92	5.42	0.00112	0.0464	NCAPH;NCAPG;CCNB1;CDK1;NCAPD2
