# Supplementary material for: Glucolipotoxicity Alters Insulin Secretion via Epigenetic Changes in Human Islets
Source: Oxford University Press journal article supplement (doi:10.2337/db18-0900), 2019-08-16
Supplement: db180900supplementarydata9.xlsx [file db180900supplementarydata9.xlsx]

## Sheet: final_results_sign
Supplementary Table 8. CpG sites that are differentially methylated in EndoC-βH1 CpG sites after 48h treatment with high glucose and palmitate (p<0.05)
*Some CpG sites are annotated to several transcripts from the same gene, or to several genes
		GLTx acute vs control treated cells			GLTx acute vs GLTx recov
TargetID	Gene symbol*	p-value	% Methylation Control (mean ± SD)	% Methylation GLTx acute (mean ± SD)	p-value	% Methylation GLTx acute (mean ± SD)	% Methylation GLTx recov (mean ± SD)
cg12166599	APEX2	5.26e-06	6.78 ± 0.9	4.5 ± 0.65	0.676962	4.5 ± 0.65	4.96 ± 1.49
cg06224613	VIMP;VIMP	7.76e-06	3.89 ± 0.77	5.41 ± 1.1	0.27156	5.41 ± 1.1	4.61 ± 0.78
cg23933355	ATP8A2	1.11e-05	84.11 ± 2.26	88.57 ± 1.6	0.0890984	88.57 ± 1.6	86.52 ± 3.18
cg23317297	AKR1A1;AKR1A1;AKR1A1;AKR1A1	1.24e-05	20.01 ± 1.18	22.58 ± 1.38	0.0735073	22.58 ± 1.38	20.93 ± 0.62
cg05812458	EGFEM1P	1.25e-05	86.02 ± 0.73	88.68 ± 0.92	0.063089	88.68 ± 0.92	87.14 ± 1.17
cg21538194	DZIP1L	1.55e-05	3.44 ± 0.41	2.51 ± 0.35	0.0416874	2.51 ± 0.35	3.45 ± 0.69
cg13030383	Intergenic	1.76e-05	93.79 ± 0.53	94.87 ± 0.42	0.141523	94.87 ± 0.42	94.11 ± 0.8
cg13899529	EFR3B	1.86e-05	6.01 ± 0.67	8.89 ± 1	0.0270217	8.89 ± 1	7.34 ± 1.08
cg16992165	Intergenic	1.89e-05	77.19 ± 1.32	78.9 ± 1.32	0.441615	78.9 ± 1.32	78.23 ± 0.92
cg06694588	CDKL5;CDKL5	1.92e-05	91.19 ± 0.91	85.89 ± 1.43	0.295961	85.89 ± 1.43	88.23 ± 5.89
cg11651785	LETM2;LETM2;LETM2;LETM2;LETM2;LETM2	1.96e-05	9.14 ± 0.55	10.78 ± 0.5	0.0208476	10.78 ± 0.5	8.59 ± 1.66
cg27461425	KRT71	2.07e-05	3.74 ± 0.3	3.18 ± 0.29	0.216428	3.18 ± 0.29	3.6 ± 0.66
cg01684629	Intergenic	2.08e-05	14.12 ± 2.19	17.95 ± 2.73	0.139275	17.95 ± 2.73	14.12 ± 4.57
cg09028204	KCNS1	2.14e-05	4.23 ± 0.75	5.02 ± 0.91	0.534967	5.02 ± 0.91	4.72 ± 0.86
cg04572861	LOC102724691;MRPS9	2.29e-05	6.59 ± 0.99	5.14 ± 0.79	0.046717	5.14 ± 0.79	5.64 ± 0.9
cg21760006	Intergenic	2.29e-05	7.96 ± 1.2	10.84 ± 1.2	0.222032	10.84 ± 1.2	9.06 ± 2.49
cg24654877	VPS13D;VPS13D	2.51e-05	91.53 ± 1.09	88.42 ± 1.55	0.117805	88.42 ± 1.55	89.76 ± 1.08
cg24416818	Intergenic	2.61e-05	55.75 ± 2.19	53.83 ± 2.21	0.433746	53.83 ± 2.21	55.06 ± 3.08
cg02590376	BRD2;BRD2	2.66e-05	71.06 ± 2.31	74.49 ± 1.81	0.15072	74.49 ± 1.81	73.12 ± 2.7
cg05203613	LAG3	2.68e-05	23.3 ± 1.05	27 ± 1.47	0.0128814	27 ± 1.47	23.1 ± 1.36
cg12978798	NPLOC4;TSPAN10	2.92e-05	34.29 ± 3.41	38.93 ± 3.81	0.726814	38.93 ± 3.81	37.69 ± 5.28
cg04474265	DCTN2	3.03e-05	5.32 ± 0.83	4.33 ± 0.74	0.04917	4.33 ± 0.74	5.55 ± 0.5
cg16613012	TMEM87A;TMEM87A;GANC	3.16e-05	2.9 ± 0.4	2.21 ± 0.31	0.626077	2.21 ± 0.31	2.32 ± 0.46
cg00657810	WWP2;WWP2	3.17e-05	88.02 ± 1.57	90.85 ± 1.33	0.238844	90.85 ± 1.33	89.25 ± 2.48
cg04462468	LOC100506127;LOC100506127;LOC100506127;LOC100506127	3.58e-05	82.82 ± 2.22	80.51 ± 2.32	0.300509	80.51 ± 2.32	79.62 ± 1.78
cg00611847	DDC-AS1;DDC;DDC;DDC;DDC;DDC;DDC;DDC	3.66e-05	8.34 ± 0.85	11.15 ± 0.86	0.256658	11.15 ± 0.86	9.51 ± 3.12
cg20973720	RASGRF1;RASGRF1;RASGRF1;RASGRF1	3.69e-05	4.14 ± 0.85	2.99 ± 0.6	0.422126	2.99 ± 0.6	2.76 ± 0.3
cg17234979	MATN1-AS1;MATN1	3.75e-05	23.15 ± 1.73	25.34 ± 1.83	0.238444	25.34 ± 1.83	24.26 ± 3.41
cg03557391	PDE5A;PDE5A;PDE5A;PDE5A	3.91e-05	3.78 ± 0.53	3.38 ± 0.49	0.228744	3.38 ± 0.49	3.71 ± 0.75
cg21214753	TP63;TP63;TP63;TP63;TP63;TP63	4.13e-05	77.63 ± 4.84	85.68 ± 3.12	0.545561	85.68 ± 3.12	86.83 ± 4.91
cg09039845	NCKAP1L	4.15e-05	38.23 ± 3.31	40.36 ± 3.72	0.148358	40.36 ± 3.72	38.38 ± 1.99
cg09599228	RXFP1	4.22e-05	6.38 ± 0.85	7.98 ± 1.09	0.0900781	7.98 ± 1.09	6.55 ± 1.39
cg17552460	MAP4K4;MAP4K4;MAP4K4;MAP4K4;MAP4K4	4.25e-05	71.97 ± 1.94	74.41 ± 1.87	0.266773	74.41 ± 1.87	73.19 ± 1.38
cg01999922	THADA;THADA;THADA;THADA;THADA	4.44e-05	84.23 ± 1.65	90.69 ± 1.7	0.199958	90.69 ± 1.7	87.28 ± 4.48
cg18210414	RPS15AP10;GPBP1L1	4.69e-05	96.73 ± 0.56	95.49 ± 0.84	0.0415863	95.49 ± 0.84	96.34 ± 0.97
cg25368317	ENTPD7	4.73e-05	90.74 ± 0.69	91.91 ± 0.48	0.119062	91.91 ± 0.48	91.04 ± 1.18
cg21496096	PRKD2;PRKD2;PRKD2;PRKD2	5.2e-05	92.51 ± 1.32	94.07 ± 0.85	0.341365	94.07 ± 0.85	93.69 ± 1.03
cg03595899	PRPF18	5.62e-05	88.92 ± 0.67	91.7 ± 0.94	0.0036423	91.7 ± 0.94	89.06 ± 0.84
cg07126979	PODXL2	5.76e-05	89.9 ± 0.8	87.99 ± 0.98	0.0860664	87.99 ± 0.98	89.52 ± 1.48
cg03365896	Intergenic	5.95e-05	23.61 ± 4.68	27.7 ± 5.22	0.0238138	27.7 ± 5.22	25.95 ± 4.58
cg07334644	Intergenic	6.27e-05	20.18 ± 1.27	22.37 ± 1.18	0.0112823	22.37 ± 1.18	20.26 ± 1.82
cg06100588	MED13L	6.49e-05	95.2 ± 0.75	96.1 ± 0.7	0.82557	96.1 ± 0.7	95.99 ± 1.7
cg08842200	DCHS2;DCHS2	6.49e-05	4.2 ± 0.24	5.5 ± 0.21	0.175379	5.5 ± 0.21	5.26 ± 0.23
cg14134054	IARS;IARS;SNORA84;IARS	6.76e-05	4.86 ± 0.84	2.84 ± 0.71	0.0694299	2.84 ± 0.71	3.61 ± 0.81
cg23475787	LINC01194	6.81e-05	53.84 ± 1.51	56.01 ± 1.44	0.952623	56.01 ± 1.44	56.08 ± 2.36
cg26846726	PRMT1;PRMT1;PRMT1	6.88e-05	6.51 ± 0.81	5.56 ± 0.74	0.675765	5.56 ± 0.74	5.4 ± 0.49
cg00297423	LINC01095	7.07e-05	63.28 ± 1.3	65.76 ± 1.27	0.0935402	65.76 ± 1.27	64.28 ± 1.4
cg17493391	Intergenic	7.28e-05	84.27 ± 0.78	86.7 ± 0.72	0.934784	86.7 ± 0.72	86.68 ± 1.74
cg17651633	COX7A2L	7.34e-05	6.11 ± 1.59	4.5 ± 1.07	0.70153	4.5 ± 1.07	4.81 ± 1.32
cg07721547	C22orf32;FAM109B	7.41e-05	46.83 ± 2.76	47.74 ± 2.89	0.0387135	47.74 ± 2.89	46.24 ± 1.71
cg02142657	ANGEL1	7.76e-05	5.55 ± 0.51	6.97 ± 0.44	0.0119028	6.97 ± 0.44	5.84 ± 0.81
cg09518506	SQSTM1;SQSTM1	7.79e-05	60.43 ± 4.15	63.43 ± 4.35	0.12256	63.43 ± 4.35	59.87 ± 3.32
cg09257432	XCR1;XCR1	8.36e-05	42.23 ± 1.17	44.82 ± 1.4	0.46602	44.82 ± 1.4	44.38 ± 0.4
cg10041962	ARHGAP26;ARHGAP26	8.6e-05	94.75 ± 1.03	92.43 ± 1.72	0.407415	92.43 ± 1.72	93.18 ± 0.76
cg22861965	AAAS	8.6e-05	4.19 ± 0.77	3.04 ± 0.72	0.77496	3.04 ± 0.72	3.5 ± 1.44
cg02020590	Intergenic	8.63e-05	73.21 ± 1.29	75.08 ± 1.21	0.190471	75.08 ± 1.21	73.47 ± 1.83
cg23761995	Intergenic	8.82e-05	36.81 ± 3	39.93 ± 2.77	0.0528101	39.93 ± 2.77	36.85 ± 1.97
cg02263539	ST6GAL1;ST6GAL1	9.01e-05	8.86 ± 1.47	6.55 ± 1.1	0.0127629	6.55 ± 1.1	8.48 ± 0.81
cg14070577	Intergenic	9.28e-05	9.63 ± 1.11	11.13 ± 1.11	0.117375	11.13 ± 1.11	9.59 ± 1.14
cg24325712	Intergenic	9.47e-05	95.25 ± 0.84	96 ± 0.69	0.0729033	96 ± 0.69	95.38 ± 0.51
cg27145197	ANKRD44	9.64e-05	87.72 ± 0.99	90.36 ± 0.58	0.329301	90.36 ± 0.58	89.52 ± 1.67
cg10332413	Intergenic	9.65e-05	35.1 ± 3.31	37.81 ± 3.54	0.0139847	37.81 ± 3.54	35.88 ± 2.87
cg18418707	Intergenic	9.67e-05	31.68 ± 2.14	35.46 ± 2.6	0.0228185	35.46 ± 2.6	32.3 ± 2.52
cg25559913	FAM104A;FAM104A;FAM104A;FAM104A;FAM104A	9.79e-05	85.36 ± 0.87	87.39 ± 0.53	0.109807	87.39 ± 0.53	85.91 ± 2.09
cg19126007	Intergenic	9.83e-05	86.99 ± 1.18	85.04 ± 1.66	0.165161	85.04 ± 1.66	84.06 ± 1.57
cg00035923	C7orf50;C7orf50;C7orf50	0.000103	82.78 ± 1.53	83.96 ± 1.59	0.525533	83.96 ± 1.59	84.53 ± 1.47
cg05307141	METTL11B	0.0001041	29.04 ± 3.49	32.29 ± 3.96	0.100239	32.29 ± 3.96	30.03 ± 3.22
cg12959121	KIAA0586;TIMM9	0.0001045	22.18 ± 3.19	26.21 ± 3.22	0.770576	26.21 ± 3.22	25.77 ± 1.6
cg08314156	Intergenic	0.0001068	96.26 ± 0.7	97.23 ± 0.58	0.13192	97.23 ± 0.58	96.51 ± 0.55
cg19606569	TMEM156;TMEM156	0.0001094	92.82 ± 0.86	94.65 ± 0.43	0.517451	94.65 ± 0.43	94.92 ± 1.38
cg22202264	IGSF9B	0.000111	70.67 ± 2.31	77.35 ± 1.74	0.0191603	77.35 ± 1.74	70.48 ± 6.03
cg24022801	Intergenic	0.0001126	93.87 ± 0.74	91.59 ± 0.71	0.0407823	91.59 ± 0.71	93.51 ± 1.03
cg10961414	Intergenic	0.0001146	87.44 ± 0.51	84.67 ± 0.93	0.444958	84.67 ± 0.93	85.34 ± 2
cg14791734	CAPN1;CAPN1;CAPN1;CAPN1	0.000115	5.68 ± 0.28	4.87 ± 0.21	0.296591	4.87 ± 0.21	5.12 ± 0.41
cg25918505	C1orf167	0.000115	36.14 ± 2.78	37.36 ± 2.77	0.471614	37.36 ± 2.77	36.96 ± 2.51
cg26675625	BTG1	0.0001151	5.98 ± 0.94	7.13 ± 1.1	0.808636	7.13 ± 1.1	6.92 ± 0.85
cg21501358	KLHL14	0.0001165	34.07 ± 3.36	36.05 ± 3.55	0.246051	36.05 ± 3.55	35.01 ± 3.5
cg01526547	COL4A1;COL4A1	0.0001273	45.12 ± 3.25	48.66 ± 3.18	0.749097	48.66 ± 3.18	48.21 ± 3.58
cg03506657	TBXAS1;TBXAS1;TBXAS1;TBXAS1;TBXAS1;TBXAS1	0.0001273	85.6 ± 1.95	88.34 ± 1.84	0.261041	88.34 ± 1.84	87.58 ± 1.76
cg12373573	TSPAN19;TSPAN19;LRRIQ1;LRRIQ1	0.0001276	7.21 ± 1.02	8.48 ± 1.27	0.602651	8.48 ± 1.27	8.15 ± 2.06
cg14934468	Intergenic	0.0001281	5.75 ± 0.95	4.35 ± 0.58	0.0113834	4.35 ± 0.58	5.67 ± 0.6
cg12102235	Intergenic	0.0001309	88.63 ± 1.01	90.53 ± 1.11	0.463415	90.53 ± 1.11	91.12 ± 1.64
cg14009629	ATP10D;ATP10D	0.0001314	94.77 ± 0.97	92.13 ± 1.47	0.0810464	92.13 ± 1.47	93.33 ± 1.87
cg05941819	TMEM39B	0.0001319	94.38 ± 0.72	95.97 ± 0.44	0.124959	95.97 ± 0.44	94.94 ± 1.2
cg20968048	Intergenic	0.0001322	31.55 ± 2.15	25.77 ± 2.11	0.0739757	25.77 ± 2.11	31.42 ± 6.93
cg11066580	FOXK1	0.0001341	95.04 ± 0.96	96.29 ± 0.91	0.320373	96.29 ± 0.91	95.52 ± 1.61
cg20937204	Intergenic	0.0001353	52.96 ± 2.26	50.02 ± 2.24	0.399958	50.02 ± 2.24	50.8 ± 1.29
cg14838732	ZFYVE9;ZFYVE9	0.0001361	93.36 ± 0.57	95.04 ± 0.57	0.612549	95.04 ± 0.57	94.86 ± 0.67
cg18660891	ZBTB20	0.0001403	4.7 ± 0.54	6.27 ± 0.6	0.103118	6.27 ± 0.6	5.75 ± 0.9
cg26074201	LOC100506083;DDX19A;DDX19A	0.0001414	5.41 ± 0.5	6.17 ± 0.55	0.0203416	6.17 ± 0.55	5.3 ± 0.94
cg10344369	Intergenic	0.0001442	91.38 ± 0.89	92.48 ± 0.87	0.286568	92.48 ± 0.87	91.76 ± 1.56
cg18778608	MRPL54;APBA3	0.0001456	3.51 ± 0.43	4.02 ± 0.54	0.355369	4.02 ± 0.54	4.42 ± 0.82
cg20944647	Intergenic	0.0001479	24.8 ± 1.94	28.69 ± 1.41	0.401776	28.69 ± 1.41	28.09 ± 1.5
cg24804436	PPP2R5D;PPP2R5D;PPP2R5D	0.0001487	93.52 ± 1.12	95.66 ± 0.53	0.007182	95.66 ± 0.53	94.23 ± 0.58
cg21692752	Intergenic	0.0001488	83.64 ± 0.74	85.9 ± 0.72	0.398507	85.9 ± 0.72	86.79 ± 2.83
cg08544209	SFTA1P	0.0001538	88.88 ± 4.01	95.25 ± 1.31	0.0135672	95.25 ± 1.31	92.26 ± 1.85
cg06183123	Intergenic	0.0001565	46.15 ± 1.71	49.12 ± 1.3	0.0495113	49.12 ± 1.3	46.87 ± 1.65
cg15239238	Intergenic	0.0001579	10.38 ± 1.92	14.64 ± 2.39	0.29241	14.64 ± 2.39	13.09 ± 1.9
cg14338803	NFKB1;NFKB1	0.0001593	90.95 ± 1.48	88.51 ± 2.24	0.209247	88.51 ± 2.24	89.84 ± 2.39
cg13564667	TARBP1	0.0001607	14.03 ± 2.23	18.04 ± 2.75	0.0517983	18.04 ± 2.75	16.31 ± 3.76
cg23300488	Intergenic	0.0001607	3.51 ± 0.49	3 ± 0.47	0.0991595	3 ± 0.47	3.69 ± 0.56
cg01842276	KCNQ3;KCNQ3	0.0001611	77.45 ± 3.02	73.04 ± 2.71	0.0793254	73.04 ± 2.71	76.32 ± 4.3
cg26846391	Intergenic	0.0001703	78.25 ± 1.68	81.74 ± 1.19	0.844576	81.74 ± 1.19	81.42 ± 2.21
cg19595143	PPP2R1A;PPP2R1A	0.0001734	66.55 ± 1.87	67.59 ± 1.84	0.0338874	67.59 ± 1.84	66.22 ± 1.98
cg21949397	HSPBAP1	0.0001755	53.13 ± 1.27	60.08 ± 1.84	0.170261	60.08 ± 1.84	58.4 ± 2.04
cg13986762	MOSC1	0.0001776	3.33 ± 0.43	4.1 ± 0.66	0.964653	4.1 ± 0.66	4.12 ± 0.7
cg08523625	PRRX2	0.000179	3.75 ± 0.59	4.79 ± 0.61	0.47785	4.79 ± 0.61	5.06 ± 0.53
cg13254934	SPON1	0.0001795	93.22 ± 0.83	91.83 ± 1.33	0.211614	91.83 ± 1.33	90.2 ± 2.13
cg04438374	Intergenic	0.0001805	22.36 ± 3.62	18.75 ± 2.89	0.866851	18.75 ± 2.89	20.23 ± 7.4
cg01708636	CPE	0.0001821	10.94 ± 2.59	16.08 ± 4.03	0.498499	16.08 ± 4.03	14.82 ± 4.31
cg14167033	SHANK2;SHANK2	0.0001825	45.01 ± 2.1	48.67 ± 1.72	0.0596909	48.67 ± 1.72	47.04 ± 1.36
cg04040483	CHMP6	0.0001832	6.61 ± 0.77	7.43 ± 0.88	0.111966	7.43 ± 0.88	6.64 ± 0.69
cg26770275	INPP5J;INPP5J;INPP5J;INPP5J;INPP5J;INPP5J	0.0001851	77.05 ± 1.7	79.93 ± 1.37	0.893763	79.93 ± 1.37	80.04 ± 1.48
cg26353176	PART1;PART1;PDE4D;PART1;PDE4D	0.0001885	10.06 ± 1.23	11.05 ± 1.28	0.0919972	11.05 ± 1.28	9.99 ± 2.13
cg09077862	Intergenic	0.0001904	2.94 ± 0.41	3.8 ± 0.42	0.0364051	3.8 ± 0.42	3.2 ± 0.46
cg22033189	SNHG12;SNORA16A	0.0001927	4.53 ± 1.09	4.08 ± 0.93	0.0180605	4.08 ± 0.93	5 ± 0.71
cg27276924	FAM155A	0.0001948	92.15 ± 2.02	94.76 ± 1.75	0.571508	94.76 ± 1.75	94.34 ± 1.14
cg18217459	Intergenic	0.0001955	46.33 ± 2.41	50.27 ± 2.96	0.127695	50.27 ± 2.96	47.75 ± 1.06
cg17768135	ARIH2	0.0001981	78.57 ± 1.17	77.4 ± 1.26	0.709892	77.4 ± 1.26	77.78 ± 1.86
cg19730699	Intergenic	0.0002	58.88 ± 1.15	61.15 ± 1.34	0.0504049	61.15 ± 1.34	58.86 ± 2.51
cg17407732	NEK4;NEK4	0.0002002	94.73 ± 0.45	92.57 ± 0.93	0.0318713	92.57 ± 0.93	93.37 ± 0.88
cg18436249	Intergenic	0.0002003	11.2 ± 0.85	13.22 ± 1.2	0.244589	13.22 ± 1.2	12.11 ± 1.24
cg13422275	Intergenic	0.0002015	87.72 ± 1.49	91.03 ± 0.7	0.0029951	91.03 ± 0.7	88.99 ± 0.72
cg04080733	EIF4G1;EIF4G1;EIF4G1;EIF4G1;EIF4G1	0.0002033	79.89 ± 1.71	83.75 ± 1.34	0.117695	83.75 ± 1.34	82.07 ± 2.53
cg11144990	CCDC53	0.0002048	7.22 ± 0.85	8.6 ± 0.85	0.0210726	8.6 ± 0.85	7.51 ± 0.9
cg03237845	TCF12;TCF12;TCF12;TCF12	0.0002068	13 ± 1.84	17.17 ± 2.23	0.074845	17.17 ± 2.23	14.31 ± 3.88
cg15432410	CACNA1B;CACNA1B	0.0002131	89.75 ± 0.98	91.35 ± 0.66	0.106548	91.35 ± 0.66	90.3 ± 1.15
cg12091708	PCDHA11;PCDHA11;PCDHA11;PCDHA11;PCDHA1;PCDHA1;PCDHA2;PCDHA3;PCDHA4;PCDHA5;PCDHA6;PCDHA6;PCDHA7;PCDHA8;PCDHA9;PCDHA10;PCDHA10	0.000216	39.91 ± 3.53	42.76 ± 3.81	0.0821068	42.76 ± 3.81	41.33 ± 4.67
cg09184842	SPG20;SPG20;SPG20;SPG20	0.0002177	2.76 ± 0.31	3.23 ± 0.37	0.0640001	3.23 ± 0.37	2.84 ± 0.21
cg11380830	NOC3L	0.0002178	7.23 ± 1.6	8.36 ± 1.87	0.440648	8.36 ± 1.87	7.86 ± 1.89
cg10359080	C5orf66	0.0002217	55.87 ± 2.76	57.94 ± 2.63	0.581941	57.94 ± 2.63	57.56 ± 2.96
cg13098379	NFASC;NFASC;NFASC;NFASC;NFASC	0.0002225	93.46 ± 0.8	94.72 ± 0.48	0.539458	94.72 ± 0.48	94.87 ± 0.91
cg25694025	ABI3BP	0.0002226	4.02 ± 0.54	4.65 ± 0.67	0.0381657	4.65 ± 0.67	3.86 ± 0.44
cg02600974	GOLM1;GOLM1	0.0002227	10.92 ± 1.06	16.06 ± 1.39	0.126707	16.06 ± 1.39	14.65 ± 0.8
cg07615408	GNPTAB	0.0002228	91.6 ± 1.32	93.63 ± 0.84	0.424529	93.63 ± 0.84	93.21 ± 1.08
cg19172665	FREM3	0.0002228	4.64 ± 0.68	5.32 ± 0.69	0.925207	5.32 ± 0.69	5.28 ± 0.61
cg22055860	PAGR1;MVP;MVP;MVP;MVP	0.0002229	51.33 ± 1.68	52.71 ± 1.45	0.539429	52.71 ± 1.45	52.09 ± 3
cg00991639	SYBU;SYBU;SYBU;SYBU;SYBU;SYBU;SYBU;SYBU;SYBU;SYBU;SYBU;SYBU;SYBU;SYBU;SYBU	0.0002232	69.9 ± 1.34	67.29 ± 1.39	0.262828	67.29 ± 1.39	68.87 ± 2.54
cg19916659	MIR548N	0.0002269	25.48 ± 5.65	20.76 ± 4.75	0.606197	20.76 ± 4.75	19.79 ± 3.15
cg23858558	SDC2	0.0002275	8.06 ± 1.5	9.79 ± 2.03	0.286887	9.79 ± 2.03	8.51 ± 1.93
cg10597099	TMEM232	0.000229	4.43 ± 0.51	5.56 ± 0.81	0.569847	5.56 ± 0.81	5.29 ± 1.07
cg09270866	Intergenic	0.0002298	3.63 ± 0.39	3.07 ± 0.41	0.317468	3.07 ± 0.41	3.36 ± 0.53
cg21929781	MMEL1	0.0002305	27.29 ± 0.69	28.67 ± 0.61	0.0101626	28.67 ± 0.61	27.39 ± 0.74
cg22091828	RPA1	0.0002316	17.8 ± 2.21	22.64 ± 2.98	0.0927111	22.64 ± 2.98	19.3 ± 2.07
cg09449490	ROCK1	0.0002336	3.63 ± 0.39	5.13 ± 0.34	0.271039	5.13 ± 0.34	4.79 ± 0.93
cg27442047	TNXB	0.0002344	57.34 ± 1.46	60.3 ± 1.36	0.559006	60.3 ± 1.36	60.02 ± 0.96
cg08384110	ZNF136	0.0002369	87.46 ± 2.76	84.58 ± 3.1	0.284006	84.58 ± 3.1	85.34 ± 2.16
cg22043275	EXOC6B	0.0002371	90.8 ± 1.2	89.56 ± 1.03	0.537113	89.56 ± 1.03	89.89 ± 1.08
cg17483423	IQSEC2	0.0002374	43.77 ± 3.67	46.79 ± 4.02	0.0141035	46.79 ± 4.02	44.7 ± 4.81
cg05096017	UNC45A;UNC45A;UNC45A	0.0002392	6.48 ± 1.04	4.65 ± 0.69	0.422533	4.65 ± 0.69	5.11 ± 0.89
cg06474050	MTHFD2L	0.0002399	88.87 ± 1.41	86.61 ± 1.7	0.294131	86.61 ± 1.7	87.81 ± 1.37
cg26988800	METT10D;METT10D	0.0002399	5.09 ± 0.99	3.99 ± 0.73	0.860968	3.99 ± 0.73	3.88 ± 0.22
cg26333652	IRX2;IRX2	0.00024	6.74 ± 0.78	5.87 ± 0.79	0.0390182	5.87 ± 0.79	6.53 ± 0.76
cg02114082	Intergenic	0.0002422	6.59 ± 1.26	5.57 ± 1.13	0.201827	5.57 ± 1.13	6.3 ± 1.11
cg19026128	Intergenic	0.0002429	10.19 ± 0.56	11.91 ± 0.81	0.251311	11.91 ± 0.81	11.22 ± 1.63
cg15894683	Intergenic	0.0002486	88.84 ± 3.68	93.17 ± 3.05	0.433324	93.17 ± 3.05	94.6 ± 1.06
cg12278526	KAT6B;KAT6B;KAT6B	0.0002517	89.96 ± 0.91	91.67 ± 1.1	0.366002	91.67 ± 1.1	91.41 ± 1.37
cg26586813	MTUS2	0.000253	89.89 ± 1.68	86.25 ± 1.73	0.0180544	86.25 ± 1.73	87.63 ± 1.52
cg00025278	ABCC8;ABCC8	0.0002538	91.08 ± 0.4	89.39 ± 0.38	0.013659	89.39 ± 0.38	90.74 ± 0.8
cg02712224	TBX5;TBX5;TBX5;TBX5	0.0002573	6.51 ± 0.66	7.47 ± 0.62	0.188003	7.47 ± 0.62	6.95 ± 0.73
cg13939745	CRYGD;LOC100507443	0.0002581	52.93 ± 2.21	55.38 ± 1.93	0.456295	55.38 ± 1.93	54.91 ± 1.18
cg16434868	POM121L2	0.0002581	13.83 ± 2.11	11.16 ± 1.25	0.433106	11.16 ± 1.25	11.81 ± 1.1
cg19350125	ANP32A	0.0002592	3.16 ± 0.52	2.82 ± 0.49	0.579249	2.82 ± 0.49	3 ± 0.4
cg02936831	FCHSD2	0.0002612	93.35 ± 1.03	91.23 ± 1.39	0.0224042	91.23 ± 1.39	94.05 ± 1.63
cg19862964	Intergenic	0.0002643	5.76 ± 0.58	7.26 ± 0.92	0.0589264	7.26 ± 0.92	6.14 ± 0.3
cg00973424	Intergenic	0.000265	91.51 ± 1.57	93.61 ± 1.01	0.225772	93.61 ± 1.01	92.06 ± 2.12
cg02966448	CPEB4;CPEB4;CPEB4;CPEB4;CPEB4	0.0002685	6.82 ± 1.42	10.03 ± 1.61	0.198868	10.03 ± 1.61	8.76 ± 0.74
cg05650458	ARF1;ARF1;ARF1;ARF1	0.0002694	9.54 ± 0.74	8.12 ± 0.76	0.024653	8.12 ± 0.76	10.59 ± 1.83
cg13327565	IGF2BP1;IGF2BP1	0.0002701	4.62 ± 0.47	3.71 ± 0.45	0.347218	3.71 ± 0.45	3.86 ± 0.67
cg08266092	ZNF132	0.0002706	88.76 ± 2.32	91.05 ± 1.75	0.600993	91.05 ± 1.75	90.55 ± 2.11
cg01575614	DNAJC7;DNAJC7;DNAJC7;DNAJC7;NKIRAS2	0.0002714	5.06 ± 0.42	4.61 ± 0.31	0.443737	4.61 ± 0.31	4.72 ± 0.19
cg27664795	Intergenic	0.0002717	42.75 ± 2.03	45.5 ± 1.86	0.466054	45.5 ± 1.86	44.88 ± 1.56
cg14799538	Intergenic	0.0002725	81.18 ± 1.23	83.56 ± 1.3	0.10507	83.56 ± 1.3	82.14 ± 0.96
cg07175120	USP19;USP19;USP19;USP19	0.0002731	4.72 ± 0.4	3.82 ± 0.46	0.656848	3.82 ± 0.46	4.02 ± 0.58
cg09248655	GRIN2D	0.0002743	8.85 ± 0.82	8.08 ± 0.68	0.0370927	8.08 ± 0.68	8.94 ± 0.55
cg15438703	DZIP1;DZIP1	0.0002745	52.33 ± 1.56	55.84 ± 1.36	0.286827	55.84 ± 1.36	55.1 ± 1.31
cg02570079	Intergenic	0.0002757	84.45 ± 2.59	86.37 ± 2.46	0.0486587	86.37 ± 2.46	84.49 ± 1.14
cg07783220	NGDN;NGDN	0.0002761	89.01 ± 2.19	91.44 ± 1.89	0.566949	91.44 ± 1.89	90.84 ± 1.48
cg05099692	Intergenic	0.0002769	47.52 ± 1.41	50.35 ± 0.99	0.0664476	50.35 ± 0.99	48.88 ± 1.44
cg08072933	PPP1R2P1	0.000278	81.08 ± 2.21	83.93 ± 1.54	0.575108	83.93 ± 1.54	84.6 ± 4.4
cg04522714	ZER1	0.0002791	6.8 ± 0.74	5.91 ± 0.48	0.657378	5.91 ± 0.48	6.05 ± 0.67
cg23953110	Intergenic	0.0002793	7.74 ± 0.91	7.05 ± 0.78	0.884671	7.05 ± 0.78	7.17 ± 1.14
cg00747283	Intergenic	0.0002826	94.5 ± 1.47	92.97 ± 1.46	0.171614	92.97 ± 1.46	94.17 ± 1.45
cg11283476	NLRP2;NLRP2;NLRP2;NLRP2	0.0002856	4.65 ± 0.93	6.18 ± 1.28	0.002306	6.18 ± 1.28	4.13 ± 0.62
cg04000244	Intergenic	0.0002862	2.69 ± 0.27	3.55 ± 0.27	0.0219689	3.55 ± 0.27	3.15 ± 0.29
cg15758463	Intergenic	0.0002885	50.95 ± 2.68	53.01 ± 2.31	0.340291	53.01 ± 2.31	52.48 ± 2.51
cg02927669	Intergenic	0.0002886	82.14 ± 1.6	84.55 ± 1.16	0.822275	84.55 ± 1.16	84.24 ± 1.82
cg09400607	Intergenic	0.0002902	52.64 ± 1.64	55.03 ± 1.52	0.0934574	55.03 ± 1.52	53.92 ± 1.31
cg09601584	LOC404266;LOC404266;LOC404266;LOC404266;HOXB6;LOC404266	0.0002905	6.87 ± 0.24	7.52 ± 0.24	0.0721416	7.52 ± 0.24	6.94 ± 0.65
cg10622174	Intergenic	0.0002913	10.08 ± 1.23	11.33 ± 1.47	0.364976	11.33 ± 1.47	10.63 ± 1.9
cg09649006	PPP1R7;PPP1R7;PPP1R7;PPP1R7;PPP1R7;PPP1R7;PPP1R7;PPP1R7;PASK;PASK;PASK;PASK;PASK;PPP1R7;PPP1R7;PPP1R7	0.0002919	4.87 ± 0.68	3.77 ± 0.53	0.0066961	3.77 ± 0.53	4.46 ± 0.65
cg09688014	Intergenic	0.0002944	38.71 ± 5.5	41.39 ± 5.79	0.483339	41.39 ± 5.79	42.6 ± 5.98
cg01401676	LINC01547;LINC01547;FAM207A	0.0002961	5.29 ± 0.73	6.14 ± 0.94	0.408129	6.14 ± 0.94	5.87 ± 1.02
cg23970798	ZNF2;ZNF2;ZNF2;ZNF2	0.0002983	6.48 ± 0.95	4.45 ± 0.57	0.540627	4.45 ± 0.57	4.85 ± 1.17
cg08310756	WWOX;WWOX	0.0003023	92.29 ± 0.74	94.49 ± 0.58	0.141439	94.49 ± 0.58	93.31 ± 1.46
cg00240054	Intergenic	0.0003032	15.23 ± 2.22	20.55 ± 2.75	0.200123	20.55 ± 2.75	18.37 ± 1.95
cg17799982	DLG2;DLG2;DLG2;DLG2;DLG2	0.0003049	91.65 ± 1.28	94.33 ± 0.9	0.0061592	94.33 ± 0.9	92.17 ± 1.08
cg17351974	RPL37	0.0003064	4.2 ± 0.57	3.06 ± 0.26	0.885774	3.06 ± 0.26	3.13 ± 0.59
cg08946618	GLB1L2	0.0003116	94.69 ± 1.78	97.23 ± 0.68	0.340896	97.23 ± 0.68	96.57 ± 1.11
cg00372132	FRYL	0.0003141	90.34 ± 2.13	88.4 ± 2.06	0.0242603	88.4 ± 2.06	90.19 ± 3.07
cg14078435	Intergenic	0.0003161	66.34 ± 1.86	69.02 ± 1.74	0.236395	69.02 ± 1.74	67.53 ± 2.26
cg10664784	ANKFY1	0.0003166	64.04 ± 2.29	68 ± 2.26	0.635509	68 ± 2.26	67.42 ± 1.58
cg14165978	HPCAL4	0.0003168	50.25 ± 1.67	54.07 ± 1.52	0.0374837	54.07 ± 1.52	50.52 ± 2.61
cg18349668	ZNF788	0.000317	44.13 ± 2.75	46.44 ± 3.15	0.0816938	46.44 ± 3.15	44.17 ± 1.79
cg25913642	C10orf76	0.0003171	93.9 ± 0.61	95.71 ± 0.69	0.524648	95.71 ± 0.69	95.23 ± 1.51
cg10697784	GNPTAB	0.0003176	89.94 ± 1.89	92.5 ± 1.53	0.835008	92.5 ± 1.53	91.7 ± 3.35
cg06757466	FSTL5;FSTL5;FSTL5	0.000318	2.51 ± 0.42	3.03 ± 0.43	0.435559	3.03 ± 0.43	3.44 ± 0.84
cg21058987	L2HGDH;L2HGDH;ATP5S;ATP5S;ATP5S	0.0003202	4.9 ± 0.63	6.34 ± 0.92	0.645187	6.34 ± 0.92	6.19 ± 1.93
cg15779600	AIFM2	0.000321	4.81 ± 0.86	5.79 ± 1	0.841061	5.79 ± 1	5.78 ± 1.49
cg14028967	Intergenic	0.0003231	62.58 ± 6.83	56.56 ± 5.5	0.629293	56.56 ± 5.5	57.94 ± 3.37
cg22179172	Intergenic	0.0003241	91.32 ± 0.94	92.23 ± 0.98	0.902751	92.23 ± 0.98	92.11 ± 1.31
cg02859438	UBAP1;UBAP1;UBAP1;UBAP1;UBAP1;UBAP1	0.0003243	94.42 ± 0.9	92.02 ± 1.92	0.549123	92.02 ± 1.92	92.64 ± 2.43
cg26134751	TSC22D2	0.0003246	88.87 ± 3.15	90.84 ± 2.22	0.607611	90.84 ± 2.22	91.46 ± 1.46
cg09642740	Intergenic	0.0003281	31.48 ± 2.96	34.18 ± 3	0.110199	34.18 ± 3	33 ± 3.45
cg27619646	ANK1;ANK1;ANK1;ANK1;ANK1	0.0003305	87.05 ± 1.37	88.68 ± 1.57	0.158541	88.68 ± 1.57	87.66 ± 0.45
cg04964416	PDCD11;USMG5	0.000331	3.59 ± 0.41	4.5 ± 0.53	0.784094	4.5 ± 0.53	4.78 ± 1.45
cg04594694	SHANK3	0.0003315	69.69 ± 2.35	67.75 ± 2.65	0.736072	67.75 ± 2.65	67.33 ± 1.98
cg25378865	LINC01133	0.0003326	90.67 ± 1.62	88 ± 1.85	0.627785	88 ± 1.85	87.42 ± 2.08
cg18414238	HCN1	0.000333	67.29 ± 5.36	69.55 ± 5.14	0.803992	69.55 ± 5.14	69.22 ± 3.48
cg16689634	CYP4X1	0.0003332	7.93 ± 0.44	7.27 ± 0.44	0.945462	7.27 ± 0.44	7.38 ± 1.25
cg07806043	Intergenic	0.000335	44.77 ± 3.52	50.81 ± 4.3	0.983724	50.81 ± 4.3	50.77 ± 2.25
cg08155116	BAIAP2;BAIAP2;BAIAP2;BAIAP2	0.0003372	86.15 ± 0.96	86.89 ± 0.95	0.69396	86.89 ± 0.95	86.61 ± 0.83
cg09717100	Intergenic	0.0003397	7.56 ± 0.72	10.15 ± 1.3	0.114223	10.15 ± 1.3	8.69 ± 1.67
cg13250378	Intergenic	0.0003397	30.45 ± 1.68	33.16 ± 2.12	0.695446	33.16 ± 2.12	32.95 ± 2.9
cg11245233	SNORD45C;RABGGTB;RABGGTB	0.000341	8.95 ± 1.23	7.11 ± 0.81	0.0318542	7.11 ± 0.81	8.65 ± 0.84
cg19978540	Intergenic	0.0003433	6.82 ± 0.95	7.89 ± 0.97	0.176893	7.89 ± 0.97	7.24 ± 1.66
cg08368123	Intergenic	0.0003448	92.09 ± 0.93	90.29 ± 0.95	0.331617	90.29 ± 0.95	91.15 ± 1.38
cg13535626	ZNF876P	0.0003456	3.47 ± 0.58	4.87 ± 0.66	0.0331652	4.87 ± 0.66	3.61 ± 0.61
cg08318469	SGCD;SGCD;SGCD	0.0003461	93.17 ± 3.12	96.28 ± 1.08	0.0700995	96.28 ± 1.08	95.31 ± 1.15
cg10151685	Intergenic	0.0003476	9.53 ± 0.8	11.01 ± 1.29	0.723843	11.01 ± 1.29	11.17 ± 1.35
cg01631409	TADA2A;TADA2A;TADA2A;TADA2A	0.000348	95.06 ± 0.46	93.89 ± 0.69	0.0100793	93.89 ± 0.69	95.24 ± 1.06
cg08963419	ICAM5	0.000348	7.54 ± 0.44	6.44 ± 0.49	0.476564	6.44 ± 0.49	6.74 ± 0.7
cg00914028	Intergenic	0.0003493	82.76 ± 2.15	85.28 ± 2.16	0.776677	85.28 ± 2.16	85.7 ± 2.07
cg20025656	ACTA1	0.0003505	85.75 ± 2.34	88.32 ± 1.76	0.61342	88.32 ± 1.76	87.74 ± 1.84
cg22557240	Intergenic	0.0003548	8.19 ± 0.82	7.12 ± 0.64	0.383008	7.12 ± 0.64	7.56 ± 0.86
cg14460564	SIGMAR1;SIGMAR1	0.0003558	6.39 ± 0.57	5.99 ± 0.61	0.834183	5.99 ± 0.61	6.08 ± 0.77
cg02499669	RXFP2;RXFP2	0.0003569	7.5 ± 0.56	9.91 ± 0.86	0.0854844	9.91 ± 0.86	8.15 ± 1.86
cg04224041	CTBP1;CTBP1	0.0003597	91.79 ± 0.83	93.37 ± 0.8	0.389067	93.37 ± 0.8	93.14 ± 0.84
cg27096572	C18orf62	0.0003633	82.52 ± 3.29	86.87 ± 2.7	0.907176	86.87 ± 2.7	86.85 ± 3.47
cg04703974	SYNRG;SYNRG;SYNRG;SYNRG;SYNRG;SYNRG;SYNRG	0.0003635	92.33 ± 1.62	94.17 ± 1.11	0.549868	94.17 ± 1.11	93.82 ± 0.75
cg14395634	CFL1	0.0003647	2.91 ± 0.52	3.14 ± 0.53	0.791598	3.14 ± 0.53	3.03 ± 0.34
cg20141969	ATP8B4;ATP8B4;ATP8B4;ATP8B4	0.0003678	89.58 ± 1.66	91.66 ± 1.05	0.948734	91.66 ± 1.05	91.62 ± 1.74
cg12522729	INHBA-AS1	0.0003684	54.59 ± 1.15	57.21 ± 1.01	0.308979	57.21 ± 1.01	55.95 ± 2.69
cg26576597	UTAT33	0.0003689	62.33 ± 2.52	64.82 ± 2.45	0.496677	64.82 ± 2.45	63.62 ± 3.3
cg03876096	Intergenic	0.000369	96.4 ± 0.6	94.08 ± 0.76	0.278294	94.08 ± 0.76	94.9 ± 1.37
cg08276355	Intergenic	0.00037	91.51 ± 1.31	94.02 ± 0.49	0.490723	94.02 ± 0.49	93.56 ± 1.36
cg12379048	Intergenic	0.0003718	48.17 ± 1.31	50.22 ± 1.53	0.0550649	50.22 ± 1.53	48.18 ± 0.82
cg15657055	ADCY3;ADCY3	0.0003754	88.95 ± 0.55	90.08 ± 0.59	0.121277	90.08 ± 0.59	89.51 ± 0.37
cg02207086	Intergenic	0.0003757	84.48 ± 1.6	85.73 ± 1.56	0.220287	85.73 ± 1.56	84.87 ± 2.29
cg04569082	Intergenic	0.0003778	6.13 ± 0.81	6.64 ± 0.97	0.497872	6.64 ± 0.97	6.41 ± 0.96
cg11300186	CTCFL;CTCFL;CTCFL;CTCFL;CTCFL;CTCFL;CTCFL;CTCFL;CTCFL;CTCFL	0.0003787	24.14 ± 1.26	26.39 ± 0.8	0.0569891	26.39 ± 0.8	25.41 ± 1.6
cg05026403	C10orf10;RASSF4	0.0003798	79.26 ± 1.58	82.34 ± 1.39	0.985102	82.34 ± 1.39	82.2 ± 3.03
cg08151654	GANAB;GANAB	0.000381	88.31 ± 1.18	89.96 ± 1.06	0.577649	89.96 ± 1.06	89.56 ± 1.48
cg16893868	LILRA2;LILRA2	0.0003819	6.03 ± 1.09	7.98 ± 1.05	0.359211	7.98 ± 1.05	7.3 ± 1.01
cg26571157	Intergenic	0.0003849	68.95 ± 1.96	71.49 ± 1.97	0.0387852	71.49 ± 1.97	69.27 ± 2.3
cg04193615	Intergenic	0.0003868	90.8 ± 0.94	93.53 ± 1.16	0.780559	93.53 ± 1.16	93.15 ± 1.95
cg18817607	SORBS1;SORBS1;SORBS1;SORBS1;SORBS1;SORBS1;SORBS1	0.0003885	82.34 ± 1.75	83.92 ± 1.82	0.846532	83.92 ± 1.82	84.2 ± 1.12
cg02433785	RALA	0.0003888	16.68 ± 2.1	13.58 ± 1.7	0.984735	13.58 ± 1.7	14.37 ± 5.98
cg26142690	LRP8;LRP8;LRP8;LRP8	0.0003907	71.35 ± 1.97	73.96 ± 1.93	0.0527116	73.96 ± 1.93	71.82 ± 0.69
cg08262534	Intergenic	0.0003914	76.92 ± 3.01	79.45 ± 3.35	0.160744	79.45 ± 3.35	77.67 ± 1.98
cg27196999	YTHDC1;YTHDC1	0.0003925	40.07 ± 1.86	40.87 ± 1.76	0.0557254	40.87 ± 1.76	39.76 ± 2.2
cg27134816	FGF14;FGF14	0.0003939	7.65 ± 0.74	9.35 ± 0.92	0.438655	9.35 ± 0.92	8.82 ± 2.02
cg16582836	CAMTA1	0.0003972	92.8 ± 1.26	87.83 ± 1.92	0.0766879	87.83 ± 1.92	90.7 ± 1.72
cg09464466	Intergenic	0.0003974	73.84 ± 1.74	75.84 ± 1.45	0.4238	75.84 ± 1.45	74.73 ± 2.78
cg25962889	LOC100133286	0.0003997	7.17 ± 1.39	9.41 ± 1.89	0.0436072	9.41 ± 1.89	7.28 ± 0.94
cg17741106	RDH14	0.0004005	4.61 ± 0.15	3.66 ± 0.31	0.0185665	3.66 ± 0.31	4.11 ± 0.27
cg19861129	LINC00371;LINC00371	0.0004007	59.37 ± 1.44	61.18 ± 1.34	0.0243333	61.18 ± 1.34	60.1 ± 1.44
cg26005578	RASSF10	0.0004018	5.97 ± 0.55	4.37 ± 0.33	0.915642	4.37 ± 0.33	4.53 ± 1.69
cg12487464	THRA;THRA	0.000402	5.06 ± 0.6	4.72 ± 0.63	0.0550796	4.72 ± 0.63	3.9 ± 0.43
cg05444140	MBNL2;MBNL2;MBNL2	0.0004022	95.14 ± 1.32	96.7 ± 1.14	0.682093	96.7 ± 1.14	96.45 ± 0.98
cg03123660	Intergenic	0.0004037	84.15 ± 1.7	86.63 ± 1.48	0.257463	86.63 ± 1.48	85.76 ± 1.65
cg27196131	Intergenic	0.0004049	90.16 ± 2.39	92.27 ± 1.9	0.316028	92.27 ± 1.9	91.75 ± 1.95
cg10010004	KCTD19;LRRC36	0.0004098	44.24 ± 1.27	48.22 ± 1.77	0.719488	48.22 ± 1.77	48.73 ± 3
cg13704030	AGPAT9;AGPAT9;AGPAT9	0.0004112	94.36 ± 0.91	95.5 ± 0.65	0.772526	95.5 ± 0.65	95.63 ± 0.92
cg03567117	NR4A1;NR4A1	0.0004128	73.63 ± 2.18	75.34 ± 2.2	0.557412	75.34 ± 2.2	76.07 ± 1.73
cg06006665	DIP2C	0.0004153	86.9 ± 2.22	90.26 ± 1.6	0.0039374	90.26 ± 1.6	83.55 ± 3.3
cg17830299	COL13A1;COL13A1;COL13A1;COL13A1;COL13A1;COL13A1	0.0004166	50.78 ± 1	52.62 ± 1.3	0.22927	52.62 ± 1.3	51.66 ± 1.34
cg12523770	Intergenic	0.0004171	88.71 ± 1.67	86.65 ± 1.67	0.530914	86.65 ± 1.67	87.49 ± 1.6
cg07277038	LRRC33	0.0004178	84.93 ± 0.73	86.85 ± 0.89	0.377323	86.85 ± 0.89	86.07 ± 1.64
cg04645316	Intergenic	0.0004197	87.76 ± 1.46	89.96 ± 1.37	0.0041206	89.96 ± 1.37	87.71 ± 2.29
cg10033663	CLYBL-AS1;CLYBL-AS1;CLYBL-AS1;CLYBL;CLYBL	0.00042	74.71 ± 2.63	69.83 ± 2.9	0.054168	69.83 ± 2.9	72.9 ± 2.39
cg02384491	NOS1AP;NOS1AP	0.0004203	21.87 ± 2.09	25.48 ± 2.68	0.223926	25.48 ± 2.68	23.57 ± 2.67
cg19405222	Intergenic	0.0004205	49.19 ± 1.29	51.66 ± 1.65	0.0217604	51.66 ± 1.65	48.43 ± 2.58
cg21980394	PARK2;PARK2;PARK2	0.0004213	6.4 ± 0.45	5.03 ± 0.53	0.0086232	5.03 ± 0.53	6.15 ± 0.42
cg27336068	ADARB2	0.0004237	73.32 ± 1.18	76.26 ± 1.44	0.068975	76.26 ± 1.44	73.67 ± 2.34
cg24285270	DENND4A;DENND4A	0.0004253	86.04 ± 2.71	90.46 ± 1.84	0.506933	90.46 ± 1.84	90.72 ± 4.03
cg13393001	Intergenic	0.000426	44.3 ± 2.06	47.76 ± 2.66	0.415168	47.76 ± 2.66	46.68 ± 2.33
cg17015650	LINC01571	0.0004271	87.81 ± 2.26	86.04 ± 2.5	0.0658471	86.04 ± 2.5	87.73 ± 2.44
cg01085837	Intergenic	0.0004275	36.36 ± 5.19	33.96 ± 5.04	0.275313	33.96 ± 5.04	34.93 ± 5.2
cg04338556	TRPM1	0.0004289	41.29 ± 1.83	43.29 ± 1.38	0.0045135	43.29 ± 1.38	41.08 ± 1.04
cg14733053	Intergenic	0.0004305	90.2 ± 1.75	92.27 ± 1.04	0.0550818	92.27 ± 1.04	91.19 ± 0.58
cg26453169	GAPT	0.0004313	81.89 ± 1.92	84.09 ± 1.27	0.0337677	84.09 ± 1.27	81.87 ± 2.62
cg01182310	RANBP17	0.0004324	83.25 ± 2.89	86.6 ± 2.77	0.0251185	86.6 ± 2.77	82.53 ± 3.08
cg18824434	INTS3	0.0004326	46.93 ± 1.23	48.24 ± 1.1	0.616464	48.24 ± 1.1	47.91 ± 0.84
cg25175108	PRRT4;PRRT4	0.0004336	58.25 ± 2.44	60.16 ± 2.61	0.694198	60.16 ± 2.61	59.68 ± 2
cg24399337	LOC84856	0.0004343	4.75 ± 0.54	4.03 ± 0.35	0.76036	4.03 ± 0.35	4.13 ± 0.67
cg25213546	SH3GL3;SH3GL3	0.0004394	8.97 ± 1.17	11.01 ± 1.46	0.84509	11.01 ± 1.46	11.51 ± 3.29
cg01056945	RHOQ	0.000443	5.35 ± 0.5	6.63 ± 0.72	0.127854	6.63 ± 0.72	5.99 ± 0.57
cg24324379	IDH1;IDH1	0.0004435	4.27 ± 0.39	5.15 ± 0.54	0.172878	5.15 ± 0.54	4.49 ± 0.53
cg16306821	Intergenic	0.0004439	78.8 ± 5.34	73.73 ± 6.78	0.521323	73.73 ± 6.78	74.99 ± 9.26
cg24107142	HK2;HK2	0.0004444	30.27 ± 0.54	33.42 ± 1.01	0.182619	33.42 ± 1.01	31.66 ± 2.59
cg23725210	MYT1L	0.0004463	84.17 ± 1.59	86.1 ± 1.21	0.849328	86.1 ± 1.21	86.22 ± 1.71
cg00914121	MMP16	0.0004486	80.49 ± 2.57	83.75 ± 2.63	0.594483	83.75 ± 2.63	83.02 ± 1.58
cg06442563	MAML3	0.0004493	89.88 ± 1.52	92.79 ± 0.93	0.034394	92.79 ± 0.93	91.23 ± 1.68
cg19965949	Intergenic	0.0004499	93.92 ± 1.43	91.8 ± 1.43	0.899334	91.8 ± 1.43	91.88 ± 1.58
cg04302388	SLC45A2;SLC45A2	0.0004526	62.25 ± 3.47	64.15 ± 3.18	0.0152873	64.15 ± 3.18	62.81 ± 2.94
cg10716641	Intergenic	0.0004538	15.5 ± 1.23	18 ± 0.91	0.0824333	18 ± 0.91	15.54 ± 2.33
cg03536320	INADL	0.0004556	94.86 ± 1.08	95.97 ± 0.81	0.476173	95.97 ± 0.81	95.17 ± 1.68
cg13921903	Intergenic	0.0004582	23.71 ± 1.32	25.64 ± 1.27	0.0232227	25.64 ± 1.27	23.61 ± 1.31
cg04225347	PSMD13;SIRT3;PSMD13;SIRT3	0.0004587	4.57 ± 0.87	3.72 ± 0.8	0.152287	3.72 ± 0.8	4.16 ± 0.74
cg03656498	SLC22A17;SLC22A17;SLC22A17;SLC22A17	0.0004616	4.36 ± 0.6	5.61 ± 0.75	0.0187188	5.61 ± 0.75	4.51 ± 0.4
cg15544004	Intergenic	0.0004639	15.7 ± 1.75	18.74 ± 1.64	0.127586	18.74 ± 1.64	17.51 ± 2.58
cg01013336	SRBD1	0.0004657	93.74 ± 0.69	95.51 ± 0.78	0.10645	95.51 ± 0.78	94.4 ± 1.2
cg06159394	DMRTA2	0.0004675	89.79 ± 1.23	91.86 ± 1.01	0.607754	91.86 ± 1.01	92.19 ± 0.95
cg18877285	HEPACAM	0.0004692	4.24 ± 0.51	3.41 ± 0.25	0.0424566	3.41 ± 0.25	4 ± 0.64
cg19427188	ACADL	0.0004714	29.42 ± 3.54	32.07 ± 4.19	0.146168	32.07 ± 4.19	30.46 ± 5.73
cg00905858	TRIM26	0.0004732	76.2 ± 1.79	79.88 ± 1.78	0.184125	79.88 ± 1.78	78.34 ± 1.58
cg09936919	Intergenic	0.0004737	94.4 ± 0.73	95.51 ± 0.45	0.131646	95.51 ± 0.45	94.14 ± 1.75
cg11763800	C14orf80	0.0004746	76.29 ± 7.81	85.44 ± 4.95	0.0160734	85.44 ± 4.95	79.12 ± 4.28
cg10106095	PKMYT1;PKMYT1	0.0004755	96.42 ± 0.16	96.82 ± 0.14	0.669137	96.82 ± 0.14	96.77 ± 0.22
cg00927429	FAM189A2	0.000476	4.05 ± 0.43	4.51 ± 0.46	0.300329	4.51 ± 0.46	4.28 ± 0.84
cg02478956	TUBGCP5;TUBGCP5	0.000476	7.89 ± 0.71	7.33 ± 0.77	0.776396	7.33 ± 0.77	7.17 ± 1.46
cg17377054	PCSK1N	0.0004768	6.39 ± 0.6	8.28 ± 1	0.336397	8.28 ± 1	7.61 ± 2.5
cg10209087	DDX60L	0.000479	5.43 ± 0.21	4.52 ± 0.35	0.409193	4.52 ± 0.35	4.78 ± 0.56
cg04663994	CEACAM16	0.00048	45.8 ± 4.37	49.05 ± 4.14	0.188179	49.05 ± 4.14	47.39 ± 2.17
cg09141919	Intergenic	0.000481	4.04 ± 0.43	5.56 ± 0.61	0.0565279	5.56 ± 0.61	6.82 ± 1.3
cg17384417	COL22A1	0.000482	79.34 ± 4.86	77.07 ± 5.39	0.0765266	77.07 ± 5.39	79.4 ± 4.89
cg19307233	C1orf131;GNPAT;GNPAT	0.0004846	4.29 ± 0.77	5.91 ± 0.81	0.0414759	5.91 ± 0.81	4.86 ± 1.19
cg24770019	NCOA7;NCOA7;NCOA7;NCOA7;NCOA7	0.0004849	78.24 ± 1.76	83.44 ± 1.19	0.501179	83.44 ± 1.19	82.37 ± 3.65
cg15266508	COL9A3	0.0004862	7.86 ± 0.28	7.03 ± 0.41	0.0633152	7.03 ± 0.41	8.32 ± 1.83
cg20439295	TTYH1;TTYH1	0.0004865	20.69 ± 1.77	22.45 ± 1.44	0.0498172	22.45 ± 1.44	21.34 ± 1.36
cg12266546	DIS3L;DIS3L	0.0004888	95.42 ± 0.99	96.4 ± 0.71	0.70922	96.4 ± 0.71	95.98 ± 1.44
cg13759594	PDZD7	0.0004961	52.96 ± 1.23	54.61 ± 1.21	0.0485421	54.61 ± 1.21	52.51 ± 1.56
cg14652665	Intergenic	0.0004965	84.78 ± 1.56	82.72 ± 1.89	0.12293	82.72 ± 1.89	85.17 ± 2.28
cg10350073	CCDC93	0.0004968	93.51 ± 0.88	92.06 ± 1.1	0.241959	92.06 ± 1.1	92.96 ± 1.03
cg19336937	FAM107A;FAM107A;FAM107A;FAM107A	0.0004968	66.89 ± 1.71	69.23 ± 1.63	0.378795	69.23 ± 1.63	68.2 ± 1.56
cg10047588	STK11	0.000497	3.75 ± 0.32	3.14 ± 0.23	0.98493	3.14 ± 0.23	3.18 ± 0.6
cg03997626	SIAH3	0.0004973	89.57 ± 1.22	88.06 ± 1.35	0.873382	88.06 ± 1.35	88.2 ± 1.7
cg08671326	C3orf21	0.0004977	88.3 ± 0.58	89.18 ± 0.62	0.355426	89.18 ± 0.62	88.62 ± 1.33
cg21812670	SNORD45C;RABGGTB	0.0005049	35.53 ± 4.05	38.64 ± 4.3	0.704811	38.64 ± 4.3	37.81 ± 2.72
cg11712896	Intergenic	0.0005068	59.28 ± 4.96	51.24 ± 5.34	0.774618	51.24 ± 5.34	50.12 ± 6
cg24870231	Intergenic	0.0005126	93.58 ± 0.93	91.65 ± 1.27	0.743729	91.65 ± 1.27	91.87 ± 0.71
cg24030630	TCIRG1	0.000515	86.84 ± 1.61	89.19 ± 1.43	0.655655	89.19 ± 1.43	88.46 ± 2.08
cg01421405	SNX32;SNX32	0.0005174	5.1 ± 0.71	6.95 ± 0.97	0.10514	6.95 ± 0.97	5.79 ± 0.83
cg13606829	VMA21	0.000518	7.72 ± 3.42	12.65 ± 4.57	0.675663	12.65 ± 4.57	13.62 ± 3.76
cg14137279	Intergenic	0.0005194	4.7 ± 0.65	6.13 ± 0.75	0.0347207	6.13 ± 0.75	4.95 ± 1.01
cg13611094	YIPF2	0.0005202	79 ± 1.93	80.46 ± 1.64	0.0747122	80.46 ± 1.64	81.5 ± 1.97
cg08906298	Intergenic	0.0005227	5.41 ± 0.75	6.62 ± 0.75	0.0089369	6.62 ± 0.75	5.08 ± 1.13
cg12346359	Intergenic	0.0005231	87.38 ± 0.93	90.3 ± 1.29	0.0638388	90.3 ± 1.29	88.63 ± 1.58
cg00414306	HAT1;HAT1	0.000524	3.71 ± 0.47	2.1 ± 0.5	0.000364	2.1 ± 0.5	4.21 ± 0.57
cg15739985	WRB;WRB	0.000527	89.38 ± 1.94	92.94 ± 1.42	0.0237539	92.94 ± 1.42	90.34 ± 1.33
cg06840743	Intergenic	0.000528	35.01 ± 1.07	36.76 ± 0.86	0.0637571	36.76 ± 0.86	35.72 ± 0.82
cg22702328	CA10;CA10;CA10;CA10	0.0005291	5.04 ± 0.89	6.22 ± 1.15	0.224593	6.22 ± 1.15	6.64 ± 0.78
cg15089826	Intergenic	0.000533	92.9 ± 1.47	93.94 ± 1.32	0.216676	93.94 ± 1.32	92.92 ± 0.84
cg12024564	FAM19A2	0.0005332	34.66 ± 1.88	31.56 ± 0.98	0.053843	31.56 ± 0.98	33.59 ± 1.83
cg17305899	GREB1	0.0005336	87.09 ± 0.75	89.75 ± 0.9	0.828763	89.75 ± 0.9	89.86 ± 1.82
cg03606215	GPR125;GPR125	0.000534	5.15 ± 0.37	6.49 ± 0.76	0.0154053	6.49 ± 0.76	5.06 ± 0.75
cg21656685	LPIN2;LOC727896	0.0005348	68.26 ± 3.26	70.35 ± 3.17	0.261776	70.35 ± 3.17	69 ± 1.42
cg07962785	SAMD8;SAMD8	0.0005351	92.89 ± 1.03	94.37 ± 0.49	0.754109	94.37 ± 0.49	94.02 ± 1.4
cg08478195	TPBG;TPBG;TPBG	0.0005395	11.87 ± 2.54	14.22 ± 3.56	0.683043	14.22 ± 3.56	13.73 ± 2.57
cg11333566	HMCN1;MIR548F1	0.0005406	46.44 ± 2.04	49.07 ± 1.88	0.121339	49.07 ± 1.88	47.5 ± 2.49
cg01815778	Intergenic	0.0005407	81.19 ± 1.31	82.44 ± 1.15	0.609385	82.44 ± 1.15	81.7 ± 2.82
cg22963652	Intergenic	0.0005412	53.82 ± 1.94	57.07 ± 1.69	0.00589	57.07 ± 1.69	54.45 ± 1.48
cg26500143	DHX37	0.0005414	88.26 ± 0.85	85.61 ± 0.97	0.261357	85.61 ± 0.97	86.82 ± 2.24
cg12057517	WAC;WAC;WAC	0.0005423	69.62 ± 1.85	72.43 ± 1.42	0.0359387	72.43 ± 1.42	69.28 ± 1.88
cg06836633	MSI1;MSI1	0.0005427	87.97 ± 1.31	89.59 ± 0.94	0.303902	89.59 ± 0.94	88.97 ± 1.44
cg08872246	Intergenic	0.0005438	67.89 ± 2.88	72.96 ± 2.46	0.0526879	72.96 ± 2.46	69.76 ± 4.19
cg20803931	VPS13D;VPS13D	0.0005473	94.81 ± 1.37	93.38 ± 1.29	0.712752	93.38 ± 1.29	93.75 ± 1.14
cg11216272	SYTL4;SYTL4;SYTL4	0.0005517	22.11 ± 4.65	16.94 ± 4.46	0.617981	16.94 ± 4.46	16.48 ± 4.31
cg19685881	SLCO3A1;SLCO3A1	0.000556	87.53 ± 2.2	89.23 ± 2.15	0.0994808	89.23 ± 2.15	87.41 ± 2.82
cg00215019	C10orf72;C10orf72	0.0005564	5.37 ± 0.89	7.19 ± 0.92	0.121713	7.19 ± 0.92	6.15 ± 1.17
cg03978648	Intergenic	0.0005581	91.98 ± 0.66	93.05 ± 0.67	0.997929	93.05 ± 0.67	93 ± 1.21
cg13723217	Intergenic	0.0005598	5.16 ± 0.49	7.17 ± 1.13	0.25467	7.17 ± 1.13	6.2 ± 1.05
cg06525438	Intergenic	0.0005609	94.78 ± 0.62	96.47 ± 0.55	0.0581309	96.47 ± 0.55	95.12 ± 1.08
cg17218510	HEPACAM2;HEPACAM2	0.0005616	23.79 ± 3.39	30.72 ± 2.8	0.392234	30.72 ± 2.8	28.62 ± 3.96
cg26965604	APAF1;APAF1;APAF1;APAF1;APAF1	0.0005635	92.83 ± 1.3	90.61 ± 0.97	0.133805	90.61 ± 0.97	91.36 ± 0.87
cg09423273	LINC00489	0.0005666	91.85 ± 1.12	93.57 ± 1	0.0840854	93.57 ± 1	92.12 ± 1.49
cg12069185	Intergenic	0.0005684	82.69 ± 0.79	85.3 ± 0.46	0.481447	85.3 ± 0.46	84.99 ± 1.28
cg10775278	SIAH3	0.0005756	7.97 ± 1.19	9.83 ± 1.14	0.0729325	9.83 ± 1.14	8.04 ± 1
cg03712816	SALL3	0.0005788	6.85 ± 1	5.56 ± 1.06	0.174097	5.56 ± 1.06	6.4 ± 1.65
cg13236409	Intergenic	0.0005796	81.58 ± 1.18	84.59 ± 1.18	0.0840612	84.59 ± 1.18	83 ± 2.37
cg09871247	Intergenic	0.0005801	5.07 ± 0.4	4.31 ± 0.28	0.969065	4.31 ± 0.28	4.33 ± 0.38
cg26277556	Intergenic	0.0005816	31.53 ± 2.01	33.96 ± 1.74	0.951366	33.96 ± 1.74	34.04 ± 3.11
cg10280383	SPTBN2	0.0005859	95.27 ± 0.6	96.73 ± 0.61	0.170813	96.73 ± 0.61	96.17 ± 0.65
cg07696673	CADPS2;CADPS2;CADPS2	0.000586	70.05 ± 2.37	73.13 ± 2.02	0.0938704	73.13 ± 2.02	70.43 ± 2.02
cg15825670	LINC00276	0.0005892	82.29 ± 1.83	78.56 ± 2.9	0.477557	78.56 ± 2.9	79.45 ± 3.02
cg21715802	Intergenic	0.0005898	85.68 ± 1.24	84.19 ± 1.16	0.0942534	84.19 ± 1.16	85.56 ± 1.37
cg27119815	SH3RF3	0.00059	77.64 ± 2.66	75.49 ± 2.21	0.0188662	75.49 ± 2.21	77.34 ± 1.34
cg10785517	Intergenic	0.0005903	94.56 ± 0.43	94.94 ± 0.44	0.382812	94.94 ± 0.44	95.44 ± 1.34
cg08189464	Intergenic	0.0005927	43.9 ± 1.34	46.25 ± 1.2	0.0241538	46.25 ± 1.2	44.91 ± 1.42
cg00742025	LOC101927630	0.0005931	87.49 ± 2.69	91.32 ± 1.72	0.329225	91.32 ± 1.72	89.75 ± 2.25
cg04580872	HSF4;HSF4	0.000596	27 ± 0.6	28.11 ± 0.83	0.164064	28.11 ± 0.83	26.9 ± 1.56
cg01043759	CALD1;CALD1;CALD1	0.0005973	28.32 ± 5.19	31.85 ± 5.19	0.982475	31.85 ± 5.19	31.78 ± 4.96
cg25085038	PANK2;MIR103-2;PANK2;PANK2	0.0005975	92.63 ± 1.26	93.98 ± 1.19	0.671267	93.98 ± 1.19	93.35 ± 1.97
cg03424478	ASAP2;ASAP2	0.0005985	6.06 ± 0.5	5.24 ± 0.48	0.0590549	5.24 ± 0.48	5.74 ± 0.64
cg14844886	Intergenic	0.0005989	95.72 ± 0.51	94.8 ± 0.55	0.0168078	94.8 ± 0.55	96.11 ± 0.71
cg07795614	Intergenic	0.0005998	85.98 ± 1.88	88.88 ± 1.13	0.336455	88.88 ± 1.13	88.06 ± 1.16
cg15326304	HSD17B2	0.0006018	83.9 ± 1.82	86.71 ± 1.49	0.147102	86.71 ± 1.49	84.05 ± 3.5
cg14439102	GNAQ	0.0006062	88.21 ± 2.26	91.27 ± 1.91	0.594313	91.27 ± 1.91	89.89 ± 3.55
cg24997028	Intergenic	0.0006066	25.98 ± 2.72	30.07 ± 3.57	0.563185	30.07 ± 3.57	29.24 ± 3.98
cg13916261	FNBP1	0.0006103	92.12 ± 4.93	88.73 ± 5.73	0.754475	88.73 ± 5.73	89.81 ± 3.19
cg08287903	UGT8	0.0006132	5.13 ± 0.45	5.92 ± 0.5	0.136312	5.92 ± 0.5	5.43 ± 0.65
cg05867533	Intergenic	0.0006133	12.84 ± 2.12	14.83 ± 2.87	0.215286	14.83 ± 2.87	12.32 ± 2.67
cg26113576	NREP;NREP;NREP;NREP;NREP;NREP;NREP;NREP;NREP;STARD4-AS1;NREP;NREP	0.0006135	5.34 ± 0.49	4.79 ± 0.37	0.107048	4.79 ± 0.37	5.25 ± 0.49
cg14609733	ANKRD55	0.0006145	12.47 ± 1.33	14.5 ± 1.31	0.210556	14.5 ± 1.31	13.22 ± 2.33
cg18914852	Intergenic	0.0006171	44.02 ± 2.51	46.3 ± 2.26	0.0010903	46.3 ± 2.26	43.25 ± 1.77
cg07051905	FOXA3	0.0006174	66.85 ± 2.25	69.63 ± 2.02	0.860469	69.63 ± 2.02	69.49 ± 1.48
cg06615999	ACSF3;ACSF3;ACSF3	0.0006191	91.54 ± 0.71	90.57 ± 0.8	0.428898	90.57 ± 0.8	91.1 ± 0.95
cg02545556	FAM38A	0.0006205	89.17 ± 1.05	91.05 ± 0.9	0.456535	91.05 ± 0.9	90.57 ± 1.07
cg00369899	SNX31;SNX31	0.000623	90.32 ± 1.24	87.54 ± 1.57	0.190439	87.54 ± 1.57	88.98 ± 2.34
cg14404992	EMP2	0.0006239	46.25 ± 3.06	47.6 ± 3.29	0.0943569	47.6 ± 3.29	46.17 ± 4.23
cg24890446	NAP1L4	0.0006239	5.62 ± 0.37	4.71 ± 0.43	0.494146	4.71 ± 0.43	5.04 ± 0.85
cg09439920	TBC1D23	0.0006248	4.05 ± 0.38	5.04 ± 0.72	0.346208	5.04 ± 0.72	4.27 ± 1.63
cg19156483	FIGN	0.0006299	5.47 ± 0.26	6.57 ± 0.46	0.57218	6.57 ± 0.46	7.05 ± 1.68
cg27333720	Intergenic	0.0006306	49.53 ± 2.92	54.75 ± 2.39	0.196702	54.75 ± 2.39	52.62 ± 3.89
cg01694698	HELLS;HELLS;HELLS;HELLS;HELLS;HELLS;HELLS;HELLS;HELLS;HELLS	0.0006329	81.86 ± 1.8	85.03 ± 1.84	0.868932	85.03 ± 1.84	85.23 ± 1.1
cg26275419	Intergenic	0.0006342	79.08 ± 4.86	85.08 ± 4.58	0.849737	85.08 ± 4.58	84.29 ± 5.5
cg01524723	Intergenic	0.0006346	90.01 ± 4.79	85.97 ± 6.37	0.14838	85.97 ± 6.37	90.45 ± 2.83
cg02273875	ST6GALNAC4;ST6GALNAC4	0.0006355	7.02 ± 1.06	5.59 ± 0.92	0.691383	5.59 ± 0.92	5.76 ± 0.71
cg02966874	TBC1D22A;TBC1D22A;TBC1D22A;TBC1D22A;TBC1D22A	0.0006365	63.69 ± 4.88	69.02 ± 3.65	0.0319172	69.02 ± 3.65	66.56 ± 2.32
cg20216802	MME;MME;MME;MME;MME	0.0006368	5.8 ± 1.07	7.42 ± 1.23	0.31292	7.42 ± 1.23	6.51 ± 1.24
cg11333459	PAX6	0.0006371	8.69 ± 1.75	13.79 ± 3.03	0.392449	13.79 ± 3.03	12.08 ± 2.64
cg27495636	POU5F1B	0.00064	10.85 ± 1.42	14.16 ± 2.16	0.35316	14.16 ± 2.16	12.37 ± 5.86
cg26754170	Intergenic	0.0006427	10.39 ± 2.02	13.45 ± 2.33	0.430368	13.45 ± 2.33	12.52 ± 2.71
cg25587181	Intergenic	0.0006432	5.98 ± 0.42	4.9 ± 0.25	0.229052	4.9 ± 0.25	5.47 ± 0.87
cg00795412	Intergenic	0.0006433	8.07 ± 0.98	10.89 ± 1.46	0.0113759	10.89 ± 1.46	8.03 ± 1.15
cg21619224	EZR;EZR	0.0006433	95.54 ± 0.68	92.99 ± 1.18	0.518339	92.99 ± 1.18	93.54 ± 1.23
cg13795579	ARPP21;ARPP21;ARPP21	0.0006444	48.54 ± 2.75	52.31 ± 2.27	0.841999	52.31 ± 2.27	52.02 ± 1.64
cg01267076	Intergenic	0.0006463	9.59 ± 0.84	11.14 ± 0.69	0.0115933	11.14 ± 0.69	9.6 ± 0.86
cg24198165	DHX36;DHX36	0.0006464	91.02 ± 2.4	93.13 ± 1.96	0.0217889	93.13 ± 1.96	90.32 ± 1.17
cg17036562	TPH2	0.0006487	94.46 ± 0.58	95.96 ± 0.37	0.149011	95.96 ± 0.37	94.8 ± 1.31
cg18338194	P2RY14;MED12L	0.0006492	83.62 ± 2.36	86.26 ± 1.37	0.723997	86.26 ± 1.37	86.56 ± 2.3
cg04219144	LRRC40	0.0006507	90.59 ± 0.74	92.72 ± 0.42	0.219603	92.72 ± 0.42	91.06 ± 2.48
cg11518244	ADO;ADO	0.0006523	68.63 ± 1.31	71.5 ± 1.86	0.0095415	71.5 ± 1.86	67.32 ± 2.18
cg10158711	PDIA4	0.0006532	3.7 ± 0.25	5.18 ± 0.35	0.0228298	5.18 ± 0.35	4.25 ± 0.75
cg15524173	PLD3;PLD3;C19orf47	0.0006535	5.63 ± 0.94	6.48 ± 0.97	0.0340184	6.48 ± 0.97	5.16 ± 0.87
cg00326183	AGXT;AGXT	0.0006536	40.98 ± 2.07	42.95 ± 2.07	0.378835	42.95 ± 2.07	42.25 ± 2.17
cg09807643	Intergenic	0.0006579	28.23 ± 2.16	30.88 ± 2.1	0.0253233	30.88 ± 2.1	28.57 ± 2.46
cg26223654	MAST1;MAST1	0.000658	29.97 ± 1.75	28.21 ± 1.69	0.170053	28.21 ± 1.69	28.86 ± 1.16
cg20556598	RS1	0.000659	88.88 ± 3.49	92.72 ± 2.11	0.99545	92.72 ± 2.11	92.76 ± 1.89
cg23425081	FAM96B;FAM96B;FAM96B;CES2;CES2;CES2;CES2;CES2	0.0006595	3.39 ± 0.47	2.88 ± 0.35	0.122299	2.88 ± 0.35	2.6 ± 0.38
cg18701660	PEPD;PEPD;PEPD	0.0006597	19 ± 3.44	22.39 ± 3.86	0.032467	22.39 ± 3.86	18.82 ± 3.23
cg00291136	INAFM1;INAFM1	0.0006599	7.52 ± 1.69	4.96 ± 1.44	0.0092325	4.96 ± 1.44	6.46 ± 1.38
cg20345275	TMEM154	0.0006605	74.24 ± 1.66	75.87 ± 1.5	0.699225	75.87 ± 1.5	75.4 ± 2.52
cg23535784	Intergenic	0.0006608	7.5 ± 0.68	9.16 ± 1.08	0.19604	9.16 ± 1.08	8.32 ± 1.36
cg04124830	ZNF678;ZNF678;ZNF678	0.0006621	91.39 ± 2.02	93.34 ± 1.92	0.952014	93.34 ± 1.92	93.35 ± 1.52
cg01133620	DOK4	0.0006627	89.06 ± 1.43	92.54 ± 0.59	0.005791	92.54 ± 0.59	90.45 ± 1.09
cg14857493	Intergenic	0.0006637	78.3 ± 1.57	80.63 ± 1.68	0.739896	80.63 ± 1.68	80.04 ± 2.66
cg04104119	LNPEP;LNPEP	0.0006654	92.17 ± 2.22	88.91 ± 2.95	0.718591	88.91 ± 2.95	89.39 ± 3.02
cg15337897	FGF3	0.0006682	3.33 ± 0.29	3.72 ± 0.25	0.812208	3.72 ± 0.25	3.73 ± 1.1
cg01218148	ENHO	0.0006686	52.99 ± 2.51	55.94 ± 2.11	0.515513	55.94 ± 2.11	55.27 ± 2.32
cg01203812	PRDM16;PRDM16	0.0006693	86.12 ± 0.62	87.26 ± 0.57	0.447149	87.26 ± 0.57	86.72 ± 1.6
cg18177955	GGA3;GGA3;GGA3;GGA3;MRPS7;GGA3;GGA3	0.0006697	6.49 ± 0.66	7.8 ± 0.95	0.23769	7.8 ± 0.95	7 ± 1.31
cg17280459	Intergenic	0.0006702	3.98 ± 0.4	3.45 ± 0.28	0.099671	3.45 ± 0.28	4.11 ± 0.94
cg25874170	Intergenic	0.0006735	79.77 ± 2.29	82.05 ± 1.97	0.93487	82.05 ± 1.97	81.92 ± 2.35
cg05359649	Intergenic	0.0006753	8.66 ± 1.81	11.73 ± 2.51	0.0607814	11.73 ± 2.51	9.15 ± 1.44
cg21180793	RAB3C	0.0006757	91.14 ± 2.09	93.74 ± 1.28	0.556752	93.74 ± 1.28	93.1 ± 1.59
cg05705366	SNX18;SNX18;SNX18	0.0006766	6.9 ± 0.6	8.06 ± 0.8	0.0461132	8.06 ± 0.8	6.59 ± 1.39
cg07353275	CTIF;CTIF	0.0006781	94.18 ± 0.81	91.18 ± 1.18	0.441796	91.18 ± 1.18	91.67 ± 2.52
cg16071328	Intergenic	0.0006797	84.59 ± 2.27	86.91 ± 1.59	0.977194	86.91 ± 1.59	86.84 ± 1.99
cg00571641	Intergenic	0.0006806	87.65 ± 0.91	85.64 ± 0.81	0.841962	85.64 ± 0.81	85.74 ± 1.74
cg13439315	SORCS2	0.0006876	30.82 ± 1.36	33.53 ± 1.57	0.0659597	33.53 ± 1.57	31.33 ± 2.88
cg00022826	LOC101927179;LOC101927179;CORIN;CORIN;CORIN	0.0006889	86.97 ± 2.18	90.42 ± 1.56	0.47916	90.42 ± 1.56	89.52 ± 1.47
cg17711402	Intergenic	0.0006933	45.73 ± 1.87	49.14 ± 1.56	0.0408064	49.14 ± 1.56	47.29 ± 1.79
cg01364613	KLF12	0.0006951	5.99 ± 0.74	4.81 ± 0.5	0.0071872	4.81 ± 0.5	6.2 ± 0.94
cg08255683	LOC101060498;LOC101060498	0.0006987	83.63 ± 2.83	90.77 ± 2.48	0.181346	90.77 ± 2.48	86.98 ± 5.31
cg26790036	ARG2	0.0007003	5.8 ± 0.69	6.45 ± 0.84	0.477212	6.45 ± 0.84	6.14 ± 0.75
cg10103955	PRKAR1B;PRKAR1B;PRKAR1B;PRKAR1B;PRKAR1B;PRKAR1B	0.0007007	75.12 ± 3	79.37 ± 2.71	0.866244	79.37 ± 2.71	79.22 ± 1.65
cg00182405	LOC101928847;NCAM1;NCAM1;NCAM1;NCAM1;NCAM1	0.0007014	50.08 ± 4.61	46.55 ± 5.29	0.0703302	46.55 ± 5.29	49.57 ± 3.56
cg07452843	MYO7A;MYO7A;MYO7A	0.000702	80.51 ± 1.37	83.13 ± 1.43	0.0094329	83.13 ± 1.43	80.31 ± 0.87
cg08932380	FER1L6	0.0007032	46.93 ± 3.14	50.86 ± 2.53	0.149358	50.86 ± 2.53	47.52 ± 3.3
cg01266680	PTCSC3	0.000704	18.85 ± 1.78	20.96 ± 1.74	0.0158934	20.96 ± 1.74	18.14 ± 1.69
cg24734473	Intergenic	0.0007046	93.78 ± 0.69	94.85 ± 0.63	0.657187	94.85 ± 0.63	95.03 ± 0.88
cg16389578	NLRP3;NLRP3;NLRP3;NLRP3;NLRP3;NLRP3	0.0007054	3.38 ± 0.43	4.63 ± 0.67	0.164062	4.63 ± 0.67	3.84 ± 1.24
cg00944808	EHD4;EHD4	0.0007059	3.62 ± 0.52	2.99 ± 0.4	0.908089	2.99 ± 0.4	3.14 ± 0.93
cg13031395	Intergenic	0.0007059	55.8 ± 1.77	57.87 ± 1.6	0.0101213	57.87 ± 1.6	55.73 ± 1.94
cg13066461	MRGPRX2	0.0007069	55.62 ± 7.51	53.02 ± 8.2	0.543342	53.02 ± 8.2	54.67 ± 7.05
cg00259966	TRIM47	0.0007091	6.49 ± 1.45	7.56 ± 1.93	0.0135355	7.56 ± 1.93	6.2 ± 1.35
cg02120712	Intergenic	0.0007121	4.88 ± 0.57	3.92 ± 0.57	0.974353	3.92 ± 0.57	3.97 ± 0.91
cg27348420	C6orf208	0.0007147	5.87 ± 0.43	5.16 ± 0.23	0.499839	5.16 ± 0.23	5.34 ± 0.5
cg15091337	POLE4	0.0007169	5.03 ± 0.37	4.06 ± 0.29	0.112655	4.06 ± 0.29	4.52 ± 0.66
cg09451413	LCP2;LCP2	0.0007177	55.9 ± 3.07	58.79 ± 2.59	0.677314	58.79 ± 2.59	58.49 ± 2.15
cg12214255	LYPLA2;LYPLA2	0.0007177	54.63 ± 1.78	56.01 ± 1.49	0.412444	56.01 ± 1.49	55.35 ± 1.21
cg23829948	Intergenic	0.0007184	36.65 ± 1.39	37.83 ± 1.24	0.269149	37.83 ± 1.24	38.64 ± 2.19
cg11888572	PARP11	0.0007189	5.51 ± 1.08	3.91 ± 0.66	0.0323803	3.91 ± 0.66	4.69 ± 0.87
cg02149658	CARD14	0.0007192	86.73 ± 1.68	90.13 ± 1.07	0.153516	90.13 ± 1.07	88.79 ± 1.36
cg24692861	C3orf33	0.0007211	4.36 ± 0.76	6.47 ± 1.04	0.1735	6.47 ± 1.04	5.53 ± 1.27
cg20750598	ABCA3	0.0007246	91.14 ± 0.88	92.22 ± 0.91	0.129694	92.22 ± 0.91	91.6 ± 0.86
cg07056242	SLC6A6;SLC6A6	0.0007258	94.47 ± 0.56	95.61 ± 0.71	0.128247	95.61 ± 0.71	94.59 ± 0.87
cg00145284	Intergenic	0.0007274	72.83 ± 1.81	74.74 ± 1.81	0.0657198	74.74 ± 1.81	75.39 ± 2.48
cg26181372	ALDOB	0.0007307	89.41 ± 1.76	92.16 ± 1.67	0.757787	92.16 ± 1.67	92.02 ± 1.47
cg02367708	CXCR4;CXCR4;CXCR4	0.0007334	85.49 ± 1.69	82.46 ± 2.68	0.199562	82.46 ± 2.68	85.15 ± 3.2
cg03147185	NCAPH	0.0007345	9.74 ± 1.02	8.9 ± 0.93	0.145042	8.9 ± 0.93	9.73 ± 1.49
cg08132573	Intergenic	0.0007354	89.78 ± 1.34	92.23 ± 1.02	0.349257	92.23 ± 1.02	91.42 ± 2.49
cg25293896	EXOC3L2	0.0007354	10.99 ± 0.85	9.16 ± 0.8	0.0932718	9.16 ± 0.8	10.46 ± 1.04
cg02886023	IHH	0.0007365	4.3 ± 0.36	3.46 ± 0.5	0.0311602	3.46 ± 0.5	4.36 ± 0.97
cg26896991	DNM1;DNM1;DNM1;DNM1;DNM1	0.0007381	95.25 ± 0.23	94.45 ± 0.4	0.673861	94.45 ± 0.4	94.56 ± 0.47
cg03233151	GBA2	0.0007382	72.95 ± 4.73	76.12 ± 4.17	0.21629	76.12 ± 4.17	75.16 ± 3.63
cg22868111	Intergenic	0.0007385	9.85 ± 1.92	12.59 ± 2.67	0.0410208	12.59 ± 2.67	8.39 ± 1.7
cg19470459	DPP6;DPP6;DPP6	0.0007386	82.48 ± 2.32	84.45 ± 2.53	0.774487	84.45 ± 2.53	84.04 ± 2.13
cg09475932	FBXO7;FBXO7	0.0007406	5.85 ± 0.81	8.28 ± 0.85	0.118683	8.28 ± 0.85	6.96 ± 1.55
cg10983873	LINC01135;LINC01135;LINC01135	0.0007429	89.75 ± 1.5	93.06 ± 0.94	0.13963	93.06 ± 0.94	91.47 ± 2.02
cg23935261	UCK2	0.0007439	91.75 ± 0.75	93.94 ± 0.5	0.0421057	93.94 ± 0.5	93.34 ± 0.58
cg05967123	PRCC;PRCC	0.0007441	4.43 ± 0.41	3.54 ± 0.3	0.0297867	3.54 ± 0.3	4.27 ± 0.57
cg20613259	NT5C2;NT5C2	0.0007446	88.09 ± 2.07	92.01 ± 1.76	0.142573	92.01 ± 1.76	89.89 ± 2.23
cg02653150	ACACB	0.0007481	90.29 ± 1.14	91.78 ± 1.2	0.500356	91.78 ± 1.2	91.09 ± 1.4
cg02418475	TMEM44;TMEM44;TMEM44;TMEM44	0.0007506	90.68 ± 1.09	92.45 ± 0.46	0.197162	92.45 ± 0.46	91.67 ± 1.24
cg04777091	JAKMIP1	0.0007521	91.71 ± 1.17	87.92 ± 1.49	0.167632	87.92 ± 1.49	89.48 ± 1.54
cg26254553	UVRAG	0.0007524	54.62 ± 2.02	56.62 ± 2	0.996834	56.62 ± 2	56.61 ± 2.45
cg13506019	PRIM2	0.0007532	67.43 ± 4.37	72.78 ± 3.34	0.0794738	72.78 ± 3.34	70.08 ± 3.82
cg17045609	STK38;STK38	0.0007548	7.42 ± 1.31	11.1 ± 1.72	0.0053292	11.1 ± 1.72	8.06 ± 1.31
cg27424370	Intergenic	0.0007574	7.66 ± 0.93	9.47 ± 1.29	0.0768244	9.47 ± 1.29	8.65 ± 1.05
cg04423314	TFR2	0.0007578	51.07 ± 1.12	52.03 ± 1.24	0.181553	52.03 ± 1.24	52.78 ± 1.98
cg00354884	ABR;ABR	0.0007584	5.17 ± 0.77	4.52 ± 0.57	0.80317	4.52 ± 0.57	4.57 ± 0.33
cg00238131	CITED1;CITED1	0.0007598	6.25 ± 0.94	7.73 ± 1.22	0.121006	7.73 ± 1.22	5.75 ± 1.43
cg24601967	ACOT7;ACOT7;ACOT7;ACOT7	0.0007607	74.94 ± 1.98	72.92 ± 1.7	0.236649	72.92 ± 1.7	74.21 ± 1.2
cg02956019	PCSK6;PCSK6;PCSK6;PCSK6;PCSK6;PCSK6;PCSK6	0.000761	19.73 ± 1.5	22.9 ± 1.92	0.0944984	22.9 ± 1.92	21.59 ± 0.82
cg00712984	RERG;RERG	0.0007648	54.39 ± 2.73	56.71 ± 2.44	0.296632	56.71 ± 2.44	55.37 ± 1.11
cg16791787	Intergenic	0.0007654	92.39 ± 1.35	90.08 ± 1.86	0.657876	90.08 ± 1.86	90.68 ± 0.9
cg02589459	ATP6V0E1	0.0007657	6.31 ± 0.72	4.82 ± 0.77	0.0670404	4.82 ± 0.77	5.41 ± 0.82
cg20567227	ATP8A1;ATP8A1	0.0007798	92.39 ± 0.81	94.25 ± 0.57	0.0303542	94.25 ± 0.57	92.82 ± 1.29
cg00292073	Intergenic	0.0007821	91.71 ± 1.49	93.32 ± 1.31	0.292233	93.32 ± 1.31	92.51 ± 1.01
cg25650956	MYH1	0.0007834	6.04 ± 0.89	7.86 ± 1.07	0.360794	7.86 ± 1.07	6.98 ± 1.42
cg02159174	CACNB2;CACNB2;CACNB2;CACNB2;CACNB2;CACNB2	0.0007874	76.09 ± 2.21	78.59 ± 2.08	0.0051325	78.59 ± 2.08	76.02 ± 2.16
cg21019638	Intergenic	0.0007889	77.51 ± 1.48	81.27 ± 1.38	0.0412411	81.27 ± 1.38	79.18 ± 1.87
cg13351161	SCARA3;SCARA3	0.0007894	92.2 ± 1.59	89.35 ± 2.5	0.0625136	89.35 ± 2.5	92.13 ± 1.54
cg15253664	RASAL1;RASAL1;RASAL1;RASAL1	0.0007894	69.55 ± 2.77	70.7 ± 2.73	0.997885	70.7 ± 2.73	70.59 ± 4.37
cg24926361	GSC2	0.0007938	14 ± 2.47	15.4 ± 2.56	0.354363	15.4 ± 2.56	14.63 ± 2.21
cg06517189	ACTL8	0.0007947	89.82 ± 1.84	86.82 ± 1.82	0.038744	86.82 ± 1.82	88.29 ± 1.76
cg10353985	NSMCE1	0.0007951	58.74 ± 2.06	61.23 ± 1.79	0.0419881	61.23 ± 1.79	59.98 ± 2.66
cg22215520	PAIP1;PAIP1;PAIP1	0.0007969	2.89 ± 0.36	3.25 ± 0.38	0.226306	3.25 ± 0.38	2.84 ± 0.45
cg24527414	IMMP1L;IMMP1L	0.0007986	90.76 ± 2.04	93.36 ± 1.69	0.209215	93.36 ± 1.69	91.89 ± 1.32
cg24100168	TRIM78P	0.0007987	37.16 ± 1.2	39.02 ± 1.16	0.0227372	39.02 ± 1.16	37.18 ± 1.75
cg26384229	ALG10B	0.000801	4.92 ± 0.54	3.94 ± 0.62	0.0762536	3.94 ± 0.62	4.75 ± 0.68
cg22730994	CKLF;CKLF;CKLF;CKLF;CKLF;CKLF-CMTM1;CKLF-CMTM1;CKLF-CMTM1	0.0008019	89.96 ± 0.89	91.93 ± 0.6	0.515916	91.93 ± 0.6	92.33 ± 1.1
cg14229688	KIAA1737	0.0008037	4.89 ± 1.56	6.59 ± 1.63	0.762226	6.59 ± 1.63	6.88 ± 1.59
cg13072098	ROR1;ROR1	0.0008048	76.98 ± 2.2	79.64 ± 1.27	0.269459	79.64 ± 1.27	78.25 ± 1.78
cg12302039	RAB11FIP2	0.0008084	81.86 ± 3.41	87.61 ± 1.89	0.675047	87.61 ± 1.89	86.59 ± 4.27
cg02200377	RAI14;RAI14;RAI14	0.0008101	3.05 ± 0.41	2.67 ± 0.33	0.12558	2.67 ± 0.33	3.55 ± 0.8
cg10765387	COBL	0.0008107	22.98 ± 1.42	26.75 ± 1.05	0.0640844	26.75 ± 1.05	24.35 ± 2.66
cg25044874	Intergenic	0.0008147	85.85 ± 2.08	87.74 ± 1.93	0.639861	87.74 ± 1.93	87.41 ± 1.13
cg04637838	Intergenic	0.0008167	42.02 ± 1.75	45.08 ± 2.32	0.398863	45.08 ± 2.32	43.72 ± 2.94
cg24534173	SPATA22;SPATA22;SPATA22;SPATA22;SPATA22;SPATA22;SPATA22;SPATA22;SPATA22;SPATA22;SPATA22	0.0008171	95.67 ± 0.37	96.75 ± 0.35	0.847335	96.75 ± 0.35	96.52 ± 1.03
cg03109908	CNOT4;CNOT4;CNOT4;CNOT4;CNOT4;CNOT4	0.0008178	3.2 ± 0.29	3.69 ± 0.33	0.7883	3.69 ± 0.33	3.63 ± 0.46
cg06422947	VAT1	0.0008181	88.7 ± 1.27	90.61 ± 0.98	0.243167	90.61 ± 0.98	89.71 ± 1.27
cg11308136	ALMS1	0.0008182	86.22 ± 1.15	84.82 ± 1.48	0.361259	84.82 ± 1.48	85.76 ± 2.19
cg19468576	GSTA4	0.0008223	89.5 ± 2.03	94.5 ± 1.12	0.0309063	94.5 ± 1.12	92.75 ± 1.28
cg20691608	RASA3	0.0008243	13.43 ± 1.07	11.96 ± 1.3	0.310474	11.96 ± 1.3	13 ± 1.98
cg21881859	C17orf85;C17orf85	0.0008243	17.7 ± 1.86	16.23 ± 1.8	0.242536	16.23 ± 1.8	17.71 ± 1.79
cg13683282	ZMPSTE24	0.0008264	3.54 ± 0.28	3.15 ± 0.25	0.654862	3.15 ± 0.25	3.4 ± 0.78
cg06703482	GALNT10	0.0008289	94.38 ± 0.99	95.88 ± 0.93	0.185789	95.88 ± 0.93	95.46 ± 0.58
cg22979433	RNU5E;RNU5D;CKMT2;CKMT2;CKMT2	0.0008302	94.48 ± 0.63	92.85 ± 1.15	0.259466	92.85 ± 1.15	93.5 ± 0.65
cg10583499	ASAH1;ASAH1;ASAH1	0.0008325	3.32 ± 0.49	4.18 ± 0.58	0.038792	4.18 ± 0.58	3.52 ± 0.52
cg04196561	Intergenic	0.0008333	92.31 ± 1.07	90.83 ± 1.31	0.876716	90.83 ± 1.31	90.99 ± 0.9
cg11195038	Intergenic	0.0008335	19.93 ± 1.85	21.42 ± 1.58	0.586413	21.42 ± 1.58	21.84 ± 1.34
cg05072179	GPBP1L1	0.0008336	92.65 ± 0.8	90.79 ± 0.97	0.448132	90.79 ± 0.97	91.22 ± 1.06
cg03767300	Intergenic	0.0008347	81.42 ± 3.5	88.66 ± 2.73	0.389777	88.66 ± 2.73	87 ± 3.99
cg12022630	Intergenic	0.0008348	32.26 ± 1.24	33.41 ± 0.96	0.221762	33.41 ± 0.96	32.76 ± 1.28
cg26310823	NGLY1;NGLY1;NGLY1;NGLY1	0.0008364	5.58 ± 0.7	4.45 ± 0.71	0.0477856	4.45 ± 0.71	6.1 ± 0.87
cg11117703	Intergenic	0.0008377	93.43 ± 2	95.02 ± 1.38	0.924748	95.02 ± 1.38	95.21 ± 0.78
cg01439488	ANKRD5;ANKRD5;ANKRD5;ANKRD5	0.0008385	5.1 ± 0.4	4.43 ± 0.49	0.214323	4.43 ± 0.49	4.84 ± 0.51
cg24122676	CLMN	0.0008416	91.72 ± 0.61	92.84 ± 0.58	0.128354	92.84 ± 0.58	92.01 ± 0.94
cg09363424	SNORA27;SNORD102;RPL21P28;RPL21	0.0008436	86.05 ± 4.07	92.15 ± 2.54	0.699551	92.15 ± 2.54	91.38 ± 2.84
cg27120683	HIST1H4A;HIST1H4A	0.0008437	4.4 ± 0.5	5.36 ± 0.72	0.267622	5.36 ± 0.72	4.88 ± 0.99
cg10168850	ZNF622	0.0008449	4.33 ± 0.59	3.31 ± 0.5	0.204318	3.31 ± 0.5	3.95 ± 0.81
cg09423661	Intergenic	0.0008453	91.68 ± 0.73	89.19 ± 1.63	0.181238	89.19 ± 1.63	90.03 ± 1.47
cg10199770	Intergenic	0.0008454	94.79 ± 0.66	95.67 ± 0.55	0.598083	95.67 ± 0.55	95.94 ± 1.2
cg08313491	RPL13AP3	0.0008465	81.88 ± 0.44	83.88 ± 0.64	0.124719	83.88 ± 0.64	82.73 ± 1.38
cg18239246	Intergenic	0.0008489	7.71 ± 0.73	6.34 ± 0.44	0.805858	6.34 ± 0.44	6.46 ± 0.72
cg14084144	TIGD1;TIGD1;EIF4E2;EIF4E2;EIF4E2;EIF4E2;MIR5001	0.0008502	5.78 ± 0.45	4.88 ± 0.57	0.0002722	4.88 ± 0.57	5.73 ± 0.54
cg18045859	CLDN3;CLDN3	0.000853	3.82 ± 0.35	3.19 ± 0.36	0.128555	3.19 ± 0.36	3.64 ± 0.51
cg05480055	SLC2A13	0.0008532	4.51 ± 0.33	3.78 ± 0.11	0.76014	3.78 ± 0.11	3.86 ± 0.38
cg25722212	Intergenic	0.0008535	5.86 ± 0.66	4.95 ± 0.52	0.0796197	4.95 ± 0.52	5.67 ± 0.86
cg04392715	Intergenic	0.0008598	53.62 ± 1.6	55.16 ± 1.42	0.207608	55.16 ± 1.42	54.01 ± 1.14
cg01183510	IRAK3;IRAK3	0.0008628	84.88 ± 2.82	88.71 ± 1.21	0.124737	88.71 ± 1.21	87.76 ± 0.89
cg13703698	Intergenic	0.0008639	81.37 ± 2.34	84.81 ± 1.63	0.996201	84.81 ± 1.63	84.5 ± 3.65
cg06843218	Intergenic	0.0008649	84.5 ± 0.96	85.54 ± 0.8	0.30529	85.54 ± 0.8	86.09 ± 0.93
cg06670639	ATHL1	0.0008658	79.2 ± 1.74	81.59 ± 0.96	0.914937	81.59 ± 0.96	81.42 ± 2.09
cg18050233	CCDC152;SEPP1;SEPP1;SEPP1	0.0008662	87.1 ± 2.3	84.71 ± 2.21	0.199811	84.71 ± 2.21	86.58 ± 2.79
cg02288296	SNX8;SNX8	0.0008714	7.1 ± 0.83	5.6 ± 0.84	0.686671	5.6 ± 0.84	6.16 ± 2.11
cg04331368	LPHN3	0.0008726	11.35 ± 1.85	13.99 ± 1.53	0.0694038	13.99 ± 1.53	11.76 ± 1.27
cg08154783	Intergenic	0.0008728	92.88 ± 1.31	91.23 ± 1.83	0.771848	91.23 ± 1.83	91.03 ± 1.48
cg18025558	TRIM50	0.0008744	42.13 ± 1.64	45.1 ± 1.2	0.276465	45.1 ± 1.2	44.12 ± 1.59
cg10721866	GNAQ	0.0008802	95.06 ± 1.06	96.01 ± 0.83	0.491594	96.01 ± 0.83	95.38 ± 1.45
cg02731540	DCDC1;DNAJC24	0.0008809	5.65 ± 0.81	4.7 ± 0.53	0.227149	4.7 ± 0.53	5.05 ± 0.51
cg06720722	TP63;TP63;TP63	0.000884	89.78 ± 1.77	91.86 ± 0.84	0.343969	91.86 ± 0.84	92.65 ± 1.9
cg09647511	TRIP12;TRIP12;TRIP12;TRIP12	0.0008861	93.67 ± 1.2	91.94 ± 1.59	0.967648	91.94 ± 1.59	91.46 ± 3.27
cg01170429	PTPN4	0.0008862	90.1 ± 3.7	93.15 ± 2.79	0.8034	93.15 ± 2.79	93.08 ± 2.08
cg03348161	MS4A3;MS4A3;MS4A3	0.0008869	5.29 ± 1	4.27 ± 0.68	0.87918	4.27 ± 0.68	4.32 ± 1.29
cg02965163	CSNK1A1;CSNK1A1;CSNK1A1	0.0008895	5.98 ± 0.83	4.99 ± 0.84	0.351568	4.99 ± 0.84	5.39 ± 0.67
cg18110758	HIRIP3;HIRIP3;INO80E;INO80E;INO80E;INO80E;INO80E;INO80E;INO80E;INO80E	0.0008899	6.78 ± 0.58	5.49 ± 0.53	0.275976	5.49 ± 0.53	6.3 ± 1.51
cg11659111	Intergenic	0.00089	3.86 ± 0.41	3.36 ± 0.49	0.761992	3.36 ± 0.49	3.43 ± 0.45
cg16540829	SLC15A4	0.0008908	93.35 ± 0.66	91.21 ± 1.41	0.439112	91.21 ± 1.41	91.8 ± 0.85
cg02891306	PRPS2;PRPS2;PRPS2;PRPS2	0.0008994	9.41 ± 0.96	8.36 ± 0.79	0.203471	8.36 ± 0.79	9.48 ± 1.84
cg03469521	CA7;CA7	0.0008998	3.86 ± 0.27	4.53 ± 0.16	0.684405	4.53 ± 0.16	4.45 ± 0.89
cg01071185	Intergenic	0.0008999	52.54 ± 4.77	57.01 ± 4.51	0.0639161	57.01 ± 4.51	55.73 ± 5.61
cg01657422	WWOX	0.0009011	95.81 ± 0.68	96.78 ± 0.47	0.0958222	96.78 ± 0.47	95.93 ± 0.78
cg04668631	C7orf50;C7orf50;GPR146;C7orf50	0.0009017	90.88 ± 1.16	87.66 ± 1.68	0.0061846	87.66 ± 1.68	90.07 ± 1.43
cg10940157	ERC1;ERC1;ERC1;ERC1;ERC1;ERC1	0.0009038	93.06 ± 0.64	92.12 ± 0.7	0.38457	92.12 ± 0.7	92.47 ± 0.88
cg24639239	FAM118B	0.0009055	92.37 ± 0.98	94.42 ± 0.56	0.752667	94.42 ± 0.56	94.08 ± 1.32
cg13303520	BSDC1;BSDC1;BSDC1;BSDC1	0.0009068	52.2 ± 5.37	53.71 ± 4.93	0.209543	53.71 ± 4.93	52.31 ± 5.08
cg08908381	ANKS1B	0.0009071	94.32 ± 0.56	92.07 ± 0.85	0.35348	92.07 ± 0.85	92.71 ± 1.47
cg06583371	Intergenic	0.0009081	92.65 ± 1.38	90.55 ± 2.05	0.989291	90.55 ± 2.05	90.51 ± 2.23
cg11498860	FMNL3;FMNL3	0.0009093	69.79 ± 2.82	72.3 ± 2.46	0.16251	72.3 ± 2.46	71.23 ± 1.7
cg14439656	Intergenic	0.0009118	87.89 ± 1.99	91.28 ± 0.94	0.171005	91.28 ± 0.94	89.5 ± 2.24
cg18659089	G3BP2;G3BP2;G3BP2;G3BP2;G3BP2	0.0009135	3.17 ± 0.57	1.88 ± 0.36	0.0024346	1.88 ± 0.36	3.04 ± 0.63
cg07359376	IQSEC2;IQSEC2;IQSEC2	0.0009137	86.68 ± 4.12	90.47 ± 2.55	0.0336437	90.47 ± 2.55	87.01 ± 4.11
cg03022453	SLC35F1	0.0009142	85.88 ± 2.76	82.39 ± 2.73	0.248146	82.39 ± 2.73	84.52 ± 2.08
cg17011300	ESRRG;ESRRG;ESRRG	0.0009151	94.79 ± 0.67	92.48 ± 0.82	0.0676228	92.48 ± 0.82	94.05 ± 1.65
cg21467206	TENC1;TENC1;TENC1	0.0009159	88.43 ± 1.22	90.6 ± 1.08	0.359979	90.6 ± 1.08	89.83 ± 1.31
cg02671126	Intergenic	0.000921	5.82 ± 0.81	4.69 ± 0.54	0.118622	4.69 ± 0.54	5.39 ± 0.56
cg09287328	Intergenic	0.0009214	90.61 ± 1.36	89.45 ± 1.3	0.0615976	89.45 ± 1.3	91.44 ± 1.49
cg04993441	FREM3	0.0009223	7.05 ± 0.45	8.86 ± 0.54	0.287792	8.86 ± 0.54	8.13 ± 1.44
cg19903430	MACROD2;MACROD2	0.0009233	71.58 ± 1.25	74.05 ± 1.21	0.054009	74.05 ± 1.21	72.68 ± 1.24
cg20525258	Intergenic	0.0009241	93.09 ± 1.18	94.52 ± 1.24	0.890539	94.52 ± 1.24	94.36 ± 1.47
cg01822203	GJA4;GJA4	0.0009242	5.04 ± 0.66	6.94 ± 0.8	0.113209	6.94 ± 0.8	6.14 ± 0.67
cg02282369	Intergenic	0.0009253	42.34 ± 1.26	44.07 ± 1.07	0.819823	44.07 ± 1.07	43.87 ± 1.61
cg22379609	CHGB	0.0009255	86.22 ± 0.55	88.21 ± 0.47	0.686457	88.21 ± 0.47	87.79 ± 1.95
cg12788328	Intergenic	0.0009305	6.11 ± 0.8	7.83 ± 1.47	0.300797	7.83 ± 1.47	6.85 ± 0.77
cg02026242	B3GNTL1	0.0009314	95.98 ± 0.68	97.12 ± 0.46	0.0032861	97.12 ± 0.46	95.96 ± 0.67
cg12417308	FUBP1	0.0009334	3.49 ± 0.38	4.88 ± 0.26	0.351067	4.88 ± 0.26	4.52 ± 0.9
cg10634568	Intergenic	0.0009359	41.95 ± 1.58	45.52 ± 1.63	0.147802	45.52 ± 1.63	43.85 ± 2.39
cg15342873	Intergenic	0.000936	92.57 ± 0.42	95.17 ± 0.62	0.0540678	95.17 ± 0.62	93.68 ± 1.17
cg23956499	SDCCAG8	0.0009367	94.57 ± 0.92	92.25 ± 1.36	0.179454	92.25 ± 1.36	93.47 ± 1.21
cg14750192	Intergenic	0.0009372	6.56 ± 0.69	8.59 ± 1.43	0.35591	8.59 ± 1.43	7.87 ± 1.05
cg15549810	SLC8A1	0.0009378	86.62 ± 1.52	88.02 ± 1.26	0.150918	88.02 ± 1.26	86.5 ± 2.13
cg19092476	Intergenic	0.00094	86.86 ± 1.26	85.54 ± 1.22	0.321359	85.54 ± 1.22	84.4 ± 2.25
cg12039910	NIPA1;NIPA1	0.0009408	95.82 ± 0.53	94.69 ± 0.69	0.0262253	94.69 ± 0.69	95.57 ± 0.55
cg01664094	SIN3A	0.0009428	4.06 ± 0.55	3.45 ± 0.4	0.671507	3.45 ± 0.4	3.56 ± 0.31
cg02866168	RNF169	0.0009437	92.63 ± 1.69	89.71 ± 2.87	0.19848	89.71 ± 2.87	91.03 ± 1.79
cg22755839	ATP1A3;ATP1A3;ATP1A3	0.0009442	74.88 ± 1.68	76.98 ± 1.56	0.0727524	76.98 ± 1.56	74.73 ± 2.51
cg09288374	MED24;MED24;MED24;MED24	0.0009466	2.91 ± 0.26	2.54 ± 0.12	0.225933	2.54 ± 0.12	2.8 ± 0.44
cg26399201	ANKRD43	0.0009484	6.08 ± 0.92	4.69 ± 0.74	0.509263	4.69 ± 0.74	5.08 ± 0.96
cg05631109	SEC14L4;SEC14L4	0.0009502	34.93 ± 2	36.84 ± 2.21	0.0033096	36.84 ± 2.21	34.09 ± 1.87
cg01353522	WNK1;WNK1;WNK1;WNK1	0.0009507	88.04 ± 1.32	91.56 ± 1.28	0.385931	91.56 ± 1.28	90.14 ± 2.15
cg19678610	ANKRD55	0.0009527	13.57 ± 1.67	10.91 ± 1.09	0.0478741	10.91 ± 1.09	12.74 ± 1.57
cg02476190	Intergenic	0.0009547	43.98 ± 7.99	47.63 ± 7.77	0.0786447	47.63 ± 7.77	44.48 ± 6.73
cg06492005	Intergenic	0.000957	94 ± 0.77	91.62 ± 1.44	0.306087	91.62 ± 1.44	92.49 ± 0.91
cg01373667	GALNT18	0.0009587	86.82 ± 2.59	84.8 ± 2.45	0.255112	84.8 ± 2.45	86.15 ± 1.04
cg07068956	ZAN;ZAN	0.0009598	13.66 ± 1.85	10.83 ± 1.51	0.64635	10.83 ± 1.51	11.62 ± 2.47
cg16914149	Intergenic	0.0009612	49.81 ± 1.78	52.2 ± 1.22	0.667701	52.2 ± 1.22	51.86 ± 1.42
cg25021325	Intergenic	0.0009614	35.25 ± 2.91	36.99 ± 3.44	0.844639	36.99 ± 3.44	37.27 ± 3.58
cg17097846	CCDC179	0.0009634	84.11 ± 2.06	87.2 ± 0.87	0.827285	87.2 ± 0.87	86.72 ± 2.84
cg10818096	Intergenic	0.0009645	89.56 ± 1.01	91.39 ± 1.13	0.133687	91.39 ± 1.13	92.48 ± 1.13
cg22870373	MAD1L1;MAD1L1;MAD1L1	0.0009658	90.51 ± 1.5	88.2 ± 1.55	0.0772442	88.2 ± 1.55	89.14 ± 1.91
cg04686012	ZNF323;ZNF323;ZNF323;ZNF323;ZNF323;ZNF323	0.0009678	59.29 ± 2.19	55.09 ± 2.25	0.702757	55.09 ± 2.25	55.54 ± 2.6
cg21923884	DEGS2	0.0009682	5.9 ± 0.66	5.03 ± 0.41	0.358247	5.03 ± 0.41	5.61 ± 1.29
cg04798619	ITGA9	0.0009703	70.53 ± 0.69	73.89 ± 1.27	0.0074106	73.89 ± 1.27	71.92 ± 1.08
cg07981471	COX19	0.0009733	24.5 ± 4.14	27.57 ± 4.65	0.0622121	27.57 ± 4.65	25.99 ± 4.99
cg13648682	BRD3	0.0009772	5 ± 0.92	4.1 ± 0.53	0.0001722	4.1 ± 0.53	5.38 ± 0.46
cg04537557	PPP3CC;PPP3CC;PPP3CC	0.0009775	93.32 ± 0.94	96.28 ± 0.95	0.0491516	96.28 ± 0.95	94.87 ± 1.27
cg06719495	SEC31A;SEC31A;SEC31A;SEC31A;SEC31A	0.000978	92.07 ± 1.69	87.23 ± 3.31	0.260926	87.23 ± 3.31	90.12 ± 3.65
cg18905952	NRBP1	0.0009794	5.12 ± 1.11	3.7 ± 0.67	0.70154	3.7 ± 0.67	3.78 ± 0.48
cg17034181	SLC30A7;SLC30A7	0.0009795	14.6 ± 0.81	16.22 ± 0.89	0.199228	16.22 ± 0.89	15.04 ± 2.24
cg21462732	MAP7	0.0009853	4.39 ± 1.14	5.75 ± 1.13	0.774683	5.75 ± 1.13	6.02 ± 1.36
cg25575883	SLC25A18;SLC25A18	0.0009853	77.73 ± 1.18	76.18 ± 0.99	0.871899	76.18 ± 0.99	75.95 ± 2.56
cg05022059	Intergenic	0.0009871	25.9 ± 2.29	27.75 ± 2.29	0.0558263	27.75 ± 2.29	26.65 ± 2.08
cg23457166	C6orf174	0.0009898	93.81 ± 0.81	95.24 ± 0.58	0.842827	95.24 ± 0.58	94.97 ± 1.55
cg03247748	Intergenic	0.0009912	60.65 ± 1.22	62.69 ± 1.6	0.683126	62.69 ± 1.6	62.02 ± 2.86
cg24006721	RUNX3;RUNX3	0.0009917	5.35 ± 0.65	6.98 ± 1.07	0.108692	6.98 ± 1.07	6 ± 0.77
cg23684520	ZNF541	0.000992	90.58 ± 1.95	86.72 ± 2.57	0.877082	86.72 ± 2.57	87.04 ± 1.53
cg07297251	Intergenic	0.0009948	59.09 ± 1.89	64.46 ± 2.84	0.100068	64.46 ± 2.84	60.4 ± 2.38
cg11437613	ZCCHC7;ZCCHC7;ZCCHC7;ZCCHC7;ZCCHC7	0.0009974	23.44 ± 2.1	26 ± 2.73	0.753425	26 ± 2.73	25.66 ± 3.08
cg08278539	Intergenic	0.0010005	78.8 ± 2.58	80.99 ± 2.09	0.382101	80.99 ± 2.09	79.43 ± 4.08
cg09383910	Intergenic	0.0010032	20.19 ± 5.5	24.78 ± 5.97	0.108519	24.78 ± 5.97	21.31 ± 5.24
cg07312485	ZNF598	0.0010046	82.27 ± 0.85	81.22 ± 0.79	0.306063	81.22 ± 0.79	81.94 ± 1.63
cg27263151	MVK;MVK	0.0010047	10.43 ± 1.16	13.19 ± 2.04	0.0039769	13.19 ± 2.04	11.24 ± 2.04
cg02614804	CRADD;LOC101928731;LOC101928731	0.0010073	84.18 ± 1.94	82.04 ± 1.84	0.95172	82.04 ± 1.84	81.95 ± 2.23
cg26777826	SBF2	0.001008	94.37 ± 0.96	95.73 ± 0.94	0.206126	95.73 ± 0.94	94.75 ± 1.6
cg13719478	NCRNA00171	0.0010104	91.72 ± 2.12	89.92 ± 2.46	0.499044	89.92 ± 2.46	89.34 ± 0.78
cg12219462	ANXA13;ANXA13	0.0010207	93.7 ± 0.86	95.1 ± 0.93	0.024915	95.1 ± 0.93	93.51 ± 1.06
cg04794465	APOM	0.001024	83.14 ± 3.82	92.57 ± 1.33	0.103691	92.57 ± 1.33	89.78 ± 3.8
cg21325563	DERA;DERA;DERA;DERA	0.0010248	3.67 ± 0.36	5.11 ± 0.76	0.131882	5.11 ± 0.76	4.23 ± 0.68
cg08132931	ADD2;ADD2;ADD2;ADD2;ADD2	0.0010275	4.08 ± 0.51	3.46 ± 0.49	0.238436	3.46 ± 0.49	3.83 ± 0.46
cg27564234	SERPINA12;SERPINA12	0.0010305	63.61 ± 1.82	66.4 ± 2.64	0.800796	66.4 ± 2.64	66.03 ± 3.6
cg18239724	Intergenic	0.0010319	68.48 ± 5.43	72.01 ± 4.25	0.44053	72.01 ± 4.25	70.86 ± 3.54
cg19161424	FMN1	0.0010322	40.65 ± 2.98	43.05 ± 2.65	0.413049	43.05 ± 2.65	42.65 ± 3.03
cg08298207	FNDC5;FNDC5;FNDC5	0.0010329	49.78 ± 1.24	52.94 ± 1.22	0.163492	52.94 ± 1.22	51.7 ± 2.41
cg24060954	NDUFA5	0.0010334	7.05 ± 1.11	9.18 ± 1.47	0.800793	9.18 ± 1.47	8.9 ± 1.15
cg13407139	GCK	0.0010355	94.49 ± 0.86	92.36 ± 1.19	0.185662	92.36 ± 1.19	93.63 ± 1.03
cg04131784	CYFIP2;CYFIP2;CYFIP2;CYFIP2	0.001036	91.54 ± 0.64	88.13 ± 0.66	0.0428287	88.13 ± 0.66	89.1 ± 0.84
cg08972701	SLIT1	0.0010391	88.06 ± 1.51	90.68 ± 1.36	0.0399455	90.68 ± 1.36	88.11 ± 2.11
cg00412368	FGF13;FGF13;FGF13	0.0010399	7.53 ± 0.56	6.32 ± 0.73	0.668583	6.32 ± 0.73	6.13 ± 0.91
cg06245825	PDLIM5;PDLIM5;PDLIM5;PDLIM5;PDLIM5;PDLIM5;PDLIM5;PDLIM5	0.0010419	91.12 ± 0.76	89.27 ± 1.02	0.246687	89.27 ± 1.02	90.17 ± 2.48
cg03822722	JADE2;JADE2;JADE2;JADE2;JADE2	0.0010448	5.12 ± 0.39	4.71 ± 0.39	0.484585	4.71 ± 0.39	5.05 ± 0.9
cg09555544	Intergenic	0.0010453	11.54 ± 0.47	12.4 ± 0.39	0.367098	12.4 ± 0.39	11.81 ± 1.72
cg19558170	ADAMTSL3;ADAMTSL3	0.001046	61.74 ± 2.18	64.39 ± 1.44	0.300471	64.39 ± 1.44	63.42 ± 1.95
cg07235805	PARD6G	0.0010483	67.36 ± 2.14	70.13 ± 1.37	0.316115	70.13 ± 1.37	69.26 ± 2.57
cg12357497	CHD7	0.0010489	2.68 ± 0.56	3.94 ± 0.45	0.3905	3.94 ± 0.45	3.8 ± 0.57
cg00615268	Intergenic	0.0010512	64.24 ± 2.71	65.9 ± 2.78	0.832825	65.9 ± 2.78	65.57 ± 4.83
cg12444840	DDX24;IFI27L1;IFI27L1	0.001052	4.93 ± 0.66	3.81 ± 0.41	0.0599111	3.81 ± 0.41	4.37 ± 0.79
cg20333001	HDLBP;HDLBP	0.001052	91.35 ± 1.16	92.83 ± 0.85	0.091757	92.83 ± 0.85	91.75 ± 0.81
cg23484150	HSPA9;HSPA9	0.0010535	24.35 ± 3.73	26.28 ± 3.81	0.719156	26.28 ± 3.81	26.69 ± 4.93
cg08039689	HMGN4	0.0010543	5.07 ± 0.58	4.39 ± 0.54	0.869355	4.39 ± 0.54	4.5 ± 0.86
cg06034029	ADGRD1	0.0010568	93.32 ± 0.32	94.46 ± 0.35	0.200053	94.46 ± 0.35	93.57 ± 1.27
cg12327749	MRPL22;MRPL22	0.00106	89.78 ± 2.13	92.15 ± 1.68	0.332174	92.15 ± 1.68	91.49 ± 1.43
cg26237705	ATL1;ATL1;ATL1	0.0010607	88.86 ± 2.75	91.47 ± 1.88	0.547508	91.47 ± 1.88	92.05 ± 3.35
cg03949391	PTGFR;PTGFR;PTGFR;PTGFR	0.0010613	3.61 ± 0.26	4.76 ± 0.3	0.567301	4.76 ± 0.3	4.59 ± 1.01
cg04165583	Intergenic	0.0010628	7.77 ± 0.83	8.78 ± 1.08	0.0873119	8.78 ± 1.08	7.76 ± 0.46
cg14255824	TJP2;TJP2;TJP2;TJP2	0.0010634	91.71 ± 1.32	89.65 ± 1.32	0.355079	89.65 ± 1.32	90.2 ± 0.95
cg05780479	KIAA1217;KIAA1217;KIAA1217;KIAA1217	0.0010655	94.45 ± 0.81	92.43 ± 0.74	0.146993	92.43 ± 0.74	94.07 ± 1.93
cg09193002	GALNT13	0.001066	55 ± 0.98	56.91 ± 1.18	0.778715	56.91 ± 1.18	56.53 ± 3.36
cg25829531	Intergenic	0.0010663	5.21 ± 0.55	6.51 ± 0.57	0.106462	6.51 ± 0.57	5.9 ± 0.23
cg10724442	SPTBN4;BLVRB	0.0010672	2.61 ± 0.32	3.37 ± 0.27	0.956435	3.37 ± 0.27	3.38 ± 0.53
cg10134312	Intergenic	0.0010676	5.27 ± 0.43	4.61 ± 0.42	0.408105	4.61 ± 0.42	4.86 ± 0.54
cg00873414	PTP4A1	0.0010686	38.54 ± 3.28	41.78 ± 2.63	0.0413104	41.78 ± 2.63	40.41 ± 3.19
cg21668338	AURKA;AURKA;AURKA;AURKA;AURKA;AURKA;CSTF1;CSTF1;CSTF1;CSTF1	0.00107	5.24 ± 0.6	4.57 ± 0.39	0.884192	4.57 ± 0.39	4.6 ± 0.3
cg02715913	PPP2R2C;PPP2R2C	0.0010704	87.76 ± 0.92	89.44 ± 0.99	0.265577	89.44 ± 0.99	88.64 ± 1.07
cg05844117	RHEB	0.0010738	90.25 ± 0.59	87.24 ± 0.63	0.0697115	87.24 ± 0.63	89.17 ± 2.22
cg24859446	Intergenic	0.0010747	17.22 ± 1.64	20.3 ± 1.71	0.291007	20.3 ± 1.71	19.08 ± 1.54
cg16640903	TEAD1	0.0010762	8.89 ± 1.96	7 ± 1.12	0.970867	7 ± 1.12	7.14 ± 1.67
cg21409895	OMA1;OMA1	0.0010785	5.45 ± 0.46	4.76 ± 0.5	0.483098	4.76 ± 0.5	4.6 ± 0.53
cg14708080	KCNJ6	0.0010797	16.26 ± 3.42	17.6 ± 3.9	0.303758	17.6 ± 3.9	16.41 ± 1.71
cg15475168	CUX1;CUX1;CUX1;CUX1;CUX1;CUX1;CUX1	0.001084	83.9 ± 1.48	87.48 ± 1.77	0.12065	87.48 ± 1.77	85.87 ± 1.93
cg22399511	ATP6V0C;ATP6V0C	0.0010845	59.05 ± 1.82	60.46 ± 1.53	0.720834	60.46 ± 1.53	60.02 ± 1.69
cg02232206	Intergenic	0.0010859	95.78 ± 0.98	94.54 ± 0.93	0.556798	94.54 ± 0.93	94.91 ± 1.11
cg17416507	Intergenic	0.0010861	88.33 ± 1.79	86 ± 1.48	0.927602	86 ± 1.48	85.97 ± 1.17
cg17951736	SLC25A45	0.0010862	92.51 ± 1.44	95.74 ± 1.19	0.57985	95.74 ± 1.19	95.32 ± 1.45
cg11468711	ZNF710	0.0010868	3.93 ± 0.36	3.19 ± 0.42	0.149217	3.19 ± 0.42	3.89 ± 0.68
cg07261946	AFF1	0.001087	96.35 ± 0.73	94.28 ± 0.6	0.114918	94.28 ± 0.6	95.42 ± 1.32
cg08466108	ARNTL2-AS1	0.0010906	90.33 ± 0.65	92.25 ± 0.6	0.225636	92.25 ± 0.6	90.98 ± 1.75
cg08921414	SIDT2	0.0010946	89.25 ± 0.96	91.48 ± 0.71	0.0504815	91.48 ± 0.71	92.73 ± 1.41
cg15056247	DSE;TSPYL1;TSPYL1	0.0010968	3.68 ± 0.67	4.9 ± 0.76	0.508064	4.9 ± 0.76	4.58 ± 0.85
cg10772290	PTGIS	0.0010984	12.46 ± 0.78	13.04 ± 1	0.861549	13.04 ± 1	12.98 ± 1.38
cg16872560	PPP1R9A;PPP1R9A;PPP1R9A;PPP1R9A	0.0011	4.78 ± 0.66	3.78 ± 0.4	0.10242	3.78 ± 0.4	3.37 ± 0.41
cg00194044	Intergenic	0.0011014	81.07 ± 1.28	83.87 ± 0.75	0.978815	83.87 ± 0.75	83.76 ± 2.18
cg04780837	Intergenic	0.0011023	7.91 ± 0.36	6.67 ± 0.43	0.167667	6.67 ± 0.43	5.99 ± 1.25
cg25809394	CCDC14;CCDC14	0.0011027	94.1 ± 0.73	95.91 ± 0.55	0.261151	95.91 ± 0.55	94.65 ± 1.97
cg02185666	NRP2;NRP2;NRP2;NRP2;NRP2;NRP2	0.0011037	76.9 ± 6.33	79.44 ± 5.39	0.0855601	79.44 ± 5.39	77.51 ± 6.45
cg12441318	OR6F1	0.0011043	7.03 ± 0.96	10 ± 1.02	0.114949	10 ± 1.02	8.62 ± 1.41
cg25557995	CACNA1C;CACNA1C;CACNA1C;CACNA1C;CACNA1C;CACNA1C;CACNA1C;CACNA1C;CACNA1C;CACNA1C;CACNA1C;CACNA1C;CACNA1C;CACNA1C;CACNA1C;CACNA1C;CACNA1C;CACNA1C;CACNA1C;CACNA1C;CACNA1C;CACNA1C;CACNA1C	0.0011059	89.34 ± 2.86	90.69 ± 2.3	0.351755	90.69 ± 2.3	89.91 ± 1.65
cg11387088	CUEDC1	0.0011079	80.01 ± 1.48	82.05 ± 1.12	0.191554	82.05 ± 1.12	80.24 ± 2.26
cg10570745	AOX2P	0.0011081	87.09 ± 1.97	85.6 ± 2.22	0.295306	85.6 ± 2.22	86.64 ± 1.67
cg21709126	NCK2;NCK2;NCK2	0.0011081	89.82 ± 1.99	91.17 ± 1.55	0.838826	91.17 ± 1.55	91.07 ± 0.77
cg27333178	NFKB1;NFKB1	0.0011092	10.22 ± 2.56	13.88 ± 3.02	0.0426177	13.88 ± 3.02	11.34 ± 2.48
cg00778086	SLC9A1;SLC9A1	0.0011113	63.81 ± 1.2	65.33 ± 1.47	0.794006	65.33 ± 1.47	65.5 ± 1.19
cg07425646	Intergenic	0.0011123	5.22 ± 1.15	3.85 ± 0.72	0.54093	3.85 ± 0.72	4.04 ± 0.43
cg18593590	MTURN	0.0011133	83.19 ± 2.92	86.09 ± 1.94	0.157068	86.09 ± 1.94	84.4 ± 2.59
cg06624358	SAMD11	0.0011147	18.73 ± 2.46	15.2 ± 2.28	0.6755	15.2 ± 2.28	15.87 ± 2.08
cg04890457	Intergenic	0.001115	5.22 ± 0.55	4.29 ± 0.42	0.39398	4.29 ± 0.42	4.48 ± 0.51
cg15440973	FAM158A;FAM158A	0.0011152	4.49 ± 0.52	3.36 ± 0.23	0.0799862	3.36 ± 0.23	3.92 ± 0.58
cg04599071	FREM1;FREM1	0.0011155	64.95 ± 2.35	69.04 ± 2.54	0.0169112	69.04 ± 2.54	64.97 ± 1.36
cg22241571	FGF12	0.0011161	94.24 ± 0.98	95.61 ± 0.65	0.144062	95.61 ± 0.65	95.14 ± 0.6
cg13551505	CACNA2D4	0.0011188	7.73 ± 1	5.41 ± 1.01	0.10735	5.41 ± 1.01	6.52 ± 1.39
cg11077561	DLG1;DLG1	0.0011198	3.62 ± 0.46	3.06 ± 0.4	0.486876	3.06 ± 0.4	3.29 ± 0.56
cg07047026	KIAA0368	0.0011222	90.04 ± 3.37	94.13 ± 1.09	0.253342	94.13 ± 1.09	92.6 ± 2.65
cg08014182	RPS18	0.0011227	87.31 ± 2.08	89.72 ± 1.64	0.138902	89.72 ± 1.64	87.67 ± 2.3
cg03498641	MUC22	0.0011231	49.47 ± 0.89	50.86 ± 0.9	0.127983	50.86 ± 0.9	49.54 ± 1.62
cg22404498	RFPL2;RFPL2	0.0011236	38.11 ± 1.51	40.65 ± 1.67	0.724383	40.65 ± 1.67	40.97 ± 0.79
cg14347463	Intergenic	0.0011237	38.63 ± 3.24	44.3 ± 3.6	0.0267437	44.3 ± 3.6	41.48 ± 3.2
cg03547446	GPSM3;NOTCH4	0.0011248	3.64 ± 0.54	2.62 ± 0.38	0.657938	2.62 ± 0.38	3.01 ± 1.05
cg23845773	TAF10	0.0011273	3.02 ± 0.62	4.07 ± 0.97	0.127663	4.07 ± 0.97	2.97 ± 0.77
cg00068174	RDH11;RDH11	0.0011283	91.68 ± 0.97	93.63 ± 0.93	0.0739211	93.63 ± 0.93	92.38 ± 1.13
cg26168383	Intergenic	0.0011307	76.34 ± 2.27	72.32 ± 2.44	0.123633	72.32 ± 2.44	75.49 ± 3.01
cg20674638	ITGA2	0.0011309	13.64 ± 1.96	11.54 ± 2.32	0.391295	11.54 ± 2.32	12.64 ± 1.26
cg04059519	LINC01333	0.0011326	34.41 ± 1.02	36.06 ± 0.84	0.956341	36.06 ± 0.84	36.04 ± 2.84
cg23684898	RBFOX3	0.0011348	83.35 ± 1.6	84.77 ± 1.72	0.697685	84.77 ± 1.72	85.01 ± 2.13
cg02922660	MUC2	0.0011356	8.8 ± 0.94	10.26 ± 1.26	0.0261707	10.26 ± 1.26	8.35 ± 0.95
cg08032971	DMBX1;DMBX1	0.0011395	83.62 ± 1.3	85.47 ± 0.94	0.0089914	85.47 ± 0.94	83.89 ± 1.12
cg03248620	CD163;CD163;CD163;CD163	0.0011422	5.83 ± 1.05	4.95 ± 0.99	0.0402407	4.95 ± 0.99	6.23 ± 1.14
cg25333386	RHOQ	0.0011427	59.03 ± 1.94	61.04 ± 2.29	0.666662	61.04 ± 2.29	60.63 ± 1.82
cg03888365	ZHX2	0.0011457	5.96 ± 0.25	5.38 ± 0.26	0.641703	5.38 ± 0.26	5.62 ± 0.79
cg07201861	RBM47;RBM47	0.0011536	93.8 ± 1.08	92.26 ± 1.03	0.714205	92.26 ± 1.03	92.5 ± 1.16
cg13367222	MAGEB17;MAGEB17	0.0011566	90.92 ± 2.6	93.03 ± 1.75	0.793754	93.03 ± 1.75	93.37 ± 1.14
cg15609186	Intergenic	0.001157	7.1 ± 1.44	10.11 ± 3.05	0.0615556	10.11 ± 3.05	6.73 ± 1.51
cg11894282	Intergenic	0.0011583	31.42 ± 1.83	33.54 ± 1.62	0.107685	33.54 ± 1.62	32.14 ± 1.03
cg21516339	EPRS;RNU5F-1	0.001162	91.18 ± 1.08	92.21 ± 1.06	0.468732	92.21 ± 1.06	91.98 ± 1.22
cg04916200	RIC8B	0.0011632	4.04 ± 0.4	4.77 ± 0.56	0.670168	4.77 ± 0.56	4.58 ± 0.69
cg09938881	PGBD5	0.0011639	93.72 ± 1.46	95.13 ± 0.92	0.478122	95.13 ± 0.92	94.84 ± 1.05
cg22063316	GPHN;GPHN	0.001164	90.92 ± 1.29	87.59 ± 1.39	0.0012323	87.59 ± 1.39	91.06 ± 0.78
cg24546153	SNRPE	0.0011646	7.76 ± 0.61	6.43 ± 0.65	0.04232	6.43 ± 0.65	8.04 ± 1.12
cg07653913	XYLT1	0.0011652	46.5 ± 1.56	48.38 ± 1.84	0.448387	48.38 ± 1.84	47.51 ± 1.75
cg11145632	AP1B1;AP1B1;AP1B1	0.0011688	12.8 ± 1.39	14.86 ± 2.06	0.477849	14.86 ± 2.06	13.92 ± 1.6
cg04124042	Intergenic	0.0011693	95.23 ± 0.94	93.31 ± 1.14	0.150237	93.31 ± 1.14	94.78 ± 1.6
cg16395102	Intergenic	0.0011719	30.79 ± 0.83	29.28 ± 0.98	0.50478	29.28 ± 0.98	28.99 ± 0.68
cg23081357	Intergenic	0.0011739	33.08 ± 2.69	34.54 ± 3	0.0320191	34.54 ± 3	32.31 ± 3.16
cg25033719	Intergenic	0.0011746	49.92 ± 2.66	53.28 ± 1.98	0.256461	53.28 ± 1.98	52.12 ± 3.23
cg25122204	LINC01340	0.0011746	92.79 ± 2.2	89.97 ± 2.11	0.0595814	89.97 ± 2.11	92.35 ± 1.15
cg04155026	TSNAXIP1;TSNAXIP1;RANBP10	0.0011755	2.49 ± 0.25	2.8 ± 0.2	0.0121815	2.8 ± 0.2	2.12 ± 0.52
cg12004183	Intergenic	0.0011764	4.21 ± 0.47	5.21 ± 0.78	0.105366	5.21 ± 0.78	4.32 ± 0.79
cg06794857	AACS	0.0011774	5.79 ± 0.58	6.58 ± 0.55	0.151039	6.58 ± 0.55	5.88 ± 0.76
cg10824792	MIR7852;VAV3	0.0011774	90.11 ± 1.2	87.19 ± 1.83	0.177122	87.19 ± 1.83	87.92 ± 1.61
cg19596802	PAK6;PAK6;PAK6;PAK6;PAK6	0.0011793	65.52 ± 1.08	67.88 ± 1.12	0.44968	67.88 ± 1.12	67.35 ± 1.11
cg22373770	Intergenic	0.001181	57.31 ± 1.71	59.24 ± 1.65	0.0363493	59.24 ± 1.65	57.62 ± 0.73
cg24322638	PRR3;PRR3;PRR3;GNL1;PRR3;GNL1	0.0011818	5.01 ± 0.22	4.25 ± 0.2	0.219329	4.25 ± 0.2	4.83 ± 0.85
cg18356159	PLIN3;PLIN3;PLIN3	0.0011861	7.04 ± 0.62	5.67 ± 0.47	0.474869	5.67 ± 0.47	6.09 ± 1.06
cg07095459	RB1CC1;RB1CC1	0.0011883	3.95 ± 0.39	2.8 ± 0.39	0.166311	2.8 ± 0.39	3.26 ± 0.41
cg09567854	Intergenic	0.0011889	38.08 ± 2.09	41.21 ± 2.3	0.0032664	41.21 ± 2.3	39.41 ± 2.23
cg02376288	INPP5K;INPP5K;INPP5K;PITPNA	0.0011895	90.42 ± 0.94	88.29 ± 1.6	0.653914	88.29 ± 1.6	88.68 ± 0.86
cg27176729	IER5	0.0011898	96.09 ± 1.21	94.4 ± 1.87	0.827042	94.4 ± 1.87	94.68 ± 1.09
cg18196453	RNF217	0.0011918	46.35 ± 3.21	49.28 ± 3.36	0.0406136	49.28 ± 3.36	46.75 ± 3.29
cg23861715	CDC14B;CDC14B	0.0011943	6.04 ± 1.2	4.92 ± 0.76	0.252035	4.92 ± 0.76	5.8 ± 1.58
cg14563201	KLRD1;KLRD1;KLRD1	0.001195	24.65 ± 1.71	27.35 ± 2.26	0.395729	27.35 ± 2.26	26.49 ± 2.9
cg15370808	EPB41L5;EPB41L5;EPB41L5;EPB41L5	0.0011951	4.71 ± 0.62	6.16 ± 1.08	0.678837	6.16 ± 1.08	5.83 ± 1.22
cg00509451	SAC3D1	0.0011958	89.3 ± 0.98	88.19 ± 1.32	0.607345	88.19 ± 1.32	88.42 ± 1.08
cg02822089	KIF5B	0.001196	70.23 ± 8.62	80.45 ± 5.7	0.0064457	80.45 ± 5.7	72.38 ± 5.03
cg06352398	Intergenic	0.0011966	84.38 ± 1.87	86.62 ± 1.78	0.398438	86.62 ± 1.78	85.37 ± 2.08
cg14215256	TOX2;TOX2;TOX2;TOX2	0.0011972	5.17 ± 1.32	6.45 ± 2.07	0.0256913	6.45 ± 2.07	5.54 ± 1.84
cg16235582	ODZ4	0.0011989	9.65 ± 1.2	11.58 ± 1.98	0.434104	11.58 ± 1.98	10.9 ± 1.58
cg27268936	Intergenic	0.0011989	86.95 ± 3.02	90.91 ± 1.52	0.523855	90.91 ± 1.52	91.56 ± 2.8
cg02362016	MYEF2;MYEF2;MYEF2	0.0011999	90.48 ± 3.09	92.69 ± 1.95	0.684259	92.69 ± 1.95	93.01 ± 1.75
cg25525207	C4orf14;POLR2B	0.0012012	7.93 ± 0.47	7.09 ± 0.51	0.302693	7.09 ± 0.51	7.87 ± 1.67
cg10478199	ATP6V1B1	0.0012015	24.78 ± 4.38	26.78 ± 4.74	0.0645534	26.78 ± 4.74	25.13 ± 5.45
cg07696515	TRIM29	0.0012083	5.06 ± 0.6	4.04 ± 0.26	0.0442001	4.04 ± 0.26	4.53 ± 0.47
cg02835423	Intergenic	0.0012087	19.77 ± 2.4	23.36 ± 2.46	0.343487	23.36 ± 2.46	21.62 ± 4.27
cg03311349	SNRPC;SNRPC	0.0012111	4.03 ± 0.23	3.45 ± 0.14	0.0457623	3.45 ± 0.14	3.81 ± 0.28
cg12861346	LOC102723385;LOC102723385;LOC102723385;COQ7;COQ7;LOC102723385	0.0012123	5.42 ± 1.33	7.8 ± 2.11	0.18634	7.8 ± 2.11	6 ± 1.21
cg12189969	MPP5;MPP5	0.0012126	89 ± 2.69	92.62 ± 2.37	0.426957	92.62 ± 2.37	91.38 ± 1.96
cg26808852	LOC399959	0.0012171	60.92 ± 1.3	62.98 ± 1.13	0.876737	62.98 ± 1.13	62.77 ± 2.13
cg17619145	WWP2;WWP2;WWP2;WWP2	0.0012189	92.67 ± 1.16	95.71 ± 0.84	0.0419476	95.71 ± 0.84	94.45 ± 0.78
cg05509584	NEDD4L;NEDD4L;NEDD4L;NEDD4L;NEDD4L;NEDD4L;NEDD4L;NEDD4L;NEDD4L;NEDD4L	0.001219	61.32 ± 1.52	65.03 ± 2.44	0.737913	65.03 ± 2.44	64.23 ± 3.13
cg22444102	ZNF516	0.0012198	92.99 ± 1.18	90.32 ± 1.43	0.0392159	90.32 ± 1.43	92 ± 2.22
cg16385878	RTN1;RTN1	0.0012223	93.31 ± 1.01	94.32 ± 1.1	0.590641	94.32 ± 1.1	94.79 ± 1.37
cg07452312	GALNT10	0.0012227	66.09 ± 3.22	67.37 ± 2.97	0.145705	67.37 ± 2.97	66.13 ± 1.7
cg11419481	SLC38A4;SLC38A4	0.0012236	11.42 ± 0.58	14.45 ± 1.44	0.304935	14.45 ± 1.44	13.08 ± 2.03
cg02468933	Intergenic	0.0012238	8.91 ± 0.69	11.12 ± 1.22	0.927275	11.12 ± 1.22	11.12 ± 2.06
cg23918935	DPYS	0.0012265	84.1 ± 1.47	85.4 ± 1.04	0.587879	85.4 ± 1.04	84.91 ± 1.56
cg07187585	C17orf48;SCO1	0.0012269	7.58 ± 1.13	5.12 ± 0.79	0.0674862	5.12 ± 0.79	6.34 ± 1.09
cg24860562	Intergenic	0.0012276	62.39 ± 2.08	64.82 ± 1.46	0.865248	64.82 ± 1.46	64.7 ± 1.45
cg00387426	Intergenic	0.0012286	29.09 ± 2.93	31.54 ± 3.05	0.933683	31.54 ± 3.05	31.49 ± 3.72
cg17335108	Intergenic	0.0012322	64.09 ± 1.85	66.73 ± 1.41	0.404474	66.73 ± 1.41	65.83 ± 2.25
cg10924277	SSR3;SSR3;SSR3	0.001233	6.46 ± 0.81	7.38 ± 0.75	0.304857	7.38 ± 0.75	6.61 ± 1
cg02039793	FBXL21	0.0012345	62.22 ± 2.7	65.61 ± 1.99	0.146445	65.61 ± 1.99	63.17 ± 2.6
cg23694520	ZNRD1;NCRNA00171;ZNRD1	0.0012351	6.11 ± 0.62	7.89 ± 0.95	0.286287	7.89 ± 0.95	7.16 ± 1.29
cg13119178	CHD5	0.0012385	47.94 ± 0.84	49.41 ± 1.06	0.150657	49.41 ± 1.06	48.46 ± 1.68
cg04864955	SIRT3;SIRT3	0.001239	80.02 ± 3.17	85.3 ± 1.92	0.750987	85.3 ± 1.92	85.78 ± 2.7
cg10600828	ZHX2	0.0012418	85.57 ± 1.47	87.61 ± 1.24	0.0887216	87.61 ± 1.24	85.52 ± 3.33
cg02252265	TMEM201;TMEM201	0.0012424	91.31 ± 1.79	94.07 ± 1.07	0.665143	94.07 ± 1.07	93.87 ± 0.97
cg17408498	Intergenic	0.0012431	8.07 ± 1.4	9.64 ± 1.68	0.556174	9.64 ± 1.68	8.96 ± 1.47
cg10583396	Intergenic	0.0012451	6.99 ± 1.27	9.66 ± 1.02	0.0610493	9.66 ± 1.02	7.67 ± 1.75
cg22982242	Intergenic	0.0012472	69.94 ± 2.42	72.63 ± 1.55	0.580857	72.63 ± 1.55	71.71 ± 2.51
cg22605682	SEC22B	0.0012478	4.2 ± 0.46	5.19 ± 0.47	0.0919452	5.19 ± 0.47	4.78 ± 0.55
cg07747306	SIX6	0.0012485	47.92 ± 2.82	51.66 ± 2.15	0.292962	51.66 ± 2.15	50.22 ± 3.5
cg15706424	Intergenic	0.0012486	14.61 ± 2.06	18.17 ± 2.16	0.0055405	18.17 ± 2.16	15.25 ± 2.87
cg14471560	C2orf64;UNC50	0.0012503	4.7 ± 0.22	4.32 ± 0.21	0.764075	4.32 ± 0.21	4.26 ± 0.6
cg10582152	Intergenic	0.001251	73.13 ± 1.42	75.65 ± 1.36	0.0948415	75.65 ± 1.36	73.76 ± 1.08
cg11747142	FAM71F2;FAM71F2	0.001254	81.32 ± 4.11	87.02 ± 3.41	0.16942	87.02 ± 3.41	84.4 ± 3.86
cg03709474	TMEM187	0.0012545	89.97 ± 2.08	93.19 ± 1.77	0.115707	93.19 ± 1.77	91.92 ± 1.35
cg21496778	PLA2G4A;PLA2G4A	0.0012545	86.42 ± 1.95	89.58 ± 0.64	0.0011028	89.58 ± 0.64	86.21 ± 1.33
cg25992645	Intergenic	0.0012578	7.21 ± 1.49	8.12 ± 1.85	0.958582	8.12 ± 1.85	8.14 ± 1.61
cg04863005	TACSTD2	0.0012591	92.03 ± 0.47	93.66 ± 0.54	0.288541	93.66 ± 0.54	92.95 ± 1.07
cg19904126	MED15;MED15;MED15;MED15;MED15;MED15	0.0012616	81.66 ± 1.31	77.59 ± 0.85	0.0774396	77.59 ± 0.85	79.49 ± 2.07
cg22460989	ZFHX3;ZFHX3	0.0012619	83.89 ± 1.26	84.96 ± 1.52	0.934998	84.96 ± 1.52	85 ± 2.11
cg15920552	NFYC;NFYC;NFYC;NFYC;NFYC;NFYC	0.0012638	92.18 ± 1.81	94.62 ± 1.01	0.998552	94.62 ± 1.01	94.61 ± 1.09
cg11206634	SFT2D3	0.0012647	55.09 ± 1.67	57.43 ± 1.81	0.382237	57.43 ± 1.81	56.5 ± 2.34
cg24842731	TRPC6;TRPC6	0.0012656	7.29 ± 0.67	5.11 ± 0.7	0.044352	5.11 ± 0.7	6.12 ± 0.49
cg12148129	Intergenic	0.0012664	73.43 ± 3.79	76.22 ± 3.36	0.388178	76.22 ± 3.36	76.85 ± 2.87
cg10380163	HMGCLL1;HMGCLL1;HMGCLL1;HMGCLL1;HMGCLL1;HMGCLL1;HMGCLL1	0.0012675	26.68 ± 1.91	28.2 ± 2.1	0.124801	28.2 ± 2.1	25.99 ± 2.49
cg05712271	Intergenic	0.0012686	3.55 ± 0.58	2.94 ± 0.44	0.02657	2.94 ± 0.44	3.86 ± 0.41
cg05352541	PITPNB;LOC284900;LOC284900	0.0012697	2.59 ± 0.24	2.28 ± 0.17	0.0102752	2.28 ± 0.17	2.82 ± 0.52
cg26803725	Intergenic	0.0012709	43.12 ± 1.22	47.48 ± 1.59	0.0242023	47.48 ± 1.59	45.52 ± 1.75
cg19147570	C2orf86;C2orf86;MDH1	0.0012726	2.74 ± 0.56	3.8 ± 0.61	0.47552	3.8 ± 0.61	3.53 ± 0.44
cg03760316	DLGAP1;FLJ35776;DLGAP1	0.0012732	5.31 ± 0.57	6.56 ± 0.43	0.0379233	6.56 ± 0.43	5.49 ± 0.61
cg23666536	PHTF1	0.0012739	89.26 ± 2.13	93.35 ± 2.2	0.0911259	93.35 ± 2.2	91.99 ± 2.34
cg04971742	VPS52	0.0012759	91.36 ± 1.39	92.68 ± 0.79	0.210166	92.68 ± 0.79	93.56 ± 0.86
cg24326857	FAM9B	0.0012761	90.65 ± 2.24	88.96 ± 2.07	0.322823	88.96 ± 2.07	89.86 ± 2.41
cg02238247	Intergenic	0.0012773	86.02 ± 1.59	81.66 ± 1.62	0.136162	81.66 ± 1.62	83.73 ± 3.11
cg07790939	SCIN;SCIN	0.0012781	64.6 ± 1.17	66.65 ± 0.63	0.933833	66.65 ± 0.63	66.7 ± 1.18
cg12225712	CAPG	0.0012781	94.1 ± 0.82	91.96 ± 0.54	0.037408	91.96 ± 0.54	93.27 ± 0.97
cg09694281	ARID1B;ARID1B	0.0012813	74.59 ± 3.06	78.12 ± 2.25	0.703738	78.12 ± 2.25	77.82 ± 3.05
cg01403885	Intergenic	0.0012825	43.7 ± 4.13	49.61 ± 4.29	0.911411	49.61 ± 4.29	49.33 ± 3.65
cg18024260	C1orf159	0.0012841	96.19 ± 0.67	95.65 ± 0.57	0.668225	95.65 ± 0.57	95.82 ± 0.34
cg20543571	C15orf43	0.0012842	68.63 ± 1.23	71.67 ± 0.93	0.697901	71.67 ± 0.93	71.85 ± 1.39
cg07307830	FSIP1	0.001287	92.17 ± 1.54	95.04 ± 0.75	0.0025661	95.04 ± 0.75	91.93 ± 1.21
cg04156536	Intergenic	0.0012884	80.42 ± 5.54	78.07 ± 6.04	0.226614	78.07 ± 6.04	79.13 ± 6.23
cg19811087	Intergenic	0.0012893	5.35 ± 0.8	6.61 ± 0.6	0.53957	6.61 ± 0.6	6.37 ± 0.92
cg15195321	NBLA00301;HAND2	0.00129	4.96 ± 1.31	3.43 ± 0.87	0.127147	3.43 ± 0.87	4.22 ± 0.56
cg23331961	PARP6	0.00129	11.72 ± 1.55	13.97 ± 1.74	0.2416	13.97 ± 1.74	12.5 ± 2.23
cg00868206	TAB2;TAB2;TAB2	0.0012903	91.74 ± 1.99	94.07 ± 1.09	0.198524	94.07 ± 1.09	93.17 ± 1.01
cg14242246	C2orf28;C2orf28;SLC5A6;C2orf28;SLC5A6	0.0012935	5.05 ± 0.65	4.37 ± 0.7	0.321839	4.37 ± 0.7	4.66 ± 0.35
cg04629942	RAVER1	0.0012961	87.28 ± 1	85.12 ± 1.34	0.0651917	85.12 ± 1.34	86.2 ± 1.64
cg24950709	VPS52	0.0012967	88.21 ± 1.4	84.6 ± 1.89	0.122774	84.6 ± 1.89	87.75 ± 2.78
cg07035456	JAK2	0.0012973	4.28 ± 0.53	3.59 ± 0.46	0.107154	3.59 ± 0.46	4.22 ± 0.6
cg00584878	CFAP58	0.0012979	73.88 ± 2.28	70.21 ± 3.07	0.236262	70.21 ± 3.07	71.86 ± 3.43
cg16016288	LRIT3	0.0013025	33.87 ± 2.25	37.03 ± 3.03	0.381263	37.03 ± 3.03	35.8 ± 2.8
cg10553696	Intergenic	0.0013049	71.78 ± 2.79	75.85 ± 3.37	0.0169866	75.85 ± 3.37	71.44 ± 2.04
cg17645165	Intergenic	0.0013077	14.65 ± 2.76	17.44 ± 2.87	0.17176	17.44 ± 2.87	14.06 ± 2.77
cg16604975	MAGI1;MAGI1;MAGI1	0.0013081	89.92 ± 1.43	88.56 ± 1.56	0.940956	88.56 ± 1.56	88.59 ± 1.65
cg02639111	CDK8	0.0013088	92.41 ± 1.34	90.16 ± 1.81	0.135517	90.16 ± 1.81	91.8 ± 1.48
cg02010829	ABCC1;ABCC1;ABCC1;ABCC1;ABCC1	0.0013094	83.34 ± 1.59	84.93 ± 1.51	0.708978	84.93 ± 1.51	84.35 ± 2.39
cg14647543	RBM17;RBM17	0.0013098	75.2 ± 3.43	78.7 ± 3.25	0.986357	78.7 ± 3.25	78.86 ± 1.44
cg24789128	SCN9A	0.0013101	3.76 ± 0.32	4.86 ± 0.53	0.203527	4.86 ± 0.53	4.19 ± 1.43
cg03937290	Intergenic	0.0013116	9.56 ± 0.84	11.32 ± 0.7	0.0233557	11.32 ± 0.7	10.34 ± 0.84
cg11388130	TMEM198B;TMEM198B;TMEM198B;TMEM198B	0.0013119	93.85 ± 1.97	92 ± 2.13	0.227815	92 ± 2.13	93.13 ± 1.38
cg20090108	GRM5;GRM5	0.0013179	4.94 ± 0.18	6.45 ± 0.66	0.0677084	6.45 ± 0.66	5.28 ± 0.69
cg08332145	RFPL3;RFPL3	0.0013189	80.06 ± 1.66	83.21 ± 1.67	0.100375	83.21 ± 1.67	80.65 ± 2.15
cg17358924	Intergenic	0.0013198	73.27 ± 0.51	74.02 ± 0.36	0.841574	74.02 ± 0.36	73.9 ± 1.24
cg15084618	TUB	0.0013227	77.76 ± 0.74	75.74 ± 1.15	0.024061	75.74 ± 1.15	78.89 ± 1.52
cg13715276	SEC61A1	0.0013238	91.26 ± 2.28	93.62 ± 1.6	0.743345	93.62 ± 1.6	93.28 ± 1.46
cg21048927	TRIP12;FBXO36	0.0013273	5.76 ± 1.27	7.94 ± 1.13	0.238986	7.94 ± 1.13	7.08 ± 0.38
cg12643109	DDRGK1;DDRGK1	0.0013289	91.24 ± 0.7	89.44 ± 0.78	0.150657	89.44 ± 0.78	90.44 ± 1.06
cg17677112	PHTF2;PHTF2;TMEM60	0.0013289	4.88 ± 0.48	5.8 ± 0.67	0.49833	5.8 ± 0.67	5.45 ± 1.16
cg15600889	SNUPN;SNUPN;SNUPN	0.0013296	92.3 ± 1.17	94.27 ± 0.53	0.0219016	94.27 ± 0.53	93.03 ± 0.97
cg20168751	FAM149A	0.0013329	3.71 ± 0.49	4.69 ± 0.6	0.218804	4.69 ± 0.6	4.22 ± 0.56
cg07856295	VSNL1	0.0013342	7.09 ± 1.37	4.94 ± 0.79	0.268626	4.94 ± 0.79	5.95 ± 1.44
cg25771322	CEP55;CEP55	0.0013346	79.76 ± 1.38	82.78 ± 1.68	0.891021	82.78 ± 1.68	82.55 ± 2.57
cg15132440	Intergenic	0.0013355	8.21 ± 1.22	10.49 ± 1.36	0.501224	10.49 ± 1.36	10.02 ± 0.87
cg22181527	CASC15	0.0013369	91.67 ± 0.8	90.04 ± 0.78	0.77121	90.04 ± 0.78	90.18 ± 0.9
cg27361709	GPC6	0.0013381	89.74 ± 1.62	92.72 ± 0.88	0.0315258	92.72 ± 0.88	90.77 ± 1.56
cg08462879	PDE4B;PDE4B;PDE4B	0.0013382	19.77 ± 3.13	23.39 ± 3.4	0.0991236	23.39 ± 3.4	22.11 ± 3.27
cg08043571	Intergenic	0.0013392	4.72 ± 0.5	5.83 ± 0.45	0.0529599	5.83 ± 0.45	5 ± 0.49
cg03864281	NMUR2	0.0013402	58.97 ± 1.88	61.99 ± 2.17	0.553968	61.99 ± 2.17	60.91 ± 2.46
cg15773138	ZNF555	0.0013411	6.49 ± 0.94	7.79 ± 1.08	0.788818	7.79 ± 1.08	8.17 ± 2.04
cg10145540	TOM1L2;TOM1L2;TOM1L2;TOM1L2;TOM1L2;TOM1L2	0.0013429	79.74 ± 2.67	82.7 ± 2.36	0.0068165	82.7 ± 2.36	79.63 ± 2.25
cg10485926	Intergenic	0.0013454	50.7 ± 3.18	53.84 ± 3.26	0.105096	53.84 ± 3.26	52.04 ± 3.57
cg10035922	OSCP1;OSCP1;OSCP1;OSCP1	0.0013474	5.54 ± 0.67	3.89 ± 0.89	0.123211	3.89 ± 0.89	4.54 ± 0.5
cg26881997	Intergenic	0.0013482	82.25 ± 1.32	84.2 ± 0.92	0.0133527	84.2 ± 0.92	82.33 ± 1.34
cg03520021	CLIC6	0.0013504	28.56 ± 2.06	30.59 ± 1.92	0.0478508	30.59 ± 1.92	29.36 ± 1.19
cg12906471	MKX;MKX	0.0013521	80.57 ± 3.52	83.26 ± 2.93	0.271988	83.26 ± 2.93	85 ± 2.88
cg27291337	NRG3;NRG3;NRG3	0.0013548	87.36 ± 1.43	90.42 ± 1.51	0.199103	90.42 ± 1.51	88.26 ± 2.5
cg26170077	FRMD8	0.0013562	3.06 ± 0.42	3.77 ± 0.31	0.0137755	3.77 ± 0.31	3.21 ± 0.54
cg03170472	CWH43	0.0013569	7.29 ± 1.19	9.64 ± 1.71	0.0288856	9.64 ± 1.71	7.5 ± 1.06
cg12985245	SPO11;SPO11	0.0013572	33.14 ± 1.39	34.76 ± 0.9	0.0431761	34.76 ± 0.9	33.38 ± 1.32
cg22357164	RNF213;RNF213	0.0013576	12.78 ± 1.2	11.21 ± 0.95	0.378806	11.21 ± 0.95	10.88 ± 1.41
cg04685187	VPS8;VPS8	0.0013582	3.21 ± 0.4	3.83 ± 0.51	0.252735	3.83 ± 0.51	3.59 ± 0.34
cg03601764	CUL9	0.0013587	56.94 ± 2.72	58.63 ± 2.42	0.395001	58.63 ± 2.42	57.76 ± 2.81
cg04125972	C7	0.001359	90.21 ± 1.57	86.73 ± 2.07	0.759135	86.73 ± 2.07	87.09 ± 2.91
cg22419482	MPP1;MPP1;MPP1;MPP1	0.0013605	93.14 ± 0.91	91.83 ± 0.74	0.329745	91.83 ± 0.74	92.7 ± 3.07
cg00485707	ISG20	0.0013614	79.99 ± 2.65	82.19 ± 2	0.965067	82.19 ± 2	82.2 ± 1.24
cg06953768	C5orf24;C5orf24	0.0013623	11.46 ± 1.91	17.87 ± 2.17	0.614894	17.87 ± 2.17	18.25 ± 1.39
cg02324432	KLHL2;KLHL2;KLHL2	0.0013627	62.28 ± 3.13	64.54 ± 2.94	0.525008	64.54 ± 2.94	65.17 ± 4.69
cg15832574	ALG6	0.0013627	92.9 ± 1.61	94.4 ± 1.01	0.965377	94.4 ± 1.01	94.39 ± 1.3
cg16951920	F8	0.0013646	32.39 ± 2.08	36.24 ± 1.15	0.194721	36.24 ± 1.15	34.33 ± 2.29
cg08777490	DUSP4;DUSP4	0.0013648	3.46 ± 0.27	4.45 ± 0.53	0.201126	4.45 ± 0.53	4.16 ± 0.41
cg19570781	Intergenic	0.0013659	4.14 ± 0.49	5.36 ± 0.68	0.498027	5.36 ± 0.68	5.09 ± 0.41
cg19462876	FAR2;FAR2;FAR2;FAR2;FAR2;FAR2	0.0013686	96.05 ± 0.85	94.17 ± 0.78	0.116393	94.17 ± 0.78	95.26 ± 1
cg14120582	Intergenic	0.0013712	85.05 ± 1.57	88.87 ± 1.73	0.387568	88.87 ± 1.73	88.11 ± 1.38
cg12652137	BOK	0.0013731	85.48 ± 2.25	89.41 ± 1.38	0.0787749	89.41 ± 1.38	86.79 ± 2.15
cg05576992	Intergenic	0.0013736	18.88 ± 4.04	20.35 ± 4.32	0.716175	20.35 ± 4.32	19.8 ± 2.93
cg21138237	EXOG;EXOG	0.0013755	80.35 ± 3.19	82.75 ± 2.43	0.300484	82.75 ± 2.43	81.57 ± 2.66
cg00787856	CASZ1;CASZ1	0.0013762	65.58 ± 3.17	67.58 ± 3.35	0.474895	67.58 ± 3.35	67.25 ± 2.65
cg08112879	ADPRHL1;ADPRHL1	0.0013774	63.37 ± 1.31	66.52 ± 1.33	0.538375	66.52 ± 1.33	65.94 ± 1.22
cg07267832	TCHP;TCHP	0.0013781	91.09 ± 2.3	93.39 ± 1.75	0.411639	93.39 ± 1.75	92.52 ± 1.33
cg26348882	BTBD1;BTBD1	0.0013801	85.93 ± 1.18	83.21 ± 1.05	0.301384	83.21 ± 1.05	84.32 ± 1.96
cg03709247	Intergenic	0.0013813	70.19 ± 2.41	71.43 ± 1.97	0.0720589	71.43 ± 1.97	69.86 ± 0.85
cg16222427	Intergenic	0.0013814	71.97 ± 1.89	75.93 ± 1.67	0.114087	75.93 ± 1.67	73.37 ± 2.49
cg20582188	Intergenic	0.0013817	4.64 ± 0.2	3.75 ± 0.43	0.290153	3.75 ± 0.43	4.27 ± 0.7
cg22001632	CALD1;CALD1;CALD1	0.0013864	17.68 ± 1.36	20.46 ± 1.42	0.788802	20.46 ± 1.42	20.14 ± 3.7
cg00481742	TC2N;TC2N;TC2N;TC2N;TC2N	0.0013866	5.46 ± 0.56	6.24 ± 0.69	0.143411	6.24 ± 0.69	5.63 ± 0.91
cg10979191	Intergenic	0.0013935	24.62 ± 2.34	27.91 ± 3.52	0.298273	27.91 ± 3.52	26.23 ± 3.36
cg23530232	H6PD;H6PD	0.0013951	94.69 ± 1.25	96.33 ± 0.86	0.0069299	96.33 ± 0.86	93.98 ± 1.46
cg10269078	RORC;RORC	0.0013969	80.6 ± 1.81	82.36 ± 1.39	0.911221	82.36 ± 1.39	82.48 ± 1.36
cg15712182	Intergenic	0.0013991	67.69 ± 1.7	70.61 ± 1.58	0.422336	70.61 ± 1.58	69.94 ± 0.87
cg26595154	MEGF11	0.0014017	87.4 ± 1.01	85.31 ± 1.27	0.0260311	85.31 ± 1.27	86.76 ± 2.1
cg18166347	ETNK1;ETNK1	0.0014025	3.01 ± 0.33	3.69 ± 0.44	0.156377	3.69 ± 0.44	3.26 ± 0.57
cg08826460	LDLR	0.0014041	5.88 ± 0.32	6.93 ± 0.48	0.0187414	6.93 ± 0.48	6.49 ± 0.67
cg04110104	Intergenic	0.0014045	19.41 ± 4.03	15.08 ± 3.99	0.150532	15.08 ± 3.99	18.94 ± 4.48
cg13901819	LRBA	0.001405	4.52 ± 0.65	5.26 ± 0.59	0.163981	5.26 ± 0.59	4.46 ± 0.94
cg06148145	LOC101929106	0.0014078	22.3 ± 2.16	25.46 ± 1.56	0.0786744	25.46 ± 1.56	23.3 ± 1.41
cg24707898	Intergenic	0.0014084	60.6 ± 4.03	62.75 ± 3.59	0.694969	62.75 ± 3.59	63.32 ± 5.91
cg08807414	Intergenic	0.0014092	78.46 ± 2.51	81.26 ± 2.39	0.553256	81.26 ± 2.39	80.64 ± 2.56
cg24322366	Intergenic	0.0014108	48.11 ± 1.59	49.89 ± 1.28	0.112308	49.89 ± 1.28	49.21 ± 0.56
cg17065772	NR2C2	0.0014122	89.54 ± 1.06	91.26 ± 1.29	0.923663	91.26 ± 1.29	91 ± 2.18
cg16475475	Intergenic	0.0014128	96.89 ± 0.76	96.35 ± 0.85	0.773941	96.35 ± 0.85	96.45 ± 1.2
cg15371427	TPM2;TPM2;TPM2;TPM2	0.0014143	26.24 ± 2.03	24.93 ± 2.27	0.420611	24.93 ± 2.27	24.29 ± 3
cg05273533	Intergenic	0.0014164	4.86 ± 0.44	6.23 ± 0.88	0.0450628	6.23 ± 0.88	5.28 ± 0.38
cg18270627	EIF3I;C1orf91	0.0014165	2.88 ± 0.46	2.29 ± 0.43	0.0044738	2.29 ± 0.43	2.84 ± 0.66
cg08418717	Intergenic	0.001418	9.27 ± 1.24	11.91 ± 1.26	0.0970771	11.91 ± 1.26	9.93 ± 1.22
cg04508033	PLCE1-AS1;PLCE1;PLCE1;PLCE1	0.0014216	87.46 ± 1.48	92.01 ± 0.99	0.0048025	92.01 ± 0.99	89.61 ± 1.13
cg10621559	SWI5;GOLGA2	0.0014218	5.46 ± 1.01	7.75 ± 2.09	0.906058	7.75 ± 2.09	7.49 ± 1.56
cg05721093	AMOTL1	0.0014222	23.28 ± 7.04	15.89 ± 3.11	0.228876	15.89 ± 3.11	18.4 ± 3.2
cg18157394	Intergenic	0.001427	60.3 ± 0.57	62.79 ± 0.95	0.084773	62.79 ± 0.95	60.8 ± 2.13
cg16051114	DHCR24	0.0014286	88.68 ± 1.33	90.58 ± 0.74	0.217607	90.58 ± 0.74	89.06 ± 2.62
cg25768270	Intergenic	0.0014294	87.49 ± 2.28	85.3 ± 2.46	0.0118798	85.3 ± 2.46	87.47 ± 1.78
cg23208152	ZMYND10;ZMYND10	0.0014343	3.98 ± 0.42	3.73 ± 0.46	0.575789	3.73 ± 0.46	3.99 ± 0.85
cg23354307	ARHGEF10	0.0014355	69.98 ± 2.39	71.79 ± 2.1	0.0065837	71.79 ± 2.1	69.71 ± 1.7
cg26439917	TNNT2;TNNT2;TNNT2;TNNT2;TNNT2;TNNT2;TNNT2	0.0014391	51.38 ± 2.6	54.58 ± 1.69	0.199094	54.58 ± 1.69	53.55 ± 2.22
cg23843019	ZNF321	0.0014396	10 ± 1.11	12.45 ± 0.79	0.605895	12.45 ± 0.79	12 ± 1.85
cg07849177	LOC100133091	0.0014426	4.43 ± 0.67	3.64 ± 0.64	0.793991	3.64 ± 0.64	3.58 ± 0.86
cg09684392	KIAA0753	0.0014426	91.94 ± 0.97	93.68 ± 0.68	0.702841	93.68 ± 0.68	93.48 ± 0.97
cg14095142	Intergenic	0.0014433	3.9 ± 0.19	3.41 ± 0.26	0.144472	3.41 ± 0.26	3.66 ± 0.33
cg06852250	METTL13;METTL13;METTL13	0.0014455	9.11 ± 1.17	7.78 ± 0.79	0.452518	7.78 ± 0.79	8.22 ± 0.83
cg05157878	Intergenic	0.0014504	92.02 ± 1.58	94.54 ± 1.13	0.961947	94.54 ± 1.13	94.55 ± 0.89
cg12686273	CCDC64B	0.0014523	82.11 ± 2.37	86.11 ± 1.41	0.0738461	86.11 ± 1.41	83.69 ± 2.04
cg22441683	ANO6;ANO6;PLEKHA9;ANO6	0.0014526	5.69 ± 0.44	4.7 ± 0.31	0.0351735	4.7 ± 0.31	5.5 ± 0.8
cg19421526	CRTAC1	0.0014579	21.39 ± 1.84	24.59 ± 2.63	0.0513399	24.59 ± 2.63	22.56 ± 3.11
cg04332493	ZNF23;ZNF23;ZNF23;ZNF23;ZNF23	0.0014641	4.08 ± 0.49	3.34 ± 0.52	0.314062	3.34 ± 0.52	3.66 ± 0.36
cg07646860	Intergenic	0.0014648	91.09 ± 1.18	93.43 ± 1.23	0.346965	93.43 ± 1.23	92.86 ± 1
cg25296173	Intergenic	0.0014661	4.17 ± 0.35	2.99 ± 0.4	0.0067976	2.99 ± 0.4	4.03 ± 0.48
cg13979581	GCC1	0.0014673	38.67 ± 1.92	42.03 ± 2.12	0.476303	42.03 ± 2.12	41.16 ± 0.83
cg22951773	Intergenic	0.001469	10.46 ± 1.67	14 ± 1.81	0.027475	14 ± 1.81	10.27 ± 2.53
cg01379272	SORCS2	0.0014732	46.52 ± 2.49	50.96 ± 2.51	0.111897	50.96 ± 2.51	49.77 ± 3.01
cg01266850	Intergenic	0.001474	6.44 ± 0.81	5.13 ± 0.64	0.77972	5.13 ± 0.64	5.06 ± 0.76
cg19068238	MAP4K5;MAP4K5	0.0014749	91.6 ± 1.64	93.93 ± 0.93	0.206868	93.93 ± 0.93	93.01 ± 1.27
cg19445178	Intergenic	0.0014773	62.64 ± 1.32	64.39 ± 1.51	0.0657278	64.39 ± 1.51	62.29 ± 3.35
cg17220734	MSANTD4	0.001482	26.42 ± 3.43	28.34 ± 3.17	0.811919	28.34 ± 3.17	28.65 ± 2.85
cg25593309	Intergenic	0.0014828	16.45 ± 0.9	17.62 ± 1.01	0.0778445	17.62 ± 1.01	15.7 ± 1.94
cg07490542	EGFR	0.0014835	45.61 ± 2.97	46.85 ± 2.59	0.316481	46.85 ± 2.59	46.38 ± 3.13
cg23808767	Intergenic	0.0014871	94.98 ± 0.72	95.93 ± 0.63	0.460793	95.93 ± 0.63	96.31 ± 1.47
cg10715092	MIR663	0.0014914	34.8 ± 5.88	32.03 ± 6.45	0.0468728	32.03 ± 6.45	33.5 ± 7.1
cg15572575	SEPT9;SEPT9;SEPT9;SEPT9;SEPT9;SEPT9;SEPT9	0.0014927	91.87 ± 1.36	90.39 ± 1.41	0.224786	90.39 ± 1.41	91.46 ± 1.04
cg02797349	C1orf226	0.001493	93.31 ± 1.28	94.89 ± 1.11	0.517661	94.89 ± 1.11	94.33 ± 1.07
cg22558101	Intergenic	0.0014948	94.87 ± 0.69	92.67 ± 1.32	0.0761464	92.67 ± 1.32	93.95 ± 1.53
cg05413370	Intergenic	0.0014953	81.91 ± 2.1	84.79 ± 2.11	0.172346	84.79 ± 2.11	83.18 ± 1.31
cg26935168	RPL22	0.0014953	71.99 ± 3.54	74.7 ± 2.72	0.294256	74.7 ± 2.72	73.84 ± 2.53
cg15817390	Intergenic	0.0014994	60.81 ± 0.97	63.7 ± 1.57	0.0073974	63.7 ± 1.57	61.95 ± 1.84
cg01342115	Intergenic	0.0014998	91.07 ± 1.55	88.91 ± 1.08	0.681835	88.91 ± 1.08	89.28 ± 3.19
cg07780216	GTF2E2	0.0015007	5.06 ± 0.57	3.64 ± 0.47	0.604758	3.64 ± 0.47	3.76 ± 0.58
cg11604811	Intergenic	0.0015013	39.39 ± 3.99	42.36 ± 3.12	0.624229	42.36 ± 3.12	42.01 ± 3.04
cg19154068	MANEAL;MANEAL;MANEAL	0.0015023	4.97 ± 0.35	5.96 ± 0.36	0.883794	5.96 ± 0.36	5.96 ± 1.15
cg10889344	ADAMTS3	0.0015026	67.58 ± 2.29	71.47 ± 1.07	0.0469382	71.47 ± 1.07	69.84 ± 1.3
cg18992706	CCDC122;C13orf31;C13orf31	0.0015057	18.54 ± 2.13	20.44 ± 1.71	0.297732	20.44 ± 1.71	19.43 ± 2.27
cg08792807	TMOD3	0.0015101	5.94 ± 0.6	4.68 ± 0.67	0.901851	4.68 ± 0.67	4.66 ± 0.7
cg14396356	MAML3	0.0015102	92.59 ± 1.29	93.91 ± 1.5	0.369315	93.91 ± 1.5	93.33 ± 0.52
cg09561663	TGM3	0.0015103	49.74 ± 5.77	52.47 ± 5.33	0.44678	52.47 ± 5.33	51.71 ± 5.54
cg18896174	LRRK1	0.0015123	7.33 ± 0.6	8.04 ± 0.73	0.406509	8.04 ± 0.73	7.56 ± 1.02
cg17244009	Intergenic	0.0015133	92.34 ± 1.69	93.88 ± 0.94	0.891829	93.88 ± 0.94	93.87 ± 1.28
cg20808464	Intergenic	0.0015147	82.75 ± 3.27	86.38 ± 2.68	0.75989	86.38 ± 2.68	86.75 ± 3.87
cg13644182	Intergenic	0.0015169	44.5 ± 3.56	42.16 ± 3.66	0.879531	42.16 ± 3.66	42.49 ± 5.83
cg21920827	MFAP2;MFAP2;MFAP2;MFAP2;MFAP2;MFAP2;MFAP2;MFAP2	0.0015176	78.59 ± 2.24	81.22 ± 1.52	0.295656	81.22 ± 1.52	80.44 ± 1.51
cg03490460	RASA3	0.001522	61.66 ± 3.25	58.04 ± 3.06	0.610186	58.04 ± 3.06	59 ± 4.42
cg12303102	ANXA7;ANXA7	0.001522	5.42 ± 0.41	7.77 ± 1.54	0.0260495	7.77 ± 1.54	6.32 ± 1.36
cg13593132	GRIN2B	0.0015227	34.96 ± 1.02	35.94 ± 1	0.540829	35.94 ± 1	35.35 ± 2.07
cg19119942	Intergenic	0.0015255	41.34 ± 1.99	43.9 ± 2.76	0.782329	43.9 ± 2.76	44.46 ± 4.46
cg08847038	THNSL1;ENKUR	0.0015273	3.66 ± 0.71	5.17 ± 0.8	0.565124	5.17 ± 0.8	4.85 ± 1.24
cg09491281	TMEM68;TGS1;TGS1	0.0015294	6.58 ± 0.86	5.2 ± 1.08	0.101084	5.2 ± 1.08	6.53 ± 1.17
cg20303399	ADRA1A;ADRA1A;ADRA1A;ADRA1A	0.0015299	33.53 ± 4.14	35.5 ± 4.8	0.0011644	35.5 ± 4.8	33.8 ± 4.85
cg10107956	C1orf91	0.0015341	72.12 ± 1.68	73.5 ± 1.73	0.537786	73.5 ± 1.73	74.08 ± 2.04
cg01582932	Intergenic	0.0015379	87.89 ± 0.68	88.78 ± 0.7	0.272689	88.78 ± 0.7	87.83 ± 1.93
cg06133360	KCNA10	0.0015387	89.28 ± 1.12	86.88 ± 1.82	0.616785	86.88 ± 1.82	87.42 ± 0.64
cg23137494	SLC16A2	0.0015396	6.03 ± 0.69	7.85 ± 0.9	0.223421	7.85 ± 0.9	7.05 ± 1.39
cg03753331	DPP10;DPP10	0.0015398	9.09 ± 1.28	8.08 ± 1.27	0.543835	8.08 ± 1.27	8.61 ± 1.29
cg23429240	CORO1C	0.0015398	76.94 ± 0.88	72.39 ± 2.24	0.572825	72.39 ± 2.24	71.49 ± 3.14
cg09859437	ABI1;ABI1;ABI1;ABI1;ABI1;ABI1;ABI1;ABI1;ABI1;ABI1;ABI1;ABI1	0.0015403	93.41 ± 0.83	91.5 ± 1.09	0.0339713	91.5 ± 1.09	93.46 ± 1.18
cg09490071	RASA1;RASA1	0.0015404	4.69 ± 0.45	4 ± 0.39	0.48086	4 ± 0.39	3.89 ± 0.87
cg04594013	SUV39H1	0.0015457	64 ± 1.16	67.79 ± 1.2	0.0815995	67.79 ± 1.2	64.8 ± 2.9
cg16833452	Intergenic	0.0015463	8.87 ± 1.34	10.83 ± 1.64	0.387478	10.83 ± 1.64	10.12 ± 0.74
cg02052145	QTRT1	0.0015464	3.08 ± 0.37	2.44 ± 0.34	0.118118	2.44 ± 0.34	3.05 ± 0.65
cg15147133	SULF2;SULF2;SULF2	0.0015491	62.79 ± 0.81	64.72 ± 1.19	0.9428	64.72 ± 1.19	64.7 ± 0.94
cg07691330	FH	0.0015494	12.26 ± 1.57	17.32 ± 2.01	0.873083	17.32 ± 2.01	17.29 ± 4.51
cg17926328	LSAMP	0.0015496	5.6 ± 0.35	6.87 ± 0.44	0.0064407	6.87 ± 0.44	5.61 ± 0.67
cg03905236	SH3GL3;SH3GL3;SH3GL3;SH3GL3	0.0015533	94.2 ± 0.41	90.56 ± 1.39	0.0143405	90.56 ± 1.39	93.18 ± 1.63
cg26075933	MEIS2;MEIS2;MEIS2;MEIS2;MEIS2;MEIS2;MEIS2;MEIS2;MEIS2	0.0015537	67.2 ± 1.17	70.03 ± 1.48	0.0249395	70.03 ± 1.48	67.45 ± 1.76
cg07952270	LBX1-AS1	0.0015547	48.1 ± 1.14	50.21 ± 0.49	0.106123	50.21 ± 0.49	49.33 ± 1.35
cg03030858	Intergenic	0.0015549	6.58 ± 0.84	8.57 ± 1.61	0.186554	8.57 ± 1.61	7.37 ± 1.48
cg16506172	L2HGDH;ATP5S;ATP5S;ATP5S	0.0015564	5.27 ± 0.69	3.88 ± 0.86	0.0732338	3.88 ± 0.86	5.5 ± 1.07
cg16313640	FAM65B;FAM65B	0.0015582	88.28 ± 2.28	90.49 ± 1.37	0.381202	90.49 ± 1.37	89.67 ± 1.94
cg18679444	RAI1	0.001561	42.15 ± 1.65	44.12 ± 1.67	0.142568	44.12 ± 1.67	42.37 ± 1.57
cg00778930	DCHS2;DCHS2	0.0015611	60.05 ± 0.62	61.69 ± 0.54	0.255668	61.69 ± 0.54	62.33 ± 1.24
cg27485687	Intergenic	0.0015622	63.23 ± 2.28	61.63 ± 2	0.391835	61.63 ± 2	62.96 ± 2.08
cg01767862	SNORD114-28	0.0015632	91.32 ± 0.92	93.36 ± 0.79	0.148738	93.36 ± 0.79	92.37 ± 1.04
cg10503867	NIPSNAP3B;NIPSNAP3B;NIPSNAP3B;NIPSNAP3B	0.0015703	3.91 ± 0.44	3.2 ± 0.52	0.693444	3.2 ± 0.52	3.44 ± 1.05
cg01331530	OSGIN2;OSGIN2	0.0015738	10.85 ± 1.41	12.34 ± 1.62	0.796928	12.34 ± 1.62	12.13 ± 1.12
cg06051619	DIP2C	0.0015743	49.46 ± 2.34	51.32 ± 2.24	0.61838	51.32 ± 2.24	50.36 ± 4.62
cg22469274	HOXA6	0.0015748	3.66 ± 0.57	4.43 ± 0.49	0.0313686	4.43 ± 0.49	3.26 ± 0.77
cg15403654	KDM6B	0.0015768	4.75 ± 0.81	3.74 ± 0.65	0.0530534	3.74 ± 0.65	4.4 ± 0.29
cg13643040	PRRX2	0.001579	34.89 ± 1.69	36.7 ± 1.5	0.735719	36.7 ± 1.5	36.94 ± 2.83
cg00104187	Intergenic	0.0015796	87.34 ± 1.34	84.9 ± 1.01	0.259717	84.9 ± 1.01	85.74 ± 2.27
cg15790171	Intergenic	0.0015816	90.46 ± 2.02	93.3 ± 0.7	0.24604	93.3 ± 0.7	92.72 ± 0.6
cg22562376	SLC9A2	0.0015816	3.1 ± 0.5	4.41 ± 0.65	0.0256537	4.41 ± 0.65	3.27 ± 1.12
cg13803101	Intergenic	0.0015824	90.15 ± 2.18	91.47 ± 1.63	0.541385	91.47 ± 1.63	92.24 ± 1.36
cg20206375	HNRNPL	0.0015838	8.85 ± 1.74	10.23 ± 2.32	0.581717	10.23 ± 2.32	10.72 ± 3.2
cg16345213	Intergenic	0.0015856	66.09 ± 1.93	69.36 ± 2.87	0.255418	69.36 ± 2.87	67.72 ± 3
cg08214329	IFT140;TMEM204	0.0015859	92.98 ± 0.62	91.69 ± 0.69	0.0186118	91.69 ± 0.69	92.88 ± 0.95
cg20303844	RASA1;RASA1	0.001586	10.18 ± 1.2	10.89 ± 1.17	0.835183	10.89 ± 1.17	10.73 ± 1.46
cg24192508	Intergenic	0.0015872	87 ± 1.81	86.09 ± 1.84	0.463216	86.09 ± 1.84	85.61 ± 1.65
cg21292566	TMPO;TMPO;TMPO;TMPO	0.0015875	94.83 ± 0.81	93.67 ± 1.11	0.04468	93.67 ± 1.11	95.1 ± 1.83
cg00774600	TGFBR1;TGFBR1;TGFBR1	0.0015881	94.17 ± 1.18	94.73 ± 1.03	0.0951382	94.73 ± 1.03	93.24 ± 1.31
cg03122453	NSUN6	0.0015892	3.7 ± 0.61	4.68 ± 0.68	0.143733	4.68 ± 0.68	4.16 ± 0.67
cg07184922	COPS7B	0.0015914	86.9 ± 1.09	89.91 ± 1	0.355094	89.91 ± 1	89.24 ± 1.1
cg23084528	HSD17B7P2	0.0015916	38.08 ± 3.21	40.09 ± 2.98	0.582323	40.09 ± 2.98	39.39 ± 3.64
cg10147462	Intergenic	0.0015918	7.89 ± 0.6	6.31 ± 0.23	0.558705	6.31 ± 0.23	6.85 ± 1.56
cg05602008	LRBA;LRBA	0.0015927	93.75 ± 2.13	95.98 ± 1.38	0.924775	95.98 ± 1.38	95.9 ± 1.16
cg01430283	PLEKHB1;PLEKHB1;PLEKHB1;PLEKHB1;PLEKHB1	0.0015934	86.42 ± 2.07	88.59 ± 1.39	0.984506	88.59 ± 1.39	88.58 ± 1.55
cg07321467	BMP3	0.0015947	26.38 ± 2.51	31.67 ± 1.7	0.932995	31.67 ± 1.7	31.86 ± 3.34
cg26483805	Intergenic	0.0015978	10.89 ± 0.97	13.82 ± 2.19	0.0101504	13.82 ± 2.19	11.88 ± 2.27
cg00140501	CHMP7	0.001598	3.36 ± 0.53	4.36 ± 0.76	0.382704	4.36 ± 0.76	3.93 ± 0.3
cg19942813	BCL6	0.0016011	8.27 ± 0.91	9.43 ± 0.82	0.584252	9.43 ± 0.82	9.14 ± 1.24
cg09274402	PTPN12;PTPN12;PTPN12	0.0016023	6.49 ± 0.79	8.19 ± 1.04	0.122581	8.19 ± 1.04	7.49 ± 1.34
cg19659210	ASB7;LINS1;LINS1;ASB7;LINS1;LINS1	0.0016031	9.45 ± 0.39	8.3 ± 0.35	0.214798	8.3 ± 0.35	8.91 ± 0.9
cg09442654	FAM150A;FAM150A	0.0016032	5.05 ± 0.65	6.21 ± 0.98	0.284267	6.21 ± 0.98	5.76 ± 0.5
cg14890509	Intergenic	0.0016051	91.69 ± 1.22	89.56 ± 1.02	0.284583	89.56 ± 1.02	90.39 ± 1.13
cg09796638	ANKRD10;ANKRD10;ANKRD10;ANKRD10	0.0016055	93.6 ± 1.37	92.38 ± 1.38	0.717302	92.38 ± 1.38	92.14 ± 0.73
cg20723773	MAD1L1;MAD1L1;MAD1L1	0.0016061	89.67 ± 0.81	91.6 ± 1.41	0.27045	91.6 ± 1.41	90.83 ± 0.42
cg20959229	NCAM1-AS1;NCAM1;NCAM1;NCAM1	0.0016107	87.37 ± 1.68	90.81 ± 1.03	0.068579	90.81 ± 1.03	89.45 ± 1.26
cg18909525	ASB6;ASB6	0.001611	9.1 ± 1.23	11.8 ± 0.95	0.0338215	11.8 ± 0.95	8.85 ± 1.76
cg16999370	QRFPR	0.0016125	6.49 ± 0.52	5.23 ± 0.58	0.299035	5.23 ± 0.58	5.9 ± 1.38
cg10217975	DUSP7	0.0016163	5.9 ± 0.5	4.52 ± 0.44	0.0566112	4.52 ± 0.44	5.03 ± 0.56
cg02103918	FBLN7;FBLN7	0.0016164	85.23 ± 2.78	87.54 ± 2.07	0.882963	87.54 ± 2.07	87.73 ± 1.01
cg26630069	SHPK	0.0016182	84.28 ± 2.82	86.12 ± 2.14	0.899716	86.12 ± 2.14	86.27 ± 1.13
cg23517300	Intergenic	0.0016201	58.07 ± 2.09	61.53 ± 2.2	0.340255	61.53 ± 2.2	60.43 ± 2.15
cg13203507	COL9A3	0.0016214	30.64 ± 1.51	32.27 ± 1.79	0.0588973	32.27 ± 1.79	30.81 ± 2.58
cg16366709	SGSM3	0.0016233	77.1 ± 1.47	79.48 ± 0.73	0.544036	79.48 ± 0.73	78.87 ± 1.96
cg09604180	POU2F1;POU2F1;POU2F1	0.0016239	65.5 ± 6.7	67.68 ± 6.81	0.211365	67.68 ± 6.81	66.42 ± 7.94
cg10513253	SOCS1	0.0016246	4.39 ± 0.71	3.65 ± 0.44	0.850408	3.65 ± 0.44	3.64 ± 0.65
cg10752731	RPTOR;RPTOR	0.0016261	93.71 ± 0.95	95.2 ± 0.79	0.711086	95.2 ± 0.79	94.66 ± 1.68
cg24913975	Intergenic	0.0016263	50.77 ± 1.7	53.19 ± 2.3	0.333414	53.19 ± 2.3	52.38 ± 2.45
cg26918062	NAT15;NAT15;ZNF597	0.0016263	44.54 ± 1.49	46.51 ± 1.47	0.60729	46.51 ± 1.47	46.08 ± 1.7
cg11117381	KIAA0368	0.0016309	95.37 ± 0.51	93.55 ± 0.81	0.0972705	93.55 ± 0.81	94.5 ± 1.44
cg01558754	KCNQ5;KCNQ5;KCNQ5;KCNQ5;KCNQ5	0.0016323	2.69 ± 0.6	2.13 ± 0.62	0.0554581	2.13 ± 0.62	2.88 ± 0.46
cg19577149	Intergenic	0.0016363	69.06 ± 2.1	70.95 ± 2.57	0.0503005	70.95 ± 2.57	68.54 ± 3.49
cg25390683	Intergenic	0.0016368	89.18 ± 1.78	92.02 ± 1.07	0.0285337	92.02 ± 1.07	90.25 ± 1.51
cg24003560	C1orf115	0.001644	7.07 ± 1.36	8.84 ± 1.47	0.208384	8.84 ± 1.47	7.62 ± 0.73
cg13841043	P4HA3;P4HA3;P4HA3;P4HA3;P4HA3;P4HA3	0.0016454	76.07 ± 0.97	77.97 ± 0.47	0.0035519	77.97 ± 0.47	75.68 ± 1.39
cg02004997	C3orf67-AS1;C3orf67	0.0016461	70.65 ± 2.11	72.87 ± 1.95	0.0272693	72.87 ± 1.95	70.68 ± 1.91
cg14639904	Intergenic	0.0016465	92.29 ± 0.96	90.64 ± 0.56	0.929342	90.64 ± 0.56	90.47 ± 1.77
cg27081821	KANK3	0.0016481	55.8 ± 2.88	59.39 ± 2.33	0.012582	59.39 ± 2.33	56.38 ± 2.79
cg12305060	Intergenic	0.0016485	63.51 ± 3.38	59.84 ± 4.23	0.979672	59.84 ± 4.23	59.89 ± 5.64
cg23718467	Intergenic	0.0016491	10.3 ± 0.89	12.46 ± 0.43	0.0387417	12.46 ± 0.43	10.93 ± 1.62
cg01774977	Intergenic	0.0016508	93.3 ± 0.92	95.01 ± 0.74	0.147362	95.01 ± 0.74	94.2 ± 0.51
cg18202867	Intergenic	0.0016516	45.23 ± 1.55	48 ± 1.02	0.215622	48 ± 1.02	47.73 ± 1.16
cg18256707	SETD8	0.001652	4.99 ± 0.7	5.69 ± 0.88	0.666845	5.69 ± 0.88	5.46 ± 1.39
cg20261989	Intergenic	0.001652	44.3 ± 4.26	48.2 ± 3.44	0.0223395	48.2 ± 3.44	45.06 ± 3.92
cg01559383	GARS	0.0016521	90.57 ± 1.57	93.44 ± 0.62	0.65616	93.44 ± 0.62	93.66 ± 1.8
cg09996240	HMG20B	0.0016533	95.37 ± 1.3	94.02 ± 1.22	0.107827	94.02 ± 1.22	95.03 ± 0.73
cg00638396	OBSCN;OBSCN;OBSCN	0.0016534	75.82 ± 8.6	82.72 ± 4.66	0.219784	82.72 ± 4.66	79.76 ± 3.34
cg15469578	Intergenic	0.0016571	73.03 ± 1.92	77.27 ± 2.32	0.0472828	77.27 ± 2.32	75.3 ± 1.44
cg02203224	ARL6IP4;ARL6IP4;OGFOD2;ARL6IP4;ARL6IP4	0.0016578	79.11 ± 3.63	81.25 ± 2.95	0.576369	81.25 ± 2.95	80.69 ± 2.24
cg07277965	VAV2;VAV2	0.0016586	5.77 ± 0.55	5.02 ± 0.28	0.143189	5.02 ± 0.28	5.58 ± 0.89
cg19354091	SERPINB8;SERPINB8;SERPINB8	0.0016602	5.76 ± 0.83	4.15 ± 0.62	0.0307069	4.15 ± 0.62	5.81 ± 1.33
cg21370267	DUSP13;DUSP13;DUSP13;DUSP13	0.0016603	67.04 ± 1.95	69.33 ± 1.33	0.122617	69.33 ± 1.33	68.26 ± 0.96
cg19512848	C14orf48;C14orf48;C14orf48	0.0016619	69.76 ± 2.16	72.28 ± 2.12	0.512309	72.28 ± 2.12	71.62 ± 3.32
cg21886275	SMURF1;SMURF1;SMURF1	0.0016626	81.02 ± 1.97	83.11 ± 1.29	0.243755	83.11 ± 1.29	82.56 ± 1.29
cg23375068	MIOX	0.0016651	16.57 ± 2.02	17.52 ± 2.05	0.367254	17.52 ± 2.05	16.86 ± 3.4
cg03761746	HIST1H1D	0.0016662	6.68 ± 1.41	7.79 ± 1.46	0.891564	7.79 ± 1.46	8.15 ± 2.77
cg22932313	ELF5	0.0016675	88.09 ± 2	86.47 ± 2.23	0.736396	86.47 ± 2.23	86.58 ± 3.2
cg15550572	PRKCZ;PRKCZ;PRKCZ	0.0016678	3.08 ± 0.59	4.01 ± 0.87	0.496123	4.01 ± 0.87	3.78 ± 0.77
cg03871824	ZNF517	0.0016723	10.56 ± 0.96	8.84 ± 1.09	0.703483	8.84 ± 1.09	9.14 ± 0.91
cg26060535	Intergenic	0.0016732	86.74 ± 2.07	82.4 ± 2.07	0.0258955	82.4 ± 2.07	85.16 ± 3.11
cg05640207	CADPS2;CADPS2;CADPS2;RNF133	0.0016733	34.23 ± 3.5	40.49 ± 2.93	0.0164635	40.49 ± 2.93	35.56 ± 4.19
cg00940854	LOC101929710	0.001674	36.25 ± 1.39	38.86 ± 1.49	0.516278	38.86 ± 1.49	38.17 ± 2.72
cg18722847	ZNF502;ZNF502;ZNF502;ZNF502	0.0016742	4.33 ± 1.02	3.41 ± 0.76	0.346727	3.41 ± 0.76	3.9 ± 0.82
cg26854507	MSL2;MSL2	0.0016746	8.26 ± 1.24	12.13 ± 1.51	0.0178375	12.13 ± 1.51	9.99 ± 1.08
cg08758996	LOC651250	0.0016766	8.57 ± 0.93	7.77 ± 0.95	0.346417	7.77 ± 0.95	8.25 ± 1.09
cg14044124	CEP89	0.0016774	87.67 ± 1.01	85.37 ± 1.42	0.0708933	85.37 ± 1.42	87.98 ± 2.03
cg04664516	PTEN;PTEN;PTEN	0.0016776	92.96 ± 0.62	94.61 ± 0.47	0.256553	94.61 ± 0.47	94 ± 1.22
cg12289749	Intergenic	0.0016787	40.98 ± 4.17	36.64 ± 3.64	0.87194	36.64 ± 3.64	36.82 ± 4.23
cg27260218	TTLL6	0.00168	9.53 ± 1.18	11.82 ± 1.88	0.083719	11.82 ± 1.88	10.51 ± 1.29
cg20662016	DTWD2	0.0016813	93.03 ± 0.54	91.79 ± 0.46	0.156825	91.79 ± 0.46	92.69 ± 1.5
cg01230035	BCAR1;BCAR1;BCAR1;BCAR1;BCAR1;BCAR1;BCAR1	0.0016823	5.04 ± 0.57	6.11 ± 1.05	0.800594	6.11 ± 1.05	5.91 ± 0.44
cg27205487	C21orf34;MIR125B2;C21orf34	0.001683	92.86 ± 1.59	94.45 ± 0.98	0.0068105	94.45 ± 0.98	93.27 ± 0.92
cg08503681	GPR151	0.001684	91.31 ± 1.96	92.89 ± 1.92	0.73223	92.89 ± 1.92	92.78 ± 1.11
cg21419909	TRPM3;TRPM3;TRPM3;TRPM3;TRPM3;TRPM3;TRPM3;TRPM3;TRPM3;TRPM3;TRPM3;TRPM3;TRPM3;TRPM3;TRPM3;TRPM3;TRPM3;TRPM3	0.0016852	89.91 ± 1.7	92.25 ± 1.79	0.0665425	92.25 ± 1.79	90.91 ± 0.57
cg11944657	LRRC72	0.0016853	38.62 ± 3.39	41.18 ± 3.03	0.0504359	41.18 ± 3.03	39.39 ± 3.37
cg16672685	ARPC2;ARPC2;ARPC2	0.0016855	4.47 ± 0.69	3.29 ± 0.38	0.344078	3.29 ± 0.38	3.68 ± 0.77
cg08973955	PRKCA	0.0016858	72.75 ± 2.28	68.92 ± 1.45	0.0467277	68.92 ± 1.45	70.18 ± 0.94
cg04095070	VAT1L	0.001687	67.58 ± 2.11	72.83 ± 0.77	0.0708809	72.83 ± 0.77	70.92 ± 2.43
cg02776672	LZIC;NMNAT1;NMNAT1;NMNAT1	0.0016902	4.62 ± 0.64	3.34 ± 0.58	0.0277639	3.34 ± 0.58	4.32 ± 0.63
cg17277199	C2orf84	0.0016915	9.15 ± 1.37	10.39 ± 1.26	0.12201	10.39 ± 1.26	9.49 ± 1.44
cg24428016	CCR3;CCR3;CCR3;CCR3	0.0016919	39.48 ± 2.04	43.09 ± 2.28	0.138482	43.09 ± 2.28	41.41 ± 3.15
cg02933119	ZNF501	0.0016937	4.6 ± 0.32	3.68 ± 0.09	0.738303	3.68 ± 0.09	3.62 ± 0.81
cg07596645	TNNT2;TNNT2;TNNT2;TNNT2	0.0016947	54.15 ± 2.16	55.99 ± 1.74	0.389344	55.99 ± 1.74	55.05 ± 1.04
cg02826237	Intergenic	0.0016979	7.77 ± 1.26	9.3 ± 1.58	0.244407	9.3 ± 1.58	8.5 ± 0.78
cg14034197	GREB1L	0.0016986	6.64 ± 0.8	5.03 ± 0.43	0.167736	5.03 ± 0.43	5.61 ± 0.62
cg05763983	RBM26;RBM26;RBM26	0.0016996	94.14 ± 0.67	91.36 ± 2.1	0.283188	91.36 ± 2.1	92.93 ± 2.69
cg03800939	SLC37A2;SLC37A2	0.0017016	28.38 ± 1.74	29.9 ± 1.6	0.282069	29.9 ± 1.6	28.67 ± 1.87
cg08113895	Intergenic	0.0017018	15.2 ± 1.46	17.06 ± 1.61	0.285094	17.06 ± 1.61	15.62 ± 1.52
cg02639380	ODF2L;ODF2L	0.0017019	93.91 ± 1.99	95.62 ± 1.76	0.274283	95.62 ± 1.76	94.35 ± 1.73
cg09300171	FAM90A7	0.0017026	7.58 ± 0.71	9.04 ± 0.75	0.1827	9.04 ± 0.75	8.43 ± 0.97
cg10349362	GHR;GHR;GHR;GHR;GHR;GHR;GHR;GHR	0.0017039	33.32 ± 3.28	37.48 ± 4.43	0.169206	37.48 ± 4.43	41.56 ± 3.24
cg07890210	Intergenic	0.0017106	6.07 ± 0.78	8.21 ± 0.76	0.491094	8.21 ± 0.76	7.65 ± 1.8
cg06157116	Intergenic	0.0017156	91.39 ± 1.1	90.01 ± 1.06	0.0085441	90.01 ± 1.06	91.44 ± 0.62
cg11431368	Intergenic	0.001718	70.03 ± 2.19	66.59 ± 2.34	0.106892	66.59 ± 2.34	68.63 ± 1.31
cg21237133	Intergenic	0.0017208	85 ± 1.94	82.11 ± 2.12	0.648782	82.11 ± 2.12	81.57 ± 1.5
cg06722216	NOL4	0.0017216	2.91 ± 0.49	2.47 ± 0.42	0.214398	2.47 ± 0.42	3.09 ± 0.77
cg04070216	RASAL2;RASAL2	0.0017236	92.72 ± 1.93	94.59 ± 1.28	0.349164	94.59 ± 1.28	95.47 ± 0.6
cg09965568	TSPEAR;TSPEAR	0.0017276	91.98 ± 1.13	94.04 ± 0.93	0.0721152	94.04 ± 0.93	92.62 ± 1.57
cg24610866	WNT9A	0.0017279	6.62 ± 1.7	7.62 ± 1.74	0.319001	7.62 ± 1.74	6.56 ± 1.44
cg03533523	RNF149	0.0017304	92.33 ± 1.08	90.12 ± 1.3	0.149503	90.12 ± 1.3	91.78 ± 1.36
cg00145507	TUBB6;TUBB6;TUBB6;TUBB6;TUBB6;TUBB6;TUBB6;TUBB6	0.0017373	91.72 ± 1.33	94.12 ± 1.12	0.856629	94.12 ± 1.12	94.02 ± 0.79
cg07264937	CPEB3;CPEB3	0.0017391	88.18 ± 1.27	90.27 ± 1.57	0.290138	90.27 ± 1.57	89.29 ± 1.29
cg22857271	GPR160	0.0017395	92.56 ± 0.92	94.11 ± 0.9	0.789889	94.11 ± 0.9	93.65 ± 2.02
cg13227839	Intergenic	0.0017399	5.14 ± 0.6	4.37 ± 0.32	0.0025207	4.37 ± 0.32	5.37 ± 0.38
cg08551621	SMIM9	0.0017407	85.94 ± 1.72	81.18 ± 2.73	0.134891	81.18 ± 2.73	84.13 ± 4.52
cg03952262	Intergenic	0.0017436	70.17 ± 1.33	72.12 ± 1.27	0.751085	72.12 ± 1.27	72.39 ± 1.64
cg14450972	DLGAP1-AS4;DLGAP1;DLGAP1	0.0017438	58.27 ± 2.65	61.49 ± 3.18	0.646309	61.49 ± 3.18	62.1 ± 4.37
cg12962429	Intergenic	0.0017472	41.78 ± 1.4	43.98 ± 1.16	0.326946	43.98 ± 1.16	43.33 ± 1.28
cg12427317	RAI14;RAI14;RAI14;RAI14;RAI14;RAI14	0.0017495	78.43 ± 1.13	80.65 ± 1.49	0.160865	80.65 ± 1.49	79.57 ± 1.75
cg02862472	RALGPS1;RALGPS1;RALGPS1;RALGPS1	0.0017497	96 ± 0.67	94.73 ± 0.81	0.232454	94.73 ± 0.81	95.44 ± 0.93
cg17111669	NCOA5	0.0017504	6.3 ± 0.74	8.27 ± 0.9	0.0665271	8.27 ± 0.9	7.38 ± 1.6
cg10189799	PDE8B;PDE8B;PDE8B;PDE8B;PDE8B	0.0017516	90.83 ± 0.55	87.03 ± 1.55	0.146152	87.03 ± 1.55	88.54 ± 1.44
cg25765569	C12orf49;RNFT2;RNFT2	0.0017521	17.82 ± 1.03	19.88 ± 1.86	0.206082	19.88 ± 1.86	18.88 ± 1.91
cg13959426	Intergenic	0.0017538	72.3 ± 1.98	75.29 ± 1.53	0.0034881	75.29 ± 1.53	73.77 ± 1.94
cg05226558	LRRC2	0.0017572	63.74 ± 2.01	66.38 ± 2.2	0.07343	66.38 ± 2.2	63.21 ± 4.22
cg00340231	Intergenic	0.0017581	63.03 ± 2.33	64.76 ± 2.42	0.361386	64.76 ± 2.42	64.27 ± 1.87
cg02919691	Intergenic	0.001762	53.47 ± 2.19	55.9 ± 2.34	0.634287	55.9 ± 2.34	55.38 ± 2.43
cg23811837	C6orf52;PAK1IP1;C6orf52;C6orf52	0.0017626	6.65 ± 1.19	5.37 ± 0.6	0.38457	5.37 ± 0.6	5.09 ± 0.33
cg14011070	GNG4;GNG4;GNG4	0.0017685	15.51 ± 2.92	19 ± 3.71	0.846058	19 ± 3.71	19.09 ± 2.46
cg19097494	Intergenic	0.0017731	50.45 ± 1.82	53.26 ± 2.27	0.124576	53.26 ± 2.27	54.11 ± 2.35
cg07564716	HDAC4	0.0017735	88.11 ± 1.43	89.7 ± 0.89	0.583911	89.7 ± 0.89	90.14 ± 2.18
cg23698649	HECW1	0.0017755	3.95 ± 0.39	4.76 ± 0.52	0.462956	4.76 ± 0.52	5.2 ± 0.84
cg17105897	FRMPD3	0.0017756	58.23 ± 1.85	61.5 ± 1.64	0.185616	61.5 ± 1.64	59.44 ± 2.1
cg02238043	ATP8A2	0.0017759	61.06 ± 1.03	62.95 ± 1.14	0.0187447	62.95 ± 1.14	60.96 ± 2.28
cg06124883	TMEM51;TMEM51;TMEM51;TMEM51	0.0017777	81.47 ± 4.37	85.93 ± 3.24	0.462658	85.93 ± 3.24	84.47 ± 2.27
cg26038636	CAMK1D;CAMK1D	0.0017789	91.71 ± 1.11	88.38 ± 1.63	0.0735307	88.38 ± 1.63	90.74 ± 1.85
cg27045724	CALU;CALU	0.0017799	5.02 ± 0.76	3.91 ± 0.64	0.976737	3.91 ± 0.64	4.32 ± 2.07
cg08702225	Intergenic	0.0017811	4.19 ± 0.34	5.3 ± 0.55	0.958609	5.3 ± 0.55	5.46 ± 1.44
cg23842386	ENAH;ENAH;ENAH;ENAH	0.0017811	7.28 ± 1.01	6.16 ± 0.65	0.645781	6.16 ± 0.65	6.38 ± 1
cg06637768	LOC101927730	0.0017812	66.27 ± 1.42	63.03 ± 2.39	0.456092	63.03 ± 2.39	62.35 ± 2.86
cg06053447	GAS7;GAS7;GAS7	0.0017857	4.29 ± 0.18	5.09 ± 0.41	0.775698	5.09 ± 0.41	5.04 ± 0.86
cg09807979	PMVK	0.0017871	4.28 ± 0.39	5.29 ± 0.66	0.594572	5.29 ± 0.66	5.17 ± 0.61
cg20467412	Intergenic	0.0017909	71.11 ± 1.25	73.41 ± 0.48	0.226659	73.41 ± 0.48	72.55 ± 1.42
cg07656347	MDC1	0.0017919	23.58 ± 3.96	28.95 ± 4.32	0.451949	28.95 ± 4.32	29.83 ± 3.87
cg11193419	Intergenic	0.0017938	48.68 ± 1.73	51.26 ± 0.98	0.0851669	51.26 ± 0.98	50.09 ± 2.18
cg13170497	OR51B5;OR51B5	0.0017942	43.04 ± 1.96	46.31 ± 0.69	0.0232762	46.31 ± 0.69	44.75 ± 1.5
cg23901904	CASZ1;CASZ1	0.0017944	6.95 ± 1.27	5.97 ± 1.27	0.755955	5.97 ± 1.27	6.08 ± 0.7
cg27408085	ADGRB2;ADGRB2	0.0017952	85.02 ± 1.67	88.41 ± 1.25	0.268337	88.41 ± 1.25	89.05 ± 2.25
cg03209343	Intergenic	0.0017967	79.1 ± 2.12	75.66 ± 1.11	0.790033	75.66 ± 1.11	75.86 ± 1.7
cg16091746	VBP1	0.0017969	4.18 ± 0.74	3.21 ± 0.52	0.23568	3.21 ± 0.52	3.6 ± 0.32
cg20478948	Intergenic	0.0017979	59.63 ± 2.12	58.1 ± 1.8	0.612736	58.1 ± 1.8	58.54 ± 3.09
cg24149528	Intergenic	0.0017994	44.72 ± 1.1	43.87 ± 1.15	0.425084	43.87 ± 1.15	44.71 ± 2.25
cg12349227	FOXS1	0.0017999	83.4 ± 1.34	87.97 ± 1.25	0.0395318	87.97 ± 1.25	86.26 ± 0.75
cg25221496	MEIS2;MEIS2;MEIS2;MEIS2;MEIS2;MEIS2;MEIS2	0.0018002	8 ± 1.4	9.85 ± 1.58	0.0512458	9.85 ± 1.58	12.01 ± 3.43
cg25105066	AUTS2;AUTS2	0.0018037	3.78 ± 0.52	4.55 ± 0.54	0.0316055	4.55 ± 0.54	4.01 ± 0.43
cg22553364	PTK2B;PTK2B;PTK2B;PTK2B	0.001804	83.12 ± 1.51	81.51 ± 1.86	0.206542	81.51 ± 1.86	82.58 ± 0.92
cg05996818	TRPM7	0.0018072	3.51 ± 0.39	2.94 ± 0.19	0.063354	2.94 ± 0.19	3.22 ± 0.25
cg13211683	GDF6	0.0018073	4.16 ± 0.68	5.02 ± 0.68	0.0029413	5.02 ± 0.68	4.27 ± 0.7
cg11511314	TRAF2	0.0018089	91.66 ± 1.45	94.3 ± 1.46	0.0722728	94.3 ± 1.46	93.27 ± 1.05
cg22021644	MPZL1;MPZL1;MPZL1	0.0018111	4.78 ± 0.42	4.4 ± 0.5	0.194225	4.4 ± 0.5	4.8 ± 0.79
cg19402130	ZNF219;TMEM253	0.0018116	90.62 ± 1.01	92.72 ± 1.23	0.191769	92.72 ± 1.23	90.55 ± 2.59
cg26245549	DIP2C	0.0018117	15.5 ± 2.58	11.94 ± 2.85	0.0073139	11.94 ± 2.85	15.39 ± 1.43
cg05212510	KCNG2	0.0018145	94.92 ± 0.73	96.17 ± 0.87	0.299365	96.17 ± 0.87	95.77 ± 0.69
cg06675951	RAB7A	0.0018175	81.65 ± 2.33	84.99 ± 2.05	0.0297809	84.99 ± 2.05	82.01 ± 1.24
cg24426186	SHH	0.0018176	9.24 ± 1.35	11.72 ± 1.54	0.141685	11.72 ± 1.54	10.2 ± 0.96
cg17423198	SYNE1;SYNE1	0.0018207	56.37 ± 3.28	53.55 ± 3.13	0.0035246	53.55 ± 3.13	56.51 ± 3.04
cg07060003	Intergenic	0.0018211	88.49 ± 1.21	91.04 ± 0.93	0.0032147	91.04 ± 0.93	89 ± 1.44
cg09211336	DUS3L;DUS3L	0.0018211	4.46 ± 0.88	3.21 ± 0.52	0.0320752	3.21 ± 0.52	3.9 ± 0.33
cg20193288	TMED1	0.0018242	5.77 ± 0.81	4.4 ± 0.64	0.841647	4.4 ± 0.64	4.52 ± 0.97
cg09730912	Intergenic	0.0018249	66.47 ± 3.19	68.58 ± 3.49	0.0011703	68.58 ± 3.49	65.28 ± 3.78
cg01704703	STAG2;STAG2;STAG2;STAG2;STAG2	0.0018259	94.72 ± 1.07	96.04 ± 0.99	0.576625	96.04 ± 0.99	96.35 ± 0.91
cg19400238	MARCH1;ANP32C	0.0018263	4.76 ± 0.65	6.9 ± 0.64	0.0434929	6.9 ± 0.64	5.65 ± 0.62
cg24997298	PMP22;PMP22	0.0018274	5.34 ± 0.86	4.63 ± 0.68	0.38311	4.63 ± 0.68	5.03 ± 0.82
cg19646503	HMCN2	0.0018283	77.68 ± 2.11	80.54 ± 1.74	0.54819	80.54 ± 1.74	79.38 ± 2.81
cg15645276	LOC100188947	0.0018288	88.03 ± 1.98	91.38 ± 1.98	0.363815	91.38 ± 1.98	90.22 ± 2.09
cg06326648	CYP2R1	0.0018296	4.18 ± 0.42	3.73 ± 0.39	0.139326	3.73 ± 0.39	3.28 ± 0.46
cg10531686	MNAT1;MNAT1	0.0018302	94.23 ± 1.71	91.03 ± 2.61	0.386635	91.03 ± 2.61	92.08 ± 2.98
cg10188831	Intergenic	0.0018313	92.1 ± 2.3	94.36 ± 1.14	0.657258	94.36 ± 1.14	94.76 ± 1.1
cg00729314	MOB3C;MOB3C	0.0018315	9.37 ± 0.66	8.24 ± 0.76	0.727842	8.24 ± 0.76	8.13 ± 1.46
cg14072025	Intergenic	0.0018335	92.46 ± 2.36	95.6 ± 1.82	0.107575	95.6 ± 1.82	94.45 ± 2.16
cg14731407	CCDC159	0.0018338	54.02 ± 1.13	51.59 ± 0.94	0.18188	51.59 ± 0.94	53.03 ± 2.02
cg07574385	MED18;MED18	0.0018376	4.08 ± 0.37	3.25 ± 0.28	0.0340666	3.25 ± 0.28	4.28 ± 0.83
cg26700386	ZBED5;ZBED5;ZBED5-AS1	0.0018394	10.71 ± 1.69	8.69 ± 1.78	0.492626	8.69 ± 1.78	9.29 ± 1.79
cg16680624	NOD1	0.0018429	93.28 ± 1.79	90.29 ± 2.19	0.251858	90.29 ± 2.19	91.78 ± 1.22
cg18469103	LRRC58	0.0018456	4.11 ± 0.26	3.58 ± 0.38	0.0774454	3.58 ± 0.38	4.23 ± 0.83
cg14259717	LDHC;LDHC	0.0018464	56.93 ± 1.59	58.16 ± 2.06	0.785431	58.16 ± 2.06	57.85 ± 1.68
cg26964112	DGAT2L6	0.0018485	71.52 ± 4.96	77.64 ± 5.87	0.273154	77.64 ± 5.87	73.74 ± 5.89
cg23413954	SERINC5	0.0018489	74.8 ± 3.48	77.85 ± 3.54	0.665088	77.85 ± 3.54	76.49 ± 5.24
cg26430054	C6orf165	0.0018495	89.29 ± 2.65	86 ± 3.5	0.993782	86 ± 3.5	86.33 ± 1.03
cg12616135	KANSL1;KANSL1;KANSL1	0.00185	89.9 ± 1.5	92.33 ± 1.56	0.198147	92.33 ± 1.56	93.57 ± 1.74
cg22985019	FRMD4B	0.0018528	92.41 ± 0.71	94.53 ± 0.94	0.259107	94.53 ± 0.94	93.87 ± 1.24
cg22822803	WDR8	0.0018537	32.59 ± 2.91	38.11 ± 1.56	0.66145	38.11 ± 1.56	37.49 ± 4.22
cg14446951	CRIM1	0.0018581	92.07 ± 1.58	87.99 ± 0.85	0.20775	87.99 ± 0.85	88.92 ± 1.14
cg21922478	ITGA1	0.0018636	81.62 ± 2.03	84.07 ± 2.07	0.812746	84.07 ± 2.07	83.56 ± 3.09
cg22608572	TENM3	0.0018645	90.82 ± 1.37	89.25 ± 1.38	0.3164	89.25 ± 1.38	90.21 ± 1.5
cg03459617	DSPP	0.0018648	75.91 ± 0.69	79.8 ± 1.7	0.0227193	79.8 ± 1.7	76.83 ± 1.72
cg16501274	RNF216P1;RNF216P1;RNF216P1	0.0018649	84.81 ± 1.99	87.64 ± 1.55	0.899397	87.64 ± 1.55	87.44 ± 1.71
cg25452904	Intergenic	0.0018682	88.3 ± 1.48	92.31 ± 0.8	0.0030961	92.31 ± 0.8	90.06 ± 1.7
cg26706625	Intergenic	0.0018684	4.94 ± 0.47	5.92 ± 0.33	0.005772	5.92 ± 0.33	5.39 ± 0.47
cg16790497	Intergenic	0.0018697	8.49 ± 1.1	10.17 ± 1.36	0.0735741	10.17 ± 1.36	8.4 ± 1.34
cg03196220	USP37;RQCD1	0.0018704	5.61 ± 0.45	4.49 ± 0.36	0.100913	4.49 ± 0.36	5.02 ± 0.47
cg18702935	Intergenic	0.0018706	85.84 ± 2.72	88.9 ± 2.06	0.159374	88.9 ± 2.06	87.75 ± 2.4
cg18348178	Intergenic	0.001871	82.93 ± 1.07	85.85 ± 0.59	0.228044	85.85 ± 0.59	84.42 ± 2.08
cg15315417	ATRIP;ATRIP;ATRIP	0.0018712	58.05 ± 1.85	59.55 ± 1.69	0.403758	59.55 ± 1.69	59.88 ± 1.58
cg26544344	ZZEF1	0.0018714	96.21 ± 1.04	94.45 ± 1.69	0.0643605	94.45 ± 1.69	96.03 ± 0.69
cg25849844	Intergenic	0.0018725	95.01 ± 1.32	91.84 ± 2.54	0.481829	91.84 ± 2.54	93.18 ± 1.67
cg08548734	RALGDS	0.0018738	6.56 ± 2.11	7.66 ± 2.04	0.0378415	7.66 ± 2.04	6.78 ± 1.99
cg01760110	GNAQ	0.0018745	93.27 ± 1.19	94.84 ± 0.76	0.0065837	94.84 ± 0.76	93.62 ± 0.64
cg16164167	COL16A1	0.0018751	91.01 ± 1.68	89.42 ± 1.35	0.0017689	89.42 ± 1.35	91.94 ± 1.01
cg04976850	CLCA2	0.0018757	51.91 ± 1.79	54.21 ± 1.44	0.272487	54.21 ± 1.44	53.15 ± 1.81
cg16859356	LOC101929541;PPP2R5A	0.0018768	4.45 ± 0.54	5.45 ± 0.76	0.592927	5.45 ± 0.76	5.29 ± 1.04
cg18146370	PADI2	0.0018798	64.18 ± 2.21	61.36 ± 2.69	0.120597	61.36 ± 2.69	63.61 ± 1.25
cg03641529	SREBF1;SREBF1	0.0018832	6.72 ± 1.14	9.17 ± 0.9	0.0171345	9.17 ± 0.9	7.72 ± 1.13
cg22658649	PFAS;C17orf68	0.0018892	8.66 ± 0.84	12 ± 1.53	0.274238	12 ± 1.53	10.83 ± 1.1
cg03912169	THSD4	0.0018897	80.05 ± 1.71	78.09 ± 2.02	0.870012	78.09 ± 2.02	78.29 ± 3.07
cg24588571	PITPNB;PITPNB;PITPNB	0.001892	73.47 ± 3.61	71.02 ± 4.07	0.75995	71.02 ± 4.07	71.39 ± 3.95
cg16830861	EEPD1;EEPD1	0.0018925	3.94 ± 0.68	5.46 ± 1.38	0.132258	5.46 ± 1.38	4.54 ± 0.88
cg07368443	PLK3	0.0018937	6.62 ± 1.18	5.38 ± 0.82	0.0235212	5.38 ± 0.82	6.31 ± 0.57
cg24061613	C14orf93;C14orf93;C14orf93;C14orf93;C14orf93;C14orf93	0.001896	93.04 ± 2.19	94.75 ± 1.49	0.408303	94.75 ± 1.49	94.18 ± 0.9
cg03783546	Intergenic	0.0018978	3.59 ± 0.6	4.55 ± 1.02	0.927729	4.55 ± 1.02	4.46 ± 0.73
cg10864665	Intergenic	0.001898	3.45 ± 0.26	3.88 ± 0.44	0.205504	3.88 ± 0.44	3.45 ± 0.92
cg02613072	Intergenic	0.0018991	8.97 ± 1.17	11.91 ± 1.04	0.914475	11.91 ± 1.04	11.9 ± 2.23
cg19344749	IQSEC1	0.0019021	80.16 ± 1.47	77.58 ± 1.64	0.0762742	77.58 ± 1.64	79.11 ± 1.14
cg17185404	Intergenic	0.0019059	49.43 ± 1.45	51.88 ± 1.3	0.0018093	51.88 ± 1.3	48.75 ± 0.7
cg22855839	CTNNBL1;CTNNBL1	0.0019076	74.75 ± 2.27	77.44 ± 1.5	0.0973454	77.44 ± 1.5	74.66 ± 3.57
cg00004996	MTMR7	0.0019126	3.31 ± 0.89	4.92 ± 1.13	0.0336259	4.92 ± 1.13	3.57 ± 0.6
cg15891218	TMEM30B;TMEM30B	0.0019149	6.32 ± 1.15	5 ± 0.73	0.0811347	5 ± 0.73	5.97 ± 0.6
cg26929894	ERBB3;ERBB3	0.0019152	5 ± 0.37	4.49 ± 0.38	0.152469	4.49 ± 0.38	4.85 ± 0.45
cg04202119	Intergenic	0.0019162	93.15 ± 1.8	90.77 ± 2.69	0.822088	90.77 ± 2.69	91.17 ± 2.06
cg02836701	AHNAK	0.0019172	90.52 ± 0.92	91.84 ± 1.18	0.806033	91.84 ± 1.18	91.98 ± 0.91
cg10446832	ITIH2	0.0019173	85.85 ± 3.2	81.94 ± 3.32	0.169317	81.94 ± 3.32	84.47 ± 2.46
cg03667968	APC;APC;APC	0.0019208	5.04 ± 0.76	6.19 ± 0.7	0.0907513	6.19 ± 0.7	4.67 ± 2.3
cg26974681	Intergenic	0.0019303	5.58 ± 0.86	6.91 ± 0.91	0.165743	6.91 ± 0.91	5.8 ± 0.98
cg26152888	SLAIN2;SLAIN2	0.001932	5.92 ± 0.34	4.81 ± 0.36	0.332568	4.81 ± 0.36	5.09 ± 0.74
cg13388467	ARHGEF18;ARHGEF18	0.0019359	83.15 ± 1.46	84.34 ± 1.33	0.714096	84.34 ± 1.33	84.52 ± 1.49
cg25354776	Intergenic	0.0019379	90.62 ± 1.06	89.5 ± 1.42	0.846796	89.5 ± 1.42	89.62 ± 1.26
cg27004975	BANP;BANP	0.0019398	4.73 ± 0.77	7.81 ± 1.48	0.137924	7.81 ± 1.48	6.24 ± 1.6
cg00990261	TTL	0.0019409	88.25 ± 0.76	90.73 ± 0.54	0.67951	90.73 ± 0.54	90.92 ± 1.42
cg03067869	Intergenic	0.0019419	92.74 ± 1.02	95.32 ± 1.08	0.0354036	95.32 ± 1.08	93.28 ± 1.25
cg12136608	LRRN1	0.0019449	4.57 ± 1.09	3.44 ± 0.77	0.81167	3.44 ± 0.77	3.66 ± 1.19
cg01265281	CHDH;IL17RB	0.0019481	95.05 ± 0.81	93.27 ± 0.97	0.936183	93.27 ± 0.97	93.2 ± 1.8
cg13804838	FASN	0.0019484	81.68 ± 2.31	85.21 ± 2.3	0.0304095	85.21 ± 2.3	82.99 ± 3.14
cg13096580	MIR5572;ARNT2	0.0019531	79.53 ± 3.04	81.46 ± 2.61	0.485123	81.46 ± 2.61	80.7 ± 2.14
cg13849865	DKC1;DKC1;DKC1;DKC1;DKC1;DKC1	0.0019538	77.01 ± 2.76	83.31 ± 2.05	0.0264866	83.31 ± 2.05	80.43 ± 2.65
cg23967169	FAM19A4;FAM19A4;FAM19A4;FAM19A4	0.0019602	5.35 ± 0.54	4.63 ± 0.48	0.805993	4.63 ± 0.48	4.74 ± 0.77
cg06716730	DUSP14	0.0019609	85.83 ± 2.43	88.95 ± 1.78	0.255677	88.95 ± 1.78	88.08 ± 1.05
cg12784990	Intergenic	0.0019612	4.22 ± 0.42	5.25 ± 0.4	0.0003484	5.25 ± 0.4	4.38 ± 0.37
cg13485184	ABCB9;ABCB9;ABCB9;ABCB9;ABCB9	0.0019617	80.44 ± 2.36	82.46 ± 1.51	0.460838	82.46 ± 1.51	81.85 ± 1.62
cg02752932	Intergenic	0.0019628	87.51 ± 1.76	89.39 ± 1.89	0.0032022	89.39 ± 1.89	87.07 ± 1.98
cg08694914	Intergenic	0.0019676	79.57 ± 1.11	76.16 ± 1.48	0.797088	76.16 ± 1.48	75.97 ± 2.26
cg23591342	MRPS18B;PPP1R10	0.001971	5.76 ± 0.96	7.47 ± 1.06	0.774776	7.47 ± 1.06	7.29 ± 0.75
cg23220623	P4HB	0.001972	3.78 ± 0.8	2.83 ± 0.47	0.300087	2.83 ± 0.47	3.13 ± 0.52
cg10878459	SMARCA5	0.0019755	5.78 ± 1.28	4.19 ± 0.79	0.412581	4.19 ± 0.79	4.65 ± 0.92
cg07719884	CDC20	0.0019758	3.83 ± 0.78	4.52 ± 1.1	0.41477	4.52 ± 1.1	3.87 ± 0.68
cg19682001	RHBDD1;RHBDD1	0.0019766	38.4 ± 4.3	41.23 ± 3.41	0.581898	41.23 ± 3.41	40.43 ± 3.56
cg20210482	Intergenic	0.001978	5.14 ± 0.92	7.28 ± 1.07	0.111946	7.28 ± 1.07	6.18 ± 1.14
cg02798749	RPUSD4;RPUSD4;FAM118B;FAM118B	0.0019785	3.81 ± 0.42	4.78 ± 0.65	0.0253546	4.78 ± 0.65	3.92 ± 0.23
cg03664399	Intergenic	0.0019823	76.58 ± 1.96	74.68 ± 2.42	0.102911	74.68 ± 2.42	76.3 ± 2.66
cg11838887	UCHL3;UCHL3;COMMD6;COMMD6	0.0019824	4.64 ± 0.77	3.79 ± 0.66	0.623983	3.79 ± 0.66	4.13 ± 1.36
cg08376055	ATAD3A;ATAD3A;ATAD3A	0.0019827	6.36 ± 0.62	5.77 ± 0.59	0.730463	5.77 ± 0.59	5.64 ± 0.29
cg16921589	Intergenic	0.0019849	90.36 ± 1.66	89.63 ± 1.51	0.101354	89.63 ± 1.51	91.07 ± 1.32
cg26399819	MIER3	0.0019877	5.9 ± 1.84	7.99 ± 2.19	0.30789	7.99 ± 2.19	6.22 ± 2.2
cg03803858	VPS4B;VPS4B	0.0019888	2.69 ± 0.34	3.33 ± 0.41	0.170896	3.33 ± 0.41	2.88 ± 0.61
cg06349689	Intergenic	0.0019888	95.31 ± 0.52	94.1 ± 0.56	0.755959	94.1 ± 0.56	94.22 ± 0.49
cg18555807	NTAN1;NTAN1;NTAN1;PDXDC1	0.0019929	6.33 ± 1	5.12 ± 0.96	0.008011	5.12 ± 0.96	6.56 ± 1.49
cg00514873	Intergenic	0.0019947	97.09 ± 0.56	98.07 ± 0.26	0.107969	98.07 ± 0.26	96.97 ± 1.1
cg06139749	Intergenic	0.0019965	83.81 ± 1.65	86.14 ± 1.41	0.67899	86.14 ± 1.41	85.56 ± 1.79
cg10865515	Intergenic	0.0019987	85.93 ± 2.12	83.19 ± 2	0.274768	83.19 ± 2	84.86 ± 2.37
cg22807402	SLC25A19;SLC25A19;SLC25A19	0.0019988	64.86 ± 3.05	61.71 ± 3.48	0.962695	61.71 ± 3.48	61.78 ± 2.79
cg01708290	TARS;TARS;TARS;TARS;TARS;TARS	0.0019994	87.06 ± 1.32	90.68 ± 1.3	0.17948	90.68 ± 1.3	89.72 ± 1.42
cg15011734	SFRS8	0.0020005	94.02 ± 1.02	95.18 ± 0.98	0.911762	95.18 ± 0.98	95.06 ± 1.13
cg04949346	SPC25	0.0020008	7.15 ± 1.27	6.03 ± 1.12	0.362174	6.03 ± 1.12	6.53 ± 1.26
cg25641745	Intergenic	0.0020017	5.84 ± 0.83	7.77 ± 1.36	0.299392	7.77 ± 1.36	6.5 ± 1.6
cg10763807	CDH18;CDH18;CDH18;CDH18	0.0020025	62.85 ± 2.47	65.12 ± 2.17	0.612112	65.12 ± 2.17	64.12 ± 4.59
cg25885042	Intergenic	0.0020028	27.84 ± 2.32	30.83 ± 2.96	0.20289	30.83 ± 2.96	29.7 ± 2.53
cg23765201	TXNRD1;TXNRD1;TXNRD1;TXNRD1;TXNRD1;TXNRD1;TXNRD1	0.0020057	92.26 ± 0.86	91.3 ± 0.81	0.0389889	91.3 ± 0.81	92.44 ± 0.94
cg06383088	XPA;XPA;XPA	0.0020058	3.9 ± 0.49	4.59 ± 0.64	0.539778	4.59 ± 0.64	4.43 ± 1.17
cg22299995	IP6K2;IP6K2;IP6K2;IP6K2;IP6K2;IP6K2;IP6K2;IP6K2;IP6K2;IP6K2	0.0020093	54.34 ± 3.05	57.73 ± 4.22	0.307158	57.73 ± 4.22	56.27 ± 3.52
cg05372578	ICA1;ICA1;ICA1;ICA1	0.0020124	7.77 ± 1.47	9.14 ± 1.9	0.186837	9.14 ± 1.9	7.97 ± 0.58
cg20964248	SIK2	0.0020139	59.68 ± 4.95	64.71 ± 5.06	0.261075	64.71 ± 5.06	63 ± 7.67
cg05299823	TIAM1;TIAM1	0.0020165	91.08 ± 0.57	92.31 ± 0.8	0.915774	92.31 ± 0.8	92.19 ± 1.14
cg12583087	FGF14;FGF14	0.0020179	23.49 ± 3.96	27.45 ± 5	0.443963	27.45 ± 5	25.64 ± 3.66
cg26400543	Intergenic	0.0020182	59.2 ± 2.49	61.58 ± 3.08	0.0714892	61.58 ± 3.08	58.7 ± 2.33
cg05217094	Intergenic	0.0020184	9.2 ± 1.41	11.46 ± 1.89	0.0512653	11.46 ± 1.89	9.71 ± 1.08
cg00135815	DLEU1;DLEU2	0.0020191	3.8 ± 0.76	3.38 ± 0.71	0.847464	3.38 ± 0.71	3.27 ± 0.63
cg18921776	Intergenic	0.0020202	30.47 ± 2.01	32.92 ± 1.66	0.274831	32.92 ± 1.66	31.62 ± 3.01
cg10505267	C5orf56	0.0020206	5.48 ± 0.48	6.35 ± 0.46	0.0071195	6.35 ± 0.46	5.45 ± 0.62
cg03287930	Intergenic	0.002023	86.91 ± 2.31	91.19 ± 2.07	0.927793	91.19 ± 2.07	91.31 ± 2.21
cg21025153	CLCA2	0.002027	23.83 ± 1.56	27.43 ± 1.34	0.0354295	27.43 ± 1.34	23.43 ± 3.75
cg06295223	PRDM7	0.0020309	7.15 ± 0.62	8.1 ± 0.58	0.185656	8.1 ± 0.58	7.18 ± 1.19
cg09432409	Intergenic	0.002031	54.31 ± 1.27	57.11 ± 1.72	0.124485	57.11 ± 1.72	55.74 ± 1.28
cg02278087	DENND5B	0.0020337	78.6 ± 2.3	81.65 ± 2.04	0.705645	81.65 ± 2.04	81.42 ± 2.19
cg23232832	EPHB2;EPHB2	0.0020354	89.14 ± 2.4	92.38 ± 0.74	0.0721582	92.38 ± 0.74	90.66 ± 1.4
cg16704081	Intergenic	0.0020355	21.33 ± 0.71	23.35 ± 1.35	0.226768	23.35 ± 1.35	21.75 ± 1.95
cg12762718	LRRC6;LRRC6	0.0020382	37.86 ± 3.53	43.46 ± 2.05	0.0181391	43.46 ± 2.05	38.59 ± 3.02
cg00031013	KDM6B;TMEM88	0.0020401	49.47 ± 1.15	52.45 ± 2.05	0.002209	52.45 ± 2.05	50.09 ± 2.18
cg15679978	MCM9	0.0020413	5.09 ± 0.49	5.65 ± 0.68	0.686376	5.65 ± 0.68	5.86 ± 0.9
cg00018606	CRYGD	0.0020423	51.72 ± 2.37	54.11 ± 2.09	0.684118	54.11 ± 2.09	54.46 ± 2.52
cg04177635	OR5C1	0.0020427	54.86 ± 2.73	57.78 ± 3.28	0.119885	57.78 ± 3.28	55.51 ± 2.58
cg12944045	PPY2	0.0020444	91.33 ± 1.46	88.85 ± 1.23	0.151073	88.85 ± 1.23	90.26 ± 1.68
cg08481112	GNG7	0.0020459	75.68 ± 2.87	78.74 ± 1.85	0.0257684	78.74 ± 1.85	76.66 ± 0.8
cg01160763	Intergenic	0.0020461	33.34 ± 0.9	35.83 ± 1.05	0.275773	35.83 ± 1.05	35.28 ± 1.24
cg17455208	TNS3	0.0020506	92.21 ± 2.28	87.1 ± 4.23	0.0448438	87.1 ± 4.23	92.51 ± 2.31
cg03331853	MED4	0.0020517	46.26 ± 1.37	48.16 ± 1.17	0.32074	48.16 ± 1.17	46.81 ± 2.17
cg20711585	MAST2	0.0020524	51 ± 2.37	54.69 ± 1.97	0.977707	54.69 ± 1.97	54.74 ± 2.74
cg06936388	TDP1;TDP1	0.0020526	93.07 ± 1.5	96.6 ± 0.63	0.29634	96.6 ± 0.63	96.14 ± 0.71
cg04501757	Intergenic	0.0020534	6.37 ± 0.77	7.86 ± 0.87	0.276341	7.86 ± 0.87	7.25 ± 0.54
cg00275149	MLLT10;MLLT10	0.0020535	94.39 ± 1	91.26 ± 1.64	0.296815	91.26 ± 1.64	92.67 ± 2.74
cg07955356	DNASE2	0.0020535	4.74 ± 0.63	5.63 ± 0.62	0.651138	5.63 ± 0.62	5.42 ± 0.74
cg03128463	SERHL;RRP7A	0.0020561	52.8 ± 4.05	54.13 ± 4.45	0.166766	54.13 ± 4.45	52.6 ± 4.31
cg06798008	Intergenic	0.0020578	85.68 ± 1.25	89.88 ± 1.73	0.0408693	89.88 ± 1.73	87.2 ± 2.05
cg02510519	MRPS25;MRPS25	0.0020588	4.7 ± 0.69	3.69 ± 0.36	0.0003994	3.69 ± 0.36	4.96 ± 0.45
cg04156293	ACHE;ACHE	0.0020594	18.27 ± 1.6	16.25 ± 2.14	0.783937	16.25 ± 2.14	15.94 ± 2.35
cg25247083	Intergenic	0.0020599	93.7 ± 1.25	91.84 ± 1.33	0.187465	91.84 ± 1.33	92.62 ± 1.2
cg07201638	CLDN17	0.0020619	41.16 ± 1.94	42.84 ± 2.25	0.159137	42.84 ± 2.25	41.54 ± 1.7
cg02054559	DUSP3;C17orf105	0.0020626	6.86 ± 0.87	5.48 ± 1.1	0.965633	5.48 ± 1.1	5.38 ± 0.31
cg04637597	NIF3L1;PPIL3;PPIL3;NIF3L1;NIF3L1;NIF3L1;PPIL3	0.0020665	4.83 ± 0.85	3.98 ± 0.5	0.931652	3.98 ± 0.5	3.99 ± 0.87
cg04360223	Intergenic	0.0020675	49.53 ± 3.68	50.46 ± 3.53	0.488096	50.46 ± 3.53	51.16 ± 2.32
cg02194789	SIM2;SIM2	0.002069	7.83 ± 1.3	9.48 ± 1.46	0.070772	9.48 ± 1.46	8.35 ± 1.7
cg17948136	Intergenic	0.0020695	13.88 ± 0.88	16.26 ± 0.59	0.416492	16.26 ± 0.59	15.51 ± 1.85
cg19203115	B4GALT6	0.0020696	27.13 ± 2.89	32.54 ± 2.61	0.0163178	32.54 ± 2.61	30.24 ± 2.01
cg10204344	Intergenic	0.00207	5.92 ± 0.78	4.72 ± 0.64	0.749799	4.72 ± 0.64	4.84 ± 0.46
cg21590385	ATP1A2	0.0020737	17.52 ± 0.92	19.92 ± 1.32	0.141397	19.92 ± 1.32	18.08 ± 2.12
cg04474326	TH1L	0.0020745	7.12 ± 0.96	8.05 ± 0.96	0.222638	8.05 ± 0.96	7.51 ± 1.2
cg07742264	HNF1A;HNF1A	0.0020751	9.32 ± 2.06	10.39 ± 2.21	0.0194199	10.39 ± 2.21	9.62 ± 1.91
cg21821329	KIRREL3;KIRREL3	0.0020754	92.91 ± 0.81	90.78 ± 0.53	0.473887	90.78 ± 0.53	91.21 ± 1.8
cg09198782	SLC22A18AS;SLC22A18;SLC22A18	0.0020761	58.99 ± 1.73	62.22 ± 1.2	0.0034834	62.22 ± 1.2	60.91 ± 1.65
cg20611731	KAZN;KAZN;KAZN;KAZN;KAZN	0.0020761	66.67 ± 2.94	69.1 ± 2.75	0.137735	69.1 ± 2.75	68.01 ± 2.85
cg04258926	TNXB	0.0020797	5.85 ± 0.61	6.25 ± 0.73	0.578692	6.25 ± 0.73	6.81 ± 1.83
cg10121559	Intergenic	0.00208	85.9 ± 1.76	88.6 ± 1.81	0.794533	88.6 ± 1.81	88.37 ± 1.58
cg26314089	Intergenic	0.0020838	85.78 ± 1.02	87.57 ± 1.21	0.56355	87.57 ± 1.21	87.97 ± 2
cg03671802	RAX	0.002087	50.04 ± 3.85	53.07 ± 4.39	0.636772	53.07 ± 4.39	52.82 ± 3.85
cg14587018	Intergenic	0.0020959	24.14 ± 1.89	26.4 ± 2.76	0.0872306	26.4 ± 2.76	24.62 ± 1.89
cg05550145	Intergenic	0.0020966	75.36 ± 3.48	78.35 ± 2.77	0.0189502	78.35 ± 2.77	75.49 ± 3.65
cg26828601	Intergenic	0.0020977	6.08 ± 0.76	5.08 ± 0.63	0.193424	5.08 ± 0.63	6.11 ± 1.26
cg12563240	AMN1;AMN1	0.0021044	4.92 ± 0.45	4.01 ± 0.34	0.220027	4.01 ± 0.34	3.67 ± 0.64
cg17002994	FGF14	0.0021055	74.12 ± 2.93	76.17 ± 2.43	0.490409	76.17 ± 2.43	75.51 ± 2.41
cg13440645	NUP43	0.0021068	4.69 ± 0.51	4 ± 0.29	0.231156	4 ± 0.29	4.75 ± 1.09
cg00388287	Intergenic	0.0021077	88.88 ± 1.99	86.44 ± 1.82	0.586941	86.44 ± 1.82	87.1 ± 3.19
cg23984710	Intergenic	0.0021079	44.67 ± 4.64	48.27 ± 4.75	0.0205579	48.27 ± 4.75	44.22 ± 5.17
cg22451134	Intergenic	0.0021087	62.76 ± 1.78	65.05 ± 1.48	0.489998	65.05 ± 1.48	64.25 ± 1.4
cg12213862	GAB3;GAB3;GAB3;GAB3	0.0021094	91.49 ± 1.34	89.79 ± 1.77	0.459679	89.79 ± 1.77	90.62 ± 1.72
cg10640371	SLC5A3;SLC5A3;MRPS6	0.00211	3.9 ± 0.28	3.17 ± 0.32	0.0147731	3.17 ± 0.32	3.95 ± 0.37
cg11470149	WDR4	0.00211	90.18 ± 1.49	91.86 ± 1.08	0.708893	91.86 ± 1.08	92.09 ± 1.79
cg23804064	SLC10A1	0.0021105	81.38 ± 1.1	83.22 ± 1.38	0.182828	83.22 ± 1.38	81.96 ± 1.45
cg09119881	Intergenic	0.0021111	15.27 ± 0.93	16.41 ± 0.97	0.798311	16.41 ± 0.97	16.48 ± 0.92
cg03947233	NDRG4;NDRG4;NDRG4	0.0021115	90.48 ± 1.07	93.32 ± 0.91	0.0308964	93.32 ± 0.91	91.25 ± 0.95
cg26081162	C6orf141;C6orf141	0.0021134	10.26 ± 0.73	12.14 ± 0.83	0.164759	12.14 ± 0.83	10.71 ± 2.7
cg03141675	Intergenic	0.0021147	84.8 ± 0.71	82.1 ± 1.28	0.0055816	82.1 ± 1.28	84.31 ± 1.13
cg23352271	Intergenic	0.0021178	8.81 ± 0.87	7.19 ± 0.51	0.0411796	7.19 ± 0.51	9.11 ± 1.57
cg26473189	KLRAQ1;KLRAQ1;KLRAQ1;KLRAQ1	0.0021189	81.57 ± 2.51	85.27 ± 2.11	0.0358895	85.27 ± 2.11	82.89 ± 2.49
cg21763565	FGFBP1	0.002122	40.47 ± 2.04	43.22 ± 2.35	0.818352	43.22 ± 2.35	42.77 ± 2.67
cg21371012	SAMD12;SAMD12	0.0021232	81.63 ± 1.58	79.54 ± 1.5	0.561136	79.54 ± 1.5	79.08 ± 2.26
cg05775289	Intergenic	0.002126	7.43 ± 0.96	10.48 ± 2.58	0.0899167	10.48 ± 2.58	7.74 ± 1.77
cg26691449	Intergenic	0.002127	37.75 ± 1.56	39.62 ± 1.47	0.614977	39.62 ± 1.47	39.26 ± 1.04
cg16236851	Intergenic	0.0021289	37.74 ± 1.27	39.7 ± 1.53	0.221202	39.7 ± 1.53	38.66 ± 1.98
cg02160083	Intergenic	0.0021292	13.21 ± 1.07	15.25 ± 2.1	0.0240328	15.25 ± 2.1	12.51 ± 1.96
cg13598111	EGFR;EGFR;EGFR;EGFR	0.0021336	58.27 ± 2.22	54.41 ± 3.23	0.542186	54.41 ± 3.23	55.67 ± 1.97
cg14244793	MAN1B1	0.0021342	78.43 ± 1.25	81.13 ± 1.12	0.190915	81.13 ± 1.12	80.4 ± 1.17
cg13685679	SLC38A10;SLC38A10	0.0021357	75.32 ± 1.61	78.98 ± 1.22	0.0094098	78.98 ± 1.22	77.83 ± 1.35
cg10529576	Intergenic	0.002138	5.85 ± 0.59	4.79 ± 0.37	0.248681	4.79 ± 0.37	4.54 ± 0.2
cg15361247	SACM1L	0.0021397	94.8 ± 0.68	96.19 ± 0.65	0.358758	96.19 ± 0.65	95.49 ± 1.59
cg13149710	Intergenic	0.0021398	92.84 ± 0.91	93.93 ± 1.05	0.120149	93.93 ± 1.05	92.17 ± 1.85
cg15651897	CDHR3;CDHR3	0.0021398	86.6 ± 1.67	89.02 ± 0.77	0.543921	89.02 ± 0.77	88.76 ± 1.2
cg16748413	Intergenic	0.0021418	38.2 ± 3.74	45.09 ± 3.04	0.200218	45.09 ± 3.04	41.98 ± 4.32
cg20056914	PSMB11	0.0021418	90.52 ± 0.8	88.52 ± 0.54	0.124474	88.52 ± 0.54	89.45 ± 1.47
cg07347315	PDLIM1	0.0021429	13 ± 2.13	15.58 ± 2.53	0.494212	15.58 ± 2.53	14.61 ± 2.27
cg16875498	CACNA1C;CACNA1C;CACNA1C;CACNA1C;CACNA1C;CACNA1C;CACNA1C;CACNA1C;CACNA1C;CACNA1C;CACNA1C;CACNA1C;CACNA1C;CACNA1C;CACNA1C;CACNA1C;CACNA1C;CACNA1C;CACNA1C;CACNA1C;CACNA1C;CACNA1C;CACNA1C	0.0021434	91.79 ± 0.63	90.62 ± 0.93	0.479091	90.62 ± 0.93	91.17 ± 1.8
cg03393444	MADD;MADD;MADD;MADD;MADD;MADD;MADD;MADD;MADD;MADD	0.0021438	47.81 ± 1.18	49.71 ± 1.43	0.233983	49.71 ± 1.43	48.78 ± 2.3
cg11608005	Intergenic	0.0021439	79.42 ± 2.02	82.48 ± 2.53	0.0937359	82.48 ± 2.53	80.14 ± 1.05
cg07247167	LIM2;LIM2	0.0021456	25.22 ± 1.08	26.6 ± 1	0.0145518	26.6 ± 1	24.45 ± 0.72
cg11839415	MPL	0.0021456	5.87 ± 0.48	4.35 ± 0.35	0.125373	4.35 ± 0.35	5.06 ± 0.77
cg11432315	SHISA5;SHISA5;SHISA5;SHISA5;SHISA5;SHISA5;SHISA5	0.0021462	10.25 ± 3.3	12.11 ± 3.78	0.62137	12.11 ± 3.78	11.44 ± 2.5
cg13646464	Intergenic	0.0021462	43.04 ± 1.74	46.27 ± 1.98	0.17083	46.27 ± 1.98	44.64 ± 2.64
cg24565204	GALNT7	0.0021477	71.67 ± 1.44	68.83 ± 1.36	0.0091154	68.83 ± 1.36	70.85 ± 1.13
cg25396971	ZNF879	0.0021516	6.03 ± 0.61	4.9 ± 0.42	0.0754398	4.9 ± 0.42	5.45 ± 0.9
cg18122215	MEG8	0.0021527	51.48 ± 2.06	53.97 ± 1.95	0.934934	53.97 ± 1.95	54.08 ± 1.83
cg27639942	Intergenic	0.002153	47.89 ± 1.74	49.85 ± 1.15	0.109403	49.85 ± 1.15	48.53 ± 1.76
cg23091104	TMEM164;TMEM164;TMEM164	0.0021532	7.01 ± 0.54	5.89 ± 0.74	0.656542	5.89 ± 0.74	6.03 ± 0.94
cg10723418	GSAP	0.0021557	88.81 ± 1.69	87.45 ± 1.64	0.731593	87.45 ± 1.64	87.72 ± 2.26
cg04750595	Intergenic	0.0021561	32.33 ± 5.61	27.24 ± 5.11	0.244924	27.24 ± 5.11	29.8 ± 3.85
cg10969205	SACM1L	0.0021578	4.25 ± 0.54	3.79 ± 0.59	0.179555	3.79 ± 0.59	4.09 ± 0.31
cg09785144	MIR548W	0.0021603	80.09 ± 1.42	78.36 ± 1.01	0.788705	78.36 ± 1.01	78.15 ± 1.18
cg05002305	MUC5B	0.0021617	39.44 ± 1.07	37 ± 0.87	0.0795263	37 ± 0.87	37.93 ± 0.45
cg04044227	ATE1;ATE1;ATE1;ATE1;ATE1;ATE1	0.0021634	91.03 ± 2.28	94.47 ± 1.1	0.339274	94.47 ± 1.1	93.21 ± 2.15
cg06118578	RTTN;RTTN	0.0021635	4.69 ± 0.43	3.95 ± 0.37	0.927132	3.95 ± 0.37	3.99 ± 0.6
cg15791948	SFXN2	0.0021676	68.54 ± 5.14	78.73 ± 1.83	0.626994	78.73 ± 1.83	77.84 ± 2.94
cg08248964	CELSR1	0.0021686	86.68 ± 2.14	88.44 ± 1.5	0.9107	88.44 ± 1.5	88.53 ± 0.76
cg03240700	PRDM4;LOC101929162	0.0021695	88.39 ± 1.49	91.34 ± 1.45	0.729467	91.34 ± 1.45	91.53 ± 2.44
cg18685995	PREPL;PREPL;C2orf34;PREPL;PREPL;PREPL;PREPL;PREPL	0.002171	3.18 ± 0.44	2.73 ± 0.33	0.273521	2.73 ± 0.33	3.16 ± 0.84
cg20916520	ERG;ERG;ERG;ERG;ERG;ERG;ERG;ERG	0.0021725	57.63 ± 4.12	55.05 ± 3.95	0.423444	55.05 ± 3.95	55.75 ± 2.8
cg25299750	TCP11;TCP11;TCP11;TCP11	0.0021729	10.84 ± 0.82	12.92 ± 0.89	0.272841	12.92 ± 0.89	12.14 ± 1.64
cg22067466	Intergenic	0.0021746	57.34 ± 2.67	56.54 ± 2.76	0.998995	56.54 ± 2.76	56.54 ± 2.63
cg06873166	PTPN5;PTPN5;PTPN5;PTPN5;PTPN5;PTPN5	0.0021754	21.98 ± 1.67	19.72 ± 1.73	0.341863	19.72 ± 1.73	21.01 ± 3.09
cg02322140	USP7	0.0021758	3.74 ± 0.35	4.94 ± 0.6	0.215913	4.94 ± 0.6	4.49 ± 0.52
cg10729878	Intergenic	0.0021792	31.71 ± 5.45	37.02 ± 4.87	0.189377	37.02 ± 4.87	35.03 ± 4.31
cg18746650	FLJ21408	0.0021799	5.63 ± 0.81	6.6 ± 0.82	0.0009837	6.6 ± 0.82	5.47 ± 0.94
cg10351452	ROBO1;ROBO1;ROBO1;ROBO1	0.0021804	54.38 ± 1.03	56.81 ± 0.65	0.123953	56.81 ± 0.65	58.04 ± 1.53
cg23496393	USP4;USP4;USP4	0.0021835	92.21 ± 1.27	94.16 ± 0.88	0.486062	94.16 ± 0.88	93.47 ± 1.73
cg09975779	TDRD1	0.0021848	84.74 ± 1.48	80.89 ± 2.63	0.139387	80.89 ± 2.63	82.48 ± 1.17
cg08610862	LHX9;LHX9	0.0021851	41.66 ± 3.66	49.84 ± 3.08	0.249782	49.84 ± 3.08	48.22 ± 2.88
cg14962628	C4orf40	0.0021852	63.69 ± 3.04	66.45 ± 2.79	0.194277	66.45 ± 2.79	65.16 ± 2.74
cg23861127	RNF121;IL18BP;RNF121;RNF121;IL18BP	0.0021855	88.84 ± 1	86.43 ± 0.93	0.0107995	86.43 ± 0.93	88.19 ± 1.4
cg21888059	FYN;FYN;FYN	0.002188	93.04 ± 1.7	94.4 ± 1.33	0.431717	94.4 ± 1.33	93.88 ± 1.09
cg10026613	FAM71A;FAM71A	0.0021899	85.99 ± 1.18	87.66 ± 1.12	0.396646	87.66 ± 1.12	86.86 ± 1.68
cg15459142	Intergenic	0.002191	8.41 ± 1.62	10.59 ± 2.23	0.0420698	10.59 ± 2.23	7.82 ± 2.1
cg23586177	Intergenic	0.0021924	56.66 ± 1.6	58.88 ± 1.52	0.035993	58.88 ± 1.52	58.11 ± 0.96
cg05797982	ZNF366	0.0021936	64.92 ± 2.16	68.1 ± 1.44	0.002786	68.1 ± 1.44	64.88 ± 1.64
cg26264769	Intergenic	0.0021941	6.28 ± 0.57	5.49 ± 0.58	0.002755	5.49 ± 0.58	6.35 ± 0.63
cg03894557	ARPP19;ARPP19;ARPP19;ARPP19	0.0021944	89.03 ± 1.2	86.94 ± 1.57	0.221354	86.94 ± 1.57	88.19 ± 1.5
cg03494429	Intergenic	0.0021957	3.66 ± 0.38	4.52 ± 0.36	0.642039	4.52 ± 0.36	4.64 ± 0.54
cg16362170	B4GALT1-AS1;B4GALT1;B4GALT1-AS1;B4GALT1-AS1	0.0021962	4.22 ± 0.65	5.02 ± 0.67	0.129387	5.02 ± 0.67	4.38 ± 0.6
cg13024807	ELOVL5	0.0021963	61.25 ± 3.14	64.62 ± 4	0.187565	64.62 ± 4	63.17 ± 4.23
cg12862002	PSMB9;PSMB9;TAP1	0.0021978	4.73 ± 1.5	3.16 ± 1.25	0.161234	3.16 ± 1.25	4.25 ± 0.84
cg24818486	ZNF436-AS1;ZNF436-AS1;ZNF436	0.0022022	56.92 ± 2.05	58.91 ± 2.3	0.0744495	58.91 ± 2.3	57.02 ± 1.92
cg17819420	LOC100131801;LOC100131801;XAB2	0.0022048	3.87 ± 0.53	3.32 ± 0.27	0.0043267	3.32 ± 0.27	4.08 ± 0.28
cg13575542	Intergenic	0.0022097	27.33 ± 1.42	29.25 ± 1.61	0.595383	29.25 ± 1.61	28.69 ± 2.24
cg11727304	GALNTL5;GALNTL5;GALNTL5	0.00221	89.7 ± 3.04	92.8 ± 2.21	0.0060175	92.8 ± 2.21	87.84 ± 3.39
cg09759523	ITIH5;ITIH5;ITIH5	0.0022115	94.43 ± 0.6	95.75 ± 0.4	0.211758	95.75 ± 0.4	94.83 ± 1.36
cg09526215	LOC653391;LOC100170939	0.0022117	78.48 ± 8.37	83.05 ± 8.63	0.352193	83.05 ± 8.63	85.39 ± 5.02
cg16833232	Intergenic	0.0022135	5.85 ± 0.72	6.86 ± 0.6	0.288304	6.86 ± 0.6	6.33 ± 0.77
cg13874498	Intergenic	0.0022167	83.27 ± 1.75	80.48 ± 1.33	0.76296	80.48 ± 1.33	80.73 ± 4.19
cg11719371	L3MBTL4	0.0022204	7.04 ± 0.95	8.93 ± 0.67	0.225435	8.93 ± 0.67	8.56 ± 1.18
cg17076539	Intergenic	0.0022222	6.41 ± 0.67	5.35 ± 0.65	0.620149	5.35 ± 0.65	5.6 ± 0.58
cg18737473	MCF2L;MCF2L	0.002223	71.05 ± 1.32	72.86 ± 0.98	0.213039	72.86 ± 0.98	71.52 ± 1.38
cg07145038	Intergenic	0.0022231	52.99 ± 1.76	55.72 ± 2.58	0.4514	55.72 ± 2.58	55.1 ± 2.69
cg22049718	WDFY4	0.0022242	29.77 ± 0.8	32.38 ± 1.17	0.958637	32.38 ± 1.17	32.34 ± 0.94
cg18726757	DOCK9;DOCK9;DOCK9;DOCK9	0.0022253	93.5 ± 1.28	90.93 ± 0.99	0.0427902	90.93 ± 0.99	92.75 ± 1.57
cg02288754	SALL1;SALL1	0.0022258	51.51 ± 1.4	53.73 ± 1.55	0.0783357	53.73 ± 1.55	51.75 ± 2.4
cg24251441	USP24	0.0022261	88.96 ± 0.8	86.5 ± 1.1	0.657748	86.5 ± 1.1	87 ± 3.3
cg03760236	Intergenic	0.0022266	64.39 ± 2.42	59.79 ± 2.11	0.0306799	59.79 ± 2.11	61.84 ± 1.39
cg11145648	WDR53	0.0022295	91.35 ± 2.41	94.33 ± 0.84	0.71659	94.33 ± 0.84	94.52 ± 0.8
cg09207578	RASA3	0.0022302	28.14 ± 4.94	25.65 ± 4.01	0.569642	25.65 ± 4.01	25.87 ± 3.8
cg24283049	WNT5B;WNT5B	0.0022303	83.21 ± 3.24	87.73 ± 1.95	0.175357	87.73 ± 1.95	85.85 ± 1.9
cg00371829	NRG4	0.0022327	10.54 ± 3.56	15.68 ± 2.46	0.0807086	15.68 ± 2.46	13.4 ± 2.4
cg06346837	IQSEC1	0.0022379	53.48 ± 1.89	55.44 ± 1.73	0.0506818	55.44 ± 1.73	53.77 ± 1.04
cg12919527	MKNK1;MKNK1;MKNK1;MKNK1;MKNK1	0.0022431	92.86 ± 1.05	90.99 ± 0.89	0.254592	90.99 ± 0.89	92.1 ± 2.07
cg14628799	NOL4L	0.0022432	67.43 ± 2.37	68.68 ± 2.19	0.793602	68.68 ± 2.19	68.87 ± 2.42
cg22358708	C1orf25;C1orf26;C1orf26	0.0022434	4.23 ± 1.1	3.45 ± 1.05	0.82959	3.45 ± 1.05	3.64 ± 1.16
cg24904857	Intergenic	0.0022457	61.25 ± 1.95	64.11 ± 1.5	0.256873	64.11 ± 1.5	63.13 ± 0.84
cg02224722	Intergenic	0.0022484	12.16 ± 1.97	15.4 ± 1.29	0.0261382	15.4 ± 1.29	12.65 ± 1.17
cg12371681	SNX4	0.0022501	5.25 ± 0.72	6.24 ± 1.12	0.356908	6.24 ± 1.12	5.77 ± 0.97
cg17586984	DNAJC3	0.0022519	6.77 ± 0.75	5.66 ± 0.77	0.741623	5.66 ± 0.77	5.89 ± 1.07
cg02189431	C7orf50;C7orf50;C7orf50	0.0022526	86.38 ± 2.66	89.43 ± 1.15	0.143613	89.43 ± 1.15	88.14 ± 1.79
cg10237978	HKR1	0.0022527	5.17 ± 0.4	4.11 ± 0.46	0.040321	4.11 ± 0.46	4.98 ± 0.66
cg21881798	C11orf17;C11orf17;ST5	0.0022543	19.3 ± 2.33	22.22 ± 3.64	0.801431	22.22 ± 3.64	22.81 ± 3.54
cg00858738	Intergenic	0.002255	11.3 ± 1.42	13.95 ± 1.33	0.040553	13.95 ± 1.33	11.34 ± 1.55
cg05080444	RERE;RERE	0.0022558	93.65 ± 1.34	94.69 ± 1.02	0.0729185	94.69 ± 1.02	92.66 ± 2.15
cg17017584	Intergenic	0.0022562	47.81 ± 3.11	49.44 ± 3.27	0.06119	49.44 ± 3.27	50.79 ± 3.9
cg06807343	Intergenic	0.0022607	37.3 ± 1.25	38.73 ± 1.66	0.209868	38.73 ± 1.66	37.18 ± 1.89
cg20238678	HDAC9;HDAC9;HDAC9;HDAC9;HDAC9;HDAC9;HDAC9;HDAC9;HDAC9	0.0022617	83.51 ± 1.4	86.44 ± 2.11	0.685229	86.44 ± 2.11	86.96 ± 2.06
cg08301941	G6PC3;G6PC3;G6PC3	0.0022619	4.36 ± 0.37	3.21 ± 0.62	0.677973	3.21 ± 0.62	3.37 ± 0.49
cg12038759	CEP290	0.0022621	80.97 ± 4.83	87.32 ± 2.61	0.12688	87.32 ± 2.61	84.37 ± 4.05
cg07665923	C7orf50;C7orf50;C7orf50	0.0022623	89.49 ± 4.71	85.18 ± 5.35	0.31858	85.18 ± 5.35	88.98 ± 3.89
cg06838840	Intergenic	0.0022683	89.46 ± 1.56	92.61 ± 1.99	0.0585079	92.61 ± 1.99	91.18 ± 0.99
cg16831491	ERCC8;ERCC8;ERCC8;ERCC8;NDUFAF2	0.0022713	3.44 ± 0.64	4.49 ± 0.49	0.249919	4.49 ± 0.49	3.75 ± 1.11
cg21832991	Intergenic	0.0022733	5.65 ± 0.98	4.31 ± 0.54	0.0691627	4.31 ± 0.54	5.42 ± 0.92
cg03053290	RWDD3;RWDD3	0.0022761	93.43 ± 1.21	96.08 ± 0.93	0.871776	96.08 ± 0.93	96.11 ± 1.34
cg06011186	Intergenic	0.0022792	34.11 ± 1.91	36.35 ± 1.98	0.429241	36.35 ± 1.98	35.52 ± 0.7
cg08686077	HDGFL1	0.0022792	89.34 ± 1.71	86.61 ± 2.79	0.77535	86.61 ± 2.79	87.14 ± 1.36
cg09799593	GPR62	0.00228	54.99 ± 2.07	57.98 ± 0.85	0.506453	57.98 ± 0.85	56.88 ± 3.72
cg16279084	Intergenic	0.0022819	24.6 ± 2.85	26.29 ± 2.51	0.680174	26.29 ± 2.51	25.99 ± 3.34
cg16251489	XYLT1	0.0022826	40.02 ± 2.04	38.13 ± 1.75	0.349364	38.13 ± 1.75	38.55 ± 1.84
cg16317718	RGMB	0.0022838	5.38 ± 0.76	6.09 ± 0.84	0.195576	6.09 ± 0.84	6.92 ± 1.18
cg12725760	Intergenic	0.0022839	80.81 ± 3.69	77.95 ± 4.25	0.87317	77.95 ± 4.25	78.28 ± 4.21
cg20605626	SCGN	0.0022872	4.15 ± 0.35	5.84 ± 0.77	0.0079597	5.84 ± 0.77	4.62 ± 0.51
cg19921746	THSD4	0.0022895	18.82 ± 3.83	15.62 ± 2.44	0.843626	15.62 ± 2.44	16.63 ± 5.34
cg11166884	Intergenic	0.0022898	93.33 ± 1.2	95.31 ± 0.81	0.730552	95.31 ± 0.81	95.09 ± 0.79
cg20406347	MORN1	0.0022903	84.34 ± 0.75	85.44 ± 0.77	0.190782	85.44 ± 0.77	86.28 ± 1.16
cg04172332	PI16	0.0022921	95.12 ± 0.83	92.81 ± 2.18	0.354224	92.81 ± 2.18	94.11 ± 2.84
cg01590424	Intergenic	0.0022924	70.8 ± 4.02	68.06 ± 5.03	0.447081	68.06 ± 5.03	69.56 ± 7.49
cg23946400	RUNDC1;AARSD1;AARSD1;AARSD1;AARSD1	0.0022963	6.64 ± 0.46	5.99 ± 0.36	0.981736	5.99 ± 0.36	6.11 ± 1.32
cg06314748	Intergenic	0.0022996	89.37 ± 1.39	93.26 ± 0.7	0.0289455	93.26 ± 0.7	90.55 ± 2.02
cg26174306	MAP2K1	0.0022999	95.85 ± 1.51	94.2 ± 1.4	0.0203992	94.2 ± 1.4	96.19 ± 0.9
cg06562291	S100A13;S100A13;S100A13;S100A13;S100A13;S100A1	0.002302	48.57 ± 0.47	49.97 ± 0.54	0.0087278	49.97 ± 0.54	47.88 ± 0.89
cg12220058	NMB;NMB	0.002302	92.32 ± 1.2	93.32 ± 1.35	0.789797	93.32 ± 1.35	93.16 ± 1.55
cg06324048	GNAS;GNAS;GNAS;GNASAS	0.0023021	89.89 ± 1.36	92.28 ± 0.74	0.825132	92.28 ± 0.74	92.24 ± 0.44
cg15252951	LEMD2	0.0023031	4.22 ± 0.69	5.57 ± 1.12	0.444362	5.57 ± 1.12	5.05 ± 1.19
cg14829677	AUTS2;AUTS2	0.0023037	64.94 ± 1.52	63.12 ± 2.06	0.658786	63.12 ± 2.06	63.73 ± 2.69
cg11870843	Intergenic	0.0023041	85.45 ± 2.17	82.57 ± 3.09	0.362826	82.57 ± 3.09	81.06 ± 2.84
cg00473929	ZNF30;ZNF30;ZNF30;ZNF30	0.0023045	39.71 ± 3.02	43.35 ± 3.5	0.295564	43.35 ± 3.5	41.33 ± 3.52
cg11712089	PMP22;PMP22;PMP22;PMP22;PMP22;PMP22;PMP22	0.0023046	8.94 ± 1	11.05 ± 1.44	0.120666	11.05 ± 1.44	8.57 ± 2.04
cg15539962	LLGL2;LLGL2	0.0023102	79.06 ± 6.53	81.13 ± 6.48	0.424935	81.13 ± 6.48	80.47 ± 6.04
cg12143756	MYOM2	0.0023103	9.51 ± 0.56	11.45 ± 1.27	0.0081428	11.45 ± 1.27	9.83 ± 0.88
cg07353306	TAP2;TAP2	0.002315	84.04 ± 2.93	87.81 ± 2.66	0.922319	87.81 ± 2.66	87.52 ± 3.62
cg10532604	Intergenic	0.0023194	86.39 ± 4.47	91.28 ± 2.73	0.391977	91.28 ± 2.73	88.59 ± 3.72
cg10761364	Intergenic	0.0023221	5.96 ± 0.92	7.83 ± 1.03	0.98258	7.83 ± 1.03	7.94 ± 1.62
cg27033727	VPS39;VPS39	0.0023234	92.24 ± 0.93	89.85 ± 1.47	0.439833	89.85 ± 1.47	90.54 ± 1.3
cg00872695	Intergenic	0.002326	11.88 ± 0.75	13.09 ± 1.31	0.27589	13.09 ± 1.31	11.72 ± 1.84
cg06413272	Intergenic	0.0023261	77.21 ± 5.3	79.2 ± 4.4	0.742423	79.2 ± 4.4	80.07 ± 3.75
cg22649027	Intergenic	0.0023287	17.46 ± 2.32	20.68 ± 1.92	0.0390384	20.68 ± 1.92	18.97 ± 2.08
cg16438031	Intergenic	0.002329	58.01 ± 4	60.87 ± 4.67	0.300376	60.87 ± 4.67	59.18 ± 3.67
cg01397800	Intergenic	0.0023294	80.92 ± 1.42	82.74 ± 0.71	0.729594	82.74 ± 0.71	83.03 ± 3.38
cg01837523	NT5C2;NT5C2	0.0023296	91.33 ± 1.5	87.65 ± 1.22	0.402313	87.65 ± 1.22	88.85 ± 3.78
cg10434120	PREX1	0.0023347	78.48 ± 2.03	81.53 ± 1.44	0.170644	81.53 ± 1.44	79.86 ± 2.3
cg00546268	DBX2	0.0023358	52.19 ± 1.63	57.26 ± 2.75	0.410368	57.26 ± 2.75	55.39 ± 3.53
cg16692892	MAML1	0.0023358	6.99 ± 1.43	8.06 ± 1.57	0.653871	8.06 ± 1.57	7.63 ± 1.24
cg08627269	Intergenic	0.0023366	60.04 ± 3.45	57.06 ± 3.88	0.968853	57.06 ± 3.88	57.09 ± 5.09
cg22498119	Intergenic	0.0023366	37.97 ± 1.51	40.57 ± 1.35	0.305557	40.57 ± 1.35	39.62 ± 1.46
cg00002660	SMARCC2;SMARCC2;SMARCC2	0.0023368	4.74 ± 0.45	5.53 ± 0.55	0.696458	5.53 ± 0.55	5.62 ± 0.6
cg18566672	SAMD4B	0.0023368	37.6 ± 2.25	39.47 ± 1.69	0.104017	39.47 ± 1.69	38.06 ± 1.35
cg18709545	VAX1;VAX1	0.0023452	17.27 ± 2.46	24.02 ± 2.14	0.415237	24.02 ± 2.14	22.41 ± 3.44
cg01314530	ATP13A5	0.0023455	89.97 ± 1.29	93.9 ± 1.08	0.0582372	93.9 ± 1.08	91.97 ± 1.2
cg22802012	Intergenic	0.0023465	94.14 ± 0.89	93.3 ± 0.88	0.0090246	93.3 ± 0.88	95.15 ± 0.85
cg17345050	AEBP2;AEBP2	0.0023469	4.51 ± 0.78	5.64 ± 0.86	0.980642	5.64 ± 0.86	5.65 ± 0.8
cg19658834	SATB2;SATB2;SATB2	0.0023474	91.7 ± 0.76	92.54 ± 0.51	0.187107	92.54 ± 0.51	91.73 ± 0.95
cg05876972	Intergenic	0.0023503	41.55 ± 1.2	43.73 ± 1.17	0.227786	43.73 ± 1.17	42.37 ± 1.54
cg22275985	STARD13	0.0023505	86.95 ± 0.8	87.63 ± 0.95	0.349011	87.63 ± 0.95	86.85 ± 1.31
cg06965590	Intergenic	0.0023522	61.09 ± 1.11	62.54 ± 1.08	0.109148	62.54 ± 1.08	60.92 ± 2.71
cg08519385	HAS1	0.0023537	7.97 ± 1.8	9.9 ± 1.94	0.624697	9.9 ± 1.94	10.49 ± 1.45
cg12953705	ICAM5	0.0023537	6.45 ± 0.76	7.26 ± 1.05	0.0131509	7.26 ± 1.05	6.26 ± 1.15
cg06162185	Intergenic	0.0023556	4.56 ± 0.84	6.21 ± 0.91	0.115026	6.21 ± 0.91	5.14 ± 1.4
cg13726504	Intergenic	0.0023561	71.76 ± 0.84	74.91 ± 1.11	0.483199	74.91 ± 1.11	75.54 ± 2.31
cg09048129	USP2;USP2	0.0023577	12.66 ± 3.29	15.6 ± 3.54	0.232464	15.6 ± 3.54	14.01 ± 3.65
cg17526311	HIPK2;HIPK2	0.0023582	6.77 ± 0.72	8.47 ± 0.78	0.706626	8.47 ± 0.78	8.25 ± 0.75
cg00595212	GNAL;GNAL;GNAL	0.0023587	13.55 ± 3.79	10.09 ± 3.55	0.0215928	10.09 ± 3.55	14.17 ± 3.68
cg23309924	RGS4;RGS4;RGS4	0.0023589	91.51 ± 1.02	94.91 ± 1.3	0.610889	94.91 ± 1.3	94.67 ± 1.13
cg02662840	TLCD1;TLCD1	0.0023602	6.62 ± 0.88	5.11 ± 0.4	0.237877	5.11 ± 0.4	6 ± 1.64
cg25935979	PIWIL4	0.002361	87.21 ± 2.81	90.91 ± 0.93	0.450298	90.91 ± 0.93	89.85 ± 2.64
cg05327255	ASCC3;ASCC3	0.002362	84.29 ± 2.25	86.09 ± 2.01	0.394198	86.09 ± 2.01	85.46 ± 2.56
cg20174256	ADD1;ADD1;ADD1;ADD1;ADD1	0.0023632	10.6 ± 1.64	12.21 ± 1.91	0.16365	12.21 ± 1.91	10.62 ± 1.26
cg06469610	Intergenic	0.0023633	94.13 ± 0.84	92.29 ± 0.65	0.153437	92.29 ± 0.65	93.32 ± 1
cg11955717	Intergenic	0.0023638	57.74 ± 7.02	63.86 ± 7.76	0.454557	63.86 ± 7.76	65.57 ± 6.3
cg24634058	SEL1L3;SEL1L3;SEL1L3	0.002366	95.91 ± 0.81	96.71 ± 0.68	0.706967	96.71 ± 0.68	96.83 ± 1.27
cg12043511	FRZB	0.0023669	83.67 ± 4.77	88.89 ± 3.21	0.754297	88.89 ± 3.21	88.51 ± 2.01
cg09896650	MIR1268A;MATK	0.0023688	47.52 ± 1.81	49.05 ± 1.61	0.249599	49.05 ± 1.61	47.78 ± 2.34
cg16106062	Intergenic	0.0023693	84.75 ± 3.42	87.13 ± 2.81	0.580105	87.13 ± 2.81	86.17 ± 2.23
cg16406345	GOT2	0.0023697	6.83 ± 0.77	5.87 ± 0.67	0.136526	5.87 ± 0.67	6.46 ± 0.81
cg20184469	CC2D2A;CC2D2A;CC2D2A	0.002372	4.82 ± 0.66	4.19 ± 0.54	0.659189	4.19 ± 0.54	4.36 ± 0.44
cg23533419	Intergenic	0.0023733	22.43 ± 1.27	23.95 ± 1.85	0.382097	23.95 ± 1.85	23.29 ± 1.6
cg09069593	GPR114	0.0023734	63.2 ± 1.27	65.94 ± 1.15	0.82892	65.94 ± 1.15	66.17 ± 2.06
cg18400808	RPS24	0.0023738	87.37 ± 0.78	90.63 ± 1.22	0.749727	90.63 ± 1.22	90.62 ± 3.16
cg09795310	SUSD5	0.0023771	92.94 ± 0.87	94.37 ± 0.92	0.349845	94.37 ± 0.92	93.92 ± 0.96
cg09180702	PIGQ;PIGQ	0.0023775	31.62 ± 1.97	28.85 ± 2.36	0.050169	28.85 ± 2.36	30.21 ± 2.21
cg15880065	Intergenic	0.0023855	94.27 ± 1.19	92.46 ± 1.48	0.775924	92.46 ± 1.48	92.55 ± 1.8
cg12829524	THSD7A	0.0023858	82.45 ± 4.17	88.11 ± 4.49	0.930944	88.11 ± 4.49	87.88 ± 3.36
cg22134923	AHNAK;AHNAK	0.0023859	94.34 ± 1.65	96.86 ± 1	0.0543409	96.86 ± 1	94.8 ± 1.3
cg08068630	Intergenic	0.0023862	93.25 ± 1.34	94.69 ± 0.6	0.842179	94.69 ± 0.6	94.71 ± 1.18
cg04181861	Intergenic	0.0023887	90.46 ± 0.84	92.16 ± 0.6	0.411687	92.16 ± 0.6	92.47 ± 0.72
cg04617575	LDB2;LDB2;LDB2;LDB2	0.0023892	31.23 ± 2.82	36.1 ± 2.86	0.0891284	36.1 ± 2.86	32.9 ± 1.48
cg17979485	Intergenic	0.0023894	4.51 ± 0.92	3.51 ± 0.9	0.187669	3.51 ± 0.9	4.08 ± 0.47
cg17384114	RBM15B	0.0023901	3.73 ± 0.57	4.86 ± 0.69	0.653558	4.86 ± 0.69	5.16 ± 0.97
cg22943982	IRF2	0.0023904	4.55 ± 0.52	3.64 ± 0.27	0.164808	3.64 ± 0.27	4.11 ± 0.55
cg20251241	TOX4	0.0023905	82.08 ± 1.93	80.51 ± 1.63	0.0296598	80.51 ± 1.63	81.66 ± 1.66
cg26247295	LRPAP1	0.0023907	91.85 ± 0.96	93.25 ± 0.72	0.806509	93.25 ± 0.72	93.33 ± 1.32
cg05125838	UCN2;COL7A1	0.0023918	75.86 ± 2	78.59 ± 1.35	0.529134	78.59 ± 1.35	78.13 ± 1.47
cg07830644	ATP6V0E1	0.002392	89.23 ± 0.95	91.74 ± 1.35	0.45491	91.74 ± 1.35	91.46 ± 0.58
cg18803039	CMAHP;CMAHP	0.0023923	80.8 ± 2.17	83.31 ± 1.48	0.618929	83.31 ± 1.48	82.95 ± 1.92
cg19792316	ZNF776;ZNF776	0.0023926	4 ± 0.59	2.91 ± 0.59	0.53908	2.91 ± 0.59	3.18 ± 0.93
cg01140661	Intergenic	0.0023947	4.05 ± 0.37	3.73 ± 0.41	0.382234	3.73 ± 0.41	3.46 ± 0.4
cg25042284	Intergenic	0.0023969	93.08 ± 0.95	90.76 ± 1.38	0.146969	90.76 ± 1.38	92.29 ± 1.49
cg27479937	TMEM106B;TMEM106B	0.0023973	5.38 ± 0.85	4.37 ± 0.89	0.629245	4.37 ± 0.89	4.57 ± 0.85
cg01942372	LIMS1	0.0023982	94.19 ± 0.67	92.9 ± 0.88	0.004273	92.9 ± 0.88	94.74 ± 1.09
cg16989764	BCYRN1	0.0023986	83.3 ± 1.7	81.4 ± 1.38	0.14262	81.4 ± 1.38	83.7 ± 2.86
cg01044662	C2orf3	0.0023989	47.65 ± 1.86	49.68 ± 2.14	0.0995804	49.68 ± 2.14	48.6 ± 2.75
cg17463149	PKP1;PKP1	0.0023989	4.92 ± 0.3	5.57 ± 0.35	0.991633	5.57 ± 0.35	5.6 ± 0.77
cg04344917	KIF11	0.0024027	4.56 ± 0.94	5.33 ± 1.01	0.267733	5.33 ± 1.01	4.74 ± 0.61
cg15405832	Intergenic	0.0024035	84.76 ± 0.79	82.45 ± 1.25	0.0649919	82.45 ± 1.25	84 ± 1.65
cg02092059	Intergenic	0.0024055	50.32 ± 1.46	51.87 ± 1.12	0.0826995	51.87 ± 1.12	51.43 ± 1.25
cg14435498	Intergenic	0.0024068	91.14 ± 1.09	88.96 ± 0.86	0.0218671	88.96 ± 0.86	90.58 ± 1.34
cg17693374	PCDHGA4;PCDHGA2;PCDHGB2;PCDHGA1;PCDHGB1;PCDHGA3;PCDHGB2	0.0024086	5.52 ± 0.62	4.16 ± 0.41	0.107315	4.16 ± 0.41	4.72 ± 0.5
cg26883351	PRRG1;PRRG1	0.0024099	3.54 ± 0.37	2.71 ± 0.42	0.152201	2.71 ± 0.42	3.16 ± 0.3
cg22305850	Intergenic	0.0024106	70.36 ± 1.26	71.85 ± 1.17	0.0309835	71.85 ± 1.17	70.01 ± 0.93
cg20360785	PTGS1;PTGS1;PTGS1;PTGS1;PTGS1;PTGS1;PTGS1	0.0024137	5.41 ± 0.2	6.97 ± 0.91	0.323753	6.97 ± 0.91	6.26 ± 1.25
cg20540306	GALNT10;GALNT10	0.0024181	86.51 ± 2.34	80.94 ± 2.6	0.898392	80.94 ± 2.6	80.55 ± 3.75
cg07256007	TTC29;TTC29	0.0024204	51.66 ± 1.51	54.35 ± 1.33	0.025229	54.35 ± 1.33	53.05 ± 0.74
cg06076692	ATXN1;ATXN1	0.0024223	93.63 ± 0.9	95.21 ± 0.77	0.234752	95.21 ± 0.77	94.15 ± 1.84
cg17074112	ASAP1;ASAP1	0.0024232	87.8 ± 2.69	89.49 ± 2.49	0.988268	89.49 ± 2.49	89.53 ± 2.01
cg19821536	OR6B3	0.0024258	10.44 ± 1.36	12.18 ± 1.66	0.0578862	12.18 ± 1.66	9.92 ± 1.04
cg21305619	RELN;RELN	0.0024289	77.73 ± 0.53	75.59 ± 0.87	0.173645	75.59 ± 0.87	76.36 ± 1.56
cg27556194	MUT;MUT	0.0024316	93.52 ± 0.89	94.82 ± 0.45	0.21097	94.82 ± 0.45	94.21 ± 0.73
cg26977644	ODZ4	0.0024327	7.24 ± 1.29	5.75 ± 0.72	0.0520934	5.75 ± 0.72	7.06 ± 1.55
cg17468358	Intergenic	0.0024328	45.37 ± 3.37	49.94 ± 2.86	0.822984	49.94 ± 2.86	49.7 ± 2.08
cg12510264	Intergenic	0.0024344	88.87 ± 1.66	86.87 ± 1.62	0.0674613	86.87 ± 1.62	89.03 ± 2
cg03764702	Intergenic	0.002435	85.92 ± 2.38	88.67 ± 1.9	0.705981	88.67 ± 1.9	88.32 ± 1.89
cg23358544	Intergenic	0.0024351	35.03 ± 1.13	37.01 ± 0.69	0.0135151	37.01 ± 0.69	35.33 ± 1.06
cg09459561	Intergenic	0.0024353	3.74 ± 0.7	4.14 ± 0.75	0.461487	4.14 ± 0.75	4.39 ± 0.54
cg07283015	HRH4;HRH4;HRH4	0.0024358	73.48 ± 1.98	76.1 ± 1.19	0.022441	76.1 ± 1.19	74.45 ± 1.38
cg11132913	Intergenic	0.0024362	91.78 ± 1.53	93.83 ± 1.18	0.471698	93.83 ± 1.18	93.19 ± 1.23
cg18030587	Intergenic	0.0024385	7.49 ± 0.72	8.73 ± 1.06	0.103443	8.73 ± 1.06	7.33 ± 0.83
cg23036668	Intergenic	0.0024385	12.5 ± 2.95	10.8 ± 2.78	0.5093	10.8 ± 2.78	11.47 ± 0.95
cg25157810	Intergenic	0.0024393	39.41 ± 2.11	41.29 ± 2.41	0.0284871	41.29 ± 2.41	39.68 ± 3.17
cg10667418	Intergenic	0.0024402	3.47 ± 0.39	3.21 ± 0.35	0.370563	3.21 ± 0.35	3.4 ± 0.34
cg00249511	SCT;SCT	0.0024417	6.65 ± 1.6	7.43 ± 1.82	0.816433	7.43 ± 1.82	7.52 ± 1.67
cg08982904	Intergenic	0.0024458	7.89 ± 0.86	6.52 ± 1.06	0.145527	6.52 ± 1.06	7.48 ± 1.06
cg19921170	BCAS2	0.0024507	4.24 ± 0.77	5.32 ± 0.71	0.0283277	5.32 ± 0.71	6.53 ± 1.16
cg01701183	Intergenic	0.0024512	3.57 ± 0.63	2.65 ± 0.31	0.895838	2.65 ± 0.31	2.67 ± 0.3
cg09552517	SIN3A	0.0024515	10.61 ± 1.69	8.21 ± 1.14	0.0337457	8.21 ± 1.14	9.39 ± 0.95
cg05855588	KL	0.0024538	9.05 ± 1.72	6.77 ± 0.82	0.123871	6.77 ± 0.82	7.63 ± 0.69
cg10272922	ABCC4	0.0024538	88.45 ± 2	90.64 ± 1.96	0.0359132	90.64 ± 1.96	88.16 ± 1.13
cg11394547	Intergenic	0.0024551	94.88 ± 0.87	96.74 ± 0.64	0.198222	96.74 ± 0.64	95.93 ± 1.07
cg16563230	AJAP1;AJAP1	0.0024559	4.48 ± 0.65	5.12 ± 0.53	0.736231	5.12 ± 0.53	5.31 ± 0.76
cg17731568	SLC25A48	0.0024562	54.86 ± 0.89	56.29 ± 1.29	0.133004	56.29 ± 1.29	55.22 ± 1.42
cg02014003	NOVA1;NOVA1;NOVA1	0.0024566	5.31 ± 0.57	4.06 ± 0.41	0.296283	4.06 ± 0.41	4.46 ± 0.57
cg25261191	CUX1;CUX1;CUX1	0.0024566	86.08 ± 1.4	88.57 ± 1.02	0.0097199	88.57 ± 1.02	86.29 ± 1.04
cg27186318	TTC6	0.0024569	13.82 ± 2.91	17.51 ± 2.54	0.0198282	17.51 ± 2.54	13.66 ± 4.13
cg02968429	NR2F2;NR2F2	0.0024596	4.23 ± 0.5	5.39 ± 0.64	0.0216046	5.39 ± 0.64	4.39 ± 0.43
cg12507643	Intergenic	0.0024602	24.47 ± 1.56	27.48 ± 1.96	0.0655232	27.48 ± 1.96	24.76 ± 1.77
cg17129519	C6orf136;C6orf136;C6orf136	0.0024618	91.44 ± 1.67	94.48 ± 1.28	0.0738017	94.48 ± 1.28	92.28 ± 2.31
cg10782295	Intergenic	0.0024626	86.57 ± 1.59	87.96 ± 1.34	0.45078	87.96 ± 1.34	87.42 ± 0.82
cg05037299	Intergenic	0.002463	89.19 ± 0.82	91.03 ± 1.21	0.0017393	91.03 ± 1.21	89.18 ± 1.81
cg16646539	KLHL8	0.0024649	7.28 ± 0.85	5.16 ± 0.91	0.0391912	5.16 ± 0.91	6.53 ± 0.67
cg11948367	Intergenic	0.0024665	20.97 ± 4.02	25.12 ± 3.71	0.0021654	25.12 ± 3.71	21.43 ± 3.1
cg00054692	C7orf30	0.0024688	4.86 ± 0.83	4.15 ± 0.7	0.237542	4.15 ± 0.7	4.76 ± 1.08
cg05574313	DCHS2	0.0024766	12.86 ± 4.07	19.08 ± 3.87	0.0979174	19.08 ± 3.87	15.36 ± 4.89
cg13933370	Intergenic	0.0024784	89.86 ± 2	92.88 ± 1.52	0.485315	92.88 ± 1.52	91.72 ± 2.53
cg02967428	Intergenic	0.0024789	6.19 ± 1.92	8.01 ± 1.89	0.733081	8.01 ± 1.89	8.31 ± 1.73
cg15976883	Intergenic	0.002479	90.91 ± 0.91	88.34 ± 1.32	0.499195	88.34 ± 1.32	89.1 ± 2.07
cg22109930	MIR200B	0.0024796	22.6 ± 1.48	24.36 ± 1.44	0.527216	24.36 ± 1.44	23.85 ± 3.04
cg12305798	C2orf84	0.0024814	68.8 ± 1.87	67.08 ± 1.93	0.154975	67.08 ± 1.93	65.46 ± 2.73
cg04511463	Intergenic	0.0024832	83.01 ± 2.01	87.26 ± 1.93	0.0063996	87.26 ± 1.93	83.1 ± 2.07
cg22456809	FGB;FGB	0.0024853	72.09 ± 3.45	75.74 ± 2.1	0.993877	75.74 ± 2.1	75.55 ± 4.72
cg07442905	GAS8;GAS8;GAS8;GAS8;URAHP	0.0024877	93.42 ± 0.81	94.45 ± 0.47	0.171521	94.45 ± 0.47	94.88 ± 0.81
cg01079363	Intergenic	0.0024882	86.28 ± 0.78	88.53 ± 1.05	0.396434	88.53 ± 1.05	87.67 ± 1.25
cg02678476	Intergenic	0.0024893	42.91 ± 3.94	45.14 ± 4.05	0.113764	45.14 ± 4.05	43.34 ± 3.47
cg16130975	SFXN4;SFXN4	0.002492	11.28 ± 1.51	14.23 ± 2.28	0.995606	14.23 ± 2.28	14.17 ± 1.7
cg11986385	NAV2	0.0024922	47.24 ± 2.28	50.66 ± 2.05	0.583928	50.66 ± 2.05	50 ± 1.77
cg20111163	ANKRD45;LOC730159	0.0024972	38.14 ± 5.59	45.6 ± 4.63	0.27466	45.6 ± 4.63	40.36 ± 7.34
cg16211328	LOC400927	0.0024979	4.68 ± 0.92	3.82 ± 0.87	0.554862	3.82 ± 0.87	4.01 ± 0.82
cg09520791	LOC100507391	0.0025016	9.66 ± 2.96	12 ± 2.74	0.46143	12 ± 2.74	11.52 ± 3.25
cg05754688	ARID3B	0.0025045	5.97 ± 0.67	6.89 ± 0.81	0.125859	6.89 ± 0.81	5.99 ± 0.53
cg20455157	WIPF1	0.0025063	13.32 ± 1.11	14.86 ± 0.74	0.0180541	14.86 ± 0.74	12.74 ± 1.28
cg15089567	MAD1L1;MAD1L1;MAD1L1	0.0025097	85.5 ± 1.01	88.17 ± 0.83	0.221129	88.17 ± 0.83	89.3 ± 2.06
cg00433917	EVI5L;EVI5L	0.0025099	65.97 ± 2.04	63.26 ± 1.97	0.0459147	63.26 ± 1.97	64.76 ± 2.52
cg04564003	Intergenic	0.0025106	56.13 ± 2.01	58.79 ± 1.69	0.2495	58.79 ± 1.69	58.12 ± 1.19
cg16717243	Intergenic	0.0025121	89.7 ± 1.56	86.44 ± 1.56	0.713746	86.44 ± 1.56	86.84 ± 2.02
cg19212576	Intergenic	0.0025124	5.63 ± 1.21	6.72 ± 1.52	0.762425	6.72 ± 1.52	6.35 ± 0.93
cg05981912	Intergenic	0.002513	6.88 ± 1.52	4.39 ± 0.81	0.422828	4.39 ± 0.81	4.92 ± 1.38
cg11065632	FAP;FAP;FAP;FAP	0.0025135	89.82 ± 2.5	91.72 ± 2.55	0.733094	91.72 ± 2.55	92.2 ± 2
cg02992645	OVGP1	0.0025161	86.46 ± 0.91	84.48 ± 1.14	0.174029	84.48 ± 1.14	85.15 ± 1.23
cg23547656	PTPRJ	0.0025165	47.76 ± 1.96	49.47 ± 1.72	0.125474	49.47 ± 1.72	47.89 ± 1.45
cg22606941	GALNT9	0.0025171	59.89 ± 1.13	60.86 ± 1.32	0.165579	60.86 ± 1.32	59.7 ± 1.34
cg06283673	CORO6	0.0025201	5.15 ± 0.65	3.98 ± 0.57	0.473795	3.98 ± 0.57	3.75 ± 1.24
cg15535798	CTDSPL2;CTDSPL2	0.0025201	79.05 ± 1.48	81.72 ± 0.85	0.0818364	81.72 ± 0.85	79.71 ± 2.09
cg15372842	Intergenic	0.0025204	52.19 ± 1.06	54.75 ± 0.82	0.442053	54.75 ± 0.82	53.83 ± 3.25
cg11453336	Intergenic	0.0025227	91.2 ± 0.83	88.52 ± 1.55	0.222384	88.52 ± 1.55	89.92 ± 1.58
cg01400712	EFR3B	0.0025233	57.41 ± 3.67	59.01 ± 3.01	0.507637	59.01 ± 3.01	60.07 ± 5.48
cg07628000	Intergenic	0.0025258	86.45 ± 0.85	88.5 ± 1.1	0.166346	88.5 ± 1.1	86.99 ± 1.53
cg23699239	FLJ39582;THAP7;FLJ39582;THAP7	0.0025267	7.2 ± 0.79	5.17 ± 1.01	0.181043	5.17 ± 1.01	6.67 ± 1.5
cg16746770	PTPRO;PTPRO	0.0025277	11.43 ± 2.78	15.49 ± 2.52	0.161753	15.49 ± 2.52	13.21 ± 2.05
cg22079008	Intergenic	0.0025289	95.73 ± 1.08	95.06 ± 1.14	0.388282	95.06 ± 1.14	95.71 ± 0.74
cg14638588	Intergenic	0.0025315	91.58 ± 1.03	89.37 ± 1.17	0.27649	89.37 ± 1.17	90.52 ± 1.65
cg06269962	Intergenic	0.0025339	5.67 ± 0.63	7.39 ± 0.95	0.47273	7.39 ± 0.95	6.79 ± 1.07
cg16987101	Intergenic	0.0025347	4.19 ± 0.22	5 ± 0.52	0.568423	5 ± 0.52	4.86 ± 0.44
cg03367413	Intergenic	0.0025367	29.6 ± 3.82	32.49 ± 5.05	0.0027172	32.49 ± 5.05	28.02 ± 5.18
cg11945895	GPR180	0.0025383	57.2 ± 2.8	59.8 ± 3.28	0.223724	59.8 ± 3.28	58.49 ± 3.07
cg26434487	RABGAP1L;RABGAP1L	0.0025391	91.96 ± 1.77	94.68 ± 1.06	0.522806	94.68 ± 1.06	93.99 ± 1.44
cg18119299	TPK1;TPK1	0.0025395	3.87 ± 0.67	3.35 ± 0.47	0.526338	3.35 ± 0.47	3.6 ± 0.54
cg05197323	SDR39U1	0.0025405	4.27 ± 0.72	5.3 ± 1.07	0.381299	5.3 ± 1.07	4.67 ± 0.7
cg04759376	Intergenic	0.0025443	91.55 ± 0.77	93.38 ± 1.11	0.702645	93.38 ± 1.11	93.03 ± 1.61
cg07311889	DNALI1	0.0025468	86.57 ± 3.06	90.39 ± 2.44	0.916338	90.39 ± 2.44	90.24 ± 2.45
cg24878631	DLGAP1;DLGAP1;DLGAP1;DLGAP1;DLGAP1;DLGAP1;DLGAP1;DLGAP1;DLGAP1	0.0025472	3.88 ± 0.69	4.83 ± 0.84	0.598978	4.83 ± 0.84	4.63 ± 0.79
cg20202246	Intergenic	0.0025478	56.2 ± 1.86	54.26 ± 1.9	0.896212	54.26 ± 1.9	54.36 ± 1.09
cg21341592	TNFRSF1A	0.002548	59.95 ± 5.9	61.93 ± 5.85	0.0506784	61.93 ± 5.85	60.61 ± 5.88
cg07396092	BTBD12	0.0025502	9.17 ± 1.7	12.81 ± 1.42	0.693168	12.81 ± 1.42	12.34 ± 1.76
cg01394339	KHDC1	0.0025535	29.95 ± 5.81	21.74 ± 4.6	0.0830729	21.74 ± 4.6	26.17 ± 3.56
cg13205848	ANO2	0.0025539	4.56 ± 1.24	5.44 ± 1.56	0.353271	5.44 ± 1.56	4.72 ± 0.29
cg24923516	CYP27C1	0.0025556	8.22 ± 0.62	6.67 ± 0.7	0.199603	6.67 ± 0.7	5.84 ± 1.24
cg08651153	TRIM2;TRIM2;TRIM2;TRIM2;TRIM2	0.0025563	85.24 ± 2.77	91.09 ± 2	0.153943	91.09 ± 2	89.71 ± 2.96
cg23740854	Intergenic	0.0025573	19.5 ± 1.33	18.58 ± 1.31	0.280106	18.58 ± 1.31	19.29 ± 1.05
cg00412526	Intergenic	0.0025593	86.91 ± 1.7	89.46 ± 1.72	0.0960564	89.46 ± 1.72	88.08 ± 1.76
cg01287209	FAM171B	0.0025618	90.81 ± 1.14	92.39 ± 0.44	0.558763	92.39 ± 0.44	92.01 ± 1.15
cg22742344	CLSTN3;RBP5	0.002565	3.94 ± 0.53	3.36 ± 0.36	0.754164	3.36 ± 0.36	3.48 ± 0.58
cg19170909	Intergenic	0.0025656	12.04 ± 2.09	16.52 ± 2.95	0.0599677	16.52 ± 2.95	13.26 ± 2.55
cg16811129	ARHGEF10	0.0025666	43.27 ± 3.95	38.14 ± 3.5	0.381834	38.14 ± 3.5	40.33 ± 3.72
cg05413187	ZNF883;ZNF883	0.0025669	5.57 ± 0.75	4.99 ± 0.59	0.635772	4.99 ± 0.59	5.11 ± 0.46
cg25803632	HECW1	0.0025669	5.99 ± 1.13	4.32 ± 0.58	0.30348	4.32 ± 0.58	4.77 ± 0.79
cg15809694	KCNH2;KCNH2	0.002568	3.17 ± 0.58	4.5 ± 0.7	0.028714	4.5 ± 0.7	3.53 ± 0.75
cg20040140	TCF20;TCF20	0.0025686	4.76 ± 0.16	4.36 ± 0.26	0.784064	4.36 ± 0.26	4.5 ± 0.73
cg11307854	Intergenic	0.0025709	63.69 ± 3.55	65.12 ± 3.18	0.509676	65.12 ± 3.18	64.56 ± 2.2
cg05082708	Intergenic	0.0025717	38.43 ± 1.14	39.84 ± 1.36	0.0275684	39.84 ± 1.36	38.65 ± 1.38
cg25486310	PCGF6;PCGF6	0.0025765	39.65 ± 1.98	41.46 ± 2.59	0.002641	41.46 ± 2.59	38.06 ± 2.21
cg21816977	HDAC9	0.0025772	91.05 ± 2.02	94.44 ± 1.2	0.591242	94.44 ± 1.2	93.66 ± 2.11
cg02204837	Intergenic	0.0025774	8.58 ± 1.27	11.38 ± 1.58	0.200256	11.38 ± 1.58	9.62 ± 1.61
cg01005905	Intergenic	0.0025779	90.57 ± 1	88.79 ± 1.37	0.404422	88.79 ± 1.37	89.78 ± 1.75
cg04747678	MARK4	0.002579	82.42 ± 1.29	81.02 ± 1.18	0.42296	81.02 ± 1.18	80.38 ± 2.27
cg00327072	NEURL1B	0.0025816	95.98 ± 0.34	94.98 ± 0.42	0.63014	94.98 ± 0.42	95.12 ± 0.6
cg11708899	Intergenic	0.0025829	56.6 ± 6.1	54.4 ± 5.68	0.754135	54.4 ± 5.68	55.33 ± 4.28
cg26577326	LOC100287225	0.0025835	10.4 ± 2.15	13.1 ± 2.06	0.103005	13.1 ± 2.06	10.77 ± 1.86
cg25550878	FNIP1;FNIP1	0.0025839	5.3 ± 0.39	4.39 ± 0.53	0.467681	4.39 ± 0.53	4.78 ± 0.87
cg13108141	UBE2H;UBE2H	0.0025846	40.58 ± 1.92	43.63 ± 1.52	0.0780334	43.63 ± 1.52	42.09 ± 2.22
cg17335053	VANGL2	0.0025876	58.57 ± 1.97	60.75 ± 2.16	0.51719	60.75 ± 2.16	60.02 ± 0.99
cg27084825	Intergenic	0.002588	68.69 ± 3.97	74.08 ± 2.78	0.684645	74.08 ± 2.78	72.87 ± 4.35
cg14752720	NTN4	0.0025888	87.35 ± 2.22	85 ± 2.18	0.754814	85 ± 2.18	84.62 ± 3.17
cg06265429	Intergenic	0.0025895	89.84 ± 2.06	91.36 ± 2.07	0.898222	91.36 ± 2.07	91.61 ± 1.8
cg26859357	ST3GAL6;ST3GAL6;ST3GAL6;ST3GAL6;ST3GAL6;ST3GAL6	0.0025916	80.76 ± 3.34	83.69 ± 2.95	0.351355	83.69 ± 2.95	82.23 ± 3.08
cg05366052	APOBEC1	0.0025961	11.54 ± 1.15	14.87 ± 1.58	0.1681	14.87 ± 1.58	12.7 ± 2.71
cg24133547	Intergenic	0.0026008	4.14 ± 0.4	2.86 ± 0.53	0.0358019	2.86 ± 0.53	3.5 ± 0.12
cg24056006	C18orf63	0.0026033	81.9 ± 0.78	83.86 ± 0.49	0.851166	83.86 ± 0.49	83.92 ± 1.33
cg21070941	DNAJC14	0.0026056	55.42 ± 1.04	57.75 ± 0.75	0.342845	57.75 ± 0.75	57.28 ± 1.39
cg01278564	ZFPM1	0.0026069	85.19 ± 2.15	86.76 ± 2.26	0.4704	86.76 ± 2.26	85.72 ± 2.08
cg09308274	Intergenic	0.0026084	94.48 ± 0.65	95.81 ± 0.99	0.122949	95.81 ± 0.99	94.62 ± 1.41
cg12146763	Intergenic	0.0026109	6.26 ± 0.55	5.28 ± 0.51	0.093812	5.28 ± 0.51	6.39 ± 1.13
cg19466822	BCL11B;BCL11B	0.0026129	13.96 ± 3.17	18.07 ± 3.05	0.0432289	18.07 ± 3.05	11.94 ± 3.07
cg17454558	Intergenic	0.0026182	88.29 ± 2.98	91.72 ± 1.37	0.0106245	91.72 ± 1.37	89.44 ± 1.53
cg00754552	NAPSB	0.00262	89.13 ± 1.99	91.39 ± 1.85	0.0839963	91.39 ± 1.85	88.91 ± 3.26
cg26896768	VAMP2;VAMP2	0.0026204	5.04 ± 0.37	5.67 ± 0.3	0.470291	5.67 ± 0.3	5.46 ± 0.57
cg18883852	LOC100190939	0.0026244	92.3 ± 0.73	94.43 ± 0.73	0.14042	94.43 ± 0.73	92.33 ± 2.17
cg13575625	Intergenic	0.0026268	87.19 ± 2	90.31 ± 1.49	0.901251	90.31 ± 1.49	89.8 ± 3.77
cg10645377	ATP6AP1	0.002627	92.13 ± 1.57	90.08 ± 1.86	0.287335	90.08 ± 1.86	91.5 ± 1.76
cg21659774	C18orf8	0.0026278	5.99 ± 0.7	4.66 ± 0.72	0.264148	4.66 ± 0.72	4.4 ± 0.55
cg20746797	Intergenic	0.0026284	87.4 ± 2.64	89.77 ± 2.24	0.125723	89.77 ± 2.24	87.96 ± 1.89
cg04335449	RUVBL1	0.0026288	3.43 ± 0.3	2.82 ± 0.11	0.0066867	2.82 ± 0.11	3.64 ± 0.51
cg07894717	APITD1;CORT	0.0026292	89.56 ± 1.34	91.51 ± 1.1	0.353818	91.51 ± 1.1	90.6 ± 1.79
cg25556048	Intergenic	0.0026312	90.49 ± 1.62	88.03 ± 1.62	0.0134546	88.03 ± 1.62	90.13 ± 2.39
cg24529771	KCNMB3;KCNMB3;KCNMB3;KCNMB3	0.0026334	31.42 ± 2.86	28.67 ± 2.48	0.351928	28.67 ± 2.48	29.98 ± 2.34
cg05657618	NGEF;NGEF;NGEF	0.0026354	4.19 ± 0.36	3.57 ± 0.39	0.27709	3.57 ± 0.39	3.74 ± 0.5
cg00974944	PTPRG	0.0026392	91.76 ± 0.54	88.95 ± 1.54	0.111058	88.95 ± 1.54	90.65 ± 1.67
cg14548898	KRT74	0.0026408	44.19 ± 2.25	48.14 ± 2.7	0.000369	48.14 ± 2.7	45.43 ± 3.21
cg11787167	NPAS3;NPAS3;NPAS3;NPAS3	0.0026412	37.36 ± 4.95	39.02 ± 5.23	0.621044	39.02 ± 5.23	38.69 ± 5.88
cg18131045	LOC643201	0.0026419	83.3 ± 1.99	81.49 ± 1.93	0.861039	81.49 ± 1.93	81.66 ± 1.34
cg10021032	Intergenic	0.0026464	92.55 ± 0.75	91.39 ± 0.85	0.767196	91.39 ± 0.85	91.57 ± 1.46
cg08518551	AMPD2;AMPD2;AMPD2	0.0026467	44.03 ± 3.55	46.7 ± 2.78	0.233082	46.7 ± 2.78	45.68 ± 3.08
cg04869787	Intergenic	0.0026509	55.39 ± 1.51	56.77 ± 1.46	0.36913	56.77 ± 1.46	56.09 ± 1.77
cg10829799	LRRC29;LRRC29	0.0026514	60.47 ± 1.21	62.42 ± 1.12	0.280938	62.42 ± 1.12	61.8 ± 1
cg14530963	Intergenic	0.0026522	72.31 ± 1.21	75.53 ± 0.8	0.168968	75.53 ± 0.8	74.81 ± 0.96
cg22307152	Intergenic	0.002653	96.94 ± 0.94	97.48 ± 0.63	0.462456	97.48 ± 0.63	97.14 ± 0.6
cg27609721	SNTB2	0.0026547	86.81 ± 1.18	88.32 ± 1.04	0.794987	88.32 ± 1.04	88.43 ± 1.14
cg00646615	Intergenic	0.0026551	55.41 ± 4.02	59.51 ± 3.5	0.0167847	59.51 ± 3.5	52.98 ± 5.01
cg22702056	NCOR2;NCOR2	0.0026555	94.69 ± 0.98	96.05 ± 0.74	0.297898	96.05 ± 0.74	95.29 ± 1.09
cg12107626	KLHL10;NT5C3L	0.0026571	7.53 ± 0.52	6.51 ± 0.54	0.197275	6.51 ± 0.54	6.17 ± 0.61
cg13882486	LPAR1;LPAR1	0.0026607	6.22 ± 0.28	5.21 ± 0.38	0.106818	5.21 ± 0.38	5.74 ± 0.5
cg05044134	VWA3B	0.0026609	6.68 ± 0.57	5.56 ± 0.89	0.207776	5.56 ± 0.89	6.48 ± 1.31
cg07754938	PRKAR2A	0.0026611	5.75 ± 0.6	4.46 ± 0.73	0.8735	4.46 ± 0.73	4.53 ± 0.67
cg05970307	KIAA1191;KIAA1191;KIAA1191	0.0026616	74.15 ± 2.88	76.59 ± 3.08	0.776041	76.59 ± 3.08	76.29 ± 1.39
cg09747638	RP1L1	0.0026617	25.59 ± 2.99	23.61 ± 2.43	0.168314	23.61 ± 2.43	25.33 ± 4.51
cg14983529	MECOM;MECOM	0.0026634	40.04 ± 2.88	42.61 ± 3.27	0.769057	42.61 ± 3.27	41.97 ± 3.35
cg26605809	TPO;TPO;TPO;TPO	0.002664	50.82 ± 1.41	53.28 ± 0.77	0.0075443	53.28 ± 0.77	51.65 ± 1.14
cg22181540	RUFY3;RUFY3;RUFY3;RUFY3;RUFY3	0.0026687	85.6 ± 0.81	88.61 ± 1.09	0.0011109	88.61 ± 1.09	82.33 ± 1.47
cg22161115	UGT2B15	0.0026704	23.29 ± 6.62	26.44 ± 6.17	0.25487	26.44 ± 6.17	24.32 ± 5.14
cg02186963	RAD51B	0.0026723	26.44 ± 1.64	22.77 ± 1.69	0.435268	22.77 ± 1.69	23.82 ± 2.71
cg06723239	LOC101929023;LOC101929023	0.0026729	90.52 ± 2.06	92.36 ± 1.31	0.252051	92.36 ± 1.31	91.23 ± 2
cg25278347	MYL1	0.0026743	20.72 ± 2.07	23.41 ± 1.85	0.0067402	23.41 ± 1.85	21.75 ± 1.05
cg04338621	C17orf85;C17orf85	0.0026796	85.9 ± 2.45	91.87 ± 2.92	0.704166	91.87 ± 2.92	90.61 ± 3.35
cg18779570	EFHC2	0.0026827	69.03 ± 1.78	71.69 ± 1.52	0.156027	71.69 ± 1.52	69.7 ± 2.15
cg19720945	CCDC158	0.0026835	62.35 ± 1.16	64.84 ± 2.07	0.829221	64.84 ± 2.07	64.49 ± 2.3
cg18087791	B9D1;B9D1;B9D1;B9D1	0.0026836	3.44 ± 0.24	4.3 ± 0.37	0.0755279	4.3 ± 0.37	3.69 ± 0.58
cg13049096	DSG2-AS1	0.0026854	49.68 ± 3.44	52.8 ± 3.87	0.269754	52.8 ± 3.87	51.54 ± 5.66
cg02578753	ZGPAT;ZGPAT;ZGPAT;ZGPAT;ZGPAT	0.0026861	89.12 ± 3.66	94.09 ± 1.53	0.267447	94.09 ± 1.53	92.53 ± 2.38
cg05013129	NAB2	0.0026862	7.12 ± 1.35	5.78 ± 0.93	0.227702	5.78 ± 0.93	6.39 ± 1.02
cg12671634	Intergenic	0.0026874	92.67 ± 1.74	90.51 ± 1.84	0.739207	90.51 ± 1.84	91.02 ± 1
cg11254726	PIK3C2B	0.0026875	90.2 ± 1.14	92.61 ± 1.63	0.978758	92.61 ± 1.63	92.73 ± 0.7
cg04599652	PPP2CA	0.0026882	3.71 ± 0.62	2.88 ± 0.39	0.134744	2.88 ± 0.39	3.6 ± 0.85
cg13443953	NECAP1;NECAP1	0.0026916	3.96 ± 0.88	5.1 ± 0.86	0.314122	5.1 ± 0.86	4.87 ± 1.2
cg14750231	HORMAD1;HORMAD1	0.0026919	68.46 ± 3.68	75.27 ± 2.55	0.207561	75.27 ± 2.55	73.1 ± 3.78
cg16693870	ATG2B	0.0026938	83.19 ± 2.32	86.97 ± 1.41	0.0320269	86.97 ± 1.41	84.26 ± 1.1
cg09501590	Intergenic	0.0026967	91.79 ± 0.64	94.24 ± 1.12	0.100961	94.24 ± 1.12	92.2 ± 2.18
cg04533024	Intergenic	0.0026975	51.05 ± 1.24	49.53 ± 0.97	0.913169	49.53 ± 0.97	49.6 ± 1.39
cg06741312	Intergenic	0.0026975	60.36 ± 2.66	62.35 ± 2.1	0.0240956	62.35 ± 2.1	60.41 ± 1.64
cg11864726	Intergenic	0.0026981	53.36 ± 1.99	55.71 ± 1.66	0.0562242	55.71 ± 1.66	53.33 ± 1.93
cg04530666	Intergenic	0.0026998	88.35 ± 2.65	92.04 ± 1.85	0.286459	92.04 ± 1.85	90.24 ± 2.54
cg19690267	VTI1A	0.0027023	92.57 ± 2.75	90.5 ± 2.81	0.161511	90.5 ± 2.81	91.93 ± 2.51
cg11276093	MYOF;MYOF	0.0027025	85.39 ± 1.67	87.56 ± 1.06	0.11651	87.56 ± 1.06	86.06 ± 1.31
cg17489870	AK4;AK4;AK4	0.0027033	7.02 ± 0.64	5.89 ± 0.56	0.0163347	5.89 ± 0.56	6.98 ± 0.68
cg08159989	KLHDC8A	0.0027056	76.69 ± 4.92	82.85 ± 2.43	0.181919	82.85 ± 2.43	81.23 ± 1.35
cg08974518	ALDH3A1;ALDH3A1	0.0027083	79.65 ± 2.28	81.54 ± 1.62	0.0605626	81.54 ± 1.62	82.81 ± 1.33
cg18663499	B4GALT4;B4GALT4	0.0027096	4.38 ± 0.72	5.03 ± 0.83	0.725383	5.03 ± 0.83	4.84 ± 0.61
cg15372479	MIR2110;C10orf118;C10orf118	0.0027103	5.94 ± 0.36	5.05 ± 0.41	0.645574	5.05 ± 0.41	5.35 ± 0.97
cg22012516	OXA1L	0.0027117	4.01 ± 0.85	2.92 ± 0.69	0.059666	2.92 ± 0.69	3.59 ± 0.65
cg25931138	SDHAP1	0.0027121	93.82 ± 0.55	91.33 ± 1.07	0.108485	91.33 ± 1.07	92.85 ± 1.01
cg12463558	Intergenic	0.0027125	54.2 ± 2.21	57.17 ± 1.24	0.284713	57.17 ± 1.24	56.22 ± 1.73
cg04578613	CADM4	0.0027138	85.01 ± 2.35	86.89 ± 1.5	0.396906	86.89 ± 1.5	87.31 ± 2.42
cg00358660	STK40	0.0027169	3.21 ± 0.3	2.61 ± 0.2	0.153489	2.61 ± 0.2	3.01 ± 0.43
cg10097840	Intergenic	0.0027197	39.17 ± 1.2	41.69 ± 1.07	0.0411504	41.69 ± 1.07	39.75 ± 2.06
cg18229092	Intergenic	0.0027215	20.99 ± 1.43	23.05 ± 0.75	0.735537	23.05 ± 0.75	22.63 ± 3.37
cg01902998	Intergenic	0.0027253	9.55 ± 1.47	12.91 ± 2.39	0.0226421	12.91 ± 2.39	9.23 ± 1.45
cg03744407	Intergenic	0.0027265	76.84 ± 0.8	78.8 ± 0.88	0.0889087	78.8 ± 0.88	76.96 ± 1.6
cg26691951	LOC101929268	0.0027268	34.68 ± 0.72	36.53 ± 0.94	0.0165946	36.53 ± 0.94	34.81 ± 1.51
cg02759846	CLEC11A	0.0027286	6.58 ± 0.91	7.23 ± 0.96	0.981796	7.23 ± 0.96	7.31 ± 1.46
cg06770179	Intergenic	0.002732	76.64 ± 2.35	78.47 ± 2.82	0.339329	78.47 ± 2.82	77.63 ± 2.59
cg21188017	C12orf51	0.0027346	96.59 ± 0.68	97.42 ± 0.54	0.163196	97.42 ± 0.54	97.05 ± 0.51
cg10505473	KCNMA1;KCNMA1;KCNMA1;KCNMA1;KCNMA1;KCNMA1	0.0027365	3.77 ± 0.43	2.98 ± 0.46	0.0188212	2.98 ± 0.46	3.61 ± 0.2
cg24838316	Intergenic	0.0027384	69.55 ± 3.5	71.05 ± 3.02	0.0301767	71.05 ± 3.02	69.6 ± 3.73
cg09330012	EHBP1;EHBP1;EHBP1;EHBP1	0.0027394	86.01 ± 1.86	90.44 ± 1.87	0.010381	90.44 ± 1.87	86.36 ± 1.28
cg06640533	CSNK2A2	0.0027415	73.73 ± 1.37	76.57 ± 0.73	0.354081	76.57 ± 0.73	75.33 ± 2.29
cg21807313	DOK3;DOK3;DOK3	0.0027438	56.71 ± 1.44	58.5 ± 1.5	0.37342	58.5 ± 1.5	57.43 ± 2.69
cg06236029	PPP1R1B;PPP1R1B	0.0027456	7.84 ± 0.67	9.05 ± 0.89	0.0646196	9.05 ± 0.89	7.69 ± 1.64
cg20658709	BTBD17	0.0027476	78.74 ± 1.75	80.85 ± 1.52	0.318648	80.85 ± 1.52	79.95 ± 1.84
cg03574746	PSMG2;PSMG2;CEP76;CEP76;CEP76	0.0027507	68.43 ± 3.51	70.73 ± 3.42	0.499264	70.73 ± 3.42	70 ± 2.94
cg00885682	HS3ST2	0.0027512	3.99 ± 0.41	3.09 ± 0.38	0.0883036	3.09 ± 0.38	3.56 ± 0.39
cg27138584	KCNK12	0.0027544	12.91 ± 1.27	15.5 ± 1.6	0.0352738	15.5 ± 1.6	13.07 ± 1.74
cg20423899	LOC100507391	0.0027547	96.29 ± 0.58	97.17 ± 0.45	0.917482	97.17 ± 0.45	97.14 ± 0.86
cg23652526	HNRNPUL1	0.0027572	6.13 ± 0.97	8.89 ± 1.16	0.506766	8.89 ± 1.16	8.29 ± 1.26
cg11911648	Intergenic	0.0027574	4.96 ± 0.88	6.03 ± 0.93	0.34465	6.03 ± 0.93	5.5 ± 0.46
cg19791271	Intergenic	0.0027583	57.66 ± 1.47	59.19 ± 1.91	0.354581	59.19 ± 1.91	58.86 ± 1.6
cg13713257	R3HDM1;R3HDM1;R3HDM1;R3HDM1	0.0027609	95.73 ± 0.7	94.23 ± 1.1	0.411786	94.23 ± 1.1	94.57 ± 0.84
cg17408133	TMEM248	0.0027612	92 ± 1.86	94.41 ± 1.31	0.15128	94.41 ± 1.31	93.23 ± 1.79
cg23504701	ZNF607	0.002762	5.84 ± 1.74	8.79 ± 1.57	0.348617	8.79 ± 1.57	7.72 ± 1.76
cg06876079	CXorf22	0.0027622	4.31 ± 0.58	3.61 ± 0.63	0.0729622	3.61 ± 0.63	4.21 ± 0.49
cg04696992	PLD3;PLD3	0.0027639	95.33 ± 0.91	93.96 ± 0.77	0.235816	93.96 ± 0.77	94.61 ± 0.75
cg11353364	AJAP1;AJAP1	0.0027639	27.73 ± 2.08	29.29 ± 2.28	0.0383388	29.29 ± 2.28	27.41 ± 1.7
cg22162435	BSND	0.0027646	72.52 ± 1.11	74.39 ± 1.19	0.244444	74.39 ± 1.19	73.35 ± 1.03
cg15004702	Intergenic	0.0027648	3.7 ± 0.45	5.22 ± 0.85	0.164733	5.22 ± 0.85	4.65 ± 0.62
cg09029887	Intergenic	0.0027649	86.94 ± 1.3	85.34 ± 1.47	0.330427	85.34 ± 1.47	86.31 ± 2.45
cg23465213	NTM	0.002766	91.3 ± 1.04	93.13 ± 1.13	0.0417047	93.13 ± 1.13	90.21 ± 2.1
cg17101572	SHANK2	0.0027673	8.33 ± 0.92	9.71 ± 0.86	0.558824	9.71 ± 0.86	9.33 ± 1.4
cg21054179	PRKAG1;PRKAG1;PRKAG1;PRKAG1	0.0027716	4.69 ± 0.48	6.14 ± 0.21	0.433496	6.14 ± 0.21	5.86 ± 0.84
cg11816191	Intergenic	0.0027776	78.98 ± 1.59	81.17 ± 1.73	0.520742	81.17 ± 1.73	80.39 ± 2.42
cg11708525	Intergenic	0.0027778	58.05 ± 1.73	60.09 ± 1.18	0.0777604	60.09 ± 1.18	58.4 ± 1.51
cg25338454	ITPR2	0.0027799	92.05 ± 1.07	93.88 ± 0.91	0.481552	93.88 ± 0.91	93.39 ± 1.32
cg00306006	DVL3	0.0027813	86.25 ± 1.31	89.28 ± 1.72	0.17771	89.28 ± 1.72	87.29 ± 1.77
cg12905410	ZNF512	0.0027813	4.5 ± 0.45	6.12 ± 0.76	0.0755766	6.12 ± 0.76	5.04 ± 0.76
cg14950834	SPTBN4;BLVRB	0.0027813	3.11 ± 0.37	4.8 ± 0.99	0.5033	4.8 ± 0.99	4.49 ± 1.34
cg18060171	CACNA1A;CACNA1A	0.0027832	80.16 ± 2.53	81.51 ± 2.08	0.405558	81.51 ± 2.08	82.09 ± 1.41
cg20769820	VWA3A	0.0027852	34 ± 5	35.67 ± 5.23	0.252968	35.67 ± 5.23	34.27 ± 4
cg03309738	Intergenic	0.0027862	87.86 ± 1.44	89.15 ± 0.98	0.863132	89.15 ± 0.98	88.86 ± 1.93
cg11552239	LINC01151;LINC01151	0.0027866	85.27 ± 0.83	82.9 ± 1.52	0.0776615	82.9 ± 1.52	85.41 ± 2.17
cg26210055	Intergenic	0.0027866	64.48 ± 2.86	67.61 ± 2.31	0.180035	67.61 ± 2.31	66.11 ± 3.06
cg10401367	CDC42SE1;CDC42SE1;MLLT11	0.0027875	75.88 ± 5.09	78.79 ± 4.61	0.352514	78.79 ± 4.61	77.89 ± 5.56
cg05403655	PKNOX2	0.0027885	78.92 ± 3.19	81.8 ± 3.86	0.0674468	81.8 ± 3.86	79.71 ± 3.22
cg09452082	Intergenic	0.0027888	89.51 ± 0.53	87.89 ± 1.02	0.227745	87.89 ± 1.02	88.94 ± 1.21
cg16340532	CABP1	0.0027901	18.39 ± 1.07	21.44 ± 1.57	0.381449	21.44 ± 1.57	20.5 ± 1.29
cg24543944	ZFP1	0.0027907	43.44 ± 2.83	46.99 ± 1.71	0.171158	46.99 ± 1.71	45.68 ± 1.31
cg15859391	CDKAL1	0.002794	8.31 ± 1.31	9.86 ± 1.91	0.447711	9.86 ± 1.91	10.27 ± 1.95
cg25882591	Intergenic	0.0027984	81.86 ± 1.53	79.11 ± 2.62	0.839296	79.11 ± 2.62	79.4 ± 0.78
cg03015225	DSCR9	0.0027988	57.69 ± 4.91	60.03 ± 4.1	0.111438	60.03 ± 4.1	58.34 ± 4.11
cg06206403	KCNK7;KCNK7;KCNK7;KCNK7;KCNK7;KCNK7;KCNK7;KCNK7	0.0027998	78.18 ± 2.16	80.12 ± 1.35	0.466133	80.12 ± 1.35	79.58 ± 1.22
cg12865970	PLEKHA5;PLEKHA5;PLEKHA5;PLEKHA5	0.0028	73.92 ± 2.74	79.45 ± 3.2	0.0889276	79.45 ± 3.2	75.98 ± 3.85
cg22888990	Intergenic	0.0028008	29.57 ± 2.92	32.18 ± 2.76	0.575456	32.18 ± 2.76	31.61 ± 1.51
cg14438798	Intergenic	0.0028022	84.14 ± 1.47	87.34 ± 0.94	0.931994	87.34 ± 0.94	87.28 ± 1.25
cg01664670	MAFB;MAFB	0.0028031	5.01 ± 0.46	5.85 ± 0.46	0.265334	5.85 ± 0.46	5.16 ± 1.2
cg16332003	Intergenic	0.0028034	92.18 ± 1.17	90.55 ± 0.72	0.115234	90.55 ± 0.72	91.98 ± 1.35
cg14529552	Intergenic	0.0028044	90.05 ± 0.91	87.95 ± 0.43	0.522037	87.95 ± 0.43	87.41 ± 1.55
cg08611544	MSANTD3;MSANTD3;MSANTD3;MSANTD3	0.0028062	57.6 ± 2.77	60.42 ± 2.52	0.784517	60.42 ± 2.52	60.17 ± 1.91
cg05508360	ZNF792	0.002807	3.6 ± 0.2	3.04 ± 0.35	0.0196969	3.04 ± 0.35	3.43 ± 0.26
cg14292664	GFM2;GFM2;GFM2;GFM2;GFM2;NSA2;NSA2;NSA2	0.0028076	3.32 ± 0.34	2.67 ± 0.42	0.136324	2.67 ± 0.42	3.14 ± 0.46
cg10717425	SPPL3	0.0028084	89.56 ± 1.35	92.51 ± 1.56	0.871347	92.51 ± 1.56	92.28 ± 2.01
cg01508757	DHX37	0.0028089	83.04 ± 1.42	85.01 ± 1.41	0.776724	85.01 ± 1.41	84.66 ± 1.67
cg06508738	PRR23C	0.0028089	91.39 ± 1.13	92.49 ± 0.87	0.553365	92.49 ± 0.87	91.86 ± 1.8
cg14250498	Intergenic	0.0028098	17.6 ± 1.76	19.53 ± 1.19	0.203336	19.53 ± 1.19	17.93 ± 2.97
cg23549539	Intergenic	0.0028117	4.25 ± 0.37	3.61 ± 0.3	0.0716035	3.61 ± 0.3	4.03 ± 0.58
cg21416126	Intergenic	0.0028118	94.97 ± 0.63	95.95 ± 0.68	0.100026	95.95 ± 0.68	94.97 ± 1.12
cg05319686	DRG2	0.0028134	84.57 ± 1.78	86.19 ± 0.96	0.404121	86.19 ± 0.96	85.26 ± 1.72
cg17261085	C14orf79	0.0028168	89.88 ± 0.44	92.37 ± 1.07	0.0961147	92.37 ± 1.07	90.81 ± 1.79
cg00700485	WFDC2	0.0028239	12.34 ± 1.8	14.93 ± 1.32	0.293131	14.93 ± 1.32	14.34 ± 1.67
cg01620309	ADAM11	0.0028261	5.51 ± 0.52	4.83 ± 0.63	0.801808	4.83 ± 0.63	4.76 ± 0.55
cg08965136	C10orf11;C10orf11	0.0028294	89.41 ± 1.17	87.36 ± 0.95	0.628806	87.36 ± 0.95	87.57 ± 0.64
cg03493639	MTMR2;MTMR2;MTMR2;MTMR2;MTMR2;MTMR2;MTMR2	0.0028295	5.77 ± 0.85	6.46 ± 0.76	0.489745	6.46 ± 0.76	7.07 ± 1.84
cg21876001	ZNF653	0.002831	96.25 ± 0.26	95.19 ± 0.45	0.0837014	95.19 ± 0.45	95.54 ± 0.59
cg13886135	ADCYAP1R1	0.0028326	71.89 ± 2.51	75.57 ± 3.14	0.19132	75.57 ± 3.14	73.53 ± 4.18
cg13312337	LOC100189589	0.0028328	81.21 ± 1.99	84.91 ± 2.08	0.112338	84.91 ± 2.08	82.68 ± 1.88
cg00116882	PIANP;PIANP;PIANP	0.0028332	3.55 ± 0.22	2.87 ± 0.39	0.447571	2.87 ± 0.39	3.15 ± 0.54
cg22242614	SYNJ2	0.0028336	6.54 ± 0.48	4.87 ± 0.6	0.010149	4.87 ± 0.6	5.78 ± 0.71
cg11168747	Intergenic	0.0028341	87.8 ± 2.62	90.36 ± 1.36	0.608641	90.36 ± 1.36	90.73 ± 2.26
cg06152434	SOX3;SOX3	0.0028383	14.88 ± 0.93	17.89 ± 1.62	0.213031	17.89 ± 1.62	16.76 ± 3.25
cg16762595	Intergenic	0.0028401	92.27 ± 0.46	90.25 ± 1.06	0.73947	90.25 ± 1.06	89.72 ± 1.87
cg05606136	PDE4C;PDE4C;PDE4C	0.0028412	26.59 ± 2.42	29.25 ± 2.58	0.143923	29.25 ± 2.58	27.77 ± 2.58
cg07930620	Intergenic	0.0028423	79.28 ± 2.86	82.05 ± 1.61	0.866962	82.05 ± 1.61	81.9 ± 1.67
cg27350579	EPX	0.0028424	61.43 ± 3.38	65.2 ± 2.44	0.120144	65.2 ± 2.44	62.68 ± 2.85
cg03651585	SUGCT;SUGCT;SUGCT;SUGCT	0.0028426	34.35 ± 2.09	37.25 ± 3.01	0.717553	37.25 ± 3.01	36.72 ± 3.44
cg10180146	OR2V1	0.0028432	73.52 ± 5.31	77.4 ± 3.53	0.1051	77.4 ± 3.53	75.95 ± 3.34
cg14039212	TTC6	0.0028452	79.31 ± 1.83	81.09 ± 1.78	0.471016	81.09 ± 1.78	81.8 ± 2.37
cg13563863	FZR1;FZR1	0.002846	8.1 ± 0.93	6.35 ± 0.84	0.0302172	6.35 ± 0.84	7.84 ± 0.72
cg17679864	RPL14;RPL14;RPL14	0.0028467	2.47 ± 0.42	3.33 ± 0.78	0.31802	3.33 ± 0.78	2.78 ± 1.11
cg26970587	MORC1	0.0028475	93 ± 1.44	91.11 ± 1.67	0.0420953	91.11 ± 1.67	92.35 ± 1.16
cg03382601	Intergenic	0.0028511	87.18 ± 0.73	85.67 ± 0.68	0.284171	85.67 ± 0.68	86.37 ± 1.68
cg09377791	Intergenic	0.0028525	43.21 ± 4.5	49.16 ± 5.21	0.985138	49.16 ± 5.21	49.19 ± 5.86
cg13792929	LOC101928855;RPTOR;RPTOR	0.0028529	93.19 ± 1.5	94.41 ± 1.02	0.610274	94.41 ± 1.02	93.76 ± 1.83
cg00163480	SERPINA10;SERPINA10	0.0028535	29.57 ± 1.91	32.45 ± 2.62	0.0942798	32.45 ± 2.62	30.41 ± 1.27
cg20430101	NDUFB11;RBM10;NDUFB11;RBM10;NDUFB11;NDUFB11	0.0028564	57.04 ± 1.51	59.21 ± 1.68	0.324601	59.21 ± 1.68	58.32 ± 2.33
cg18273840	HCN1	0.0028568	4.61 ± 0.67	3.84 ± 0.46	0.930745	3.84 ± 0.46	3.93 ± 0.76
cg14857792	SLC12A1	0.0028582	77.26 ± 0.52	79.05 ± 1.07	0.0504825	79.05 ± 1.07	77.69 ± 0.91
cg00607062	SGCZ	0.0028591	61.1 ± 1.87	63.1 ± 2.03	0.158373	63.1 ± 2.03	61.67 ± 1.05
cg14565626	NTSR1	0.0028591	44.15 ± 1.59	46 ± 1.66	0.0734209	46 ± 1.66	44.18 ± 0.68
cg16363781	DLG2;DLG2;DLG2;DLG2	0.0028622	92.28 ± 1.46	89.81 ± 1.13	0.799235	89.81 ± 1.13	89.98 ± 1.72
cg15392457	Intergenic	0.0028623	82.65 ± 0.98	84.4 ± 1.24	0.094209	84.4 ± 1.24	82.56 ± 1.75
cg08238278	Intergenic	0.0028631	91.73 ± 0.73	89.69 ± 0.89	0.782107	89.69 ± 0.89	89.8 ± 2.92
cg22272641	TMEM220-AS1	0.0028639	14.85 ± 3.04	17.65 ± 2.62	0.0817785	17.65 ± 2.62	16.66 ± 2.66
cg14531133	SMIM22;SMIM22;SMIM22;SEPT12;SEPT12	0.0028643	3.09 ± 0.15	3.83 ± 0.29	0.264233	3.83 ± 0.29	3.48 ± 0.74
cg06103395	TRERF1;TRERF1	0.0028671	87.75 ± 1.35	89.18 ± 1.1	0.0768705	89.18 ± 1.1	87.27 ± 1.41
cg12474835	Intergenic	0.0028673	35.65 ± 2.2	37.7 ± 2.56	0.136684	37.7 ± 2.56	36.36 ± 2.78
cg10143295	NPAS3;NPAS3;NPAS3;NPAS3	0.0028682	93.31 ± 1.08	94.97 ± 0.91	0.986928	94.97 ± 0.91	94.85 ± 1.75
cg04649985	CAMKK2;CAMKK2;CAMKK2;CAMKK2;CAMKK2;CAMKK2;CAMKK2;CAMKK2;CAMKK2	0.002871	63.88 ± 2.35	69.65 ± 0.44	0.562171	69.65 ± 0.44	69.2 ± 1.78
cg23913054	LOC105376360	0.0028718	11.17 ± 2.11	14.11 ± 2.03	0.373037	14.11 ± 2.03	13.23 ± 2.42
cg05381812	SDK1	0.0028741	94.13 ± 1.76	95.52 ± 1.22	0.152085	95.52 ± 1.22	94.85 ± 1.15
cg14823287	WBP1;INO80B	0.0028743	4.88 ± 0.47	4.32 ± 0.63	0.420919	4.32 ± 0.63	3.98 ± 0.42
cg15550302	Intergenic	0.0028754	20.8 ± 1.89	24.69 ± 1.53	0.0840878	24.69 ± 1.53	22.73 ± 1.71
cg09927483	SEL1L	0.0028761	4.8 ± 0.83	3.92 ± 0.4	0.0425923	3.92 ± 0.4	6.2 ± 2.56
cg12559827	RAB11FIP5	0.0028764	89.54 ± 1.71	93.13 ± 0.58	0.426414	93.13 ± 0.58	93.39 ± 0.71
cg06469799	PALMD	0.0028766	95.19 ± 0.79	93.82 ± 1.11	0.153349	93.82 ± 1.11	94.76 ± 0.64
cg27634151	GPR83	0.002879	4.12 ± 0.72	2.91 ± 0.58	0.860263	2.91 ± 0.58	3.04 ± 0.77
cg20673767	PTPRN2;PTPRN2;PTPRN2	0.0028804	85.46 ± 1.52	82.93 ± 1.34	0.137405	82.93 ± 1.34	84.39 ± 1.65
cg08848148	Intergenic	0.002881	5.94 ± 1.03	7.48 ± 0.88	0.0146754	7.48 ± 0.88	5.86 ± 0.49
cg23210533	LOC728661;CDK11B;CDK11B;CDK11B;CDK11B;CDK11B;CDK11B	0.0028841	64.73 ± 1.12	66.67 ± 0.8	0.217572	66.67 ± 0.8	65.99 ± 0.94
cg24489571	EPC2	0.0028845	6 ± 0.76	4.7 ± 0.46	0.146437	4.7 ± 0.46	5.49 ± 1.18
cg07477187	CLK2	0.0028852	5.27 ± 0.41	4.37 ± 0.58	0.838502	4.37 ± 0.58	4.36 ± 0.99
cg16948199	DHRS12;DHRS12	0.0028863	4.26 ± 0.32	3.43 ± 0.42	0.0225897	3.43 ± 0.42	4.17 ± 0.76
cg19025497	SIL1;SIL1	0.0028869	5.29 ± 1.32	6.59 ± 1.74	0.10614	6.59 ± 1.74	5.36 ± 0.98
cg17120358	MIR6880;NCOR2;NCOR2;NCOR2	0.0028894	87.05 ± 1.41	88.99 ± 1.25	0.969216	88.99 ± 1.25	88.97 ± 1.78
cg10702552	BIK	0.0028899	88.56 ± 2.38	90.63 ± 2.35	0.850513	90.63 ± 2.35	90.93 ± 1.51
cg09580798	AMPD3;AMPD3;AMPD3;AMPD3;AMPD3	0.0028903	78.78 ± 2.53	82.46 ± 2.1	0.268638	82.46 ± 2.1	81.16 ± 2.47
cg23314826	Intergenic	0.0028903	92.24 ± 0.44	93.06 ± 0.52	0.0749677	93.06 ± 0.52	92.36 ± 0.62
cg18968920	PRPF40A	0.0028906	14.96 ± 1.79	18.28 ± 1.71	0.14396	18.28 ± 1.71	16.13 ± 3.31
cg08567760	C20orf79	0.002891	2.87 ± 0.26	3.61 ± 0.51	0.230727	3.61 ± 0.51	3.21 ± 0.46
cg18224819	RPTOR;RPTOR	0.0028918	85.65 ± 0.73	83.21 ± 0.83	0.582164	83.21 ± 0.83	83.71 ± 2.18
cg17724121	HBE1	0.0028925	55.57 ± 3.52	61.69 ± 4.08	0.389964	61.69 ± 4.08	59.91 ± 2.74
cg17888096	SPATA20	0.0028929	5.32 ± 0.48	3.84 ± 0.58	0.705133	3.84 ± 0.58	3.72 ± 0.43
cg05089090	CCNA1;CCNA1;CCNA1;CCNA1	0.0028938	9.83 ± 1.13	11.97 ± 2.03	0.0124896	11.97 ± 2.03	10.79 ± 1.52
cg20139706	Intergenic	0.0028964	34.08 ± 3.43	35.59 ± 3.17	0.436688	35.59 ± 3.17	35.02 ± 2.75
cg19488708	PTGDR;PTGDR	0.0028975	62.97 ± 4.1	67.03 ± 2.49	0.781972	67.03 ± 2.49	66.57 ± 2.62
cg22087119	ADGRG7;ADGRG7	0.0028982	44.76 ± 1.85	47.03 ± 2.04	0.747929	47.03 ± 2.04	47.32 ± 3
cg21115727	SAMD4A;SAMD4A;SAMD4A	0.0028984	92.05 ± 0.63	90.5 ± 1.14	0.511983	90.5 ± 1.14	90.94 ± 1.12
cg05472405	KHDC1L;KHDC1L	0.0028988	44.04 ± 0.69	45.99 ± 1.03	0.256598	45.99 ± 1.03	46.84 ± 1.22
cg07525267	NKD2	0.0028988	50.79 ± 2.34	53.15 ± 1.97	0.0659052	53.15 ± 1.97	51.62 ± 1.26
cg02886263	MIR365-1	0.0028998	92.9 ± 0.73	90.04 ± 1.32	0.354258	90.04 ± 1.32	90.89 ± 1.77
cg22587204	Intergenic	0.0029001	69.43 ± 1.56	72.34 ± 0.89	0.204501	72.34 ± 0.89	70.56 ± 2.78
cg02330719	Intergenic	0.0029004	46.32 ± 1.77	48.17 ± 1.68	0.395679	48.17 ± 1.68	47.63 ± 0.9
cg13930388	FIBCD1;FIBCD1	0.0029016	23.2 ± 2.76	25.41 ± 3.15	0.0627692	25.41 ± 3.15	24.64 ± 3.17
cg18516191	NCEH1;NCEH1;NCEH1;NCEH1	0.0029029	94.85 ± 1.21	93.41 ± 1.44	0.121917	93.41 ± 1.44	94.24 ± 1.95
cg00738458	MKL2;MKL2	0.0029036	72.1 ± 1.75	73.82 ± 1.44	0.451201	73.82 ± 1.44	73.14 ± 1.06
cg02996131	SYNE1;SYNE1	0.0029039	72.52 ± 4.09	76.47 ± 3.91	0.77173	76.47 ± 3.91	75.44 ± 4.83
cg03996447	MAP3K15	0.0029047	4.64 ± 0.89	3.53 ± 0.54	0.902553	3.53 ± 0.54	3.53 ± 0.22
cg15260978	NADK	0.0029062	74.92 ± 2.95	77.24 ± 2.76	0.896773	77.24 ± 2.76	77.3 ± 3.24
cg18639984	Intergenic	0.0029062	4.74 ± 0.7	4.04 ± 0.52	0.175935	4.04 ± 0.52	4.5 ± 0.39
cg09468924	MVK;MVK;MVK	0.0029133	81.34 ± 2.75	84.84 ± 1.8	0.169583	84.84 ± 1.8	83.25 ± 2.08
cg18956825	Intergenic	0.0029158	7.21 ± 1.07	10.1 ± 2.13	0.278463	10.1 ± 2.13	8.77 ± 3.08
cg21034405	Intergenic	0.0029161	4.99 ± 0.65	3.95 ± 0.41	0.780308	3.95 ± 0.41	3.93 ± 1.11
cg17446503	GLT8D1;GLT8D1;GLT8D1;GLT8D1;SPCS1	0.0029178	4.94 ± 0.5	4.21 ± 0.61	0.931886	4.21 ± 0.61	4.18 ± 0.75
cg13338289	KIAA1462	0.0029181	94.6 ± 1.21	92.37 ± 1.29	0.354234	92.37 ± 1.29	93.3 ± 1.47
cg24744557	SLC6A12;SLC6A12;SLC6A12	0.0029183	12.54 ± 2.26	14.3 ± 2.11	0.179947	14.3 ± 2.11	13.13 ± 1.12
cg23471798	Intergenic	0.0029189	90.85 ± 1.14	93.43 ± 1.64	0.138519	93.43 ± 1.64	91.63 ± 2.1
cg08369872	DERL3;DERL3;DERL3;DERL3;DERL3;DERL3	0.0029194	2.21 ± 0.21	2.61 ± 0.22	0.128053	2.61 ± 0.22	2.1 ± 0.6
cg23556699	Intergenic	0.0029255	2.97 ± 0.2	3.3 ± 0.2	0.247315	3.3 ± 0.2	3.03 ± 0.41
cg09547940	Intergenic	0.0029271	64.58 ± 2.31	66.25 ± 2.09	0.510645	66.25 ± 2.09	65.39 ± 2.48
cg11469857	Intergenic	0.0029278	87 ± 1.33	88.54 ± 1.12	0.790767	88.54 ± 1.12	88.29 ± 1.33
cg27021131	RPGRIP1L;RPGRIP1L;FTO;FTO	0.0029278	4.11 ± 0.41	3.5 ± 0.48	0.974729	3.5 ± 0.48	3.56 ± 0.8
cg01291592	MYO1D;MYO1D	0.00293	90.46 ± 2.92	94.33 ± 1.41	0.0038162	94.33 ± 1.41	91.56 ± 0.7
cg14529256	KIF26B	0.0029306	64.11 ± 6.31	65.35 ± 6.28	0.609549	65.35 ± 6.28	65 ± 6.58
cg07566505	Intergenic	0.0029371	84.58 ± 1.54	87.34 ± 1.93	0.231901	87.34 ± 1.93	89.41 ± 4.36
cg27615578	LRRC8E	0.0029392	13.29 ± 1.05	15.37 ± 1.52	0.235368	15.37 ± 1.52	14.54 ± 0.36
cg09666192	MYLK2	0.0029396	53.45 ± 2.18	55.82 ± 1.51	0.0228661	55.82 ± 1.51	53.69 ± 1.21
cg01722003	CNTNAP2;MIR548T	0.0029404	82.66 ± 2.42	86.18 ± 2.47	0.555314	86.18 ± 2.47	85.61 ± 0.93
cg06283270	Intergenic	0.0029404	7.61 ± 0.87	8.92 ± 0.61	0.0299325	8.92 ± 0.61	7.49 ± 0.97
cg24419614	Intergenic	0.0029421	6.28 ± 1.11	5.13 ± 0.79	0.223968	5.13 ± 0.79	6.27 ± 1.71
cg08028431	LINC01221	0.0029427	70.87 ± 2.44	76.34 ± 2.82	0.0987532	76.34 ± 2.82	73.62 ± 2.71
cg25646128	NOL11	0.0029445	86.82 ± 2.07	90.63 ± 1.23	0.0551007	90.63 ± 1.23	86.82 ± 3.33
cg13858223	SYNE3	0.0029481	84.32 ± 1.02	86.31 ± 1.34	0.568994	86.31 ± 1.34	86.79 ± 1.43
cg11685510	Intergenic	0.0029484	5.39 ± 1.23	7.64 ± 1.38	0.0283274	7.64 ± 1.38	5.98 ± 1.21
cg18640514	Intergenic	0.0029496	10.91 ± 3.19	13.83 ± 2.48	0.178235	13.83 ± 2.48	12.1 ± 1.6
cg05120716	PRKCB;PRKCB	0.0029509	4.58 ± 0.64	3.26 ± 0.63	0.114419	3.26 ± 0.63	4.31 ± 0.83
cg02122937	DIP2C	0.0029518	64.52 ± 3.02	67.09 ± 2.15	0.661488	67.09 ± 2.15	66.67 ± 1.96
cg00247361	CAMK2D;CAMK2D;CAMK2D;CAMK2D;CAMK2D;CAMK2D	0.0029529	94.99 ± 0.96	93.25 ± 1.13	0.400175	93.25 ± 1.13	93.88 ± 1.32
cg08152065	Intergenic	0.0029597	57.23 ± 2.34	59.48 ± 2.79	0.487297	59.48 ± 2.79	59.92 ± 2.06
cg13697552	PAM;PAM;PAM;PAM;PAM;PAM	0.0029616	6.95 ± 1.28	9.16 ± 0.81	0.194889	9.16 ± 0.81	7.7 ± 2.51
cg27343216	PREPL;PREPL;C2orf34;PREPL;PREPL;PREPL;PREPL;PREPL	0.0029635	3.1 ± 0.47	2.65 ± 0.27	0.0489446	2.65 ± 0.27	3.1 ± 0.32
cg10347949	XRCC3;XRCC3;XRCC3	0.0029703	89.51 ± 1.54	91.72 ± 1.47	0.0574963	91.72 ± 1.47	90.51 ± 0.63
cg01613817	ERG;ERG;ERG;ERG;ERG;ERG	0.0029705	34.21 ± 2.06	35.4 ± 2.17	0.116387	35.4 ± 2.17	33.87 ± 3.32
[truncated: 35,386 more rows]
